# Supplementary material for: Activation-pathway transitions in human voltage-gated proton channels revealed by a non-canonical fluorescent amino acid
Source: eLife journal article supplement (doi:10.7554/elife.85836), 2023-01-25
Supplement: fig5-code1 [file DefinitionSchemeI_Fig5E.pdf › 26-12-2022-RA-eLife-85836/DefinitionSchemeI_Fig5E.pdf]

```

#pragma rtGlobals=1      // Use modern global access method.

//      Co <--a/b-->C1 <--c/d-->C2<--e/f-->C3<--g/h-->0

Function SequentialFour(pw, tt, yw, dydt) // four transitions five states
    Wave pw //pw[0]= alfa1
            //pw[1]= beta1
            //pw[2]= alfa2
            //pw[3]= beta2
            //pw[4]= alfa3
            //pw[5]= beta3
            //pw[6]= alfa4
            //pw[7]= beta4
    Variable tt // time variable
    Wave yw //yw[0]= C0
            //yw[1]= C1
            //yw[2]= C2
            //yw[3]= C3
            //yw[4]= 0

    Wave dydt
    Variable B
        B = 1
    dydt[0] = -pw[0]*yw[0]+pw[1]*yw[1]
    dydt[1] = -(pw[2]+pw[1])*yw[1]+pw[0]*yw[0]+pw[3]*yw[2]
    dydt[2] = -(pw[3]+pw[4])*yw[2]+pw[2]*yw[1]+pw[5]*yw[3]
    dydt[3] = -(pw[5]+pw[6])*yw[3]+pw[4]*yw[2]+pw[7]*yw[4]
    dydt[4] = -pw[7]*yw[4]+pw[6]*yw[3]
End

```
