# Supplementary material for: Activation-pathway transitions in human voltage-gated proton channels revealed by a non-canonical fluorescent amino acid
Source: eLife journal article supplement (doi:10.7554/elife.85836), 2023-01-25
Supplement: fig5-code2 [file elife-85836-fig5-code2-v2.zip]

```

#pragma rtGlobals=1      // Use modern global access method.
function ODEInput_SequentialFive(name, namef, nameI , numvolts)
string name
string namef
string nameI

variable numvolts
string textvolt, textpo, textvars
variable t
variable Von, Voff, Vpre, conc, normSSi
variable numptson, numptsoff, numptspre
    numptspre = 3000
    numptson = 2500
    numptsoff = 5000
variable srate // sample rate in seconds
    srate = .001// seconds
variable prestart, onstart, offstart
    prestart =0
    onstart = numptspre*srate
    offstart = numptson*srate //;print offstart
Von = -120; Voff = -100; Vpre = -100
make /O/N = (numvolts) vt = Von+p*20, Iss, Itail, Pv, Fv
variable N, g, j, Vrev
Vrev = -120; N=8; g = .0083 // pS x e-3 for V on mV
j = 0
make/O/N= (numptspre) temp, tempf, I0
make/O/N= (numptson) temp2, temp2f, I2
make/O/N= (numptsoff) temp3, temp3f, I3
make/O/N= (numptson+numptsoff+numptspre) temp4, temp4f, Itot

variable D = 8// represents the effect of deltapH
make/D/O/N = 8 K
K[0] = .1*D// alfa1      // rate constants in s-1 @ 0 mV
K[1] = 5// beta1
K[2] = 2*D// alfa2
K[3] = 1// beta2
K[4] = .11*D// alfa3
K[5] = 1// beta3
K[6] = 0 //open MAKES A 4-STATE MODEL
K[7] = 0 //close MAKES A 4-STATE MODEL

variable z1, z_1,z2, z_2,z3, z_3,zon,zoff
    z1= 0.3
    z_1= -0.3
    z2= 0.4
    z_2= -0.3
    z3= 0.8
    z_3= -0.8
    zon= 0.0
    zoff= -0.0

variable f0, f1, f2, f3,fo //fluorecence of each state
f0 = 0

```

```
f1 = 1
f2 = 2
f3 = 4
fo = 0
```

```
//-----
for (j =0; j <= numvolts-1; j += 1)
t=1
do
    make/D/0/N =8 PP //rate constants order: k1,k-1,k2,k-2,ki,k-i,kii,k-i
    PP[0] = K[0] *exp(z1*Vpre*0.04) //alfa
    PP[1] = K[1] *exp(z_1*Vpre*0.04) //beta
    PP[2] = K[2] *exp(z2*Vpre*0.04) //alfa
    PP[3] = K[3] *exp(z_2*Vpre*0.04) //beta
    PP[4] = K[4] *exp(z3*Vpre*0.04) //alfa
    PP[5] = K[5] *exp(z_3*Vpre*0.04) //beta
    PP[6] = K[6] *exp(zon*Vpre*0.04) //alfa
    PP[7] = K[7] *exp(zoff*Vpre*0.04) //beta

    Make/D/0/N=(numptspre,5) YY // wave to receive results
    SetScale/P x prestart,srate, "s", YY

    YY[0][0] = 1 // initial condition
    YY[0][1] = 0
    YY[0][2] = 0
    YY[0][3] = 0
    YY[0][4] = 0

    IntegrateODE/M=3 SequentialFour, PP, YY
    //SetScale/P x prestart,srate, "s", YY

    t=2
while (t<=1)
////////////////////////////////////
do
    Make/D/0/N=(numptson,5) YYo // wave to receive results
    SetScale/P x onstart, srate, "s", YYo
    YYo[0][0] = YY[numptspre][0] // initial condition:ON steady state
    YYo[0][1] = YY[numptspre][1]
    YYo[0][2] = YY[numptspre][2]
    YYo[0][3] = YY[numptspre][3]
    YYo[0][4] = YY[numptspre][4]

    Make/D/0/N=8 PP
    PP[0] = K[0] *exp(z1*Vt(j)*0.04) //alfa
    PP[1] = K[1] *exp(z_1*Vt(j)*0.04) //beta
    PP[2] = K[2] *exp(z2*Vt(j)*0.04) //alfa
    PP[3] = K[3] *exp(z_2*Vt(j)*0.04) //beta
    PP[4] = K[4] *exp(z3*Vt(j)*0.04) //alfa
```

```

PP[5] = K[5] *exp(z_3*Vt(j)*0.04)      //beta
PP[6] = K[6] *exp(zon*Vt(j)*0.04)      //alfa
PP[7] = K[7] *exp(zoff*Vt(j)*0.04)      //beta

IntegrateODE/M=3 SequentialFour, PP, YYo
// SetScale/P x onstart, srate,"s", YYo

t=3
//-----

while(t<=2)
do
  Make/D/0/N=(numptsoff,5) YYoo // wave to receive results
  SetScale/P x offstart, srate,"s", YYoo

  YYoo[0][0] = YYo[numptson][0] // initial condition:ON steady state
  YYoo[0][1] = YYo[numptson][1]
  YYoo[0][2] = YYo[numptson][2]
  YYoo[0][3] = YYo[numptson][3]
  YYoo[0][4] = YYo[numptson][4]

  Make/D/0/N=8 PP
  PP[0] = K[0] *exp(z1*Voff*0.04)      //alfa
  PP[1] = K[1] *exp(z_1*Voff*0.04)      //beta
  PP[2] = K[2] *exp(z2*Voff*0.04)      //alfa
  PP[3] = K[3] *exp(z_2*Voff*0.04)      //beta
  PP[4] = K[4] *exp(z3*Voff*0.04)      //alfa
  PP[5] = K[5] *exp(z_3*Voff*0.04)      //beta
  PP[6] = K[6] *exp(zon*Voff*0.04)      //alfa
  PP[7] = K[7] *exp(zoff*Voff*0.04)      //beta

  IntegrateODE/M=3 SequentialFour, PP, YYoo
  // SetScale/P x offstart, srate,"s", YYoo

  t=4
while(t<=3)
//-----

temp = YY[p][3] //;setscale /P x prestart,srate,"s", temp //calculate open proba

tempf = f0*YY[p][0]+f1*YY[p][1]+f2*YY[p][2]+f3*YY[p][3]+fo*YY[p][4] //calculate
setscale /P x prestart,srate,"s", temp, tempf, I0

I0 = temp*N*g*(Vpre-Vrev) // current time course
// Iss[j] = temp[numptspre]/(N*g*vt(j))

temp2 = YYo[p][3] //calculate open probability

temp2f = f0*YYo[p][0]+f1*YYo[p][1]+f2*YYo[p][2]+f3*YYo[p][3]+fo*YYo[p][4]

setscale /P x onstart,srate,"s", temp2, temp2f, I2

```

```

I2 = temp2*N*g*(vt(j)-Vrev) // current time course
// -----add as leak current
duplicate/o temp2, leak
leak =(g*2.6)*(vt(j)-Voff)
I2=I2+leak
//-----
wavestats/Q temp2
Iss[j] = V_max
Pv[j]=temp2[numptson]
Fv[j]=temp2f[numptson]

temp3 = YYoo[p][3] //calculate open probability

temp3f = f0*YYoo[p][0]+f1*YYoo[p][1]+f2*YYoo[p][2]+f3*YYoo[p][3]+fo*YYoo[p][4]

setscale /P x offstart,srate,"s", temp3, temp3f, I3

I3 = temp3*N*(g)*(Voff-Vrev)
Itail[j] = temp3(offstart+.2); //print offstart
normSSi=Itail[0]
concatenate /O/NP {temp, temp2,temp3}, temp4
concatenate /O/NP {tempf, temp2f,temp3f}, temp4f
concatenate /O/NP {I0, I2, I3}, Itot

duplicate/o temp4, $name+"_" +num2str(j)
duplicate/o temp4f, $namef+"_" +num2str(j)
duplicate/o Itot, $nameI+"_" +num2str(j)

//display $nameon+"_" +num2str(j) ; appendtograph $nameoff+"_" +num2str(j)

endfor
//sprintf textvolt, "v0=%g,v1=%g,v2=%g,v3=%g", vt[0],vt[1],vt[2],vt[3]
//sprintf textpo, "po=%g", temp[numptson]/(N*g*vt(j))
//textbox/C/N =variables textvolt
//textbox/C/N= po textpo
//sprintf textvars, "L=%g,K=%g,Kv=%g", k[4]/k[5],k[2]/k[3],k[0]/k[1]
//textbox /C/N= vars textvars
Itail=itail/normSSi
//print offstart+onstart
end

```
