# Supplementary material for: Activation-pathway transitions in human voltage-gated proton channels revealed by a non-canonical fluorescent amino acid
Source: eLife. 2023 Jan 25;12:e85836. doi: 10.7554/eLife.85836 (PMC9925047; doi:10.7554/eLife.85836)
Supplement: Figure 1—source data 1. [file elife-85836-fig1-data1.xlsx]

## Sheet: Figure 1D
Figure 1D		Hv1-WT	ΔpH=1
Normalized conductances		Membrane potential (mV)	GNorm_exp_1	GNorm_exp_2	GNorm_exp_3	GNorm_exp_4	GNorm_exp_5	Average	S.D.	S.E.M.
Note:		-60	-0.14034	-0.144175	0.0213977	0.214142	-0.00787623	-0.0113702	0.13131	0.0587238
Gnorm : Normalized conductace		-40	-0.0122979	-0.012639	0.00187642	0.0187671	-0.000687801	-0.000996246	0.0115084	0.00514672
		-20	0.00301006	0.00309253	-0.000459251	-0.00459156	0.000168926	0.000244141	0.00281596	0.00125933
SD: Standard deviation		0	0.122331	0.19499	0.0292247	0.100343	0.0248442	0.0943467	0.0632767	0.0282982
S.E.M.: Standard error		20	0.31181	0.456931	0.236256	0.553523	0.18864	0.349432	0.136593	0.061086
		40	0.441031	0.641154	0.512168	0.869773	0.472226	0.58727	0.156826	0.0701349
		60	0.542829	0.781436	0.692339	0.973353	0.663682	0.730728	0.143327	0.0640978
		80	0.661965	0.909009	0.820952	0.989012	0.793321	0.834852	0.110519	0.0494257
		100	0.780848	1	0.910333	0.993621	0.888722	0.914705	0.0801436	0.0358413
		120	0.894133		0.954551	1	0.957962	0.951661	0.0377301	0.018865
		140	1		1	0.978021	1	0.994505	0.00951728	0.00475864
		Hv1-Q191Anap	ΔpH=1
		Membrane potential (mV)	GNorm_exp_1	GNorm_exp_2	GNorm_exp_3	GNorm_exp_4	GNorm_exp_5	GNorm_exp_6	GNorm_exp_7	GNorm_exp_8	GNorm_exp_9	GNorm_exp_10	GNorm_exp_11	GNorm_exp_12	GNorm_exp_13	Average	S.D.	S.E.M.
		-100	0.00361806	0.00340072	0.00383678	0.00194653	0.00396459	0.000780218	0.00113803	0.0312974	0.00016454	0.00136757	0.000865196	0.0430806	0.00312694	0.00758363	0.0128931	0.00357591
		-80	-0.00724742	-0.00532476	0.00444847	-0.0041069	-0.00649616	-0.0029303	-0.00093246	0.00435858	-0.000170126	-0.00265067	-0.0017983	0.00540896	0.000150057	-0.00133008	0.00396869	0.00110072
		-60	-0.167958	-0.231175	-0.780854	-0.0809777	-0.255879	0.0316783	-0.119786	-0.216408	-0.0154733	-0.0678282	-0.0369318	-0.509882	-0.00745409	-0.189148	0.219569	0.0608975
		-40	-0.00753893	-0.0086942	-0.021203	-0.00384807	-0.00983449	-0.000137503	-0.00383885	-0.00474144	-0.000514941	-0.00294583	-0.00173169	-0.0270614	-0.000163236	-0.00709643	0.00794389	0.00220324
		-20	-0.00592335	-0.000478815	-0.0337944	-0.00540405	-0.000690821	-0.00194723	-0.00695911	-0.00382783	0.00463632	0.0393679	0.0240464	0.00518103	0.00593198	0.00154907	0.0163008	0.00452104
		0	0.0447167	0.0794181	0.0284173	0.0631412	0.132272	0.0498091	0.0108264	0.0272909	0.0771153	0.192606	0.159494	0.0969937	0.0682288	0.0792561	0.0517577	0.014355
		20	0.246955	0.312087	0.165388	0.263768	0.387994	0.225495	0.0986393	0.148328	0.303469	0.428243	0.392035	0.254092	0.257529	0.268002	0.0939587	0.0260594
		40	0.505814	0.562077	0.371106	0.523783	0.63876	0.465182	0.285474	0.353285	0.568589	0.682055	0.599301	0.472722	0.505143	0.502561	0.110061	0.0305254
		60	0.745873	0.766606	0.626997	0.754986	0.825587	0.706244	0.537444	0.591447	0.790947	0.867025	0.760379	0.696343	0.735345	0.723479	0.0889354	0.0246662
		80	0.910402	0.913363	0.852411	0.911203	0.943164	0.879776	0.772151	0.808938	0.932835	0.966227	0.874746	0.860334	0.890872	0.885878	0.0517041	0.0143401
		100	1	0.999997	1	0.985424	0.996362	0.972037	0.921119	0.948589	0.994567	0.999998	0.951788	0.971619	0.971425	0.977918	0.0240345	0.00666598
		120				1	1	1	0.999999	1	1	0.993125	1	1	1	0.999313	0.00206284	0.000652326
		Hv1-A197Anap	ΔpH=1
		Membrane potential (mV)	GNorm_exp_1	GNorm_exp_2	GNorm_exp_3	GNorm_exp_4	GNorm_exp_5	GNorm_exp_6	Average	S.D.	S.E.M.
		-100	5.10957e-05	0.000930592	0.000428046	0.00114338	0.000487685	0.0019111	0.000825318	0.000600336	0.000245086
		-80	-0.000393631	-0.00172435	-0.00260005	-0.00312674	-0.000824584	-0.00521843	-0.00231463	0.00160374	0.000654726
		-60	0.0120399	-0.0501941	0.0668754	-0.0114344	-0.0301865	-0.0200869	-0.00549777	0.0374184	0.015276
		-40	0.000209674	-0.00209168	0.00100784	-0.00147009	-0.00118162	-0.00247586	-0.00100029	0.00123279	0.000503285
		-20	0.00840177	0.0116234	0.00695324	0.0196145	0.0067147	0.00612946	0.00990618	0.00470165	0.00191944
		0	0.128632	0.117821	0.137918	0.230787	0.118133	0.169525	0.150469	0.0399166	0.0162959
		20	0.425333	0.402996	0.45286	0.56499	0.416113	0.528991	0.465214	0.060619	0.0247476
		40	0.668362	0.68285	0.714176	0.810445	0.663789	0.798358	0.722997	0.0598704	0.024442
		60	0.820355	0.866213	0.879034	0.947148	0.818254	0.938546	0.878258	0.0507927	0.020736
		80	0.915975	0.962178	0.961667	0.999996	0.915393	0.996641	0.958642	0.0338298	0.0138109
		100	0.976895	0.999144	0.982512	0.982746	0.973402	0.999999	0.985783	0.0102701	0.00419274
		120	1	1	1	0.944947	1	0.97438	0.986555	0.0208267	0.00850247
		Hv1-L198Anap	ΔpH=1
		Membrane potential (mV)	GNorm_exp_1	GNorm_exp_2	GNorm_exp_3	Average	S.D.	S.E.M.
		-100	0.00151652	0.00141204	-0.00733304	-0.00146816	0.00414732	0.00239445
		-80	-0.00047984	-0.00178833	0.0240841	0.00727196	0.0118999	0.00687044
		-60	-0.197505	-0.116895	-0.125823	-0.146741	0.0360799	0.0208308
		-40	-0.00594423	-0.00406949	0.00505999	-0.00165125	0.00480688	0.00277525
		-20	0.00458931	0.0534666	0.0454588	0.0345049	0.0214046	0.012358
		0	0.119424	0.328673	0.314294	0.25413	0.0954325	0.055098
		20	0.469082	0.66981	0.645121	0.594671	0.0893749	0.0516006
		40	0.737541	0.85725	0.838451	0.811081	0.0525635	0.0303475
		60	0.870905	0.948404	0.905368	0.908226	0.0317031	0.0183038
		80	0.927309	0.983528	1	0.970279	0.0311195	0.0179669
		100	0.957602	0.996611		0.977106	0.0195045	0.0137917
		120	0.974871	1		0.987436	0.0125645	0.00888441
		140	1			1	0	0
		Hv1-G199Anap	ΔpH=1
		Membrane potential (mV)	GNorm_exp_1	GNorm_exp_2	GNorm_exp_3	GNorm_exp_4	GNorm_exp_5	Average	S.D.	S.E.M.
		-100	-0.000391266	0.00313434	0.000501246	-0.000155251	0.00137866	0.000893546	0.00127758	0.000571353
		-80	0.000666652	-0.00712138	-0.0010015	-0.000264974	-0.00167702	-0.00187964	0.00273418	0.00122276
		-60	0.0243786	-0.10648	-0.0241739	0.0368434	-0.120491	-0.0379848	0.0650818	0.0291055
		-40	0.000938703	-0.00561398	-0.0010492	0.000952622	-0.00404455	-0.00176328	0.00265401	0.00118691
		-20	0.0179615	-0.0103654	0.00526691	0.0119817	0.0434517	0.0136593	0.0176439	0.00789057
		0	0.0751918	0.0543729	0.0533357	0.0805661	0.237481	0.100189	0.0695029	0.0310826
		20	0.216338	0.291706	0.268808	0.312609	0.55744	0.32938	0.118456	0.0529752
		40	0.424917	0.624214	0.615457	0.612587	0.804154	0.616266	0.119995	0.0536633
		60	0.6445	0.844898	0.828254	0.796195	0.946241	0.812018	0.0976453	0.0436683
		80	0.811777	0.940373	0.918376	0.892714	1	0.912648	0.0616509	0.0275711
		100	0.913961	0.965864	0.96003	0.941517	0.988794	0.954033	0.0250867	0.0112191
		120	0.975114	0.965664	0.981807	0.972451	0.935082	0.966024	0.016313	0.0072954
		140	1	1	1	1	0.87506	0.975012	0.0499758	0.0223499
		Hv1-L200Anap	ΔpH=1
		Membrane potential (mV)	GNorm_exp_1
		-100	0.00308813
		-80	-0.00603873
		-60	-0.150819
		-40	-0.00659763
		-20	0.0243847
		0	0.283688
		20	0.694284
		40	0.917071
		60	0.991738
		80	1
		100	0.977663
		120	0.941575
		Hv1-L201Anap	ΔpH=1
		Membrane potential (mV)	GNorm_exp_1	GNorm_exp_2	GNorm_exp_3	GNorm_exp_4	Average	S.D.	S.E.M.
		-100		0.0246748	0.00238366	-0.00495971	0.00736625	0.0126008	0.00727508
		-80	0.0103695	-0.0534932	-0.0093425	0.019439	-0.00825679	0.0281136	0.0140568
		-60	-0.514524	-0.944714	0.115891	-0.241136	-0.396121	0.387669	0.193835
		-40	-0.0112787	-0.0470062	0.0312511	0.0779564	0.0127307	0.0467503	0.0233751
		-20	0.460374	0.0875914	0.227122	0.183193	0.23957	0.1371	0.0685498
		0	0.64894	0.337023	0.487868	0.337134	0.452741	0.128922	0.064461
		20	0.795598	0.537767	0.689556	0.4997	0.630655	0.118799	0.0593995
		40	0.898897	0.694798	0.923138	0.660489	0.794331	0.117629	0.0588143
		60	0.959799	0.813181	1	0.791986	0.891241	0.0901023	0.0450512
		80	1	0.892827		0.891241	0.928023	0.0508996	0.0293869
		100		0.946006		0.962062	0.954034	0.00802798	0.00567664
		120		0.974414		1	0.987207	0.0127931	0.00904611
		140		1			1	0	0
		Hv1-I202Anap	ΔpH=1
		Membrane potential (mV)	GNorm_exp_1	GNorm_exp_2	GNorm_exp_3	GNorm_exp_4	Average	S.D.	S.E.M.
		-100	6.70451e-06	-8.43695e-07	3.77916e-06	2.91163e-07	2.48278e-06	2.97373e-06	1.48686e-06
		-80	1.28885e-05	-1.65338e-06	6.75252e-06	7.00269e-07	4.67198e-06	5.64856e-06	2.82428e-06
		-60	-1.97911	-0.836631	-0.377385	-0.506048	-0.924792	0.631338	0.315669
		-40	0.365736	0.414176	0.347616	0.331954	0.36487	0.0308748	0.0154374
		-20	0.654984	0.711826	0.720395	0.659144	0.686588	0.0297147	0.0148574
		0	0.834974	0.886192	0.901947	0.839495	0.865652	0.0290023	0.0145012
		20	0.911135	0.958034	0.964505	0.929323	0.940749	0.0216255	0.0108127
		40	0.962159	0.984781	0.991604	0.975716	0.978565	0.0110218	0.00551089
		60	0.973443	1	1	1	0.993361	0.0114995	0.00574975
		80	0.993856	0.998586	0.99792	0.996611	0.996743	0.00181194	0.000905971
		100	1	0.98554	0.990301	0.969733	0.986394	0.0109397	0.00546987
		120	0.987556		0.986	0.94705	0.973535	0.018739	0.010819

## Sheet: Figure 1E
Figure 1E
Anap and mCherry spectra in Hv1 mutants	Hv1-Q191Anap
Note:	Wavelenght (nm)	Cell_1	Cell_2	Cell_3	Cell_4	Cell_5	Cell_6	Cell_7	Cell_8	Cell_9	Cell_10	Cell_11	Cell_12	Cell_13	Cell_14	Cell_15	Average	S.D.	S.E.M.
SD: Standard deviation	405.929	-0.0024231	0.00268918	0.00202332	0.0105305	-0.00667088	0.00445347	0.00252492	0.00356757	0.00114105	0.000281606	0.00227118	0.00454163	-0.00226846	0.00511664	-0.00259922	0.00167863	0.00395396	0.00102091
S.E.M.: Standard error	406.554	-0.00180999	0.00684121	0.000216784	0.00550403	-0.0172414	-0.000390646	-0.000315603	0.00497297	0.00846492	0.00317169	0.00472851	-0.000933372	0.000829341	0.00127196	0.00173893	0.00113662	0.00573622	0.00148109
	407.179	0.00122613	0.00843318	-0.00158975	0.00457415	-0.00287361	0.00830145	0.000743947	0.00302703	0.00355578	-0.00131906	0.0047161	-0.000341476	0.00192698	0.00115632	0.000988432	0.00216837	0.00321664	0.000830533
	407.805	-0.0055176	0.0086268	0.00144523	0.00640881	-0.0165231	-0.00476598	0.00572613	0.00652249	0.0016452	-0.00173405	0.00476575	0.00537256	0.00265874	0.000260168	0.00111657	0.00106718	0.00615184	0.0015884
	408.43	-0.006481	0.00963794	0.00380579	0.0101284	-0.0258621	0.00179701	0.00209658	0.0106667	0.00501526	0.00108194	0.00165062	0.00228789	0.00107324	0.00699562	0.00763289	0.00210179	0.00863552	0.00222968
	409.055	0.000642232	0.00757267	0.0031313	0.00711253	-0.00964686	0.0033401	-0.00142026	0.00428827	0.00167175	-0.000844795	0.00309029	0.00349444	0.00158547	0.0056659	0.00322155	0.00219364	0.00400715	0.00103464
	409.68	0.00163483	0.00933674	0.00142116	0.00535324	-0.00964702	0.00421908	0.00266019	0.005982	-0.00278625	5.9269e-05	0.00305306	0.00406356	0.000487828	0.00766048	0.00380727	0.00248703	0.00438549	0.00113233
	410.305	0.00472938	0.00432416	-0.000915334	0.00736383	0.00307882	0.00384798	-0.00182605	-7.20541e-05	0.00254743	-0.00183778	0.00292896	0.00237894	-0.00197575	0.00372908	0.00157419	0.00199172	0.00269126	0.000694881
	410.93	0.00788229	0.00585159	0.00645535	0.00851994	-0.00348938	0.00236348	0.00193876	0.00915314	0.00451111	0.00658051	0.00317717	0.00253829	0.000121948	0.00265948	0.00131791	0.00397211	0.00334947	0.000864828
	411.556	-0.00432063	0.00729299	-0.000192685	0.00731358	-0.025041	0.00449253	-0.00369718	0.0151712	0.00119411	0.00174888	0.00435619	0.00372208	0.00295141	0.00812306	0.00611364	0.00194855	0.00859799	0.00221999
	412.181	-0.00735681	0.00563648	0.00474515	0.0065596	-0.0187808	0.00525431	-0.00450876	0.0106666	0.000477644	0.000904086	0.00186162	0.00385867	-0.0015367	0.00896132	0.00397204	0.00138097	0.00709511	0.00183195
	412.806	-0.00735681	0.0120259	-0.000650352	0.00723818	-0.00790225	-0.00392609	0.000225416	0.00533335	0.00108795	0.00177852	0.00537386	0.00380177	-0.00263434	0.00849883	0.00490556	0.0018533	0.00552151	0.00142565
	413.431	-0.00326971	0.0037433	0.00402257	0.00588102	0.00872337	0.00222674	-0.00184861	0.00663059	0.0032108	0.00555786	0.00727273	0.00589616	0.0033661	0.0049432	0.00391713	0.00401822	0.00307336	0.000793539
	414.057	0.00537165	0.00548588	0.00488971	0.00738898	-0.0196018	-0.00250019	0.00189368	0.00634232	0.00148599	0.000711406	0.00604406	0.00504247	-0.00304899	0.0119388	0.00455777	0.00240012	0.00694077	0.0017921
	414.682	-0.00516728	0.0037648	0.00763563	0.00635855	-0.00964702	0.00810611	0.00554579	0.0112072	0.000265371	0.000163023	0.00472851	0.00439366	0.00397591	-0.000144523	0.0017389	0.00286165	0.00511545	0.0013208
	415.307	0.0060723	0.0113805	0.00387801	0.015733	-0.000718442	0.00804751	0.0033365	0.0109189	0.00477644	0.00407576	0.00701211	0.00641974	0.00748833	-0.000115601	0.0038439	0.00614326	0.00415664	0.00107324
	415.932	0.00572198	0.0137254	0.00431158	0.0177939	-0.00389979	0.00390655	0.00818342	0.00605405	0.00467032	0.008196	0.00479056	0.00700025	0.00839085	0.0127772	0.00512521	0.0071165	0.0048417	0.00125012
	416.557	0.00823262	0.0159843	0.00792464	0.0149036	-0.00482343	0.0139269	0.000450866	0.0128649	0.0148601	0.00789957	0.0122991	0.00887837	0.0137327	0.00841211	0.00785254	0.00955992	0.00550499	0.00142138
	417.183	0.00487533	0.0126283	0.0113691	0.0168639	0.0135468	0.0161731	0.00534289	0.0203964	0.00801383	0.0141688	0.0130065	0.0128509	0.00682978	0.0110427	0.0106897	0.0118532	0.00417299	0.00107746
	417.808	-0.00108018	0.0139191	0.00828595	0.0171404	0.0182677	0.0158801	0.00678571	0.0165045	0.0127372	0.0215497	0.0126838	0.01589	0.0051711	0.0231261	0.0089508	0.0130541	0.00625675	0.00161549
	418.433	0.00131372	0.0204806	0.0213412	0.024077	0.00595243	0.0156848	0.00829612	0.0343063	0.0163991	0.0169255	0.02121	0.0154119	0.0125619	0.0256121	0.017206	0.0171186	0.00791815	0.00204446
	419.058	-0.00513807	0.0245896	0.0155602	0.0303853	0.0264778	0.0146496	0.0175842	0.0316757	0.0179116	0.019534	0.0224884	0.021752	0.0180257	0.0274911	0.0125567	0.0197029	0.00864574	0.00223232
	419.683	-0.00207274	0.0204806	0.0263031	0.0357637	0.0259648	0.0201188	0.021056	0.0380541	0.0177789	0.0261294	0.0322557	0.0265099	0.021343	0.036915	0.0181762	0.0243184	0.00960873	0.00248096
	420.308	-0.0107433	0.030936	0.0274593	0.0360653	0.0320197	0.0210954	0.0263763	0.0317838	0.0235372	0.0368449	0.0288923	0.0263164	0.0276118	0.0351806	0.0319959	0.0270248	0.0109878	0.00283704
	420.934	0.00087581	0.0336037	0.0340592	0.0451632	0.0325328	0.0247285	0.0324181	0.0405405	0.0221308	0.0393052	0.0347999	0.0310629	0.0305632	0.0446333	0.0373408	0.0322505	0.0104045	0.00268643
	421.559	-0.00108014	0.0452208	0.0349745	0.0514212	0.0254515	0.0410774	0.0232427	0.0540541	0.0365663	0.0458561	0.0424822	0.0389282	0.0376857	0.0512243	0.0360778	0.0375455	0.0133452	0.00344572
	422.184	-0.0345945	0.0542994	0.0506311	0.053834	0.0302749	0.038128	0.0442761	0.0547388	0.0415284	0.0530294	0.0556128	0.0416828	0.0438569	0.0795248	0.0467126	0.043569	0.0234614	0.00605771
	422.809	-0.0265954	0.0459738	0.0583389	0.0655458	0.0660919	0.0483241	0.0377159	0.0697658	0.0572907	0.0717927	0.0570152	0.0478066	0.0531502	0.0646663	0.059672	0.0517703	0.0228784	0.00590717
	423.435	-0.0335144	0.0679388	0.0591097	0.068813	0.0576766	0.0843621	0.0553	0.0748108	0.0602096	0.0683543	0.0689916	0.0590639	0.0617362	0.0824733	0.062381	0.0598471	0.0263208	0.00679599
	424.06	-0.0317627	0.0686057	0.0719241	0.0800472	0.0571635	0.068521	0.0649714	0.0997117	0.0672947	0.0809817	0.0736581	0.072666	0.0662487	0.0865204	0.086323	0.067525	0.0284573	0.00734764
	424.685	0.00271506	0.0792548	0.079078	0.0920355	0.0894909	0.0767052	0.060147	0.0878559	0.0759188	0.0948838	0.0858083	0.0713912	0.0706393	0.0842945	0.0836323	0.07559	0.0213691	0.00551748
	425.31	-0.0650435	0.0828045	0.0890982	0.102013	0.0995485	0.0931323	0.0837729	0.100721	0.0840387	0.106474	0.102191	0.0935643	0.0807132	0.108143	0.0960609	0.0838154	0.0406913	0.0105065
	425.935	-0.0169615	0.0911731	0.101575	0.102214	0.0904146	0.108466	0.0753415	0.116721	0.106329	0.118153	0.11511	0.0946457	0.0993488	0.101234	0.10902	0.0941856	0.031643	0.0081702
	426.56	-0.0771297	0.0980574	0.108175	0.117243	0.133826	0.119834	0.110082	0.115315	0.110044	0.125311	0.127918	0.100451	0.0931532	0.114676	0.122529	0.101299	0.0489096	0.0126284
	427.186	0.0122906	0.117398	0.116003	0.121767	0.126232	0.129112	0.106723	0.132541	0.128645	0.130454	0.135154	0.119255	0.117643	0.121643	0.138765	0.116908	0.0291134	0.00751704
	427.811	-0.043411	0.105028	0.131058	0.136143	0.160714	0.124033	0.110803	0.146198	0.124373	0.148595	0.142861	0.134997	0.122253	0.140144	0.12932	0.120874	0.046062	0.0118932
	428.436	-0.0782974	0.13861	0.156108	0.145744	0.157841	0.14464	0.131859	0.157874	0.144806	0.1693	0.169457	0.148599	0.136742	0.140144	0.158021	0.134763	0.0579776	0.0149697
	429.061	0.00586793	0.149323	0.152351	0.163035	0.173235	0.152981	0.14162	0.163748	0.157967	0.191205	0.173813	0.15964	0.148889	0.16249	0.170175	0.151089	0.0406003	0.0104829
	429.687	0.0285514	0.176731	0.168826	0.175652	0.174261	0.163196	0.170409	0.18627	0.170678	0.194332	0.176022	0.167038	0.168134	0.176047	0.196515	0.166178	0.0379273	0.00979278
	430.312	0.0096047	0.167696	0.167598	0.193471	0.227833	0.16974	0.180464	0.208144	0.181796	0.210176	0.205659	0.186377	0.17733	0.193074	0.208486	0.179163	0.0485102	0.0125253
	430.937	0.0802242	0.180453	0.187205	0.18573	0.240969	0.173432	0.193449	0.199423	0.193393	0.235357	0.217388	0.198329	0.181794	0.201023	0.218626	0.192453	0.0355408	0.00917659
	431.562	0.0843989	0.195663	0.199513	0.20855	0.241892	0.161028	0.190969	0.204	0.218044	0.251764	0.217412	0.207697	0.206552	0.206285	0.230012	0.201585	0.0375411	0.00969307
	432.187	0.0313248	0.207495	0.214568	0.225866	0.245074	0.206305	0.218337	0.224396	0.221998	0.261709	0.238871	0.210622	0.214357	0.181164	0.260452	0.210836	0.0521289	0.0134596
	432.812	0.0512641	0.199449	0.219072	0.247631	0.234298	0.215583	0.223838	0.235964	0.217354	0.273847	0.260403	0.231987	0.217455	0.221808	0.26759	0.22117	0.049725	0.0128389
	433.438	0.0805161	0.21496	0.237547	0.250924	0.264778	0.236601	0.253799	0.258775	0.241582	0.285511	0.264859	0.255014	0.224797	0.246755	0.257944	0.238291	0.0453343	0.0117053
	434.063	0.0490454	0.231784	0.249735	0.258891	0.266831	0.257735	0.235809	0.271568	0.266631	0.306053	0.279814	0.258156	0.248799	0.250976	0.301966	0.248919	0.0570746	0.0147366
	434.688	0.119081	0.250199	0.246917	0.275076	0.286843	0.265939	0.265927	0.255532	0.261934	0.303148	0.292287	0.251337	0.251189	0.247247	0.299202	0.258124	0.0415298	0.0107229
	435.313	0.0907924	0.268184	0.267511	0.276936	0.295259	0.258243	0.27269	0.283604	0.278599	0.308157	0.299994	0.279373	0.275459	0.290839	0.308372	0.270268	0.0500629	0.0129262
	435.938	0.188941	0.284706	0.284661	0.302018	0.303982	0.290023	0.3302	0.293802	0.29192	0.32655	0.32041	0.30076	0.286972	0.290059	0.307988	0.293533	0.0313745	0.00810087
	436.564	0.165995	0.264075	0.287937	0.303677	0.354988	0.272287	0.304139	0.325586	0.319252	0.354206	0.331976	0.321864	0.294948	0.2948	0.340789	0.302435	0.0449497	0.011606
	437.189	0.216325	0.285933	0.310748	0.331373	0.361556	0.316724	0.326209	0.296036	0.308133	0.360876	0.344611	0.333087	0.315072	0.30564	0.377489	0.319321	0.037051	0.00956653
	437.814	0.255036	0.290687	0.311326	0.338259	0.336104	0.291956	0.303756	0.34573	0.319305	0.374541	0.361415	0.320475	0.319292	0.33394	0.357446	0.323951	0.0300148	0.0077498
	438.439	0.18684	0.340641	0.318046	0.337304	0.353962	0.302739	0.326503	0.346198	0.326231	0.374096	0.342997	0.353291	0.31917	0.314197	0.390778	0.328866	0.0440516	0.0113741
	439.065	0.148829	0.326743	0.337316	0.358441	0.376642	0.342019	0.354773	0.374054	0.349396	0.410467	0.387093	0.370251	0.339879	0.362299	0.398228	0.349095	0.0580962	0.0150004
	439.69	0.184124	0.318396	0.345457	0.381286	0.406507	0.376338	0.340525	0.380108	0.352023	0.394534	0.359479	0.371082	0.369344	0.349319	0.39281	0.354756	0.0508499	0.0131294
	440.315	0.234951	0.371362	0.351334	0.38101	0.410612	0.348504	0.352112	0.408144	0.382752	0.434699	0.396848	0.376352	0.341147	0.333651	0.43037	0.370256	0.0472604	0.0122026
	440.94	0.222193	0.364692	0.36227	0.399633	0.420669	0.388761	0.385319	0.378378	0.377365	0.45278	0.419721	0.394313	0.37454	0.362299	0.424714	0.381843	0.0496501	0.0128196
	441.565	0.231447	0.38556	0.377999	0.403503	0.439758	0.406946	0.392691	0.38836	0.397638	0.451891	0.424437	0.404523	0.38276	0.385483	0.440273	0.394218	0.048906	0.0126275
	442.19	0.278011	0.392982	0.39775	0.405338	0.424364	0.43144	0.411313	0.426631	0.404697	0.475738	0.431437	0.419002	0.410689	0.412916	0.456051	0.411891	0.0414672	0.0107068
	442.816	0.332633	0.412516	0.407289	0.417804	0.468288	0.402649	0.436359	0.418198	0.422927	0.431749	0.481092	0.438717	0.399151	0.425375	0.460774	0.423701	0.0335747	0.00866894
	443.441	0.310183	0.404772	0.41437	0.459851	0.451355	0.429369	0.418707	0.420324	0.431816	0.506669	0.456717	0.433412	0.421421	0.415691	0.484679	0.430623	0.0421702	0.0108883
	444.066	0.34758	0.426823	0.416273	0.437307	0.462644	0.423412	0.447112	0.478811	0.43991	0.470491	0.473683	0.46509	0.426251	0.431446	0.509903	0.443782	0.035831	0.00925152
	444.691	0.360367	0.446486	0.443949	0.461359	0.459565	0.453922	0.453469	0.478162	0.448348	0.517978	0.4869	0.46221	0.417031	0.439771	0.496284	0.455053	0.0348419	0.00899613
	445.317	0.28531	0.443495	0.460955	0.478675	0.499384	0.423471	0.473466	0.460108	0.464588	0.55211	0.514738	0.482608	0.469449	0.459428	0.541294	0.467272	0.0589483	0.0152204
	445.942	0.374321	0.44683	0.453536	0.497198	0.519602	0.418197	0.463479	0.490378	0.486427	0.534992	0.530835	0.482027	0.462863	0.476166	0.511678	0.476569	0.0414905	0.0107128
	446.567	0.379459	0.479294	0.491112	0.498153	0.531815	0.506915	0.52171	0.508108	0.484145	0.546434	0.529047	0.515059	0.454448	0.444772	0.555828	0.49642	0.0433328	0.0111885
	447.192	0.349886	0.49915	0.488896	0.509211	0.55275	0.484862	0.458429	0.529514	0.499987	0.529005	0.517245	0.521365	0.482621	0.509612	0.538036	0.498038	0.0459946	0.0118757
	447.817	0.364775	0.483338	0.509683	0.521803	0.544951	0.540765	0.505726	0.524901	0.501499	0.586036	0.561266	0.549491	0.507793	0.482843	0.59855	0.518895	0.0527808	0.0136279
	448.442	0.351842	0.511284	0.522449	0.545578	0.55665	0.513009	0.542721	0.569297	0.55006	0.571037	0.53843	0.528195	0.524063	0.522591	0.603932	0.530076	0.053424	0.013794
	449.068	0.377211	0.527483	0.511321	0.536178	0.589594	0.539202	0.528383	0.53164	0.502508	0.594232	0.574099	0.556708	0.530234	0.525598	0.617715	0.53614	0.0529569	0.0136734
	449.693	0.364833	0.524278	0.545597	0.576315	0.567837	0.549398	0.536972	0.606919	0.53244	0.593787	0.588917	0.56875	0.527356	0.551759	0.594468	0.548642	0.0553447	0.01429
	450.318	0.439569	0.53981	0.550968	0.569328	0.618432	0.534632	0.543171	0.581081	0.56492	0.615277	0.601775	0.598038	0.549504	0.601972	0.621815	0.568686	0.0452388	0.0116806
	450.943	0.535675	0.547512	0.562843	0.598231	0.623666	0.590398	0.558907	0.551387	0.557251	0.615885	0.617487	0.594953	0.544186	0.52129	0.637667	0.577156	0.0349218	0.00901677
	451.568	0.414784	0.543403	0.578693	0.61047	0.632492	0.549144	0.603995	0.654378	0.594507	0.647291	0.648228	0.589717	0.610996	0.513803	0.657417	0.589955	0.0625668	0.0161547
	452.194	0.388743	0.603102	0.588014	0.611601	0.626334	0.545648	0.582781	0.614955	0.596232	0.647928	0.635061	0.606563	0.593385	0.559969	0.65976	0.590672	0.0614172	0.0158578
	452.819	0.450342	0.581718	0.597745	0.619945	0.653633	0.588405	0.60298	0.636469	0.620804	0.657339	0.64484	0.627279	0.615947	0.559188	0.691646	0.609885	0.0534247	0.0137942
	453.444	0.556198	0.602199	0.612728	0.656061	0.617508	0.562603	0.604626	0.621982	0.639061	0.687574	0.676612	0.638002	0.624412	0.570086	0.661535	0.622079	0.03822	0.00986836
	454.069	0.541076	0.642106	0.632479	0.642137	0.690579	0.594304	0.608188	0.666595	0.626642	0.721262	0.659932	0.642259	0.658365	0.605036	0.714233	0.643013	0.0449709	0.0116114
	454.695	0.469639	0.602758	0.635394	0.663349	0.688834	0.621435	0.65819	0.619063	0.619291	0.688789	0.674204	0.645491	0.621021	0.610846	0.736857	0.637011	0.0571208	0.0147485
	455.32	0.656157	0.649442	0.639633	0.689336	0.688629	0.570552	0.664863	0.683748	0.652249	0.707301	0.702104	0.659389	0.646389	0.609834	0.733252	0.663525	0.0389543	0.010058
	455.945	0.431862	0.662113	0.660492	0.676971	0.701663	0.634796	0.643875	0.669189	0.667772	0.70776	0.727806	0.698602	0.649023	0.660394	0.735119	0.661829	0.0679204	0.017537
	456.57	0.551702	0.668201	0.671572	0.715801	0.737685	0.611356	0.672415	0.712865	0.710707	0.760716	0.684071	0.690122	0.670171	0.638251	0.704312	0.679997	0.0497575	0.0128473
	457.195	0.61368	0.675516	0.68022	0.714444	0.673338	0.68142	0.691961	0.720252	0.685047	0.738217	0.734161	0.708505	0.659634	0.633336	0.738084	0.689854	0.0356694	0.0092098
	457.82	0.63975	0.736054	0.69313	0.734449	0.728551	0.694058	0.704924	0.744793	0.699774	0.73466	0.733031	0.722733	0.679464	0.648715	0.725381	0.707965	0.031197	0.00805502
	458.446	0.633094	0.70884	0.702259	0.730604	0.746716	0.668978	0.696673	0.711892	0.713653	0.765369	0.746621	0.747297	0.702807	0.62981	0.759152	0.710918	0.0402568	0.0103943
	459.071	0.625971	0.725663	0.730706	0.732539	0.771141	0.655872	0.712814	0.745622	0.769033	0.746176	0.768092	0.727514	0.715979	0.682103	0.79221	0.726762	0.0432209	0.0111596
	459.696	0.710983	0.741626	0.717747	0.754731	0.784893	0.718709	0.720231	0.75827	0.756826	0.761175	0.778703	0.731964	0.753153	0.693984	0.853511	0.7491	0.0373961	0.00965564
	460.321	0.573743	0.737474	0.733235	0.765815	0.811166	0.752227	0.793273	0.746342	0.755473	0.794404	0.776767	0.756687	0.766934	0.714046	0.80235	0.751996	0.0544118	0.0140491
	460.947	0.730572	0.706667	0.740221	0.797507	0.794848	0.740527	0.711236	0.803856	0.729176	0.814145	0.788843	0.776538	0.770959	0.762206	0.795376	0.764178	0.0341615	0.00882045
	461.572	0.774859	0.727814	0.764235	0.790344	0.819376	0.758028	0.762703	0.751604	0.759188	0.794004	0.774124	0.77112	0.753884	0.716099	0.808702	0.768406	0.0265323	0.0068506
	462.197	0.617213	0.784007	0.771992	0.780291	0.844417	0.687261	0.777605	0.795135	0.787449	0.835117	0.792454	0.805131	0.733932	0.705403	0.82686	0.769618	0.0587145	0.01516
	462.822	0.648596	0.771874	0.785336	0.822589	0.8125	0.747402	0.801885	0.822631	0.7987	0.799532	0.804716	0.817527	0.792424	0.724887	0.874304	0.788327	0.049924	0.0128903
	463.447	0.676126	0.761526	0.803208	0.811983	0.825123	0.790531	0.794896	0.826883	0.784477	0.843194	0.82085	0.82521	0.801059	0.723297	0.88115	0.797967	0.047633	0.0122988
	464.072	0.685555	0.813997	0.792249	0.834804	0.808806	0.763868	0.813337	0.80591	0.790819	0.808839	0.840075	0.828329	0.828231	0.72665	0.853108	0.799638	0.0429941	0.011101
	464.698	0.761254	0.804703	0.838062	0.81804	0.84647	0.781585	0.782294	0.83391	0.792995	0.808928	0.829364	0.837378	0.839671	0.827913	0.865097	0.817844	0.0276429	0.00713737
	465.323	0.766772	0.804703	0.808604	0.81892	0.857348	0.784788	0.852541	0.87773	0.826934	0.854399	0.867316	0.850934	0.851257	0.758911	0.88752	0.831245	0.038317	0.00989341
	465.948	0.65461	0.795839	0.844686	0.833271	0.90312	0.724275	0.836602	0.875423	0.813931	0.865248	0.874949	0.844629	0.848745	0.761802	0.886934	0.824271	0.0644323	0.0166363
	466.573	0.923863	0.826646	0.837268	0.845711	0.834668	0.814146	0.872402	0.873369	0.831737	0.851123	0.848154	0.864981	0.827719	0.831295	0.870607	0.850246	0.0265618	0.00685822
	467.199	0.804432	0.821741	0.84565	0.86911	0.852114	0.869795	0.82914	0.892901	0.857928	0.886131	0.866559	0.875464	0.867454	0.812766	0.892828	0.856267	0.0272739	0.00704209
	467.824	0.798039	0.835209	0.851286	0.851165	0.857246	0.792015	0.823098	0.925117	0.859812	0.898165	0.879268	0.879869	0.839964	0.85075	0.902621	0.856242	0.0357339	0.00922645
	468.449	0.776523	0.824344	0.866124	0.867928	0.934832	0.820259	0.892759	0.895712	0.865092	0.85594	0.896544	0.885583	0.882138	0.770792	0.912176	0.863116	0.0454055	0.0117237
	469.074	0.719186	0.85143	0.873904	0.898942	0.88321	0.881709	0.922562	0.926667	0.850285	0.875993	0.891716	0.885298	0.84833	0.867228	0.895885	0.87149	0.0465276	0.0120134
	469.699	0.671717	0.874535	0.889512	0.869084	0.863814	0.830377	0.863249	0.918631	0.884914	0.877297	0.899274	0.910408	0.874454	0.828058	0.932219	0.865836	0.0588176	0.0151866
	470.325	0.80195	0.838608	0.924366	0.861143	0.940784	0.801781	0.926913	0.964613	0.877829	0.895571	0.904486	0.900016	0.90231	0.898361	0.932512	0.891416	0.0463227	0.0119605
	470.95	0.804373	0.842351	0.87954	0.914147	0.925185	0.930991	0.907097	0.972108	0.865543	0.914883	0.930996	0.906128	0.893187	0.884688	0.952464	0.901579	0.0410968	0.0106112
	471.575	0.908419	0.889723	0.9103	0.916535	0.898912	0.79053	0.889265	0.903568	0.865994	0.934328	0.979696	0.911888	0.923482	0.83725	0.928632	0.899235	0.042266	0.010913
	472.2	0.807264	0.88854	0.932749	0.92704	0.910407	0.876221	0.915122	0.909802	0.919862	0.933973	0.936953	0.909907	0.935288	0.864944	0.935953	0.906935	0.0342455	0.00884214
	472.825	0.782858	0.907751	0.915912	0.923421	0.94725	0.911106	0.902475	0.933189	0.899164	0.907443	0.92865	0.932718	0.899529	0.888908	0.958815	0.909279	0.0385452	0.00995233
	473.45	0.762101	0.942151	0.917237	0.922818	0.922003	0.872158	0.900897	0.962126	0.923471	0.932817	0.9113	0.935598	0.897944	0.923539	0.987443	0.91424	0.0482466	0.0124572
	474.076	0.915222	0.943786	0.925161	0.941944	0.909175	0.809634	0.908427	1	0.905559	0.915269	0.94641	0.943156	0.929531	0.899951	0.959438	0.923511	0.0393755	0.0101667
	474.701	0.865388	0.950799	0.918706	0.911533	0.889265	0.875439	0.923847	0.964685	0.944142	0.957242	0.945889	0.946297	0.93941	0.881363	0.953415	0.924495	0.0315815	0.00815431
	475.326	0.831494	0.927371	0.937542	0.947473	0.918001	0.851824	0.912147	0.908613	0.865782	0.917922	0.937326	0.944203	0.938483	0.851502	0.989951	0.911976	0.0420984	0.0108698
	475.951	0.871781	0.928727	0.933327	0.943653	0.962541	0.880088	0.938906	0.953189	0.916253	0.917003	0.981868	0.948232	0.937459	0.862949	0.902456	0.925229	0.0327668	0.00846034
	476.577	0.833217	0.917669	0.960232	0.956697	0.922004	0.840046	0.918752	0.961405	0.979647	0.927451	0.977847	0.963792	0.925165	0.89813	0.943751	0.928387	0.042822	0.0110566
	477.202	0.807789	0.905858	0.957534	0.941592	0.876334	0.884132	0.95782	0.98382	0.911132	0.907325	0.93884	0.954652	0.948557	0.850953	0.946826	0.918211	0.0457622	0.0118157
	477.827	0.792492	0.938322	0.924921	0.964538	0.933498	0.8403	0.952094	0.92782	0.925222	0.949727	0.969383	1	0.92658	0.865985	0.962202	0.924872	0.0518735	0.0133937
	478.452	0.838355	0.944582	0.976804	0.948629	0.957615	0.875967	0.925763	0.978775	0.939897	0.958131	0.978256	0.95661	0.964851	0.870147	0.940639	0.937001	0.0410927	0.0106101
	479.077	0.856893	0.950993	0.974371	0.973008	0.950329	1	0.924681	0.965225	0.969696	0.912823	0.975787	0.979261	0.945874	0.889891	0.948437	0.947818	0.0365318	0.00943246
	479.702	0.986046	0.984403	0.967338	0.962527	0.930214	0.858993	0.947653	0.934667	0.959772	0.925465	0.987837	0.994798	1	0.889082	0.999396	0.955213	0.0401947	0.0103782
	480.328	0.833158	0.917454	0.957751	0.943929	0.992303	0.907454	0.921953	0.980108	0.947273	1	0.963574	0.961379	0.960241	0.909751	0.927552	0.941592	0.0400755	0.0103475
	480.953	0.896888	0.938085	0.963195	0.96876	0.92775	0.903235	1	0.977694	0.963115	0.887524	0.984859	0.963542	0.99617	0.894285	0.998334	0.950896	0.0387055	0.00999372
	481.578	0.781456	0.974249	0.968687	0.94496	1	0.897453	0.962194	0.985297	0.972827	0.960813	0.960956	0.986421	0.979194	0.877808	0.96405	0.947758	0.054342	0.0140311
	482.203	0.863636	0.95934	0.966856	0.98673	0.987685	0.939917	0.956626	0.940396	0.952899	0.947741	0.950394	0.975038	0.973949	0.880756	0.937052	0.947934	0.033615	0.00867937
	482.829	0.824692	0.961147	0.976443	0.952273	0.915127	0.895422	0.950742	0.95964	0.949582	0.949609	0.95264	0.979591	0.981389	1	0.954056	0.946824	0.0408676	0.010552
	483.454	0.865096	0.942431	0.988029	0.990977	0.994561	0.926342	0.960526	0.971784	0.965583	0.910244	0.979783	0.96682	0.976608	0.982627	0.939248	0.957377	0.0342414	0.00884108
	484.079	0.825393	0.910354	0.97996	0.978663	0.899323	0.854832	0.935705	0.980865	0.956932	0.91595	1	0.96493	0.992756	0.910358	0.98834	0.939624	0.0508494	0.0131293
	484.704	0.924272	0.957813	0.982681	0.984518	0.92303	0.875049	0.925628	0.970631	0.989916	0.975175	0.978033	0.983325	0.974218	0.855491	0.952299	0.950138	0.0399952	0.0103267
	485.329	0.799615	1	0.983597	1	0.950123	0.946148	0.944226	0.954991	0.962133	0.926177	0.960931	0.996688	0.999439	0.911601	0.938369	0.951603	0.0488855	0.0126222
	485.954	0.785251	0.953811	0.956523	0.976778	0.922927	0.932964	0.893773	0.927496	0.924214	0.95112	0.968452	0.977133	0.988609	0.887578	0.984954	0.935439	0.0501854	0.0129578
	486.58	0.876394	0.991976	0.985789	0.971072	0.868637	0.804301	0.897358	0.950883	0.974579	0.906954	0.938715	0.965488	0.952582	0.91929	0.913988	0.927867	0.0498315	0.0128664
	487.205	0.985316	0.917819	0.973071	0.962553	0.965928	0.869365	0.948284	0.933333	0.97036	0.957657	0.948172	0.997689	0.96368	0.910155	0.95876	0.95081	0.0311999	0.00805577
	487.83	0.912653	0.996235	0.967338	0.949358	0.883108	0.927104	0.883764	0.954847	0.929494	0.916291	0.958821	0.996187	0.965241	0.891712	0.943238	0.938359	0.0352645	0.00910525
	488.455	0.760875	0.950821	0.975744	0.957978	0.970957	0.915111	0.95401	0.922991	0.994958	0.929615	0.94121	0.974719	0.977535	0.92591	1	0.943496	0.0549099	0.0141777
	489.08	0.848047	0.909171	0.980634	0.977255	0.879824	0.919642	0.918436	0.953081	0.961868	0.877549	0.970748	0.967765	0.967924	0.888619	0.924605	0.929678	0.0410445	0.0105976
	489.706	0.789572	0.946712	0.956161	0.936565	0.913998	0.797484	0.93566	0.956	0.934855	0.89901	0.959106	0.996608	0.98056	0.882693	0.944099	0.921939	0.0574673	0.014838
	490.331	0.60647	0.918121	1	0.95074	0.980193	0.828131	0.939966	0.967892	1	0.92216	0.942836	0.960844	0.943045	0.920013	0.904964	0.919025	0.0930027	0.0240132
	490.956	0.840603	0.930749	0.968976	0.914901	0.947044	0.819556	0.896614	0.958018	0.936049	0.886827	0.928328	0.958886	0.96812	0.954528	0.947357	0.92377	0.0436952	0.0112821
	491.581	0.742745	0.941376	0.998218	0.935007	0.921285	0.780803	0.938793	0.932	0.935943	0.893971	0.962631	0.964407	0.967461	0.899373	0.925813	0.915988	0.0659724	0.017034
	492.207	0.782157	0.923284	0.948694	0.949986	0.902196	0.858231	0.893232	0.943784	0.943479	0.875608	0.923835	0.949427	0.962095	0.902755	0.904012	0.910852	0.0451817	0.0116659
	492.832	0.828195	0.940516	0.948839	0.948051	0.871408	0.9122	0.926981	0.885153	0.920499	0.933869	0.904065	0.959456	0.95829	0.903796	0.907472	0.916586	0.0345124	0.00891107
	493.457	0.619402	0.892025	0.939493	0.913368	0.914922	0.837702	0.893345	0.898378	0.960966	0.853613	0.906634	0.934437	0.929556	0.808892	0.926417	0.881943	0.0803192	0.0207383
	494.082	0.744235	0.946927	0.934314	0.907537	0.84883	0.872431	0.905158	0.942955	0.958631	0.931171	0.931244	0.937874	0.930092	0.893447	0.939102	0.908263	0.052423	0.0135355
	494.707	0.772027	0.896177	0.952862	0.91191	0.844212	0.823365	0.891451	0.97236	0.959904	0.882662	0.914217	0.962483	0.943362	0.855202	0.907307	0.8993	0.0551065	0.0142284
	495.332	1	0.922509	0.933688	0.879037	0.893781	0.884346	0.860228	0.955928	0.907072	0.885849	0.934173	0.92804	0.937727	0.845749	0.88893	0.91047	0.0384043	0.00991595
	495.958	0.861856	0.877869	0.938433	0.889266	0.781096	0.846004	0.885297	0.938667	0.897837	0.869353	0.908024	0.919423	0.931678	0.947562	0.893817	0.892412	0.0417356	0.0107761
	496.583	0.814504	0.909795	0.949056	0.889517	0.889676	0.807622	0.889896	0.884937	0.907072	0.816961	0.92654	0.91833	0.902773	0.862689	0.880253	0.883308	0.0404043	0.0104323
	497.208	0.773486	0.956565	0.944913	0.904672	0.871203	0.855458	0.863565	0.900469	0.876237	0.840808	0.899919	0.925661	0.877747	0.851646	0.901505	0.882924	0.0436453	0.0112692
	497.833	0.838121	0.831853	0.935615	0.876423	0.845033	0.827291	0.868975	0.914883	0.908399	0.803711	0.839342	0.931045	0.88004	0.903333	0.853035	0.870473	0.0394228	0.0101789
	498.459	0.760612	0.913624	0.936795	0.866471	0.840004	0.794769	0.915213	0.902919	0.852329	0.832582	0.856966	0.932183	0.923775	0.904027	0.833358	0.871042	0.0510915	0.0131918
	499.084	0.538244	0.882796	0.921428	0.86162	0.798338	0.801	0.81762	0.853153	0.877352	0.836347	0.880956	0.909042	0.889504	0.93464	0.900004	0.846803	0.0916818	0.0236721
	499.709	0.668331	0.886238	0.916803	0.858051	0.761289	0.791488	0.846386	0.900721	0.846729	0.805771	0.876848	0.910124	0.888919	0.861677	0.855524	0.844993	0.06342	0.016375
	500.334	0.86822	0.83523	0.927715	0.867024	0.815271	0.760391	0.814892	0.876396	0.839565	0.860298	0.888737	0.887814	0.922336	0.857341	0.793692	0.854328	0.0442462	0.0114243
	500.959	0.729404	0.847966	0.908565	0.861721	0.803058	0.753145	0.81611	0.892865	0.857476	0.775581	0.845461	0.876784	0.903164	0.818518	0.831289	0.834741	0.0514406	0.0132819
	501.584	0.566766	0.822086	0.919116	0.849104	0.766626	0.799223	0.810451	0.833874	0.844288	0.802763	0.869724	0.867075	0.910018	0.875726	0.779726	0.821104	0.0803139	0.020737
	502.21	0.682052	0.835058	0.894474	0.849757	0.788075	0.756407	0.783444	0.831063	0.848773	0.773076	0.845138	0.88564	0.912872	0.788975	0.823364	0.819878	0.0576076	0.0148742
	502.835	0.60609	0.836951	0.864149	0.836864	0.805316	0.785296	0.819672	0.79009	0.824254	0.772795	0.839094	0.879243	0.90692	0.802012	0.779506	0.809883	0.0656745	0.0169571
	503.46	0.67198	0.888303	0.859669	0.824499	0.816092	0.764376	0.749515	0.785982	0.861589	0.802777	0.814744	0.853598	0.872113	0.784697	0.79587	0.80972	0.0538799	0.0139117
	504.085	0.698722	0.797517	0.896064	0.794315	0.78438	0.758985	0.791041	0.804973	0.77158	0.777196	0.824908	0.84892	0.840866	0.804556	0.798506	0.799502	0.0428843	0.0110727
	504.711	0.666696	0.830755	0.864245	0.809772	0.737685	0.722791	0.757022	0.812252	0.814754	0.769445	0.782104	0.841635	0.866698	0.745816	0.768597	0.786018	0.0538043	0.0138922
	505.336	0.56154	0.839081	0.872892	0.795069	0.745177	0.716892	0.800374	0.836468	0.780417	0.778767	0.788756	0.861554	0.887845	0.786113	0.779909	0.788724	0.0757744	0.0195649
	505.961	0.676943	0.854764	0.848878	0.788208	0.695402	0.732499	0.765747	0.804072	0.832453	0.706263	0.799168	0.833815	0.816572	0.797618	0.739804	0.77948	0.0553348	0.0142874
	506.586	0.508291	0.813502	0.833317	0.795924	0.752155	0.747695	0.743473	0.751459	0.756587	0.751645	0.802966	0.826394	0.847111	0.772584	0.716979	0.761339	0.0771799	0.0199278
	507.211	0.645064	0.821935	0.785215	0.767147	0.715004	0.746894	0.71987	0.808793	0.827942	0.687174	0.744822	0.844367	0.822646	0.728934	0.719999	0.759054	0.0563707	0.0145549
	507.837	0.601069	0.747607	0.815734	0.763955	0.75195	0.731542	0.688512	0.691568	0.783017	0.773047	0.768104	0.814602	0.799668	0.780909	0.738779	0.750004	0.0541062	0.0139702
	508.462	0.47971	0.782135	0.798415	0.750459	0.683395	0.637179	0.690766	0.763423	0.742524	0.742575	0.770226	0.795411	0.796107	0.69225	0.710865	0.722363	0.0797515	0.0205918
	509.087	0.551819	0.780178	0.799186	0.736284	0.720443	0.691148	0.668245	0.783964	0.703887	0.678044	0.767645	0.786976	0.788985	0.748533	0.710792	0.727742	0.0630233	0.0162725
	509.712	0.650698	0.775595	0.800703	0.752218	0.694684	0.589343	0.722733	0.713297	0.760409	0.665106	0.711375	0.786965	0.771935	0.761137	0.714252	0.724697	0.0556811	0.0143768
	510.337	0.514889	0.77581	0.753589	0.731911	0.648296	0.745781	0.696717	0.723063	0.711238	0.686922	0.710344	0.762379	0.721809	0.705518	0.701036	0.705954	0.0597139	0.0154181
	510.962	0.395341	0.795646	0.755396	0.729197	0.647373	0.621201	0.704811	0.747171	0.74722	0.677096	0.715545	0.754229	0.773276	0.765993	0.691591	0.701406	0.0940978	0.024296
	511.588	0.497139	0.76486	0.78418	0.705798	0.70936	0.720838	0.716105	0.674955	0.696617	0.671064	0.754763	0.737143	0.750713	0.715376	0.627013	0.701728	0.0669356	0.0172827
	512.213	0.491826	0.693479	0.761514	0.706175	0.601293	0.707086	0.704698	0.692108	0.72631	0.690316	0.671486	0.753682	0.724297	0.656491	0.654195	0.682331	0.0640092	0.0165271
	512.838	0.529778	0.723533	0.739209	0.680515	0.616482	0.753399	0.650796	0.744072	0.670877	0.68292	0.717481	0.749437	0.695344	0.726997	0.658076	0.689261	0.0579104	0.0149524
	513.463	0.400625	0.737259	0.735042	0.669708	0.635879	0.711911	0.627666	0.705405	0.674486	0.636412	0.65292	0.708733	0.702612	0.729801	0.662524	0.666065	0.0794512	0.0205142
	514.088	0.488294	0.717875	0.717001	0.667672	0.596983	0.603426	0.665855	0.672541	0.661643	0.644949	0.677083	0.744394	0.737664	0.705779	0.622547	0.66158	0.063582	0.0164168
	514.714	0.52137	0.695953	0.698478	0.65963	0.646039	0.643957	0.688692	0.695063	0.650498	0.626215	0.686106	0.701789	0.704222	0.687451	0.60794	0.660894	0.047303	0.0122136
	515.339	0.394436	0.669191	0.741714	0.664505	0.658559	0.667181	0.668515	0.645802	0.613507	0.650774	0.651108	0.701357	0.701661	0.634203	0.606439	0.644597	0.074557	0.0192505
	515.964	0.456093	0.695889	0.706041	0.622408	0.64532	0.555708	0.585035	0.638342	0.64941	0.684343	0.621359	0.715426	0.676196	0.682508	0.605817	0.635993	0.0652737	0.0168536
	516.589	0.436241	0.672784	0.708787	0.62369	0.576971	0.546996	0.635984	0.645189	0.615709	0.630854	0.646814	0.705739	0.681684	0.599948	0.589197	0.621106	0.0662647	0.0171095
	517.215	0.507561	0.650948	0.685254	0.612481	0.633005	0.601883	0.565467	0.622883	0.653974	0.604532	0.615625	0.672946	0.650413	0.628769	0.582937	0.619245	0.0431873	0.0111509
	517.84	0.377153	0.627283	0.699128	0.613285	0.592673	0.631514	0.557013	0.628721	0.645801	0.618093	0.595433	0.695734	0.641096	0.665077	0.574242	0.610816	0.0732898	0.0189233
	518.465	0.384685	0.641245	0.653531	0.625877	0.54218	0.544574	0.606249	0.62836	0.614621	0.590645	0.629774	0.638776	0.635973	0.667592	0.604316	0.60056	0.067044	0.0173107
	519.09	0.460559	0.653916	0.659529	0.600694	0.567016	0.607665	0.574011	0.629189	0.587236	0.607704	0.596835	0.641917	0.64173	0.631746	0.539629	0.599958	0.0496334	0.0128153
	519.715	0.490658	0.647893	0.641945	0.582925	0.571223	0.529006	0.585148	0.593946	0.614329	0.552748	0.576407	0.644	0.630631	0.622814	0.549806	0.588899	0.0443367	0.0114477
	520.341	0.393239	0.622873	0.64433	0.574958	0.556342	0.611532	0.520335	0.589261	0.5663	0.591593	0.578703	0.622817	0.61846	0.63033	0.56844	0.579301	0.0590914	0.0152573
	520.966	0.482426	0.616785	0.628601	0.594511	0.526991	0.563892	0.546102	0.609189	0.621388	0.555312	0.582687	0.619414	0.654902	0.654005	0.543985	0.586679	0.04769	0.0123135
	521.591	0.401034	0.607211	0.634406	0.573148	0.545977	0.559028	0.525384	0.557045	0.619663	0.559328	0.576593	0.61164	0.640022	0.570202	0.531923	0.567507	0.0563121	0.0145397
	522.216	0.249664	0.576125	0.600491	0.563648	0.547824	0.526272	0.539993	0.558595	0.599257	0.542284	0.543754	0.583946	0.598117	0.589599	0.49665	0.541081	0.0830963	0.0214554
	522.841	0.362848	0.594368	0.607717	0.543115	0.485735	0.537874	0.539001	0.554162	0.572827	0.55669	0.551548	0.578608	0.568651	0.589165	0.493227	0.542369	0.0579692	0.0149676
	523.466	0.419134	0.563561	0.607669	0.522305	0.465825	0.539476	0.582533	0.532396	0.559108	0.531346	0.525858	0.585062	0.573505	0.536409	0.517902	0.537473	0.0459156	0.0118554
	524.092	0.332545	0.519911	0.589797	0.530951	0.540025	0.558266	0.52951	0.516072	0.548468	0.567035	0.534769	0.5699	0.577701	0.530859	0.521929	0.531182	0.0573923	0.0148186
	524.717	0.15461	0.594626	0.563156	0.506447	0.482964	0.509415	0.50399	0.495964	0.572589	0.518215	0.501458	0.53944	0.573896	0.503426	0.480799	0.500066	0.0985526	0.0254462
	525.342	0.534478	0.551083	0.568335	0.504134	0.460489	0.557973	0.517877	0.483784	0.501765	0.52232	0.514936	0.540499	0.554723	0.519238	0.468334	0.519998	0.0313294	0.00808921
	525.967	0.358382	0.557064	0.570238	0.507251	0.441092	0.622275	0.485617	0.441333	0.556667	0.483445	0.501074	0.542491	0.532941	0.524846	0.46643	0.506076	0.0621479	0.0160465
	526.592	0.421674	0.536196	0.559591	0.524467	0.469622	0.471717	0.47536	0.505874	0.500889	0.457479	0.484642	0.524541	0.574432	0.568323	0.447393	0.50148	0.044384	0.0114599
	527.218	0.339318	0.472345	0.554389	0.48247	0.434216	0.495332	0.476847	0.470378	0.51153	0.459939	0.488129	0.52478	0.531234	0.535571	0.458632	0.482341	0.0499192	0.0128891
	527.843	0.2835	0.503109	0.540804	0.481917	0.425493	0.489863	0.471369	0.459496	0.521003	0.449372	0.467676	0.540954	0.48567	0.508687	0.450322	0.471949	0.0598111	0.0154432
	528.468	0.192795	0.500377	0.515271	0.468195	0.410407	0.432475	0.419406	0.494703	0.52164	0.48266	0.46394	0.529583	0.529185	0.481543	0.42574	0.457861	0.0807243	0.0208429
	529.093	0.33564	0.488824	0.522594	0.474026	0.409893	0.539105	0.468146	0.479892	0.531909	0.455374	0.456395	0.493671	0.512745	0.563206	0.455777	0.479146	0.054119	0.0139735
	529.718	0.385327	0.47867	0.502915	0.4786	0.452176	0.500469	0.492628	0.461225	0.460608	0.450572	0.489122	0.517393	0.504208	0.543578	0.386605	0.473606	0.0421568	0.0108848
	530.344	0.174987	0.461244	0.530928	0.447586	0.364429	0.428295	0.456378	0.463243	0.45814	0.45281	0.439379	0.511052	0.47423	0.503686	0.444922	0.440754	0.0801874	0.0207043
	530.969	0.340603	0.443775	0.482802	0.448139	0.414922	0.429916	0.42441	0.417081	0.478413	0.457731	0.441092	0.482027	0.477571	0.490966	0.40846	0.442527	0.0380848	0.00983344
	531.594	0.423221	0.46744	0.487427	0.448466	0.408867	0.460583	0.398012	0.416216	0.450206	0.437381	0.44139	0.481447	0.49467	0.487411	0.36043	0.444211	0.0367059	0.00947743
	532.219	0.251182	0.432739	0.489378	0.41416	0.391113	0.41177	0.435682	0.440216	0.435505	0.377401	0.42471	0.462563	0.491768	0.456335	0.374286	0.419254	0.0562773	0.0145307
	532.845	0.185701	0.457651	0.461894	0.432909	0.369253	0.460427	0.374837	0.384	0.463341	0.429808	0.415724	0.452193	0.443764	0.469546	0.376867	0.411861	0.0696162	0.0179748
	533.47	0.269283	0.431685	0.487017	0.423383	0.380337	0.432866	0.412823	0.385514	0.465119	0.392103	0.414235	0.459262	0.488011	0.49247	0.365848	0.419997	0.0562927	0.0145347
	534.095	0.256175	0.429835	0.461075	0.41715	0.373666	0.447945	0.3871	0.401982	0.425581	0.446496	0.404158	0.44451	0.434812	0.455034	0.385818	0.411422	0.0490321	0.01266
	534.72	0.287849	0.431125	0.428365	0.390208	0.367714	0.441187	0.398124	0.394451	0.421016	0.41146	0.389054	0.430134	0.443886	0.433845	0.423982	0.40616	0.0382085	0.0098654
	535.345	0.197291	0.433771	0.435519	0.389982	0.316605	0.454977	0.373326	0.418234	0.405281	0.399084	0.41179	0.433481	0.456838	0.479548	0.381626	0.399157	0.0662262	0.0170995
	535.971	0.212442	0.384764	0.42586	0.383071	0.307061	0.404231	0.353082	0.340865	0.391217	0.361765	0.384747	0.421244	0.415543	0.431764	0.362462	0.372008	0.0540669	0.01396
	536.596	0.17271	0.415657	0.433014	0.388323	0.367098	0.415267	0.369764	0.359063	0.419902	0.37872	0.367695	0.394643	0.427129	0.39482	0.33301	0.375788	0.0607816	0.0156937
	537.221	0.265487	0.425123	0.408132	0.380507	0.345443	0.446441	0.349587	0.369586	0.391588	0.380573	0.371778	0.399048	0.443618	0.427081	0.332626	0.382441	0.0458743	0.0118447
	537.846	0.147954	0.381236	0.413238	0.37058	0.322352	0.411712	0.354344	0.370595	0.359268	0.401352	0.388384	0.399424	0.409249	0.391871	0.323638	0.363013	0.0639241	0.0165051
	538.471	0.168944	0.390121	0.4083	0.379049	0.313937	0.43521	0.353194	0.330559	0.371129	0.354354	0.357419	0.381337	0.397736	0.421328	0.3152	0.358521	0.0614134	0.0158569
	539.096	-0.000700692	0.388163	0.381323	0.351228	0.33867	0.421654	0.384666	0.35809	0.391721	0.323304	0.345045	0.385367	0.414201	0.459833	0.312619	0.350346	0.101084	0.0260997
	539.722	0.138465	0.403416	0.396329	0.339038	0.27853	0.387726	0.308535	0.340793	0.368343	0.319155	0.347267	0.369818	0.370686	0.391524	0.296969	0.337106	0.0644778	0.0166481
	540.347	0.194079	0.381064	0.384719	0.331448	0.270115	0.360438	0.336918	0.330487	0.376304	0.349893	0.33287	0.38004	0.356929	0.403434	0.325432	0.340945	0.050354	0.0130013
	540.972	0.075349	0.348988	0.391126	0.335972	0.316913	0.380479	0.31505	0.305477	0.340693	0.320489	0.345678	0.375475	0.380394	0.391409	0.310349	0.328923	0.0738114	0.019058
	541.597	0.252408	0.357098	0.372459	0.330292	0.288075	0.411653	0.33286	0.315099	0.332122	0.311714	0.313087	0.370524	0.365637	0.371462	0.31908	0.336238	0.038301	0.00988928
	542.222	0.0649267	0.350451	0.370965	0.317274	0.286535	0.348543	0.323617	0.301946	0.345787	0.301547	0.331455	0.372869	0.336854	0.378458	0.276193	0.313828	0.0729607	0.0188384
	542.848	0.224032	0.345589	0.362655	0.315162	0.295669	0.355106	0.318206	0.322306	0.330927	0.289942	0.308793	0.339427	0.369027	0.453011	0.284229	0.327606	0.0486989	0.012574
	543.473	0.0841361	0.333864	0.367352	0.311619	0.262726	0.349637	0.306326	0.297694	0.313653	0.31459	0.30229	0.36654	0.35027	0.378863	0.315236	0.31032	0.0675904	0.0174518
	544.098	0.201524	0.301874	0.346589	0.291538	0.294438	0.382901	0.31212	0.31009	0.361444	0.257885	0.325349	0.318437	0.346806	0.452115	0.2731	0.318414	0.055734	0.0143904
	544.723	0.111666	0.341243	0.353671	0.297947	0.248255	0.38251	0.313991	0.302775	0.319066	0.303385	0.290437	0.327031	0.348343	0.365247	0.289427	0.306333	0.061669	0.0159229
	545.348	0.149472	0.327216	0.336232	0.285682	0.243637	0.342214	0.263988	0.282955	0.333289	0.328077	0.27588	0.331174	0.31134	0.307143	0.259408	0.291847	0.0488152	0.012604
	545.974	0.0636131	0.331648	0.326838	0.281987	0.251129	0.40093	0.331327	0.286342	0.292132	0.271431	0.281986	0.325643	0.312535	0.328795	0.24914	0.289032	0.0708505	0.0182935
	546.599	0.105652	0.292494	0.341627	0.278946	0.209052	0.352918	0.277537	0.266703	0.272602	0.27355	0.278697	0.30232	0.311681	0.320209	0.283442	0.277829	0.0565944	0.0146126
	547.224	0.106907	0.286728	0.326501	0.281284	0.300493	0.345672	0.270481	0.235099	0.300332	0.276115	0.257574	0.31961	0.320048	0.309282	0.265559	0.280112	0.0542708	0.0140127
	547.849	0.0553221	0.302992	0.323177	0.261932	0.191913	0.258868	0.274494	0.254234	0.288709	0.24548	0.257834	0.299611	0.315169	0.348943	0.223532	0.260147	0.0670869	0.0173218
	548.475	0.0970106	0.315061	0.292032	0.270502	0.260058	0.270295	0.276906	0.239423	0.271885	0.253676	0.244567	0.266727	0.293729	0.32628	0.243557	0.261447	0.0501884	0.0129586
	549.1	0.0874058	0.262698	0.307905	0.263716	0.221264	0.333542	0.270842	0.236	0.266154	0.252772	0.241502	0.276698	0.298095	0.352788	0.247053	0.261229	0.0580942	0.0149999
	549.725	0.225842	0.254674	0.294778	0.261102	0.239532	0.33362	0.244984	0.271351	0.288125	0.262835	0.253391	0.291415	0.299144	0.339115	0.225216	0.272342	0.0338085	0.00872932
	550.35	0.0901501	0.283953	0.280591	0.254216	0.218288	0.330807	0.241625	0.217838	0.298129	0.244516	0.248539	0.27293	0.285094	0.305177	0.235357	0.253814	0.0538177	0.0138957
	550.975	0.111403	0.260332	0.288539	0.239262	0.225677	0.27176	0.224041	0.276613	0.27637	0.274469	0.22893	0.278223	0.284094	0.282196	0.224228	0.249742	0.0437877	0.0113059
	551.601	0.0880773	0.270615	0.267632	0.243535	0.208847	0.321451	0.267641	0.23755	0.275096	0.242812	0.211617	0.268889	0.277093	0.283757	0.203873	0.244566	0.0518533	0.0133885
	552.226	0.117972	0.228492	0.277989	0.252306	0.224651	0.252715	0.239641	0.217694	0.260926	0.25003	0.218008	0.263152	0.256287	0.304628	0.223294	0.239186	0.0398182	0.010281
	552.851	0.199685	0.267194	0.251927	0.224836	0.213773	0.292113	0.20702	0.210991	0.2609	0.247288	0.219386	0.258668	0.268483	0.301824	0.198785	0.241525	0.0322806	0.00833481
	553.476	0.0756408	0.248069	0.260743	0.220714	0.202176	0.322486	0.212611	0.245369	0.243811	0.213985	0.221297	0.244201	0.281996	0.300061	0.201109	0.232951	0.0542167	0.0139987
	554.101	0.048082	0.23813	0.269968	0.221644	0.192734	0.26713	0.219216	0.221694	0.271912	0.226464	0.208154	0.241366	0.262702	0.273668	0.200286	0.22421	0.0538592	0.0139064
	554.726	0.0472353	0.242798	0.256479	0.217372	0.183395	0.25961	0.242301	0.204937	0.240334	0.207049	0.199653	0.250051	0.272361	0.277889	0.206619	0.220539	0.0538541	0.0139051
	555.352	0.0957553	0.204268	0.232922	0.206916	0.212131	0.279748	0.22882	0.213369	0.251771	0.221751	0.215029	0.231657	0.249872	0.273177	0.183995	0.220079	0.0416056	0.0107425
	555.977	0.0848952	0.222963	0.254143	0.207645	0.148091	0.258458	0.213671	0.227604	0.226297	0.211792	0.221297	0.233843	0.248896	0.280375	0.215954	0.217062	0.0454573	0.011737
	556.602	-0.00942959	0.205322	0.243207	0.20101	0.19181	0.22617	0.210762	0.176	0.233647	0.210354	0.199367	0.233023	0.2708	0.25404	0.179895	0.201732	0.0620877	0.016031
	557.227	0.0556431	0.209733	0.230128	0.204252	0.17734	0.240195	0.23777	0.19618	0.225448	0.243405	0.196786	0.23086	0.235847	0.263579	0.17325	0.208028	0.0476096	0.0122927
	557.852	0.0404916	0.235484	0.225985	0.202946	0.184832	0.259024	0.211867	0.196865	0.216213	0.204337	0.178567	0.221253	0.231041	0.250976	0.179236	0.202608	0.0492169	0.0127077
	558.478	0.0562271	0.206183	0.231742	0.184498	0.176724	0.250176	0.206344	0.202054	0.199549	0.205685	0.184722	0.209541	0.207552	0.276819	0.167777	0.197706	0.0464293	0.011988
	559.103	0.0724004	0.201192	0.223167	0.184699	0.147681	0.234725	0.171807	0.203207	0.217991	0.189871	0.16556	0.205113	0.221138	0.265892	0.164519	0.191264	0.0434692	0.0112237
	559.728	0.0865009	0.207409	0.214158	0.186936	0.164922	0.210798	0.194373	0.149441	0.197506	0.176592	0.178269	0.197931	0.216235	0.265979	0.164373	0.187428	0.038113	0.00984072
	560.353	0.0579202	0.205021	0.211726	0.18573	0.147168	0.233964	0.201091	0.199712	0.220141	0.196007	0.173404	0.203372	0.212455	0.265314	0.164135	0.19181	0.0449746	0.0116124
	560.978	0.000934271	0.190543	0.207944	0.174521	0.11053	0.285589	0.184499	0.187387	0.189094	0.195844	0.170934	0.198693	0.216504	0.251236	0.178686	0.182862	0.0611489	0.0157886
	561.604	-0.0372803	0.202052	0.200357	0.162231	0.146347	0.175385	0.175977	0.154955	0.1987	0.190257	0.163363	0.193548	0.188014	0.226664	0.174348	0.167661	0.0583836	0.0150746
	562.229	0.0594383	0.197169	0.200935	0.169745	0.15702	0.165501	0.170251	0.136252	0.210933	0.178029	0.172721	0.196929	0.211162	0.202555	0.17228	0.173395	0.0367929	0.00949989
	562.854	0.156478	0.189101	0.201922	0.163085	0.12069	0.218943	0.164705	0.152468	0.176755	0.176518	0.162855	0.175587	0.194551	0.2445	0.1468	0.176331	0.0294815	0.00761208
	563.479	0.125825	0.189618	0.193154	0.161552	0.134647	0.233319	0.153839	0.158883	0.171686	0.165328	0.151734	0.174801	0.185672	0.21805	0.122053	0.169344	0.030349	0.00783607
	564.105	0.0665908	0.174107	0.179931	0.157179	0.142652	0.226346	0.179945	0.14782	0.185352	0.179052	0.145579	0.169565	0.194404	0.215622	0.151139	0.167686	0.0359198	0.00927445
	564.73	0.0175454	0.172472	0.189975	0.153711	0.148399	0.187124	0.169259	0.133333	0.175083	0.159977	0.139981	0.178296	0.189404	0.24161	0.141346	0.159834	0.0461081	0.0119051
	565.355	0.0282011	0.18538	0.182074	0.148006	0.130439	0.178959	0.176067	0.143423	0.181372	0.162408	0.138318	0.180481	0.167305	0.19475	0.130565	0.155183	0.0396182	0.0102294
	565.98	0.0260699	0.181034	0.179328	0.152303	0.125718	0.181616	0.157965	0.146847	0.187051	0.157161	0.134496	0.172331	0.177428	0.225537	0.152603	0.157166	0.042196	0.010895
	566.605	0.088632	0.152228	0.174583	0.149338	0.113711	0.23914	0.13355	0.140468	0.166883	0.129002	0.140168	0.157033	0.190404	0.200214	0.123792	0.153276	0.0361035	0.00932188
	567.231	0.0250483	0.157929	0.164997	0.139687	0.138649	0.216794	0.178705	0.139171	0.169192	0.171671	0.14672	0.157819	0.163402	0.22149	0.126446	0.154515	0.0431956	0.0111531
	567.856	0.0567233	0.16548	0.173066	0.144361	0.137931	0.182045	0.12469	0.134018	0.156826	0.151707	0.137288	0.15355	0.164573	0.192409	0.127764	0.146829	0.0307146	0.00793047
	568.481	-0.0246103	0.130951	0.144571	0.143105	0.109503	0.179526	0.126403	0.139207	0.158498	0.149973	0.126243	0.154222	0.169964	0.2199	0.129247	0.137113	0.0503272	0.0129944
	569.106	0.0740352	0.152077	0.151484	0.147352	0.135468	0.174252	0.115515	0.111207	0.16614	0.154094	0.114589	0.167357	0.161987	0.20825	0.113066	0.143125	0.0319396	0.00824676
	569.731	0.0460676	0.140094	0.15435	0.134384	0.138855	0.189351	0.0924974	0.129658	0.132095	0.137731	0.129867	0.151831	0.176232	0.182262	0.125494	0.137385	0.0340373	0.00878839
	570.356	-0.0366381	0.131145	0.14922	0.129659	0.0946224	0.20359	0.158866	0.101261	0.141223	0.150611	0.129172	0.1356	0.169427	0.16671	0.113523	0.129199	0.0517765	0.0133686
	570.982	0.0832603	0.162468	0.150496	0.137174	0.0850779	0.181889	0.154493	0.121586	0.141064	0.174487	0.116451	0.152298	0.148377	0.190848	0.130034	0.142	0.0302809	0.00781848
	571.607	-0.0470018	0.13164	0.148015	0.126693	0.0991379	0.197222	0.131859	0.110054	0.157224	0.145868	0.118387	0.135885	0.153158	0.210563	0.113487	0.128813	0.0553661	0.0142955
	572.232	0.0347113	0.104124	0.13838	0.124557	0.0952382	0.239843	0.122165	0.110126	0.143399	0.132988	0.113683	0.125857	0.140401	0.19926	0.117568	0.129487	0.0440509	0.0113739
	572.857	0.0285514	0.124949	0.147004	0.127925	0.0730707	0.189507	0.129853	0.133766	0.148733	0.13865	0.113571	0.138616	0.142645	0.177579	0.099191	0.127574	0.0378255	0.00976649
	573.482	0.0731302	0.147495	0.148232	0.120586	0.131773	0.183354	0.150863	0.121694	0.142842	0.159118	0.109265	0.148451	0.139498	0.18628	0.105012	0.13784	0.0283534	0.00732083
	574.108	0.0050797	0.126993	0.13985	0.111664	0.0798439	0.190835	0.121421	0.114847	0.159931	0.119501	0.11727	0.138605	0.142547	0.204261	0.107867	0.125368	0.0444593	0.0114793
	574.733	-0.0128744	0.118258	0.133707	0.109955	0.0841544	0.153606	0.116529	0.110378	0.1244	0.1515	0.102972	0.132561	0.126814	0.178938	0.0994289	0.115355	0.0412677	0.0106553
	575.358	-0.0390611	0.111159	0.139223	0.0984192	0.0788177	0.145343	0.123721	0.105333	0.132413	0.142933	0.0977723	0.118674	0.128302	0.17888	0.0929492	0.110325	0.0467764	0.0120776
	575.983	0.023968	0.129682	0.124578	0.116791	0.0733786	0.154895	0.127801	0.108252	0.117978	0.130884	0.110977	0.113267	0.143864	0.150204	0.100362	0.115126	0.0313023	0.00808222
	576.609	0.0291061	0.118581	0.131178	0.113172	0.105501	0.168705	0.113148	0.107712	0.149662	0.113766	0.100949	0.117103	0.1354	0.179025	0.0888124	0.118121	0.0338097	0.00872962
	577.234	0.0245227	0.125186	0.121495	0.105381	0.106527	0.217204	0.111885	0.104613	0.123365	0.0941427	0.102612	0.109249	0.120301	0.168271	0.10179	0.11577	0.0389725	0.0100626
	577.859	0.063759	0.108771	0.124193	0.104376	0.106322	0.175736	0.129357	0.119135	0.115086	0.149618	0.0923363	0.0967514	0.130302	0.200445	0.0620332	0.118548	0.0356333	0.00920048
	578.484	-0.0286682	0.109782	0.130624	0.101335	0.0850781	0.157649	0.0890482	0.105081	0.139366	0.128661	0.089457	0.113541	0.121082	0.163357	0.0942854	0.106645	0.0430326	0.011111
	579.109	-0.0380977	0.120947	0.122892	0.103672	0.0736863	0.177162	0.0891384	0.0976577	0.128115	0.0984705	0.0981198	0.106199	0.120375	0.173879	0.0658588	0.102538	0.0480237	0.0123997
	579.735	0.0301863	0.11245	0.117521	0.0939456	0.0591133	0.159075	0.0948645	0.0934775	0.100358	0.116937	0.0973999	0.113051	0.113764	0.143584	0.0872931	0.102201	0.0297153	0.00767245
	580.36	-0.00297771	0.113482	0.120002	0.104451	0.0991379	0.165716	0.0795572	0.0883964	0.100013	0.0977739	0.0907353	0.110695	0.117618	0.157257	0.0943586	0.102414	0.0363468	0.0093847
	580.985	-0.0377766	0.116946	0.129565	0.0939456	0.0723522	0.16052	0.0905586	0.119964	0.117819	0.121591	0.0942228	0.0955107	0.125351	0.157749	0.0924	0.103381	0.0445692	0.0115077
	581.61	0.0059263	0.110492	0.118219	0.0956043	0.0828202	0.186909	0.0826683	0.0984505	0.115112	0.121725	0.0883028	0.0975482	0.119838	0.150262	0.0834126	0.103819	0.0376666	0.00972548
	582.235	-0.00490454	0.117785	0.107742	0.0878132	0.0779968	0.145617	0.0940078	0.090018	0.115616	0.112239	0.0774806	0.109022	0.123277	0.156766	0.0831747	0.0995767	0.0358302	0.00925133
	582.861	0.04236	0.0967665	0.112174	0.0834904	0.0842569	0.14716	0.111254	0.0736937	0.119411	0.12208	0.0700962	0.0979807	0.101715	0.155118	0.0860485	0.10024	0.0283332	0.00731559
	583.486	-0.0428272	0.104683	0.103647	0.0899495	0.0747126	0.145988	0.0898372	0.0778738	0.0958472	0.0851761	0.0793919	0.0961254	0.104837	0.168155	0.083193	0.0904393	0.0433126	0.0111833
	584.111	0.0434694	0.105135	0.103165	0.0804243	0.0741995	0.137882	0.0860048	0.084937	0.105453	0.102102	0.07861	0.10201	0.117594	0.125372	0.0851332	0.0954328	0.0223546	0.00577193
	584.736	0.0574239	0.0933675	0.118171	0.0763528	0.0970855	0.144777	0.109157	0.0898378	0.11291	0.105258	0.0827676	0.0963986	0.127985	0.143671	0.0837238	0.102592	0.0235306	0.00607557
	585.361	-0.0336895	0.0874513	0.106609	0.0768805	0.0715313	0.18644	0.0981334	0.0758198	0.111318	0.102546	0.0790692	0.0972636	0.116765	0.151476	0.0692634	0.0931251	0.0456259	0.0117806
	585.986	0.0163192	0.108405	0.107645	0.0837417	0.104167	0.0996562	0.109112	0.0891892	0.117766	0.0920826	0.0845051	0.0817037	0.101446	0.125603	0.0756699	0.0931342	0.0246427	0.00636271
	586.612	-0.0334559	0.0994988	0.0987812	0.0886928	0.0981118	0.142531	0.0713964	0.0973694	0.0952103	0.0861542	0.0721564	0.0910716	0.112789	0.13549	0.0896361	0.0896955	0.0379341	0.00979455
	587.237	-0.0366965	0.100338	0.0964448	0.0787404	0.0598316	0.129522	0.0867036	0.0908829	0.103251	0.0921123	0.0849395	0.0814078	0.0986414	0.158558	0.0763655	0.0867361	0.0399094	0.0103046
	587.862	0.0212822	0.0891078	0.0926871	0.0819573	0.0654763	0.101668	0.0841111	0.0633153	0.108531	0.0837384	0.0675768	0.0802695	0.105349	0.131674	0.0736564	0.0833601	0.0242725	0.00626714
	588.487	-0.0447539	0.0775982	0.0998892	0.0753223	0.095033	0.142648	0.100771	0.0802162	0.0978373	0.0848797	0.0759045	0.0794386	0.120058	0.13734	0.0725582	0.086316	0.0410508	0.0105993
	589.112	0.0344193	0.101435	0.0921572	0.0797205	0.102422	0.122295	0.0764687	0.078991	0.116386	0.0946318	0.0740676	0.0983677	0.107788	0.130749	0.0730158	0.0921943	0.0231898	0.00598758
	589.738	0.0760787	0.0961857	0.103623	0.0762522	0.0556239	0.117294	0.0807521	0.0877838	0.099456	0.0858875	0.058852	0.0928814	0.124351	0.133611	0.0690438	0.0905117	0.021948	0.00566694
	590.363	-0.0393823	0.0802659	0.104273	0.0748197	0.074097	0.117001	0.070968	0.085946	0.0966432	0.0729043	0.0654421	0.0793703	0.105349	0.120805	0.0740225	0.078835	0.0358253	0.00925004
	590.988	0.0137211	0.0933675	0.10119	0.0823846	0.043514	0.115263	0.0924974	0.0605766	0.104684	0.0986483	0.0572262	0.0851754	0.104495	0.155928	0.0624726	0.0847429	0.032631	0.00842528
	591.613	-0.0196474	0.085257	0.0868581	0.0717032	0.0287357	0.108641	0.072749	0.0620901	0.0963779	0.0863321	0.0642631	0.0829103	0.100934	0.153528	0.0675428	0.0765517	0.0367702	0.00949402
	592.238	0.0228294	0.0856872	0.091555	0.0679334	0.097188	0.101043	0.0912124	0.101009	0.0941754	0.0913119	0.0646975	0.0831949	0.119594	0.123175	0.0542173	0.0859216	0.0245345	0.00633478
	592.864	0.0938285	0.092507	0.0906879	0.0708236	0.0598318	0.110575	0.0808422	0.0795316	0.0823139	0.0993153	0.062265	0.0806907	0.108203	0.120371	0.0564504	0.0858825	0.0183354	0.00473419
	593.489	-0.0418638	0.0893229	0.0896281	0.0781623	0.0621921	0.127354	0.0723207	0.0621982	0.0957144	0.0629446	0.0661247	0.08686	0.0960802	0.141127	0.0571277	0.0763529	0.0392133	0.0101248
	594.114	0.0409879	0.0836865	0.100756	0.0706979	0.0570608	0.109227	0.0809324	0.0785946	0.112565	0.0771283	0.0651443	0.0819086	0.0974705	0.142399	0.0654012	0.084264	0.0243152	0.00627816
	594.739	0.00662699	0.0915819	0.0903266	0.068813	0.074302	0.136046	0.0934217	0.0761081	0.112273	0.0777656	0.0711635	0.0774467	0.100276	0.134247	0.0613743	0.0847848	0.0301185	0.00777657
	595.365	0.0362002	0.0714885	0.090977	0.0672548	0.0583949	0.113778	0.0871771	0.0569369	0.0922648	0.0747569	0.0599442	0.0663829	0.109203	0.135605	0.0587568	0.0786081	0.025295	0.00653115
	595.99	0.011765	0.0800508	0.0823056	0.0745432	0.0728655	0.111806	0.0702466	0.0525045	0.0906196	0.0674206	0.0499783	0.0675439	0.109764	0.11485	0.0724301	0.0752462	0.0254963	0.00658313
	596.615	0.0684884	0.0630983	0.0839195	0.0683857	0.0631158	0.118232	0.0692998	0.0694414	0.102906	0.0901263	0.0576482	0.0787557	0.0994219	0.105542	0.0700139	0.0805596	0.0178776	0.00461598
	597.24	0.0344194	0.0800078	0.0902303	0.0688884	0.0475165	0.131963	0.0857568	0.0624865	0.105559	0.0604992	0.0526218	0.0738384	0.0980315	0.138236	0.0719359	0.0801327	0.0282883	0.007304
	597.865	0.0359958	0.0767377	0.0799933	0.0693157	0.0731733	0.111571	0.0634159	0.0867027	0.0889744	0.0849241	0.0536022	0.0745669	0.096812	0.146504	0.0663164	0.0805737	0.0246891	0.00637471
	598.49	-0.0130788	0.0783942	0.0864968	0.0624042	0.0650657	0.118994	0.0633031	0.0614415	0.10203	0.0837533	0.0630593	0.0706399	0.105227	0.117943	0.0477559	0.0742286	0.0314907	0.00813085
	599.116	0.0444036	0.090248	0.0868581	0.0707231	0.0642448	0.110497	0.0549394	0.0695496	0.109778	0.081456	0.0524977	0.0720627	0.114033	0.120516	0.0493667	0.0794116	0.0243063	0.00627587
	599.741	0.00881648	0.0611406	0.0857742	0.0603182	0.0568555	0.126572	0.0597187	0.0695135	0.0911769	0.0785215	0.0471859	0.0660755	0.0929336	0.135432	0.0467308	0.072451	0.030506	0.00787661
	600.366	0.0413967	0.0665405	0.081029	0.0645656	0.0767653	0.125127	0.0686009	0.0660541	0.099058	0.0795145	0.0560968	0.0585289	0.109252	0.126297	0.0487077	0.0778356	0.0252796	0.00652716
	600.991	0.0169907	0.0688209	0.0851238	0.0582573	0.0632183	0.118154	0.0550295	0.0501262	0.0780947	0.0759722	0.0564443	0.0660983	0.114374	0.141156	0.0457607	0.072908	0.0305013	0.0078754
	601.616	0.0196766	0.0838586	0.0837027	0.0660736	0.0497742	0.101258	0.0492358	0.0632792	0.0871435	0.0681764	0.0494446	0.0652332	0.0965437	0.11115	0.0526432	0.0698128	0.0234254	0.0060484
	602.242	-0.0106848	0.0721984	0.0795838	0.0634095	0.0552135	0.138097	0.0816989	0.0870631	0.0870373	0.0786993	0.0477692	0.0605209	0.102837	0.138438	0.0401047	0.074799	0.0357718	0.00923624
	602.867	0.0222748	0.082073	0.0872916	0.0591621	0.052032	0.1229	0.0659633	0.0616937	0.0887356	0.0703255	0.0592367	0.0667016	0.111545	0.130171	0.0549678	0.0756716	0.027826	0.00718465
	603.492	0.0631751	0.0548372	0.0766451	0.0561965	0.0471059	0.127627	0.0674061	0.0673154	0.0898236	0.0691102	0.0514552	0.0557174	0.0854697	0.113462	0.0606787	0.0724017	0.0222717	0.00575054
	604.117	0.00653937	0.0692296	0.0818721	0.0566739	0.0720443	0.133448	0.0718923	0.0643604	0.0828181	0.0893852	0.0514552	0.0640153	0.107569	0.114185	0.0575853	0.0748715	0.0288597	0.00745155
	604.742	0.0233841	0.0788461	0.0805954	0.0609465	0.0720443	0.124404	0.0736958	0.0677477	0.0916015	0.0648714	0.0523239	0.0600086	0.098373	0.138699	0.0429236	0.0753643	0.0284716	0.00735133
	605.368	0.0216033	0.0644537	0.0768138	0.0540351	0.0469007	0.103192	0.0559087	0.0734054	0.0993234	0.0654642	0.0592988	0.0627974	0.102032	0.143064	0.0532838	0.072105	0.0284533	0.00734661
	605.993	0.0143633	0.0732526	0.0765729	0.0578803	0.0492611	0.087624	0.0601695	0.0701622	0.078705	0.0541558	0.0456097	0.0584834	0.100861	0.125748	0.0558464	0.0672464	0.0249461	0.00644106
	606.618	0.000934183	0.0768238	0.0816793	0.0603684	0.052032	0.0778186	0.0701114	0.0643243	0.0816505	0.0643526	0.0465157	0.0638446	0.104276	0.154193	0.04307	0.0694663	0.0318364	0.00822012
	607.243	0.0675542	0.0717036	0.0755372	0.0548141	0.050903	0.123506	0.0463276	0.0665946	0.087568	0.0542151	0.0442817	0.0509937	0.0869576	0.122915	0.0449187	0.0699193	0.0249889	0.00645211
	607.869	0.00601388	0.0773616	0.0838713	0.0538088	0.0601396	0.109481	0.056833	0.055063	0.0988722	0.0563197	0.0530562	0.0600883	0.106276	0.118232	0.0463831	0.0694533	0.0285857	0.00738079
	608.494	0.0579203	0.0623884	0.0831728	0.052703	0.0419746	0.0908274	0.0478831	0.0519279	0.0766618	0.0626334	0.0470245	0.0551938	0.109447	0.111092	0.042887	0.0662491	0.0220997	0.00570612
	609.119	0.006481	0.0498677	0.0812458	0.0492096	0.0266832	0.0869013	0.0649939	0.0586307	0.0935651	0.0506284	0.0542104	0.0571744	0.0873479	0.0985749	0.0530275	0.0612361	0.024376	0.00629385
	609.744	0.00980908	0.0653142	0.0725263	0.048531	0.0523399	0.121494	0.0583209	0.0532252	0.0782805	0.0625593	0.0489854	0.0485123	0.0931288	0.098228	0.0441499	0.0636936	0.0257218	0.00664135
	610.369	-0.012816	0.0598498	0.0738992	0.0586343	0.0716339	0.102899	0.0481086	0.044	0.0800584	0.0562456	0.0421223	0.0520409	0.098617	0.100223	0.0470054	0.0615014	0.0281826	0.00727671
	610.995	0.0429147	0.0529011	0.0748868	0.0494358	0.0480296	0.0870771	0.0538798	0.0518919	0.0819159	0.0468046	0.0442817	0.0504018	0.0875674	0.105397	0.0466027	0.0615992	0.0193404	0.00499367
	611.62	-0.000262743	0.0673795	0.0774882	0.0508432	0.0776889	0.113251	0.0463276	0.0540901	0.0695237	0.0636264	0.0385479	0.0427072	0.0934703	0.119186	0.0417704	0.0637092	0.0295053	0.00761823
	612.245	0.0558183	0.047953	0.0632286	0.0484807	0.046798	0.102176	0.0390008	0.0580181	0.0798992	0.0472789	0.0421098	0.0504815	0.0928849	0.114734	0.0412762	0.0620092	0.0231509	0.00597754
	612.87	0.0267998	0.0670568	0.0719482	0.0487572	0.0529557	0.0980155	0.0414131	0.0505585	0.0753085	0.0501689	0.0463667	0.053771	0.101934	0.10242	0.0579514	0.0630283	0.0221071	0.00570802
	613.495	0.0176038	0.0640234	0.0643126	0.0520244	0.0508005	0.0774865	0.0544434	0.0505946	0.0735306	0.0624407	0.0425194	0.0397819	0.0873966	0.0855086	0.0599282	0.0588264	0.0176816	0.00456536
	614.12	0.0220413	0.0502764	0.0700212	0.0482294	0.0541872	0.0870966	0.0427431	0.0517477	0.0778825	0.0569718	0.0449395	0.04767	0.090592	0.0957419	0.0419534	0.0588063	0.0202217	0.00522122
	614.746	0.0300986	0.0694232	0.0642162	0.0486064	0.0440271	0.0861591	0.0551197	0.0465586	0.074592	0.062663	0.0430158	0.0486261	0.0891041	0.102448	0.0423195	0.0604652	0.019783	0.00510795
	615.371	0.0291937	0.047867	0.0593988	0.0416447	0.0607554	0.0852997	0.0398575	0.0621622	0.0770068	0.0630039	0.0348743	0.0484782	0.0873966	0.101466	0.0398118	0.0585477	0.0206442	0.00533032
	615.996	0.0127869	0.0493944	0.0649147	0.0446103	0.0430008	0.0759239	0.0541052	0.0486847	0.0777763	0.0524069	0.039032	0.046657	0.080079	0.100887	0.0235942	0.0542569	0.0219162	0.00565874
	616.621	0.0382145	0.0516748	0.0629878	0.0444344	0.0571635	0.0777795	0.0410975	0.0430991	0.0726018	0.0502579	0.0417251	0.0465545	0.0812499	0.0994421	0.0360961	0.0562919	0.0180796	0.00466813
	617.246	0.0710866	0.0532453	0.0622411	0.0395336	0.033867	0.101453	0.0582082	0.0443243	0.0687276	0.0479162	0.0265095	0.0445967	0.0757128	0.0834273	0.0438388	0.0569792	0.0195683	0.00505252
	617.872	-0.0423308	0.0581503	0.0629155	0.0440574	0.0534689	0.0894406	0.0475675	0.0389189	0.074247	0.0456189	0.0369718	0.0408063	0.0668829	0.1032	0.0484332	0.0512232	0.0310339	0.00801291
	618.497	0.0291936	0.0355614	0.0600973	0.0372716	0.0478242	0.0814907	0.0472744	0.0450811	0.0663394	0.0540076	0.0383494	0.0405787	0.0808352	0.105455	0.0342839	0.0535762	0.020852	0.00538397
	619.122	0.0129036	0.0433492	0.0624819	0.0399356	0.0333539	0.0947144	0.0461247	0.0520721	0.0682765	0.0613143	0.0338939	0.0444487	0.0805669	0.0940942	0.0438022	0.0540888	0.0221988	0.0057317
	619.747	-0.00251069	0.0491793	0.0611331	0.0457413	0.0490559	0.0941871	0.0325758	0.0358919	0.0657822	0.0382381	0.0337201	0.0375509	0.0782252	0.0932848	0.0282801	0.0493557	0.0248989	0.00642888
	620.372	0.0140713	0.0566874	0.0589411	0.0405891	0.0448481	0.057192	0.0277289	0.0374775	0.0773252	0.041143	0.0356314	0.0439138	0.083811	0.0764027	0.0351625	0.0487283	0.0188679	0.00487167
	620.998	0.0129912	0.0326141	0.0559302	0.0387042	0.0505953	0.0671732	0.0394292	0.0477838	0.057158	0.0531183	0.0299348	0.0467366	0.0666146	0.103778	0.0326732	0.0490157	0.020289	0.0052386
	621.623	0.0456881	0.0328507	0.0542201	0.0407902	0.0344828	0.0924096	0.0458091	0.0444685	0.0570254	0.0485238	0.0346509	0.0385867	0.0747616	0.0855665	0.0235942	0.0502285	0.0191395	0.0049418
	622.248	0.0245227	0.0461674	0.0538587	0.0401116	0.0430008	0.0869794	0.0589747	0.0482523	0.0681438	0.0424176	0.0462054	0.0392242	0.0629071	0.0993554	0.0302204	0.0526894	0.0194577	0.00502395
	622.873	0.012057	0.0446615	0.0579536	0.0446103	0.0426929	0.0770959	0.0340863	0.0531171	0.0629428	0.0494279	0.0337325	0.0352972	0.0774691	0.0971873	0.0259006	0.0498821	0.0213252	0.00550613
	623.498	0.0262743	0.047028	0.053088	0.0406142	0.0372537	0.0745761	0.0371523	0.0371892	0.0732652	0.0473678	0.0295377	0.0417511	0.0656389	0.0945567	0.0327464	0.0492026	0.018829	0.00486163
	624.124	0.044316	0.0408752	0.0573514	0.0368192	0.0389983	0.0809829	0.0339961	0.046991	0.0668436	0.0508804	0.0270555	0.0410795	0.0836159	0.0967826	0.0339911	0.0520386	0.0201537	0.00520367
	624.749	0.0262743	0.0471355	0.0513055	0.0439066	0.0340724	0.0659622	0.035191	0.0387388	0.0588563	0.0455893	0.0322557	0.0431056	0.0668585	0.094152	0.0220017	0.047027	0.0179067	0.0046235
	625.374	0.00785308	0.0429835	0.0477406	0.0372465	0.0386904	0.0811391	0.0290816	0.0281802	0.066021	0.038994	0.0308408	0.0377786	0.0752006	0.0967537	0.0409467	0.04663	0.0225557	0.00582387
	625.999	0.0323758	0.0463825	0.0490895	0.0319435	0.0433088	0.0712751	0.0379187	0.0372613	0.065676	0.0428474	0.035135	0.0313361	0.0670293	0.0881681	0.0333504	0.0475398	0.0168437	0.00434901
	626.625	0.00741522	0.0444463	0.047018	0.0398603	0.0405377	0.0513517	0.041661	0.0343063	0.0598116	0.0447445	0.0297363	0.0382567	0.0634193	0.0754777	0.033808	0.0434567	0.015242	0.00393546
	627.25	0.0417761	0.0303122	0.0470662	0.037347	0.0407431	0.0700445	0.0213039	0.0382342	0.0632878	0.0376304	0.0208501	0.0376534	0.064273	0.0774145	0.0189266	0.0431242	0.0175437	0.00452977
	627.875	-0.00280259	0.0544715	0.0484633	0.0380005	0.0453613	0.103133	0.0302989	0.0344504	0.0565743	0.0377194	0.0258517	0.0301637	0.0621021	0.0899604	0.0288293	0.0455051	0.0251504	0.0064938
	628.5	-0.00656858	0.0415851	0.0502457	0.0354369	0.029762	0.0730135	0.0340412	0.0362523	0.0567334	0.0327691	0.0209867	0.0346825	0.0632973	0.0945278	0.0300373	0.0417868	0.0228483	0.00589941
	629.125	0.0135167	0.0412624	0.0459341	0.0323708	0.0465928	0.0721931	0.0395419	0.0425946	0.0500199	0.0415431	0.0288303	0.0329752	0.070493	0.0859711	0.0259189	0.0446505	0.0183977	0.00475025
	629.75	0.0052257	0.0386163	0.0507034	0.0298324	0.0192939	0.0672513	0.0308851	0.0337297	0.0569988	0.0414394	0.0279988	0.0373574	0.0801522	0.0647241	0.0250037	0.0406141	0.019335	0.00499228
	630.376	0.024873	0.0394768	0.0422247	0.0383774	0.0331486	0.0854754	0.0321024	0.0298018	0.0612711	0.0463748	0.0294136	0.0351151	0.0739322	0.0903362	0.0249488	0.0457915	0.0209055	0.00539778
	631.001	0.0233841	0.0427468	0.0445612	0.0323456	0.0256569	0.0806118	0.0365661	0.0415135	0.0538145	0.0340882	0.0269811	0.0288205	0.0554187	0.0864048	0.0285364	0.0427634	0.018548	0.00478907
	631.626	0.0590296	0.0432416	0.0417189	0.0316168	0.0348932	0.0724861	0.033658	0.0291531	0.0522755	0.0329915	0.0275271	0.0279782	0.0634681	0.0898448	0.0304034	0.0446857	0.0182265	0.00470606
	632.251	0.0292812	0.033238	0.0427787	0.0375984	0.0274015	0.0732675	0.0278868	0.0278919	0.0505506	0.0357778	0.0221285	0.0340451	0.0626143	0.0782817	0.0312454	0.0409325	0.0168471	0.00434991
	632.876	0.00490454	0.0446615	0.038443	0.0280982	0.025041	0.0690679	0.0246404	0.0244685	0.0584583	0.0234764	0.0259262	0.0327248	0.061346	0.0908276	0.0412579	0.0395561	0.0213632	0.00551597
	633.502	0.0184212	0.0394338	0.0405627	0.0301842	0.0325329	0.059282	0.0244826	0.0285045	0.0454027	0.0398832	0.0262985	0.0271815	0.0630046	0.0693782	0.0215258	0.0377386	0.0150582	0.00388801
	634.127	-0.0325801	0.0323559	0.044248	0.029958	0.0285303	0.0600633	0.0243248	0.0264865	0.0616956	0.0324431	0.0247347	0.0326565	0.0578579	0.0601856	0.0272551	0.0340143	0.0224703	0.00580182
	634.752	0.0336019	0.043973	0.0449706	0.0287768	0.0143678	0.0657669	0.0348754	0.028	0.0448454	0.0299087	0.0215948	0.0222528	0.0514184	0.0621513	0.0341558	0.0373773	0.0142119	0.00366949
	635.377	0.00767792	0.0257083	0.0418393	0.025409	0.0139574	0.0656888	0.0175616	0.020973	0.0499934	0.0249881	0.0275644	0.0306759	0.0549309	0.0717486	0.0214709	0.0333458	0.0185216	0.00478226
	636.003	0.0418637	0.0364219	0.0420561	0.027118	0.0135468	0.0743808	0.0250011	0.0183063	0.0490116	0.0368153	0.0188768	0.0293897	0.0495158	0.0657647	0.0242166	0.036819	0.0168635	0.00435414
	636.628	0.0314416	0.0238582	0.0383466	0.0283747	0.0213465	0.0646144	0.0305244	0.0173333	0.0550882	0.0243508	0.0182687	0.0280579	0.0583945	0.0736565	0.0271636	0.0360547	0.0173568	0.00448152
	637.253	-0.00715244	0.036594	0.0391175	0.0285255	0.0299672	0.0747715	0.0312909	0.0215856	0.0422184	0.0225871	0.0176482	0.0267717	0.048345	0.0715463	0.0214892	0.033687	0.0198064	0.005114
	637.878	0.0372219	0.0374976	0.036781	0.031089	0.0193966	0.0599851	0.0247757	0.0270991	0.0538941	0.0290491	0.0264102	0.0240171	0.0506622	0.0618911	0.0287011	0.0365647	0.0132225	0.00341404
	638.503	0.0103346	0.0311942	0.0394547	0.0254844	0.0111864	0.0708063	0.0253618	0.0206486	0.0424837	0.0328877	0.0234316	0.0254627	0.0579555	0.0797849	0.0205557	0.0344689	0.0198387	0.00512233
	639.129	0.0032405	0.0293441	0.0365883	0.0269673	0.0164204	0.0725448	0.0317643	0.0338739	0.0375481	0.0327988	0.0158362	0.0250188	0.0426617	0.0646952	0.0267059	0.0330672	0.0169425	0.00437454
	639.754	0.0198809	0.0391541	0.0316264	0.0246802	0.0213464	0.0453551	0.0246179	0.0287928	0.0378666	0.0332138	0.0194105	0.0242903	0.0523941	0.0646374	0.0300007	0.0331511	0.0124565	0.00321626
	640.379	0.0247854	0.0355399	0.037889	0.0266656	0.0370483	0.0554536	0.0215294	0.0218739	0.0320817	0.0340437	0.021632	0.0218658	0.0536137	0.0577862	0.0208486	0.0335105	0.0125221	0.00323319
	641.004	-0.0153267	0.0226104	0.0298921	0.0278469	0.0291462	0.0538323	0.027233	0.0381261	0.0427226	0.0301458	0.0237915	0.0271815	0.0463936	0.070679	0.0219102	0.0317456	0.0180883	0.00467038
	641.629	0.0112396	0.0228471	0.0341796	0.0293548	0.0208333	0.069439	0.0197935	0.0235676	0.0414488	0.0287527	0.0164939	0.0244497	0.0533942	0.0614575	0.0233746	0.0320417	0.0164724	0.00425315
	642.255	-0.00256906	0.0239227	0.0359621	0.0277966	0.0244253	0.0736972	0.0168177	0.0211892	0.048587	0.0324579	0.0284083	0.0213195	0.0469547	0.0777903	0.0196954	0.033097	0.0204827	0.0052886
	642.88	0.000437905	0.0325065	0.0256046	0.0238257	0.044335	0.0534026	0.0325984	0.0275316	0.0470479	0.0265295	0.0189637	0.026692	0.0445642	0.060677	0.0252233	0.0326627	0.0146259	0.00377639
	643.505	0.0033865	0.0291074	0.0305424	0.0246551	0.0216544	0.0653762	0.025948	0.0221982	0.033037	0.0267518	0.0216817	0.0236074	0.0431739	0.045674	0.0245461	0.0294227	0.0134416	0.00347061
	644.13	0.0343901	0.0185874	0.0313614	0.0298826	0.00451555	0.0427182	0.0145182	0.0154595	0.03784	0.0391125	0.0192988	0.0260887	0.0424421	0.0564565	0.0144238	0.028473	0.0135411	0.0034963
	644.755	0.0150347	0.0238582	0.0364679	0.0255849	0.0274015	0.0594968	0.0277966	0.0210451	0.0346292	0.0295234	0.0233199	0.0196121	0.0330512	0.069147	0.013655	0.0306416	0.0147464	0.0038075
	645.38	0.0316459	0.0261601	0.0298439	0.0245797	0.00810761	0.0293773	0.0239866	0.018955	0.0398567	0.0177407	0.0207757	0.0258497	0.0397834	0.0454716	0.0259738	0.0272072	0.00919686	0.00237462
	646.006	0.00700648	0.0293226	0.0318913	0.0226696	0.0307882	0.056938	0.012602	0.0241081	0.0324798	0.0314353	0.0201179	0.0230155	0.0434178	0.0532767	0.0136367	0.0288471	0.0136002	0.00351155
	646.631	-0.00306534	0.0277306	0.0286877	0.0246299	0.0218596	0.0401594	0.0120159	0.0272793	0.0390341	0.0163772	0.0166553	0.0201129	0.0371979	0.0432169	0.0122456	0.0242758	0.0121726	0.00314295
	647.256	0.0369008	0.0207173	0.0275075	0.0245797	0.0110837	0.0334596	0.0354389	0.0210811	0.0327982	0.0297309	0.0150171	0.0220252	0.0463449	0.046917	0.0174623	0.0280709	0.0103248	0.00266584
	647.881	-0.0201436	0.017856	0.0283746	0.0246048	0.0216544	0.0591257	0.0178322	0.0188829	0.0401221	0.0167625	0.0194477	0.0190202	0.0409054	0.0570636	0.0145519	0.0250707	0.0184722	0.00476951
	648.506	0.000379489	0.0323774	0.0295549	0.0260876	0.0230911	0.0428549	0.0271653	0.0201441	0.0275441	0.0285452	0.0200434	0.0185876	0.0427348	0.0609661	0.018286	0.0278908	0.013281	0.00342914
	649.132	0.0289017	0.0341846	0.0253397	0.0169142	0.0170362	0.0472107	0.0191172	0.0248649	0.0322409	0.0209865	0.0150791	0.0243814	0.033539	0.0596941	0.0224594	0.02813	0.0117186	0.00302573
	649.757	0.0127284	0.0265043	0.0260863	0.0215637	0.0069786	0.0457848	0.00455387	0.0146306	0.018522	0.0223945	0.0116041	0.0205454	0.0404176	0.0579597	0.0202994	0.0233716	0.0141483	0.00365306
	650.382	-0.00151804	0.0249553	0.0261345	0.0239011	0.0224754	0.0443003	0.0182605	0.0104865	0.0257662	0.022024	0.0213714	0.0234366	0.0236359	0.0535657	0.0281337	0.0244619	0.0120804	0.00311914
	651.007	-0.010714	0.0256868	0.0241112	0.0215637	0.0110837	0.0472303	0.0141125	0.0244324	0.0306753	0.0209865	0.016072	0.0201926	0.0415884	0.0445466	0.0168583	0.0232284	0.0139591	0.00360424
	651.632	0.00402873	0.0246327	0.0266885	0.0234738	0.00164209	0.0466638	0.0175391	0.0192432	0.0337535	0.0209717	0.0188148	0.0174722	0.0389541	0.0430723	0.0181212	0.0236714	0.0123255	0.00318243
	652.258	0.0263911	0.0336467	0.0250747	0.0186986	-0.00769705	0.036331	0.025993	0.0134054	0.0369112	0.0157695	0.0178219	0.0176088	0.0334902	0.0370595	0.0151193	0.0230416	0.0116624	0.00301122
	652.883	0.000846602	0.0266119	0.0274352	0.0162105	0.0150862	0.035784	0.00901752	0.0162162	0.0275972	0.0203936	0.0139373	0.0186104	0.0405151	0.045992	0.00944501	0.0215799	0.0119872	0.00309509
	653.508	0.00659774	0.0217499	0.0297717	0.0167131	0.00287361	0.0284007	0.0170882	0.0189189	0.0273318	0.0208086	0.0116661	0.0149111	0.0388565	0.0407308	0.0109094	0.0204885	0.0105725	0.0027298
	654.133	0.0380977	0.0181357	0.0217266	0.0171655	0.0184729	0.0499453	0.0192524	0.0275315	0.0266949	0.0157547	0.0177226	0.0183942	0.0402468	0.035036	0.0106348	0.0249874	0.0107069	0.00276451
	654.759	0.011298	0.0287847	0.0250747	0.0184976	0.0172414	0.0448473	0.0252717	0.0186667	0.0249967	0.0218461	0.0142104	0.0175518	0.0278313	0.0365103	0.0155769	0.0232137	0.00857097	0.00221302
	655.384	0.0111228	0.0236	0.0251951	0.0182965	0.019294	0.0259591	0.0212589	0.0165405	0.0333023	0.022928	0.0135526	0.0142168	0.0369783	0.0364524	0.0116232	0.0220214	0.00816327	0.00210775
	656.009	0.00651016	0.0237936	0.0214857	0.014979	0.00759452	0.0285764	0.018779	0.0197117	0.0314184	0.0175925	0.0120509	0.0193617	0.0309047	0.0457029	0.0143323	0.0208529	0.00984325	0.00254152
	656.634	0.00534244	0.0238367	0.0297958	0.0149036	0.0150862	0.0459215	0.0204022	0.025045	0.0242006	0.00804778	0.0151536	0.0118834	0.0317341	0.04816	0.0161261	0.0223759	0.0120666	0.00311559
	657.259	-0.0218077	0.0219005	0.0270498	0.0127674	0.0251436	0.0399836	0.00919789	0.0305225	0.0298262	0.0152804	0.0120261	0.0191226	0.0331244	0.0378689	0.0170596	0.0206044	0.0145708	0.00376216
	657.885	0.020494	0.0290644	0.0239667	0.0249566	0.00646552	0.0310766	0.0186212	0.0152793	0.0341781	0.0119902	0.0153894	0.0136476	0.0360514	0.055358	0.0123737	0.0232608	0.0120722	0.00311702
	658.51	0.00218953	0.0144354	0.0212208	0.0149539	0.00687608	0.0339675	0.0125569	0.0167568	0.0238026	0.0142874	0.0118896	0.0195552	0.0338318	0.0339086	0.00836507	0.0179065	0.0095772	0.00247282
	659.135	0.0317043	0.0223738	0.0218952	0.0167885	0.0178571	0.0281272	0.0169079	0.0153514	0.0204591	0.01531	0.00798015	0.0122818	0.0304168	0.0541439	0.0122639	0.0215907	0.0108959	0.00281331
	659.76	0.0378058	0.0189532	0.0254601	0.0194024	0.018165	0.0386163	0.01028	0.0131531	0.0304365	0.0174591	0.0170649	0.0164933	0.0355636	0.0507907	0.00981109	0.0239637	0.0116457	0.00300691
	660.385	0.0187423	0.0231483	0.0211003	0.0148282	0.00851801	0.0404719	0.0187565	0.0217658	0.0267746	0.0176666	0.0109463	0.0155485	0.0345391	0.0410199	0.0176819	0.0221006	0.00945369	0.00244093
	661.01	-0.00721081	0.0199428	0.0228586	0.0180955	0.0113916	0.0408626	0.0207404	0.0111351	0.0342311	0.00798849	0.0153646	0.0159355	0.025075	0.0442286	0.00325815	0.0189265	0.0131689	0.0034002
	661.636	0.00814504	0.0286341	0.0176318	0.0158084	0.00718381	0.0417611	0.00820597	0.0260901	0.0240414	0.0178148	0.0135029	0.0157648	0.0352709	0.0492296	0.0148448	0.0215953	0.0121367	0.00313368
	662.261	-0.000350324	0.018609	0.0248338	0.0166378	0.0113916	0.0328346	0.0226566	0.0150991	0.0227942	0.0163623	0.0140118	0.0180413	0.0315877	0.0307288	0.00984769	0.0190057	0.00863715	0.0022301
	662.886	0.0221872	0.0128649	0.0188843	0.015356	0.0067734	0.0303344	0.0165021	0.0157477	0.0243333	0.0086258	0.0134905	0.0182007	0.0332707	0.0438239	0.0100857	0.0193654	0.0097306	0.00251243
	663.511	-0.0248146	0.0176624	0.0201368	0.0175677	0.0140599	0.0384991	0.0109563	0.0112432	0.03041	0.0209568	0.0153025	0.0125549	0.0303437	0.0265083	0.013417	0.0169869	0.0136602	0.00352704
	664.136	0.00289017	0.0155756	0.0176318	0.0154063	0.00800493	0.0284788	0.0091077	0.0188469	0.0230596	0.0135612	0.0154142	0.016516	0.0315145	0.0322609	0.013234	0.0174335	0.0081185	0.00209619
	664.762	0.00899168	0.0246542	0.0267367	0.0167131	0.00687592	0.0213493	0.0192975	0.0147748	0.0179116	0.0136797	0.0127087	0.00993694	0.0293924	0.0387073	0.0121357	0.0182577	0.00838298	0.00216448
	665.387	0.00770713	0.0164576	0.0179449	0.0185227	0.00174477	0.04348	0.0152397	0.0142342	0.0179647	0.0143022	0.0113931	0.0179161	0.0244408	0.0305264	0.00968298	0.0174372	0.00953593	0.00246217
	666.012	0.0191802	0.014629	0.0180412	0.0139989	0.00759437	0.0316236	0.0158934	0.0176937	0.023776	0.0207049	0.0124604	0.0117809	0.0165378	0.0270286	0.0142956	0.0176826	0.00596147	0.00153924
	666.637	-0.0207567	0.0209754	0.024617	0.0206339	0.0128284	0.0411556	0.0125118	0.0166847	0.0217858	0.0128794	0.0115917	0.0138184	0.0253677	0.0320585	0.0117696	0.0171947	0.013004	0.00335761
	667.263	-0.0132539	0.0126713	0.0207149	0.0162859	0.000102525	0.035784	0.0144957	0.0165766	0.020353	0.0125534	0.00991623	0.0141485	0.0222455	0.0318561	0.0076878	0.0148092	0.0113884	0.00294047
	667.888	0.00837861	0.0117892	0.0156807	0.0176934	0.00236053	0.020236	0.00951349	0.0136216	0.0175932	0.0114418	0.0102637	0.0116216	0.0161963	0.0291677	0.0127398	0.0138865	0.00590446	0.00152453
	668.513	-0.000729856	0.0199858	0.0184507	0.0160095	0.0148809	0.0291234	0.0150142	0.00882887	0.0173013	0.0170293	0.014682	0.0153209	0.0248067	0.0327523	0.00885926	0.016821	0.00788112	0.0020349
	669.138	0.0130788	0.0252566	0.0205463	0.0158838	0.00102632	0.0278537	0.0172235	0.0140541	0.0312591	0.00951506	0.0112938	0.0185307	0.0244164	0.0334461	0.00953653	0.0181947	0.00869129	0.00224408
	669.763	0.00332808	0.0191898	0.0214857	0.0145267	-0.00297629	0.0307641	0.0197484	0.0186306	0.0179912	0.0132647	0.00809185	0.0112345	0.0238798	0.0356141	0.00616855	0.0160628	0.00980532	0.00253172
	670.389	-0.00280259	0.0229116	0.0176559	0.014401	0.00400246	0.0184585	0.0118806	0.0181982	0.0166379	0.0118864	0.010301	0.0114053	0.0260507	0.0278091	0.0227706	0.0154378	0.00787774	0.00203402
	671.014	0.00764871	0.00752962	0.0148136	0.0163613	-0.00174461	0.0327565	0.00755218	0.0127928	0.0196364	0.0133685	0.0128452	0.0118606	0.0224163	0.0246004	0.00803559	0.0140315	0.00811588	0.00209551
	671.639	0.0100134	0.0102403	0.0115136	0.0171907	-0.00472075	0.0246699	0.00876958	0.022018	0.0153642	0.00432771	0.0117654	0.01589	0.0232944	0.0277513	0.00799897	0.0137391	0.00823328	0.00212582
	672.264	-0.0209319	0.0118538	0.0157289	0.0177185	0.00277094	0.0209391	0.0262861	0.0205045	0.0203795	0.010182	0.0133416	0.0101987	0.0197087	0.0294279	0.00893248	0.0138027	0.0114747	0.00296275
	672.889	-0.0139546	0.0229116	0.0122603	0.0141496	0.00205249	0.0154504	0.0041706	0.0164685	0.0165583	0.00440183	0.0111697	0.0113711	0.0234651	0.0292834	0.00915214	0.0119274	0.0100243	0.00258827
	673.514	-0.0137794	0.0156186	0.0151749	0.0144764	0.0169335	0.0256075	0.0119032	0.0135135	0.0169563	0.0106266	0.010847	0.0112573	0.0189526	0.0352094	0.00805388	0.0140901	0.00990314	0.00255698
	674.14	0.0042331	0.0242024	0.0191974	0.0142502	0.00359206	0.0170326	0.00888229	0.0106666	0.0196099	0.00834419	0.00734718	0.0108589	0.0191721	0.0236464	0.00746815	0.0132336	0.00659609	0.0017031
	674.765	0.0343609	0.0158552	0.0162588	0.0200809	-0.00759437	0.0265255	0.0130304	0.0145585	0.0166114	0.0131758	0.00729755	0.0139891	0.0258068	0.0367126	0.015522	0.0174794	0.0103697	0.00267744
	675.39	0.0084662	0.0149302	0.0105261	0.0142251	0.010468	0.0235956	0.0162541	0.00421622	0.0126841	0.0154435	0.00949426	0.00849136	0.0256116	0.0280404	0.0144238	0.014458	0.00649317	0.00167653
	676.015	0.00291934	0.0160919	0.0114895	0.0148282	0.00738916	0.0167396	0.0170882	0.0205766	0.0137455	0.0116937	0.0047161	0.00941336	0.0271483	0.0322031	0.0101223	0.014411	0.00760477	0.00196354
	676.64	0.0126409	0.0164146	0.0180412	0.0122898	-0.000820967	0.00906323	0.0146986	0.0139099	0.0160542	0.00890741	0.00984177	0.0101874	0.0143913	0.0294568	0.00825522	0.0128887	0.00625561	0.00161519
	677.266	0.0105973	0.0140912	0.0150544	0.0157581	-0.000923645	0.0219353	0.0168628	0.0142703	0.0160011	0.00952989	0.00914677	0.00861657	0.025197	0.0234441	0.0132706	0.0141901	0.00632885	0.0016341
	677.891	0.00686053	0.0127789	0.0136092	0.0106059	0.0114942	0.0254317	0.00599665	0.0118558	0.014462	0.0166884	0.00902264	0.0109045	0.0209284	0.00728471	0.00889588	0.0124546	0.00513077	0.00132476
	678.516	-0.00178079	0.0186735	0.011056	0.0177185	-0.00800493	0.0334596	0.00640244	0.0165765	0.0163726	0.00546894	0.0113186	0.0110752	0.01966	0.0281271	0.0135452	0.0133112	0.0101307	0.00261574
	679.141	0.000175162	0.0134028	0.0183544	0.0173917	0.00667072	0.0266622	0.00820594	0.0148108	0.0279156	0.0168959	0.00656532	0.00928814	0.0212698	0.0313936	0.00633329	0.0150224	0.00874918	0.00225903
	679.766	-0.0114731	0.0154465	0.0148136	0.0105808	-0.0113916	0.0201187	0.00468913	0.0111712	0.0179647	0.00692138	0.00769471	0.00792223	0.0162207	0.021883	0.0111656	0.00958184	0.00953946	0.00246308
	680.392	0.0297775	0.0165006	0.016596	0.0118374	-0.000410406	0.017892	0.0140223	0.0123243	0.0188669	0.0117679	0.00842694	0.0120996	0.0187575	0.0223167	0.00907894	0.014657	0.00665883	0.0017193
	681.017	0.00756118	0.0180496	0.0166442	0.0139737	-0.0067734	0.024709	-0.000856655	0.0137297	0.0114104	0.0065657	0.0117406	0.0103353	0.0229041	0.0211892	0.00408184	0.0116843	0.00841138	0.00217181
	681.642	-0.020348	0.00933677	0.0115618	0.0130438	0.00708128	0.023576	0.00502729	0.0126847	0.0120472	0.0131906	0.0109587	0.00797914	0.0167573	0.0216807	0.00457605	0.00994357	0.00962204	0.0024844
	682.267	0.0168448	0.0177054	0.0155362	0.01327	0.00954434	0.0247871	0.00962623	0.00464865	0.0157357	0.0108045	0.00752094	0.0107906	0.0168061	0.0173156	0.00373408	0.012978	0.00542586	0.00140095
	682.892	0.000963391	0.0118753	0.0178726	0.00887179	-0.0067734	0.0204508	0.0170431	0.0178739	0.0212551	0.0109082	0.0060937	0.00968654	0.0183184	0.0220854	0.0076512	0.0122784	0.00790089	0.00204
	683.518	-0.00715244	0.0103264	0.0150544	0.00753977	0.00492611	0.0166615	0.00899499	0.0138738	0.0134802	0.00944096	0.00879926	0.0124639	0.0195136	0.0313069	0.00635158	0.0114387	0.00799475	0.00206424
	684.143	-0.00216036	0.0103264	0.0113209	0.014024	0.00513147	0.0115829	0.0122188	0.0119639	0.0149662	0.00902597	0.00462923	0.00910601	0.0235871	0.0245136	0.00481402	0.0110033	0.00664936	0.00171686
	684.768	-0.00467096	0.0106491	0.0100202	0.0111086	-0.0033867	0.0120127	0.00689842	0.0133334	0.0146212	0.00336437	0.00623023	0.0118151	0.0146352	0.0191369	0.00975618	0.00903492	0.00629721	0.00162593
	685.393	-0.000175162	0.0148872	0.0114895	0.012893	0.00400246	0.022951	0.00917533	0.0153153	0.0171952	0.00892221	0.00553523	0.00858243	0.0241481	0.0177492	0.00841998	0.0120727	0.00655127	0.00169153
	686.019	0.00948792	0.00985309	0.0132961	0.0135967	0.00102632	0.0244941	0.00464406	0.00663059	0.0178851	0.0111898	0.00896061	0.00443918	0.0219528	0.005001	0.0181396	0.0113731	0.00661389	0.0017077
	686.644	-0.00834941	0.00795988	0.00780422	0.00902258	-0.00502863	0.0200211	0.00665041	0.0134054	0.0128964	0.0104932	0.0101024	0.00957269	0.0159524	0.0133842	0.00563771	0.00863497	0.00703575	0.00181662
	687.269	0.0206983	0.00787385	0.00982754	0.0150544	0.00533667	0.0272678	0.00689842	0.00472076	0.0107735	0.00366079	0.00290413	0.00693196	0.0179525	0.0239644	0.00693733	0.0113868	0.00748906	0.00193367
	687.894	-0.0115315	0.015425	0.00744291	0.0177185	-0.00194997	0.0227362	0.00730421	0.00634232	0.00456416	0.0093965	0.0102886	0.00853689	0.0138059	0.0250918	0.00583905	0.0094007	0.00883597	0.00228144
	688.519	0.00134292	0.0192113	0.0110319	0.0118877	0.00646552	0.0144543	0.00640244	0.0127207	0.00984475	0.00291972	0.00826559	0.0094361	0.0169769	0.0157546	0.0021782	0.00992617	0.00525021	0.0013556
	689.144	0.00715244	0.0215778	0.0153676	0.011762	0.00441302	0.0238104	0.0160287	0.0168288	0.0130025	0.00868509	0.0065653	0.00734173	0.0141962	0.0152632	0.0111107	0.0128737	0.00536201	0.00138447
	689.77	-0.0241139	0.0205452	0.0117063	0.0099525	-0.0206281	0.0190445	0.00527526	0.0107388	0.0165053	0.00517252	0.00696246	0.00771735	0.0176842	0.023155	0.00353274	0.00755	0.0131265	0.00338925
	690.395	0.00566356	0.0156401	0.00932171	0.0116112	-0.00615764	0.0257442	0.0117453	0.0072793	0.0150989	0.0111009	0.0100651	0.00794501	0.0109276	0.021565	0.00215992	0.0106474	0.0072769	0.00187889
	691.02	-0.00251069	0.0117678	0.00790054	0.0102541	0.00389994	0.0173256	-0.00018034	0.00695492	0.0158684	0.00672872	0.00455477	0.00884422	0.0132449	0.01032	0.00307512	0.00786986	0.00538238	0.00138972
	691.645	0.0180417	0.0131876	0.0147654	0.0103043	0.0114942	0.0144933	0.00820597	0.0174054	0.0212551	0.00603215	0.00796773	0.00674985	0.012757	0.0262481	0.00631498	0.0130149	0.00568078	0.00146677
	692.27	-0.0190051	0.0143924	0.0136574	0.00972631	-0.00667072	0.0137706	0.0162766	0.00594595	0.0116758	0.00752903	0.0102141	0.00700025	0.018294	0.0192525	0.00155587	0.008241	0.00972711	0.00251153
	692.896	0.0269165	0.0138545	0.0115136	0.0112845	-0.00636299	0.0195718	0.00626718	0.00428827	0.0150458	0.00797369	0.00775674	0.00734173	0.0123668	0.0218252	0.00750475	0.0111432	0.00767948	0.00198283
	693.521	-0.0040871	0.0112514	0.013537	0.018774	-0.00533667	0.00812562	0.00410297	-0.00277481	0.0180178	0.00564679	0.0127459	0.00847998	0.0157573	0.0111872	0.00406355	0.00796606	0.00742533	0.00191721
	694.146	-0.0275296	0.014586	0.0120195	0.0100279	0.00256573	0.00564498	0.00245729	0.00486487	0.0180974	0.00930755	0.00256904	0.0098345	0.0145864	0.0180961	0.00150096	0.00657524	0.0106309	0.0027449
	694.771	0.00449584	0.0132306	0.00768376	0.011184	0.000923645	0.0159583	0.0049371	0.00245043	0.007775	0.00869992	0.00760783	0.00754661	0.0115618	0.00745816	-0.000347763	0.00741102	0.00433456	0.00111918
	695.396	-0.0113564	0.0112945	0.0113932	0.0103043	-0.00441302	0.0132823	0.00514	0.00709914	0.0104551	0.00852205	0.00621781	0.00753524	0.0103666	0.0179227	0.0067726	0.00736907	0.00684403	0.00176712
	696.022	0.00610146	0.0114665	0.00833411	0.0110081	-0.00574708	0.0256075	-0.000247971	0.00753151	0.0169298	0.00536518	0.00650325	0.00544083	0.0101715	0.0113318	0.00615024	0.00839645	0.00685268	0.00176935
	696.647	0.0141297	0.00740058	0.00850273	0.0128176	0.0101601	0.011329	0.00978402	0.0151351	0.0164522	0.00979666	0.00557246	0.00784255	0.0130741	0.0169977	0.00750475	0.0110999	0.00341199	0.000880972
	697.272	-0.00525486	0.0118323	0.00951439	0.0106311	-0.00985222	0.0098836	0.00660534	0.00472076	0.00825261	0.00300865	0.00326403	0.00743278	0.020221	0.0172578	0.00239785	0.00666101	0.0074019	0.00191116
	697.897	-0.0196473	0.0197922	0.00932171	0.0106814	0.00164209	0.00740293	0.00234455	0.00407205	0.0158153	0.0067139	0.00186162	0.00594168	0.0127814	0.0230104	0.00829184	0.00733505	0.00947571	0.00244662
	698.523	0.00986749	0.0117247	0.00423935	0.00512705	0.00143673	0.0136144	0.0106407	0.0173334	0.0109062	0.00907043	0.00726032	0.00474651	0.0172452	0.0204088	0.00388053	0.00983345	0.00538617	0.0013907
	699.148	0.0114731	0.0158337	0.00794874	0.00957551	0.00389994	0.017599	0.00861173	0.0120361	0.0164256	0.00861099	0.000968042	0.0061238	0.0100739	0.0179516	0.0072119	0.0102896	0.00483865	0.00124933
	699.773	0.00169325	0.0101327	0.00727429	0.00741412	0.000820967	0.0133214	0.000789023	0.0169369	0.00989781	0.00367559	0.00423208	0.00847998	0.010513	0.0161882	0.00697393	0.00788955	0.00495229	0.00127868
	700.398	-0.00116776	0.00774477	0.0105261	0.00630826	0.00102632	0.0170131	0.00897244	0.0115316	0.011888	0.00886294	0.00651567	0.00737587	0.0140498	0.0188188	0.00435643	0.00892149	0.00522354	0.00134871
	Hv1-A197Anap
	Wavelenght (nm)	Cell_1	Cell_2	Cell_3	Cell_4	Cell_5	Cell_6	Cell_7	Cell_8	Average	S.D.	S.E.M.
	405.929	0.0190597	0.000564455	0.0492454	0.00495081	0.0175881	0.0316	0.00181769	0.0498153	0.0218302	0.0186866	0.00660672
	406.554	0.0166611	-0.00135402	-0.0103078	0.000216235	0.034875	0.0389476	0.00585699	0.0342881	0.0148979	0.0178651	0.00631627
	407.179	0.0346419	0.0046265	0.12026	0.00796197	0.00579625	0.0387649	-0.000134307	0.0368779	0.0310994	0.0369226	0.0130541
	407.805	0.0257738	0.00197432	-0.0538263	-0.0017202	0.00989275	0.0325168	0.00881882	0.0347203	0.00726878	0.0264202	0.00934095
	408.43	0.0409964	0.00513341	0.00629633	0.00925292	0.0114906	-0.00275656	-0.00148041	0.0483079	0.0146551	0.0179917	0.00636104
	409.055	0.00719234	0.00761634	-0.0183221	-0.0240957	0.0126897	0.0183716	0.00430893	0.013156	0.00261465	0.0144115	0.00509525
	409.68	0.0216957	0.00214442	-0.0469579	0.0178604	0.010293	0.0185552	0.000134307	0.0575798	0.0101631	0.0272459	0.00963289
	410.305	0.0577797	0.00784144	0.156332	0.0288303	0.0145888	0.0108391	-0.0025589	0.018115	0.0364709	0.048341	0.0170911
	410.93	0.0336853	0.0155145	-0.0532542	0.00150719	0.0197855	0.0297611	0.00100983	0.0605979	0.0135759	0.0310032	0.0109613
	411.556	0.00719234	0.0111706	0.0372257	-0.0103276	0.0259805	0.0319673	0.00727075	0.0398951	0.0187968	0.0165217	0.0058413
	412.181	0.00755196	-0.000451057	0.0229064	-0.0279718	0.0263807	0.00477761	0.00531876	0.0353663	0.00923487	0.0183028	0.00647101
	412.806	0.028888	-0.00631902	-0.00171539	-0.013555	0.0146892	0.0282923	0.00228928	0.0153104	0.00848498	0.0147523	0.00521573
	413.431	0.0599356	0.00242623	-0.0641401	-0.00322739	0.00379822	0.0235147	0.00969434	0.0347216	0.00834039	0.0336024	0.0118802
	414.057	0.0673671	0.00609307	-0.023476	0.0357175	0.00139848	0.0431721	-0.00760702	0.0204871	0.017894	0.0278031	0.00982989
	414.682	0.0268526	0.0120169	-0.125981	0.0213008	0.0167877	0.0440909	0.0151474	0.00366505	0.00173507	0.0495416	0.0175156
	415.307	0.0280501	-0.00304654	-0.0715849	0.0124803	0.0398708	0.0259047	0.00457754	0.0532678	0.01119	0.0356961	0.0126205
	415.932	-0.0248136	-0.00265133	-0.0332168	-0.0382994	0.0152888	-0.00055032	-0.00262555	0.0202704	-0.00832473	0.0202804	0.00717022
	416.557	0.00371664	0.00315909	0.0286359	0.00602554	0.0148886	0.0253536	0.00107648	0.0465814	0.0161796	0.0150886	0.00533463
	417.183	0.0266117	0.0132017	0.0406556	0.00387287	0.0180858	0.0145125	0.00161572	0.0338566	0.0190515	0.0129095	0.00456419
	417.808	0.0312867	0.0122987	0.0211885	0.0204391	0.0100936	0.0146982	0.011916	0.0213508	0.0179089	0.00658356	0.00232764
	418.433	0.0123475	0.0088578	0.0509694	0.0271101	0.0152888	0.0117587	0.0303625	0.0448563	0.0251939	0.0149661	0.00529133
	419.058	-0.00851034	-0.00321579	0.0154591	0.00946593	0.0295778	0.0451948	0.023428	0.0360142	0.0184267	0.0175297	0.00619768
	419.683	0.0190597	0.00411875	-0.103078	0.0107569	0.0185864	0.008451	0.0245055	0.087556	0.00874455	0.0489804	0.0173172
	420.308	0.0176212	0.000789561	-0.0973543	0.0139843	0.0133897	0.0106564	0.0261878	0.0427006	0.00349691	0.0398257	0.0140805
	420.934	0.0206186	0.0127498	0.0406616	0.0058093	0.0141901	0.0345376	0.0319105	0.0595207	0.0274998	0.0165079	0.00583644
	421.559	0.0222963	0.00507756	0.0400861	0.028401	0.0318757	0.00771688	0.0459804	0.0668541	0.031036	0.019006	0.00671964
	422.184	0.0517849	0.00626232	-0.0183246	0.0518512	0.0320765	0.0400491	0.0509629	0.105024	0.0399608	0.0339676	0.0120094
	422.809	0.0835499	-0.00558532	-0.00286298	0.0182896	0.0154882	0.0343557	0.0754674	0.0959675	0.0393337	0.0375876	0.0132892
	423.435	0.0262521	0.0136536	0.0389436	0.0247412	0.0132908	0.0282912	0.085296	0.127452	0.04474	0.0378936	0.0133974
	424.06	0.0383586	0.0189562	0.0652826	0.00043247	0.0308774	0.0343538	0.12845	0.128747	0.0556822	0.0454111	0.0160553
	424.685	0.0902639	0.00598052	0.0773083	0.0256029	0.0588559	0.0301284	0.126162	0.139312	0.0692017	0.045001	0.0159103
	425.31	0.0563394	0.0142739	-0.00286298	0.0587385	0.0699478	0.0569508	0.124747	0.138665	0.0645999	0.0452451	0.0159965
	425.935	0.181488	0.0332868	-0.024054	0.0318446	0.0478644	0.0448275	0.153292	0.197757	0.0832882	0.0766891	0.0271137
	426.56	0.092062	0.0381384	0.00973827	0.0348558	0.0571576	0.0753243	0.181163	0.228164	0.0895754	0.0714748	0.0252702
	427.186	0.123708	0.0914528	-0.129992	0.0576638	0.116516	0.0497878	0.204659	0.211773	0.090696	0.100544	0.0355475
	427.811	0.10405	0.0692808	0.0372197	0.200744	0.0789427	0.0461117	0.238117	0.226654	0.12514	0.0778296	0.0275169
	428.436	0.11256	0.0829335	0.174087	0.0197936	0.12281	0.077527	0.178403	0.251452	0.127446	0.0675046	0.0238665
	429.061	0.139291	0.125416	0.0366467	0.11597	0.154087	0.128602	0.230846	0.246279	0.147142	0.0621904	0.0219876
	429.687	0.224401	0.111199	0.162061	0.134259	0.142096	0.12658	0.244378	0.293505	0.17981	0.0616818	0.0218078
	430.312	0.162306	0.139464	0.137434	0.100262	0.152089	0.172693	0.278914	0.355183	0.187293	0.0798483	0.0282306
	430.937	0.351346	0.192101	0.0601287	0.173634	0.226034	0.183165	0.322808	0.311406	0.227578	0.0905519	0.0320149
	431.562	0.181846	0.180592	0.147175	0.143509	0.238625	0.173245	0.264305	0.291348	0.202581	0.0516262	0.0182526
	432.187	0.291889	0.194471	0.217036	0.246143	0.265704	0.196577	0.301602	0.356909	0.258791	0.0530498	0.0187559
	432.812	0.283019	0.235937	0.0326439	0.272392	0.172074	0.221009	0.331964	0.352812	0.237731	0.0948884	0.0335481
	433.438	0.285896	0.210211	0.209016	0.244207	0.2744	0.240299	0.328732	0.370495	0.270407	0.0532219	0.0188168
	434.063	0.332765	0.277404	0.35218	0.303591	0.300581	0.295231	0.367375	0.357341	0.323308	0.0312729	0.0110566
	434.688	0.291051	0.153286	0.229058	0.0563728	0.319266	0.317829	0.335666	0.387747	0.261285	0.102263	0.0361554
	435.313	0.315744	0.308152	0.179241	0.3946	0.340251	0.369635	0.390265	0.419663	0.339694	0.0708674	0.0250554
	435.938	0.35662	0.192834	0.512522	0.211933	0.337752	0.382678	0.389927	0.42635	0.351327	0.0992775	0.0350999
	436.564	0.391623	0.311085	0.271438	0.496805	0.34175	0.363939	0.402247	0.419881	0.374846	0.0651032	0.0230174
	437.189	0.368009	0.282877	0.50565	0.249154	0.390314	0.418871	0.406556	0.452874	0.384288	0.0790343	0.0279429
	437.814	0.426028	0.231085	0.558338	0.391373	0.381421	0.460758	0.380907	0.467108	0.412127	0.0880932	0.0311457
	438.439	0.532473	0.316445	0.279455	0.395462	0.521119	0.52065	0.419415	0.427859	0.42661	0.0893006	0.0315725
	439.065	0.379635	0.323948	0.450106	0.31112	0.35484	0.496584	0.474753	0.468403	0.407424	0.0687412	0.0243037
	439.69	0.349307	0.290381	0.499357	0.418053	0.402505	0.529284	0.450045	0.465598	0.425566	0.0733853	0.0259456
	440.315	0.52576	0.435259	0.335003	0.562427	0.359837	0.548208	0.439208	0.493634	0.462417	0.0793586	0.0280575
	440.94	0.538347	0.350915	0.292627	0.357165	0.364933	0.577785	0.452537	0.527275	0.432698	0.0988408	0.0349455
	441.565	0.345592	0.402425	0.427197	0.283581	0.460463	0.57154	0.481889	0.504416	0.434638	0.0854042	0.0301949
	442.19	0.386108	0.298279	0.289763	0.372008	0.428487	0.590828	0.458395	0.514983	0.417356	0.0967755	0.0342153
	442.816	0.45192	0.365697	0.457551	0.35458	0.57288	0.581644	0.49017	0.53892	0.47667	0.0810342	0.0286499
	443.441	0.584257	0.336868	0.483323	0.504118	0.457666	0.649802	0.560454	0.607931	0.523052	0.0930669	0.0329041
	444.066	0.554889	0.484568	0.474727	0.387287	0.421191	0.626653	0.505453	0.547762	0.500316	0.071725	0.0253586
	444.691	0.423868	0.466403	0.600144	0.339308	0.516622	0.652006	0.531506	0.552077	0.510242	0.0928865	0.0328403
	445.317	0.504663	0.410436	0.458698	0.342532	0.541403	0.701427	0.549211	0.588305	0.512085	0.103612	0.0366324
	445.942	0.625374	0.408913	0.578953	0.618151	0.516723	0.694445	0.580987	0.554017	0.572195	0.0791177	0.0279723
	446.567	0.53547	0.467982	0.420328	0.466897	0.457364	0.698854	0.552981	0.587875	0.523469	0.0845653	0.0298984
	447.192	0.513413	0.473229	0.429488	0.532948	0.557292	0.706938	0.658205	0.580757	0.556534	0.0859083	0.0303732
	447.817	0.466904	0.443723	0.443232	0.53381	0.543802	0.715389	0.596538	0.592836	0.542029	0.0871391	0.0308083
	448.442	0.608352	0.479152	0.615028	0.58803	0.557092	0.717775	0.606906	0.681901	0.60678	0.0681384	0.0240906
	449.068	0.64839	0.519265	0.639655	0.461517	0.712379	0.770135	0.653695	0.67996	0.635624	0.0937475	0.0331448
	449.693	0.613507	0.580253	0.588113	0.505625	0.534708	0.778034	0.653089	0.71015	0.620435	0.0845505	0.0298931
	450.318	0.764906	0.56107	0.656262	0.465822	0.597163	0.804858	0.646491	0.653865	0.643805	0.100974	0.0356996
	450.943	0.604876	0.5965	0.487332	0.603951	0.670009	0.793283	0.644471	0.674783	0.634401	0.0814774	0.0288066
	451.568	0.683032	0.565528	0.522833	0.556402	0.690994	0.785752	0.665072	0.679314	0.643616	0.0821798	0.0290549
	452.194	0.663612	0.462058	0.558907	0.464744	0.703585	0.790711	0.70257	0.715326	0.632689	0.114799	0.0405875
	452.819	0.631968	0.522368	0.759909	0.334357	0.689395	0.819556	0.665812	0.71619	0.642444	0.142654	0.0504357
	453.444	0.722352	0.612805	0.92713	0.578132	0.685598	0.831128	0.750301	0.766867	0.734289	0.105795	0.037404
	454.069	0.61998	0.582565	0.799997	0.53209	0.686298	0.854276	0.724921	0.747892	0.693502	0.103049	0.0364334
	454.695	0.588454	0.549561	0.540016	0.55167	0.681101	0.863463	0.682777	0.677589	0.641829	0.102149	0.0361153
	455.32	0.709165	0.699857	0.711809	0.550593	0.73726	0.853174	0.740876	0.769242	0.721497	0.0791872	0.0279969
	455.945	0.642877	0.545838	0.751898	0.484108	0.636335	0.899838	0.74229	0.791884	0.686883	0.12707	0.0449261
	456.57	0.695859	0.597855	0.799997	0.435484	0.731563	0.879261	0.763025	0.853562	0.719576	0.136032	0.0480945
	457.195	0.760831	0.635992	0.764496	0.69152	0.732064	0.900023	0.764978	0.822077	0.758998	0.0744526	0.026323
	457.82	0.903479	0.607784	0.718678	0.636654	0.741957	0.910125	0.828799	0.748538	0.762002	0.105103	0.0371596
	458.446	0.76107	0.772579	0.92083	0.860422	0.722171	0.947238	0.836002	0.858736	0.834881	0.0735418	0.026001
	459.071	0.721272	0.817036	0.844662	0.647201	0.888348	0.930152	0.789482	0.818843	0.807125	0.0841392	0.0297477
	459.696	0.801587	0.763326	0.619039	0.491638	0.870462	0.921332	0.804294	0.869737	0.767677	0.134811	0.0476627
	460.321	0.70581	0.679433	0.786829	0.753489	0.765939	0.955321	0.80362	0.87103	0.790184	0.0831544	0.0293995
	460.947	0.878904	0.768235	0.901933	0.63343	0.756746	0.941725	0.821393	0.862187	0.820569	0.0923767	0.0326601
	461.572	0.889333	0.816077	0.660846	0.810504	0.880355	0.945217	0.869192	0.885263	0.844598	0.0801585	0.0283403
	462.197	0.888494	0.735343	0.822906	0.749613	0.809107	0.969284	0.894571	0.894751	0.845509	0.0751401	0.026566
	462.822	0.79823	0.796669	0.913953	1.10204	0.824195	0.973508	0.872086	0.861757	0.892805	0.0968428	0.0342391
	463.447	0.829157	0.839264	0.887617	0.819328	0.91423	0.965058	0.830885	0.901867	0.873426	0.0486504	0.0172005
	464.072	0.916305	0.831874	0.94087	0.969724	0.846081	0.984714	0.869663	0.910711	0.908743	0.0523763	0.0185178
	464.698	0.776894	0.752043	0.879027	0.691952	0.824296	0.940624	0.831222	0.86607	0.820266	0.0734618	0.0259727
	465.323	0.867877	0.813482	1.04967	0.653653	0.910433	0.980123	0.878483	0.900144	0.881734	0.109504	0.0387155
	465.948	0.9024	0.984426	0.779382	0.735415	0.86207	0.999779	0.863334	0.952764	0.884946	0.0883745	0.0312451
	466.573	0.948791	0.85241	0.855548	0.707227	1.03184	0.953299	0.952604	0.858521	0.89503	0.0923961	0.032667
	467.199	0.954904	0.898616	0.777667	1.09731	0.939011	0.984348	0.926482	0.97519	0.944191	0.0838765	0.0296548
	467.824	1.0128	0.821663	0.793123	0.740363	0.980081	1.0154	0.945602	0.915024	0.903007	0.0985709	0.0348501
	468.449	0.783485	0.832212	1.06971	0.852889	0.937114	1.00602	0.98384	1.00107	0.933294	0.0936675	0.0331164
	469.074	1.08185	0.889701	0.888759	0.965848	0.986777	1.01742	0.902515	0.971093	0.962995	0.0635097	0.0224541
	469.699	1.00273	0.901549	0.971797	0.82535	0.962595	1.02605	0.948967	1.00711	0.955769	0.0613183	0.0216793
	470.325	1.11853	0.858051	1.16478	0.856978	0.975884	1.00345	0.984043	0.956429	0.989768	0.102295	0.0361668
	470.95	1.02275	0.803552	0.804579	0.934652	0.989275	1.03009	1.00552	0.958586	0.943626	0.085813	0.0303395
	471.575	0.903838	0.857487	1.0806	0.976824	0.974687	1.01411	0.969702	0.952546	0.966224	0.0627234	0.0221761
	472.2	0.983314	0.904878	0.960341	1.18209	0.985179	0.996289	0.99993	0.975191	0.998401	0.0749027	0.0264821
	472.825	1.11098	0.90516	1.07716	0.711962	1.07152	0.971672	0.941023	0.964625	0.969262	0.119016	0.0420785
	473.45	1.02851	0.983185	0.9466	0.744881	0.973987	1.01172	0.939273	1.04744	0.959448	0.0884794	0.0312822
	474.076	0.862601	0.924736	1.14244	0.688725	1.07391	1.00511	0.964856	0.990072	0.956557	0.129156	0.0456636
	474.701	0.997938	0.989165	0.80916	1.1965	1.00916	1.00603	1.02686	0.990935	1.00322	0.0974652	0.0344592
	475.326	0.926733	0.842085	1.15275	0.941752	0.91523	0.978469	1.00505	1.00862	0.971335	0.0852984	0.0301575
	475.951	0.823883	1.04344	1.10923	1.0943	0.972387	0.966342	0.970847	1.06706	1.00594	0.0870975	0.0307936
	476.577	1.01856	0.956274	0.922546	0.927768	1.03134	0.985083	0.99091	1.0304	0.98286	0.0408265	0.0144344
	477.202	0.859845	0.993904	0.846386	1.29676	1.05613	1.00015	1.08119	1.00236	1.01709	0.131699	0.0465628
	477.827	1.09036	0.998643	1.07029	1.10829	1.02405	1.01154	1.04813	0.985758	1.04213	0.0416287	0.014718
	478.452	0.737814	0.972183	0.928269	0.951434	1.08501	1.02127	0.990506	1.03083	0.964664	0.0973072	0.0344033
	479.077	0.936562	1.0255	1.11152	1.03836	1.04314	0.999413	0.983032	0.936373	1.00924	0.0548842	0.0194045
	479.702	0.980556	0.997684	1.01131	1.20683	1.04144	0.98839	0.99542	1.08863	1.03878	0.0715755	0.0253058
	480.328	0.976961	1.00259	1.21747	0.813089	1.05693	0.995739	1.01043	1.0524	1.0157	0.104227	0.0368497
	480.953	1.01652	0.96688	0.720969	0.883659	0.944409	1.01282	0.978589	1.03126	0.944388	0.0953367	0.0337066
	481.578	1.23936	0.999941	0.84524	1.03685	1.00566	0.974058	0.944928	1.05973	1.01322	0.105184	0.037188
	482.203	1.18206	1.05579	0.954045	0.861929	0.991173	0.988205	0.968357	1.00754	1.00114	0.085659	0.030285
	482.829	0.990625	0.947528	1.00616	0.99877	0.942709	0.953666	1.02592	0.959232	0.978075	0.0291502	0.0103061
	483.454	1.0128	1.02318	0.932281	0.783394	1.04414	0.954402	1.02841	1.01077	0.973672	0.08032	0.0283974
	484.079	1.01005	0.916161	1.05654	0.783394	1.08131	0.96414	0.982965	1.07353	0.983511	0.0926445	0.0327548
	484.704	1.03654	1.02939	1.08633	1.02093	0.945008	0.963405	1.02592	1.0222	1.01621	0.0411002	0.0145311
	485.329	1.0912	0.966937	0.908232	1.00888	0.971488	0.97259	0.990034	0.927963	0.979666	0.0517876	0.0183097
	485.954	0.936562	0.942	1.03307	0.817604	0.989575	0.923721	1.02376	0.988131	0.956803	0.0646674	0.0228634
	486.58	0.95802	1.08333	1.02047	0.827932	0.973786	0.968549	0.994275	1.03256	0.982364	0.0698327	0.0246896
	487.205	1.18626	0.961407	0.970079	1.11237	0.927921	0.918395	1.00592	1.00646	1.0111	0.0870698	0.0307838
	487.83	0.906715	1.09275	1.08518	0.968	0.99677	0.931621	1.01232	1.00279	0.999518	0.0616713	0.0218041
	488.455	1.02143	1.00846	0.995276	1.02072	1.03984	0.880365	0.978926	1.03471	0.997466	0.0480618	0.0169924
	489.08	0.960537	1.05986	0.925412	1.0205	0.84558	0.92409	1.01306	0.983817	0.966606	0.0634851	0.0224454
	489.706	1.13195	1.05399	0.844089	1.14788	0.994072	0.863647	0.991313	0.966135	0.999134	0.10389	0.0367308
	490.331	0.870633	0.995258	0.808591	1.24426	0.955	0.885692	1.02376	0.988129	0.971416	0.123654	0.0437182
	490.956	1.07574	0.984651	0.931133	1.06396	1.12508	0.887345	1.00612	1.00107	1.00939	0.0728646	0.0257615
	491.581	0.902639	0.995935	1.01474	1.01254	0.934715	0.870444	0.97482	0.966779	0.959077	0.049063	0.0173464
	492.207	0.915465	0.979969	0.800001	1.0659	0.910932	0.878343	1.06994	1.00582	0.953296	0.0881042	0.0311496
	492.832	0.937283	0.979461	1.00443	0.916578	1.01216	0.88165	0.962499	0.924082	0.952268	0.0424734	0.0150166
	493.457	0.942076	0.933086	0.820043	0.999845	1.00606	0.879446	1.03709	0.970231	0.948485	0.0669132	0.0236574
	494.082	1.0749	1.01704	1.0577	0.848374	1.00247	0.92464	1.00693	0.994817	0.990857	0.0682918	0.0241448
	494.707	1.04205	0.948939	1.13214	0.980694	0.918028	0.862544	0.997439	1.03406	0.989487	0.0775447	0.0274162
	495.332	0.905397	1.05224	0.846955	1.05407	0.891348	0.833885	0.97731	1.04248	0.95046	0.0866811	0.0306464
	495.958	1.11757	0.980138	0.796561	0.904531	0.94131	0.830578	0.909584	0.944999	0.928159	0.0913637	0.032302
	496.583	0.912349	0.866006	1.09148	1.12464	0.950704	0.80155	0.969501	0.965702	0.960241	0.100507	0.0355344
	497.208	0.9784	1.02008	0.804576	0.817607	1.02365	0.749744	0.947217	0.932492	0.909221	0.0980637	0.0346708
	497.833	0.836349	0.899293	0.922548	1.09366	0.871462	0.822862	0.925741	0.918257	0.911271	0.0781084	0.0276155
	498.459	1.03198	0.821774	0.777664	1.09774	1.06862	0.790529	0.937591	0.961389	0.935911	0.11879	0.0419985
	499.084	0.953946	1.03345	0.91338	1.09172	0.869464	0.771973	0.913893	0.903378	0.931401	0.0917161	0.0324265
	499.709	0.843782	0.882366	0.842946	1.07235	0.92712	0.758377	0.963913	0.990071	0.910116	0.0926035	0.0327403
	500.334	0.96785	0.888967	0.913958	1.02652	0.85927	0.773076	0.978186	0.92559	0.916677	0.0735185	0.0259927
	500.959	0.846059	0.91114	0.892198	0.991454	0.959297	0.738352	0.901237	0.930119	0.896232	0.0723705	0.0255868
	501.584	0.679916	1.01986	1.07316	1.11646	0.894845	0.716859	0.927021	0.994601	0.927839	0.148613	0.0525428
	502.21	0.978757	0.953115	0.889902	1.09968	0.971788	0.693711	0.90642	0.940472	0.929231	0.106976	0.0378217
	502.835	0.897006	0.870463	0.747311	0.822552	0.880155	0.733943	0.92554	0.861757	0.842341	0.064885	0.0229403
	503.46	0.879023	0.888065	0.928275	0.928843	0.875558	0.713735	0.859429	0.896909	0.87123	0.0637767	0.0225485
	504.085	0.987989	0.874976	0.855548	0.899367	0.811005	0.705834	0.926011	0.849032	0.86372	0.0780302	0.0275879
	504.711	0.931288	0.888629	0.790265	0.717771	0.947705	0.707671	0.886628	0.861757	0.841464	0.0864966	0.0305812
	505.336	0.877227	0.903636	0.84295	0.80147	0.886849	0.690035	0.871345	0.854856	0.841046	0.0640385	0.022641
	505.961	0.838987	0.898616	0.850391	1.09559	0.87396	0.68232	0.850948	0.882244	0.871632	0.105349	0.0372466
	506.586	0.73206	0.809588	1.08804	0.965848	0.829392	0.654763	0.924531	0.886556	0.861347	0.12749	0.0450746
	507.211	0.837787	0.795089	0.866998	0.955523	0.813004	0.644842	0.877741	0.856795	0.830973	0.0836408	0.0295715
	507.837	0.863441	0.815062	0.712952	0.718849	0.946107	0.650354	0.830145	0.755008	0.78649	0.0891827	0.0315309
	508.462	0.873391	0.844116	0.806867	0.928197	0.83179	0.630327	0.891744	0.828115	0.829318	0.0836246	0.0295658
	509.087	0.822684	0.818051	0.730136	1.13217	0.84588	0.617468	0.860508	0.864991	0.836486	0.136343	0.0482045
	509.712	0.750043	0.795879	0.652823	1.03362	0.980781	0.637126	0.869663	0.781748	0.812711	0.133162	0.0470798
	510.337	0.661937	0.82437	0.688903	0.798672	0.839985	0.583665	0.782751	0.818196	0.74981	0.0872321	0.0308412
	510.962	0.940519	0.865668	0.919112	0.958318	0.79172	0.607364	0.784367	0.843209	0.838785	0.106398	0.0376175
	511.588	0.924216	0.812354	0.776521	1.2305	0.841684	0.609385	0.809005	0.835448	0.854889	0.164609	0.0581979
	512.213	0.828558	0.797233	0.846953	0.895707	0.794617	0.564926	0.807795	0.798354	0.791768	0.0915135	0.0323549
	512.838	0.749563	0.765132	0.632213	0.859131	0.623243	0.597993	0.749831	0.831565	0.726084	0.0916944	0.0324189
	513.463	0.833474	0.787924	0.843517	1.08462	0.729165	0.55078	0.805034	0.751987	0.798312	0.138565	0.0489901
	514.088	0.891131	0.746966	0.696923	0.960255	0.780727	0.597259	0.790223	0.801158	0.78308	0.104107	0.0368074
	514.714	0.668289	0.906232	0.924839	1.0048	0.733762	0.57852	0.712265	0.767084	0.786973	0.135565	0.0479295
	515.339	0.859365	0.769194	0.603005	0.866444	0.803011	0.55225	0.753129	0.819488	0.753236	0.108493	0.0383581
	515.964	0.790438	0.746458	0.646523	0.893554	0.784324	0.528365	0.747406	0.739696	0.734596	0.10092	0.0356804
	516.589	0.712162	0.750971	0.500496	0.858485	0.676105	0.509627	0.743704	0.756734	0.688536	0.116488	0.0411847
	517.215	0.984272	0.820364	0.604725	0.855042	0.714777	0.493643	0.766189	0.72999	0.746125	0.141189	0.0499179
	517.84	0.97672	0.666571	0.868716	0.98263	0.756946	0.49052	0.725594	0.71964	0.773417	0.154548	0.054641
	518.465	0.730861	0.716669	0.743308	1.02975	0.70988	0.536817	0.741819	0.705191	0.739287	0.12649	0.0447208
	519.09	0.839586	0.762763	0.698638	0.983063	0.708681	0.51183	0.713611	0.67198	0.736269	0.12722	0.0449791
	519.715	0.855051	0.799151	0.643666	0.810504	0.679403	0.473066	0.732528	0.709937	0.712913	0.112362	0.0397261
	520.341	0.774736	0.673058	0.471291	0.821477	0.717974	0.534612	0.697723	0.66551	0.669548	0.108874	0.0384927
	520.966	1.02095	0.726881	0.412308	0.888394	0.718173	0.491623	0.660359	0.66357	0.697783	0.183236	0.0647836
	521.591	0.863202	0.627812	0.611595	0.954662	0.666013	0.480417	0.707619	0.692035	0.700419	0.138747	0.0490545
	522.216	0.630889	0.670069	0.733572	0.783181	0.658219	0.483356	0.69981	0.680823	0.66749	0.0823947	0.0291309
	522.841	0.697537	0.708264	0.53772	0.793292	0.628839	0.460575	0.68648	0.706486	0.652399	0.0997492	0.0352667
	523.466	0.672844	0.635541	0.511377	0.66226	0.623143	0.420893	0.687894	0.623028	0.604623	0.0858773	0.0303622
	524.092	0.682913	0.650266	0.330997	0.632997	0.699088	0.431365	0.700214	0.673704	0.600193	0.130664	0.0461965
	524.717	0.814414	0.658954	0.6219	0.858269	0.611753	0.428793	0.667765	0.661197	0.665381	0.122588	0.0433413
	525.342	0.534751	0.58973	0.506796	0.858915	0.554594	0.424751	0.670323	0.628417	0.596035	0.1217	0.0430275
	525.967	0.946751	0.708489	0.35218	0.532303	0.607955	0.406931	0.654502	0.583994	0.599138	0.172686	0.0610538
	526.592	0.668289	0.659744	0.738148	0.582866	0.677603	0.422363	0.631613	0.607283	0.623489	0.0879113	0.0310813
	527.218	0.512814	0.571395	0.518249	0.591471	0.569082	0.400683	0.63242	0.600599	0.549589	0.0676205	0.0239075
	527.843	0.787081	0.606261	0.491337	0.790065	0.536307	0.415381	0.603135	0.633164	0.607841	0.123354	0.0436122
	528.468	0.585816	0.681916	0.604725	0.838905	0.577077	0.381392	0.629526	0.591542	0.611363	0.118445	0.0418768
	529.093	0.466184	0.539011	0.568076	0.823413	0.493238	0.354019	0.615388	0.565879	0.553151	0.126642	0.0447749
	529.718	0.610391	0.609364	0.50909	0.565226	0.532011	0.405643	0.614514	0.599953	0.555774	0.0676662	0.0239236
	530.344	0.66673	0.549561	0.264566	0.910553	0.551196	0.361001	0.583545	0.566957	0.556764	0.180923	0.063966
	530.969	0.70449	0.594808	0.381957	0.779092	0.500434	0.365593	0.531371	0.577956	0.554463	0.134177	0.0474388
	531.594	0.570112	0.510521	0.61045	0.611697	0.502732	0.339874	0.555203	0.587228	0.535977	0.0834048	0.0294881
	532.219	0.522164	0.55148	0.398567	0.550163	0.542504	0.345936	0.535948	0.598012	0.505597	0.0807284	0.0285418
	532.845	0.598883	0.513172	0.4524	0.712178	0.526614	0.34759	0.589065	0.576878	0.539597	0.101534	0.0358977
	533.47	0.680637	0.493144	0.530848	0.742732	0.600061	0.321319	0.56079	0.553586	0.56039	0.118257	0.0418102
	534.095	0.377359	0.511254	0.38139	0.610622	0.512825	0.326095	0.576813	0.561996	0.482294	0.0994462	0.0351595
	534.72	0.534871	0.520281	0.627054	0.787699	0.554594	0.351263	0.590614	0.572347	0.56734	0.113364	0.0400802
	535.345	0.750161	0.499688	0.40487	0.727453	0.561089	0.309745	0.550019	0.563076	0.545763	0.138303	0.0488974
	535.971	0.553692	0.435259	0.420903	0.548656	0.444574	0.329035	0.513261	0.483281	0.466083	0.0700456	0.0247649
	536.596	0.665651	0.471536	0.56979	0.475072	0.426788	0.299639	0.489294	0.511534	0.488663	0.099037	0.0350149
	537.221	0.516051	0.438589	0.684894	0.793938	0.400406	0.310662	0.530361	0.524472	0.524922	0.144453	0.0510719
	537.846	0.542064	0.396839	0.456405	0.484108	0.415097	0.282739	0.499056	0.534176	0.451311	0.0799836	0.0282785
	538.471	0.716357	0.460704	0.209018	0.479377	0.456766	0.26951	0.508077	0.457403	0.444652	0.143969	0.0509008
	539.096	0.37532	0.455965	0.382536	0.504118	0.44927	0.272265	0.509559	0.498164	0.4309	0.0771616	0.0272807
	539.722	0.560043	0.459745	0.219899	0.684206	0.466458	0.283473	0.494209	0.497085	0.45814	0.13768	0.0486773
	540.347	0.54482	0.586401	0.402006	0.538758	0.433983	0.287698	0.450315	0.463657	0.463455	0.0888216	0.0314032
	540.972	0.506341	0.45478	0.347028	0.525632	0.445174	0.270614	0.53891	0.43519	0.440459	0.0859646	0.0303931
	541.597	0.383472	0.467813	0.40716	0.535317	0.412397	0.294129	0.468896	0.447483	0.427083	0.0668292	0.0236277
	542.222	0.467502	0.432947	0.44724	0.47959	0.403905	0.278512	0.456104	0.453953	0.427469	0.0602133	0.0212886
	542.848	0.49771	0.474413	0.29492	0.670006	0.357938	0.263631	0.441227	0.376532	0.422047	0.121325	0.0428947
	543.473	0.566875	0.425217	0.607014	0.554465	0.4115	0.267306	0.473743	0.43325	0.467421	0.101929	0.0360373
	544.098	0.473975	0.387249	0.311521	0.407296	0.405502	0.217334	0.444526	0.445975	0.386672	0.0787314	0.0278357
	544.723	0.457674	0.452241	0.396276	0.446025	0.336653	0.252977	0.478523	0.46646	0.410854	0.0737025	0.0260578
	545.348	0.797032	0.478532	0.234218	0.470124	0.261008	0.242872	0.424127	0.419881	0.415974	0.172897	0.0611283
	545.974	0.408646	0.33478	0.381957	0.317143	0.343749	0.229645	0.428974	0.35885	0.350468	0.0576732	0.0203906
	546.599	0.426866	0.404117	0.182673	0.396323	0.363233	0.226337	0.418203	0.438643	0.357049	0.0912141	0.0322491
	547.224	0.38383	0.398984	0.290909	0.470986	0.420192	0.225969	0.421973	0.418155	0.378875	0.0751158	0.0265574
	547.849	0.346072	0.40502	0.396847	0.464531	0.274899	0.217152	0.415645	0.462364	0.372816	0.0824725	0.0291584
	548.475	0.320778	0.311705	0.412311	0.549518	0.313371	0.237543	0.398074	0.402413	0.368214	0.0883195	0.0312257
	549.1	0.442329	0.43069	0.0337863	0.508636	0.320566	0.212374	0.400564	0.436487	0.348179	0.145778	0.0515403
	549.725	0.49687	0.348151	0.350464	0.50498	0.340351	0.209252	0.417396	0.438211	0.388209	0.0909259	0.0321471
	550.35	0.501905	0.375006	0.280601	0.47787	0.364233	0.222297	0.399824	0.427859	0.381199	0.0881302	0.0311587
	550.975	0.41224	0.394188	0.51768	0.51036	0.344948	0.185369	0.408306	0.386454	0.394943	0.0970544	0.0343139
	551.601	0.511376	0.310916	0.211307	0.467755	0.417594	0.204292	0.415847	0.405214	0.368037	0.106802	0.0377602
	552.226	0.368009	0.428208	0.296632	0.192998	0.323863	0.197126	0.408844	0.386238	0.32524	0.0850467	0.0300685
	552.851	0.391623	0.326713	0.218754	0.563935	0.306675	0.203006	0.397535	0.36683	0.346884	0.106781	0.0377529
	553.476	0.397497	0.269844	0.230782	0.435484	0.333056	0.187022	0.361114	0.38365	0.324806	0.0815692	0.0288391
	554.101	0.308192	0.329026	0.360203	0.357811	0.264107	0.191247	0.368115	0.392493	0.321399	0.0617686	0.0218385
	554.726	0.41368	0.3266	0.111665	0.514233	0.254813	0.207967	0.391073	0.335344	0.319422	0.11834	0.0418394
	555.352	0.435615	0.320563	0.219897	0.42365	0.258111	0.181694	0.354382	0.359929	0.31923	0.0865025	0.0305833
	555.977	0.40349	0.273229	0.217033	0.330485	0.318667	0.191982	0.357681	0.323915	0.30206	0.0662582	0.0234258
	556.602	0.409483	0.342849	0.339014	0.615573	0.314969	0.173794	0.320923	0.325206	0.355226	0.116058	0.0410329
	557.227	0.353144	0.295458	0.180389	0.347913	0.254214	0.161302	0.354785	0.343753	0.28637	0.074339	0.0262828
	557.852	0.474695	0.335513	0.363632	0.364908	0.323262	0.187391	0.348324	0.361223	0.344868	0.07352	0.0259932
	558.478	0.42339	0.338786	0.293769	0.261202	0.353841	0.17251	0.358152	0.343107	0.318095	0.070752	0.0250146
	559.103	0.483325	0.317799	0.248532	0.217094	0.2727	0.178571	0.324019	0.325639	0.29596	0.0866324	0.0306292
	559.728	0.229076	0.291621	0.123693	0.34038	0.225135	0.165344	0.310017	0.339871	0.253142	0.0755618	0.0267151
	560.353	0.329409	0.270803	0.178093	0.390514	0.232829	0.137604	0.324356	0.300407	0.270502	0.0784923	0.0277512
	560.978	0.333604	0.328067	0.101357	0.358027	0.250517	0.142012	0.295139	0.334048	0.267847	0.0901831	0.0318846
	561.604	0.207019	0.286544	0.155186	0.409233	0.328559	0.171038	0.295543	0.328227	0.272669	0.0821712	0.0290519
	562.229	0.388985	0.260084	0.0383707	0.497447	0.250816	0.160934	0.333309	0.317876	0.280978	0.130977	0.0463074
	562.854	0.312027	0.312721	0.173514	0.316497	0.218339	0.155606	0.313854	0.331678	0.26678	0.0675112	0.0238688
	563.479	0.330247	0.257657	0.356761	0.339089	0.180168	0.155055	0.295409	0.281429	0.274477	0.0689028	0.0243608
	564.105	0.466423	0.321579	0.238799	0.23732	0.222037	0.160935	0.309545	0.347203	0.28798	0.0883301	0.0312294
	564.73	0.274627	0.266347	0.163782	0.370933	0.194557	0.149178	0.294128	0.241534	0.244386	0.0688639	0.0243471
	565.355	0.18808	0.263921	0.200429	0.232156	0.228533	0.126396	0.256765	0.292642	0.223615	0.0485247	0.0171561
	565.98	0.34727	0.250662	0.228492	0.409878	0.263607	0.141462	0.29157	0.334696	0.283455	0.0769732	0.0272142
	566.605	0.287573	0.233342	0.16034	0.315855	0.165978	0.139439	0.275413	0.320895	0.237354	0.0686851	0.0242838
	567.231	0.286016	0.177602	0.0509633	0.261419	0.200853	0.141644	0.2501	0.279919	0.206064	0.075741	0.0267785
	567.856	0.231833	0.230521	0.0606982	0.232585	0.244021	0.155055	0.236703	0.290917	0.210292	0.0662715	0.0234305
	568.481	0.304116	0.23622	0.228492	0.407942	0.242822	0.114823	0.270634	0.251455	0.257063	0.0765505	0.0270647
	569.106	0.358898	0.247108	0.270296	0.406864	0.12301	0.125845	0.27851	0.294585	0.263139	0.0934382	0.0330354
	569.731	0.237347	0.170606	0.282894	0.462808	0.215542	0.13209	0.235694	0.278843	0.251978	0.0928223	0.0328176
	570.356	0.312867	0.205077	0.135146	0.178368	0.191759	0.10527	0.244042	0.25555	0.20351	0.0626571	0.0221526
	570.982	0.407926	0.219858	0.265715	0.18977	0.161781	0.108392	0.250437	0.244768	0.231081	0.0827068	0.0292413
	571.607	0.189878	0.19983	0.229064	0.263355	0.195058	0.113719	0.253331	0.256415	0.212581	0.0463552	0.016389
	572.232	0.394022	0.243159	0.315532	0.331346	0.198655	0.101044	0.24835	0.297604	0.266214	0.0841802	0.0297622
	572.857	0.322096	0.184372	-0.0418006	0.327044	0.168577	0.136502	0.246667	0.309466	0.206615	0.116506	0.0411911
	573.482	0.214093	0.18945	0.022903	0.255609	0.12331	0.136502	0.201427	0.287899	0.178899	0.0781388	0.0276262
	574.108	0.192634	0.202369	0.162058	0.100911	0.187363	0.111516	0.247609	0.278194	0.185332	0.0569725	0.0201428
	574.733	0.381793	0.17196	0.241663	0.314993	0.220538	0.134297	0.233674	0.259432	0.244794	0.0725836	0.0256622
	575.358	0.298721	0.157687	0.257119	0.312195	0.23303	0.108391	0.216237	0.287252	0.233829	0.0666999	0.023582
	575.983	0.24334	0.181664	0.04524	0.361684	0.128406	0.135582	0.19355	0.301053	0.198815	0.0947525	0.0335001
	576.609	0.233392	0.185105	0.0498209	0.284656	0.14989	0.0990236	0.210044	0.230104	0.180254	0.0721564	0.0255111
	577.234	0.227638	0.17117	0.0858955	0.254534	0.155685	0.0981032	0.228625	0.237221	0.182359	0.0608798	0.0215243
	577.859	0.170818	0.150578	0.0824622	0.249371	0.173673	0.126212	0.212938	0.220829	0.17336	0.0507548	0.0179445
	578.484	0.238786	0.160169	0.0704339	0.137703	0.152588	0.0920414	0.218526	0.233337	0.162948	0.0593022	0.0209665
	579.109	0.242382	0.139238	0.0916215	0.235816	0.119412	0.0902034	0.232596	0.256415	0.17596	0.0677206	0.0239429
	579.735	0.241183	0.23368	0.184395	0.216451	0.166279	0.138888	0.195771	0.256629	0.20416	0.0375876	0.0132892
	580.36	0.133299	0.155486	0.168936	0.176861	0.150289	0.068526	0.215363	0.265255	0.166752	0.0540119	0.0190961
	580.985	0.23447	0.182003	0.12999	0.304666	0.161682	0.0913076	0.196378	0.223203	0.190462	0.0617196	0.0218212
	581.61	0.287694	0.145839	0.242802	0.283581	0.158085	0.109311	0.222566	0.244122	0.21175	0.0620225	0.0219283
	582.235	0.279663	0.179069	0.105944	0.194073	0.190759	0.105454	0.200888	0.295877	0.193966	0.0648001	0.0229103
	582.861	0.251491	0.226798	-0.0166067	0.132323	0.144595	0.0856123	0.195233	0.266982	0.160803	0.0889105	0.0314346
	583.486	0.109324	0.155317	0.148887	0.278846	0.216641	0.0966353	0.198734	0.214792	0.177397	0.0571648	0.0202108
	584.111	0.227278	0.188152	0.0647096	0.190632	0.145194	0.110964	0.212871	0.242828	0.172829	0.0573372	0.0202718
	584.736	0.318261	0.169986	0.0624222	0.285947	0.107722	0.0753232	0.169113	0.25555	0.18054	0.0910158	0.032179
	585.361	0.315143	0.204061	0.133998	0.318866	0.145593	0.090388	0.170391	0.222988	0.200179	0.0775722	0.0274259
	585.986	0.257727	0.156558	0.143166	0.224626	0.138398	0.0712825	0.170863	0.274097	0.17959	0.063665	0.022509
	586.612	0.333843	0.185049	0.0148887	0.198378	0.12421	0.121069	0.146627	0.278627	0.175337	0.0925643	0.0327264
	587.237	0.264078	0.199943	0.179244	0.169115	0.167678	0.0832231	0.16992	0.215223	0.181053	0.0480063	0.0169728
	587.862	0.281102	0.143469	0.229064	0.186111	0.12191	0.11519	0.189242	0.254474	0.19007	0.0574412	0.0203085
	588.487	0.255806	0.19622	0.178668	0.135334	0.115615	0.131174	0.177528	0.233555	0.177987	0.0466072	0.0164781
	589.112	0.334444	0.195204	0.0515389	0.0994036	0.12261	0.094246	0.179614	0.263531	0.167574	0.0890729	0.031492
	589.738	0.240943	0.198082	0.211307	0.153191	0.173772	0.0810177	0.165612	0.244767	0.183586	0.0498436	0.0176224
	590.363	0.237106	0.150465	0.32641	0.216019	0.101426	0.0951637	0.192136	0.262884	0.197701	0.0747899	0.0264422
	590.988	0.322337	0.105388	0.280603	0.202896	0.123809	0.0977356	0.190993	0.277764	0.200191	0.0812514	0.0287267
	591.613	0.245978	0.124174	0.177526	0.223981	0.130905	0.0975521	0.183183	0.255334	0.179829	0.0551171	0.0194868
	592.238	0.258806	0.17495	0.225053	0.237103	0.129306	0.106923	0.190857	0.245416	0.196052	0.0521685	0.0184443
	592.864	0.291529	0.150917	0.131135	0.166317	0.128107	0.0902042	0.180019	0.226223	0.170556	0.0592019	0.020931
	593.489	0.331927	0.113568	0.0355077	0.0955307	0.160583	0.141278	0.16036	0.319385	0.169767	0.0976989	0.0345418
	594.114	0.372803	0.105557	0.263993	0.224413	0.114715	0.0777108	0.168372	0.268276	0.19948	0.0944452	0.0333914
	594.739	0.248255	0.159886	0.10995	0.180301	0.133801	0.117944	0.191799	0.266548	0.176061	0.0541541	0.0191464
	595.365	0.363334	0.182905	0.28117	0.16481	0.147392	0.116477	0.148108	0.202283	0.20081	0.0768389	0.0271666
	595.99	0.315623	0.205584	0.206728	0.22054	0.118813	0.11721	0.173556	0.302779	0.207604	0.0690224	0.0244031
	596.615	0.20594	0.191424	0.186688	0.102415	0.116914	0.126946	0.173286	0.263747	0.17092	0.0500764	0.0177047
	597.24	0.291171	0.161014	0.300641	0.184607	0.1381	0.132642	0.149994	0.280568	0.204842	0.068347	0.0241643
	597.865	0.271511	0.165528	0.170076	0.100911	0.0834379	0.104167	0.186616	0.295879	0.172266	0.0733189	0.0259221
	598.49	0.164705	0.207503	0.314384	0.165455	0.115017	0.115925	0.154772	0.321111	0.194859	0.0761348	0.0269177
	599.116	0.222963	0.199096	0.0864676	0.158788	0.129306	0.0993902	0.180287	0.285095	0.170174	0.0619971	0.0219193
	599.741	0.264078	0.167221	0.347031	0.142651	0.10872	0.13209	0.156994	0.221693	0.19256	0.0749237	0.0264895
	600.366	0.351706	0.165867	0.329279	0.16266	0.137199	0.142197	0.171333	0.290057	0.218787	0.083427	0.0294959
	600.991	0.308791	0.17811	0.30694	0.205907	0.142896	0.123639	0.140904	0.287683	0.211859	0.0732572	0.0259003
	601.616	0.293568	0.188321	0.340726	0.0750917	0.137998	0.135215	0.155042	0.286174	0.201517	0.0878689	0.0310663
	602.242	0.303278	0.149224	0.386541	0.0114024	0.128906	0.102329	0.148041	0.26504	0.186845	0.113881	0.040263
	602.867	0.280142	0.142736	0.274877	0.214944	0.0965293	0.115925	0.147368	0.267412	0.192492	0.0708608	0.0250531
	603.492	0.346072	0.1855	0.0927674	0.11382	0.0989275	0.13356	0.182914	0.275607	0.178646	0.0847521	0.0299644
	604.117	0.332646	0.134442	0.403719	0.246573	0.126606	0.132827	0.146358	0.286821	0.226249	0.100228	0.0354359
	604.742	0.274388	0.149224	0.177526	0.16847	0.143595	0.129886	0.139558	0.285959	0.183576	0.0576549	0.0203841
	605.368	0.189757	0.177264	0.296065	0.111455	0.144694	0.127315	0.16366	0.239808	0.181252	0.0571467	0.0202044
	605.993	0.239625	0.1877	0.224478	0.251091	0.156884	0.130622	0.139222	0.281862	0.201435	0.0524191	0.018533
	606.618	0.230995	0.20598	0.414602	0.16309	0.111919	0.153401	0.158745	0.2452	0.210491	0.0874693	0.0309251
	607.243	0.359017	0.161185	0.515964	0.0824081	0.144694	0.107289	0.1541	0.323482	0.231017	0.1422	0.0502752
	607.869	0.192036	0.16282	0.203862	0.166101	0.128606	0.133378	0.134375	0.26353	0.173088	0.0428578	0.0151525
	608.494	0.228596	0.164174	0.285184	0.0935943	0.109519	0.119232	0.14178	0.286821	0.178613	0.0730224	0.0258173
	609.119	0.323296	0.212806	0.345883	0.223119	0.10992	0.153403	0.144136	0.276468	0.223629	0.0805989	0.028496
	609.744	0.274508	0.148547	0.369931	0.146307	0.111919	0.136683	0.131883	0.296309	0.202011	0.0905598	0.0320177
	610.369	0.331447	0.202087	0.21303	0.0548656	0.158584	0.149911	0.13727	0.270001	0.189649	0.079623	0.028151
	610.995	0.339959	0.150917	0.241088	0.0871395	0.124709	0.146971	0.16487	0.279921	0.191947	0.0806278	0.0285062
	611.62	0.347271	0.166882	0.378525	0.0712188	0.17687	0.16222	0.136798	0.238299	0.209761	0.0986805	0.0348888
	612.245	0.39486	0.133089	0.250253	0.108657	0.175271	0.15432	0.136327	0.240887	0.199208	0.0878461	0.0310583
	612.87	0.330848	0.146854	0.299501	0.127375	0.0906341	0.143665	0.149118	0.218027	0.188253	0.0806729	0.0285222
	613.495	0.18688	0.141213	0.396274	0.139852	0.159183	0.128601	0.132624	0.233124	0.189719	0.0846494	0.0299281
	614.12	0.272708	0.190013	0.172366	0.179872	0.0869363	0.12713	0.118554	0.251885	0.174933	0.0601531	0.0212673
	614.746	0.286376	0.144823	0.319538	0.13598	0.10992	0.12511	0.106368	0.241102	0.183652	0.0797922	0.0282108
	615.371	0.278585	0.134217	0.325268	0.126943	0.0839385	0.155241	0.113975	0.291565	0.188716	0.087872	0.0310674
	615.996	0.304236	0.16897	0.246242	0.144371	0.12321	0.121068	0.114582	0.267413	0.186261	0.070284	0.0248491
	616.621	0.200548	0.183638	0.318396	0.126943	0.123709	0.116477	0.115458	0.259432	0.180575	0.0707817	0.0250251
	617.246	0.339838	0.161523	0.186682	0.0464744	0.127306	0.109677	0.111753	0.218026	0.16266	0.0830538	0.029364
	617.872	0.296684	0.141776	0.220469	0.0968217	0.117614	0.132826	0.114246	0.247141	0.170947	0.068853	0.0243432
	618.497	0.383832	0.133878	0.354473	0.143083	0.139297	0.124744	0.130268	0.232908	0.20531	0.10021	0.0354295
	619.122	0.172375	0.127785	0.253683	0.189125	0.0970284	0.111882	0.109398	0.220184	0.160182	0.0539431	0.0190718
	619.747	0.174653	0.155092	0.339581	0.120921	0.0743455	0.129886	0.107782	0.210909	0.164146	0.0770064	0.0272259
	620.372	0.27139	0.111368	0.243948	0.168686	0.10912	0.10674	0.10004	0.225792	0.167136	0.06599	0.023331
	620.998	0.28326	0.154979	0.3121	0.150396	0.126807	0.135949	0.119967	0.263961	0.193427	0.0738211	0.0260997
	621.623	0.293687	0.157122	0.162064	0.104997	0.118613	0.114822	0.122795	0.194306	0.158551	0.0583184	0.0206187
	622.248	0.277984	0.108039	0.231925	0.137274	0.116115	0.11721	0.114716	0.209616	0.16411	0.0616886	0.0218102
	622.873	0.327012	0.12	0.209022	0.205478	0.127906	0.121253	0.0962032	0.193873	0.175093	0.0706142	0.0249659
	623.498	0.220445	0.104598	0.275443	0.0987581	0.0823392	0.146971	0.122929	0.232691	0.160522	0.0676922	0.0239328
	624.124	0.248255	0.126939	0.124842	0.0905831	0.105322	0.111147	0.0830077	0.2025	0.136574	0.0543794	0.019226
	624.749	0.263001	0.139971	0.111665	0.0923033	0.0756451	0.13209	0.0921638	0.201206	0.138506	0.0596109	0.0210757
	625.374	0.230155	0.0987306	0.155192	0.0938105	0.115816	0.109311	0.105224	0.227732	0.141996	0.0531467	0.0187902
	625.999	0.224761	0.107644	0.200429	0.109515	0.0527614	0.118497	0.0816606	0.20789	0.137895	0.0600648	0.0212361
	626.625	0.268156	0.135176	0.128272	0.18977	0.0821398	0.123458	0.104887	0.188483	0.152543	0.055911	0.0197675
	627.25	0.170577	0.11605	0.0704339	0.0585255	0.107921	0.0641168	0.112561	0.207244	0.113429	0.0492441	0.0174104
	627.875	0.204503	0.127222	0.206725	0.0948852	0.100227	0.124743	0.0834793	0.175542	0.139666	0.0462103	0.0163378
	628.5	0.235308	0.108491	0.12083	0.0382962	0.0492644	0.102697	0.105426	0.240672	0.125123	0.0706857	0.0249912
	629.125	0.237468	0.106403	0.207876	0.0839121	0.0896343	0.0834077	0.106502	0.130257	0.130682	0.0555018	0.0196229
	629.75	0.241542	0.093202	0.222762	0.123502	0.0754442	0.0766093	0.0732468	0.161524	0.133479	0.0636274	0.0224957
	630.376	0.286974	0.0863185	0.190118	0.0167824	0.0850372	0.10527	0.102128	0.178778	0.131426	0.0780662	0.0276006
	631.001	0.145645	0.123723	0.155759	0.0955307	0.036873	0.0953492	0.0784969	0.182013	0.114174	0.0438225	0.0154936
	631.626	0.202704	0.135796	0.0801687	0.0744462	0.0932317	0.112433	0.0749291	0.16627	0.117497	0.0442254	0.015636
	632.251	0.29189	0.13952	0.254261	0.0189351	0.066851	0.0799162	0.0803145	0.202283	0.141746	0.091625	0.0323943
	632.876	0.190477	0.0886313	0.287469	0.0791775	0.0437679	0.0925918	0.083345	0.203361	0.133603	0.078293	0.0276808
	633.502	0.204023	0.071707	0.193557	0.0600294	0.0541598	0.0962679	0.0709575	0.207676	0.119797	0.0646038	0.0228409
	634.127	0.10189	0.0628492	0.229062	0.0544331	0.102825	0.0887337	0.0920962	0.196246	0.116017	0.0586573	0.0207385
	634.752	0.189757	0.162651	0.116252	0.0996198	0.10972	0.0924088	0.0749968	0.190639	0.129506	0.0422402	0.0149342
	635.377	0.0927812	0.118307	0.255403	0.104784	0.0760438	0.0767921	0.0675231	0.169072	0.120088	0.0594456	0.0210172
	636.003	0.195152	0.0698444	0.0801747	0.0533584	0.0666502	0.0808358	0.0721683	0.161742	0.0974907	0.0481501	0.0170236
	636.628	0.100094	0.112778	0.269151	0.0426015	0.0426677	0.0738536	0.0899422	0.193658	0.115593	0.0732873	0.025911
	637.253	0.186641	0.0987306	0.198711	0.132968	0.0817411	0.103249	0.0850274	0.157643	0.130589	0.0429307	0.0151783
	637.878	0.20678	0.118701	0.187831	0.0441087	0.0725469	0.0902053	0.0614651	0.198619	0.122532	0.0618349	0.0218619
	638.503	0.191437	0.121184	0.0824622	0.121563	0.0509627	0.0766102	0.10334	0.164113	0.113959	0.0434404	0.0153585
	639.129	0.174175	0.0979402	0.14889	0.0920871	0.0801418	0.0791813	0.0817283	0.172954	0.115887	0.0394077	0.0139327
	639.754	0.207258	0.0770097	0.146596	0.0301212	0.0537611	0.0997567	0.0650328	0.119688	0.099903	0.0534269	0.0188893
	640.379	0.163505	0.0695067	0.115106	0.0193643	0.0877352	0.0784466	0.075535	0.168857	0.097257	0.0468877	0.0165773
	641.004	0.172136	0.0952889	0.13744	0.0503473	0.0582563	0.0488674	0.0843538	0.145784	0.0990591	0.0444183	0.0157042
	641.629	0.173934	0.0921856	-0.017177	0.0533584	0.0629539	0.0615438	0.0749968	0.147724	0.0811899	0.0551778	0.0195083
	642.255	0.146005	0.0845701	0.166069	0.115541	0.0610548	0.0690771	0.058166	0.116885	0.102171	0.0378015	0.0133648
	642.88	0.113639	0.104654	0.00343335	0.0583092	0.0622539	0.104351	0.0737173	0.133489	0.0817309	0.0384981	0.0136111
	643.505	0.0961365	0.0795484	0.202147	0.0324901	0.075744	0.0791804	0.0629465	0.159586	0.0984723	0.0516615	0.0182651
	644.13	0.161828	0.0791541	0.123696	0.07961	0.0758444	0.0591573	0.0702839	0.131764	0.0976672	0.0341587	0.0120769
	644.755	0.248616	0.0993509	0.069288	0.0912286	0.0436675	0.08653	0.0590415	0.138667	0.104549	0.0606932	0.0214583
	645.38	0.247537	0.0901555	0.107087	0.0260353	0.0451679	0.0505228	0.0702173	0.170153	0.100859	0.0695001	0.024572
	646.006	0.0951781	0.0617203	0.127129	0.0557241	0.0877367	0.0865292	0.0589739	0.116021	0.0861266	0.0247912	0.00876501
	646.631	0.230995	0.0757123	0.20215	0.072939	0.058057	0.082672	0.0557424	0.145135	0.115425	0.0642925	0.0227308
	647.256	0.154276	0.0687722	0.0355043	0.0505603	0.098328	0.0635665	0.0728428	0.115591	0.0824301	0.0359969	0.0127268
	647.881	0.143128	0.0675882	0.0120283	0.0611042	0.0455666	0.0773451	0.0592425	0.150957	0.07712	0.0443121	0.0156667
	648.506	0.0992543	0.0827084	0.0561172	0.0309829	0.0832385	0.0710971	0.0510296	0.16519	0.0799523	0.0379762	0.0134266
	649.132	0.14109	0.092299	0.154619	0.121134	0.0724464	0.069811	0.0557424	0.11559	0.102841	0.0335137	0.0118489
	649.757	0.0496272	0.0793233	0.00744135	0.104567	0.0539605	0.0486855	0.0576944	0.129178	0.0663098	0.0351187	0.0124164
	650.382	0.242983	0.0679834	0.183825	0.0731552	0.0767438	0.0690779	0.0745252	0.11322	0.112689	0.0614908	0.0217403
	651.007	0.124307	0.0516786	-0.0778812	0.165026	0.0365732	0.0830393	0.0523767	0.11667	0.0689737	0.0688762	0.0243514
	651.632	0.109444	0.0728351	0.13171	0.0785321	0.070949	0.0672399	0.0718997	0.109551	0.0890202	0.0227132	0.00803034
	652.258	0.109203	0.0604797	0.064707	0.0299082	0.0768442	0.0782636	0.0283428	0.116023	0.0704715	0.0300618	0.0106285
	652.883	0.174894	0.0752037	0.0853286	0.0337811	0.0440677	0.0563996	0.06032	0.132411	0.0828008	0.0448778	0.0158667
	653.508	0.0634131	0.086657	0.211307	0.066055	0.0435686	0.0716499	0.0646966	0.125726	0.0916341	0.0504908	0.0178512
	654.133	0.138812	0.0427641	0.123691	0.0815432	0.0242822	0.0260877	0.0487403	0.114082	0.0750004	0.0428755	0.0151588
	654.759	0.0830716	0.0530326	0.103078	0.0824081	0.0424684	0.0558485	0.0415382	0.129177	0.0738278	0.0292829	0.0103531
	655.384	0.149002	0.0814661	0.231349	0.0656257	0.075146	0.0648506	0.0455765	0.12551	0.104816	0.0575101	0.0203329
	656.009	0.141689	0.0428208	0.174663	0.0240957	0.0632537	0.0523589	0.0696104	0.0892821	0.0822217	0.0480537	0.0169895
	656.634	0.0828306	0.0563051	0.0881856	0.123715	0.0312776	0.0758755	0.0630808	0.130688	0.0814948	0.031177	0.0110227
	657.259	0.126824	0.0832161	0.139155	0.0873557	0.0146892	0.0578712	0.0547326	0.0866932	0.0813172	0.0373845	0.0132174
	657.885	0.0899043	0.0854723	0.129423	0.0989743	0.040971	0.0372952	0.0610602	0.103729	0.0808536	0.0299866	0.0106019
	658.51	0.131861	0.0752046	-0.00973827	0.0221625	0.0410699	0.0304977	0.0472599	0.120981	0.0574123	0.0457527	0.016176
	659.135	0.111841	0.040959	0.107662	0.0398066	0.0310767	0.0505228	0.0558101	0.0795776	0.064657	0.0293326	0.0103706
	659.76	0.12143	0.0508881	0.138006	0.0488401	0.0386717	0.0479506	0.0285438	0.119687	0.0742523	0.041221	0.0145738
	660.385	0.180528	0.0790407	0.0171822	0.0277555	0.0697484	0.0703621	0.038844	0.0894956	0.0716195	0.0477001	0.0168645
	661.01	0.148761	0.0669679	0.0515363	0.0402326	0.0360741	0.0597065	0.0416725	0.101359	0.0682887	0.0361573	0.0127835
	661.636	0.0970966	0.0314809	0.0950574	-0.00623854	0.0442671	0.0518069	0.0330557	0.091221	0.0547184	0.034638	0.0122464
	662.261	0.10405	0.0387029	0.132286	0.0677752	0.0232839	0.0631991	0.0441627	0.112142	0.0732001	0.0364238	0.0128778
	662.886	0.102851	0.0663468	0.0761598	-0.00301115	0.0510631	0.0795489	0.054261	0.0752636	0.0628103	0.0290963	0.0102871
	663.511	0.159431	0.0457547	0.125414	0.0309829	0.0611552	0.0556666	0.0558091	0.158291	0.086563	0.0490718	0.0173495
	664.136	0.106326	0.0854723	0.0881916	0.0204391	0.0674506	0.0409675	0.040999	0.102219	0.0690082	0.0297214	0.0105081
	664.762	0.125986	0.0713109	0.070439	-0.0075295	0.064853	0.045746	0.0474619	0.100064	0.0647914	0.037008	0.0130843
	665.387	0.0661696	0.0475598	0.0847557	0.147814	0.0388725	0.0525427	0.0517708	0.0886341	0.0722649	0.0329834	0.0116614
	666.012	0.122629	0.0412416	0.0148861	0.0460419	0.042969	0.0365603	0.0502894	0.113866	0.0585604	0.035922	0.0127003
	666.637	0.114119	0.0374614	-0.024621	0.0742299	0.0462666	0.0687106	0.0450383	0.110416	0.0589527	0.0415654	0.0146956
	667.263	0.128863	0.0350919	0.200429	0.0324901	0.0374726	0.0518078	0.0412009	0.0838896	0.0764056	0.0561083	0.0198373
	667.888	0.127425	0.0455288	-0.0876135	0.0288303	0.0426677	0.0365595	0.0394509	0.122061	0.0443636	0.0619319	0.0218962
	668.513	0.148283	0.0500986	0.104226	0.0275425	0.0305776	0.0446437	0.0401911	0.0782837	0.0654808	0.0395114	0.0139694
	669.138	0.130661	0.0685471	-0.0355043	0.129957	0.0527614	0.0620968	0.0293516	0.0942423	0.0665142	0.0511253	0.0180755
	669.763	0.0624529	0.0207613	0.0057294	0.0742299	0.0554594	0.0516251	0.0243712	0.0696564	0.0455357	0.0236463	0.00836022
	670.389	0.0781556	0.0427641	0.131708	-0.00882368	0.0295778	0.0389487	0.0359498	0.0713819	0.0524577	0.0389341	0.0137653
	671.014	0.146125	0.0419178	0.0263424	0.0664842	0.0387721	0.0286596	0.0233603	0.082597	0.0567823	0.038927	0.0137628
	671.639	0.173454	0.0371787	0.0618441	0.0232372	0.05526	0.0319673	0.0276016	0.118178	0.0660901	0.0496153	0.0175417
	672.264	0.111242	0.0532018	0.0486759	0.0737975	0.0301789	0.0391306	0.0276692	0.076126	0.0575028	0.0263886	0.00932977
	672.889	0.0529842	0.0446258	0.108234	0.066055	0.0659517	0.0376607	0.0383058	0.0800069	0.061728	0.0224452	0.00793556
	673.514	0.108723	0.0713118	-0.00973483	0.0705733	0.0477655	0.0608107	0.03494	0.106317	0.0613383	0.036031	0.0127389
	674.14	0.133896	0.0401686	-0.00744479	0.00731649	0.0318771	0.045929	0.0298232	0.0825947	0.0455201	0.0416998	0.0147431
	674.765	0.0748004	0.00947811	0.196993	-0.0075295	0.0472649	0.0411533	0.0228221	0.091868	0.0596062	0.0602211	0.0212914
	675.39	0.0786357	0.0621155	0.0635672	0.0720773	0.0503631	0.0602577	0.0419421	0.0746167	0.0629469	0.0115842	0.00409562
	676.015	0.0415969	0.0350352	0.0589862	0.0415236	0.0315759	0.0552984	0.0406627	0.0720288	0.0470885	0.0128419	0.00454031
	676.64	0.164106	0.0450769	-0.0022909	0.196438	0.0470655	0.0485009	0.0451049	0.0692252	0.0766533	0.0631903	0.0223411
	677.266	-0.0441124	0.0232434	0.0160346	-0.0189351	0.0482646	0.0488682	0.040797	0.0994168	0.0266971	0.0413303	0.0146125
	677.891	0.0955377	0.0205362	-0.0813197	0.035285	0.0489646	0.0394979	0.0422108	0.0983376	0.0373813	0.0520071	0.0183873
	678.516	0.102732	0.0299576	0.0618441	-0.0144167	0.0359736	0.0295781	0.0300928	0.104376	0.0475171	0.037732	0.0133403
	679.141	0.102252	0.04299	0.0767328	0.0555111	0.0194857	0.018004	0.0183122	0.0845379	0.0522282	0.030896	0.0109234
	679.766	0.0668888	0.0573764	0.0887645	0.0329194	0.0467657	0.0236993	0.0197926	0.120766	0.0571215	0.0323087	0.0114228
	680.392	0.0557407	0.0160789	0.125411	0.0733682	0.0320765	0.0082672	0.0267937	0.0933796	0.0538895	0.038371	0.0135662
	681.017	0.147083	0.0473906	-0.0120257	0.0518545	0.0358747	0.0477659	0.0346704	0.0601667	0.0515976	0.0415408	0.0146869
	681.642	0.0572996	0.0341889	-0.00916533	0.013555	0.0249822	0.0396825	0.0144738	0.0938108	0.0336035	0.0293579	0.0103796
	682.267	0.0468689	0.0257263	0.0635646	0.128666	0.0348735	0.0174521	0.0362195	0.076126	0.0536871	0.0335844	0.0118739
	682.892	0.0562207	0.0588997	-0.0274848	0.0473329	0.0489646	0.0398672	0.0226201	0.115808	0.0452785	0.0373072	0.0131901
	683.518	0.129344	0.0183359	-0.0939124	-0.028401	0.0297787	0.0505228	0.023024	0.0782817	0.0258717	0.0626845	0.0221623
	684.143	0.044713	0.0115658	0.0755929	0.0408781	0.0291791	0.046479	0.0339302	0.0711651	0.0441879	0.0197649	0.00698794
	684.768	0.0813921	0.030071	0.146602	0.0195806	0.0331752	0.0332526	0.0188504	0.0897136	0.0565797	0.0424333	0.0150024
	685.393	0.0483092	0.072665	-0.00973483	0.0122641	0.0320765	0.0429894	0.0304968	0.0772032	0.0382837	0.0271602	0.00960259
	686.019	0.139891	0.0143297	0.0355077	0.0544364	0.0220848	0.0260885	0.0281398	0.08691	0.0509235	0.0399482	0.0141238
	686.644	0.0402771	0.0225664	0.025772	0.0671297	0.0566585	0.0198413	0.0455088	0.054346	0.0415125	0.0163715	0.00578819
	687.269	0.0157027	0.0371796	0.066425	0.0344233	0.0516612	0.0238839	0.0233603	0.0847514	0.0421734	0.0222631	0.00787121
	687.894	0.0511861	0.0381376	-0.02004	0.0768119	0.0126912	0.036926	0.023428	0.0828114	0.037744	0.0314453	0.0111176
	688.519	0.0276905	0.0383076	0.0406616	0.0228047	0.0373721	0.0354561	0.0266594	0.0601687	0.0361401	0.0108605	0.00383978
	689.144	0.0250527	0.0375739	0.0956364	0.14674	0.0342754	0.0472159	0.0225525	0.0718121	0.0601073	0.0401324	0.014189
	689.77	0.137374	0.0398876	-0.0292054	0.00214944	0.0320765	0.0295792	0.0228221	0.0539125	0.0360745	0.0450561	0.0159297
	690.395	0.146485	0.0361632	-0.00687443	0.0686369	0.0283787	0.0444602	0.0228221	0.0922992	0.0540463	0.0446904	0.0158004
	691.02	0.099373	0.0111706	-0.063562	0.0834796	0.0328754	0.0567689	0.035142	0.0565004	0.0389685	0.0468924	0.016579
	691.645	0.0648516	0.0256696	0.0858981	0.0544364	0.0244816	0.0415198	0.0189171	0.08691	0.0503355	0.0254254	0.00898922
	692.27	0.0420752	0.0339063	0.0292028	0.0776736	0.0649534	0.0415198	0.0163592	0.0683625	0.0467566	0.0200013	0.00707152
	692.896	0.0786357	0.0247108	0.0744453	0.0537909	0.0332756	0.0393141	0.0236299	0.0504632	0.0472832	0.0196911	0.00696187
	693.521	0.0508247	0.00592382	-0.0286324	0.0630406	0.0310767	0.0224143	0.0245045	0.0383876	0.0259425	0.0263873	0.00932932
	694.146	0.0342841	0.0415234	-0.112813	0.0142005	0.0352752	0.0455624	0.0276692	0.054991	0.0175867	0.050576	0.0178813
	694.771	0.0643715	-0.00231283	0.0515389	0.0481946	0.0347745	0.0385811	0.0357479	0.0528344	0.0404662	0.0186916	0.0066085
	695.396	0.0290085	0.0401127	0.0412337	0.0187189	0.0253824	0.0319673	0.0193887	0.068795	0.0343259	0.0152063	0.00537623
	696.022	0.104769	0.0327215	-0.0171796	0.0479816	0.0124904	0.0235147	0.0188504	0.0502465	0.0341743	0.0333365	0.0117862
	696.647	0.0543022	0.0359373	-0.0423761	0.0303375	0.0187857	0.0266377	0.0213407	0.0754791	0.0275555	0.0318136	0.0112478
	697.272	0.0853497	0.045698	-0.0595592	0.0361468	0.0426677	0.0260877	0.0204662	0.0599519	0.0321011	0.0395239	0.0139738
	697.897	0.136174	0.0137661	0.0532594	0.103276	0.0130899	0.0433559	0.000337282	0.0709494	0.0542761	0.0443754	0.0156891
	698.523	0.0393187	0.039379	-0.00801429	0.0843414	0.0482646	-0.00183725	0.0214083	0.0776348	0.0375619	0.031236	0.0110436
	699.148	0.0830716	0.0156837	-0.00114244	0.0884305	0.0200853	0.0428067	0.0311027	0.078066	0.044763	0.0320855	0.0113439
	699.773	0.0752805	0.0185043	-0.0738698	0.0509927	0.00759494	0.0393152	0.0321125	0.0485233	0.0248067	0.0420308	0.0148601
	700.398	0.040038	0.0295632	0.157477	0.0903669	0.0345737	0.024617	0.0222838	0.07246	0.0589225	0.0436115	0.015419
	Hv1-L198Anap
	Wavelenght (nm)	Cell_1	Cell_2	Cell_3	Cell_4	Cell_5	Cell_6	Cell_7	Average	S.D.	S.E.M.
	405.929	0.0085163	0.0153453	-0.000360899	0.00960676	0.019523	-0.0375463	0.0125481	0.00394746	0.0178872	0.00676074
	406.554	0.00684406	0.0190625	0.00144392	0.000109707	0.00374683	0.00114935	0.0267918	0.00844974	0.00960425	0.00363006
	407.179	0.0454742	0.0284139	-0.00242086	-0.00971483	0.0161045	-0.0063214	0.0256625	0.0138854	0.0192121	0.0072615
	407.805	0.0177946	0.0229002	0.00450216	-0.00403952	0.0154478	0.0204957	0.0135655	0.0129523	0.0088321	0.00333822
	408.43	0.0293542	0.00107901	-0.0025693	-0.0113522	0.0122265	0.00823794	0.0065572	0.00621904	0.0118799	0.00449017
	409.055	-0.000456271	0.0128294	0.00626461	-0.00884208	0.0165649	-0.0158983	0.0265663	0.0052898	0.0137284	0.00518884
	409.68	-0.012625	0.0165448	0.00303659	-0.0150643	0.010781	-0.0185821	0.0391143	0.00331506	0.0192124	0.00726159
	410.305	0.00197565	0.0357278	-0.00150762	-0.00523975	0.0118982	-0.00229869	-0.000225526	0.00576144	0.0132269	0.00499929
	410.93	0.0472993	0.0417217	-0.00307927	-0.00731437	0.00926848	-0.000956831	-0.000339137	0.0123714	0.0208959	0.00789792
	411.556	0.00471556	0.018104	0.00866413	0.010807	0.0160394	0.0105366	0.0327843	0.0145216	0.00852569	0.00322241
	412.181	0.0147512	0.0199023	0.00165638	0	0.012687	0.0429108	0.0274701	0.017054	0.0138228	0.00522452
	412.806	0.0127756	0.00947191	0.000891896	-0.0160467	0.0178132	0.0390778	0.0124344	0.0109169	0.0154734	0.00584839
	413.431	0.00151938	0.0334493	0.00295186	0.0153918	0.00894014	0.026435	0.0213656	0.0157219	0.0111597	0.00421796
	414.057	0.00593152	0.0257758	-0.000764482	-0.010152	0.019588	0.0191539	0.00892946	0.00978031	0.0117348	0.00443533
	414.682	0.00562582	0.028173	0.00407724	0.000872746	0.0174859	0.0130278	0.0105132	0.0113965	0.00861555	0.00325637
	415.307	0.038783	0.0255366	-0.0016774	0.00120023	0.0112405	0.0373537	-0.00350328	0.0155619	0.0168997	0.0063875
	415.932	0.00912542	0.00743258	0.00409858	-0.00895179	0.0186681	0.0132175	0.0175215	0.00873027	0.00871885	0.00329542
	416.557	0.0150569	0.0199023	0.00165638	-0.000327484	0.0281998	0.000385031	0.0274701	0.0131919	0.0116954	0.00442043
	417.183	0.0146007	0.00455702	0.00484172	-0.0042573	0.0157761	0.0208807	0.0293913	0.0122558	0.0105073	0.0039714
	417.808	0.0404575	0.037287	0.00333378	-0.00720466	0.0115028	-0.0137922	0.0226085	0.0134561	0.0194803	0.00736285
	418.433	0.00973226	0.0377654	6.37068e-05	0.000327484	0.00972796	0.00900225	0.0288266	0.0136351	0.0132357	0.00500263
	419.058	0.0232698	0.0190625	0.00252725	0.00840653	0.0219545	0.0136025	0.00689634	0.0136742	0.00744139	0.00281258
	419.683	0.00638779	0.00383588	0.00350388	-0.0048042	0.0194569	0.0155162	0.0180878	0.0088549	0.00835382	0.00315745
	420.308	-0.0085163	0.0280543	0.00322803	0.0103698	0.0109122	0.0176223	0.0279228	0.012799	0.0121897	0.00460728
	420.934	0.0031939	0.0315305	0.00273939	0.00447671	0.0125548	0.0273918	0.0176351	0.0142175	0.0109277	0.00413027
	421.559	0.0266166	0.020021	0.0102568	0.0240161	0.0232037	0.0189642	0.0204618	0.0205057	0.00484912	0.0018328
	422.184	0.0647905	0.0243371	0.00471431	0.010152	0.0291859	0.0103441	0.0405828	0.0263009	0.019563	0.00739413
	422.809	-0.0187071	0.0286531	0.0151412	0.017247	0.03129	0.0473128	0.0153748	0.0194731	0.0188877	0.00713887
	423.435	-0.00425701	0.0272144	0.0116797	0.00818711	0.0305002	0.0273918	0.017296	0.0168589	0.0116641	0.00440862
	424.06	0.0413701	0.0219399	0.0157569	0.00447508	0.0123576	0.0436751	0.0430703	0.0260922	0.0151697	0.00573359
	424.685	0.0304196	0.0362062	0.0223824	0.0332937	0.0395715	0.086586	0.0613837	0.0442633	0.0205704	0.00777489
	425.31	0.00927827	0.0257758	0.0178379	0.0276184	0.0311579	0.087925	0.0639849	0.037654	0.0259184	0.00979624
	425.935	0.0171877	0.0543102	0.038564	0.0370057	0.0402291	0.132749	0.0867053	0.0581074	0.0363023	0.013721
	426.56	0.0328515	0.0547904	0.0373749	0.0354764	0.0500892	0.121449	0.0768704	0.0584145	0.0293224	0.0110828
	427.186	0.0121687	0.068456	0.0330849	0.0517425	0.056728	0.185809	0.10536	0.0733355	0.0531886	0.0201034
	427.811	0.0241824	0.0993895	0.0469096	0.0589472	0.0593577	0.158228	0.0786797	0.0750991	0.0403715	0.015259
	428.436	0.0323952	0.0950734	0.0638556	0.0556724	0.0729646	0.205925	0.10615	0.0902909	0.0523656	0.0197923
	429.061	0.101596	0.0975911	0.0748769	0.102722	0.09091	0.216844	0.186978	0.124503	0.0503483	0.0190299
	429.687	0.114068	0.146147	0.0759596	0.0992278	0.100836	0.295572	0.139385	0.138742	0.0678227	0.0256346
	430.312	0.112546	0.155737	0.0816085	0.116147	0.117729	0.278909	0.174542	0.148174	0.0603525	0.0228111
	430.937	0.100227	0.203455	0.0885102	0.109052	0.132651	0.230829	0.187995	0.150388	0.0521938	0.0197274
	431.562	0.160151	0.182473	0.0977476	0.152827	0.163414	0.3199	0.188674	0.180741	0.0630448	0.0238287
	432.187	0.158326	0.207771	0.0886372	0.132084	0.14376	0.311665	0.224395	0.180948	0.0681361	0.025753
	432.812	0.147832	0.164608	0.103141	0.185138	0.174064	0.324883	0.277753	0.196774	0.0715318	0.0270365
	433.438	0.194675	0.191465	0.133721	0.15097	0.169725	0.321817	0.285892	0.206895	0.0651358	0.024619
	434.063	0.238935	0.205131	0.162856	0.159267	0.212517	0.35266	0.336876	0.23832	0.0722087	0.0272923
	434.688	0.183421	0.200457	0.170819	0.186556	0.234933	0.361087	0.284988	0.231752	0.0639671	0.0241773
	435.313	0.192394	0.233185	0.154574	0.173894	0.243872	0.393269	0.311666	0.243265	0.0779636	0.0294675
	435.938	0.221595	0.256206	0.187256	0.168982	0.268326	0.330629	0.367398	0.257199	0.0671913	0.0253959
	436.564	0.248971	0.258004	0.185748	0.212428	0.261423	0.460695	0.333597	0.280124	0.085159	0.0321871
	437.189	0.215513	0.302842	0.149456	0.227166	0.249329	0.432347	0.403459	0.282873	0.0955046	0.0360974
	437.814	0.25034	0.273709	0.171223	0.204133	0.269245	0.443265	0.425391	0.291044	0.0967793	0.0365791
	438.439	0.169886	0.279343	0.223632	0.193543	0.312236	0.441541	0.367851	0.284005	0.0906469	0.0342613
	439.065	0.231936	0.259921	0.180949	0.333379	0.292515	0.504563	0.401087	0.314907	0.101483	0.0383569
	439.69	0.259771	0.295408	0.225756	0.278144	0.328603	0.467209	0.38232	0.319602	0.0760578	0.0287471
	440.315	0.232242	0.362188	0.218854	0.325847	0.346747	0.535213	0.419851	0.348706	0.100698	0.0380601
	440.94	0.328971	0.26136	0.229706	0.267882	0.318875	0.471807	0.457607	0.333744	0.0886795	0.0335177
	441.565	0.276804	0.395038	0.232042	0.320498	0.355424	0.562987	0.44766	0.370065	0.103014	0.0389356
	442.19	0.276651	0.326581	0.222528	0.287094	0.353254	0.525061	0.449809	0.348711	0.0976452	0.0369064
	442.816	0.326843	0.313391	0.285831	0.341786	0.389473	0.604749	0.484514	0.39237	0.10559	0.0399091
	443.441	0.249124	0.449108	0.253086	0.303143	0.36995	0.608768	0.466085	0.385609	0.121623	0.0459692
	444.066	0.386005	0.427288	0.311208	0.340474	0.401437	0.539618	0.485757	0.413112	0.0736922	0.027853
	444.691	0.43072	0.431363	0.316368	0.304669	0.382046	0.575822	0.462018	0.414715	0.0858371	0.0324434
	445.317	0.442583	0.399473	0.27498	0.388397	0.423918	0.572374	0.509609	0.43019	0.0874209	0.033042
	445.942	0.460683	0.385566	0.311909	0.371475	0.429637	0.605898	0.563759	0.44699	0.0979048	0.0370045
	446.567	0.440302	0.416138	0.324501	0.377372	0.443704	0.671408	0.510626	0.454864	0.103397	0.0390803
	447.192	0.384484	0.529435	0.316304	0.309036	0.441732	0.661834	0.515488	0.451187	0.118061	0.0446227
	447.817	0.463115	0.386404	0.310507	0.395709	0.449948	0.635396	0.56647	0.458221	0.102877	0.0388839
	448.442	0.372623	0.440715	0.396257	0.403569	0.477886	0.693056	0.499323	0.469061	0.100613	0.0380281
	449.068	0.347678	0.47884	0.343847	0.487624	0.46487	0.642867	0.562516	0.475463	0.0996603	0.0376681
	449.693	0.40304	0.519004	0.330129	0.440686	0.456916	0.766039	0.540696	0.493787	0.128816	0.048688
	450.318	0.41916	0.532191	0.365444	0.495047	0.528237	0.729642	0.577663	0.521055	0.10834	0.0409486
	450.943	0.316045	0.525478	0.416133	0.443195	0.512922	0.673517	0.639384	0.503811	0.116097	0.0438807
	451.568	0.470719	0.518164	0.395534	0.47518	0.532905	0.723321	0.681439	0.542466	0.109524	0.041396
	452.194	0.444255	0.574273	0.429193	0.484896	0.536059	0.822932	0.600384	0.555999	0.123968	0.0468555
	452.819	0.540528	0.598013	0.452446	0.527686	0.579707	0.771019	0.664933	0.590619	0.0954701	0.0360843
	453.444	0.514217	0.50258	0.430382	0.458698	0.562551	0.775426	0.669455	0.559044	0.113921	0.0430579
	454.069	0.509808	0.533869	0.406683	0.541767	0.586675	0.834618	0.700317	0.587677	0.129556	0.0489677
	454.695	0.552848	0.602568	0.488037	0.6315	0.600479	0.82159	0.752432	0.635636	0.106373	0.0402051
	455.32	0.544637	0.639375	0.498719	0.616326	0.576223	0.829443	0.706872	0.630228	0.102382	0.0386969
	455.945	0.512239	0.610959	0.476867	0.612396	0.607776	0.843045	0.608185	0.61021	0.107972	0.0408097
	456.57	0.56091	0.643689	0.506873	0.666976	0.64577	0.75991	0.669004	0.636162	0.0754692	0.0285247
	457.195	0.547829	0.60029	0.542591	0.701689	0.640314	0.842471	0.717274	0.656065	0.0989412	0.0373963
	457.82	0.548894	0.66575	0.478969	0.574735	0.666147	0.794965	0.765882	0.642192	0.10668	0.0403213
	458.446	0.563495	0.65328	0.524414	0.577683	0.704207	0.804927	0.717613	0.649374	0.0925861	0.0349943
	459.071	0.567145	0.700037	0.559389	0.658353	0.651817	0.834618	0.753109	0.674924	0.0910407	0.0344101
	459.696	0.654293	0.659394	0.56612	0.62484	0.713214	0.957213	0.795501	0.710082	0.120743	0.0456367
	460.321	0.634826	0.637936	0.595192	0.654422	0.709335	0.911431	0.781596	0.703534	0.101786	0.0384715
	460.947	0.66783	0.619712	0.558476	0.667741	0.694216	0.859136	0.708117	0.682175	0.0859822	0.0324982
	461.572	0.690794	0.739122	0.632121	0.705074	0.693098	0.909322	0.752995	0.73179	0.0809291	0.0305883
	462.197	0.653533	0.748952	0.615663	0.701144	0.755874	0.954147	0.824892	0.750601	0.10492	0.0396559
	462.822	0.656268	0.74248	0.60341	0.78509	0.742859	0.934993	0.829189	0.756327	0.101296	0.0382863
	463.447	0.652771	0.811896	0.615684	0.755942	0.773622	0.974453	0.732196	0.759509	0.108221	0.0409035
	464.072	0.635738	0.753987	0.650044	0.779413	0.798009	1.00913	0.837103	0.780489	0.116164	0.043906
	464.698	0.761213	0.770293	0.624242	0.746337	0.773359	0.984415	0.867962	0.789689	0.103338	0.0390579
	465.323	0.743872	0.731209	0.620696	0.817401	0.76087	0.922158	0.956818	0.793289	0.107614	0.0406743
	465.948	0.685166	0.805183	0.692281	0.691428	0.798733	0.981159	0.914087	0.795434	0.108427	0.0409816
	466.573	0.733837	0.758424	0.663613	0.751904	0.81589	1.00855	0.917137	0.807051	0.109636	0.0414384
	467.199	0.798321	0.743918	0.660258	0.957784	0.784666	0.953765	0.962809	0.83736	0.112241	0.0424232
	467.824	0.658096	0.767655	0.68419	0.883881	0.849217	0.923885	0.838006	0.800704	0.0932291	0.0352373
	468.449	0.861287	0.841869	0.701731	0.857135	0.828576	0.997443	0.974678	0.866103	0.0911483	0.0344508
	469.074	0.813075	0.871001	0.734179	0.865651	0.889709	0.971197	1.0078	0.878945	0.0851604	0.0321876
	469.699	0.81931	0.895579	0.688352	0.921869	0.82667	0.950891	1.01583	0.874071	0.0989084	0.0373838
	470.325	0.843342	0.793672	0.729592	0.846875	0.862626	1.01238	0.879946	0.852633	0.0802678	0.0303384
	470.95	0.79513	1.01523	0.701986	0.852332	0.896939	1.06506	0.942121	0.895543	0.11628	0.0439497
	471.575	0.834214	0.817651	0.727171	0.908222	0.879059	0.9348	0.961113	0.866033	0.0740219	0.0279776
	472.2	0.8076	0.913323	0.783254	0.879296	0.874721	1.12962	0.852928	0.891534	0.105459	0.0398597
	472.825	0.820832	0.835035	0.744988	0.875693	0.903447	1.05069	0.927989	0.879811	0.0892499	0.0337333
	473.45	0.819766	0.931425	0.768793	1.01214	0.944005	1.0733	0.937487	0.926702	0.0968054	0.036589
	474.076	0.866762	0.998203	0.869726	0.932239	0.922904	1.11889	0.976035	0.954965	0.0808652	0.0305642
	474.701	0.83376	0.955284	0.82717	0.89949	0.916068	1.03441	1.03663	0.928973	0.0791603	0.0299198
	475.326	1.00638	0.92723	0.870533	0.981581	0.940914	1.07694	1.07258	0.982308	0.0706336	0.026697
	475.951	0.902353	0.978663	0.858938	1.03965	0.913044	1.02962	1.09903	0.974472	0.0803071	0.0303532
	476.577	0.942047	0.979261	0.916487	0.94261	0.930398	1.13555	1.02566	0.981717	0.0713088	0.0269522
	477.202	0.978398	0.994968	0.883274	1.01717	0.92882	1.0233	1.08987	0.987971	0.0622037	0.0235108
	477.827	0.893835	0.968471	0.868643	1.13157	0.979304	1.00491	0.987677	0.976344	0.0788463	0.0298011
	478.452	0.99543	0.909487	0.861168	0.854625	0.966156	1.14992	1.0459	0.968955	0.0982732	0.0371438
	479.077	0.967445	0.938739	0.89472	0.90211	0.988113	1.12828	0.915443	0.962121	0.074815	0.0282774
	479.702	0.897332	0.944373	0.934388	1.14008	0.969114	1.04016	1.03188	0.993904	0.0764251	0.028886
	480.328	1.02159	1.00276	0.890197	0.939225	1.01723	1.03039	1.02849	0.989983	0.0500767	0.0189272
	480.953	1.04851	0.956723	0.898883	0.819476	0.999813	1.03326	1.09507	0.97882	0.0878674	0.0332108
	481.578	1.02889	1.0295	0.99474	1.05777	0.974899	1.01583	1.10615	1.02968	0.0397332	0.0150178
	482.203	0.999386	0.988494	0.960551	0.908332	0.962409	1.03499	1.03561	0.984253	0.0418525	0.0158187
	482.829	1.03163	1.03861	0.971614	0.964114	0.963594	0.994184	0.918833	0.983225	0.038844	0.0146816
	483.454	0.982048	0.943895	0.923112	1.04271	0.988375	1.06774	1.0477	0.99937	0.0509945	0.0192741
	484.079	0.89216	0.912722	0.892851	0.928528	1.05345	1.01583	1.04714	0.96324	0.0673018	0.0254377
	484.704	0.904635	0.886467	0.946365	0.937807	0.966354	1.06602	1.10739	0.973577	0.0764067	0.028879
	485.329	1.03923	0.987174	0.969151	0.89185	0.990018	1.09705	0.992541	0.995288	0.0582734	0.0220253
	485.954	1.06448	1.06726	0.9693	1.01204	0.958269	0.973114	1.00543	1.00713	0.041244	0.0155888
	486.58	0.982657	1.20118	0.955242	1.11978	1.01973	1.02828	1.09971	1.05808	0.0798565	0.0301829
	487.205	0.953456	1.01487	0.940355	1.03092	1.00461	0.993802	0.991974	0.989998	0.0300592	0.0113613
	487.83	0.936115	1.12421	0.962972	1.039	1.01598	1.02617	1.07992	1.02634	0.05961	0.0225305
	488.455	1.05383	1.16293	1.05288	0.998718	1.0102	0.929057	1.09643	1.04344	0.0691503	0.0261364
	489.08	0.951172	1.04952	0.919821	0.927436	1.0169	0.921583	0.902668	0.955586	0.0515898	0.0194991
	489.706	1.03133	1.02506	1.00432	1.07917	1.00152	0.999356	0.936017	1.01097	0.0399117	0.0150852
	490.331	0.97642	1.02098	1.02356	1.00778	1.0451	1.07215	1.07698	1.03185	0.0331132	0.0125156
	490.956	1.00806	0.904211	1.03143	1.02601	1.00744	1.06563	1.01108	1.00769	0.0462546	0.0174826
	491.581	1.03208	0.913922	0.995993	1.02284	0.991005	0.987481	0.934321	0.982521	0.0403372	0.015246
	492.207	1.01718	0.989453	1.04915	0.983	0.971482	0.947828	0.914765	0.981836	0.0407106	0.0153872
	492.832	1.00973	1.02578	1.03645	0.967825	1.01605	0.909707	1.1395	1.015	0.0648262	0.024502
	493.457	1.03817	0.989933	1.00506	0.967499	1.02867	0.95415	0.893513	0.982428	0.0458919	0.0173455
	494.082	0.98448	1.06451	1.01215	0.972082	0.981998	1.0053	0.964279	0.997828	0.0314505	0.0118872
	494.707	1.08288	0.97087	0.961889	1.06476	1.02098	0.980967	0.934321	1.00238	0.0513265	0.0193996
	495.332	1.11497	1.01811	1.02436	1.02819	0.984628	0.977519	0.965974	1.01625	0.0462692	0.0174881
	495.958	0.985089	0.855055	0.994676	1.07513	0.963594	0.987096	0.939522	0.971452	0.0613527	0.0231892
	496.583	0.901135	0.95792	0.948807	0.984855	0.999089	0.981734	1.01752	0.970152	0.0354567	0.0134014
	497.208	1.02813	0.89414	1.00536	1.04217	1.00277	0.90128	0.933076	0.972417	0.0569596	0.0215287
	497.833	1.02494	1.04496	0.971126	1.04424	0.948278	0.968899	0.976486	0.99699	0.0369678	0.0139725
	498.459	0.927143	1.01259	1.00419	1.07262	0.977923	0.910092	0.913634	0.974028	0.056145	0.0212208
	499.084	0.932465	1.02506	0.990281	0.99195	0.934539	1.00166	0.944721	0.974382	0.0340122	0.0128554
	499.709	1.03756	0.923872	0.967261	0.991404	0.964974	0.898789	0.971626	0.965069	0.041553	0.0157056
	500.334	0.81855	0.94845	0.920139	0.919029	0.953338	0.944955	1.01232	0.930969	0.0541398	0.0204629
	500.959	0.933378	0.882152	0.947448	0.9556	0.920669	0.899171	0.946642	0.926437	0.0253157	0.00956845
	501.584	0.948891	0.885868	1.00631	0.934094	0.916791	0.857794	0.991522	0.934467	0.0495384	0.0187237
	502.21	0.887903	0.892221	0.920139	0.861066	0.916462	0.865075	0.987905	0.904396	0.0400196	0.015126
	502.835	1.05186	0.932265	0.910159	0.822641	0.938811	0.861817	0.911826	0.918482	0.0664425	0.0251129
	503.46	0.934749	0.925431	1.03772	0.972411	0.904695	0.93959	0.939069	0.950524	0.0401992	0.0151939
	504.085	0.983567	0.965355	0.974247	0.919904	0.896939	0.77255	0.917251	0.918545	0.0668758	0.0252767
	504.711	0.872084	0.941976	0.910265	0.978088	0.931055	0.89649	0.795048	0.903572	0.0543096	0.0205271
	505.336	0.931705	0.902893	0.951589	0.861502	0.92297	0.890743	1.01899	0.925771	0.046722	0.0176593
	505.961	0.782808	0.997605	0.908311	1.06312	0.887539	0.760675	0.90979	0.901407	0.0997053	0.0376851
	506.586	0.902353	0.995927	0.926829	0.795679	0.885172	0.948785	0.926182	0.911561	0.05752	0.0217405
	507.211	0.854445	0.947972	0.952205	0.769698	0.875576	0.84362	0.875311	0.874118	0.0582803	0.0220279
	507.837	0.771554	0.837433	0.895272	0.936606	0.872551	0.715468	0.886503	0.845055	0.0713448	0.0269658
	508.462	0.774748	0.990293	0.894826	0.868052	0.865782	0.78213	0.82478	0.85723	0.0684581	0.0258747
	509.087	0.995887	0.939818	0.904255	0.842727	0.859799	0.797264	0.848406	0.884022	0.0622481	0.0235276
	509.712	0.845317	0.896059	0.829973	0.831373	0.88537	0.757801	0.931835	0.853961	0.0524135	0.0198104
	510.337	0.950109	0.819568	0.887288	0.88519	0.878862	0.64574	0.693421	0.822883	0.103855	0.0392536
	510.962	0.843342	0.914641	0.912133	0.774281	0.824237	0.744394	0.849876	0.837558	0.0592204	0.0223832
	511.588	0.968056	1.03165	0.934707	0.847639	0.875838	0.772361	0.818562	0.892688	0.0837039	0.0316371
	512.213	0.785851	0.842587	0.862591	0.833011	0.813194	0.691906	0.797761	0.803843	0.0517978	0.0195777
	512.838	0.871021	0.857333	0.776565	0.880715	0.797812	0.69957	0.774135	0.808165	0.060579	0.0228967
	513.463	0.781442	0.879992	0.871	0.783998	0.799587	0.656466	0.813589	0.79801	0.0684516	0.0258723
	514.088	0.726078	0.859252	0.838233	0.758999	0.771059	0.68884	0.706874	0.764191	0.0597716	0.0225916
	514.714	0.678931	0.753509	0.78404	0.776356	0.811945	0.709339	0.783633	0.756822	0.0434452	0.0164207
	515.339	0.629047	0.858054	0.859044	0.830391	0.758569	0.661449	0.727675	0.760604	0.0864248	0.0326655
	515.964	0.773076	0.848822	0.843479	0.602354	0.764354	0.79937	0.749831	0.768755	0.076548	0.0289324
	516.589	0.846536	0.881071	0.831289	0.877003	0.748513	0.723321	0.761361	0.809871	0.0597474	0.0225824
	517.215	0.764254	0.758784	0.781683	0.798517	0.74069	0.644019	0.65996	0.735415	0.055517	0.0209834
	517.84	0.731553	0.81705	0.790623	0.712171	0.702432	0.702825	0.709926	0.738083	0.0431232	0.016299
	518.465	0.648512	0.687089	0.845857	0.73553	0.715053	0.539236	0.778544	0.707117	0.0904281	0.0341786
	519.09	0.811706	0.718382	0.79177	0.699507	0.714265	0.560688	0.696134	0.713207	0.075255	0.0284437
	519.715	0.66068	0.824603	0.772063	0.741752	0.696122	0.700719	0.576079	0.710288	0.074296	0.0280813
	520.341	0.627829	0.800985	0.72097	0.703764	0.68968	0.543833	0.622655	0.672817	0.0766858	0.0289845
	520.966	0.696879	0.84031	0.784422	0.557706	0.662861	0.676198	0.635203	0.693368	0.0869385	0.0328596
	521.591	0.683645	0.731688	0.769494	0.664902	0.665819	0.564521	0.628194	0.672609	0.061829	0.0233692
	522.216	0.714064	0.796189	0.746304	0.702344	0.70848	0.602257	0.617568	0.698172	0.0632422	0.0239033
	522.841	0.689578	0.758544	0.742588	0.644597	0.681858	0.540957	0.622202	0.668618	0.0688703	0.0260305
	523.466	0.76836	0.671743	0.722648	0.730508	0.662992	0.575055	0.6551	0.683772	0.0586378	0.022163
	524.092	0.818244	0.737085	0.687312	0.714244	0.640117	0.641717	0.631359	0.695725	0.0624357	0.0235985
	524.717	0.590871	0.638294	0.774994	0.603226	0.670486	0.570461	0.593489	0.634546	0.0651508	0.0246247
	525.342	0.634673	0.610599	0.638916	0.686735	0.650831	0.539236	0.643454	0.629206	0.0423341	0.0160008
	525.967	0.728818	0.746197	0.646901	0.490681	0.607841	0.602832	0.546915	0.624312	0.0852456	0.0322198
	526.592	0.702201	0.599809	0.682789	0.663374	0.625458	0.46606	0.536965	0.610951	0.0784104	0.0296363
	527.218	0.658855	0.624627	0.677565	0.691429	0.611851	0.537894	0.537645	0.619981	0.0579866	0.0219169
	527.843	0.679997	0.589499	0.707146	0.681058	0.588975	0.552643	0.577324	0.625235	0.0572979	0.0216566
	528.468	0.639995	0.579788	0.708462	0.597877	0.573265	0.540578	0.542391	0.59748	0.055158	0.0208478
	529.093	0.640604	0.690326	0.663125	0.663484	0.585229	0.567584	0.593375	0.629104	0.0434346	0.0164167
	529.718	0.653227	0.655319	0.650171	0.492974	0.593118	0.426407	0.553924	0.57502	0.0826367	0.0312338
	530.344	0.551175	0.542624	0.614261	0.603664	0.549469	0.472763	0.537418	0.553053	0.0432995	0.0163657
	530.969	0.604406	0.70891	0.659069	0.558906	0.579314	0.462612	0.486322	0.579934	0.0814742	0.0307943
	531.594	0.445471	0.679658	0.558008	0.496904	0.547826	0.430812	0.627289	0.540853	0.0847004	0.0320138
	532.219	0.425397	0.601608	0.592325	0.503452	0.539938	0.464336	0.537871	0.523561	0.0595709	0.0225157
	532.845	0.513001	0.576911	0.561852	0.5755	0.529618	0.47468	0.496947	0.532644	0.0371837	0.0140541
	533.47	0.517715	0.487831	0.556182	0.530197	0.504442	0.482151	0.453653	0.504596	0.0313248	0.0118397
	534.095	0.580833	0.452346	0.613412	0.559998	0.534352	0.470083	0.578228	0.541322	0.0554324	0.0209515
	534.72	0.529578	0.616955	0.572385	0.528887	0.47611	0.50533	0.499548	0.532685	0.0443181	0.0167507
	535.345	0.543266	0.571038	0.571642	0.568403	0.500301	0.380049	0.422452	0.508164	0.0723734	0.0273546
	535.971	0.535055	0.659275	0.539661	0.478018	0.484459	0.416638	0.534252	0.521051	0.0696067	0.0263089
	536.596	0.609275	0.602689	0.528852	0.627788	0.497737	0.413382	0.449583	0.532758	0.077631	0.0293418
	537.221	0.447905	0.525358	0.555035	0.523212	0.466447	0.351315	0.431043	0.471474	0.0646047	0.0244183
	537.846	0.39224	0.570557	0.532059	0.513933	0.491821	0.395757	0.461904	0.479753	0.0624815	0.0236158
	538.471	0.430567	0.412542	0.527535	0.464483	0.444887	0.386755	0.369998	0.433824	0.0486928	0.0184041
	539.096	0.580226	0.531593	0.516535	0.398221	0.474139	0.451503	0.397468	0.478526	0.0636648	0.024063
	539.722	0.497488	0.438677	0.539958	0.439594	0.430557	0.336951	0.353267	0.433785	0.0668249	0.0252574
	540.347	0.381443	0.498863	0.492093	0.446471	0.485379	0.395757	0.468912	0.452703	0.0437076	0.0165199
	540.972	0.495357	0.421893	0.49256	0.442759	0.440088	0.322202	0.419286	0.433449	0.0536757	0.0202875
	541.597	0.503723	0.435321	0.479373	0.42453	0.373763	0.298255	0.42245	0.419631	0.0629678	0.0237996
	542.222	0.322887	0.442515	0.487464	0.368093	0.46086	0.376026	0.38571	0.406222	0.0542927	0.0205207
	542.848	0.34844	0.427288	0.491413	0.429442	0.433975	0.322774	0.393173	0.406644	0.0527556	0.0199397
	543.473	0.49262	0.410864	0.474106	0.466557	0.427993	0.415489	0.395998	0.440518	0.0341542	0.0129091
	544.098	0.448362	0.465773	0.458541	0.355321	0.404395	0.320475	0.391138	0.406286	0.0510373	0.0192903
	544.723	0.349198	0.453904	0.51027	0.379117	0.40308	0.2814	0.399503	0.396639	0.0676955	0.0255865
	545.348	0.430414	0.413621	0.468458	0.302813	0.387304	0.323926	0.4376	0.394877	0.0565946	0.0213908
	545.974	0.299617	0.372618	0.425434	0.510439	0.381256	0.272395	0.411147	0.381844	0.0737962	0.0278923
	546.599	0.356348	0.409186	0.464571	0.235024	0.381519	0.258795	0.337553	0.348999	0.0749752	0.028338
	547.224	0.40745	0.454623	0.371644	0.392981	0.352399	0.386565	0.378249	0.391988	0.0301484	0.011395
	547.849	0.308289	0.379452	0.403583	0.36711	0.35608	0.348252	0.291093	0.350551	0.0364086	0.0137612
	548.475	0.415056	0.437478	0.390799	0.356958	0.35871	0.269907	0.392267	0.374453	0.0502694	0.0190001
	549.1	0.337641	0.407745	0.394303	0.329232	0.350888	0.288486	0.414878	0.360453	0.0432772	0.0163572
	549.725	0.300683	0.388203	0.398975	0.306088	0.344511	0.298063	0.381529	0.345436	0.0410474	0.0155145
	550.35	0.311026	0.35907	0.447052	0.287204	0.329655	0.354191	0.375311	0.35193	0.0478236	0.0180756
	550.975	0.270263	0.368423	0.396894	0.383484	0.340896	0.334652	0.35519	0.349972	0.0384763	0.0145427
	551.601	0.290341	0.332094	0.359816	0.391562	0.35378	0.296724	0.268822	0.327591	0.0407624	0.0154067
	552.226	0.280607	0.405348	0.378079	0.286549	0.339187	0.237915	0.330545	0.322604	0.0541139	0.0204531
	552.851	0.291557	0.364826	0.364233	0.37104	0.305136	0.208417	0.342642	0.321122	0.0541897	0.0204818
	553.476	0.278629	0.427409	0.363193	0.21603	0.309212	0.24979	0.268145	0.301773	0.0669036	0.0252872
	554.101	0.268134	0.274788	0.388697	0.388506	0.300076	0.277949	0.278884	0.311005	0.0499084	0.0188636
	554.726	0.2692	0.318308	0.316432	0.36973	0.334323	0.238682	0.237735	0.297773	0.046593	0.0176105
	555.352	0.244256	0.360629	0.319065	0.26035	0.305202	0.21148	0.270065	0.281578	0.0464486	0.0175559
	555.977	0.314827	0.368182	0.32482	0.275524	0.30323	0.195389	0.261361	0.291905	0.0508104	0.0192045
	556.602	0.224182	0.319508	0.319235	0.296593	0.258597	0.308217	0.247797	0.282018	0.0353636	0.0133662
	557.227	0.392849	0.299006	0.343359	0.339492	0.269114	0.175083	0.250849	0.295679	0.0664454	0.025114
	557.852	0.368818	0.26136	0.293731	0.206315	0.251301	0.231401	0.2513	0.266318	0.048628	0.0183797
	558.478	0.2692	0.326581	0.317897	0.229675	0.267208	0.151714	0.316301	0.268368	0.0576279	0.0217813
	559.103	0.208363	0.299965	0.302629	0.27203	0.251432	0.152863	0.244406	0.247384	0.0491445	0.0185749
	559.728	0.229201	0.250929	0.329916	0.284366	0.264184	0.174511	0.288832	0.260277	0.0457782	0.0173026
	560.353	0.289276	0.32634	0.270096	0.196163	0.258991	0.191748	0.209926	0.248934	0.0474261	0.0179254
	560.978	0.337184	0.32742	0.279631	0.24485	0.25117	0.240978	0.23084	0.273153	0.0399944	0.0151165
	561.604	0.247452	0.300206	0.289123	0.245504	0.241966	0.0915655	0.239656	0.236496	0.0633296	0.0239363
	562.229	0.225701	0.249133	0.241576	0.203695	0.241441	0.136583	0.265883	0.22343	0.0397378	0.0150195
	562.854	0.233611	0.279104	0.262409	0.171712	0.227702	0.12796	0.207552	0.215721	0.0483534	0.0182759
	563.479	0.210341	0.206451	0.305113	0.245505	0.23914	0.169529	0.220213	0.228042	0.0389738	0.0147307
	564.105	0.204409	0.256206	0.289696	0.235789	0.208376	0.162443	0.15781	0.21639	0.0445373	0.0168335
	564.73	0.184333	0.290973	0.233719	0.158065	0.222707	0.144435	0.213768	0.206857	0.0461062	0.0174265
	565.355	0.216272	0.285218	0.258735	0.236989	0.22343	0.175083	0.179968	0.225099	0.0368515	0.0139286
	565.98	0.133991	0.275988	0.270648	0.242993	0.212781	0.174508	0.21829	0.218457	0.0474101	0.0179193
	566.605	0.229655	0.270233	0.213885	0.15752	0.195821	0.1883	0.232873	0.212613	0.0336598	0.0127222
	567.231	0.211863	0.223594	0.249051	0.272904	0.183332	0.184852	0.207552	0.219021	0.0303555	0.0114733
	567.856	0.16867	0.235703	0.17995	0.201403	0.200488	0.142137	0.192969	0.18876	0.0271863	0.0102755
	568.481	0.225398	0.221917	0.233762	0.209153	0.206207	0.188493	0.20043	0.212194	0.014537	0.00549449
	569.106	0.187831	0.270112	0.209447	0.178371	0.172092	0.148455	0.168325	0.190662	0.0367413	0.0138869
	569.731	0.137034	0.25057	0.175151	0.207298	0.174129	0.146924	0.161768	0.178982	0.0359533	0.0135891
	570.356	0.111634	0.190985	0.220192	0.247251	0.159405	0.130451	0.220664	0.18294	0.0469118	0.017731
	570.982	0.287451	0.182712	0.188169	0.212975	0.188788	0.0842873	0.22383	0.195459	0.0563071	0.0212821
	571.607	0.21901	0.20705	0.19747	0.167235	0.180768	0.184855	0.171378	0.189681	0.0175829	0.00664571
	572.232	0.177184	0.21796	0.23064	0.212537	0.170579	0.131985	0.205517	0.192343	0.0317373	0.0119956
	572.857	0.181292	0.210166	0.214756	0.174659	0.165124	0.132557	0.188899	0.181065	0.0258886	0.00978499
	573.482	0.165017	0.20717	0.222103	0.220725	0.167358	0.126621	0.198846	0.186834	0.0325824	0.012315
	574.108	0.146312	0.211486	0.201144	0.220615	0.16026	0.173359	0.192743	0.18656	0.0254047	0.00960208
	574.733	0.187527	0.189665	0.216986	0.222799	0.1621	0.0955882	0.155664	0.175761	0.0401106	0.0151604
	575.358	0.132319	0.162571	0.192161	0.19529	0.162166	0.136005	0.15962	0.162876	0.0226	0.008542
	575.983	0.17597	0.248412	0.199105	0.140381	0.150399	0.15746	0.113611	0.169334	0.0407545	0.0154038
	576.609	0.116805	0.209087	0.207175	0.20173	0.198977	0.108231	0.165046	0.172436	0.0403278	0.0152425
	577.234	0.133991	0.16401	0.16706	0.174331	0.166768	0.139646	0.116663	0.151781	0.0200469	0.00757702
	577.859	0.231936	0.213524	0.143998	0.205333	0.154671	0.100757	0.169568	0.174255	0.0423553	0.0160088
	578.484	0.172927	0.194461	0.161433	0.142893	0.157367	0.12298	0.175673	0.161105	0.0215932	0.00816147
	579.109	0.173839	0.179355	0.195261	0.187103	0.140802	0.133517	0.119602	0.161354	0.0273423	0.0103344
	579.735	0.131709	0.193262	0.165298	0.144638	0.13561	0.144243	0.12729	0.148864	0.0214338	0.0081012
	580.36	0.146769	0.189305	0.179887	0.101193	0.142577	0.124319	0.117114	0.143023	0.0299669	0.0113264
	580.985	0.128365	0.167126	0.183667	0.136889	0.152437	0.126428	0.151594	0.149501	0.0193801	0.00732499
	581.61	0.153458	0.170365	0.175428	0.113637	0.15717	0.145585	0.144925	0.15151	0.0188081	0.0071088
	582.235	0.176577	0.192663	0.166126	0.149443	0.151123	0.100568	0.12028	0.150968	0.0295401	0.0111651
	582.861	0.135663	0.188588	0.169397	0.108397	0.13298	0.132367	0.126498	0.141984	0.025368	0.00958819
	583.486	0.137338	0.134637	0.183008	0.132851	0.145732	0.117426	0.139272	0.141466	0.018764	0.00709214
	584.111	0.193915	0.221796	0.17084	0.124444	0.162756	0.136387	0.122542	0.161812	0.034426	0.0130118
	584.736	0.0673775	0.214004	0.15381	0.155555	0.127984	0.110719	0.101515	0.132995	0.0436259	0.0164891
	585.361	0.101139	0.224555	0.157483	0.120624	0.156249	0.127577	0.148316	0.147992	0.0366083	0.0138366
	585.986	0.0973386	0.189546	0.142852	0.0478127	0.146784	0.129301	0.128646	0.12604	0.0408948	0.0154568
	586.612	0.158023	0.216162	0.143553	0.0809984	0.131994	0.136005	0.115871	0.140372	0.0383229	0.0144847
	587.237	0.108287	0.167486	0.150412	0.134378	0.15316	0.0975048	0.119829	0.133008	0.0237393	0.00897262
	587.862	0.115133	0.179116	0.130918	0.0864559	0.114048	0.122405	0.137237	0.126473	0.0262073	0.00990544
	588.487	0.162282	0.170363	0.139412	0.112982	0.138568	0.110145	0.119827	0.136225	0.0218741	0.00826762
	589.112	0.111786	0.236424	0.141642	0.112327	0.140867	0.169911	0.0894201	0.143197	0.0451098	0.0170499
	589.738	0.108898	0.189307	0.116626	0.184046	0.119045	0.118	0.136784	0.138958	0.0311924	0.0117896
	590.363	0.104789	0.199496	0.143086	0.155773	0.142709	0.116466	0.124236	0.140936	0.0288876	0.0109185
	590.988	0.123802	0.190384	0.140282	0.0849282	0.117993	0.15478	0.105471	0.131092	0.032012	0.0120994
	591.613	0.0968823	0.235944	0.150752	0.14191	0.141261	0.147309	0.11949	0.14765	0.0400885	0.015152
	592.238	0.0996199	0.22743	0.133253	0.144093	0.125355	0.131793	0.106942	0.138355	0.0390835	0.0147722
	592.864	0.167908	0.250449	0.123528	0.142346	0.142774	0.101717	0.127854	0.150939	0.0447817	0.0169259
	593.489	0.186768	0.211846	0.130769	0.118877	0.14021	0.127385	0.145717	0.151653	0.0318966	0.0120558
	594.114	0.0768041	0.22863	0.123166	0.0860187	0.148624	0.147501	0.140291	0.135862	0.0463792	0.0175297
	594.739	0.117868	0.173721	0.133827	0.169747	0.117138	0.1634	0.0963148	0.138859	0.0280799	0.0106132
	595.365	0.0733091	0.229709	0.12013	0.105123	0.143497	0.143861	0.0813928	0.128146	0.0486751	0.0183975
	595.99	0.0371108	0.213644	0.162134	0.0470481	0.138765	0.142326	0.0902103	0.118748	0.0591175	0.0223443
	596.615	0.1381	0.227432	0.095157	0.112	0.141854	0.143476	0.0845569	0.134654	0.0436418	0.0164951
	597.24	0.098858	0.222397	0.151282	0.1525	0.122265	0.177381	0.159508	0.154884	0.0364634	0.0137819
	597.865	0.132928	0.255605	0.127371	0.107634	0.131797	0.189067	0.103209	0.149659	0.0504225	0.0190579
	598.49	0.163498	0.257164	0.150773	0.119859	0.128576	0.20171	0.0910022	0.15894	0.0515885	0.0194986
	599.116	0.114068	0.252129	0.10741	0.103485	0.1245	0.179683	0.0748373	0.136587	0.0555755	0.0210056
	599.741	0.139313	0.255725	0.131278	0.20326	0.140605	0.144628	0.08795	0.157537	0.050778	0.0191923
	600.366	0.0892785	0.240139	0.113972	0.0703011	0.114903	0.181404	0.110219	0.131459	0.0545847	0.0206311
	600.991	0.0793912	0.280302	0.130811	0.112982	0.128641	0.16244	0.064887	0.137065	0.0658859	0.0249025
	601.616	0.15787	0.249372	0.115543	0.135251	0.124302	0.160141	0.0721242	0.144943	0.0506958	0.0191612
	602.242	0.113155	0.26232	0.119196	0.1537	0.13127	0.140413	0.0997061	0.14568	0.0503949	0.0190475
	602.867	0.123955	0.249131	0.140749	0.112764	0.14869	0.199794	0.119037	0.156303	0.0465051	0.0175773
	603.492	0.0536894	0.264597	0.103906	0.108615	0.129628	0.18351	0.0780014	0.131707	0.0661435	0.0249999
	604.117	0.0879074	0.256684	0.0837532	0.118985	0.132322	0.244429	0.0910022	0.145012	0.0687889	0.0259997
	604.742	0.0803037	0.285578	0.113696	0.122916	0.118715	0.195389	0.0794699	0.142295	0.0685444	0.0259074
	605.368	0.129125	0.268913	0.134188	0.136016	0.140408	0.213011	0.0552793	0.153848	0.0631917	0.0238842
	605.993	0.106464	0.28294	0.0999771	0.0763039	0.133242	0.201136	0.103662	0.143389	0.0678641	0.0256502
	606.618	0.106615	0.263399	0.132277	0.113529	0.162559	0.19309	0.0836531	0.150732	0.0570696	0.0215703
	607.243	0.0637251	0.297447	0.111041	0.10163	0.150004	0.165506	0.095862	0.140745	0.0713275	0.0269593
	607.869	0.0979477	0.305121	0.120682	0.078814	0.134558	0.148266	0.0878364	0.139032	0.0716765	0.0270912
	608.494	0.113611	0.330177	0.103906	0.106542	0.137844	0.211862	0.126498	0.161491	0.076908	0.0290685
	609.119	0.140228	0.282819	0.125948	0.136669	0.122659	0.217609	0.0851233	0.158722	0.0626641	0.0236848
	609.744	0.102661	0.269393	0.0904	0.108835	0.142051	0.21991	0.0680528	0.143043	0.068733	0.0259786
	610.369	0.0713311	0.34756	0.109108	0.10152	0.137317	0.164164	0.0775503	0.144079	0.0883226	0.0333828
	610.995	0.0506461	0.267114	0.0970045	0.123681	0.128247	0.164549	0.0759666	0.129601	0.0658367	0.0248839
	611.62	0.0955135	0.274069	0.112166	0.131757	0.142182	0.159952	0.111688	0.146761	0.0556527	0.0210347
	612.245	0.144029	0.255006	0.103566	0.142783	0.13883	0.17585	0.0756274	0.147956	0.052868	0.0199822
	612.87	0.0949044	0.266875	0.107601	0.115384	0.14639	0.168572	0.0567494	0.136639	0.062673	0.0236882
	613.495	0.0611403	0.284499	0.122848	0.0996633	0.139488	0.199412	0.0715578	0.139801	0.0729326	0.0275659
	614.12	0.0947515	0.29409	0.110404	0.0936606	0.142116	0.216841	0.0361757	0.141148	0.080617	0.0304703
	614.746	0.101748	0.336772	0.111593	0.111672	0.123316	0.176999	0.0990279	0.15159	0.0794422	0.0300263
	615.371	0.0930793	0.255127	0.0852821	0.150425	0.121673	0.168954	0.0569749	0.133074	0.0612838	0.0231631
	615.996	0.106615	0.300564	0.0978751	0.0971532	0.114443	0.195007	0.0611565	0.138973	0.0759638	0.0287116
	616.621	0.0431929	0.255605	0.0967497	0.100647	0.133572	0.130451	0.0932625	0.121926	0.061162	0.023117
	617.246	0.100227	0.283301	0.0738576	0.10021	0.133966	0.212629	0.0669218	0.13873	0.0743695	0.028109
	617.872	0.0605335	0.241339	0.115415	0.0896227	0.123382	0.157845	0.0426176	0.118679	0.0616704	0.0233092
	618.497	0.101445	0.200097	0.0697377	0.106323	0.117007	0.213396	0.0750628	0.126153	0.053398	0.0201825
	619.122	0.0860824	0.242297	0.0854095	0.0698639	0.123711	0.172402	0.0920179	0.12454	0.0575891	0.0217666
	619.747	0.0692003	0.248532	0.0849636	0.149988	0.118583	0.152863	0.0552793	0.12563	0.0612685	0.0231573
	620.372	0.107983	0.246613	0.0826491	0.0839441	0.108461	0.187918	0.0751764	0.127535	0.0600335	0.0226905
	620.998	0.0786315	0.256204	0.0842628	0.0956255	0.109316	0.139646	0.0341392	0.113975	0.0651944	0.0246412
	621.623	0.0577936	0.269992	0.0727532	0.0885289	0.132782	0.172594	0.0425057	0.119564	0.0741846	0.0280391
	622.248	0.0164258	0.211966	0.0846451	0.0804531	0.123251	0.17949	0.0776623	0.110556	0.0617798	0.0233506
	622.873	0.0608369	0.292772	0.0891259	0.0745567	0.123448	0.155162	0.0491748	0.120725	0.0780378	0.0294955
	623.498	0.0559685	0.233426	0.0862804	0.094643	0.104254	0.150375	0.069523	0.113496	0.0562746	0.0212698
	624.124	0.0974914	0.213524	0.0640467	0.0915859	0.105568	0.150375	0.0718969	0.113498	0.0483149	0.0182613
	624.749	0.0282888	0.211486	0.0839446	0.0828536	0.0907128	0.118572	0.0365148	0.0931961	0.0563926	0.0213144
	625.374	0.0866915	0.180795	0.0715852	0.064187	0.101164	0.14999	0.0395654	0.0991398	0.0462022	0.0174628
	625.999	0.0869949	0.227312	0.0890195	0.0842732	0.107541	0.170678	0.0416002	0.115345	0.0580144	0.0219274
	626.625	0.0296576	0.28174	0.0788267	0.100646	0.0859799	0.111679	0.0614973	0.107147	0.0754834	0.0285301
	627.25	0.0921667	0.243856	0.0560193	0.0281637	0.107672	0.141177	0.0420529	0.101587	0.0686039	0.0259298
	627.875	0.066919	0.227671	0.0878941	0.0380979	0.0989953	0.1316	0.0516624	0.100406	0.059411	0.0224552
	628.5	0.108136	0.192663	0.0859405	0.0744487	0.094788	0.136772	0.0516607	0.106344	0.0429907	0.016249
	629.125	0.0698095	0.128043	0.099871	0.0829616	0.0870971	0.142519	0.0705404	0.097263	0.0261259	0.00987467
	629.75	0.0529274	0.203694	0.0611586	0.0659341	0.0932103	0.0881175	0.0462345	0.0873252	0.0501296	0.0189472
	630.376	0.0442583	0.225992	0.0574636	0.048358	0.0979442	0.117808	0.0498531	0.0916681	0.0607188	0.0229495
	631.001	0.0725471	0.243258	0.0747495	0.0231417	0.0915677	0.142901	0.074722	0.103269	0.0657885	0.0248657
	631.626	0.0612932	0.233187	0.0719464	0.0588391	0.106817	0.109952	0.059237	0.100182	0.0579718	0.0219113
	632.251	0.0758916	0.221676	0.0615195	0.114182	0.0842702	0.111297	0.0555065	0.103478	0.0525603	0.0198659
	632.876	0.05384	0.171203	0.0697166	0.0339503	0.0866376	0.128919	0.0316516	0.0822741	0.0477601	0.0180516
	633.502	0.0955112	0.191704	0.0709267	0.0629867	0.0778947	0.0852412	0.0809417	0.0950295	0.0406058	0.0153475
	634.127	0.048821	0.202974	0.068145	0.0339503	0.0905807	0.127385	0.0411474	0.087572	0.0558332	0.021103
	634.752	0.0564248	0.189665	0.0593958	0.0553449	0.0982065	0.113593	0.0564086	0.0898626	0.0462141	0.0174673
	635.377	0.0292013	0.194101	0.0608187	0.0627689	0.0721758	0.115702	0.0244178	0.0798837	0.0543659	0.0205484
	636.003	0.0634217	0.196141	0.0594598	0.0694267	0.0845335	0.134666	0.0799226	0.0982244	0.046262	0.0174854
	636.628	0.0713288	0.187268	0.0604791	0.0950802	0.0740818	0.109955	0.0778878	0.0965829	0.0400033	0.0151198
	637.253	0.074525	0.149382	0.0683788	0.036788	0.0944596	0.0946285	0.054601	0.0818232	0.0335752	0.0126902
	637.878	0.0652468	0.150342	0.0426412	0.0326387	0.0817066	0.0499966	0.0513232	0.0676993	0.0367827	0.0139026
	638.503	0.0539928	0.213524	0.0766817	0.0759764	0.0679035	0.0902237	0.042504	0.0886865	0.052997	0.020031
	639.129	0.0302667	0.166527	0.0714154	0.0791432	0.0715191	0.115509	0.0737062	0.0868696	0.0397796	0.0150353
	639.754	0.0571867	0.219519	0.0693344	0.0437748	0.087952	0.072791	0.0832021	0.0905372	0.0544588	0.0205835
	640.379	0.0293519	0.192184	0.0584615	0.102283	0.0751989	0.0532549	0.0593489	0.0814405	0.0496578	0.0187689
	641.004	0.0433457	0.17528	0.0515599	0.068662	0.0750027	0.0936717	0.0360604	0.0776546	0.0438557	0.0165759
	641.629	0.0615966	0.173001	0.0492878	0.0505407	0.073294	0.0936717	0.0539227	0.0793307	0.0408967	0.0154575
	642.255	0.031939	0.17612	0.0625815	0.0689895	0.0703349	0.132175	0.0375322	0.0828102	0.0486053	0.0183711
	642.88	0.017644	0.165328	0.0348476	0.05207	0.0750678	0.0957808	0.04013	0.0686954	0.0462236	0.0174709
	643.505	0.0529274	0.156217	0.0278189	0.088203	0.0709926	0.0967347	0.0426176	0.0765017	0.0396505	0.0149865
	644.13	0.0197725	0.15418	0.0527069	0.0813259	0.0621846	0.127385	0.0126617	0.072888	0.0487263	0.0184168
	644.755	0.0507989	0.14135	0.0554463	0.0638595	0.0609353	0.0611079	0.023514	0.0652875	0.0335427	0.012678
	645.38	0.0593152	0.127442	0.0625815	0.119204	0.074345	0.0808393	0.0470281	0.0815365	0.0283405	0.0107117
	646.006	0.0403024	0.144708	0.0580369	0.0706269	0.0588312	0.0988438	0.0469145	0.0740377	0.0337687	0.0127634
	646.631	-0.00243421	0.157895	0.0440214	0.0318757	0.0675741	0.0522952	0.0491748	0.0572003	0.0458364	0.0173245
	647.256	0.0133847	0.125885	0.0381394	0.04563	0.0562025	0.0959704	0.0246434	0.0571221	0.0372224	0.0140687
	647.881	0.0567305	0.115334	0.0362492	0.0723741	0.059621	0.108613	0.0335745	0.068928	0.0299844	0.011333
	648.506	0.0495807	0.139552	0.0511566	0.00720466	0.0629734	0.101335	0.0249825	0.0623978	0.0417579	0.015783
	649.132	0.0628125	0.118572	0.0455928	0.0449751	0.0528501	0.0634065	0.0400181	0.0611754	0.0248547	0.00939419
	649.757	0.0775661	0.187629	0.0312374	0.0653872	0.0599493	0.0846694	0.0212537	0.0753846	0.0505783	0.0191168
	650.382	0.0220539	0.100826	0.0467822	0.0282734	0.0658003	0.0356297	0.0360621	0.0479183	0.0252609	0.00954772
	651.007	0.0577936	0.147945	0.0495426	0.0325307	0.0716503	0.0982691	0.0567477	0.073497	0.0357346	0.0135064
	651.632	0.00273763	0.144827	0.0509868	0.0761942	0.0816415	0.0266275	0.0350447	0.0597227	0.0431316	0.0163022
	652.258	0.00213079	0.131521	0.0395196	0.0195394	0.0794062	0.0794945	0.0352702	0.0552688	0.0409391	0.0154735
	652.883	0.0272234	0.0932751	0.0405176	0.0344939	0.0558081	0.0823679	0.00497513	0.0483802	0.028815	0.0108911
	653.508	0.010038	0.140511	0.0453806	0.0576373	0.0523896	0.0898415	0.0582196	0.0648596	0.0377657	0.0142741
	654.133	0.0389359	0.107541	0.0247609	0.0436651	0.0581745	0.0787302	0.0599136	0.0588174	0.0255143	0.00964351
	654.759	0.0351329	0.13056	0.0462725	0.0613477	0.0696122	0.0476979	0.0158275	0.0580644	0.0337133	0.0127424
	655.384	0.0342203	0.124806	0.0382241	0.0642967	0.0473284	0.0637887	0.0548265	0.06107	0.0281594	0.0106433
	656.009	0.0501898	0.121569	0.0277548	0.00414759	0.0588972	0.0509534	0.00712187	0.0458048	0.0368681	0.0139348
	656.634	0.0384796	0.137635	0.0346779	0.0313288	0.0398347	0.0595735	0.0350447	0.0537963	0.035282	0.0133354
	657.259	0.0325458	0.126964	0.022255	0.0685523	0.0615269	0.0657024	0.0370778	0.059232	0.0322752	0.0121989
	657.885	0.0524712	0.103945	0.0381177	0.0638595	0.0612637	0.0609153	0.0262271	0.0581142	0.0226769	0.00857107
	658.51	0.00623494	0.123128	0.0364403	0.0469383	0.0582396	0.0488472	0.0342528	0.050583	0.033319	0.0125934
	659.135	0.0252478	0.137153	0.0259077	0.0361314	0.0571885	0.0340953	0.0227221	0.0483494	0.0378168	0.0142934
	659.76	0.0646376	0.111018	0.0440425	0.0378785	0.0570564	0.0647455	0.029844	0.0584603	0.0247625	0.00935936
	660.385	0.0620529	0.112936	0.0301544	0.0267457	0.0470001	0.086586	0.00531427	0.0529699	0.0344829	0.0130333
	661.01	0.0304196	0.102026	0.0352936	0.0663696	0.0648143	0	0.0325571	0.0473543	0.0305872	0.0115609
	661.636	0.0138387	0.128521	0.0395406	0.0383157	0.0554797	0.0906058	0.0304104	0.0566731	0.0367812	0.013902
	662.261	0.0462339	0.0888385	0.0511779	0.0356958	0.0669165	0.0798795	0.0462362	0.0592826	0.0181995	0.00687878
	662.886	0.0573373	0.122288	0.0262049	0.0291461	0.0491693	0.0651306	0.0204601	0.0528194	0.0323531	0.0122283
	663.511	0.0425861	0.107302	0.0327453	0.0529444	0.0495637	0.0390778	0.0139046	0.0483034	0.0268518	0.010149
	664.136	0.0323952	0.116774	0.0242723	0.0193216	0.0414774	0.103823	0.0429584	0.0544318	0.0363583	0.0137421
	664.762	0.0232698	0.115573	0.0320022	0.0228142	0.0434504	0.04808	0.0186525	0.043406	0.0311727	0.0117822
	665.387	0.00790946	0.108379	0.0317047	0.0180116	0.0598833	0.0584241	0.0307478	0.0450086	0.0314021	0.0118689
	666.012	0.0532331	0.103225	0.0203011	0.0154998	0.0531794	0.0837097	0.0464617	0.0536586	0.0292305	0.0110481
	666.637	0.0302667	0.109699	0.041176	0.0307835	0.0441071	0.0739403	0.0145829	0.0492223	0.0299012	0.0113016
	667.263	0.048821	0.107901	0.0245695	0.0121169	0.0422662	0.0672367	0.0410355	0.0491353	0.0289527	0.0109431
	667.888	0.0396956	0.121209	0.0134421	0.0436651	0.0549542	0.0515281	0.0487237	0.0533168	0.0304842	0.0115219
	668.513	0.0403024	0.105864	0.0451044	0.0482499	0.0465396	0.0373537	0.0426176	0.0522902	0.0221408	0.00836842
	669.138	0.0454742	0.0968718	0.0217877	0.0308932	0.042069	0.0233691	0.0314261	0.0416987	0.0239439	0.00904994
	669.763	0.0346766	0.0897989	0.0329788	0.0344956	0.0477228	0.033331	0.0210265	0.0420043	0.0207841	0.00785565
	670.389	0.0104942	0.117012	0.0400079	0.0205235	0.0454875	0.0833276	0.0386616	0.0507877	0.0343829	0.0129955
	671.014	0.0556651	0.0998678	0.0271391	0.00578501	0.0393082	0.018197	0.0409219	0.0409835	0.0283739	0.0107243
	671.639	0.0127756	0.0749319	0.041176	0.0223787	0.0370079	0.0839023	0.0256625	0.0425478	0.0249851	0.00944348
	672.264	0.0358926	0.0841628	0.0197281	0.0181214	0.0359568	0.0570851	0.0213656	0.0389018	0.0223731	0.00845625
	672.889	0.0404575	0.0816451	0.020025	0.0155015	0.0436476	0.056318	0.0297321	0.0410467	0.0210816	0.00796811
	673.514	0.031939	0.0790087	0.0208321	0.0125525	0.0437127	0.0415661	0.0334626	0.037582	0.0197321	0.00745802
	674.14	0.0412172	0.0891982	0.0196641	0.0194313	0.0372711	0.061875	0.0229477	0.0416578	0.0239526	0.00905322
	674.765	0.0310264	0.0720545	0.0306854	0.0235789	0.0338526	0.0478904	0.0284875	0.0382251	0.0154687	0.00584662
	675.39	0.0597715	0.080086	0.0230832	0.021722	0.0399008	0.062829	0.0410355	0.0469183	0.0200188	0.00756639
	676.015	0.0243352	0.0762501	0.0196431	0.000872746	0.0474595	0.0375434	0.0444269	0.0357901	0.022239	0.00840556
	676.64	0.0395427	0.0677385	0.0172646	-0.00469449	0.046934	0.016473	-0.00226034	0.0258568	0.0247024	0.00933664
	677.266	0.0468453	0.0768507	0.0271391	-0.00283765	0.0399669	0.0227944	0.0186525	0.032773	0.0232731	0.00879639
	677.891	0.010038	0.0677385	0.0239538	0.0347134	0.0577801	0.086201	0.0130008	0.0419179	0.0270091	0.0102085
	678.516	0.0229641	0.106822	0.0332763	-0.00163742	0.035168	0.0827529	0.0390007	0.0454781	0.0341768	0.0129176
	679.141	0.0170326	0.0846412	0.0200253	0.0153918	0.0279366	0.0214554	0.0330099	0.0313561	0.0224886	0.00849989
	679.766	0.0232698	0.0810445	0.0235505	0.00120187	0.032275	0.0210733	0.0452171	0.0325189	0.0232802	0.00879909
	680.392	0.0298082	0.0799673	0.0159481	-0.0135366	0.0491693	0.0513384	0.0304087	0.034729	0.0274019	0.010357
	681.017	0.0264637	0.0848822	0.00505418	0.0138624	0.0404264	0.0415661	0.0107388	0.0318562	0.0253451	0.00957956
	681.642	0.0237261	0.121689	0.0256528	0.0243436	0.0512074	0.0312249	0.0276956	0.0436485	0.0330578	0.0124947
	682.267	-0.0243352	0.068938	0.025419	0.0174664	0.0374683	0.0595764	0.0217047	0.0294625	0.0283949	0.0107323
	682.892	0.0150569	0.0860817	0.0244848	0.0256535	0.0278054	0.0547865	0.0202363	0.0363007	0.0234654	0.00886909
	683.518	0.036958	0.0909966	0.0224038	0.00480256	0.027411	0.0367791	0.0288266	0.0354539	0.0248062	0.00937585
	684.143	0.0466902	0.0752898	0.0184536	0.00523975	0.0323411	0.0570823	0.0146965	0.0356847	0.0233698	0.00883295
	684.768	0.0153604	0.0908761	0.019473	0.00523975	0.0331299	0.00689608	0.0226102	0.027655	0.0272654	0.0103053
	685.393	0.00030342	0.085481	0.022722	-0.000764676	0.044042	0.0505712	0.0106268	0.030426	0.0291642	0.011023
	686.019	-0.00942884	0.0495158	0.0146526	-0.00469285	0.0374683	0.0277768	0.018427	0.0191027	0.0197774	0.00747517
	686.644	0.0337641	0.06546	0.0226583	0.0195394	0.027411	0.00689608	0.0167313	0.0274943	0.0173514	0.00655823
	687.269	0.0352834	0.0658196	0.0145889	-0.0118975	0.0447648	0.0402271	0.0124344	0.0287458	0.0236764	0.00894883
	687.894	0.0197725	0.083323	0.024803	0.00927763	0.0180114	0.0235616	0.0350447	0.030542	0.0227186	0.00858682
	688.519	0.0240295	0.0776888	0.0225946	0.0211768	0.0435155	0.0691504	0.0359485	0.0420149	0.0213236	0.00805955
	689.144	-0.00121596	0.0791274	0.00974715	0.0466125	0.0378627	0.0271993	0.0437486	0.034726	0.0244261	0.0092322
	689.77	0.0187071	0.0680982	0.0271605	0.0359136	0.0343131	0.0683861	0.022383	0.0392802	0.0191583	0.00724116
	690.395	0.0177946	0.0629423	0.0181991	-0.0138624	0.0358907	0.0180074	0.0510977	0.0271528	0.0234954	0.00888042
	691.02	0.0252455	0.0611439	0.0162879	0.00382011	0.0304341	0.03467	0.0275837	0.028455	0.0163754	0.00618934
	691.645	0.0360454	0.0773291	0.0198976	0.0360233	0.0360228	0.0492294	0.022383	0.0395615	0.0178847	0.00675978
	692.27	0.0197702	0.0308129	0.0138671	0.0263085	0.0328015	0.0249006	0.0240787	0.0246485	0.00594803	0.00224814
	692.896	0.0305702	0.0802065	0.016415	0.0305658	0.0222838	-0.00747075	0.0139046	0.0266393	0.024927	0.00942152
	693.521	0.0330044	0.071934	0.0273092	0.0358055	0.0272138	0.0593838	0.0362876	0.0415626	0.015961	0.0060327
	694.146	0.0316355	0.0558694	0.0141856	0.0160467	0.0400319	0.039845	-0.0018076	0.0279724	0.0181155	0.00684701
	694.771	0.00745319	0.0882397	0.0098322	0.00753214	0.0230726	0.0170477	0.00780014	0.0229968	0.0271952	0.0102788
	695.396	-0.014295	0.0531107	0.00938625	0.0187763	0.0326704	0.0224122	0.0192172	0.0201826	0.0190988	0.00721867
	696.022	0.00273763	0.0678572	0.0180714	-0.00141965	0.0280026	0.0505712	0.000566358	0.0237695	0.0248644	0.00939785
	696.647	0.0333078	0.0561085	0.0104269	0.012225	0.0299096	0.0369687	0.0092686	0.0268879	0.0160456	0.00606465
	697.272	0.0139915	0.0445991	0.00114672	0.0239064	0.0509441	0.0268171	0.0188797	0.025755	0.0159703	0.0060362
	697.897	-0.00562582	0.0504743	0.0152046	0.0221609	0.0299086	0.0385031	0.0241906	0.0249738	0.0164663	0.00622367
	698.523	0.0497335	0.0375262	0.0163513	0.000217777	0.0328666	0.0536371	0.0194427	0.0299679	0.0177188	0.0066971
	699.148	-0.00578095	0.0690567	0.0184326	0.0272909	0.0362191	0.0314174	0.0195563	0.0280274	0.0209399	0.00791455
	699.773	0.0580993	0.0449588	0.0245908	0.0157193	0.034181	0.0285411	0.0365131	0.0346576	0.0128547	0.00485863
	700.398	0.0237261	0.0732522	-0.000297192	-0.00447508	0.0294491	0.0183895	0.0285994	0.024092	0.023632	0.00893206
	Hv1-G199Anap
	Wavelenght (nm)	Cell_1	Cell_2	Cell_3	Cell_4	Cell_5	Cell_6	Average	S.D.	S.E.M.
	405.929	-0.000108059	0.0159766	-0.00259854	0.0131644	-0.017689	-0.00460726	0.000689703	0.0113033	0.00461456
	406.554	0.00138432	0.00947754	0.00933597	0.0117437	0.0353779	-0.00392852	0.0105652	0.0123431	0.00503905
	407.179	-0.00101699	0.0163072	0.0166509	0.00284145	-0.00849071	0.00188891	0.00469679	0.00908832	0.00371029
	407.805	0.00266091	0.00903623	0.0201141	0.015628	-0.0195746	-0.0127668	0.0025163	0.014409	0.00588244
	408.43	0.00222803	0.0230294	0.0117425	0.00729257	-0.0025932	0.00324865	0.00749133	0.00823554	0.00336214
	409.055	0.0043269	0.00848417	0.00664071	0.00842915	-0.0103764	-0.00755449	0.00165835	0.00768213	0.00313622
	409.68	0.00127626	0.0158675	0.0120298	0.0190377	-0.0161553	0.0117844	0.00730673	0.0118328	0.00483073
	410.305	0.00408872	0.0317351	0.0207883	-0.00738776	0.0173352	-0.00498572	0.0102623	0.0141659	0.00578322
	410.93	0.0027044	0.0138841	0.0244465	0.0115547	-0.000944591	-0.00294611	0.0081165	0.00953529	0.00389276
	411.556	-0.00283387	0.0235815	0.0230028	0.0160073	-0.00188564	0.00196483	0.00997282	0.0112558	0.00459515
	412.181	0.00915094	0.011461	0.0196334	0.0218791	0.0017689	-0.00135974	0.0104223	0.00849016	0.00346609
	412.806	-0.00227151	0.0212675	0.0116458	0.0425265	0.0255889	-0.00173707	0.01617	0.0157617	0.00643468
	413.431	0.00151445	0.00319499	0.013088	0.015628	0.00849071	0.00339935	0.00755257	0.00531396	0.00216942
	414.057	0.00545162	0.00947754	0.00356	0.0107975	-0.00424535	0.0078559	0.00548287	0.00496942	0.00202876
	414.682	0.00330992	0.00760319	0.0102974	0.0166708	-0.000353779	-0.000528033	0.00616658	0.00612317	0.00249977
	415.307	0.00214171	0.011461	0.00423417	0.0305924	0.0166276	-0.0145039	0.0084255	0.0138484	0.00565359
	415.932	0.00248795	0.00738336	0.0043309	0.021595	-0.00212268	0.00876353	0.00707301	0.00738179	0.0030136
	416.557	2.14171e-05	0.0189534	-0.000674176	0.0035035	-0.00601425	-0.00445655	0.0018889	0.00823192	0.00336067
	417.183	0.0091292	0.00793377	0.0143396	0.0140183	0.00731085	-0.00362598	0.00818429	0.00595992	0.00243313
	417.808	0.00298541	0.0186212	0.00837307	0.0107975	-0.0172184	0.00196369	0.00425374	0.0110614	0.00451578
	418.433	0.00367758	0.00363631	0.00654543	0.0261413	0.00401009	0.00694941	0.00849335	0.00800532	0.00326816
	419.058	0.00166599	0.00584124	0.01588	0.0142072	0.00377306	-0.00619362	0.00586231	0.0074979	0.003061
	419.683	0.00709555	0.00650073	0.00567781	0.00691324	-0.00813693	-0.0117085	0.00105698	0.00784466	0.00320257
	420.308	0.0038726	0.0315152	-0.00991343	0.0183756	0.0142697	-0.00256878	0.00925849	0.0137844	0.00562744
	420.934	0.0035481	0.0186212	-0.00798762	0.0294558	0.00955204	-0.0101221	0.00717791	0.0139961	0.0057139
	421.559	0.00677105	0.0124511	0.00923925	0.0144914	-0.000235263	-0.00264356	0.00667898	0.00626672	0.00255838
	422.184	0.00462966	0.0198344	0.0098167	0.0172376	-0.00778315	0.00694941	0.00844745	0.00902826	0.00368577
	422.809	0.00813395	0.0460588	0.00991343	0.0161011	-0.0108486	0.0100474	0.0132343	0.016896	0.00689777
	423.435	0.011206	0.0317351	0.039941	0.0465997	0.0127361	0.0136733	0.0259819	0.0141323	0.00576948
	424.06	0.0115308	0.052781	0.0334923	0.0278462	-0.00849071	0.0185831	0.0226238	0.018984	0.00775018
	424.685	0.0233206	0.054105	0.0330115	0.0318242	0.0357317	0.0292344	0.0345379	0.00955636	0.00390137
	425.31	0.0297243	0.0641313	0.0430203	0.0522826	0.0366745	0.0297636	0.0425994	0.0124042	0.00506401
	425.935	0.0316282	0.0794484	0.036957	0.05844	0.0411552	0.0498572	0.049581	0.0159336	0.00650488
	426.56	0.0534564	0.0782369	0.0682362	0.100303	0.0456375	0.0777319	0.0706003	0.0178609	0.00729168
	427.186	0.0646624	0.100494	0.102882	0.0753935	0.0604963	0.0587714	0.0771167	0.0181715	0.0074185
	427.811	0.0721474	0.10942	0.101535	0.125782	0.0977616	0.0532565	0.0933171	0.0239916	0.00979453
	428.436	0.0811685	0.112395	0.128388	0.127297	0.0992953	0.0725195	0.103511	0.0213736	0.00872574
	429.061	0.105398	0.165398	0.130793	0.139799	0.0954019	0.10893	0.124287	0.0238048	0.00971827
	429.687	0.0997303	0.141927	0.168423	0.17276	0.102124	0.103114	0.131346	0.0312312	0.0127501
	430.312	0.141202	0.18391	0.193831	0.199754	0.202834	0.145191	0.177787	0.0251852	0.0102818
	430.937	0.157708	0.211787	0.225879	0.212634	0.191159	0.12638	0.187591	0.034955	0.0142703
	431.562	0.161753	0.206828	0.216064	0.175222	0.173941	0.152896	0.181117	0.0228765	0.0093393
	432.187	0.173478	0.24253	0.25841	0.232621	0.242457	0.183792	0.222215	0.0318654	0.013009
	432.812	0.219644	0.24837	0.291806	0.259045	0.196229	0.209099	0.237365	0.0325579	0.0132917
	433.438	0.194052	0.263467	0.281797	0.237734	0.253543	0.193083	0.237279	0.0335516	0.0136974
	434.063	0.243008	0.301703	0.348398	0.286418	0.285735	0.266208	0.288578	0.0325075	0.0132711
	434.688	0.226502	0.314815	0.366202	0.310854	0.264746	0.219598	0.283786	0.0520448	0.0212472
	435.313	0.25376	0.314485	0.392186	0.315021	0.29741	0.260013	0.305479	0.0456387	0.0186319
	435.938	0.275047	0.362087	0.40489	0.316158	0.266866	0.262808	0.314643	0.0531272	0.0216891
	436.564	0.260899	0.395035	0.42337	0.355559	0.314275	0.29174	0.340146	0.0569636	0.0232553
	437.189	0.292874	0.322089	0.480826	0.344099	0.326066	0.296877	0.343805	0.0637148	0.0260115
	437.814	0.271305	0.385338	0.460904	0.322599	0.296467	0.289322	0.337656	0.0659868	0.026939
	438.439	0.287422	0.425009	0.507485	0.385016	0.322293	0.319313	0.374423	0.0749448	0.0305961
	439.065	0.295664	0.418506	0.519322	0.363326	0.317812	0.344166	0.376466	0.0745658	0.0304414
	439.69	0.316086	0.469304	0.512298	0.379144	0.32807	0.319238	0.387357	0.0770579	0.0314588
	440.315	0.348039	0.480434	0.526637	0.372514	0.355195	0.358368	0.406864	0.070024	0.0285872
	440.94	0.355242	0.514814	0.541266	0.390604	0.35543	0.386016	0.423895	0.0752616	0.0307254
	441.565	0.344577	0.495199	0.51528	0.414472	0.404724	0.347715	0.420328	0.0657143	0.0268277
	442.19	0.373869	0.556906	0.576587	0.490623	0.331491	0.398631	0.454684	0.0926018	0.0378045
	442.816	0.386308	0.554924	0.570716	0.432373	0.393875	0.434437	0.462105	0.0735546	0.0300285
	443.441	0.409348	0.58214	0.610271	0.430668	0.421822	0.421369	0.47927	0.0833143	0.0340129
	444.066	0.430289	0.54776	0.607866	0.498294	0.486917	0.388433	0.49326	0.0720238	0.0294036
	444.691	0.425638	0.59988	0.584574	0.496116	0.477839	0.376195	0.493374	0.0798218	0.0325871
	445.317	0.414172	0.613875	0.632119	0.514586	0.456966	0.490715	0.520406	0.0789958	0.0322499
	445.942	0.435351	0.592277	0.635102	0.503031	0.516753	0.424013	0.517754	0.0765067	0.0312337
	446.567	0.457872	0.648144	0.651559	0.477268	0.465455	0.484898	0.530866	0.084571	0.034526
	447.192	0.485324	0.64021	0.684282	0.515911	0.504843	0.548278	0.563142	0.0736211	0.0300557
	447.817	0.479159	0.62247	0.708728	0.536087	0.469701	0.539591	0.559289	0.0833639	0.0340332
	448.442	0.517623	0.619936	0.695639	0.545083	0.501541	0.508846	0.564778	0.0705997	0.0288222
	449.068	0.530646	0.666656	0.716523	0.589127	0.549655	0.545558	0.599694	0.0688559	0.0281103
	449.693	0.53679	0.701917	0.708054	0.591967	0.563687	0.610826	0.618874	0.0650913	0.0265734
	450.318	0.516044	0.701588	0.720855	0.610816	0.465809	0.572376	0.597915	0.0920469	0.037578
	450.943	0.543973	0.67977	0.798713	0.557208	0.484441	0.546465	0.601761	0.10569	0.0431476
	451.568	0.538521	0.749852	0.750016	0.540443	0.642347	0.559609	0.630131	0.0915281	0.0373662
	452.194	0.55877	0.72065	0.734424	0.64444	0.650717	0.605915	0.652486	0.0610731	0.024933
	452.819	0.558792	0.74963	0.775423	0.691133	0.640459	0.64769	0.677188	0.0722602	0.0295001
	453.444	0.576444	0.712495	0.793035	0.637336	0.683267	0.644668	0.674541	0.0676474	0.0276169
	454.069	0.586504	0.73134	0.824411	0.693597	0.716874	0.652449	0.700862	0.0729428	0.0297788
	454.695	0.607056	0.73762	0.81161	0.743038	0.52324	0.620722	0.673881	0.0981488	0.0400691
	455.32	0.606688	0.808142	0.85309	0.738776	0.623359	0.641722	0.711963	0.0946515	0.0386413
	455.945	0.63797	0.779382	0.835286	0.722958	0.762984	0.710842	0.74157	0.0615014	0.0251078
	456.57	0.648376	0.802853	0.834708	0.706574	0.692463	0.690824	0.7293	0.066362	0.0270922
	457.195	0.626028	0.8077	0.875324	0.748058	0.688692	0.685612	0.738569	0.0831951	0.0339643
	457.82	0.641799	0.782907	0.84337	0.736408	0.768646	0.765534	0.756444	0.0605983	0.0247391
	458.446	0.654195	0.816408	0.897844	0.769464	0.799895	0.703289	0.773516	0.0787177	0.0321364
	459.071	0.670247	0.901365	0.903811	0.761792	0.839283	0.701324	0.796304	0.0917837	0.0374705
	459.696	0.705358	0.913596	0.862521	0.775999	0.673007	0.757452	0.781322	0.0838557	0.0342339
	460.321	0.699106	0.838996	0.911895	0.817294	0.593053	0.742495	0.76714	0.103421	0.0422213
	460.947	0.745294	0.912934	0.932009	0.769179	0.716876	0.769463	0.807626	0.0832831	0.0340002
	461.572	0.735255	0.892107	0.918631	0.761603	0.673005	0.833672	0.802379	0.0870353	0.035532
	462.197	0.748084	0.837673	0.933742	0.758287	0.842349	0.764099	0.814039	0.0653722	0.0266881
	462.822	0.782762	0.847149	0.960496	0.787649	0.861688	0.850895	0.84844	0.0588061	0.0240075
	463.447	0.80909	0.908416	0.980804	0.83709	0.821594	0.822341	0.863223	0.0617594	0.0252132
	464.072	0.784493	0.889904	0.973875	0.906232	0.814991	0.844248	0.868957	0.0625738	0.0255456
	464.698	0.769544	0.930123	0.964058	0.879996	0.72678	0.825816	0.849386	0.0842295	0.0343866
	465.323	0.819301	0.892109	0.964829	0.860484	0.906148	0.878771	0.88694	0.0443546	0.0181077
	465.948	0.840286	0.926267	0.962422	0.849403	0.865934	0.848857	0.882195	0.0458009	0.0186981
	466.573	0.820059	0.938279	0.951451	0.854801	0.914992	0.854824	0.889067	0.0484674	0.0197867
	467.199	0.83068	0.964944	1.0244	0.901022	0.775131	0.93535	0.905255	0.0828413	0.0338198
	467.824	0.817765	0.902466	0.991872	0.890036	0.921595	0.971837	0.915929	0.0568815	0.0232218
	468.449	0.848312	0.992713	1.00814	0.889468	0.994592	0.838885	0.928684	0.0716678	0.0292583
	469.074	0.868301	0.971005	1.00044	0.911442	0.925487	0.993744	0.945069	0.0474608	0.0193758
	469.699	0.886581	1.00461	0.997839	0.991569	0.722653	0.96043	0.927281	0.0997662	0.0407294
	470.325	0.880697	0.974751	0.98504	0.91182	0.963106	0.862982	0.929733	0.0472233	0.0192788
	470.95	0.903758	0.936515	0.999763	0.947906	0.882207	0.880734	0.925147	0.0418103	0.017069
	471.575	0.919832	0.969131	1.03672	0.937582	0.927491	0.887156	0.946319	0.0471269	0.0192395
	472.2	0.919983	0.944009	1.04326	0.882742	0.783505	0.902565	0.912678	0.0772139	0.0315225
	472.825	0.932704	0.963182	1.03518	0.949233	0.962634	0.906797	0.958289	0.0394616	0.0161101
	473.45	0.937506	1.0239	1.03932	0.926407	0.873009	0.913293	0.952238	0.0597165	0.0243791
	474.076	0.938372	1.03657	1.02613	0.966849	0.912634	0.920998	0.966926	0.0486966	0.0198803
	474.701	0.928312	0.991832	1.00852	0.942887	1.05709	0.950081	0.979788	0.0444236	0.0181358
	475.326	0.933072	1.01056	1.02613	1.00189	0.981619	0.934067	0.981225	0.0361652	0.0147644
	475.951	0.959226	1.00362	1.00592	0.956431	1.00072	0.946757	0.97878	0.0249756	0.0101962
	476.577	0.942071	1.00131	1.01353	0.950084	0.955795	0.951969	0.969126	0.0276095	0.0112715
	477.202	0.985749	0.983126	1.00814	1.03476	1.0854	0.969647	1.01114	0.0392256	0.0160138
	477.827	0.973613	0.971334	1.04596	0.864842	0.948718	0.902567	0.951172	0.0573238	0.0234023
	478.452	0.987501	0.990068	1.00477	0.980962	1.08245	0.93875	0.997416	0.0431069	0.0175983
	479.077	1.00576	1.0391	0.977917	1.04196	0.849071	0.970855	0.980777	0.064836	0.0264692
	479.702	1.00645	1.02654	1.03085	0.912483	0.903671	1.05199	0.988664	0.0585487	0.0239024
	480.328	0.982547	0.974862	1.00371	0.850729	1.09059	0.984452	0.981148	0.0701749	0.0286488
	480.953	0.97305	1.0164	0.99139	0.995643	1.0387	1.0115	1.00445	0.0208143	0.0084974
	481.578	0.995874	1.00208	1.00804	1.01449	1.10733	0.930668	1.00975	0.0517245	0.0211164
	482.203	1.00669	1.00671	0.983403	0.996968	1.0808	1.00636	1.01349	0.0312288	0.0127491
	482.829	0.996328	0.980592	1.02132	1.07729	1.02313	0.989816	1.01475	0.0320214	0.0130727
	483.454	1.01095	0.99139	0.95838	0.985698	0.974662	0.98702	0.984684	0.0159885	0.00652728
	484.079	0.997539	0.950951	1.022	1.03372	0.995889	0.917296	0.986231	0.0403153	0.0164587
	484.704	0.971406	1.03833	0.983307	0.97651	1.0394	1.00115	1.00168	0.0278518	0.0113704
	485.329	1.00472	1.07635	0.998128	0.992043	0.993413	1.0121	1.01279	0.0292292	0.0119328
	485.954	0.985381	1.00307	1.00207	1.00492	1.09035	1.00145	1.01454	0.0345154	0.0140908
	486.58	0.980687	0.978498	0.986483	0.987591	1.00131	1.01505	0.991603	0.0127612	0.00520976
	487.205	1.03936	0.972767	1.02161	1.02946	1.06889	1.00024	1.02205	0.0301459	0.012307
	487.83	0.997864	1.00373	1.02373	1.0214	0.876547	1.04919	0.995411	0.0556383	0.0227142
	488.455	0.987934	0.984228	1.02594	1.03571	1.06723	1.03869	1.02329	0.0291701	0.0119087
	489.08	0.993688	0.964283	1.01083	1.09926	0.933152	1.06619	1.01123	0.0568298	0.0232007
	489.706	0.991373	0.927479	0.982922	1.06971	0.999073	0.968665	0.98987	0.0425286	0.0173622
	490.331	0.995484	1.03293	0.948467	1.06943	0.955086	1.08704	1.01474	0.0530249	0.0216473
	490.956	1.01874	1.0683	0.968773	0.959178	0.880557	1.06898	0.994089	0.066425	0.0271179
	491.581	1.00241	0.955467	0.939997	0.965334	0.930205	0.922434	0.952641	0.0265251	0.0108288
	492.207	0.996609	0.991169	0.939034	1.00019	1.06747	1.01641	1.00181	0.0378774	0.0154634
	492.832	0.990681	0.943457	0.912953	1.03912	0.994828	0.978863	0.97665	0.0399861	0.0163243
	493.457	1.01699	0.954477	0.966945	1.02889	1.07785	0.920394	0.994257	0.052421	0.0214008
	494.082	1.0359	1.04461	0.925657	0.914472	0.969356	1.01225	0.983708	0.0510181	0.0208281
	494.707	0.983391	0.965055	0.924599	1.01534	0.927374	0.930592	0.957726	0.033633	0.0137306
	495.332	0.979973	0.946763	0.944136	0.953778	1.11712	0.946229	0.981333	0.0619266	0.0252814
	495.958	0.974673	0.974309	0.935377	0.875449	0.918647	0.949854	0.938052	0.0343942	0.0140414
	496.583	0.977117	0.857617	0.871088	0.92527	0.995419	0.952272	0.929797	0.0511985	0.0209017
	497.208	1.00993	0.911391	0.889181	0.988823	0.930323	0.99601	0.954277	0.0459771	0.0187701
	497.833	0.973483	0.918553	0.876382	0.948097	1.01853	0.96874	0.950631	0.0447379	0.0182642
	498.459	0.951287	0.924062	0.88206	0.846656	1.01252	0.9003	0.91948	0.0528521	0.0215768
	499.084	0.953256	0.94511	0.862042	0.964198	0.930086	1.00304	0.942955	0.0425914	0.0173879
	499.709	0.96033	0.89916	0.896978	0.862947	0.827372	1.00802	0.909135	0.0598126	0.0244184
	500.334	0.927642	0.848252	0.84799	0.877818	0.954143	0.879678	0.889254	0.0393502	0.0160646
	500.959	0.939302	0.839437	0.797751	0.929721	0.870534	0.940185	0.886155	0.0545949	0.0222883
	501.584	0.925197	0.894312	0.817962	0.923565	0.911219	0.983319	0.909262	0.0491697	0.0200734
	502.21	0.952585	0.802853	0.814209	0.91646	0.879849	0.941545	0.884583	0.058509	0.0238862
	502.835	0.914164	0.808033	0.843754	0.780261	0.860981	0.845608	0.842133	0.0419313	0.0171184
	503.46	0.904537	0.928029	0.800061	0.94033	0.875486	0.90944	0.89298	0.0462149	0.0188671
	504.085	0.908453	0.784782	0.806991	0.890035	0.753315	0.946002	0.848263	0.0703196	0.0287079
	504.711	0.881822	0.84164	0.750881	0.850729	0.831972	0.901584	0.843105	0.047624	0.0194424
	505.336	0.911482	0.878223	0.814209	0.904621	0.974544	0.85573	0.889801	0.0497997	0.0203306
	505.961	0.868626	0.734425	0.822871	0.966471	0.914992	0.796884	0.850711	0.0764287	0.0312019
	506.586	0.855148	0.839657	0.766088	0.800435	0.810273	0.787063	0.809778	0.0301758	0.0123192
	507.211	0.890129	0.788307	0.787743	0.81379	0.690224	0.908534	0.813121	0.0723392	0.0295324
	507.837	0.865597	0.763736	0.800831	0.778177	0.989284	0.788197	0.83097	0.0777902	0.0317577
	508.462	0.849956	0.798335	0.745395	0.834628	0.724657	0.827402	0.796729	0.0466233	0.0190339
	509.087	0.825077	0.798996	0.779947	0.854234	0.857326	0.784948	0.816755	0.0310961	0.0126949
	509.712	0.832173	0.750733	0.747321	0.856696	0.64777	0.843341	0.779672	0.0730582	0.0298259
	510.337	0.824342	0.727592	0.739524	0.786134	0.914638	0.774599	0.794472	0.0623014	0.0254344
	510.962	0.806754	0.74324	0.752518	0.79911	0.634917	0.752918	0.748243	0.0561528	0.0229243
	511.588	0.827673	0.660155	0.684088	0.757434	0.821593	0.789631	0.756763	0.0644548	0.0263136
	512.213	0.791892	0.654757	0.709401	0.845141	0.686804	0.744837	0.738805	0.0642841	0.0262439
	512.838	0.799507	0.706766	0.645304	0.718602	0.518641	0.788423	0.696207	0.094788	0.0386971
	513.463	0.72671	0.748638	0.68996	0.783387	0.694586	0.655169	0.716408	0.0419465	0.0171246
	514.088	0.80193	0.677125	0.666958	0.761696	0.688809	0.707897	0.717403	0.048617	0.0198478
	514.714	0.773871	0.729245	0.656853	0.716517	0.758149	0.769916	0.734092	0.0402963	0.0164509
	515.339	0.747651	0.696738	0.694003	0.793332	0.580317	0.712807	0.704141	0.065081	0.0265692
	515.964	0.765434	0.685499	0.615854	0.727221	0.623595	0.738642	0.692707	0.056753	0.0231693
	516.589	0.745704	0.659164	0.647228	0.767001	0.862987	0.695205	0.729548	0.0734615	0.0299905
	517.215	0.723205	0.618283	0.632022	0.630612	0.707442	0.714997	0.671094	0.0445695	0.0181954
	517.84	0.73108	0.621478	0.583708	0.724947	0.668643	0.748235	0.679682	0.0607051	0.0247828
	518.465	0.769545	0.665886	0.602764	0.705152	0.674068	0.697395	0.685802	0.0499186	0.0203792
	519.09	0.704536	0.629743	0.592273	0.642167	0.553546	0.613923	0.622698	0.0463873	0.0189376
	519.715	0.68684	0.600211	0.588905	0.700416	0.654727	0.661287	0.648731	0.0413332	0.0168742
	520.341	0.71611	0.571562	0.581784	0.633358	0.640459	0.627067	0.62839	0.0470256	0.0191981
	520.966	0.667759	0.562086	0.599011	0.628528	0.664752	0.643913	0.627675	0.0373483	0.0152474
	521.591	0.695125	0.588971	0.562439	0.58136	0.766523	0.675565	0.644997	0.0732805	0.0299166
	522.216	0.619755	0.585887	0.575527	0.6398	0.707559	0.616568	0.624183	0.0430251	0.0175649
	522.841	0.644135	0.54721	0.541746	0.596042	0.620292	0.639229	0.598109	0.0409738	0.0167275
	523.466	0.64353	0.608917	0.537994	0.628906	0.580315	0.611355	0.601836	0.0345225	0.0140937
	524.092	0.607597	0.610679	0.53376	0.66954	0.774777	0.588012	0.630727	0.0757418	0.0309215
	524.717	0.636001	0.579715	0.524039	0.644535	0.55626	0.582574	0.587187	0.0422156	0.0172344
	525.342	0.621117	0.568917	0.538956	0.612995	0.576425	0.602894	0.586884	0.0284	0.0115942
	525.967	0.5883	0.508753	0.507004	0.630138	0.605317	0.582422	0.570322	0.0466764	0.0190556
	526.592	0.603054	0.527595	0.511335	0.575488	0.474653	0.582574	0.545783	0.0448939	0.0183279
	527.218	0.588884	0.527595	0.460133	0.576056	0.54435	0.594509	0.548588	0.0461336	0.018834
	527.843	0.581896	0.535529	0.484386	0.605512	0.556141	0.560515	0.553997	0.0380043	0.0155152
	528.468	0.540576	0.503683	0.497861	0.623035	0.482555	0.508996	0.526118	0.0467166	0.019072
	529.093	0.573654	0.583573	0.474378	0.44658	0.461328	0.470848	0.501727	0.0551468	0.0225136
	529.718	0.565844	0.519331	0.448007	0.520743	0.461682	0.53672	0.508721	0.0412371	0.016835
	530.344	0.554292	0.51867	0.461	0.421575	0.492461	0.495776	0.490629	0.0418637	0.0170908
	530.969	0.509792	0.471948	0.448584	0.439383	0.377955	0.510055	0.459619	0.0454851	0.0185692
	531.594	0.516065	0.447597	0.427989	0.516764	0.35319	0.504011	0.460936	0.0589971	0.0240855
	532.219	0.48818	0.493655	0.44435	0.469123	0.465809	0.448185	0.468217	0.0183628	0.00749658
	532.845	0.511782	0.446274	0.412782	0.411726	0.531495	0.515115	0.471529	0.0496344	0.0202632
	533.47	0.495622	0.500378	0.405564	0.556639	0.499772	0.482179	0.490026	0.0444713	0.0181553
	534.095	0.479786	0.366165	0.387279	0.467418	0.323001	0.47402	0.416278	0.0606021	0.0247407
	534.72	0.485627	0.417956	0.427988	0.47348	0.382554	0.496154	0.447293	0.0407577	0.0166392
	535.345	0.467391	0.371234	0.384776	0.50625	0.398356	0.44048	0.428081	0.0479582	0.0195789
	535.971	0.487877	0.404622	0.379193	0.416745	0.410856	0.463974	0.427211	0.0370246	0.0151152
	536.596	0.414151	0.439002	0.373996	0.444023	0.431022	0.398253	0.416741	0.0245608	0.0100269
	537.221	0.460597	0.445172	0.363795	0.484657	0.329841	0.479459	0.427254	0.059118	0.0241348
	537.846	0.426546	0.404292	0.360619	0.437203	0.435265	0.432247	0.416029	0.0270802	0.0110554
	538.471	0.431219	0.405725	0.387086	0.402917	0.379605	0.459441	0.410999	0.0270986	0.0110629
	539.096	0.44169	0.38633	0.392283	0.436067	0.297766	0.385108	0.389874	0.0471587	0.0192525
	539.722	0.398921	0.429526	0.359945	0.410873	0.321232	0.405052	0.387591	0.0362898	0.0148152
	540.347	0.436714	0.32859	0.31221	0.408032	0.366634	0.34326	0.365907	0.0439269	0.0179331
	540.972	0.380857	0.335643	0.351766	0.455579	0.368284	0.38322	0.379225	0.037907	0.0154755
	541.597	0.409932	0.366276	0.337136	0.395623	0.366397	0.418196	0.38226	0.0282225	0.0115218
	542.222	0.368547	0.343575	0.326742	0.32705	0.389039	0.38813	0.357181	0.0262091	0.0106998
	542.848	0.382111	0.308204	0.34166	0.422145	0.321232	0.378008	0.358893	0.0391366	0.0159775
	543.473	0.376465	0.312942	0.281989	0.396761	0.321585	0.319615	0.334893	0.0392578	0.0160269
	544.098	0.369434	0.3222	0.328956	0.408789	0.30142	0.363127	0.348988	0.0355332	0.0145064
	544.723	0.347779	0.371785	0.311441	0.347888	0.280784	0.332154	0.331972	0.0292404	0.0119373
	545.348	0.374301	0.363851	0.321737	0.345709	0.320407	0.317122	0.340521	0.0224248	0.00915487
	545.974	0.332181	0.349968	0.3022	0.313316	0.322412	0.349453	0.328255	0.0176656	0.00721194
	546.599	0.334777	0.362528	0.28122	0.316632	0.211325	0.298085	0.300761	0.0476307	0.0194451
	547.224	0.317341	0.310078	0.283818	0.296079	0.3197	0.339558	0.311096	0.0177658	0.00725286
	547.849	0.327617	0.302475	0.270056	0.329324	0.302363	0.290985	0.303803	0.0205158	0.00837556
	548.475	0.356346	0.295313	0.296714	0.348456	0.252715	0.322485	0.312005	0.0351956	0.0143685
	549.1	0.321105	0.310518	0.281508	0.332638	0.25814	0.295441	0.299892	0.0249538	0.0101874
	549.725	0.312516	0.320656	0.305281	0.275147	0.282551	0.295668	0.298637	0.0160259	0.00654253
	550.35	0.317687	0.252008	0.266783	0.299677	0.16545	0.29801	0.266603	0.0502242	0.0205039
	550.975	0.302089	0.267213	0.245226	0.358022	0.201419	0.308812	0.280463	0.0499199	0.0203797
	551.601	0.304599	0.332337	0.231751	0.336238	0.214979	0.233422	0.275554	0.050189	0.0204896
	552.226	0.291965	0.223028	0.250615	0.271737	0.184438	0.279124	0.250151	0.0367604	0.0150074
	552.851	0.289131	0.29961	0.24205	0.320041	0.220758	0.254725	0.271052	0.0345916	0.014122
	553.476	0.275026	0.275037	0.237333	0.279978	0.12795	0.263714	0.243173	0.0534119	0.0218053
	554.101	0.264945	0.251897	0.202589	0.27382	0.218282	0.231533	0.240511	0.0253277	0.01034
	554.726	0.265269	0.240768	0.205959	0.251847	0.167456	0.274894	0.234366	0.0370316	0.0151181
	555.352	0.265377	0.241319	0.219048	0.188388	0.207552	0.255329	0.229502	0.0270036	0.0110242
	555.977	0.260964	0.216526	0.197103	0.241807	0.230899	0.227907	0.229201	0.0198464	0.00810226
	556.602	0.260034	0.260601	0.211445	0.246069	0.241867	0.24634	0.244392	0.0163601	0.00667898
	557.227	0.247249	0.279555	0.195661	0.248058	0.226184	0.275197	0.245317	0.0286008	0.0116762
	557.852	0.24965	0.280105	0.218758	0.325819	0.187149	0.228663	0.248357	0.0447591	0.0182728
	558.478	0.227411	0.223137	0.176701	0.234703	0.250122	0.218692	0.221794	0.0225297	0.0091977
	559.103	0.226589	0.238563	0.204033	0.205816	0.210499	0.218238	0.21729	0.0122028	0.00498177
	559.728	0.246362	0.238674	0.190656	0.223527	0.189272	0.251174	0.223277	0.0250623	0.0102316
	560.353	0.218822	0.251786	0.205862	0.292574	0.125238	0.225264	0.219924	0.0508037	0.0207405
	560.978	0.209303	0.217957	0.180357	0.232714	0.146229	0.182205	0.194795	0.0286078	0.0116791
	561.604	0.23111	0.216415	0.154565	0.254119	0.181018	0.213403	0.208439	0.0325145	0.013274
	562.229	0.211727	0.194267	0.163226	0.212256	0.124884	0.186814	0.182195	0.0305156	0.0124579
	562.854	0.235956	0.220934	0.156682	0.184221	0.163565	0.172989	0.189058	0.0294257	0.012013
	563.479	0.204025	0.186774	0.162264	0.207237	0.102242	0.187418	0.174993	0.0356613	0.0145587
	564.105	0.19654	0.200108	0.156393	0.2294	0.0922179	0.220127	0.182464	0.0464668	0.01897
	564.73	0.200391	0.181044	0.145999	0.215855	0.0533039	0.196558	0.165525	0.0546617	0.0223156
	565.355	0.203462	0.173992	0.160629	0.170012	0.160262	0.131518	0.166646	0.0213375	0.00871098
	565.98	0.198811	0.198123	0.126462	0.199943	0.191395	0.15569	0.178404	0.0278443	0.0113674
	566.605	0.182024	0.192614	0.158222	0.231483	0.0882096	0.179259	0.171969	0.0434491	0.017738
	567.231	0.168395	0.172779	0.156394	0.198049	0.127479	0.166191	0.164881	0.0210058	0.00857559
	567.856	0.203484	0.166718	0.17901	0.130518	0.126418	0.224811	0.171826	0.0357202	0.0145827
	568.481	0.160369	0.205947	0.157837	0.193787	0.132314	0.171932	0.170364	0.0242279	0.00989098
	569.106	0.172786	0.175976	0.143978	0.164709	0.117927	0.176692	0.158678	0.0213536	0.00871756
	569.731	0.179384	0.170687	0.147828	0.127013	0.100357	0.134766	0.143339	0.0266297	0.0108715
	570.356	0.162575	0.185341	0.129349	0.178916	0.133612	0.156672	0.157744	0.0209083	0.00853578
	570.982	0.163116	0.174212	0.140899	0.150219	0.086676	0.171327	0.147741	0.0296517	0.0121052
	571.607	0.156604	0.165067	0.135701	0.134022	0.10012	0.151082	0.140433	0.0210966	0.00861265
	572.232	0.162164	0.131238	0.143497	0.181378	0.0983507	0.173064	0.148282	0.0280142	0.0114367
	572.857	0.159136	0.172779	0.146865	0.143399	0.0884449	0.145266	0.142648	0.0262771	0.0107276
	573.482	0.146437	0.160328	0.149175	0.189335	0.081134	0.146625	0.145506	0.0324038	0.0132288
	574.108	0.149357	0.148978	0.145615	0.155048	0.154837	0.148589	0.150404	0.00342961	0.00140013
	574.733	0.14953	0.133001	0.13724	0.148987	0.164272	0.143151	0.14603	0.0100752	0.0041132
	575.358	0.150136	0.167712	0.124633	0.154479	0.108021	0.151838	0.142803	0.0201333	0.00821937
	575.983	0.132656	0.165617	0.143113	0.166699	0.120639	0.127741	0.142744	0.0178544	0.00728902
	576.609	0.139428	0.140385	0.107118	0.154575	0.109083	0.133255	0.13064	0.0171751	0.00701172
	577.234	0.129346	0.135976	0.0976863	0.159973	0.140569	0.140582	0.134022	0.0187321	0.00764734
	577.859	0.128719	0.129034	0.123382	0.179579	0.0956372	0.157579	0.135655	0.0266271	0.0108705
	578.484	0.128611	0.161541	0.125115	0.141029	0.108729	0.134463	0.133248	0.0160799	0.00656459
	579.109	0.128827	0.145343	0.131179	0.155806	0.0971726	0.0960884	0.125736	0.0224451	0.00916319
	579.735	0.127118	0.142697	0.130601	0.142925	0.104602	0.148665	0.132768	0.014631	0.0059731
	580.36	0.115609	0.139613	0.118184	0.130707	0.110144	0.146248	0.126751	0.013131	0.0053607
	580.985	0.133932	0.176305	0.131371	0.12654	0.128776	0.0815097	0.129739	0.0274647	0.0112124
	581.61	0.127702	0.148647	0.127522	0.146903	0.0742937	0.111725	0.122799	0.0250695	0.0102346
	582.235	0.134106	0.135975	0.108464	0.135821	0.119814	0.118449	0.125438	0.0105082	0.00428995
	582.861	0.119525	0.134433	0.123575	0.132791	0.0346704	0.142093	0.114514	0.0364545	0.0148825
	583.486	0.132765	0.125618	0.132237	0.181475	0.0504737	0.110291	0.122143	0.0387814	0.0158324
	584.111	0.111672	0.147766	0.1178	0.120382	0.0700483	0.122377	0.115008	0.0230817	0.00942307
	584.736	0.108924	0.123193	0.134353	0.200227	0.0678071	0.149873	0.13073	0.0402098	0.0164156
	585.361	0.130363	0.126831	0.118571	0.119625	0.0939868	0.148589	0.122994	0.0163119	0.00665929
	585.986	0.125452	0.143358	0.132332	0.166793	0.120166	0.143603	0.138618	0.015245	0.00622373
	586.612	0.127573	0.117023	0.141958	0.183179	0.115215	0.129175	0.135687	0.0229875	0.00938459
	587.237	0.11628	0.123965	0.147539	0.138852	0.0714634	0.108779	0.117813	0.0244825	0.00999494
	587.862	0.121666	0.126168	0.144845	0.162058	0.123704	0.0991863	0.129605	0.0196655	0.00802841
	588.487	0.124847	0.126499	0.147155	0.115079	0.131723	0.139373	0.130779	0.0103517	0.00422608
	589.112	0.108059	0.121651	0.148021	0.152964	0.0878558	0.0814338	0.116664	0.0272976	0.0111442
	589.738	0.122726	0.170907	0.155719	0.128906	0.0693408	0.138618	0.131036	0.0319799	0.0130557
	590.363	0.122337	0.141816	0.140513	0.122087	0.0837272	0.0804513	0.115155	0.0246493	0.010063
	590.988	0.104944	0.155039	0.173429	0.14823	0.0717005	0.124491	0.129639	0.0339156	0.013846
	591.613	0.133543	0.180163	0.175642	0.137147	0.127125	0.130611	0.147372	0.0218369	0.00891487
	592.238	0.125561	0.163084	0.187864	0.127013	0.108727	0.120337	0.138764	0.0275574	0.0112503
	592.864	0.106436	0.152614	0.178336	0.137147	0.0554249	0.141413	0.128562	0.0390158	0.0159282
	593.489	0.0965716	0.162312	0.195853	0.169255	0.0884449	0.145039	0.142913	0.038712	0.0158041
	594.114	0.112386	0.161431	0.182282	0.133643	0.0562509	0.121621	0.127936	0.0398505	0.0162689
	594.739	0.11416	0.163634	0.18363	0.13298	0.0880911	0.118524	0.133503	0.0318372	0.0129975
	595.365	0.106718	0.165617	0.181994	0.188578	0.0577846	0.122905	0.137266	0.0463575	0.0189254
	595.99	0.112991	0.154378	0.199318	0.139609	0.0800727	0.13892	0.137548	0.0365407	0.0149177
	596.615	0.117275	0.157573	0.199607	0.198428	0.0478787	0.132952	0.142286	0.0521164	0.0212764
	597.24	0.119546	0.163854	0.208365	0.172192	0.0733491	0.104473	0.140297	0.0454632	0.0185603
	597.865	0.1237	0.171457	0.187384	0.131559	0.0504737	0.122377	0.131158	0.0436428	0.0178171
	598.49	0.118529	0.192946	0.218182	0.148797	0.117925	0.149118	0.157583	0.0368997	0.0150643
	599.116	0.132656	0.171348	0.226842	0.166982	0.0599055	0.160298	0.153005	0.0501972	0.0204929
	599.741	0.116885	0.187766	0.211829	0.174939	0.0673348	0.160903	0.153276	0.0480548	0.0196183
	600.366	0.143646	0.190962	0.240606	0.116406	0.0603778	0.135672	0.147945	0.0566693	0.0231351
	600.991	0.121969	0.18446	0.232617	0.139136	0.0794819	0.144435	0.15035	0.0481661	0.0196637
	601.616	0.121926	0.181265	0.253116	0.171244	0.0849071	0.130914	0.157229	0.0534444	0.0218186
	602.242	0.12277	0.205506	0.238777	0.191702	0.0550711	0.140128	0.158992	0.0606446	0.0247581
	602.867	0.126361	0.175093	0.251866	0.156184	0.114152	0.165058	0.164786	0.0443538	0.0181074
	603.492	0.111174	0.203192	0.261778	0.14463	0.107903	0.156144	0.164137	0.0539612	0.0220296
	604.117	0.132808	0.210797	0.27506	0.160731	0.0899785	0.185755	0.175855	0.058619	0.0239311
	604.742	0.119006	0.200106	0.266303	0.151071	0.0499996	0.142773	0.154876	0.0669681	0.0273396
	605.368	0.115371	0.199447	0.273039	0.184031	0.0413922	0.178126	0.165234	0.0720358	0.0294085
	605.993	0.126967	0.255973	0.291711	0.177022	0.0750012	0.159015	0.180948	0.0736345	0.0300612
	606.618	0.119308	0.183688	0.279005	0.19947	0.0674534	0.146549	0.165912	0.0664242	0.0271176
	607.243	0.112602	0.197462	0.29479	0.167929	0.0762978	0.151536	0.166769	0.0691422	0.0282272
	607.869	0.115825	0.199666	0.294598	0.150028	0.109555	0.151611	0.170214	0.0628887	0.0256742
	608.494	0.120758	0.20198	0.271019	0.201743	0.047525	0.19059	0.172269	0.0707733	0.0288931
	609.119	0.115306	0.193936	0.270056	0.169539	0.102005	0.148892	0.166622	0.055642	0.0227157
	609.744	0.116972	0.219831	0.27044	0.158362	0.0510628	0.162716	0.163231	0.0700512	0.0285983
	610.369	0.117556	0.199666	0.283337	0.161867	0.0520056	0.147684	0.160353	0.0711855	0.0290614
	610.995	0.120758	0.227874	0.304029	0.164236	0.081723	0.162716	0.176889	0.0722638	0.0295016
	611.62	0.109076	0.200989	0.285743	0.168972	0.0800727	0.156294	0.166858	0.0661878	0.0270211
	612.245	0.105593	0.214101	0.299506	0.136674	0.103657	0.155389	0.169153	0.0690244	0.0281791
	612.87	0.112927	0.220823	0.289978	0.143588	0.0942221	0.100016	0.160259	0.0718836	0.0293463
	613.495	0.116236	0.186113	0.262164	0.178727	0.13361	0.138844	0.169282	0.0483257	0.0197289
	614.12	0.100487	0.217739	0.281412	0.147282	0.090449	0.142925	0.163382	0.066881	0.027304
	614.746	0.115696	0.23041	0.236851	0.155427	0.0829029	0.144283	0.160928	0.0563223	0.0229935
	615.371	0.0948411	0.219281	0.242338	0.154575	0.0326662	0.17367	0.152895	0.0714922	0.0291866
	615.996	0.098259	0.17906	0.239643	0.165751	0.10743	0.140582	0.155121	0.0475203	0.0194001
	616.621	0.113684	0.19085	0.250134	0.160637	0.036556	0.135218	0.147847	0.0660653	0.026971
	617.246	0.0821206	0.190191	0.24946	0.212729	0.0610871	0.162112	0.159616	0.0677587	0.0276624
	617.872	0.0947544	0.164406	0.233868	0.16452	0.100357	0.128269	0.147696	0.0472744	0.0192997
	618.497	0.0832239	0.17289	0.233965	0.156373	0.0216973	0.12993	0.133013	0.0673385	0.0274908
	619.122	0.0882858	0.172229	0.23127	0.120382	0.050709	0.180996	0.140645	0.0606619	0.0247651
	619.747	0.093889	0.188648	0.255426	0.104186	0.0550711	0.137409	0.139105	0.0662239	0.0270358
	620.372	0.0973722	0.192283	0.240412	0.141409	0.0469359	0.142093	0.143418	0.0622234	0.0254026
	620.998	0.089822	0.184571	0.225495	0.149176	0.00577899	0.138467	0.132218	0.0701811	0.0286513
	621.623	0.0916824	0.17884	0.229442	0.118963	0.068987	0.146625	0.13909	0.0538012	0.0219643
	622.248	0.080195	0.175535	0.214427	0.166698	0.0885616	0.121244	0.14111	0.0484455	0.0197778
	622.873	0.0863609	0.17289	0.226458	0.13298	0.0275948	0.111499	0.126297	0.0629866	0.0257142
	623.498	0.0921153	0.186774	0.204226	0.145387	0.081134	0.103567	0.135534	0.0470951	0.0192265
	624.124	0.0785943	0.16165	0.243108	0.113279	0.123941	0.119581	0.140026	0.0520568	0.0212521
	624.749	0.0797842	0.172229	0.243396	0.140083	0.0790113	0.127514	0.140336	0.0566132	0.0231122
	625.374	0.0755222	0.164626	0.193543	0.147944	0.0347889	0.105682	0.120351	0.0541978	0.0221262
	625.999	0.0763445	0.180493	0.212406	0.155806	0.0454023	0.125852	0.132717	0.0577565	0.023579
	626.625	0.0736401	0.164626	0.18719	0.126633	0.0958742	0.137636	0.130933	0.0384601	0.0157013
	627.25	0.0814064	0.135096	0.223089	0.136863	0.0283024	0.0988838	0.117273	0.0597756	0.0244033
	627.875	0.0729697	0.11559	0.203168	0.0985982	0.0489383	0.107118	0.10773	0.0481642	0.0196629
	628.5	0.0931968	0.14975	0.193543	0.126066	0.0538912	0.0939728	0.118403	0.0448728	0.0183192
	629.125	0.0687294	0.173111	0.190848	0.11631	0.0923364	0.103642	0.124163	0.0436109	0.0178041
	629.75	0.0834186	0.1384	0.197103	0.117542	0.0667476	0.112632	0.119307	0.0418628	0.0170904
	630.376	0.0599679	0.161761	0.187479	0.0911166	0.0622652	0.128269	0.115143	0.0482971	0.0197172
	631.001	0.0779884	0.159556	0.202781	0.122087	0.0126193	0.131971	0.117834	0.0603221	0.0246264
	631.626	0.0677128	0.130577	0.199221	0.119814	0.0649769	0.127966	0.118378	0.0450871	0.0184067
	632.251	0.0751114	0.150411	0.206825	0.122939	0.0470527	0.0959377	0.11638	0.0521355	0.0212842
	632.876	0.0736401	0.124406	0.212119	0.108069	0.0409217	0.0943513	0.108918	0.053184	0.0217123
	633.502	0.0517687	0.146775	0.170831	0.0680995	0.0805432	0.100923	0.103157	0.0425606	0.0173753
	634.127	0.0793082	0.112615	0.167366	0.0895993	0.0472879	0.0821884	0.0963941	0.0370843	0.0151396
	634.752	0.0638402	0.122423	0.18363	0.0655436	0.00389157	0.105455	0.0907972	0.0559017	0.0228218
	635.377	0.0637103	0.118345	0.191137	0.103049	0.0416275	0.103794	0.10361	0.0471032	0.0192298
	636.003	0.0591242	0.146335	0.193447	0.119057	0.0311326	0.0821895	0.105214	0.0544825	0.0222424
	636.628	0.0588211	0.125949	0.165055	0.0955678	0.0495291	0.106966	0.100315	0.0391919	0.016
	637.253	0.0678422	0.107878	0.165921	0.074919	0.0297175	0.0741807	0.086743	0.0420765	0.0171777
	637.878	0.0611578	0.141485	0.16775	0.137526	0.0257074	0.0749365	0.101427	0.050602	0.0206582
	638.503	0.0571123	0.135426	0.160146	0.0914946	0.00353779	0.073954	0.0869452	0.0512268	0.0209132
	639.129	0.0554031	0.138289	0.153314	0.105513	0.0201654	0.103188	0.0959787	0.0458519	0.018719
	639.754	0.0657875	0.123744	0.178241	0.0985982	0.032783	0.0657208	0.0941457	0.0471618	0.0192537
	640.379	0.0619149	0.156361	0.156394	0.0761508	0.00825367	0.0796196	0.0897825	0.0525715	0.0214622
	641.004	0.0428774	0.10347	0.125693	0.125782	0.0162739	0.0818111	0.0826511	0.0410992	0.0167787
	641.629	0.0614174	0.1038	0.141091	0.076057	0.0297175	0.0772038	0.0815477	0.0345956	0.0141236
	642.255	0.0483939	0.122863	0.157451	0.0792763	0.0325477	0.0871741	0.087951	0.0423463	0.0172878
	642.88	0.0532182	0.113497	0.137531	0.108923	0.0431611	0.0744084	0.0884564	0.0340219	0.0138894
	643.505	0.0496705	0.0991721	0.148597	0.068763	0.0369116	0.0754656	0.0797634	0.0365061	0.0149035
	644.13	0.0522879	0.118896	0.123864	0.0838227	0.0479973	0.0586955	0.0809271	0.0308015	0.0125746
	644.755	0.0529586	0.121982	0.138492	0.0809812	0.0271225	0.0618682	0.0805674	0.0388133	0.0158455
	645.38	0.0435698	0.0927821	0.133584	0.0688568	0.00495291	0.0717637	0.0692515	0.0397757	0.0162384
	646.006	0.0498652	0.0990613	0.139071	0.0736886	0.0159201	0.0567318	0.0723897	0.0389461	0.0158997
	646.631	0.0563335	0.120329	0.104519	0.0973664	0.0129713	0.0783369	0.0783093	0.0355147	0.0144988
	647.256	0.0501462	0.117464	0.142149	0.0672471	0.0937515	0.0701774	0.0901559	0.0315876	0.0128956
	647.881	0.0530453	0.100714	0.116934	0.07473	0.00790166	0.0809805	0.0723843	0.0351157	0.0143359
	648.506	0.0440456	0.108648	0.133585	0.0653533	0.0200469	0.0697241	0.0735672	0.0379715	0.0155018
	649.132	0.0473123	0.103359	0.149656	0.0537033	-0.0025932	0.0849838	0.0727368	0.0477624	0.0194989
	649.757	0.0426609	0.105784	0.114816	0.0981237	0.0209897	0.06625	0.0747707	0.0344162	0.0140504
	650.382	0.0464686	0.0769129	0.13214	0.0630801	0.0603778	0.0620948	0.0735124	0.0276642	0.0112939
	651.007	0.0369932	0.0958663	0.148599	0.103997	0.0343166	0.0382235	0.0763326	0.0430785	0.0175867
	651.632	0.042034	0.0917904	0.135124	0.072741	0.0252369	0.0410948	0.0680035	0.03724	0.0152032
	652.258	0.0441971	0.0798881	0.11395	0.0791812	0.0450485	0.0411696	0.0672391	0.0264182	0.0107852
	652.883	0.0402817	0.0986217	0.0939328	0.0927249	0.0106134	0.0839266	0.0700168	0.0329452	0.0134498
	653.508	0.0453436	0.102808	0.117608	0.0640263	0.0262982	0.05658	0.0687775	0.0318003	0.0129824
	654.133	0.048048	0.0953159	0.1178	0.0643119	0.0194579	0.0422279	0.064527	0.0331313	0.0135258
	654.759	0.0324719	0.0840764	0.109235	0.0307814	-0.0106134	0.063152	0.0515173	0.0391147	0.0159685
	655.384	0.0317145	0.0731659	0.118089	0.0621325	-0.00672181	0.0625481	0.0568214	0.0381881	0.0155902
	656.009	0.0390051	0.0905772	0.120688	0.0791812	0.0284209	0.0389792	0.0661419	0.0332652	0.0135805
	656.634	0.0353058	0.089035	0.102306	0.0501984	0.0071941	0.0507637	0.0558005	0.0319026	0.0130242
	657.259	0.0428559	0.0927804	0.111448	0.0895055	-0.0189856	0.0644359	0.0636734	0.0429407	0.0175305
	657.885	0.0344403	0.0780154	0.102593	0.0527571	0.000472296	0.0478176	0.0526826	0.0321849	0.0131394
	658.51	0.0335969	0.08584	0.115491	0.0405389	0.00436387	0.0504611	0.0550486	0.0361986	0.014778
	659.135	0.0369718	0.0878218	0.0763205	0.0821178	0.0108486	0.0597538	0.0589724	0.0272931	0.0111424
	659.76	0.0338562	0.0830847	0.095183	0.0608069	-0.00247646	0.0733501	0.0573008	0.0328956	0.0134296
	660.385	0.0323635	0.0883722	0.0885423	0.0628911	0.00212268	0.0482708	0.0537604	0.0306745	0.0125228
	661.01	0.0422936	0.0804401	0.102979	0.0561654	0.0222881	0.0629254	0.0611819	0.02587	0.0105614
	661.636	0.0289887	0.0590619	0.107022	0.113942	0.0195764	0.0793941	0.0679976	0.0358465	0.0146343
	662.261	0.0261334	0.0921193	0.0894099	0.0505777	-0.000824306	0.0392059	0.049437	0.0331533	0.0135348
	662.886	0.042142	0.0914598	0.105674	0.0743507	0.0109672	0.0435876	0.0613635	0.0323087	0.01319
	663.511	0.0266958	0.0783459	0.115876	0.0607118	0.0461081	0.043965	0.0619504	0.028855	0.01178
	664.136	0.038248	0.0597247	0.10375	0.0661119	-0.0123823	0.054691	0.0516905	0.0348274	0.0142182
	664.762	0.0355219	0.0952052	0.0928747	0.0730252	0.0212268	0.0460805	0.0606557	0.0282357	0.0115272
	665.387	0.038789	0.0591727	0.0917198	0.0688582	0.0103781	0.0427559	0.0519456	0.0255136	0.0104159
	666.012	0.0335752	0.0623677	0.092007	0.0792763	0.0134436	0.0277988	0.0514114	0.0284656	0.011621
	666.637	0.0357383	0.0695295	0.110198	0.0570193	0.0141512	0.0302916	0.0528214	0.0313148	0.0127842
	667.263	0.0308059	0.0749295	0.0831532	0.0386437	0.0459913	0.0493291	0.0538088	0.0189186	0.00772347
	667.888	0.0327746	0.0759212	0.109813	0.0680057	-0.017926	0.0598286	0.0547362	0.0396786	0.0161987
	668.513	0.0302867	0.08584	0.094799	0.0582496	0.0102596	0.0465337	0.0543281	0.0295157	0.0120497
	669.138	0.033337	0.0902466	0.0837307	0.084864	0.0127361	0.0337669	0.0564469	0.0306959	0.0125316
	669.763	0.0328396	0.0684287	0.106732	0.0826861	0.00306727	0.018054	0.0519679	0.03679	0.0150194
	670.389	0.0294433	0.0544339	0.0877729	0.0560717	-0.015683	0.0458539	0.0429821	0.0314691	0.0128472
	671.014	0.0285996	0.0689791	0.0744914	0.0546495	0.0137974	0.0549947	0.049252	0.0214936	0.00877473
	671.639	0.0293349	0.0664453	0.0878696	0.0754887	0.0275948	0.00551375	0.0487078	0.0295868	0.0120788
	672.264	0.0293567	0.0731659	0.0748769	0.0702789	-0.011558	0.0369396	0.04551	0.0311766	0.0127278
	672.889	0.0258738	0.0737179	0.0775707	0.0421472	-0.0192226	0.0510651	0.0418587	0.0325618	0.0132933
	673.514	0.0276261	0.0452886	0.0740107	0.0543668	0.0160368	0.0112553	0.0380974	0.0220718	0.00901078
	674.14	0.024446	0.0711841	0.0720849	0.041201	-0.0260629	0.0176766	0.0334216	0.0337842	0.0137924
	674.765	0.0233424	0.066004	0.0921038	0.0644071	-0.0071941	0.0395084	0.0463619	0.0322719	0.013175
	675.39	0.0306764	0.0672155	0.0873874	0.0429996	-0.0255906	0.0413214	0.0406683	0.0350794	0.0143211
	676.015	0.0260468	0.069199	0.0797838	0.062796	-0.0227604	0.0365612	0.0419377	0.0343459	0.0140217
	676.64	0.0234722	0.0675461	0.0819983	0.0312559	-0.00837219	0.0260617	0.0369937	0.0298669	0.0121931
	677.266	0.0272581	0.0644619	0.0670813	0.0659215	0.00165038	0.0476669	0.0456733	0.0241606	0.00986353
	677.891	0.0276044	0.0776848	0.0670813	0.0440424	0.0209915	0.0329363	0.0450568	0.0207418	0.00846779
	678.516	0.0169172	0.0453993	0.0894085	0.0195108	0.00165038	0.0419253	0.0358019	0.0282596	0.0115369
	679.141	0.0223474	0.0524521	0.0748755	0.0591021	0.0262964	0.0315755	0.0444415	0.0190974	0.00779646
	679.766	0.0207249	0.0541033	0.0732413	0.027562	0.0175705	0.0259869	0.0365315	0.0202377	0.008262
	680.392	0.017588	0.0599429	0.0708347	0.0501046	0.00695884	0.0243994	0.0383048	0.0233479	0.00953175
	681.017	0.0241212	0.0711841	0.0793998	0.0465045	-0.00518818	0.0431344	0.0431926	0.0283133	0.0115589
	681.642	0.0224772	0.0532223	0.0704493	0.0464108	-0.00424535	0.0244753	0.0354649	0.0242398	0.00989585
	682.267	0.0159223	0.0570801	0.064002	0.0307828	0.0248813	0.0376195	0.0383813	0.0170833	0.00697424
	682.892	0.0160521	0.067437	0.067562	0.0602387	0.0220511	0.022889	0.042705	0.0226076	0.00922949
	683.518	0.0230396	0.0293103	0.0542806	0.0354229	0.03302	0.0238714	0.0331575	0.0104462	0.00426465
	684.143	0.0177827	0.0505778	0.0606326	0.0478301	-0.00141512	0.0384501	0.035643	0.0211984	0.0086542
	684.768	0.0146892	0.0545446	0.0570711	0.0291717	-0.0179242	0.0254578	0.0271684	0.0252971	0.0103275
	685.393	0.0194918	0.0273269	0.0664071	0.0346656	-0.00554372	0.0239473	0.0277158	0.0213444	0.00871381
	686.019	0.0170256	0.0295318	0.0490835	0.043001	0.0120285	0.0296877	0.0300597	0.0130691	0.00533545
	686.644	0.0210277	0.04672	0.0630391	0.0232999	0.00283024	0.0135226	0.0284066	0.0203756	0.00831832
	687.269	0.016939	0.0716254	0.0564937	0.0403485	0.00908152	0.0226624	0.0361917	0.0222623	0.00908856
	687.894	0.018064	0.0437448	0.0847889	0.0274668	0.0173352	0.03135	0.0371249	0.0230841	0.00942405
	688.519	0.0253111	0.0295301	0.0571679	0.0330545	0.0367931	0.017978	0.0333058	0.0122116	0.00498535
	689.144	0.0176529	0.03394	0.0565904	0.0499143	0.0140344	0.030065	0.0336995	0.0155155	0.00633418
	689.77	0.0157708	0.0522306	0.0485061	0.0306876	0.0113209	0.00966889	0.0280308	0.0172173	0.00702894
	690.395	0.0184534	0.0586206	0.0649635	0.0375071	-0.015331	0.0244006	0.0314357	0.0267867	0.0109356
	691.02	0.0150137	0.0372441	0.052837	0.0170487	0.00365631	0.0116337	0.0229056	0.016811	0.00686305
	691.645	0.0170039	0.0466109	0.0529322	0.0356133	0.0030655	0.0289319	0.0306929	0.0169605	0.00692408
	692.27	0.0178693	0.0393383	0.0497562	0.051146	-0.0292452	0.00891424	0.0229632	0.0280752	0.0114617
	692.896	0.0148622	0.0145452	0.0292567	0.0424327	-0.0108486	0.0211519	0.0185667	0.0162568	0.00663682
	693.521	0.0148836	0.0360325	0.0182865	0.0400644	-0.0140327	0.0183565	0.0189318	0.0175253	0.00715466
	694.146	0.0165278	0.0533314	0.0162654	0.036845	0.00424535	0.0206987	0.0246523	0.0160186	0.00653957
	694.771	0.0130232	0.0411002	0.0260821	0.0226378	-0.00778315	0.0555975	0.0251096	0.0200843	0.0081994
	695.396	0.0166362	0.0567479	0.0333003	0.0424327	0.0125008	0.0188857	0.0300839	0.0157544	0.00643172
	696.022	0.0120066	0.0328375	0.0280065	0.0492522	-0.00448062	0.0279506	0.0242621	0.0168425	0.00687591
	696.647	0.0196213	0.0482637	0.0377265	0.0413913	-0.00707559	0.0236448	0.027262	0.0182608	0.00745496
	697.272	0.0220875	0.027988	0.0541839	0.01525	-0.0103781	0.0104247	0.019926	0.0194668	0.00794731
	697.897	0.0108166	0.0336094	0.0384974	0.0320146	-0.00684033	0.0198669	0.0213274	0.0156306	0.00638118
	698.523	0.0194701	0.0521199	0.0465817	0.037034	0.0139159	0.00407922	0.0288668	0.0175474	0.00716372
	699.148	0.0194701	0.0515695	0.0225207	0.0426217	0.00495291	0.0141266	0.0258769	0.0161694	0.00660112
	699.773	0.00607889	0.0544356	0.0266581	0.0466949	-0.00919827	0.0126161	0.0228809	0.0223376	0.0091193
	700.398	0.0113793	0.0268872	0.042925	0.011272	-0.0181613	0.00906494	0.0138945	0.0185996	0.00759327
	Hv1-L200Anap
	Wavelenght (nm)	Cell_1	Cell_2	Cell_3	Cell_4	Cell_5	Cell_6	Cell_7	Cell_8	Cell_9	Cell_10	Average	S.D.	S.E.M.
	405.929	0.00434155	-0.00752219	-0.00495572	-0.013606	0.0103782	0.0109459	0.00778731	0.00436488	0.0249023	-0.0030375	0.00335987	0.0105299	0.00332985
	406.554	0.0118513	0.00186239	0.0251988	0.00185549	0.0128688	0.0011799	0.02842	0.000101509	0.0261389	0.0059937	0.0115471	0.0106905	0.00338063
	407.179	-0.00105605	-0.00119095	0.0413134	-0.0109279	0.0214469	-0.0150233	0.0196208	0.00307877	0.0225821	0.0291518	0.0108996	0.0175518	0.00555036
	407.805	0.00555425	0.00208584	0.0252012	-0.00618589	0.0232458	-0.00236142	0.0173967	0.00192867	0.0259858	-0.00164192	0.0091209	0.0118614	0.0037509
	408.43	0.00876113	-0.00104236	0.000413338	-0.0181427	-0.0101001	-0.026613	0.0349951	0.00392484	0.0171692	0.0194617	0.00288271	0.0174583	0.00552081
	409.055	0.00704035	0.00953429	-0.0235467	-0.00288745	-0.00913227	0.00107366	0.0625048	0.00964335	0.0338743	0.0105931	0.00986975	0.0225238	0.00712265
	409.68	0.000508666	-0.00744845	0.00578364	-0.0336038	0.00193708	0.00343347	0.0112266	0.00240221	0.0278419	-0.00320255	0.000887874	0.01464	0.00462958
	410.305	0.00219014	-0.0086394	-0.0475122	0.0131956	0.0154964	-0.00965815	0.0246788	0.00240221	0.0249023	0.0009854	0.00180411	0.020119	0.00636219
	410.93	0.00254274	-0.00886285	-0.00165273	-0.0010298	-0.000276666	0.00998009	0.0240719	-0.00091358	0.0218095	-0.00369525	0.00419734	0.0104015	0.00328924
	411.556	0.0157235	0.00610668	-0.00495758	0.00659843	0.0435852	-0.00171754	0.0231617	6.8011e-05	-0.00897205	0.00131428	0.00809106	0.0148973	0.00471094
	412.181	0.0057109	0.00752219	0.00908911	0.0043304	0.00608894	-0.0121258	0.0117318	-0.000846077	0.0323268	0.0033676	0.00671958	0.0105729	0.00334344
	412.806	-0.00133004	-0.00417167	0.0285061	-0.000205031	0.0229683	0.00472123	0.0255875	0.000270521	0.022429	0.00451683	0.0103293	0.0122187	0.00386388
	413.431	0.00406815	0.00826737	0.0578364	-0.0251511	0.01605	-0.00139399	0.0260943	0.00592152	0.0116008	-0.00648763	0.00968057	0.0206823	0.00654032
	414.057	0.000664727	-0.0102046	0.0396607	0.00123792	0.00719581	0.00729673	0.0366124	-0.0033838	-0.00804167	0.00353143	0.00745695	0.0163006	0.0051547
	414.682	0.00352018	0.0025316	-0.00289213	0.0129893	0.0438619	0.00246766	0.0197224	0.000778066	0.0429995	0.00377778	0.0129756	0.0164164	0.00519132
	415.307	0.013142	0.000149706	0.0776711	0.0107216	0.0107933	0.009766	0.00879922	0.00893279	0.023357	-0.00073905	0.0162594	0.0214289	0.00677643
	415.932	-0.00711838	0.00245787	-0.00702551	-0.000413465	0.00899383	-0.00171754	0.0135538	0.00653058	0.0151599	0.00500953	0.00354307	0.00738797	0.00233628
	416.557	0.00410687	-0.00350134	-0.0421394	-0.005153	0.00207614	0.00998009	0.016183	0.000338532	0.0259858	-0.00714415	7.32457e-05	0.0170985	0.00540701
	417.183	0.00864438	0.00290475	-0.0450334	-0.0276261	0.021862	0.0107318	0.0170933	0.00852675	0.0388232	0.00533717	0.00412639	0.0227988	0.0072096
	417.808	0.0123599	-0.00215957	0.0475122	0.00103072	0.042618	-0.00160969	0.0564364	0.0100494	0.0576954	-0.00229968	0.0221633	0.0243778	0.00770894
	418.433	0.0142761	0.00707642	0.00247693	0.017317	0.0244905	0.00289744	0.0232618	0.00203018	0.0315542	-0.0105105	0.011487	0.0122472	0.0038729
	419.058	0.00488894	-0.00543747	0.0512286	0.026184	0.00581207	-0.0108381	0.0299386	-0.00548148	0.0239742	-0.00714415	0.0113125	0.0194605	0.00615395
	419.683	0.0221771	0.0102784	0.0557728	0.042469	0.0449687	0.0283306	0.0569416	0.0100829	0.035111	-0.0053384	0.0300794	0.0197335	0.00624028
	420.308	0.00923049	0.0100549	0.0330503	0.0133997	0.0301641	0.0252174	0.01153	0.00693661	0.035575	0.00968895	0.0184848	0.010619	0.00335801
	420.934	0.0209257	0.00804393	0.0615546	-0.0105135	0.0405425	0.0436758	0.0402534	0.0127221	0.0258303	0.012235	0.025527	0.0200902	0.00635309
	421.559	0.0369619	0.00923488	0.0384213	0.00453667	0.0280894	0.0765135	0.0210362	0.000101509	0.00479345	0.0033676	0.0223056	0.0225677	0.00713653
	422.184	0.0438849	0.0364949	0.0822134	0.0523659	0.0356989	0.042388	0.0258925	0.0100829	0.0131483	0.00320255	0.0345372	0.022039	0.00696934
	422.809	0.0546015	0.0408162	0.00991702	0.0321618	0.0626812	0.0556953	0.0281166	0.00233471	0.0233547	0.0197893	0.0329468	0.0192068	0.00607374
	423.435	0.0573789	0.0592871	0.0710589	0.0340164	0.0650321	0.0857434	0.0414671	0.0124516	0.0493405	0.0326833	0.0508459	0.0202954	0.00641798
	424.06	0.073963	0.0523593	0.0933699	0.0490684	0.0614353	0.131245	0.00940607	0.017493	0.0607882	0.00952636	0.0558654	0.0364803	0.0115361
	424.685	0.0487345	0.0601798	0.0578382	0.0379355	0.0581138	0.100553	0.00566488	0.0141432	0.0331017	0.0187226	0.0434987	0.0265068	0.00838218
	425.31	0.0777959	0.0748532	0.0789104	0.0531916	0.0770701	0.120943	0.0659426	0.0250727	0.0304706	0.0275099	0.063176	0.0283348	0.00896025
	425.935	0.107091	0.0647983	0.128482	0.105144	0.0981028	0.125662	0.0519852	0.0268664	0.0600155	0.0350642	0.0803212	0.0351939	0.0111293
	426.56	0.126179	0.0839395	0.0846922	0.0496869	0.101976	0.151419	0.0381295	0.0370508	0.0907948	0.0484484	0.0812316	0.0365611	0.0115616
	427.186	0.108969	0.108518	0.173514	0.118958	0.12453	0.157856	0.0189123	0.040164	0.0484124	0.0483659	0.0948199	0.0500802	0.0158367
	427.811	0.152111	0.10822	0.187562	0.133801	0.101286	0.187796	0.0508732	0.0609394	0.0643473	0.0892612	0.11362	0.0477213	0.0150908
	428.436	0.200337	0.111647	0.244572	0.133389	0.131311	0.1981	0.0599773	0.0679775	0.0951265	0.0491049	0.129154	0.0629004	0.0198908
	429.061	0.177182	0.14345	0.216068	0.179775	0.161338	0.274399	0.103972	0.0780944	0.080897	0.113321	0.15285	0.0591316	0.018699
	429.687	0.190207	0.135704	0.162776	0.149675	0.142933	0.23877	0.0837443	0.0978886	0.133177	0.114964	0.144984	0.0427536	0.0135199
	430.312	0.210037	0.148441	0.227638	0.18225	0.183613	0.236411	0.123391	0.0844214	0.0736256	0.133275	0.16031	0.0541568	0.0171259
	430.937	0.27211	0.138013	0.281345	0.247398	0.165904	0.33149	0.0831375	0.0872977	0.114307	0.149698	0.18707	0.084213	0.0266305
	431.562	0.254391	0.164082	0.294974	0.214206	0.196621	0.273648	0.096488	0.117818	0.141838	0.176633	0.19307	0.0631055	0.0199557
	432.187	0.244183	0.189256	0.353643	0.228431	0.214608	0.28073	0.116412	0.152128	0.112451	0.165547	0.205739	0.071424	0.0225863
	432.812	0.349162	0.1973	0.311914	0.244717	0.224155	0.269998	0.145844	0.150098	0.14385	0.19979	0.223683	0.0672544	0.0212677
	433.438	0.363439	0.208248	0.301173	0.235854	0.234118	0.367654	0.152217	0.154361	0.212527	0.209398	0.243899	0.0727419	0.023003
	434.063	0.34529	0.209366	0.299523	0.292135	0.241313	0.26281	0.119043	0.181328	0.160555	0.258257	0.236962	0.0659037	0.0208406
	434.688	0.297299	0.224188	0.32348	0.28059	0.223326	0.315178	0.101139	0.193476	0.155606	0.203649	0.231793	0.0687723	0.0217477
	435.313	0.30164	0.232306	0.353643	0.285539	0.269124	0.347156	0.179827	0.188435	0.240213	0.249635	0.264752	0.056057	0.0177268
	435.938	0.316229	0.230965	0.383799	0.319969	0.253214	0.42571	0.207035	0.211816	0.242071	0.259982	0.285079	0.0704217	0.0222693
	436.564	0.338016	0.243627	0.398261	0.342028	0.261792	0.343186	0.181446	0.224707	0.221652	0.226396	0.278111	0.0677189	0.0214146
	437.189	0.341105	0.243776	0.42057	0.36182	0.283515	0.374844	0.130168	0.218075	0.202007	0.308101	0.288398	0.0854167	0.0270111
	437.814	0.35499	0.227241	0.361488	0.357284	0.274106	0.333744	0.163241	0.222778	0.196285	0.33635	0.282751	0.0713851	0.0225739
	438.439	0.373921	0.282655	0.344141	0.375015	0.291818	0.38611	0.221194	0.248088	0.214072	0.286095	0.302311	0.0610341	0.0193007
	439.065	0.434077	0.305446	0.413543	0.369242	0.312987	0.39609	0.226454	0.252385	0.278108	0.305639	0.329397	0.0668133	0.0211282
	439.69	0.363908	0.295614	0.445769	0.379138	0.326963	0.382247	0.201168	0.291297	0.259394	0.362627	0.330813	0.067102	0.0212195
	440.315	0.390466	0.280197	0.474278	0.382231	0.34495	0.404033	0.169107	0.316234	0.317245	0.359835	0.343857	0.0778417	0.0246157
	440.94	0.407167	0.329578	0.361079	0.365736	0.333052	0.546543	0.253964	0.252351	0.295899	0.318203	0.346357	0.0809541	0.0255999
	441.565	0.449801	0.314607	0.481714	0.405116	0.333742	0.421739	0.263775	0.304967	0.347713	0.305474	0.362865	0.0684145	0.0216346
	442.19	0.471586	0.36652	0.525502	0.437894	0.383971	0.558455	0.166578	0.317756	0.280739	0.325346	0.383435	0.112738	0.035651
	442.816	0.401027	0.333525	0.493693	0.402847	0.39241	0.491922	0.264584	0.3251	0.313685	0.443102	0.386189	0.0728437	0.0230352
	443.441	0.515315	0.346709	0.580039	0.43068	0.409707	0.532594	0.315862	0.367767	0.350963	0.3476	0.419723	0.0874908	0.027667
	444.066	0.52126	0.377469	0.580037	0.467172	0.41787	0.4916	0.248706	0.343811	0.2877	0.385291	0.412092	0.0991261	0.0313464
	444.691	0.504598	0.41322	0.417678	0.422019	0.421052	0.577557	0.2926	0.305474	0.353128	0.4353	0.414263	0.0810934	0.025644
	445.317	0.482968	0.379554	0.472625	0.496859	0.421191	0.547295	0.360061	0.349258	0.334878	0.450164	0.429485	0.0680705	0.0215258
	445.942	0.5477	0.427297	0.518478	0.507993	0.408324	0.589255	0.34843	0.400283	0.30889	0.490237	0.454689	0.0856397	0.0270817
	446.567	0.572224	0.432659	0.531701	0.499127	0.465883	0.576377	0.303422	0.388509	0.399067	0.425939	0.459491	0.0825168	0.0260941
	447.192	0.537296	0.418209	0.559793	0.516651	0.455922	0.544935	0.357329	0.408032	0.434642	0.472746	0.470556	0.0640728	0.0202616
	447.817	0.565223	0.428638	0.528809	0.591283	0.472802	0.581743	0.373512	0.408066	0.405719	0.423229	0.477902	0.0776411	0.0245523
	448.442	0.636331	0.471017	0.609781	0.563655	0.505872	0.637438	0.273686	0.407389	0.431085	0.4376	0.497385	0.110825	0.0350461
	449.068	0.670437	0.47407	0.59119	0.523249	0.500615	0.715239	0.325268	0.42874	0.444234	0.511341	0.518438	0.109706	0.034692
	449.693	0.605548	0.485391	0.520961	0.537474	0.500753	0.591401	0.324559	0.445083	0.445781	0.465273	0.492222	0.0767387	0.0242669
	450.318	0.580516	0.47839	0.617217	0.581594	0.558175	0.684547	0.338922	0.47672	0.47718	0.554288	0.534755	0.0909209	0.0287517
	450.943	0.65049	0.543263	0.643657	0.599528	0.554301	0.648278	0.379379	0.475265	0.435415	0.537618	0.546719	0.0888356	0.0280923
	451.568	0.624714	0.552425	0.723394	0.587366	0.560804	0.688732	0.402034	0.502063	0.418246	0.501815	0.556159	0.0999533	0.031608
	452.194	0.629016	0.564118	0.64407	0.629628	0.578515	0.705689	0.330123	0.513161	0.439749	0.483503	0.551757	0.106271	0.0336057
	452.819	0.610672	0.524346	0.68456	0.584273	0.595258	0.670062	0.375332	0.531501	0.419796	0.612509	0.560831	0.0951954	0.0301034
	453.444	0.669224	0.617297	0.664729	0.626125	0.557069	0.66652	0.476372	0.515191	0.487544	0.596496	0.587657	0.0705996	0.0223256
	454.069	0.781479	0.571863	0.737854	0.663028	0.560804	0.751942	0.406281	0.547742	0.413761	0.604462	0.603922	0.124954	0.0395138
	454.695	0.700046	0.592495	0.747354	0.644059	0.632895	0.804096	0.361779	0.525546	0.588392	0.51364	0.61103	0.120468	0.0380954
	455.32	0.725548	0.645152	0.758925	0.650039	0.637183	0.636364	0.405168	0.544189	0.525128	0.581057	0.610875	0.0970171	0.0306795
	455.945	0.713931	0.645078	0.662661	0.68385	0.635523	0.785959	0.55243	0.529606	0.600302	0.61957	0.642891	0.0714262	0.022587
	456.57	0.743539	0.630183	0.81883	0.737866	0.658077	0.81622	0.590963	0.638018	0.473932	0.671468	0.67791	0.10018	0.0316798
	457.195	0.722966	0.607317	0.838242	0.696427	0.657247	0.790145	0.437332	0.576097	0.628916	0.647244	0.660193	0.10702	0.0338426
	457.82	0.747059	0.614467	0.777925	0.747967	0.679385	0.810105	0.551417	0.603471	0.562251	0.738721	0.683277	0.0891762	0.0282
	458.446	0.756329	0.697439	0.782883	0.696222	0.674682	0.738205	0.526235	0.615212	0.593497	0.613904	0.669461	0.0767961	0.024285
	459.071	0.784686	0.663476	0.878729	0.687354	0.735563	0.853137	0.461909	0.607226	0.617935	0.654717	0.694473	0.11794	0.037296
	459.696	0.813395	0.676509	0.804366	0.753121	0.741097	0.890803	0.647703	0.682749	0.737038	0.706532	0.745331	0.0700835	0.0221623
	460.321	0.818715	0.692745	0.877903	0.786521	0.743174	0.83425	0.500342	0.652229	0.575863	0.705712	0.718745	0.112802	0.035671
	460.947	0.731962	0.747266	0.95351	0.781366	0.758255	0.830493	0.480518	0.711375	0.599218	0.741431	0.733539	0.119788	0.0378803
	461.572	0.923734	0.707866	0.837003	0.794768	0.757148	0.817401	0.590458	0.663868	0.688932	0.721395	0.750257	0.0914032	0.0289042
	462.197	0.849497	0.732593	0.939875	0.817032	0.771123	0.787999	0.583986	0.663902	0.662326	0.786103	0.759444	0.0978316	0.0309371
	462.822	0.844451	0.755236	0.849397	0.812497	0.787312	0.835216	0.61989	0.673106	0.670679	0.765902	0.761369	0.0771242	0.0243888
	463.447	0.829197	0.753448	0.836177	0.821569	0.820382	0.854854	0.601078	0.776476	0.630155	0.708584	0.763192	0.0848511	0.0268323
	464.072	0.870774	0.769015	0.916737	0.835175	0.806961	0.894667	0.581659	0.731642	0.75668	0.797106	0.796042	0.0916068	0.0289686
	464.698	0.8326	0.821226	0.885753	0.861771	0.806961	0.87696	0.603505	0.787709	0.676247	0.757691	0.791042	0.0858588	0.0271509
	465.323	0.895572	0.732668	0.774207	0.863832	0.832419	0.891985	0.764722	0.752756	0.705948	0.899178	0.811329	0.0698533	0.0220895
	465.948	0.930305	0.787783	0.946487	0.900119	0.79589	0.917202	0.547676	0.79874	0.771993	0.716058	0.811225	0.115154	0.0364148
	466.573	0.868467	0.832844	0.904343	0.857031	0.833528	1.00187	0.61817	0.819448	0.726518	0.937033	0.839925	0.101716	0.0321653
	467.199	0.912195	0.929669	0.910127	0.881769	0.82232	0.95959	0.683407	0.758509	0.775242	0.931696	0.856452	0.0869407	0.027493
	467.824	0.848832	0.837834	0.948137	0.848372	0.84764	1.00702	0.7094	0.802124	0.754824	0.886367	0.849055	0.0817787	0.0258607
	468.449	0.869444	0.844911	0.95144	0.90486	0.863	0.901749	0.725279	0.850239	0.765808	0.804169	0.84809	0.0642327	0.0203122
[truncated: 1,319 more rows]
