# Supplementary material for: Activation-pathway transitions in human voltage-gated proton channels revealed by a non-canonical fluorescent amino acid
Source: eLife. 2023 Jan 25;12:e85836. doi: 10.7554/eLife.85836 (PMC9925047; doi:10.7554/eLife.85836)
Supplement: Figure 2—source data 1. [file elife-85836-fig2-data1.xlsx]

## Sheet: Figure 2A
Figure 2A	Hv1-Q191Anap
Mean spectra of Anap with diff pHo	pHo=3
Note:	Wavelenght (nm)	Exp_1	Exp_2	Exp_3	Exp_4	Exp_5	Exp_6	Average	S.D.	S.E.M.
pHo= external pH	405.929	0.000467165	0.00266477	0.0092098	0.0104674	0.00144645	0.00073978	0.0041659	0.00408692	0.00166848
SD: Standard deviation	406.554	0.00152681	0.00182722	0.0103355	0.00885701	-0.000317037	-0.00582613	0.00273389	0.00547932	0.00223692
S.E.M.: Standard error	407.179	-0.00147912	0.0140087	0.00772602	0.000615755	0.000713311	-0.0135019	0.00134714	0.00846978	0.00345777
	407.805	-0.000701425	0.0114962	0.00967029	0.0239661	0.000713311	0.00134091	0.00774757	0.00858975	0.00350675
	408.43	-0.000179767	0.00837484	0.00777721	0.00227347	0.0011492	-0.00864674	0.00179137	0.00566652	0.00231335
	409.055	0.00470298	0.00692825	0.00440029	-0.0109885	-0.00247677	-0.00485511	-0.00038147	0.00631217	0.00257693
	409.68	-0.00148732	0.0102781	0.0141729	-0.00473635	0.000217976	-0.006381	0.00201072	0.00761208	0.00310762
	410.305	0.00228679	0.00875547	0.010489	-0.000473663	0.000534983	-0.0075832	0.00233489	0.0060168	0.00245635
	410.93	-0.00096156	0.00441571	0.00915861	0.00208406	-0.000911463	-0.00799935	0.000964334	0.00528973	0.00215952
	411.556	-0.000649676	0.0091361	0.0161683	0.000568368	0.000812402	-0.011791	0.00237409	0.00867466	0.00354141
	412.181	-0.00213425	0.0134757	0.012689	-0.00374171	-0.000772754	0.0169698	0.00608098	0.00844456	0.00344748
	412.806	-0.0011182	0.0130189	0.0138659	0.0017051	0.00200122	0.00850802	0.00633017	0.00580056	0.00236807
	413.431	0.00345948	0.0146938	0.0221035	-0.00213138	0.00529039	0.0182644	0.01028	0.00864568	0.00352958
	414.057	-0.0016766	0.00883153	0.0145822	0.00251034	0.0068359	0.0201603	0.00854061	0.00724872	0.00295928
	414.682	0.00216283	0.0121815	0.0125867	-0.000568368	0.0126216	0.0143342	0.00888641	0.00581348	0.00237334
	415.307	0.010392	0.00799409	0.0156055	-0.0017051	0.0207059	0.0279747	0.0134945	0.00946084	0.00386237
	415.932	0.0209843	0.0270277	0.0206197	0.00847812	0.0241733	0.0452219	0.0244175	0.0109542	0.00447204
	416.557	0.0212962	0.0406557	0.0332577	0.00582577	0.0206662	0.0429099	0.0274352	0.0129011	0.00526683
	417.183	0.0342079	0.0521518	0.0164241	0.0148723	0.0320198	0.0620991	0.0352959	0.0172613	0.0070469
	417.808	0.030017	0.0377626	0.0444116	0.0157722	0.0386773	0.120545	0.0478644	0.0337376	0.0137733
	418.433	0.042211	0.0570246	0.0390393	0.0227347	0.0573027	0.0832767	0.0502648	0.0188582	0.00769883
	419.058	0.049672	0.0576335	0.0778228	0.0678252	0.0553014	0.092432	0.0667812	0.0146581	0.00598415
	419.683	0.0697288	0.0717946	0.0653384	0.0648886	0.0741646	0.0871608	0.0721793	0.00746651	0.00304819
	420.308	0.0659969	0.0916656	0.0655431	0.069104	0.0904122	0.138625	0.0868911	0.0255613	0.0104353
	420.934	0.0841006	0.0978325	0.0942469	0.0835026	0.116904	0.146902	0.103915	0.0221973	0.009062
	421.559	0.102417	0.105065	0.116606	0.086534	0.128614	0.161005	0.116707	0.023644	0.00965262
	422.184	0.110768	0.120216	0.138198	0.123004	0.127306	0.204007	0.13725	0.0309587	0.0126389
	422.809	0.11769	0.112374	0.129909	0.119026	0.151975	0.191014	0.136998	0.0273691	0.0111734
	423.435	0.137082	0.155314	0.135947	0.143465	0.170541	0.206689	0.158173	0.0247321	0.0100969
	424.06	0.147042	0.154705	0.192945	0.165253	0.196141	0.27614	0.188704	0.0431277	0.0176068
	424.685	0.164765	0.195437	0.167414	0.168805	0.211536	0.252188	0.193357	0.0313297	0.0127903
	425.31	0.182879	0.188356	0.19315	0.202149	0.240346	0.27688	0.21396	0.0337868	0.0137934
	425.935	0.189328	0.173738	0.227277	0.184625	0.25057	0.349013	0.229092	0.0598167	0.02442
	426.56	0.209268	0.192239	0.166902	0.210201	0.278251	0.304762	0.226937	0.0484601	0.0197838
	427.186	0.220942	0.225662	0.220063	0.276416	0.281441	0.329084	0.258935	0.0404034	0.0164946
	427.811	0.240715	0.245076	0.249125	0.250034	0.292458	0.338887	0.269382	0.035498	0.014492
	428.436	0.255637	0.251928	0.248204	0.235873	0.319801	0.354793	0.277706	0.0437538	0.0178624
	429.061	0.278769	0.250025	0.271791	0.265996	0.317701	0.344528	0.288135	0.0325363	0.0132829
	429.687	0.297937	0.288777	0.289904	0.265996	0.31889	0.32631	0.297969	0.0200527	0.0081865
	430.312	0.329655	0.288168	0.318352	0.279447	0.320059	0.366584	0.317044	0.0284938	0.0116325
	430.937	0.328161	0.299207	0.340302	0.338321	0.361094	0.362792	0.338313	0.0214262	0.0087472
	431.562	0.336126	0.278347	0.36962	0.346941	0.374924	0.441537	0.357916	0.0488968	0.019962
	432.187	0.350156	0.357222	0.34593	0.313502	0.392559	0.368618	0.354664	0.0239033	0.00975848
	432.812	0.339569	0.304993	0.373304	0.340263	0.424361	0.330564	0.352176	0.0379719	0.015502
	433.438	0.347329	0.376788	0.422883	0.340642	0.39991	0.453144	0.390116	0.0399961	0.0163283
	434.063	0.397262	0.342984	0.371104	0.356319	0.458679	0.385403	0.385292	0.0373265	0.0152385
	434.688	0.395138	0.346487	0.436289	0.342347	0.453765	0.453652	0.404613	0.0468502	0.0191265
	435.313	0.394628	0.34367	0.418023	0.392742	0.463256	0.393495	0.400969	0.0356311	0.0145464
	435.938	0.419278	0.362246	0.43194	0.386869	0.461195	0.415089	0.41277	0.0315799	0.0128924
	436.564	0.412427	0.401227	0.451587	0.439017	0.485587	0.505579	0.449237	0.037116	0.0151525
	437.189	0.441182	0.453151	0.464634	0.48567	0.50867	0.473119	0.471071	0.0219353	0.00895506
	437.814	0.446378	0.40945	0.461564	0.387343	0.545188	0.515936	0.460976	0.0553814	0.0226093
	438.439	0.488642	0.462667	0.521582	0.426891	0.505183	0.551078	0.492674	0.0400982	0.01637
	439.065	0.491881	0.451932	0.48684	0.485149	0.543979	0.523011	0.497132	0.0293952	0.0120005
	439.69	0.489689	0.440512	0.504799	0.496943	0.544395	0.54146	0.502967	0.0349155	0.0142542
	440.315	0.498816	0.549537	0.518358	0.453794	0.58757	0.462993	0.511845	0.0467683	0.0190931
	440.94	0.497199	0.491446	0.503878	0.515888	0.565497	0.553621	0.521255	0.0282929	0.0115505
	441.565	0.542779	0.527001	0.63343	0.576183	0.584043	0.531889	0.565887	0.0369677	0.015092
	442.19	0.536143	0.548851	0.529308	0.562873	0.607147	0.641059	0.570897	0.040259	0.0164357
	442.816	0.521877	0.540781	0.61854	0.543975	0.644021	0.57392	0.573853	0.0439856	0.0179571
	443.441	0.574801	0.579762	0.591269	0.579498	0.64729	0.681334	0.608992	0.0406357	0.0165894
	444.066	0.60593	0.550983	0.575561	0.577082	0.650738	0.600646	0.59349	0.0313071	0.0127811
	444.691	0.609837	0.602983	0.588455	0.604696	0.656563	0.631765	0.615716	0.0223137	0.00910952
	445.317	0.607828	0.534995	0.595874	0.592286	0.671127	0.689287	0.615233	0.0516437	0.0210834
	445.942	0.64817	0.629706	0.639672	0.613458	0.706515	0.655763	0.648881	0.0290885	0.0118753
	446.567	0.611984	0.581513	0.660803	0.625915	0.701443	0.790551	0.662035	0.0687559	0.0280695
	447.192	0.637651	0.591334	0.664129	0.667879	0.715966	0.699275	0.662706	0.0406702	0.0166035
	447.817	0.690739	0.653764	0.660496	0.67631	0.726904	0.732474	0.690115	0.0303791	0.0124022
	448.442	0.685008	0.622016	0.730542	0.645287	0.760469	0.730625	0.695658	0.0495208	0.0202168
	449.068	0.689041	0.65917	0.649854	0.712212	0.754247	0.797718	0.710374	0.0521166	0.0212765
	449.693	0.672716	0.64775	0.725528	0.672237	0.786941	0.727434	0.705434	0.0466032	0.0190257
	450.318	0.719938	0.708809	0.737603	0.699613	0.821774	0.753051	0.740131	0.0405575	0.0165575
	450.943	0.71264	0.72769	0.694521	0.799504	0.794054	0.68605	0.735743	0.0451531	0.0184337
	451.568	0.740748	0.737588	0.760269	0.702881	0.810797	0.781118	0.755567	0.0342637	0.0139881
	452.194	0.720222	0.722057	0.790917	0.702976	0.858549	0.858753	0.775579	0.0648556	0.0264772
	452.819	0.73524	0.752586	0.795522	0.828206	0.838497	0.748195	0.783041	0.0402031	0.0164129
	453.444	0.763807	0.793318	0.759501	0.779137	0.823657	0.827496	0.791153	0.0266956	0.0108984
	454.069	0.788983	0.768042	0.796034	0.753892	0.852902	0.955578	0.819238	0.0683945	0.027922
	454.695	0.81453	0.771087	0.816756	0.824559	0.892055	0.866383	0.830895	0.0389119	0.0158857
	455.32	0.79614	0.81791	0.832617	0.776674	0.847632	0.922517	0.832248	0.0465173	0.0189906
	455.945	0.809236	0.744745	0.859018	0.813476	0.904895	0.984894	0.85271	0.0767262	0.0313233
	456.57	0.817157	0.790653	0.844027	0.775727	0.953539	0.976571	0.859612	0.0778234	0.0317713
	457.195	0.813155	0.795298	0.823714	0.826785	0.945811	1.02304	0.871301	0.0836464	0.0341485
	457.82	0.83638	0.794765	0.945642	0.856861	0.92677	0.854083	0.869083	0.051891	0.0211844
	458.446	0.840903	0.780908	0.86086	0.886795	0.967527	0.951509	0.881417	0.0639307	0.0260996
	459.071	0.861538	0.81121	0.882964	0.883148	1.00244	0.914425	0.892621	0.0581845	0.0237537
	459.696	0.903932	0.860316	0.892839	0.917961	0.950666	0.936065	0.910297	0.0294271	0.0120136
	460.321	0.877758	0.839303	0.87314	0.954763	0.933328	0.889641	0.894655	0.0386133	0.0157638
	460.947	0.881465	0.960889	0.937148	0.965514	0.94809	0.947532	0.940107	0.0278207	0.0113577
	461.572	0.888347	0.901124	0.877029	0.939748	0.954965	0.935325	0.91609	0.028753	0.0117384
	462.197	0.931684	0.908052	0.850832	0.90162	0.96509	1.026	0.930547	0.054777	0.0223626
	462.822	0.920997	0.881253	0.887569	0.839289	0.975849	0.963439	0.911399	0.047663	0.0194583
	463.447	0.937808	0.943607	0.916068	0.955236	1.00872	0.999829	0.960212	0.033351	0.0136155
	464.072	0.930268	0.933405	0.967745	0.826406	0.988887	0.996962	0.940612	0.0569267	0.0232402
	464.698	0.904397	1.00299	1.0185	0.918292	0.977474	1.03987	0.976921	0.0501145	0.0204592
	465.323	0.905259	0.959443	0.945846	0.931933	1.04292	1.03525	0.970108	0.0514943	0.0210225
	465.948	0.92949	0.96462	0.97895	1.01094	1.03319	1.14363	1.01014	0.0681928	0.0278396
	466.573	0.957716	0.925563	0.934999	0.938469	0.983537	0.976987	0.952879	0.0216718	0.00884746
	467.199	0.974211	0.952286	1.01881	0.944437	1.00848	1.06017	0.993066	0.040387	0.0164879
	467.824	0.985839	0.941628	0.952907	0.909909	1.00827	1.03751	0.972677	0.0426972	0.0174311
	468.449	0.928418	0.991876	1.04086	0.999095	1.01865	1.08713	1.011	0.0484301	0.0197715
	469.074	0.964371	1.00863	1.07601	0.948369	0.989838	0.972224	0.99324	0.0416092	0.0169869
	469.699	0.991851	0.96127	1.02275	0.933307	1.03715	1.02434	0.995111	0.0373299	0.0152399
	470.325	0.975488	0.984872	1.01277	0.994833	0.994376	1.06489	1.00454	0.0292631	0.0119466
	470.95	0.949487	0.940029	0.992765	1.02197	1.02447	0.949382	0.979685	0.0350431	0.0143063
	471.575	1.01685	0.968884	1.04838	1.02339	1.03498	1.00843	1.01682	0.0249576	0.0101889
	472.2	0.990636	0.969417	0.978029	0.953436	1.03523	0.964965	0.981953	0.0264211	0.0107864
	472.825	0.984688	0.925715	1.0425	1.02742	1.03177	0.95715	0.994873	0.0428134	0.0174785
	473.45	1.01178	0.998119	1.04373	0.967409	0.990492	1.00589	1.0029	0.0230615	0.00941483
	474.076	1.00666	1.01007	0.995323	0.965798	1.03813	1.04861	1.01076	0.0272603	0.011129
	474.701	1.00089	1.00345	1.01379	0.939606	1.01498	0.882197	0.97582	0.0490652	0.0200308
	475.326	0.987048	1.04426	1.02039	1.00326	0.950467	0.886173	0.981934	0.0516473	0.0210849
	475.951	0.997783	1.05872	0.993737	0.895463	1.02285	1.01721	0.997628	0.0503406	0.0205515
	476.577	0.97821	1.03535	1.04091	1.03845	0.989145	1.02096	1.01717	0.0247145	0.0100896
	477.202	1.02326	0.966904	1.00407	0.969966	1.04605	1.05199	1.01037	0.0334979	0.0136755
	477.827	1.04088	1.05271	1.01252	1.02188	0.992612	1.03266	1.02554	0.0195417	0.00797785
	478.452	0.994963	1.00604	0.989695	1.05044	1.01839	0.945082	1.00077	0.0317875	0.0129772
	479.077	0.97804	1.05583	0.989593	1.07426	0.996694	1.05809	1.02542	0.0381471	0.0155735
	479.702	1.02132	0.908205	1.04454	0.994406	0.977316	0.97449	0.986713	0.042822	0.017482
	480.328	1.04101	1.0049	0.990974	1.01108	0.975295	0.982304	1.00093	0.0217116	0.00886373
	480.953	1.01741	0.98708	1.00852	1.03339	0.993524	0.978929	1.00314	0.0186377	0.00760883
	481.578	1.01593	1.024	0.974243	0.992322	0.99713	0.968201	0.995305	0.0201638	0.00823183
	482.203	0.991002	1.01502	0.964061	0.999237	0.989818	1.053	1.00202	0.0273474	0.0111645
	482.829	0.984903	1.08689	0.960736	1.03538	0.967072	0.970051	1.00084	0.0457315	0.0186698
	483.454	0.98529	1.07334	1.02459	1.02614	0.975909	1.04209	1.02123	0.0329942	0.0134698
	484.079	1.03393	1.07661	0.998854	0.95751	0.937251	1.00163	1.00097	0.0461201	0.0188284
	484.704	0.980714	1.01	1.05611	1.04229	0.917616	0.950076	0.9928	0.0489509	0.0199841
	485.329	0.964756	0.94886	0.907882	0.954242	0.926908	1.08519	0.964639	0.0570581	0.0232939
	485.954	0.966881	0.993246	0.959149	1.06072	0.934933	0.902588	0.969586	0.0494474	0.0201868
	486.58	0.982287	1.0374	0.983197	1.02046	0.945415	0.976293	0.990842	0.0301441	0.0123063
	487.205	0.967723	1.04517	0.948865	1.0862	0.922767	0.940088	0.985135	0.0596595	0.0243559
	487.83	0.934792	0.918178	0.976699	1.00719	0.904637	0.932597	0.945683	0.0353006	0.0144114
	488.455	0.927221	0.967056	1.02219	0.932502	0.900813	0.97486	0.954106	0.0392915	0.0160407
	489.08	0.94815	1.04471	0.944516	0.952442	0.914207	0.871654	0.945947	0.0521707	0.0212986
	489.706	0.950973	1.02142	0.894374	1.08217	0.881375	0.894589	0.95415	0.0745445	0.0304327
	490.331	0.934794	0.994312	0.903174	0.983891	0.835327	0.922008	0.928918	0.0529194	0.0216043
	490.956	0.942334	0.995683	0.921696	0.937948	0.864414	0.923766	0.930974	0.0385857	0.0157526
	491.581	0.940211	0.984339	0.856818	0.963383	0.834614	0.854453	0.905636	0.0588377	0.0240204
	492.207	0.922543	0.932567	0.942316	0.937096	0.845512	0.984431	0.927411	0.0414831	0.0169354
	492.832	0.950381	0.957387	0.930599	0.946	0.82861	0.888809	0.916964	0.0454218	0.0185434
	493.457	0.91336	0.983349	0.917961	1.00161	0.838497	0.924505	0.92988	0.0529121	0.0216013
	494.082	0.919752	0.955408	0.955363	0.952537	0.855894	0.920529	0.92658	0.0351496	0.0143498
	494.707	0.900928	0.971929	0.885625	0.894042	0.779966	0.944712	0.8962	0.0601906	0.0245727
	495.332	0.896749	0.943988	0.884448	0.896552	0.832355	0.839102	0.882199	0.0378207	0.0154402
	495.958	0.89018	0.876609	0.893402	0.827401	0.804457	0.859771	0.858637	0.0327593	0.0133739
	496.583	0.883447	0.91795	0.877898	0.844073	0.805091	0.885248	0.868951	0.0357158	0.0145809
	497.208	0.865282	0.954951	0.864084	0.97835	0.780481	0.819866	0.877169	0.0698	0.0284957
	497.833	0.867311	0.927543	0.855897	0.876944	0.781036	0.894589	0.86722	0.0447926	0.0182865
	498.459	0.832316	0.878665	0.854874	0.845589	0.793182	0.773904	0.829755	0.0359101	0.0146603
	499.084	0.868416	0.823467	0.866028	0.898589	0.708595	0.840119	0.834202	0.0609049	0.0248643
	499.709	0.841419	0.874325	0.832668	0.857572	0.7358	0.79425	0.822672	0.0459926	0.0187764
	500.334	0.803073	0.871812	0.790354	0.818781	0.727181	0.871608	0.813802	0.0498324	0.020344
	500.959	0.832659	0.839456	0.733305	0.874149	0.777886	0.873087	0.821757	0.0509254	0.0207902
	501.584	0.799986	0.895795	0.845664	0.833274	0.738317	0.82523	0.823044	0.0476517	0.0194537
	502.21	0.78367	0.833822	0.825147	0.862071	0.733542	0.778205	0.802743	0.0423132	0.0172743
	502.835	0.79305	0.884831	0.83277	0.813713	0.692209	0.770067	0.797773	0.0591492	0.0241476
	503.46	0.762308	0.776492	0.786722	0.824038	0.715748	0.888855	0.792361	0.0538065	0.0219664
	504.085	0.785348	0.818899	0.761548	0.771843	0.704395	0.746808	0.764807	0.0350751	0.0143193
	504.711	0.785915	0.832984	0.758529	0.757634	0.667204	0.743664	0.757655	0.0497512	0.0203108
	505.336	0.734726	0.860468	0.757148	0.778663	0.662924	0.671392	0.74422	0.0669207	0.0273203
	505.961	0.730903	0.788141	0.784521	0.740441	0.684462	0.698905	0.737895	0.0390073	0.0159247
	506.586	0.75146	0.792557	0.778279	0.725474	0.671167	0.780285	0.74987	0.0415257	0.0169528
	507.211	0.759486	0.773904	0.844385	0.801067	0.601777	0.758831	0.756575	0.07524	0.0307166
	507.837	0.72733	0.722285	0.718211	0.813429	0.59617	0.615027	0.698742	0.0735221	0.0300153
	508.462	0.717555	0.727158	0.687153	0.694071	0.612616	0.607166	0.674287	0.0474921	0.0193886
	509.087	0.68748	0.777711	0.787029	0.720548	0.625297	0.606288	0.700725	0.0689823	0.0281619
	509.712	0.718133	0.720458	0.72389	0.735373	0.628368	0.68864	0.702477	0.0360387	0.0147127
	510.337	0.673615	0.821792	0.644891	0.688767	0.597418	0.652342	0.679804	0.06957	0.0284018
	510.962	0.672951	0.726472	0.725476	0.657696	0.554263	0.63773	0.662431	0.0584802	0.0238745
	511.588	0.659293	0.686502	0.696159	0.704965	0.57485	0.617293	0.65651	0.0466076	0.0190275
	512.213	0.652944	0.705079	0.649393	0.741199	0.589572	0.696408	0.672432	0.0485557	0.0198228
	512.838	0.658799	0.668763	0.630974	0.738309	0.556165	0.710557	0.660594	0.0582934	0.0237982
	513.463	0.612223	0.745963	0.667608	0.673847	0.533577	0.57392	0.634523	0.0700238	0.0285871
	514.088	0.631333	0.697237	0.677125	0.67972	0.532487	0.652712	0.645102	0.0545765	0.0222808
	514.714	0.58626	0.750531	0.652821	0.640029	0.538986	0.666121	0.639125	0.0660189	0.0269521
	515.339	0.599029	0.696247	0.610763	0.655659	0.518379	0.690073	0.628358	0.0611394	0.02496
	515.964	0.593008	0.706373	0.628364	0.644292	0.502924	0.57614	0.608517	0.0628334	0.0256516
	516.589	0.608717	0.653383	0.61634	0.626104	0.502766	0.560742	0.594675	0.0494972	0.0202071
	517.215	0.578255	0.642572	0.639007	0.621226	0.512633	0.57688	0.595095	0.045241	0.0184696
	517.84	0.590547	0.573823	0.558063	0.553211	0.49807	0.584463	0.559696	0.0305703	0.0124803
	518.465	0.583772	0.654982	0.59173	0.613363	0.500705	0.609848	0.5924	0.0468033	0.0191074
	519.09	0.56684	0.583645	0.611377	0.641119	0.512039	0.529299	0.574053	0.0445039	0.0181686
	519.715	0.536631	0.608464	0.61061	0.59527	0.494681	0.529299	0.562493	0.0444822	0.0181598
	520.341	0.537259	0.572224	0.578478	0.538623	0.461532	0.584463	0.54543	0.0418043	0.0170665
	520.966	0.537957	0.594912	0.55837	0.6091	0.455429	0.514965	0.545122	0.0512402	0.0209187
	521.591	0.53045	0.556845	0.610661	0.545064	0.438746	0.494944	0.529452	0.0532423	0.0217361
	522.216	0.516652	0.6058	0.518461	0.538197	0.423667	0.531195	0.522328	0.0533527	0.0217812
	522.841	0.526469	0.561642	0.561184	0.531755	0.421587	0.537253	0.523315	0.0474817	0.0193843
	523.466	0.489654	0.535909	0.492008	0.546864	0.41915	0.509047	0.498772	0.0413646	0.016887
	524.092	0.518703	0.552506	0.542508	0.527871	0.408807	0.472749	0.503857	0.0494301	0.0201797
	524.717	0.489053	0.567961	0.578989	0.503289	0.40205	0.483245	0.504098	0.0588258	0.0240155
	525.342	0.483661	0.502257	0.537238	0.561831	0.390875	0.451756	0.487937	0.0560423	0.0228792
	525.967	0.478785	0.542532	0.517386	0.511862	0.40635	0.40524	0.477026	0.0536735	0.0219121
	526.592	0.456917	0.505607	0.454862	0.46753	0.367078	0.481118	0.455519	0.0430748	0.0175852
	527.218	0.466732	0.542989	0.526698	0.463172	0.380096	0.398628	0.463052	0.0598422	0.0244305
	527.843	0.472851	0.501877	0.437312	0.472124	0.354218	0.436914	0.445883	0.0467394	0.0190813
	528.468	0.437443	0.505683	0.516414	0.441243	0.38929	0.42896	0.453172	0.0443731	0.0181152
	529.093	0.448751	0.484061	0.507869	0.503432	0.377183	0.411297	0.455432	0.048285	0.0197123
	529.718	0.456664	0.438609	0.471337	0.535402	0.364621	0.405055	0.445281	0.0533839	0.0217939
	530.344	0.430854	0.444547	0.483463	0.428881	0.337059	0.375231	0.416673	0.0476862	0.0194678
	530.969	0.433147	0.479189	0.504134	0.432859	0.353901	0.412592	0.43597	0.047982	0.0195886
	531.594	0.427984	0.441502	0.434703	0.427649	0.328619	0.430671	0.415188	0.0390006	0.0159219
	532.219	0.408164	0.440436	0.428409	0.448489	0.316869	0.429515	0.411981	0.044311	0.0180899
	532.845	0.393527	0.400085	0.510888	0.45853	0.312926	0.356966	0.405487	0.0645718	0.0263613
	533.47	0.398662	0.42559	0.406357	0.433191	0.330144	0.334217	0.388027	0.0411214	0.0167877
	534.095	0.378481	0.441426	0.45215	0.399136	0.300938	0.39761	0.394957	0.0492712	0.0201149
	534.72	0.360031	0.434726	0.414134	0.439727	0.287306	0.37093	0.384476	0.0527263	0.0215254
	535.345	0.37851	0.394984	0.502036	0.398568	0.29757	0.300878	0.378758	0.0689325	0.0281416
	535.971	0.358902	0.381508	0.453583	0.403115	0.312133	0.357105	0.377724	0.0437704	0.0178692
	536.596	0.368263	0.387599	0.400831	0.448963	0.290912	0.395113	0.381947	0.0474827	0.0193847
	537.221	0.363995	0.393309	0.447954	0.435701	0.274427	0.264442	0.363305	0.0718572	0.0293356
	537.846	0.330167	0.36217	0.378472	0.3926	0.262399	0.40843	0.355706	0.048407	0.0197621
	538.471	0.356983	0.455054	0.464737	0.43447	0.256099	0.343788	0.385188	0.0739498	0.0301899
	539.096	0.329041	0.354709	0.350075	0.308103	0.263846	0.288717	0.315748	0.0325472	0.0132874
	539.722	0.340446	0.354481	0.382616	0.316391	0.25913	0.31179	0.327476	0.0386824	0.015792
	540.347	0.316931	0.318698	0.410859	0.26538	0.253959	0.241091	0.301153	0.0573101	0.0233968
	540.972	0.331513	0.374656	0.372229	0.317575	0.255464	0.338054	0.331582	0.0398739	0.0162784
	541.597	0.301107	0.332935	0.375555	0.3387	0.241575	0.315258	0.317522	0.0410212	0.0167468
	542.222	0.305741	0.343746	0.371564	0.264812	0.24744	0.363162	0.316077	0.0474472	0.0193703
	542.848	0.272913	0.371078	0.338307	0.337894	0.24952	0.261529	0.305207	0.0457435	0.0186747
	543.473	0.308167	0.333848	0.437517	0.280631	0.236007	0.213255	0.301571	0.0731475	0.0298624
	544.098	0.282428	0.336285	0.385123	0.259933	0.208089	0.250709	0.287094	0.0582446	0.0237783
	544.723	0.293426	0.319078	0.382309	0.31085	0.240465	0.255841	0.300328	0.0461762	0.0188514
	545.348	0.281755	0.303319	0.379034	0.301566	0.233391	0.388085	0.314525	0.054041	0.0220622
	545.974	0.27037	0.294487	0.363327	0.328232	0.225783	0.253252	0.289242	0.046034	0.0187933
	546.599	0.27768	0.333544	0.331041	0.288399	0.239395	0.225924	0.282664	0.0409846	0.0167319
	547.224	0.254862	0.351816	0.325976	0.310423	0.203373	0.294127	0.290096	0.0487997	0.0199224
	547.849	0.246366	0.301796	0.341428	0.273195	0.207514	0.241507	0.268634	0.0435638	0.0177848
	548.475	0.268074	0.309562	0.285094	0.257707	0.213023	0.253159	0.264436	0.0296988	0.0121245
	549.1	0.259396	0.292431	0.3534	0.258749	0.199707	0.221532	0.264203	0.0496427	0.0202666
	549.725	0.262702	0.297228	0.296044	0.211906	0.196656	0.297456	0.260332	0.0416737	0.0170132
	550.35	0.238276	0.24302	0.288113	0.240704	0.189959	0.229624	0.238283	0.0286402	0.0116923
	550.975	0.240785	0.246751	0.326385	0.256002	0.186234	0.192725	0.24148	0.0463272	0.018913
	551.601	0.239346	0.260912	0.304333	0.25425	0.178466	0.212931	0.241706	0.03933	0.0160564
	552.226	0.227152	0.252994	0.32439	0.232983	0.181696	0.198921	0.236356	0.0456653	0.0186428
	552.851	0.22383	0.264262	0.259051	0.241746	0.175237	0.189765	0.225649	0.0334118	0.0136403
	553.476	0.217748	0.263044	0.257772	0.254771	0.17169	0.207521	0.228758	0.0329721	0.0134608
	554.101	0.194842	0.252613	0.231882	0.249561	0.178308	0.208215	0.219237	0.0276442	0.0112857
	554.726	0.205001	0.274997	0.255623	0.215838	0.180785	0.18283	0.219179	0.0352405	0.0143869
	555.352	0.193329	0.24736	0.281257	0.239662	0.146724	0.227404	0.222623	0.0427821	0.0174657
	555.977	0.192582	0.292964	0.254344	0.201676	0.146823	0.173489	0.210313	0.0492373	0.020101
	556.602	0.208945	0.224367	0.278289	0.192961	0.179675	0.198782	0.213837	0.0319333	0.0130367
	557.227	0.19436	0.245761	0.221803	0.20556	0.164577	0.20766	0.20662	0.0247746	0.0101142
	557.852	0.200035	0.24972	0.259358	0.199923	0.143296	0.187823	0.206693	0.0389237	0.0158905
	558.478	0.194256	0.217972	0.229938	0.190782	0.164161	0.20877	0.20098	0.0211851	0.00864878
	559.103	0.196002	0.20404	0.227584	0.178467	0.123641	0.138394	0.178021	0.0364796	0.0148927
	559.728	0.172649	0.221398	0.244674	0.146876	0.143613	0.180934	0.185024	0.0370161	0.0151118
	560.353	0.174778	0.19833	0.22825	0.248519	0.148408	0.145468	0.190625	0.0385122	0.0157225
	560.978	0.202639	0.204192	0.265293	0.211006	0.148091	0.136914	0.194689	0.0426498	0.0174117
	561.604	0.16743	0.237843	0.233366	0.170463	0.133052	0.169282	0.185239	0.0378528	0.0154533
	562.229	0.166643	0.191934	0.20195	0.214701	0.131329	0.132984	0.173257	0.0324382	0.0132428
	562.854	0.160353	0.20777	0.242678	0.185809	0.122016	0.130163	0.174798	0.0424323	0.0173229
	563.479	0.163766	0.207237	0.231729	0.159759	0.11514	0.137608	0.169207	0.0395724	0.0161554
	564.105	0.145845	0.204268	0.277113	0.162127	0.147457	0.171778	0.184765	0.0456366	0.0186311
	564.73	0.155811	0.19064	0.197908	0.170937	0.130853	0.149769	0.165986	0.0232817	0.00950472
	565.355	0.146564	0.182189	0.209318	0.197034	0.113278	0.109494	0.159646	0.0391785	0.0159945
	565.98	0.143643	0.205486	0.222519	0.146876	0.118826	0.140197	0.162924	0.0375357	0.0153239
	566.605	0.141168	0.164069	0.184605	0.153222	0.103826	0.165259	0.152025	0.0252457	0.0103065
	567.231	0.146631	0.137727	0.211467	0.151044	0.107948	0.153098	0.151319	0.0308459	0.0125928
	567.856	0.13768	0.159044	0.197857	0.135603	0.105372	0.116985	0.14209	0.0301038	0.0122898
	568.481	0.137303	0.147776	0.182815	0.162648	0.0991304	0.141307	0.145163	0.0255794	0.0104427
	569.106	0.140053	0.146482	0.196169	0.14787	0.115616	0.127204	0.145566	0.0252697	0.0103163
	569.731	0.136457	0.176555	0.170177	0.167147	0.113476	0.18565	0.158244	0.0251227	0.0102563
	570.356	0.133429	0.147015	0.21203	0.165963	0.107789	0.14029	0.151086	0.0322878	0.0131814
	570.982	0.127375	0.165592	0.201388	0.135887	0.110088	0.115598	0.142655	0.031748	0.0129611
	571.607	0.136619	0.167495	0.171712	0.168047	0.112961	0.137238	0.149012	0.0216454	0.00883671
	572.232	0.139492	0.178002	0.152576	0.125514	0.0959007	0.135943	0.137905	0.0249908	0.0102024
	572.857	0.133425	0.134377	0.181587	0.0945858	0.0859144	0.1082	0.123015	0.0318126	0.0129874
	573.482	0.114269	0.148995	0.168284	0.132193	0.101964	0.0925245	0.126371	0.0264264	0.0107885
	574.108	0.132394	0.148386	0.137533	0.11211	0.0930475	0.104362	0.121305	0.0195353	0.00797527
	574.733	0.120361	0.136204	0.174065	0.125751	0.107631	0.0310727	0.115848	0.0431595	0.0176198
	575.358	0.109953	0.141077	0.163218	0.126935	0.0888073	0.115182	0.124195	0.023635	0.00964895
	575.983	0.115492	0.136965	0.179898	0.0994643	0.097684	0.121886	0.125232	0.0278537	0.0113712
	576.609	0.112239	0.143056	0.177391	0.11912	0.0959998	0.109032	0.12614	0.0269457	0.0110005
	577.234	0.117318	0.129504	0.14178	0.133756	0.0987936	0.167709	0.131477	0.0212002	0.00865494
	577.859	0.114233	0.119074	0.169409	0.110974	0.112782	0.118603	0.124179	0.0204373	0.00834349
	578.484	0.111605	0.125774	0.197755	0.128498	0.0744618	0.0930331	0.121854	0.0387345	0.0158133
	579.109	0.10829	0.141077	0.143468	0.0970014	0.104282	0.128776	0.120482	0.018183	0.00742317
	579.735	0.106448	0.13057	0.160864	0.102827	0.0858748	0.0789302	0.110919	0.0277389	0.0113244
	580.36	0.113322	0.114201	0.137891	0.0941121	0.0950091	0.106396	0.110155	0.0147003	0.00600139
	580.985	0.0992065	0.124555	0.152013	0.124615	0.0917398	0.126973	0.11985	0.0197753	0.00807322
	581.61	0.116731	0.106664	0.149148	0.060247	0.0817336	0.117124	0.105275	0.0282256	0.011523
	582.235	0.0954541	0.12151	0.138659	0.107611	0.096198	0.0873457	0.107796	0.0175388	0.0071602
	582.861	0.0808304	0.13057	0.123769	0.0811345	0.0863701	0.101495	0.100695	0.0200334	0.00817858
	583.486	0.107501	0.11816	0.205941	0.0906072	0.0790785	0.0964548	0.116291	0.0419441	0.0171236
	584.111	0.101553	0.169399	0.114355	0.0906072	0.0943949	0.0787915	0.108183	0.0294173	0.0120096
	584.736	0.0930175	0.122271	0.136561	0.0812766	0.093523	0.101772	0.104737	0.0188966	0.00771452
	585.361	0.101606	0.111841	0.140091	0.0920755	0.0905707	0.0821669	0.103059	0.0189899	0.00775261
	585.986	0.0845963	0.1225	0.119369	0.107564	0.0993484	0.111806	0.107531	0.0127504	0.00520535
	586.612	0.0864296	0.160719	0.119983	0.087055	0.087242	0.0902126	0.105274	0.027476	0.011217
	587.237	0.0880367	0.104837	0.113895	0.0917914	0.0852803	0.13733	0.103528	0.0180853	0.00738331
	587.862	0.0772334	0.110471	0.130319	0.120352	0.0875788	0.122025	0.107996	0.0192229	0.0078477
	588.487	0.0815808	0.100497	0.113229	0.0800924	0.0757101	0.101264	0.0920623	0.0136893	0.00558865
	589.112	0.0825628	0.109405	0.134412	0.099038	0.109731	0.098027	0.105529	0.0157732	0.00643937
	589.738	0.0879591	0.0982131	0.146027	0.0835026	0.0841509	0.0909986	0.0984751	0.0218214	0.00890856
	590.363	0.088606	0.101715	0.106527	0.0894705	0.0842698	0.0785141	0.091517	0.00969152	0.00395655
	590.988	0.0722988	0.0801693	0.143059	0.0927386	0.0980407	0.0854499	0.0952927	0.0229129	0.00935414
	591.613	0.0724255	0.1225	0.115788	0.104959	0.0821101	0.0896577	0.0979066	0.0179868	0.00734309
	592.238	0.0760103	0.10674	0.122695	0.064936	0.0856964	0.0648735	0.0868252	0.0214573	0.00875991
	592.864	0.0731569	0.103847	0.120699	0.0697671	0.102756	0.140474	0.101784	0.024848	0.0101442
	593.489	0.0751495	0.0921223	0.114764	0.0562684	0.0960593	0.0857736	0.0866895	0.0180968	0.00738797
	594.114	0.0696225	0.0796364	0.127914	0.0731773	0.105927	0.0925245	0.0914669	0.0203725	0.00831703
	594.739	0.0797939	0.0823011	0.0913816	0.088097	0.083497	0.118002	0.0905122	0.0128699	0.00525412
	595.365	0.066701	0.110318	0.123053	0.0688198	0.0892432	0.0909986	0.0915224	0.0203489	0.00830739
	595.99	0.0703199	0.0994313	0.123718	0.0648413	0.0800097	0.102466	0.0901311	0.0204175	0.00833541
	596.615	0.0678111	0.0787227	0.112053	0.0738405	0.102023	0.0915998	0.087675	0.0157144	0.00641538
	597.24	0.0681924	0.092427	0.0972657	0.0755455	0.0977236	0.0521577	0.080552	0.016829	0.0068704
	597.865	0.0653717	0.0855749	0.124179	0.0789083	0.0928295	0.0345869	0.0802417	0.0271558	0.0110863
	598.49	0.0748921	0.0782659	0.109187	0.061431	0.0879354	0.0610357	0.0787912	0.016531	0.00674877
	599.116	0.0681883	0.072632	0.0684595	0.0502531	0.0909274	0.0780979	0.0714264	0.0122055	0.00498288
	599.741	0.071976	0.0694344	0.0937353	0.0619994	0.0886289	0.0901201	0.0793157	0.0119914	0.00489546
	600.366	0.0692575	0.0915134	0.0893862	0.0625204	0.0981596	0.0794389	0.0817127	0.01261	0.00514803
	600.991	0.0632116	0.0996597	0.0865209	0.0719932	0.088411	0.0488285	0.0764375	0.0170355	0.0069547
	601.616	0.0586271	0.0915894	0.0796136	0.0901336	0.0801088	0.0956688	0.0826236	0.012235	0.00499494
	602.242	0.0601226	0.107806	0.072962	0.0742193	0.0810203	0.10057	0.0827834	0.0164769	0.00672665
	602.867	0.0663919	0.0804738	0.0844744	0.0812766	0.102063	0.069405	0.0806807	0.0115708	0.00472377
	603.492	0.0537893	0.101791	0.0858558	0.102117	0.0823082	0.0472102	0.0788453	0.0214391	0.00875247
	604.117	0.0566999	0.0783421	0.0944516	0.0795715	0.0910462	0.0588162	0.0764879	0.0144421	0.00589595
	604.742	0.0511484	0.088544	0.0718876	0.066878	0.0731541	0.104963	0.0760958	0.0169409	0.0069161
	605.368	0.0491218	0.0899144	0.122286	0.0782926	0.098437	0.0319975	0.0783415	0.0301949	0.012327
	605.993	0.0566182	0.0791033	0.070455	0.0762086	0.0906302	0.0814734	0.0757481	0.0104857	0.00428075
	606.618	0.0484149	0.070348	0.117425	0.0569315	0.088411	0.0753698	0.07615	0.0224604	0.00916941
	607.243	0.0584773	0.0716422	0.0988007	0.0726089	0.100993	0.0524814	0.0758339	0.0184165	0.00751852
	607.869	0.0453518	0.0928837	0.0750087	0.0736984	0.0834971	0.0504469	0.0701477	0.0170016	0.00694088
	608.494	0.0490019	0.0914372	0.118858	0.0502531	0.0794549	0.0706996	0.0766174	0.0241682	0.00986663
	609.119	0.0585563	0.072023	0.0839116	0.0577367	0.0918587	0.0827218	0.074468	0.0129024	0.0052674
	609.744	0.0389531	0.0789511	0.0950655	0.0808029	0.0662983	0.0425862	0.0671095	0.0204292	0.00834017
	610.369	0.0428293	0.0928076	0.0709155	0.0426276	0.076998	0.0727805	0.0664931	0.0182183	0.00743758
	610.995	0.0579774	0.0880872	0.0804322	0.0340073	0.0757299	0.056458	0.0654487	0.0181104	0.00739355
	611.62	0.0455669	0.089077	0.0719387	0.0485954	0.0842302	0.0543772	0.0656309	0.0171019	0.00698183
	612.245	0.0432734	0.0829101	0.0571519	0.0511531	0.0654463	0.0329685	0.0554839	0.0159636	0.00651713
	612.87	0.0542619	0.06814	0.0691758	0.0587313	0.0497336	0.0687114	0.061459	0.00767576	0.00313362
	613.495	0.0409566	0.0735456	0.081609	0.0444748	0.0677646	0.0736589	0.0636683	0.0153853	0.00628101
	614.12	0.0405003	0.0642573	0.0829905	0.0450431	0.0684382	0.0606658	0.0603159	0.0142693	0.00582543
	614.746	0.0418133	0.0542076	0.0873396	0.0408751	0.0607305	0.0610819	0.0576746	0.0155284	0.00633944
	615.371	0.0448547	0.0612881	0.0868279	0.0358072	0.0786822	0.0629315	0.0617319	0.0176809	0.00721821
	615.996	0.0456854	0.0736978	0.0873396	0.0272343	0.0637225	0.0522502	0.0583216	0.0194533	0.00794179
	616.621	0.0349229	0.0773524	0.112667	0.0393121	0.0646141	0.0510942	0.063327	0.0263499	0.0107573
	617.246	0.0448751	0.0695105	0.0810974	0.0519582	0.0636234	0.0313964	0.0570768	0.0163759	0.00668541
	617.872	0.0418582	0.0787227	0.0622173	0.0178562	0.0554203	0.0802249	0.0560499	0.0215912	0.00881457
	618.497	0.0411799	0.0748399	0.0761343	0.0353809	0.0725794	0.050077	0.0583652	0.0167407	0.00683436
	619.122	0.0311366	0.0783421	0.0721945	0.0234925	0.0798909	0.0490598	0.055686	0.0225636	0.00921157
	619.747	0.0410819	0.0750683	0.0832463	0.0247713	0.0608692	0.0739364	0.0598289	0.0206608	0.00843472
	620.372	0.0346138	0.0909803	0.070762	0.026808	0.0646339	0.0586312	0.0577382	0.021658	0.00884185
	620.998	0.0351913	0.0530656	0.113946	0.0261923	0.0685769	0.0572903	0.0590437	0.0282609	0.0115375
	621.623	0.0339641	0.0901428	0.0717341	0.0239188	0.0612655	0.0356966	0.052787	0.0234737	0.0095831
	622.248	0.0389041	0.0779613	0.0855999	0.0385543	0.0642971	0.0648735	0.0616984	0.0178318	0.00727979
	622.873	0.045631	0.0775808	0.0682549	0.0466061	0.0588482	0.0370838	0.0556675	0.0140056	0.00571777
	623.498	0.036763	0.0858794	0.100284	0.0440958	0.051081	0.006381	0.0540808	0.031171	0.0127255
	624.124	0.0245936	0.0727844	0.0828882	0.0430538	0.068042	0.0107275	0.0503482	0.0263363	0.0107518
	624.749	0.0352362	0.102096	0.0875442	0.0300761	0.0458501	0.0536836	0.059081	0.0266911	0.0108966
	625.374	0.0406038	0.0655515	0.0801764	0.0321601	0.0544098	0.0269112	0.0499688	0.0187597	0.00765861
	625.999	0.0288716	0.0871737	0.0946051	0.0416803	0.0452358	0.0395807	0.0561912	0.0251277	0.0102583
	626.625	0.034784	0.0941779	0.0976239	0.037086	0.053003	0.0148428	0.0552529	0.0308153	0.0125803
	627.25	0.028286	0.0973757	0.0858046	0.0424855	0.0559751	0.014704	0.0541052	0.0295375	0.0120586
	627.875	0.0345784	0.101106	0.115378	0.0321601	0.0429374	0.0306565	0.0594695	0.0349482	0.0142676
	628.5	0.0366908	0.0869452	0.136612	0.0418224	0.0528841	0.0489672	0.0673203	0.0349286	0.0142595
	629.125	0.0425569	0.0945587	0.0949632	0.0131672	0.0568668	0.0778205	0.0633222	0.0293697	0.0119901
	629.75	0.0403246	0.0795603	0.113229	0.029413	0.0441262	0.00739829	0.052342	0.0346547	0.0141477
	630.376	0.0344585	0.0952439	0.113383	0.0232084	0.0423628	0.0287608	0.0562362	0.0348803	0.0142398
	631.001	0.0232329	0.0831385	0.0838092	0.0399751	0.0428581	0.0425401	0.0525923	0.0228201	0.00931625
	631.626	0.0259937	0.0749921	0.0906654	0.0187088	0.0525869	0.0562268	0.0531956	0.0252254	0.0102982
	632.251	0.0257199	0.0724036	0.0798695	0.0344336	0.0478513	0.0356042	0.0493137	0.0201452	0.00822424
	632.876	0.0345007	0.070348	0.0719899	0.0131672	0.0396878	0.0203452	0.0416731	0.0225987	0.00922589
	633.502	0.0296493	0.0948631	0.0835533	0.0258607	0.0316235	0.011976	0.0462543	0.0311842	0.0127309
	634.127	0.031947	0.0935689	0.0719387	0.0250082	0.0443244	0.063209	0.0549993	0.0237585	0.00969935
	634.752	0.0265753	0.101791	0.0749064	0.0220242	0.0403417	0.0353729	0.0501686	0.028697	0.0117155
	635.377	0.0231921	0.0660083	0.0660547	0.0261449	0.0489807	0.0370376	0.0445697	0.0172911	0.00705905
	636.003	0.0229782	0.0605267	0.0925585	0.0298867	0.0342389	0.0682952	0.051414	0.0245896	0.0100387
	636.628	0.0244206	0.0476601	0.0773112	0.0282763	0.0366364	0.0608969	0.0458669	0.0185851	0.00758734
	637.253	0.0219567	0.0779613	0.0981867	0.0326337	0.0613646	0.0146116	0.0511191	0.030457	0.012434
	637.878	0.0265167	0.0529132	0.0799718	0.0183772	0.0364978	0.0149815	0.0382097	0.0224826	0.00917847
	638.503	0.0195338	0.0542836	0.101461	0.0341021	0.0307516	0.0270499	0.0445304	0.027584	0.0112611
	639.129	0.0182916	0.0439293	0.0739854	0.0151564	0.0640395	0.0583538	0.045626	0.0223	0.00910395
	639.754	0.0217647	0.0575574	0.0962936	0.0203665	0.0448792	0.0241368	0.0441664	0.0269769	0.0110133
	640.379	0.0203551	0.0484213	0.0935307	0.0395015	0.0305733	0.0335234	0.0443176	0.0235994	0.0096344
	641.004	0.0201998	0.0768956	0.0886188	0.00933068	0.0278984	0.030749	0.042282	0.0296044	0.0120859
	641.629	0.0206274	0.0613642	0.112308	0.016009	0.0390934	0.0233507	0.0454589	0.0335038	0.0136779
	642.255	0.0173954	0.0556542	0.0940934	0.0205559	0.0285721	0.0252466	0.0402529	0.027105	0.0110656
	642.88	0.0224566	0.0481929	0.0868279	0.0323969	0.0254613	0.0055025	0.0368064	0.0257093	0.0104958
	643.505	0.0286183	0.0491827	0.0623196	0.0269501	0.0365572	0.00314424	0.034462	0.0185675	0.00758016
	644.13	0.0219323	0.0468225	0.0966006	0.0202718	0.0347541	0.0379623	0.0430573	0.0256301	0.0104634
	644.755	0.019181	0.0628869	0.088056	0.00265243	0.0333077	-0.0232121	0.0304786	0.0368738	0.0150537
	645.38	0.0212894	0.0478885	0.0621661	0.00691511	0.0304544	0.0322287	0.0334904	0.0177742	0.00725627
	646.006	0.029825	0.0445385	0.0643151	0.017051	0.0267096	0.0129469	0.0325643	0.0174106	0.00710786
	646.631	0.0187043	0.0647141	0.0880048	0.0170983	0.0389943	0.0388871	0.0444005	0.0250975	0.010246
	647.256	0.0165374	0.0464419	0.0725527	0.0135461	0.038499	0.0496146	0.0395319	0.0201861	0.00824092
	647.881	0.0213575	0.0575574	0.0694828	0.0198929	0.0368742	0.0493834	0.0424247	0.0182203	0.00743842
	648.506	0.0206547	0.0415693	0.063343	0.0143986	0.0228854	0.0375	0.0333918	0.0164021	0.00669615
	649.132	0.0219717	0.0393614	0.0663106	0.0068678	0.0170799	0.0350955	0.0311145	0.0191097	0.00780151
	649.757	0.0224811	0.0500202	0.0788973	0.0191824	0.0269275	0.0196979	0.0362011	0.0217951	0.00889782
	650.382	0.0236265	0.0456805	0.0669757	0.0184246	0.032317	0.00527126	0.0320492	0.0199139	0.0081298
	651.007	0.0230995	0.0593085	0.0824788	0.0107043	0.0259566	-0.0122071	0.0315568	0.0311347	0.0127107
	651.632	0.0199492	0.0469748	0.0718876	0.0207454	0.0242526	0.044482	0.0380486	0.0186345	0.0076075
	652.258	0.0238472	0.0432441	0.0736784	0.042817	0.0311875	0.0563193	0.0451823	0.0163118	0.00665927
	652.883	0.0170672	0.0440817	0.0699434	0.00933075	0.0249659	0.0114673	0.029476	0.0214297	0.00874865
	653.508	0.0145938	0.0428635	0.0708643	0.023161	0.0326736	0.0270961	0.0352087	0.0181304	0.00740172
	654.133	0.0162799	0.0604505	0.0678455	0.027329	0.0222712	0.0370837	0.0385433	0.0192652	0.00786497
	654.759	0.0138134	0.0392852	0.0624219	-0.00454694	0.0269869	0.00120226	0.0231938	0.022925	0.0093591
	655.384	0.0181091	0.0306059	0.0655943	0.00483112	0.016426	0.00883165	0.0240663	0.020262	0.00827192
	656.009	0.0129648	0.0285503	0.0597614	0.00449955	0.0266699	0.018357	0.0251338	0.017478	0.00713536
	656.634	0.0167784	0.0432443	0.082223	0.0112726	0.0247083	0.00897037	0.0311995	0.0254617	0.0103947
	657.259	0.0109586	0.0447669	0.0755204	0.0115094	0.0243715	0.0280209	0.0325246	0.0223308	0.00911652
	657.885	0.0228979	0.0462134	0.0706085	0.00222615	0.0285523	-0.00910909	0.0268982	0.0264816	0.010811
	658.51	0.0100761	0.0372296	0.0692782	-0.00393126	0.0288891	-0.0095715	0.021995	0.0268514	0.0109621
	659.135	0.0166014	0.0292355	0.0697387	0.00563629	0.0199925	-0.00531752	0.0226478	0.0237206	0.00968391
	659.76	0.0205566	0.0412647	0.0793578	0.00928329	0.022925	0.0255703	0.0331596	0.0226981	0.00926646
	660.385	0.0150664	0.0396659	0.0487096	0.00776774	0.020369	0.00453141	0.022685	0.0162333	0.00662721
	661.01	0.0116205	0.0469748	0.083758	0.0113674	0.0341002	0.0204839	0.0347175	0.025288	0.0103238
	661.636	0.0151536	0.024363	0.0707108	0.00412066	0.0166439	-0.00582613	0.020861	0.0242901	0.00991641
	662.261	0.0147532	0.0255049	0.0674873	0.0251029	0.026016	0.0378699	0.032789	0.0168972	0.00689824
	662.886	0.0152993	0.0408079	0.063036	0.0120304	0.0241733	-0.00309798	0.0253748	0.021402	0.00873734
	663.511	0.0116383	0.0306821	0.104378	0.0171457	0.0169411	0.0087392	0.0315874	0.0332724	0.0135834
	664.136	0.0176692	0.0228403	0.0691758	0.00814662	0.0174365	0.0169235	0.0253653	0.0200648	0.00819142
	664.762	0.0134129	0.0238299	0.0628824	0.0105622	0.0197746	0.0135019	0.023994	0.0179471	0.00732689
	665.387	0.000152538	0.0378386	0.0622685	0.00700989	0.0193387	0.00596485	0.0220955	0.0217508	0.00887972
	666.012	0.0102041	0.0287027	0.0740365	0.00970956	0.0236185	0.00388409	0.0250259	0.0235188	0.00960149
	666.637	0.00781786	0.0408079	0.0823765	0.0233031	0.0197151	-0.00124846	0.0287953	0.0272963	0.0111437
	667.263	0.0210347	0.0172824	0.0670268	-0.00464164	0.0139096	-0.0111437	0.0172447	0.0251285	0.0102587
	667.888	0.0107312	0.0282459	0.0700968	0.0226399	0.022925	0.0334309	0.0313449	0.0186515	0.00761443
	668.513	0.01023	0.0313672	0.0580728	0.0226873	0.0161684	0.00642719	0.0241588	0.0172074	0.00702487
	669.138	0.0127224	0.0409602	0.0540308	0.0180457	0.0191603	-0.00476265	0.0233595	0.0191502	0.00781805
	669.763	0.00936373	0.0254289	0.0614499	-0.00530472	0.0252829	-0.00134098	0.0191466	0.022286	0.00909823
	670.389	0.015633	0.0495634	0.0439	0.0195613	0.0174959	-0.0115135	0.02244	0.0201168	0.00821266
	671.014	0.0124759	0.035174	0.0468676	0.00615734	0.0154947	0.024553	0.0234537	0.0139631	0.00570041
	671.639	0.0105473	0.0263425	0.0471235	0.00194197	0.0116904	0.00245065	0.0166827	0.0158238	0.00646005
	672.264	0.0122076	0.0376864	0.0727062	0.0150617	0.0174761	0.00494756	0.0266809	0.0228801	0.00934077
	672.889	0.0106699	0.0360114	0.0585334	0.0113674	0.0195962	0.0110511	0.0245382	0.0176041	0.00718686
	673.514	0.0128314	0.0156074	0.0575612	0.0069625	0.0202105	0.023397	0.0227617	0.0164181	0.00670267
	674.14	0.0140476	0.0207086	0.0605289	0.0203665	0.0286712	-0.00180333	0.0237532	0.0189064	0.0077185
	674.765	0.0164911	0.0350216	0.0418023	-0.0181404	0.0258774	0.0395345	0.0234311	0.0204674	0.00835579
	675.39	0.00849751	0.0237539	0.0575101	0.0128357	0.0268284	-0.00134098	0.0213474	0.01869	0.00763017
	676.015	0.0112106	0.0235255	0.0633429	0.0145407	0.0101647	0.00263563	0.0209033	0.0199644	0.00815042
	676.64	0.0129798	0.0241345	0.0389882	0.00790976	0.0159504	-0.0142879	0.0142791	0.0161699	0.00660132
	677.266	0.00825505	0.0315956	0.0390905	0.00833603	0.0198934	-0.0023582	0.0174687	0.0143431	0.00585556
	677.891	0.00448098	0.0269515	0.0284992	0.00511531	0.0159306	-0.00614983	0.0124713	0.0125382	0.0051187
	678.516	0.0106563	0.0176632	0.0365833	-0.00317334	0.0102241	0.0122997	0.0140422	0.011879	0.00484959
	679.141	0.00216832	0.0393614	0.0410859	-0.00620473	0.0162476	0.0230271	0.0192809	0.0175322	0.00715751
	679.766	0.00697206	0.0422545	0.0410348	0.00487851	0.0213597	-0.0171548	0.0165575	0.0210053	0.00857537
	680.392	0.00526409	0.0178154	0.0487096	0.0166721	0.00844085	0.000138717	0.0161735	0.015798	0.00644952
	681.017	0.0119147	0.0319002	0.0371462	0.00203667	0.00552816	0.0204839	0.0181683	0.0129948	0.00530512
	681.642	0.00194903	0.0434727	0.0409836	0.0104674	0.00794549	0.00383783	0.0181093	0.0172871	0.00705743
	682.267	0.00860236	0.034641	0.0387323	0.00483112	0.0157721	0.00346794	0.0176745	0.0140475	0.00573487
	682.892	0.0069748	0.0239061	0.0411883	0.0143987	0.0124829	0.0282059	0.0211928	0.0114057	0.00465635
	683.518	0.00999569	0.0388284	0.0556682	0.00175242	0.0161288	0.00915535	0.0219215	0.0190185	0.00776429
	684.143	0.0056114	0.0143132	0.029369	0.0106569	0.0101845	-0.00929407	0.0101401	0.0114428	0.00467151
	684.768	0.00409144	0.0401988	0.0379648	0.00568368	0.00647924	0.0241368	0.0197591	0.0152115	0.00621008
	685.393	0.00660162	0.0261901	0.0360717	-0.00222615	0.0120668	-0.0111436	0.0112601	0.0160451	0.0065504
	686.019	0.00720225	0.0216982	0.0562822	-0.0120304	0.0177337	0.00106348	0.0153249	0.021376	0.00872671
	686.644	0.00827547	0.0316718	0.037709	0.0165774	0.00398265	-0.0379623	0.0100423	0.0245638	0.0100281
	687.269	0.00254421	0.00441582	0.0414441	0.00146824	0.0157523	0.00490137	0.0117543	0.0140767	0.00574677
	687.894	0.0104383	0.0323571	0.0408813	-0.00852551	0.00697461	0.00883172	0.0151596	0.0165714	0.00676525
	688.519	0.00682768	0.0299969	0.0395509	0.0111779	0.0122848	0.00679715	0.0177726	0.0125006	0.00510334
	689.144	0.00635235	0.024972	0.0293691	0.0159143	0.00911454	-0.00799942	0.0129538	0.0123829	0.0050553
	689.77	0.00406963	0.0232209	0.0279364	0.0191351	0.0105213	0.0055487	0.015072	0.00895228	0.00365475
	690.395	0.00663291	0.0282457	0.0465095	-0.00274706	0.0137114	-0.0145191	0.0129722	0.0200068	0.00816774
	691.02	0.0090491	0.020937	0.0513191	0.000426276	0.00552816	-0.00961776	0.0129403	0.0194612	0.00794499
	691.645	0.0062325	0.0140849	0.0294714	0.00653623	0.00853991	-4.62623e-05	0.0108031	0.00932024	0.00380497
	692.27	0.00792816	0.0228403	0.036481	-0.0068678	0.00128791	-0.00365292	0.00966944	0.0153654	0.00627291
	692.896	0.0109641	0.0325854	0.0499376	0.00658361	0.0126018	-0.000323697	0.0187248	0.0171966	0.00702046
	693.521	0.0094318	0.0376102	0.0317226	0.0155828	0.00850029	-0.0190505	0.0139662	0.0183371	0.00748607
	694.146	0.00560873	0.0255049	0.0174986	0.0101832	0.00610276	0.0075832	0.0120802	0.00719969	0.00293926
	694.771	0.00312988	0.0256571	0.0597102	0.0102306	0.0123046	0.014704	0.0209561	0.0185774	0.00758421
	695.396	0.00701019	0.0236777	0.0300853	0.00819394	0.0162477	0.0254778	0.0184488	0.00868914	0.00354732
	696.022	0.00513337	0.0287027	0.0481979	0.01132	0.007252	0.0174784	0.0196807	0.0149191	0.0060907
	696.647	0.00663972	0.0162166	0.0280899	0.0161038	0.00128791	-0.00739829	0.0101566	0.0114956	0.00469305
	697.272	0.00956531	0.0319003	0.0371974	0.00269975	0.00760865	-0.00647346	0.0137497	0.0156287	0.00638039
	697.897	0.00806302	0.0207085	0.0439	0.00132621	0.0114922	0.000323697	0.0143023	0.0148754	0.00607287
	698.523	0.00604182	0.0372296	0.0280387	-0.00838342	0.0102836	0.00092476	0.0123558	0.0156504	0.00638924
	699.148	0.00761628	0.0320524	0.0389882	0.0053521	0.0102043	-0.0164149	0.0129664	0.0182524	0.00745151
	699.773	0.00365015	0.0230687	0.0311086	0.00312602	0.0146625	-0.0070284	0.0114313	0.0129316	0.00527928
	700.398	0.00900416	0.0162926	0.038323	0.00511531	0.00481485	0.0104501	0.014	0.0115306	0.00470736
	pHo=4
	Wavelenght (nm)	Exp_1	Exp_2	Exp_3	Exp_4	Exp_5	Exp_6	Average	S.D.	S.E.M.
	405.929	0.000180066	0.00680699	0.00994944	-0.00457205	0.000988194	-0.00574611	0.00126775	0.00563639	0.00230105
	406.554	-0.0021112	0.0103494	0.00836547	0.0163741	-6.93556e-05	0.0011807	0.00568151	0.00654956	0.00267385
	407.179	-0.00190714	0.00215324	0.00846445	-0.00287079	-0.00194172	-0.00228271	0.000269221	0.00401472	0.001639
	407.805	0.00136997	0.0140306	0.00702891	-0.00579469	-0.00214976	0.00287306	0.00289302	0.00638198	0.00260543
	408.43	0.000736754	0.00639013	0.0073755	0.00462516	-0.0012309	-0.00432927	0.00226123	0.00421793	0.00172196
	409.055	-0.00307003	0.0103493	0.00876144	-0.00574158	-0.00110953	-0.00491956	0.000711665	0.00643759	0.00262813
	409.68	0.00136247	0.0155586	0.003465	-0.00505044	-6.93556e-05	0.000905184	0.00269525	0.00630712	0.00257487
	410.305	-0.000657205	0.00354238	0.00707843	-0.00707068	0.00182036	-0.00920946	-0.000749364	0.00574221	0.00234425
	410.93	-0.00038263	0.00229213	0.00653396	0.0013291	0.00317262	-0.00763523	0.000884989	0.00434976	0.00177578
	411.556	-0.00142101	0.00882124	0.00965244	0.00744276	0.00156031	-0.00314851	0.00381787	0.00505452	0.0020635
	412.181	0.000934842	0.0141695	0.00623696	-0.00361512	0.00109221	0.00499826	0.00396944	0.00555659	0.00226847
	412.806	0.00669828	0.00951576	0.00217804	-0.00095693	0.00423017	-0.00200719	0.00327635	0.00405365	0.00165489
	413.431	0.00149	0.00569562	0.00534597	0.0093567	0.00776686	-0.0102721	0.00323051	0.00650654	0.00265628
	414.057	0.00591198	0.0177813	0.00222749	0.00350874	0.00851233	0.0189306	0.00947873	0.00658466	0.00268818
	414.682	0.0049877	0.0213237	-0.0104445	0.0013291	0.00637991	0.0273136	0.00848159	0.0125535	0.00512494
	415.307	0.0105216	0.0145169	-0.000742495	0.00622005	0.0160885	0.0244799	0.0118474	0.00792278	0.00323446
	415.932	0.0124527	0.0351459	0.0245519	0.0105793	0.017302	0.0316034	0.0219392	0.00926626	0.00378294
	416.557	0.0197377	0.020004	0.0187109	0.00834658	0.0162618	0.0316821	0.0191239	0.00687231	0.00280561
	417.183	0.0280445	0.0200735	0.0232649	0.0210525	0.0326277	0.049314	0.0290628	0.0100203	0.00409079
	417.808	0.0430737	0.0413972	0.0240073	0.0580006	0.0360431	0.0516754	0.0423662	0.0108748	0.00443961
	418.433	0.0413241	0.0651519	0.0558356	0.0283357	0.0566218	0.0617506	0.0515033	0.0127581	0.00520847
	419.058	0.0467784	0.0746677	0.0469752	0.0713976	0.0584941	0.0854433	0.0639594	0.0144053	0.00588093
	419.683	0.0570524	0.0755707	0.0803874	0.0583196	0.0671278	0.139756	0.0797023	0.0281434	0.0114895
	420.308	0.0670773	0.0861284	0.0617756	0.0441783	0.0771311	0.127673	0.0773273	0.0260063	0.010617
	420.934	0.0813322	0.102382	0.0734576	0.122115	0.0931849	0.1187	0.0985285	0.0179391	0.0073236
	421.559	0.0897515	0.11794	0.0802885	0.0912273	0.120941	0.17679	0.112823	0.0322517	0.0131667
	422.184	0.102155	0.149197	0.11375	0.10909	0.129367	0.191706	0.132544	0.0305897	0.0124882
	422.809	0.115322	0.13982	0.150331	0.124348	0.130875	0.213589	0.145714	0.0323095	0.0131903
	423.435	0.122995	0.146418	0.147856	0.158531	0.147276	0.241217	0.160716	0.0375466	0.0153284
	424.06	0.133667	0.175869	0.157805	0.175171	0.179921	0.213864	0.172716	0.0241806	0.00987169
	424.685	0.152023	0.208375	0.196662	0.166984	0.206532	0.25696	0.197923	0.0335021	0.0136772
	425.31	0.186201	0.190941	0.199533	0.180275	0.194709	0.251489	0.200525	0.0235911	0.00963102
	425.935	0.197434	0.232477	0.218343	0.191333	0.232382	0.310288	0.230376	0.0390485	0.0159415
	426.56	0.203306	0.216154	0.239083	0.203879	0.238432	0.282935	0.230632	0.0275073	0.0112298
	427.186	0.230264	0.242062	0.231609	0.211003	0.269413	0.25633	0.240114	0.0188944	0.00771359
	427.811	0.252839	0.302213	0.265912	0.283942	0.288657	0.390182	0.297291	0.0444716	0.0181555
	428.436	0.240226	0.267137	0.272941	0.248855	0.291361	0.345473	0.277665	0.0345214	0.0140933
	429.061	0.28525	0.301935	0.317788	0.249174	0.294464	0.372944	0.303593	0.0374055	0.0152707
	429.687	0.271952	0.291795	0.312937	0.278573	0.30178	0.363813	0.303475	0.0302305	0.0123416
	430.312	0.279985	0.310965	0.329767	0.332374	0.322151	0.377509	0.325458	0.0290532	0.0118609
	430.937	0.322107	0.306728	0.328084	0.304463	0.357743	0.416748	0.339312	0.0388035	0.0158414
	431.562	0.30589	0.289155	0.344716	0.27331	0.343579	0.404705	0.326892	0.0435645	0.0177851
	432.187	0.346477	0.365906	0.328034	0.265389	0.35568	0.424462	0.347658	0.0473478	0.0193297
	432.812	0.37301	0.322703	0.351547	0.348269	0.387649	0.406318	0.364916	0.0274901	0.0112228
	433.438	0.369403	0.428419	0.380257	0.243698	0.4101	0.414426	0.374384	0.0618289	0.0252415
	434.063	0.36436	0.378201	0.434112	0.316265	0.408592	0.379713	0.380207	0.0366411	0.0149587
	434.688	0.361293	0.382368	0.392631	0.319561	0.420294	0.493021	0.394862	0.0536037	0.0218836
	435.313	0.409513	0.372991	0.47787	0.378253	0.425253	0.38908	0.408827	0.035698	0.0145737
	435.938	0.437927	0.381465	0.443913	0.394415	0.418179	0.398762	0.412444	0.022893	0.00934601
	436.564	0.422103	0.43467	0.503956	0.409513	0.463914	0.484284	0.453073	0.0338527	0.0138203
	437.189	0.437531	0.46676	0.456486	0.415999	0.488185	0.453231	0.453032	0.0225385	0.00920131
	437.814	0.450675	0.473706	0.547269	0.456243	0.479413	0.506599	0.485651	0.0329274	0.0134425
	438.439	0.462574	0.470928	0.454704	0.395478	0.510341	0.482946	0.462829	0.0349522	0.0142692
	439.065	0.492844	0.476484	0.500046	0.417222	0.493854	0.603928	0.497396	0.0551583	0.0225183
	439.69	0.467633	0.467871	0.557663	0.488353	0.54661	0.534936	0.510511	0.0371275	0.0151572
	440.315	0.488967	0.544553	0.538507	0.524079	0.563288	0.510535	0.528321	0.024059	0.00982205
	440.94	0.500572	0.507046	0.573305	0.459486	0.554827	0.562879	0.526353	0.0405342	0.016548
	441.565	0.526919	0.497669	0.533706	0.482133	0.598221	0.503332	0.523663	0.0376035	0.0153515
	442.19	0.534558	0.548165	0.596273	0.515041	0.607132	0.633052	0.57237	0.0423563	0.0172919
	442.816	0.526211	0.580811	0.618598	0.602866	0.614223	0.593971	0.589447	0.0309234	0.0126244
	443.441	0.585118	0.557959	0.621419	0.515201	0.635252	0.634193	0.591524	0.0440066	0.0179656
	444.066	0.575866	0.561571	0.589739	0.527269	0.657236	0.572049	0.580622	0.0392819	0.0160368
	444.691	0.581503	0.622625	0.615529	0.56225	0.67608	0.690906	0.624815	0.0463278	0.0189132
	445.317	0.597911	0.579769	0.636714	0.592499	0.676531	0.611288	0.615785	0.0324223	0.0132364
	445.942	0.615803	0.590187	0.648545	0.637369	0.69203	0.65214	0.639346	0.0316193	0.0129085
	446.567	0.601353	0.691597	0.652406	0.62227	0.698254	0.70169	0.661262	0.0389676	0.0159085
	447.192	0.632648	0.648324	0.733239	0.559485	0.695532	0.75431	0.67059	0.0656197	0.0267891
	447.817	0.660049	0.641378	0.716607	0.679633	0.694041	0.717826	0.684923	0.0280252	0.0114413
	448.442	0.645375	0.65145	0.79744	0.664747	0.74626	0.773319	0.713099	0.0613249	0.0250358
	449.068	0.713092	0.679441	0.74398	0.691276	0.745167	0.78859	0.726924	0.03684	0.0150399
	449.693	0.68594	0.729313	0.737842	0.694891	0.750784	0.761512	0.726714	0.0276771	0.0112991
	450.318	0.67921	0.681803	0.763879	0.650287	0.729703	0.81059	0.719245	0.0550838	0.0224879
	450.943	0.709971	0.67958	0.771502	0.754008	0.767324	0.75919	0.740263	0.0338016	0.0137995
	451.568	0.7242	0.684651	0.738337	0.789202	0.792843	0.742975	0.745368	0.0373388	0.0152435
	452.194	0.728366	0.728687	0.804023	0.761078	0.83941	0.740614	0.76703	0.0414441	0.0169195
	452.819	0.760411	0.810648	0.769176	0.73152	0.807718	0.755176	0.772441	0.0283792	0.0115858
	453.444	0.782378	0.763	0.846296	0.720409	0.847419	0.896112	0.809269	0.0593412	0.0242259
	454.069	0.760331	0.751192	0.821695	0.79085	0.825072	0.787999	0.789523	0.0277618	0.0113337
	454.695	0.780355	0.784601	0.867333	0.778037	0.862468	0.782293	0.809181	0.0394739	0.0161152
	455.32	0.826279	0.805231	0.834367	0.774848	0.887173	0.833417	0.826885	0.0339372	0.0138548
	455.945	0.791201	0.798563	0.867878	0.743747	0.883792	0.867421	0.825434	0.0508867	0.0207744
	456.57	0.823177	0.760499	0.808132	0.835879	0.848824	0.91764	0.832358	0.0472431	0.0192869
	457.195	0.849807	0.797451	0.836594	0.832848	0.928746	0.900796	0.857707	0.0440834	0.017997
	457.82	0.815226	0.83475	0.816497	0.837845	0.885751	0.992497	0.863761	0.0621278	0.0253636
	458.446	0.866054	0.867674	0.892529	0.865278	0.938715	0.975888	0.901023	0.04225	0.0172485
	459.071	0.859728	0.872188	0.886886	0.813018	0.911929	0.99844	0.890365	0.0568752	0.0232192
	459.696	0.877102	0.875245	0.927327	0.85709	0.889617	1.00037	0.904458	0.0479364	0.01957
	460.321	0.891813	0.909626	0.886193	0.80935	0.964893	0.94944	0.901886	0.0503353	0.0205493
	460.947	0.907956	0.901847	0.961333	0.835347	0.930913	0.894892	0.905381	0.0383329	0.0156493
	461.572	0.905923	0.943453	0.927228	0.833327	0.964858	0.942278	0.919511	0.0424654	0.0173364
	462.197	0.879343	0.971722	0.928218	0.908605	0.949065	1.04996	0.947818	0.054185	0.0221209
	462.822	0.955601	0.873647	0.983064	0.929551	0.967962	0.958532	0.944726	0.0355927	0.0145307
	463.447	0.919973	0.96693	0.996231	1.03955	0.982126	0.970614	0.979236	0.0357589	0.0145985
	464.072	0.926949	0.93998	1.03484	0.859323	1.01597	0.856952	0.939002	0.0687213	0.0280554
	464.698	0.914897	0.96561	1.01613	0.933432	0.976821	1.03823	0.974186	0.0430452	0.0175731
	465.323	0.950674	0.983808	0.962373	0.975803	0.994314	0.988797	0.975961	0.0152056	0.00620767
	465.948	0.972446	0.961095	0.975243	0.949647	0.968881	0.959752	0.964511	0.00868418	0.0035453
	466.573	0.915203	0.952204	0.991528	0.917696	1.02965	0.953927	0.960034	0.0402877	0.0164474
	467.199	0.930541	0.977279	0.975094	0.994516	1.00324	1.0659	0.991095	0.0405549	0.0165565
	467.824	0.998776	0.961303	1.00672	0.950019	1.01075	0.964278	0.981975	0.0240985	0.00983815
	468.449	0.933145	1.02208	1.02964	0.984415	1.00758	0.993599	0.995076	0.031706	0.0129439
	469.074	0.955255	0.96693	0.965442	0.896165	0.9875	0.994386	0.960946	0.0319069	0.0130259
	469.699	1.00182	1.04556	1.02751	0.917749	0.980253	1.01143	0.997386	0.0409886	0.0167335
	470.325	0.989262	1.05146	0.991677	1.03184	1.02788	0.975062	1.0112	0.0273657	0.011172
	470.95	0.971798	0.978112	1.01841	1.03737	1.03518	0.948653	0.998252	0.0338253	0.0138091
	471.575	0.977333	0.97075	0.973411	0.991539	0.987448	1.01088	0.985226	0.013627	0.00556321
	472.2	0.990944	1.00402	1.00742	0.996058	1.01858	1.00529	1.00372	0.00874745	0.00357113
	472.825	1.01839	0.973111	1.05479	0.904937	1.02635	1.0278	1.0009	0.049265	0.0201124
	473.45	0.987729	0.93734	0.99336	0.993347	1.02292	0.955462	0.981693	0.0278782	0.0113812
	474.076	1.01643	0.988878	0.984598	0.996536	1.02791	0.909336	0.987281	0.0380159	0.0155199
	474.701	0.984573	1.01916	1.05301	0.966446	0.996169	1.00855	1.00465	0.0273823	0.0111788
	475.326	0.985234	1.06174	0.97158	1.00201	1.04287	0.981792	1.00754	0.0333426	0.0136121
	475.951	1.02506	0.982141	1.03227	1.03593	1.00005	1.03642	1.01864	0.0204924	0.008366
	476.577	0.984396	1.00416	1.08068	1.08984	1.03963	1.03449	1.03887	0.0377215	0.0153997
	477.202	1.01108	1.05591	1.03588	0.998238	0.990343	1.01658	1.01801	0.022218	0.00907047
	477.827	0.985943	1.07028	1.02202	1.07878	1.00347	0.993677	1.0257	0.0363295	0.0148314
	478.452	1.03928	1.04382	0.975787	1.00754	1.00113	1.08007	1.0246	0.0338771	0.0138303
	479.077	1.03102	1.01319	1.03583	1.0968	0.985593	1.06027	1.03712	0.035034	0.0143026
	479.702	1.00293	1.03215	0.958759	0.998504	1.00787	0.93358	0.988966	0.0328845	0.0134251
	480.328	0.995216	1.00659	1.05122	1.05454	0.970805	1.0868	1.02753	0.0397986	0.0162477
	480.953	1.00879	0.993324	0.924456	0.947786	0.960646	1.06637	0.983562	0.0463452	0.0189204
	481.578	0.976158	0.962276	0.949255	1.06793	0.952844	0.971087	0.979926	0.0404627	0.0165188
	482.203	1.04097	0.994852	1.02618	0.955707	0.96205	0.933068	0.985471	0.038742	0.0158164
	482.829	0.985898	1.01131	1.01554	0.982395	0.977584	0.975337	0.991344	0.0160172	0.00653899
	483.454	0.998713	1.07737	0.969352	1.00759	0.958843	1.17267	1.03076	0.0739571	0.0301929
	484.079	0.964605	1.0209	0.930099	1.00292	1.0203	1.04512	0.997323	0.0387059	0.0158016
	484.704	1.0264	1.06195	0.972768	1.04672	1.00855	0.975967	1.01539	0.0333875	0.0136304
	485.329	0.972617	1.01868	0.981034	0.981279	0.96146	1.02981	0.990812	0.0247523	0.0101051
	485.954	1.02075	0.955469	0.940989	0.966446	0.916818	1.01737	0.969641	0.0381062	0.0155568
	486.58	0.966608	1.0175	1.03994	0.959801	0.902464	1.09404	0.996724	0.0618117	0.0252345
	487.205	1.00976	1.05292	1.00969	1.04513	0.908878	1.0929	1.01988	0.057137	0.0233261
	487.83	0.975681	1.00673	0.975787	0.997281	0.889426	0.93358	0.963081	0.0401878	0.0164066
	488.455	1.0033	0.994643	0.94975	1.01876	0.944644	0.83015	0.956874	0.0628101	0.0256421
	489.08	0.933631	0.952621	0.921783	0.97777	0.906919	0.979037	0.945293	0.0271058	0.0110659
	489.706	0.958922	1.00867	0.918219	0.995101	0.910941	0.954754	0.957769	0.0359455	0.0146747
	490.331	0.931757	0.938452	0.963313	0.968892	0.913143	0.89749	0.935508	0.0253507	0.0103494
	490.956	0.929869	0.935257	0.914952	0.949859	0.88185	0.913941	0.920955	0.0213459	0.00871443
	491.581	0.929135	0.959567	0.919457	0.939546	0.856625	1.00245	0.934464	0.0439528	0.0179437
	492.207	0.924754	0.957692	0.948216	1.0422	0.887849	0.871278	0.938665	0.0555131	0.0226631
	492.832	0.925645	0.943314	0.954156	0.949275	0.846691	0.93846	0.926257	0.0366949	0.0149806
	493.457	0.941554	0.931228	0.958264	0.812115	0.839722	0.935036	0.902986	0.0557194	0.0227474
	494.082	0.892786	0.960123	0.945642	0.82296	0.830845	0.946292	0.899775	0.0556928	0.0227365
	494.707	0.901913	0.868993	0.922575	0.989306	0.824084	0.921655	0.904754	0.0509032	0.0207812
	495.332	0.897706	0.939146	0.866096	0.893454	0.834816	0.947512	0.896455	0.0390747	0.0159522
	495.958	0.91052	0.906223	0.887529	0.95273	0.824552	0.8834	0.894159	0.0384028	0.0156779
	496.583	0.861204	0.876912	0.854909	0.891753	0.820825	0.897135	0.867123	0.0255959	0.0104495
	497.208	0.864573	0.915044	0.861245	0.949328	0.793832	0.779616	0.860606	0.060373	0.0246472
	497.833	0.897376	0.890525	0.89342	0.928701	0.759488	0.860652	0.871693	0.0539261	0.0220153
	498.459	0.855888	0.94123	0.887727	0.867457	0.8081	0.866791	0.871199	0.0396377	0.016182
	499.084	0.900068	0.903861	0.796153	0.834549	0.772976	0.953691	0.860216	0.064037	0.026143
	499.709	0.848031	0.913933	0.801251	0.91323	0.778818	0.743369	0.833105	0.064795	0.0264524
	500.334	0.808927	0.84253	0.845405	0.798611	0.747595	0.853095	0.816027	0.0364606	0.014885
	500.959	0.84633	0.824123	0.756157	0.860227	0.771814	0.856952	0.819267	0.0410051	0.0167403
	501.584	0.821852	0.822942	0.814567	0.848	0.748184	0.847743	0.817215	0.0334321	0.0136486
	502.21	0.811964	0.790505	0.904062	0.809297	0.717585	0.827553	0.810161	0.0548948	0.0224107
	502.835	0.803427	0.827249	0.772047	0.87995	0.712644	0.831016	0.804389	0.0522897	0.0213472
	503.46	0.793644	0.904695	0.80833	0.834549	0.686379	0.743644	0.795207	0.0685716	0.0279942
	504.085	0.770126	0.833222	0.745069	0.803928	0.748496	0.783867	0.780785	0.0308937	0.0126123
	504.711	0.768035	0.838154	0.8706	0.861556	0.690973	0.711096	0.790069	0.0712391	0.0290833
	505.336	0.75516	0.826276	0.808973	0.825937	0.69255	0.737269	0.774361	0.0499846	0.0204061
	505.961	0.779682	0.772516	0.772443	0.820461	0.705917	0.73534	0.764393	0.03599	0.0146929
	506.586	0.766326	0.755221	0.742842	0.686651	0.645342	0.682602	0.713164	0.0441822	0.0180373
	507.211	0.733398	0.761124	0.757395	0.811424	0.64002	0.726367	0.738288	0.0517333	0.02112
	507.837	0.712385	0.803147	0.717003	0.759484	0.640558	0.671031	0.717268	0.0535468	0.0218604
	508.462	0.684677	0.796131	0.717201	0.768893	0.636709	0.689372	0.715497	0.053535	0.0218556
	509.087	0.728403	0.756818	0.727447	0.688618	0.656161	0.633249	0.698449	0.0433611	0.0177021
	509.712	0.748456	0.779253	0.745366	0.816261	0.588201	0.725107	0.733774	0.0712848	0.0291019
	510.337	0.69089	0.698612	0.680967	0.799622	0.590073	0.681776	0.690323	0.060863	0.0248472
	510.962	0.710256	0.781615	0.642555	0.697124	0.60344	0.699722	0.689119	0.055809	0.0227839
	511.588	0.659006	0.639156	0.708637	0.709989	0.586363	0.693425	0.666096	0.0440013	0.0179634
	512.213	0.654278	0.714379	0.730516	0.667937	0.577729	0.675872	0.670119	0.0490433	0.0200218
	512.838	0.644534	0.708683	0.655574	0.733062	0.59224	0.671779	0.667645	0.0453621	0.018519
	513.463	0.651556	0.660827	0.666563	0.752838	0.576498	0.651786	0.660011	0.0512738	0.0209324
	514.088	0.639663	0.643254	0.646416	0.692871	0.569824	0.642537	0.639094	0.035994	0.0146945
	514.714	0.64112	0.653534	0.608203	0.643482	0.523101	0.600229	0.611611	0.0440061	0.0179654
	515.339	0.599879	0.658535	0.635922	0.650287	0.560046	0.581456	0.614354	0.0363995	0.01486
	515.964	0.629607	0.598036	0.626517	0.654434	0.525684	0.58425	0.603088	0.0413528	0.0168822
	516.589	0.606598	0.658048	0.634685	0.641781	0.510619	0.570121	0.603642	0.0502727	0.0205237
	517.215	0.604248	0.593035	0.613697	0.602175	0.51868	0.5726	0.584073	0.0318864	0.0130176
	517.84	0.592346	0.644087	0.666018	0.594147	0.507498	0.566028	0.595021	0.0515702	0.0210534
	518.465	0.566222	0.597967	0.588106	0.534233	0.46029	0.553394	0.550035	0.045321	0.0185022
	519.09	0.566237	0.617624	0.68067	0.586492	0.507914	0.480821	0.573293	0.0665139	0.0271542
	519.715	0.57261	0.632279	0.637209	0.538061	0.488532	0.5029	0.561932	0.0579823	0.0236712
	520.341	0.522002	0.514895	0.576127	0.612595	0.485654	0.581534	0.548801	0.0442403	0.018061
	520.966	0.541767	0.590465	0.52935	0.585056	0.449125	0.538478	0.53904	0.046455	0.0189652
	521.591	0.545368	0.553791	0.575929	0.505791	0.459475	0.587084	0.537906	0.0435028	0.0177599
	522.216	0.52739	0.5258	0.536082	0.515307	0.446646	0.474405	0.504272	0.0325173	0.0132751
	522.841	0.537007	0.540872	0.603302	0.538167	0.449143	0.522106	0.531766	0.0450716	0.0184004
	523.466	0.517721	0.561501	0.555584	0.537529	0.429656	0.575828	0.529637	0.0483435	0.0197362
	524.092	0.526592	0.511561	0.536527	0.575274	0.429205	0.485898	0.510843	0.0453626	0.0185192
	524.717	0.517646	0.560251	0.539151	0.524504	0.424108	0.535959	0.516937	0.043601	0.0178
	525.342	0.483523	0.490654	0.470198	0.550129	0.441376	0.45457	0.481741	0.0347859	0.0142013
	525.967	0.474383	0.487736	0.486829	0.555498	0.409147	0.533244	0.49114	0.0464552	0.0189652
	526.592	0.47366	0.538858	0.551822	0.53923	0.4032	0.431231	0.489667	0.0575717	0.0235035
	527.218	0.45595	0.534482	0.521826	0.492341	0.370243	0.454412	0.471542	0.0543453	0.0221864
	527.843	0.476388	0.424946	0.504501	0.458423	0.380888	0.404665	0.441635	0.0423816	0.0173022
	528.468	0.43942	0.486903	0.473118	0.511745	0.362979	0.465826	0.456665	0.0472179	0.0192766
	529.093	0.450318	0.418348	0.505194	0.494627	0.372376	0.336972	0.429639	0.0610373	0.0249184
	529.718	0.466324	0.483222	0.485641	0.446886	0.340008	0.353462	0.429257	0.059842	0.0244304
	530.344	0.442344	0.491626	0.466782	0.445398	0.370451	0.473264	0.448311	0.038614	0.0157641
	530.969	0.425299	0.426127	0.481929	0.424399	0.347255	0.388057	0.415511	0.0410517	0.0167593
	531.594	0.408245	0.459189	0.450893	0.468843	0.356721	0.415528	0.42657	0.0382518	0.0156163
	532.219	0.406349	0.426196	0.491185	0.387397	0.365337	0.350983	0.404575	0.0459688	0.0187667
	532.845	0.378439	0.423001	0.458417	0.447418	0.312529	0.366017	0.397637	0.0507072	0.0207011
	533.47	0.391153	0.422862	0.442181	0.362145	0.333212	0.442959	0.399085	0.0410575	0.0167617
	534.095	0.383949	0.430781	0.409659	0.369109	0.314124	0.299386	0.367835	0.0475093	0.0193956
	534.72	0.38278	0.430572	0.403224	0.305314	0.306392	0.368182	0.366077	0.0466859	0.0190594
	535.345	0.402855	0.375492	0.375604	0.413394	0.278116	0.265697	0.35186	0.0582687	0.0237881
	535.971	0.395901	0.407026	0.441686	0.437955	0.324925	0.352754	0.393374	0.0425235	0.0173602
	536.596	0.35348	0.40647	0.431588	0.400582	0.30055	0.357595	0.375044	0.0431198	0.0176036
	537.221	0.374973	0.414111	0.416738	0.338115	0.293268	0.366017	0.367204	0.0428724	0.0175026
	537.846	0.34247	0.356252	0.418025	0.40425	0.2721	0.343426	0.356087	0.0475316	0.0194047
	538.471	0.354577	0.351043	0.412233	0.373841	0.276781	0.316073	0.347425	0.042692	0.0174289
	539.096	0.331538	0.407582	0.418322	0.389683	0.263917	0.321583	0.355437	0.0546801	0.0223231
	539.722	0.319367	0.307978	0.377534	0.32945	0.282363	0.341813	0.326418	0.0294097	0.0120065
	540.347	0.319474	0.374867	0.395304	0.355074	0.25303	0.351691	0.341573	0.0458412	0.0187146
	540.972	0.330825	0.350903	0.363922	0.353692	0.264507	0.284942	0.324798	0.0372086	0.0151903
	541.597	0.308934	0.352571	0.387731	0.333756	0.242784	0.292381	0.319693	0.0459794	0.018771
	542.222	0.303667	0.338887	0.389563	0.337318	0.267748	0.352518	0.331617	0.0381669	0.0155816
	542.848	0.315406	0.304089	0.369664	0.34391	0.250013	0.271876	0.309159	0.0404587	0.0165172
	543.473	0.302846	0.348889	0.379861	0.32121	0.245766	0.274001	0.312095	0.0446567	0.018231
	544.098	0.31665	0.323467	0.374416	0.275171	0.246858	0.255464	0.298671	0.0443077	0.0180886
	544.723	0.272269	0.266442	0.32749	0.296702	0.220228	0.294624	0.279626	0.0330743	0.0135025
	545.348	0.284114	0.333261	0.374812	0.257627	0.221806	0.24838	0.286667	0.0523819	0.0213848
	545.974	0.273672	0.334928	0.34531	0.364803	0.236282	0.292341	0.307889	0.0445546	0.0181893
	546.599	0.270359	0.302005	0.304869	0.309886	0.225239	0.285848	0.283034	0.0290589	0.0118632
	547.224	0.270533	0.269915	0.317045	0.237	0.221754	0.214848	0.255183	0.0350111	0.0142932
	547.849	0.266342	0.324023	0.33739	0.249174	0.20915	0.272073	0.276359	0.0435342	0.0177728
	548.475	0.252887	0.2936	0.315412	0.28995	0.20388	0.287855	0.273931	0.0363043	0.0148212
	549.1	0.237292	0.294642	0.329123	0.205527	0.230076	0.287501	0.264027	0.0428476	0.0174924
	549.725	0.265023	0.276305	0.300711	0.211535	0.221615	0.220909	0.24935	0.033212	0.0135588
	550.35	0.233407	0.285196	0.32051	0.287983	0.18604	0.229764	0.25715	0.0449482	0.01835
	550.975	0.244178	0.291239	0.286108	0.191652	0.210815	0.218508	0.240417	0.0374589	0.0152925
	551.601	0.236573	0.247133	0.290761	0.210099	0.189334	0.216422	0.231721	0.0322619	0.0131709
	552.226	0.237259	0.226504	0.311947	0.256245	0.205544	0.244995	0.247082	0.033018	0.0134795
	552.851	0.233386	0.230324	0.301849	0.235245	0.187046	0.207646	0.232583	0.0353697	0.0144396
	553.476	0.197391	0.254495	0.259576	0.167516	0.210572	0.227088	0.21944	0.0320396	0.0130801
	554.101	0.212475	0.227337	0.254775	0.223656	0.171616	0.246648	0.222751	0.0268912	0.0109783
	554.726	0.216998	0.203027	0.301305	0.170493	0.187757	0.198161	0.212957	0.0419869	0.0171411
	555.352	0.209663	0.21796	0.262794	0.222912	0.160174	0.147076	0.20343	0.0391587	0.0159865
	555.977	0.215812	0.233936	0.322441	0.150717	0.166901	0.224609	0.219069	0.0552896	0.0225719
	556.602	0.201421	0.231227	0.278386	0.203188	0.173107	0.22697	0.21905	0.0326724	0.0133384
	557.227	0.203406	0.206778	0.222699	0.212332	0.164474	0.181631	0.198553	0.0196293	0.00801362
	557.852	0.207773	0.210181	0.276109	0.158531	0.159567	0.181119	0.19888	0.040125	0.016381
	558.478	0.194082	0.244563	0.271605	0.186761	0.154158	0.186236	0.206234	0.0395414	0.0161427
	559.103	0.177911	0.208583	0.232896	0.178574	0.172847	0.165337	0.189358	0.0236717	0.00966393
	559.728	0.179518	0.213307	0.243637	0.197872	0.153257	0.131687	0.186546	0.0371279	0.0151574
	560.353	0.182372	0.194067	0.241558	0.1765	0.146097	0.196429	0.189504	0.0285266	0.0116459
	560.978	0.187529	0.212473	0.273387	0.160392	0.149755	0.172736	0.192712	0.0412608	0.0168446
	561.604	0.17792	0.207889	0.174536	0.211854	0.15525	0.189857	0.186218	0.0195975	0.00800065
	562.229	0.161419	0.190872	0.199137	0.167144	0.148905	0.145344	0.168803	0.0200445	0.00818315
	562.854	0.182075	0.197123	0.215324	0.167516	0.139422	0.163251	0.177452	0.0244582	0.00998503
	563.479	0.165725	0.185871	0.231362	0.182561	0.137047	0.155774	0.17639	0.0295423	0.0120606
	564.105	0.155714	0.161699	0.206909	0.127644	0.129939	0.129129	0.151839	0.0280644	0.0114572
	564.73	0.141762	0.182745	0.240024	0.181391	0.124651	0.141841	0.168736	0.0383683	0.0156638
	565.355	0.15268	0.17573	0.23948	0.139765	0.128066	0.133419	0.161523	0.0381659	0.0155812
	565.98	0.145926	0.190594	0.197801	0.158957	0.136371	0.130664	0.160052	0.0257648	0.0105184
	566.605	0.146748	0.152114	0.192455	0.167303	0.123073	0.123619	0.150886	0.0242663	0.00990668
	567.231	0.135835	0.13725	0.191267	0.119085	0.124877	0.143927	0.14204	0.0234869	0.0095885
	567.856	0.140419	0.160657	0.206859	0.175225	0.120456	0.108782	0.152066	0.0332185	0.0135614
	568.481	0.130225	0.171493	0.19592	0.153428	0.12049	0.130113	0.150278	0.0265807	0.0108515
	569.106	0.135795	0.167186	0.172952	0.147952	0.10038	0.119369	0.140606	0.025492	0.0104071
	569.731	0.143435	0.155587	0.191069	0.11632	0.11021	0.160693	0.146219	0.0274078	0.0111892
	570.356	0.125257	0.174966	0.177951	0.120042	0.106968	0.134442	0.139937	0.027082	0.0110562
	570.982	0.114636	0.138014	0.189485	0.147367	0.111076	0.124485	0.137511	0.0264273	0.0107889
	571.607	0.12639	0.154475	0.205226	0.128601	0.111406	0.141527	0.144604	0.030199	0.0123287
	572.232	0.113364	0.130512	0.187257	0.145879	0.0985073	0.134127	0.134941	0.0278983	0.0113894
	572.857	0.131635	0.124886	0.150529	0.101062	0.105771	0.150461	0.127391	0.0193754	0.00790998
	573.482	0.116912	0.154475	0.16127	0.101222	0.0980912	0.134836	0.127801	0.024457	0.00998453
	574.108	0.109194	0.146488	0.192009	0.127378	0.106569	0.115079	0.132786	0.02967	0.0121127
	574.733	0.132888	0.120093	0.158201	0.147527	0.0891108	0.113701	0.12692	0.0226922	0.00926406
	575.358	0.118573	0.100298	0.151221	0.0816049	0.0966176	0.113308	0.11027	0.0218431	0.0089174
	575.983	0.0988716	0.15003	0.158547	0.115044	0.0948839	0.104059	0.120239	0.0249775	0.010197
	576.609	0.102866	0.118913	0.16028	0.0851137	0.0898043	0.17191	0.121481	0.0334852	0.0136703
	577.234	0.109543	0.125581	0.137956	0.132641	0.0821241	0.0950071	0.113809	0.0202152	0.00825282
	577.859	0.117307	0.137597	0.18597	0.117968	0.0820027	0.123029	0.127312	0.0311054	0.0126987
	578.484	0.119171	0.11287	0.174981	0.0997866	0.0936704	0.107247	0.117954	0.0268137	0.0109466
	579.109	0.10418	0.13593	0.141322	0.100637	0.0844299	0.110553	0.112842	0.019919	0.00813192
	579.735	0.0961182	0.101965	0.158151	0.101594	0.106014	0.110868	0.112452	0.0209247	0.00854249
	580.36	0.107851	0.12954	0.131917	0.0745343	0.0919367	0.105791	0.106928	0.0200498	0.00818529
	580.985	0.0966719	0.130651	0.146123	0.10186	0.0972591	0.125902	0.116411	0.0189025	0.00771692
	581.61	0.104183	0.143293	0.144638	0.0827213	0.0854007	0.0996511	0.109981	0.0251607	0.0102718
	582.235	0.096903	0.158504	0.161121	0.0641143	0.0924568	0.113662	0.11446	0.0352252	0.0143806
	582.861	0.0951564	0.109814	0.155033	0.120999	0.0835631	0.0905991	0.109194	0.0239469	0.00977627
	583.486	0.0866604	0.114051	0.147905	0.118766	0.0821068	0.0857582	0.105874	0.023588	0.00962974
	584.111	0.0874212	0.108355	0.131372	0.0850605	0.0837191	0.112442	0.101395	0.0175292	0.00715625
	584.736	0.0865929	0.099117	0.163893	0.113822	0.0978139	0.11622	0.11291	0.0249059	0.0101678
	585.361	0.101166	0.104952	0.128798	0.0743216	0.0898389	0.121809	0.103481	0.018352	0.00749217
	585.986	0.0697917	0.100923	0.121819	0.091759	0.0869784	0.0851679	0.0927398	0.0159721	0.00652058
	586.612	0.083826	0.101826	0.1286	0.0947893	0.0964789	0.0691103	0.0957718	0.018117	0.00739624
	587.237	0.0879674	0.0805022	0.148945	0.0702281	0.0916073	0.0603731	0.0899371	0.028402	0.0115951
	587.862	0.0762979	0.105646	0.127858	0.113449	0.0957508	0.118464	0.106244	0.0167114	0.00682239
	588.487	0.089534	0.0952969	0.1286	0.0927691	0.0856608	0.109057	0.100153	0.0146596	0.00598475
	589.112	0.0811236	0.106757	0.0901884	0.0837314	0.0995995	0.0523444	0.0856241	0.0172923	0.00705954
	589.738	0.0918147	0.0977974	0.128303	0.0853263	0.0918153	0.0968961	0.0986588	0.0138688	0.00566193
	590.363	0.0835844	0.0958525	0.114443	0.0965968	0.0823495	0.0993363	0.0953605	0.0107214	0.004377
	590.988	0.0827006	0.102034	0.130085	0.103508	0.0861982	0.0996905	0.100703	0.0153213	0.00625489
	591.613	0.0697872	0.110578	0.106672	0.0851668	0.0880879	0.0556503	0.0859903	0.0192371	0.00785352
	592.238	0.0820599	0.109327	0.123155	0.119882	0.091746	0.0600976	0.0977114	0.0222456	0.00908174
	592.864	0.0803868	0.099256	0.112859	0.0939386	0.0658796	0.0788314	0.0885253	0.0153277	0.00625751
	593.489	0.0701684	0.0969638	0.10489	0.0841036	0.0830603	0.0980769	0.0895438	0.0116219	0.00474462
	594.114	0.0745438	0.0831416	0.116423	0.077724	0.0913646	0.0795005	0.0871163	0.0141246	0.00576634
	594.739	0.0627018	0.105229	0.132115	0.084263	0.0876892	0.0767062	0.0914507	0.0221853	0.0090571
	595.365	0.0713223	0.0997422	0.113156	0.0650181	0.0805985	0.0517934	0.0802718	0.0207541	0.00847281
	595.99	0.0699733	0.103354	0.106375	0.102976	0.0794542	0.0630887	0.0875369	0.0173923	0.00710037
	596.615	0.0799082	0.10002	0.109939	0.0727267	0.0822975	0.0729279	0.0863032	0.0139461	0.00569346
	597.24	0.0698488	0.086545	0.0916239	0.0713976	0.105009	0.151484	0.0959846	0.02756	0.0112513
	597.865	0.055762	0.0971028	0.119641	0.0792126	0.0939478	0.0928424	0.0897514	0.0193258	0.00788974
	598.49	0.0715023	0.0706391	0.0829614	0.0786278	0.0898563	0.0708026	0.0773983	0.00720663	0.0029421
	599.116	0.0622757	0.0725145	0.0998409	0.0341305	0.0775819	0.0769029	0.0705411	0.0197757	0.00807339
	599.741	0.0585394	0.0776545	0.0937029	0.0695901	0.0811359	0.0848923	0.0775859	0.0111986	0.00457181
	600.366	0.061911	0.0817524	0.118948	0.0445504	0.0776165	0.0903629	0.0791902	0.0231409	0.00944724
	600.991	0.0600114	0.0734869	0.0919209	0.0988828	0.0848286	0.0903629	0.0832489	0.0129615	0.00529152
	601.616	0.0640523	0.0795299	0.0852385	0.0706533	0.0891628	0.0815864	0.0783705	0.00856246	0.00349561
	602.242	0.0523903	0.0680691	0.0653396	0.0501325	0.0874465	0.0445124	0.0613151	0.0143277	0.00584925
	602.867	0.0532201	0.0866145	0.089347	0.050611	0.0777726	0.0632855	0.0701418	0.0153472	0.00626547
	603.492	0.0647755	0.0927269	0.0634091	0.0889945	0.0688615	0.0373101	0.0693463	0.0183276	0.0074822
	604.117	0.0601509	0.0864061	0.109889	0.0735772	0.0812573	0.0380185	0.0748832	0.0222732	0.00909301
	604.742	0.0400906	0.0782101	0.0762791	0.0534818	0.0724329	0.0704878	0.0651637	0.0137845	0.00562749
	605.368	0.0557935	0.0582755	0.0599442	0.0655497	0.0762123	0.0843807	0.0666926	0.0103278	0.0042163
	605.993	0.0551587	0.0900874	0.084496	0.0527906	0.0727276	0.0574214	0.0687803	0.0146447	0.00597866
	606.618	0.0574635	0.0738341	0.0805855	0.0615093	0.0788995	0.0617506	0.0690071	0.00910445	0.00371688
	607.243	0.0555864	0.0831416	0.0953364	0.0837846	0.0720341	0.0503372	0.0733701	0.0159949	0.00652989
	607.869	0.0434878	0.0679303	0.0862779	0.0644865	0.084742	0.0629707	0.0683159	0.0144469	0.0058979
	608.494	0.0540634	0.0900875	0.0677156	0.0589575	0.0666597	0.0844594	0.0703239	0.0129373	0.00528163
	609.119	0.0493188	0.0923796	0.0984054	0.036576	0.06796	0.0390419	0.0639469	0.024479	0.0099935
	609.744	0.0530851	0.0838362	0.0938514	0.0578943	0.062759	0.0637578	0.0691973	0.0146089	0.00596407
	610.369	0.0631475	0.0494544	0.0699926	0.0928222	0.0729183	0.0237715	0.0620177	0.0214213	0.0087452
	610.995	0.045455	0.0836279	0.077566	0.0602866	0.066157	0.072928	0.0676701	0.0124535	0.00508413
	611.62	0.0618825	0.0702224	0.0862779	0.0361507	0.0660876	0.0428988	0.0605867	0.0168068	0.00686133
	612.245	0.0490802	0.0691805	0.071527	0.0324824	0.0806158	0.0704878	0.062229	0.0163238	0.00666418
	612.87	0.0490727	0.0818914	0.0835555	0.0273257	0.0700231	0.0608848	0.0621255	0.0195587	0.00798479
	613.495	0.0393554	0.0525105	0.0740515	0.0391278	0.0640419	0.0551387	0.0540376	0.0125303	0.00511548
	614.12	0.0521052	0.0786268	0.07717	0.0174905	0.0648047	0.0892216	0.0632365	0.0235417	0.00961088
	614.746	0.0366605	0.0530661	0.0771205	0.013716	0.0676653	0.0631675	0.0518993	0.0212258	0.00866538
	615.371	0.0372802	0.0600814	0.0617756	0.034609	0.059517	0.035972	0.0482059	0.0122951	0.00501946
	615.996	0.0435793	0.0648741	0.078061	0.0380114	0.0559803	0.0523444	0.0554751	0.0132603	0.00541349
	616.621	0.0448578	0.0535524	0.0669235	0.0333331	0.064666	0.0623016	0.0542724	0.0119733	0.00488807
	617.246	0.0411185	0.0740426	0.0883074	0.047687	0.0641979	0.0811141	0.0660779	0.0170705	0.00696899
	617.872	0.0461467	0.0626515	0.0479652	0.0455073	0.066157	0.0389237	0.0512252	0.00978058	0.0039929
	618.497	0.0406593	0.068347	0.073804	0.0234448	0.049375	0.0277071	0.0472229	0.0189154	0.00772219
	619.122	0.0376628	0.0639711	0.0660326	0.032004	0.057766	0.0408522	0.0497148	0.0133654	0.0054564
	619.747	0.0388737	0.0770988	0.0971184	0.0515147	0.054576	0.0252276	0.0574015	0.0237574	0.00969892
	620.372	0.0323405	0.0606371	0.0384613	0.0591171	0.0540559	0.048881	0.0489155	0.0104237	0.00425544
	620.998	0.0318258	0.0699445	0.071626	0.0144603	0.0639378	0.0435678	0.0492271	0.0211774	0.00864563
	621.623	0.0379554	0.0686249	0.0631121	0.0396062	0.0520449	0.0568311	0.0530291	0.0113116	0.00461792
	622.248	0.0308505	0.0481346	0.0875155	0.0182349	0.0639552	0.0463228	0.0491689	0.0223262	0.00911461
	622.873	0.0366259	0.0680691	0.077071	0.052578	0.0626029	0.0568704	0.0589696	0.0127028	0.00518588
	623.498	0.0434398	0.065013	0.0818725	0.0207867	0.0482134	0.0526592	0.0519974	0.018815	0.00768119
	624.124	0.0296426	0.0496627	0.0661811	0.0441251	0.040672	0.0285729	0.0431427	0.0127467	0.00520384
	624.749	0.036623	0.05001	0.0838525	0.000691063	0.0494097	0.00613964	0.0377876	0.0282416	0.0115296
	625.374	0.0276349	0.0599425	0.0771701	0.0395	0.0549401	0.0416787	0.0501444	0.0160262	0.00654267
	625.999	0.035223	0.0569558	0.091426	0.0302497	0.046133	0.00440791	0.0440659	0.0266309	0.010872
	626.625	0.0304903	0.0488986	0.0523706	0.0465706	0.0496177	0.0428201	0.045128	0.00717054	0.00292736
	627.25	0.0356311	0.0523021	0.0915745	0.0258902	0.0451622	0.0250702	0.0459384	0.0226105	0.00923069
	627.875	0.0221535	0.0450785	0.074893	0.027751	0.0499298	0.0318002	0.0419343	0.0175843	0.00717875
	628.5	0.0349544	0.0652909	0.0658345	0.0128123	0.0403773	0.00602157	0.0375485	0.023059	0.00941379
	629.125	0.0270857	0.0605677	0.0597956	0.0339178	0.0342747	0.0352636	0.0418175	0.0132543	0.00541105
	629.75	0.0351989	0.0732091	0.0579642	0.0281231	0.0467398	0.0395141	0.0467915	0.0150476	0.00614315
	630.376	0.0350894	0.05258	0.0880599	0.0285484	0.0417295	0.0130271	0.0431724	0.0234287	0.00956471
	631.001	0.0331088	0.0586228	0.0690521	0.035619	0.038869	0.0153097	0.0417635	0.0175582	0.0071681
	631.626	0.0233269	0.0456341	0.0690521	0.0227005	0.0411748	0.0294781	0.0385611	0.0160867	0.00656738
	632.251	0.0301092	0.0554972	0.0694976	0.0517805	0.0481267	0.0144045	0.0449026	0.0179064	0.00731026
	632.876	0.0243788	0.0640406	0.0590532	0.0161614	0.0380715	0.00968174	0.0352312	0.020574	0.00839931
	633.502	0.0309466	0.0659854	0.0574691	0.0241359	0.0355923	0.0228268	0.0394927	0.0164664	0.00672236
	634.127	0.0327291	0.0702224	0.0747445	0.0385962	0.046029	0.0328235	0.0491908	0.0171096	0.00698498
	634.752	0.0285097	0.0520244	0.063607	0.0105794	0.0327144	0.0403799	0.0379691	0.0169703	0.00692811
	635.377	0.0288833	0.0527189	0.0657851	0.0171184	0.0410014	0.00460473	0.0350186	0.0207314	0.00846354
	636.003	0.0333189	0.046676	0.0565287	0.0102073	0.0330785	0.0593892	0.0398664	0.0167021	0.00681859
	636.628	0.0235355	0.0344514	0.0611816	0.00659221	0.0405853	0.00196787	0.0280523	0.0202357	0.0082612
	637.253	0.0263579	0.0536219	0.0761306	0.0220626	0.0406893	0.0197964	0.0397764	0.0200299	0.00817719
	637.878	0.0230928	0.0382021	0.0692006	0.0150451	0.0346561	0.00023614	0.0300721	0.0215362	0.00879212
	638.503	0.0326226	0.0347986	0.0696461	0.014035	0.0419375	0.0500223	0.0405103	0.0170156	0.0069466
	639.129	0.0284812	0.0586923	0.0719726	0.0263688	0.0323157	0.0194028	0.0395389	0.019027	0.00776774
	639.754	0.0260413	0.0457035	0.0537072	0.0132906	0.0295591	0.0402226	0.0347541	0.0133703	0.00545841
	640.379	0.0207985	0.0426475	0.0618747	0.000425276	0.0302006	0.0154672	0.028569	0.0197241	0.00805233
	641.004	0.0216133	0.0525105	0.0474702	0.0376393	0.033824	0.00822553	0.0335471	0.0150216	0.00613253
	641.629	0.029548	0.046676	0.0620726	0.0358317	0.0393544	0.0281007	0.0402639	0.0115469	0.00471399
	642.255	0.0247299	0.0446616	0.0763285	0.0119084	0.0345001	0.0178286	0.0349929	0.021351	0.00871652
	642.88	0.0218264	0.0435504	0.0589046	-0.00574158	0.0282762	0.0257786	0.0287658	0.0198956	0.00812234
	643.505	0.0219149	0.048343	0.0547961	0.0382772	0.0368579	0.0327842	0.0388289	0.0105852	0.0043214
	644.13	0.0194751	0.0262553	0.0652405	0.0404037	0.0388863	-0.00184974	0.0314019	0.0206418	0.00842699
	644.755	0.0294926	0.0426475	0.0654386	0.0399785	0.0262478	0.0172776	0.0368471	0.0153315	0.00625904
	645.38	0.0187039	0.0216015	0.076972	0.0192981	0.0314315	0.00629703	0.0290507	0.0226477	0.00924588
	646.006	0.0280805	0.0407721	0.0634091	0.00909084	0.0297325	0.036641	0.034621	0.0162744	0.00664399
	646.631	0.0201399	0.0397996	0.0903369	0.022541	0.0309634	0.0377037	0.0402474	0.0235218	0.00960274
	647.256	0.0213373	0.0200734	0.0681611	0.00308339	0.0279468	0.0382547	0.0298094	0.0201101	0.0082099
	647.881	0.0193536	0.0304228	0.0502421	0.00590107	0.0277734	-0.0031092	0.021764	0.0173119	0.00706755
	648.506	0.0290604	0.0247966	0.0643496	0.0133439	0.0257277	0.0155065	0.0287975	0.0168568	0.00688177
	649.132	0.0193941	0.040008	0.0596472	0.000212678	0.0377941	0.00779262	0.0274748	0.0203901	0.00832423
	649.757	0.0193566	0.039244	0.0710321	-0.000106299	0.0317609	0.0233779	0.0307775	0.0217259	0.00886955
	650.382	0.0164696	0.0284779	0.0390552	0.0195108	0.0222084	0.0368378	0.0270933	0.00850668	0.00347284
	651.007	0.0200993	0.0330622	0.086179	0.0148856	0.0191744	0.00444734	0.0296413	0.0266498	0.0108797
	651.632	0.0217874	0.0328538	0.0638051	0.0314192	0.027132	0.0382154	0.0358688	0.013475	0.00550113
	652.258	0.0165972	0.0311868	0.0674186	0.0146197	0.0187584	0.0395928	0.0313622	0.0183712	0.00750002
	652.883	0.0171854	0.0220878	0.0642011	-0.00382772	0.0247222	-0.00531315	0.0198426	0.023082	0.00942321
	653.508	0.0180826	0.0377159	0.0825655	0.0150983	0.0235086	-0.0144439	0.0270878	0.0293066	0.0119644
	654.133	0.020677	0.0254218	0.062419	0.0180754	0.0194171	0.0388844	0.0308158	0.015748	0.00642911
	654.759	0.0121511	0.0455646	0.0527667	0.0185006	0.0335986	0.0229843	0.0309277	0.0145396	0.00593578
	655.384	0.0180961	0.0178508	0.082714	0.00350874	0.0257104	0.0220004	0.0283134	0.0252823	0.0103215
	656.009	0.0172634	0.0304228	0.0537072	0.0116958	0.027132	0.0355785	0.0292999	0.0135147	0.00551734
	656.634	0.0094862	0.026811	0.074002	0.0191918	0.0241501	0.0154278	0.0281781	0.0212549	0.00867729
	657.259	0.0129074	0.0364656	0.0638546	0.0113769	0.0213589	0.0258967	0.0286433	0.0178297	0.00727893
	657.885	0.0205975	0.015003	0.0674186	0.0122806	0.0182382	0.0321544	0.0276154	0.0188693	0.00770336
	658.51	0.0149601	0.0388272	0.0522221	0.0107388	0.0176835	0.028691	0.0271871	0.0145767	0.00595089
	659.135	0.0130604	0.0188231	0.0420252	0.00191386	0.0246355	0.00783194	0.0180484	0.0129644	0.0052927
	659.76	0.0130109	0.0357015	0.0644486	-0.0145666	0.0218096	-0.0167659	0.017273	0.0282144	0.0115185
	660.385	0.0104901	0.0288251	0.0664286	0.00154169	0.0229192	0.022394	0.0254331	0.0204197	0.00833631
	661.01	0.00872997	0.0293809	0.083902	0.0191917	0.0204747	0.0109018	0.0287635	0.0255647	0.0104368
	661.636	0.0127648	0.0230601	0.0612807	0.0200955	0.0150309	0.0338074	0.0276733	0.0164716	0.00672449
	662.261	0.0203139	0.0134749	0.0669235	-0.000318977	0.026976	0.00110201	0.0214119	0.0225507	0.00920627
	662.886	0.0122487	0.0326455	0.0462327	0.0132375	0.00861635	0.000865867	0.0189744	0.0155095	0.00633173
	663.511	0.00977134	0.0225045	0.0442527	0.0203613	0.0231965	-0.0139716	0.0176858	0.0174708	0.00713243
	664.136	0.0131265	0.0329233	0.0451437	-0.00361504	0.0162965	-0.0011807	0.0171157	0.0174	0.00710351
	664.762	0.0123807	0.0186843	0.0488562	-0.017331	0.0212028	-0.0167659	0.0111712	0.0229912	0.0093861
	665.387	0.00928815	0.0199346	0.0725171	-0.00770863	0.0196599	0.00610032	0.0199652	0.025278	0.0103197
	666.012	0.0138392	0.0129886	0.0432627	0.0119616	0.0210815	0.00334534	0.0177465	0.0125231	0.00511252
	666.637	0.00780114	0.0196566	0.0515292	0.0171184	0.0264212	0.0201113	0.023773	0.013584	0.00554566
	667.263	0.0130499	0.0346596	0.0635576	0.0182349	0.0213762	0.0249915	0.0293116	0.0166841	0.00681126
	667.888	0.011788	0.0202124	0.0556871	-0.00223284	0.0162965	0.0149161	0.0194446	0.0176685	0.00721315
	668.513	0.0188599	0.025769	0.0386098	0.00643264	0.0210295	-0.00401438	0.0177811	0.013621	0.00556074
	669.138	0.00756406	0.038341	0.0435597	0.0124933	0.0148229	0.00334534	0.020021	0.0153114	0.00625085
	669.763	0.00688734	0.0156281	0.0548951	0.0173842	0.0274441	-0.00106263	0.020196	0.0178624	0.00729228
	670.389	0.00894306	0.0234769	0.0601421	0.0156299	0.016678	-3.93764e-05	0.0208051	0.0190331	0.00777023
	671.014	0.0112103	0.048343	0.0654881	-0.00111642	0.0168686	0.0137748	0.0257614	0.023256	0.00949422
	671.639	0.0103535	0.0288251	0.0300959	0.0095693	0.0188103	0.00881593	0.017745	0.00892237	0.00364254
	672.264	0.0108787	0.020907	0.0701905	0.0198297	0.0149269	0.00991788	0.0244418	0.0208652	0.00851819
	672.889	0.0127709	0.0209764	0.0290564	0.00499733	0.00625857	0.00102325	0.0125138	0.00977237	0.00398955
	673.514	0.00716792	0.0156976	0.0454902	-0.00473154	0.0121184	-0.00676931	0.0114955	0.0172691	0.00705008
	674.14	0.00818526	0.0184065	0.0400453	0.00935662	0.0178742	-0.0268413	0.0111711	0.0199506	0.00814478
	674.765	0.00875695	0.0252829	0.0455397	0.0138223	0.0146149	0.0183009	0.0210529	0.0120415	0.00491593
	675.39	0.00937367	0.0127109	0.0241064	-0.00154169	0.0128292	0.0316428	0.0148535	0.0106067	0.00433017
	676.015	0.0119246	0.0213237	0.0532122	0.00451886	0.0110782	-0.000275457	0.0169637	0.017536	0.00715902
	676.64	0.0157794	0.0294504	0.0348973	0.00340244	0.0123611	0.0194029	0.0192156	0.0104845	0.00428028
	677.266	0.00769462	0.0156975	0.0418272	-0.0124933	0.0109048	-0.0133026	0.00838804	0.0186411	0.00761018
	677.891	0.00798121	0.0223655	0.0273238	0.004253	0.0128812	0.0276284	0.0170722	0.00921132	0.00376051
	678.516	0.0135991	0.0316036	0.0486087	0.000744332	0.0104887	0.0121612	0.0195343	0.0158927	0.00648816
	679.141	0.00811176	0.0235464	0.0449458	0.00265819	0.0118063	-0.00149559	0.0149288	0.0155554	0.00635048
	679.766	0.00788367	0.00368126	0.0320263	0.014354	0.00558244	-0.0117677	0.00862665	0.0131057	0.00535036
	680.392	0.0093392	0.0288252	0.0259379	0.00451886	0.0137307	-0.0175924	0.0107932	0.0153317	0.00625915
	681.017	0.0128234	0.0185454	0.0218294	0.0097819	0.00556509	-0.00901264	0.00992208	0.0100174	0.00408958
	681.642	0.00315704	0.0293114	0.0428667	-0.000637953	0.0153603	0.0226301	0.0187813	0.0149373	0.00609811
	682.267	0.00477465	0.019101	0.0369763	0.0135565	0.00861635	0.0153097	0.0163891	0.0102931	0.00420213
	682.892	0.00669228	0.0113912	0.0254923	0.00951611	0.0153777	-0.00594288	0.0104211	0.00944416	0.00385556
	683.518	0.0121676	0.0232686	0.0305413	0.000318977	0.00865104	-0.00417177	0.011796	0.0121087	0.00494337
	684.143	0.00880049	0.0122246	0.0255418	-0.00909084	0.0158284	0.00854036	0.0103075	0.0103917	0.00424241
	684.768	0.00994536	0.0197956	0.0192059	0.0191386	0.015343	0.00924884	0.0154462	0.0043849	0.00179013
	685.393	0.00710491	0.0114606	0.0240568	0.00095693	0.00690001	-0.00488019	0.00759985	0.00900327	0.00367557
	686.019	0.00659926	0.00680688	0.0414312	-0.000584764	0.0162445	0.00771393	0.0130352	0.0136056	0.00555445
	686.644	0.00860244	0.0288251	0.0335608	-0.0041467	0.0169207	-0.0277858	0.00932943	0.0207547	0.00847306
	687.269	0.0113109	0.0218794	0.0235123	0.00239233	0.00771485	-0.0126335	0.00902937	0.0122143	0.00498648
	687.894	0.00580396	0.00548724	0.00950394	0.000584764	0.00497563	0.000983878	0.00455657	0.00304449	0.00124291
	688.519	0.0113994	0.0176425	0.0241063	-0.00356185	0.0134706	-0.0110986	0.00865972	0.0121771	0.00497129
	689.144	0.00810874	0.00847399	0.0243043	0.0102604	0.018689	-0.0299898	0.0066411	0.0174049	0.0071055
	689.77	0.00725647	0.010141	0.0237598	0.00738965	0.00421283	0.0221185	0.0124797	0.00760646	0.00310532
	690.395	0.0143944	0.0171561	0.0277198	0.00223284	0.0102634	0.00613964	0.0129844	0.00822977	0.00335979
	691.02	0.00544234	0.0181286	0.0228193	0.0144071	0.0157244	-0.00342403	0.012183	0.0087081	0.00355507
	691.645	0.0124543	0.0231296	0.0307888	-0.0134501	0.00804426	-0.00735972	0.00893452	0.0155931	0.00636585
	692.27	0.00602903	0.0126414	0.0213839	-0.00558209	0.0114596	-0.0192454	0.00444772	0.0133391	0.00544568
	692.896	0.0100984	0.0278528	0.0137609	-0.00584788	0.00190703	-0.0184976	0.00487893	0.0147439	0.00601916
	693.521	0.000943834	-0.00263949	0.0303433	-0.000531654	0.00197639	0.00318789	0.0055467	0.0112422	0.00458962
	694.146	0.010082	0.0130581	0.0365803	-0.00101012	0.0117716	0.0207016	0.0151973	0.0114941	0.00469245
	694.771	0.000940811	0.0108355	0.0223738	-0.0202019	0.0108008	-0.0127122	0.00200614	0.0146123	0.00596543
	695.396	0.0110077	0.0115995	0.012573	0.00701749	0.0124998	0.0188125	0.0122517	0.00347798	0.00141988
	696.022	0.00367474	0.00694587	0.0319768	0.0106325	0.00624122	0.00972112	0.0115321	0.00942373	0.00384722
	696.647	0.00447601	0.0118079	-0.000742495	0.00409351	0.00787088	-0.000983937	0.00442031	0.00451761	0.00184431
	697.272	0.00635315	0.0227129	0.0282643	0.00643272	-3.46908e-05	-0.00397506	0.00995889	0.0116706	0.0047645
	697.897	0.0033236	0.0240326	0.0283138	0.010792	0.00296458	0.00259754	0.012004	0.0104699	0.0042743
	698.523	0.00841484	0.00409811	0.0283633	0.00978198	0.010038	0.0254244	0.0143534	0.00911778	0.00372232
	699.148	0.00667579	0.0196566	0.0302444	-0.00521001	0.00178569	-0.0293994	0.00395884	0.0189134	0.00772136
	699.773	0.00345266	0.00743211	0.0369268	-0.00478465	0.00839099	0.00448666	0.00931743	0.0130594	0.00533149
	700.398	0.0127709	0.008335	0.0270268	0.0187133	0.0110782	0.00173167	0.013276	0.00797308	0.003255
	pHo=5
	Wavelenght (nm)	Exp_1	Exp_2	Exp_3	Exp_4	Exp_5	Exp_6	Average	S.D.	S.E.M.
	405.929	-0.000397071	0.00567522	0.00732268	0.00132478	0.000302814	0.00601199	0.0033734	0.00304683	0.00124386
	406.554	0.000475862	0.0112103	0.0101815	0.00953819	-0.00127182	0.0045974	0.00578859	0.00486906	0.00198778
	407.179	0.00135648	0.00371338	0.00611894	0.00302043	0.00131218	0.000117882	0.00260655	0.00196489	0.000802164
	407.805	0.000248745	0.00280251	0.00521615	0.00312638	0.000969004	-0.00172892	0.00177231	0.00223532	0.000912566
	408.43	-3.70715e-05	0.00861793	0.0115357	0.00243756	-0.000767148	-0.00110025	0.00344779	0.0048949	0.00199834
	409.055	0.000710661	0.0116307	0.0075735	0.000370877	0.00209953	0.00624775	0.00477218	0.00408401	0.00166729
	409.68	-0.00217682	0.00917841	0.00336037	0.00254352	-0.00278589	-0.0116703	-0.000258457	0.00645885	0.00263681
	410.305	0.0035719	0.00595551	0.00757343	0.00826643	-0.000242251	-0.0161499	0.00149586	0.00838022	0.00342121
	410.93	0.000579355	0.00805745	0.0116862	-0.00789548	0.00113052	-0.0161106	-0.000425424	0.00934441	0.00381484
	411.556	-0.000807969	0.0140129	0.00787444	-0.00710071	0.000141323	-0.00231833	0.00196693	0.00697162	0.00284615
	412.181	-0.00260166	0.00749686	0.00687128	0.010492	-0.000363376	-0.000157137	0.003623	0.00485916	0.00198374
	412.806	-3.11227e-06	0.00931861	0.00867687	-0.00498108	-4.03954e-05	-0.00165035	0.00188676	0.00529626	0.00216219
	413.431	0.000165305	0.0162549	0.0142441	-0.00747158	-0.000524867	-0.00271129	0.0033261	0.008796	0.00359095
	414.057	0.00176277	0.0231914	0.00822547	-0.00196065	0.00942759	0.00479385	0.0075734	0.00796002	0.00324966
	414.682	0.0025337	0.020669	0.00526633	0.0127705	0.0127383	0.0103343	0.0107187	0.00583336	0.00238146
	415.307	0.0135877	0.0111402	0.00351083	-0.00227859	0.0157867	-0.00868402	0.00551047	0.00883825	0.0036082
	415.932	0.00960021	0.0341214	0.0287893	0.00800151	0.0138487	0.0251875	0.0199248	0.00994568	0.00406031
	416.557	0.020577	0.0314589	0.0192597	0.0047691	0.032179	0.0515537	0.0266329	0.0144	0.00587878
	417.183	0.0206542	0.0470133	0.0333033	0.00540498	0.0311091	0.0493533	0.0311397	0.0150588	0.00614774
	417.808	0.0310516	0.0458221	0.0258301	0.020719	0.0478446	0.0788238	0.0416819	0.0193148	0.00788523
	418.433	0.0426912	0.0793129	0.0191594	0.0312111	0.0498835	0.0730083	0.0492111	0.0213795	0.00872813
	419.058	0.0354686	0.0719562	0.0296921	0.0476379	0.0470371	0.0828711	0.0524438	0.0189942	0.00775436
	419.683	0.0495785	0.075109	0.060989	0.0204541	0.0644186	0.114778	0.0642212	0.0283284	0.011565
	420.308	0.0581961	0.111472	0.0910824	0.0697878	0.084263	0.128059	0.0904768	0.0236725	0.00966425
	420.934	0.0679215	0.109931	0.109389	0.0868506	0.0776414	0.150693	0.100404	0.0272561	0.0111273
	421.559	0.0747887	0.1409	0.114204	0.0862146	0.112627	0.148217	0.112825	0.0264499	0.0107981
	422.184	0.100351	0.122543	0.100461	0.106351	0.127545	0.149042	0.117716	0.0174627	0.0071291
	422.809	0.0969168	0.118899	0.114154	0.122725	0.133117	0.219693	0.134251	0.0397238	0.0162172
	423.435	0.120337	0.154422	0.145952	0.114352	0.170383	0.220636	0.154347	0.0353038	0.0144127
	424.06	0.151067	0.175862	0.156485	0.13629	0.148722	0.229202	0.166271	0.0305125	0.0124567
	424.685	0.154666	0.20655	0.163707	0.119227	0.160168	0.222011	0.171055	0.0341165	0.013928
	425.31	0.15621	0.210614	0.213512	0.191453	0.201775	0.24767	0.203539	0.0273445	0.0111633
	425.935	0.185676	0.178594	0.23859	0.190393	0.215402	0.274626	0.21388	0.0338997	0.0138395
	426.56	0.205042	0.24999	0.227555	0.202051	0.215179	0.322801	0.237103	0.0415101	0.0169464
	427.186	0.201861	0.230792	0.221487	0.238031	0.236074	0.335414	0.243943	0.0426457	0.01741
	427.811	0.220839	0.227359	0.277962	0.18361	0.262923	0.310659	0.247225	0.0415386	0.0169581
	428.436	0.248361	0.266525	0.296419	0.276714	0.300674	0.353843	0.290422	0.0333952	0.0136335
	429.061	0.27147	0.286143	0.334587	0.246297	0.287693	0.309716	0.289318	0.0278311	0.011362
	429.687	0.263209	0.254194	0.293861	0.233474	0.311757	0.320364	0.279476	0.0314665	0.0128461
	430.312	0.27745	0.28285	0.307002	0.212861	0.341937	0.368617	0.298453	0.0498291	0.0203426
	430.937	0.32249	0.329233	0.31302	0.286464	0.304853	0.340679	0.316123	0.0174725	0.00713313
	431.562	0.322085	0.362303	0.337747	0.267758	0.366869	0.326494	0.330543	0.0326855	0.0133438
	432.187	0.32581	0.343176	0.429281	0.274011	0.359965	0.389954	0.353699	0.0488279	0.0199339
	432.812	0.334987	0.311226	0.353345	0.248576	0.370483	0.353529	0.328691	0.0402789	0.0164438
	433.438	0.351899	0.382202	0.384542	0.317145	0.376781	0.358322	0.361815	0.0233169	0.00951907
	434.063	0.385239	0.344437	0.398686	0.340355	0.396908	0.342565	0.368032	0.0259515	0.0105947
	434.688	0.397544	0.35922	0.459474	0.316244	0.411786	0.455457	0.399954	0.0507209	0.0207067
	435.313	0.39337	0.395654	0.47758	0.350529	0.433609	0.451567	0.417051	0.0419786	0.0171377
	435.938	0.381313	0.405603	0.490721	0.383011	0.43912	0.396241	0.416002	0.0385308	0.0157302
	436.564	0.419067	0.439094	0.440215	0.387781	0.445701	0.498248	0.438351	0.0331034	0.0135144
	437.189	0.419933	0.423469	0.497593	0.409506	0.488358	0.542061	0.463487	0.0489352	0.0199777
	437.814	0.440353	0.462986	0.520263	0.368333	0.480283	0.524143	0.46606	0.0528122	0.0215605
	438.439	0.438979	0.47868	0.478634	0.411202	0.490195	0.498563	0.466042	0.0308195	0.012582
	439.065	0.494228	0.431247	0.470007	0.416289	0.536142	0.469132	0.469507	0.0394709	0.0161139
	439.69	0.463133	0.479311	0.541579	0.444003	0.538908	0.481666	0.491433	0.0366545	0.0149641
	440.315	0.442642	0.483375	0.534256	0.435418	0.588569	0.610236	0.515749	0.0676003	0.0275977
	440.94	0.482681	0.502572	0.559886	0.564449	0.551989	0.462255	0.520639	0.0400382	0.0163455
	441.565	0.482746	0.600873	0.619119	0.4989	0.568583	0.578998	0.558203	0.0504682	0.0206036
	442.19	0.525049	0.547904	0.603421	0.477704	0.582856	0.555618	0.548759	0.0404334	0.0165069
	442.816	0.561928	0.506916	0.654328	0.489256	0.589498	0.564813	0.561123	0.0541754	0.022117
	443.441	0.560715	0.617618	0.600311	0.583366	0.628298	0.649177	0.606581	0.0291254	0.0118904
	444.066	0.576137	0.58735	0.631558	0.535781	0.64245	0.668981	0.607043	0.0449298	0.0183425
	444.691	0.586924	0.588191	0.615006	0.516546	0.637786	0.587328	0.58863	0.0372222	0.0151959
	445.317	0.581835	0.550286	0.643846	0.529794	0.686156	0.669885	0.6103	0.059614	0.0243373
	445.942	0.628774	0.601573	0.639081	0.601012	0.677334	0.599509	0.624547	0.0280598	0.0114554
	446.567	0.630285	0.665052	0.744558	0.59884	0.644166	0.662026	0.657488	0.0447514	0.0182697
	447.192	0.615499	0.562337	0.701725	0.60488	0.713611	0.703049	0.650184	0.0583763	0.023832
	447.817	0.675387	0.622803	0.66125	0.584267	0.715286	0.762697	0.670282	0.0582043	0.0237618
	448.442	0.678886	0.631211	0.728458	0.59672	0.765554	0.701517	0.683724	0.0568105	0.0231928
	449.068	0.667387	0.68453	0.774902	0.617121	0.774577	0.723875	0.707065	0.0571759	0.023342
	449.693	0.719649	0.73967	0.781773	0.67753	0.752977	0.68741	0.726502	0.0362921	0.0148162
	450.318	0.696708	0.70639	0.771793	0.734176	0.751987	0.866119	0.754529	0.0560235	0.0228715
	450.943	0.748728	0.761951	0.76141	0.602178	0.802335	0.770635	0.741206	0.0643257	0.0262609
	451.568	0.728925	0.701065	0.800281	0.737885	0.776838	0.806628	0.758604	0.0387227	0.0158085
	452.194	0.775798	0.710313	0.790701	0.621042	0.804717	0.791775	0.749058	0.0648859	0.0264896
	452.819	0.759	0.710874	0.80309	0.684418	0.792867	0.793622	0.757312	0.0450019	0.0183719
	453.444	0.767438	0.747447	0.824907	0.705614	0.869782	0.76423	0.779903	0.0533492	0.0217797
	454.069	0.761571	0.819824	0.797873	0.691466	0.808432	0.795979	0.779191	0.0430951	0.0175935
	454.695	0.788771	0.737148	0.861119	0.727923	0.835019	0.880069	0.805008	0.0584437	0.0238595
	455.32	0.832596	0.810435	0.886147	0.78086	0.85666	0.877279	0.840663	0.0370149	0.0151113
	455.945	0.803866	0.78234	0.94207	0.804494	0.865482	0.88667	0.847487	0.055977	0.0228525
	456.57	0.842345	0.770569	0.925168	0.831836	0.888213	0.935198	0.865555	0.0571771	0.0233425
	457.195	0.806275	0.774352	0.924014	0.743078	0.910965	0.841875	0.833427	0.0666827	0.0272231
	457.82	0.836852	0.80497	0.912328	0.772594	0.874304	0.908125	0.851529	0.0516918	0.0211031
	458.446	0.853417	0.836079	0.870248	0.823305	0.925379	0.920777	0.871534	0.0392367	0.0160183
	459.071	0.833503	0.81562	0.97758	0.84927	0.928245	0.842111	0.874388	0.0582341	0.023774
	459.696	0.904714	0.892271	0.91624	0.827862	0.932141	0.98188	0.909185	0.0461533	0.018842
	460.321	0.893826	0.88099	0.9195	0.885144	0.925702	0.89834	0.900584	0.0166419	0.00679404
	460.947	0.893188	0.889538	0.902046	0.917097	0.943749	0.983098	0.921453	0.0329399	0.0134477
	461.572	0.901372	0.894653	0.978032	0.938611	0.940095	0.93567	0.931405	0.0276056	0.0112699
	462.197	0.911573	0.909226	0.955111	0.882972	0.93628	1.00066	0.932637	0.0378686	0.0154598
	462.822	0.894044	0.92415	0.918598	0.862518	0.988404	1.03182	0.936589	0.0570515	0.0232912
	463.447	0.918715	0.91343	0.99363	0.829717	0.989716	1.00369	0.941483	0.0615254	0.0251176
	464.072	0.908391	0.903131	0.927876	0.844607	1.00302	0.889931	0.912826	0.0477025	0.0194745
	464.698	0.919846	0.943768	0.985304	0.956893	0.986971	0.940149	0.955489	0.0242389	0.00989549
	465.323	0.912506	0.985877	0.984703	0.957847	0.967813	0.900855	0.9516	0.0333564	0.0136177
	465.948	0.934608	0.901519	0.968302	0.889489	0.998841	1.05269	0.957575	0.0565239	0.0230758
	466.573	0.954301	0.948532	0.972515	0.830459	1.00839	0.973353	0.947925	0.0558967	0.0228197
	467.199	0.933028	0.896405	0.941218	0.951382	0.984084	1.01717	0.95388	0.0383453	0.0156544
	467.824	0.950627	0.98938	1.02387	0.936545	1.03326	1.04302	0.996118	0.0408528	0.0166781
	468.449	0.957132	0.983495	0.946936	0.921019	1.03833	0.99076	0.972945	0.0372526	0.0152083
	469.074	1.01107	1.01797	0.956916	1.03654	1.03409	0.974374	1.00516	0.0297084	0.0121284
	469.699	0.978331	0.964227	1.0335	1.02626	1.00942	0.997479	1.00154	0.0246377	0.0100583
	470.325	0.994864	1.01713	1.01369	0.97528	0.985073	1.02078	1.00114	0.0171518	0.00700221
	470.95	0.954382	0.990781	1.05793	0.975704	1.04178	1.01273	1.00555	0.0361359	0.0147524
	471.575	1.00549	0.93508	1.01515	0.945447	0.958829	1.0673	0.987882	0.0461774	0.0188519
	472.2	0.994538	0.905022	0.946384	0.966749	0.985417	1.05921	0.97622	0.0471814	0.0192617
	472.825	0.976782	1.03191	0.985204	0.918369	1.0286	0.955002	0.982644	0.0397388	0.0162233
	473.45	0.980434	1.01159	1.02723	0.972101	0.977402	0.941996	0.985126	0.0276435	0.0112854
	474.076	1.00222	1.0186	0.969205	0.965	0.999467	1.03375	0.998039	0.0246313	0.0100557
	474.701	1.03181	1.02091	0.971712	1.03415	1.03962	1.05905	1.02621	0.0269292	0.0109938
	475.326	1.0063	1.05489	1.04419	0.983812	0.994804	1.10377	1.03129	0.0412043	0.0168216
	475.951	1.00316	1.08025	1.05507	1.0457	1.01477	0.980779	1.02996	0.0336042	0.0137188
	476.577	0.995264	1.11178	0.958722	1.08237	0.987718	1.05764	1.03225	0.0551358	0.0225091
	477.202	1.00734	1.01881	0.942722	0.989958	0.995692	0.927575	0.980349	0.0335065	0.013679
	477.827	0.986244	1.01425	0.998596	0.97687	1.0011	0.996654	0.99562	0.0117376	0.00479186
	478.452	0.998806	1.0495	1.03917	1.05376	1.02222	1.02797	1.0319	0.01846	0.00753625
	479.077	1.02521	1.04088	0.988865	1.01439	1.02626	1.06385	1.02657	0.022972	0.00937828
	479.702	1.02434	1.01537	1.01174	1.04131	1.00595	1.06459	1.02722	0.0201497	0.00822609
	480.328	0.991662	0.977259	0.970208	1.09785	1.05603	0.953588	1.00777	0.0516075	0.0210687
	480.953	1.01734	1.03569	1.02277	1.08444	1.03754	1.00003	1.03297	0.0261747	0.0106858
	481.578	1.00286	1.0476	1.03526	1.0873	0.932343	0.956456	1.0103	0.0531904	0.0217149
	482.203	0.997862	1.02595	1.02237	1.00919	0.95996	0.998501	1.00231	0.0217432	0.00887662
	482.829	0.998718	1.0303	0.984903	0.998702	0.960545	1.15693	1.02168	0.0639183	0.0260945
	483.454	1.02107	0.964087	0.960628	0.962139	0.987536	0.988284	0.980625	0.0214389	0.00875241
	484.079	1.00731	1.00872	0.936453	1.0076	0.954792	0.923017	0.972983	0.0360929	0.0147348
	484.704	0.997668	0.999119	0.938058	0.96394	0.982348	0.980779	0.976985	0.0210013	0.00857373
	485.329	0.997244	1.02371	1.04604	1.00692	0.951925	0.950287	0.996021	0.0351785	0.0143615
	485.954	1.01979	0.947131	1.02884	0.906605	0.96535	1.02023	0.981325	0.0452004	0.018453
	486.58	0.976884	0.983144	1.00095	1.01216	0.909027	1.00946	0.981939	0.0350613	0.0143137
	487.205	1.01255	0.971584	1.02784	1.04295	0.975787	0.972803	1.00058	0.0286016	0.0116765
	487.83	0.984202	1.00262	0.976778	1.05233	0.948413	0.996379	0.993454	0.0314937	0.0128573
	488.455	1.0157	0.999189	0.930785	0.983547	0.972799	0.937084	0.973185	0.0308018	0.0125748
	489.08	0.986424	0.979221	1.01876	0.922131	0.912358	1.10448	0.987228	0.0640955	0.0261669
	489.706	0.975951	1.02848	0.972465	0.984024	0.918797	0.950248	0.97166	0.0332989	0.0135942
	490.331	0.952948	0.926322	0.963838	0.953342	0.899397	0.896061	0.931985	0.0267542	0.0109224
	490.956	0.961651	1.00409	1.00562	0.93718	0.88896	0.966437	0.960657	0.0400711	0.016359
	491.581	0.948953	0.917284	0.945732	0.962987	0.899922	0.906671	0.930258	0.02347	0.00958159
	492.207	0.938657	0.952316	0.966446	0.995469	0.902405	0.981015	0.956051	0.0302199	0.0123372
	492.832	0.94015	0.938653	0.992276	0.927324	0.914134	1.03874	0.958546	0.0433009	0.0176775
	493.457	0.945623	0.938583	0.884392	0.904433	0.876949	0.970563	0.92009	0.0339661	0.0138666
	494.082	0.899144	0.943698	0.924265	0.950269	0.85448	0.852681	0.904089	0.0392362	0.0160181
	494.707	0.905716	0.90271	0.891514	0.824206	0.888859	1.00157	0.902429	0.0520595	0.0212532
	495.332	0.914658	0.915882	0.911175	0.873169	0.862999	0.88054	0.893071	0.0214925	0.00877429
	495.958	0.875485	0.938513	0.832029	0.930186	0.833848	0.860068	0.878355	0.0423773	0.0173005
	496.583	0.894548	0.925131	0.923613	0.854993	0.805545	0.863447	0.87788	0.0419652	0.0171322
	497.208	0.915894	0.844487	0.852994	0.904856	0.840631	0.911543	0.878401	0.0327269	0.0133607
	497.833	0.885796	0.854996	0.887501	0.916514	0.835584	0.888674	0.878178	0.0260653	0.0106411
	498.459	0.879605	0.85871	0.893971	0.913653	0.808573	0.910089	0.877434	0.0359369	0.0146712
	499.084	0.914374	0.886455	0.828067	0.955674	0.817658	0.778297	0.863421	0.0608655	0.0248482
	499.709	0.810032	0.900118	0.863276	0.832366	0.797208	0.786038	0.831506	0.0396285	0.0161783
	500.334	0.865418	0.856258	0.829522	0.769626	0.783298	0.771696	0.812636	0.039498	0.016125
	500.959	0.826325	0.841264	0.830826	0.852979	0.742842	0.778572	0.812135	0.0387198	0.0158073
	501.584	0.822267	0.875946	0.799328	0.846991	0.746395	0.866316	0.826207	0.0440124	0.017968
	502.21	0.816274	0.845678	0.73563	0.875818	0.747284	0.808829	0.804919	0.0499248	0.0203817
	502.835	0.82241	0.823467	0.839352	0.800254	0.78562	0.75586	0.804494	0.0277954	0.0113474
	503.46	0.784277	0.755925	0.826462	0.758551	0.738179	0.803917	0.777885	0.0303062	0.0123725
	504.085	0.787694	0.805321	0.821998	0.853403	0.685066	0.769142	0.787104	0.0527255	0.0215251
	504.711	0.794859	0.784301	0.828067	0.884985	0.720293	0.719985	0.788748	0.0581366	0.0237342
	505.336	0.772881	0.796843	0.783378	0.7408	0.671701	0.71303	0.746439	0.0434702	0.0177466
	505.961	0.802315	0.790537	0.802036	0.790398	0.674366	0.785763	0.774236	0.0450834	0.0184052
	506.586	0.756978	0.768817	0.746715	0.732904	0.680443	0.690907	0.729461	0.0329262	0.0134421
	507.211	0.745836	0.740371	0.820343	0.766182	0.663626	0.697273	0.738938	0.0497099	0.020294
	507.837	0.715799	0.721944	0.723092	0.767613	0.664918	0.700613	0.715663	0.0305367	0.0124665
	508.462	0.703166	0.732804	0.755793	0.698726	0.640108	0.763287	0.715647	0.0414807	0.0169344
	509.087	0.687737	0.734205	0.756696	0.681875	0.646245	0.639825	0.691097	0.0426192	0.0173992
	509.712	0.706795	0.777225	0.707794	0.749702	0.608777	0.650591	0.700147	0.056721	0.0231563
	510.337	0.697325	0.741912	0.747317	0.75304	0.671782	0.654167	0.710924	0.0387231	0.0158086
	510.962	0.701277	0.734976	0.656987	0.684312	0.629893	0.718217	0.68761	0.0357001	0.0145745
	511.588	0.681211	0.731613	0.664861	0.576902	0.617114	0.678647	0.658391	0.0494615	0.0201926
	512.213	0.660532	0.678434	0.773949	0.613147	0.573166	0.614009	0.652206	0.0643048	0.0262523
	512.838	0.670712	0.671007	0.755693	0.589619	0.577849	0.630512	0.649232	0.0595385	0.0243065
	513.463	0.633905	0.650759	0.651118	0.67949	0.589538	0.649766	0.642429	0.0272102	0.0111085
	514.088	0.63319	0.647045	0.666667	0.678007	0.558066	0.581198	0.627362	0.0437116	0.0178452
	514.714	0.634985	0.623153	0.670178	0.690618	0.585198	0.65067	0.642467	0.0338193	0.0138067
	515.339	0.596799	0.665542	0.627947	0.605834	0.576093	0.620296	0.615418	0.027923	0.0113995
	515.964	0.592149	0.600592	0.629301	0.62189	0.506466	0.609411	0.593302	0.0407588	0.0166397
	516.589	0.66328	0.624134	0.605627	0.627348	0.575043	0.621317	0.619458	0.026369	0.0107651
	517.215	0.588458	0.63065	0.580299	0.596826	0.547891	0.656761	0.600147	0.0351375	0.0143448
	517.84	0.56909	0.585178	0.595245	0.55862	0.514238	0.534045	0.559403	0.0280664	0.0114581
	518.465	0.608316	0.588752	0.597101	0.625864	0.504871	0.68576	0.601777	0.0536319	0.0218951
	519.09	0.584302	0.581745	0.525078	0.545267	0.484341	0.527287	0.541336	0.0346521	0.0141467
	519.715	0.56812	0.579433	0.590731	0.475214	0.491547	0.577937	0.547164	0.0458176	0.018705
	520.341	0.569732	0.606758	0.485204	0.496993	0.460983	0.479269	0.51649	0.0529281	0.0216078
	520.966	0.523002	0.607389	0.59349	0.575259	0.489993	0.602731	0.565311	0.0438305	0.0178937
	521.591	0.542074	0.578662	0.563597	0.593488	0.469846	0.53715	0.547469	0.0398158	0.0162547
	522.216	0.533823	0.512031	0.502959	0.519673	0.50259	0.598448	0.528254	0.03315	0.0135334
	522.841	0.516031	0.483935	0.582305	0.544896	0.434699	0.420761	0.497104	0.0574422	0.0234507
	523.466	0.504226	0.57607	0.574682	0.540392	0.458561	0.441547	0.515913	0.0526433	0.0214915
	524.092	0.513663	0.509439	0.531096	0.504782	0.438878	0.570392	0.511375	0.0391157	0.0159689
	524.717	0.490636	0.465088	0.507122	0.546009	0.451132	0.500528	0.493419	0.0305575	0.0124751
	525.342	0.514798	0.494375	0.559484	0.503776	0.444611	0.500881	0.502988	0.0337105	0.0137623
	525.967	0.507534	0.526184	0.501655	0.478552	0.413462	0.492197	0.486597	0.0357702	0.0146031
	526.592	0.483259	0.537675	0.534758	0.491588	0.435527	0.472747	0.492592	0.0354701	0.0144806
	527.218	0.458014	0.479731	0.548701	0.491959	0.418186	0.396595	0.465531	0.0497788	0.0203221
	527.843	0.471128	0.497948	0.504614	0.454336	0.395495	0.416595	0.456686	0.0399278	0.0163004
	528.468	0.420958	0.477629	0.455362	0.471929	0.402581	0.386693	0.435858	0.0345759	0.0141156
	529.093	0.453577	0.460113	0.459224	0.483109	0.393456	0.401467	0.441824	0.0327821	0.0133832
	529.718	0.448887	0.451635	0.479185	0.403783	0.378618	0.462137	0.437374	0.034828	0.0142185
	530.344	0.432603	0.4674	0.434196	0.426092	0.385038	0.351014	0.416057	0.0377103	0.0153952
	530.969	0.414084	0.450935	0.470458	0.410513	0.387137	0.394748	0.421313	0.0298197	0.0121739
	531.594	0.431075	0.425151	0.451851	0.404631	0.358168	0.364806	0.405947	0.0343621	0.0140283
	532.219	0.388812	0.443648	0.475574	0.452163	0.383302	0.423668	0.427861	0.0332774	0.0135854
	532.845	0.436826	0.454858	0.413432	0.448666	0.357098	0.427794	0.423112	0.0324611	0.0132522
	533.47	0.415033	0.426833	0.427174	0.428318	0.342442	0.377184	0.40283	0.032331	0.0131991
	534.095	0.407269	0.390889	0.410172	0.396259	0.352152	0.387243	0.390664	0.0190722	0.00778621
	534.72	0.389699	0.393062	0.412077	0.368651	0.343169	0.346338	0.375499	0.0251349	0.0102613
	535.345	0.398955	0.374214	0.422209	0.420316	0.308951	0.431095	0.392623	0.0418377	0.0170802
	535.971	0.366573	0.420667	0.416541	0.323398	0.325545	0.359933	0.368776	0.0386983	0.0157985
	536.596	0.36494	0.427743	0.430886	0.415971	0.34008	0.356476	0.389349	0.0365424	0.0149184
	537.221	0.356021	0.383112	0.439914	0.327425	0.308184	0.287868	0.350421	0.0505548	0.0206389
	537.846	0.344168	0.378768	0.389257	0.395199	0.289005	0.296867	0.348877	0.0427817	0.0174655
	538.471	0.327155	0.364545	0.388003	0.311157	0.291892	0.343587	0.337723	0.0321449	0.0131231
	539.096	0.34488	0.381711	0.429732	0.265215	0.293467	0.358637	0.345607	0.0543635	0.0221938
	539.722	0.339764	0.340863	0.418497	0.329439	0.276166	0.276473	0.3302	0.047973	0.0195849
	540.347	0.331083	0.359991	0.369997	0.291021	0.268313	0.336396	0.326133	0.0360006	0.0146972
	540.972	0.338002	0.364826	0.395978	0.331028	0.29167	0.313684	0.339198	0.03381	0.0138029
	541.597	0.309869	0.322787	0.40014	0.385873	0.277176	0.309676	0.334254	0.0439577	0.0179456
	542.222	0.30332	0.339252	0.388404	0.269507	0.272149	0.325905	0.316423	0.0410799	0.0167708
	542.848	0.304313	0.325589	0.304093	0.273322	0.248105	0.310187	0.294268	0.0258251	0.010543
	543.473	0.31047	0.310245	0.372455	0.2685	0.271886	0.287082	0.30344	0.0349827	0.0142816
	544.098	0.31161	0.354386	0.400341	0.284609	0.265426	0.310109	0.32108	0.0447756	0.0182795
	544.723	0.299448	0.316341	0.363677	0.258379	0.254041	0.323626	0.302585	0.0380456	0.015532
	545.348	0.276166	0.31543	0.401444	0.291922	0.246834	0.240951	0.295458	0.0537774	0.0219545
	545.974	0.291259	0.28236	0.381232	0.24741	0.24748	0.23824	0.28133	0.0487052	0.0198838
	546.599	0.260442	0.330424	0.336443	0.304003	0.249175	0.287239	0.294621	0.0326776	0.0133406
	547.224	0.271661	0.305341	0.366988	0.220226	0.243543	0.236589	0.274058	0.0497547	0.0203123
	547.849	0.273392	0.287264	0.318889	0.227963	0.237103	0.227827	0.262073	0.0340356	0.013895
	548.475	0.245331	0.306041	0.324155	0.221604	0.228867	0.224762	0.25846	0.0410728	0.0167679
	549.1	0.255775	0.285933	0.284883	0.257372	0.214594	0.299263	0.266303	0.0279326	0.0114034
	549.725	0.264108	0.231423	0.282175	0.262777	0.212757	0.319028	0.262045	0.0342153	0.0139683
	550.35	0.24029	0.256786	0.276206	0.242058	0.217864	0.227159	0.243394	0.0190734	0.00778667
	550.975	0.232604	0.295952	0.312118	0.217365	0.218632	0.286886	0.260593	0.0387496	0.0158195
	551.601	0.239615	0.231493	0.254238	0.202846	0.20557	0.157215	0.215163	0.0316045	0.0129025
	552.226	0.239431	0.266385	0.308356	0.171052	0.197031	0.207551	0.231634	0.0458299	0.01871
	552.851	0.242135	0.230512	0.259906	0.193572	0.203612	0.200675	0.221735	0.024205	0.00988166
	553.476	0.203493	0.225958	0.286839	0.180537	0.212293	0.216982	0.221017	0.0326474	0.0133283
	554.101	0.22957	0.216499	0.271843	0.212384	0.189137	0.192109	0.21859	0.0275923	0.0112645
	554.726	0.202366	0.247888	0.275404	0.237236	0.191197	0.145466	0.216593	0.0423686	0.0172969
	555.352	0.21294	0.234015	0.241699	0.206661	0.193195	0.22095	0.218243	0.0163093	0.00665823
	555.977	0.210171	0.23892	0.240947	0.204647	0.157302	0.232739	0.214121	0.0289108	0.0118028
	556.602	0.210588	0.232754	0.260457	0.176457	0.181587	0.203111	0.210826	0.0289823	0.011832
	557.227	0.203304	0.200384	0.248671	0.167872	0.176217	0.111438	0.184648	0.041647	0.0170023
	557.852	0.201027	0.198422	0.230214	0.171423	0.178963	0.197295	0.196224	0.0186967	0.0076329
	558.478	0.188735	0.200805	0.184221	0.179795	0.156858	0.215606	0.18767	0.0181541	0.00741136
	559.103	0.17895	0.188964	0.186428	0.171105	0.158028	0.179299	0.177129	0.0102931	0.00420212
	559.728	0.18185	0.242633	0.259354	0.172906	0.182294	0.145938	0.197496	0.0400053	0.0163321
	560.353	0.185213	0.242983	0.228007	0.155367	0.156797	0.125387	0.182292	0.0416232	0.0169926
	560.978	0.180532	0.185601	0.189136	0.169568	0.154354	0.145506	0.170783	0.0161336	0.00658653
	561.604	0.176116	0.205149	0.207493	0.173065	0.152961	0.198238	0.185504	0.0197209	0.00805102
	562.229	0.16828	0.191346	0.197312	0.175238	0.138023	0.20484	0.179173	0.0222242	0.00907297
	562.854	0.182253	0.161639	0.231468	0.140635	0.122377	0.191441	0.171635	0.035525	0.014503
	563.479	0.15071	0.18518	0.252483	0.143126	0.136185	0.165271	0.172159	0.039298	0.0160433
	564.105	0.151907	0.179575	0.219531	0.136608	0.146037	0.132107	0.160961	0.0302964	0.0123684
	564.73	0.15819	0.19527	0.187381	0.138357	0.128676	0.184643	0.165419	0.0254219	0.0103784
	565.355	0.139375	0.165773	0.214164	0.147577	0.132087	0.149357	0.158055	0.0271308	0.0110761
	565.98	0.155232	0.176843	0.217374	0.134912	0.138648	0.16032	0.163888	0.0276672	0.0112951
	566.605	0.132407	0.149938	0.19019	0.128236	0.129786	0.140398	0.145159	0.0214422	0.00875373
	567.231	0.151034	0.158906	0.209299	0.140158	0.127464	0.178788	0.160942	0.0268076	0.0109441
	567.856	0.119831	0.140479	0.186929	0.100416	0.124255	0.129828	0.133623	0.0267198	0.0109083
	568.481	0.136255	0.127307	0.136624	0.113346	0.118622	0.147628	0.129964	0.0116032	0.004737
	569.106	0.141635	0.144613	0.196108	0.137668	0.117593	0.162992	0.150101	0.0244812	0.00999441
	569.731	0.132776	0.156174	0.160397	0.143709	0.119531	0.110652	0.137206	0.0181523	0.00741065
	570.356	0.121959	0.129899	0.20318	0.114829	0.109397	0.142048	0.136885	0.0314519	0.0128402
	570.982	0.138374	0.155613	0.162855	0.154466	0.106853	0.120711	0.139812	0.0202015	0.00824721
	571.607	0.123962	0.144963	0.175695	0.0928384	0.119288	0.153404	0.135025	0.0265842	0.0108529
	572.232	0.131154	0.164441	0.163607	0.131733	0.128131	0.114974	0.139007	0.0185405	0.00756915
	572.857	0.132155	0.126747	0.184673	0.128819	0.125567	0.086054	0.130669	0.0287342	0.0117307
	573.482	0.119579	0.134384	0.130053	0.100151	0.0983135	0.10633	0.114802	0.0141254	0.00576668
	574.108	0.124568	0.166823	0.175795	0.117055	0.109518	0.155251	0.141502	0.0255396	0.0104265
	574.733	0.114764	0.13004	0.184723	0.147683	0.107055	0.1202	0.134077	0.0260198	0.0106225
	575.358	0.114742	0.133823	0.151921	0.135389	0.118299	0.11521	0.128231	0.0135022	0.00551224
	575.983	0.113823	0.136766	0.162905	0.0976075	0.0934281	0.138787	0.123886	0.0245964	0.0100415
	576.609	0.1021	0.129199	0.181362	0.10439	0.101988	0.105465	0.120751	0.0287122	0.0117217
	577.234	0.100631	0.0968991	0.166015	0.110272	0.092338	0.0979207	0.110679	0.0253384	0.0103444
	577.859	0.127012	0.121632	0.16125	0.0699467	0.10546	0.113992	0.116549	0.0271869	0.011099
	578.484	0.112017	0.112453	0.156535	0.0860557	0.121287	0.0935592	0.113651	0.0226077	0.00922956
	579.109	0.0964858	0.106218	0.180008	0.0698938	0.0974051	0.101654	0.108611	0.0339688	0.0138677
	579.735	0.0914756	0.120511	0.139432	0.084784	0.0986971	0.109198	0.10735	0.0184481	0.0075314
	580.36	0.11392	0.105447	0.138228	0.153406	0.100998	0.128256	0.123376	0.0185194	0.00756052
	580.985	0.112105	0.129689	0.140084	0.117903	0.0971628	0.121104	0.119675	0.0134543	0.00549269
	581.61	0.106678	0.126676	0.130505	0.108576	0.0869883	0.0776057	0.106172	0.0191598	0.00782197
	582.235	0.107033	0.122262	0.140486	0.089818	0.0957497	0.0556797	0.101838	0.0266143	0.0108652
	582.861	0.103999	0.105377	0.133363	0.0914607	0.102735	0.0739514	0.101814	0.017782	0.00725947
	583.486	0.0987569	0.0933258	0.11626	0.0975546	0.095245	0.0858968	0.0978399	0.00921941	0.00376381
	584.111	0.0865858	0.115256	0.122781	0.0599316	0.0959314	0.0961526	0.0961064	0.0203204	0.00829576
	584.736	0.101306	0.114345	0.111345	0.0646477	0.0961938	0.113796	0.100272	0.017274	0.00705208
	585.361	0.0855724	0.102504	0.119621	0.125745	0.0891887	0.09741	0.10334	0.014826	0.0060527
	585.986	0.101743	0.0983705	0.145451	0.0807037	0.0913488	0.123737	0.106892	0.0215912	0.00881459
	586.612	0.0864623	0.113925	0.156285	0.13168	0.0935896	0.092616	0.112426	0.0248928	0.0101624
	587.237	0.076207	0.107128	0.149112	0.0621572	0.0821635	0.052654	0.0882371	0.0321211	0.0131134
	587.862	0.0746497	0.0824659	0.138078	0.0866386	0.0813358	0.095406	0.0930956	0.0210633	0.00859907
	588.487	0.0825165	0.112804	0.111395	0.0732322	0.0979502	0.080317	0.0930358	0.0153656	0.00627297
	589.112	0.0844631	0.107269	0.085515	0.0805448	0.104612	0.108373	0.0951294	0.0117728	0.00480622
	589.738	0.0849528	0.105867	0.142742	0.104019	0.0958305	0.0765841	0.101666	0.0210276	0.00858447
	590.363	0.0808835	0.08702	0.10964	0.0817635	0.0983741	0.0707686	0.0880749	0.0126708	0.00517282
	590.988	0.0826771	0.110842	0.112499	0.0613094	0.103421	0.0746194	0.0908946	0.0192754	0.00786915
	591.613	0.0699129	0.113224	0.112198	0.0996211	0.105339	0.0653067	0.0942669	0.0194249	0.00793018
	592.238	0.0754886	0.0874404	0.135219	0.0393715	0.0858578	0.0942664	0.086274	0.028217	0.0115196
	592.864	0.0796939	0.11911	0.128248	0.0862146	0.116947	0.0692361	0.0999081	0.022357	0.00912723
	593.489	0.0614405	0.0851984	0.095145	0.0619452	0.0971023	0.109395	0.0850377	0.0179401	0.00732402
	594.114	0.0753526	0.0623573	0.103922	0.063376	0.0946192	0.101143	0.0834617	0.0171772	0.00701255
	594.739	0.0732145	0.103625	0.135821	0.078955	0.0911268	0.100396	0.0971898	0.020364	0.00831357
	595.365	0.0677454	0.0917845	0.0865684	0.0669793	0.116906	0.070965	0.0834915	0.0176649	0.00721167
	595.99	0.080539	0.0829563	0.110994	0.0614153	0.100998	0.0807493	0.0862754	0.0159179	0.00649844
	596.615	0.0768836	0.0798035	0.0645501	0.0602496	0.0929638	0.039019	0.0689116	0.01707	0.00696881
	597.24	0.0668817	0.0668415	0.0895275	0.0914607	0.0921765	0.112145	0.0865055	0.015785	0.00644422
	597.865	0.0798824	0.081555	0.0849133	0.0863206	0.0766119	0.0393334	0.0747694	0.0161639	0.00659887
	598.49	0.0635771	0.0763002	0.0744308	0.0669793	0.0911671	0.0500607	0.0704192	0.0126113	0.00514855
	599.116	0.0718595	0.079313	0.0964991	0.0295154	0.094377	0.116664	0.0813713	0.0271641	0.0110897
	599.741	0.0550414	0.0681726	0.0905808	0.0633229	0.0981722	0.0710044	0.0743824	0.0151366	0.00617949
	600.366	0.0634798	0.0714657	0.0888755	0.0736031	0.0833343	0.089669	0.0784046	0.0096158	0.00392564
	600.991	0.0604548	0.0918545	0.123382	0.0703177	0.103522	0.0484496	0.0829968	0.0257978	0.0105319
	601.616	0.0598245	0.0745486	0.0503561	0.0750868	0.102795	0.0877043	0.0750526	0.0171842	0.00701543
	602.242	0.0654836	0.0915743	0.0824054	0.0921496	0.0711007	0.0731262	0.0793066	0.0101788	0.00415549
	602.867	0.0587245	0.0778415	0.0570268	0.0601436	0.0716861	0.0646387	0.0650102	0.0074864	0.00305631
	603.492	0.055457	0.0674721	0.0792456	0.0583419	0.092984	0.0754839	0.0714974	0.0128073	0.00522857
	604.117	0.0646385	0.0709752	0.0759856	0.0912487	0.0945586	0.0559154	0.0755537	0.0137445	0.00561118
	604.742	0.0554925	0.073848	0.0815528	0.0451474	0.0927821	0.063342	0.0686941	0.0159662	0.00651817
	605.368	0.0636219	0.0723766	0.087421	0.0606736	0.084808	0.0713973	0.0733831	0.00991095	0.00404613
	605.993	0.0577187	0.0679625	0.10006	0.0645418	0.0773386	0.0592161	0.0711397	0.014438	0.00589431
	606.618	0.053206	0.0819754	0.0661551	0.0914607	0.0705152	0.0765841	0.0733161	0.0120998	0.00493972
	607.243	0.0497531	0.0926252	0.079998	0.0729142	0.0936098	0.0497463	0.0731077	0.0179814	0.00734086
	607.869	0.0457563	0.0657905	0.0959976	0.0514002	0.0823451	0.0704935	0.0686305	0.0171692	0.00700931
	608.494	0.0472348	0.0699944	0.0773899	0.0334897	0.0862414	0.046249	0.0600999	0.0189107	0.00772025
	609.119	0.0427097	0.0499559	0.0645	0.0597727	0.0762081	0.0721045	0.0608752	0.0117244	0.00478646
	609.744	0.0468718	0.0987909	0.0954459	0.0532019	0.0721706	0.0675072	0.0723314	0.0194586	0.00794392
	610.369	0.0578377	0.0886315	0.0831077	0.0449885	0.07318	0.0598841	0.0679382	0.0151623	0.00619
	610.995	0.0463109	0.0766505	0.0557228	0.0713245	0.0715044	0.0564655	0.0629964	0.0108177	0.00441632
	611.62	0.054805	0.0715357	0.0593841	0.0379938	0.0686176	0.0433021	0.0559397	0.0122398	0.00499689
	612.245	0.0428688	0.0769308	0.099358	0.0545267	0.0785903	0.079649	0.0719873	0.0183877	0.00750676
	612.87	0.0448402	0.0679624	0.0827064	0.047691	0.081901	0.0590982	0.0640332	0.0149621	0.00610824
	613.495	0.0464083	0.0807843	0.0636473	0.0484328	0.0795391	0.0285668	0.0578964	0.0187399	0.00765052
	614.12	0.0399103	0.0727269	0.0792456	0.0284556	0.0491164	0.0552081	0.0541105	0.0176272	0.00719628
	614.746	0.0345154	0.0491151	0.0599358	0.0289325	0.0612693	0.0529684	0.0477894	0.0121765	0.00497103
	615.371	0.0434374	0.0579434	0.0608386	0.00874334	0.0628036	0.0453846	0.0465251	0.0184325	0.00752503
	615.996	0.0521601	0.0634784	0.0746314	0.0329598	0.0597553	0.0227906	0.0509626	0.0178576	0.00729034
	616.621	0.0383545	0.0497457	0.0838098	0.0392125	0.0741086	0.0654246	0.0584426	0.0172561	0.00704476
	617.246	0.0439967	0.0431597	0.0814525	0.0318999	0.0722514	0.0178395	0.0484333	0.0220393	0.00899752
	617.872	0.0473414	0.0635484	0.0591834	0.0349734	0.0599168	0.0230263	0.0479983	0.0147346	0.00601536
	618.497	0.0441619	0.0662109	0.0584311	0.0587128	0.0665988	0.0221618	0.0527129	0.0155467	0.00634691
	619.122	0.0477555	0.0690836	0.0591333	0.0507644	0.0603407	0.0411409	0.0547031	0.00918264	0.0037488
	619.747	0.0391595	0.066351	0.0472966	0.0243224	0.0590487	0.0179181	0.0423494	0.0173755	0.00709353
	620.372	0.0448803	0.0542299	0.0779918	0.0283496	0.0663162	0.00707293	0.0464735	0.023561	0.00961873
	620.998	0.035294	0.0514273	0.0635971	0.0282436	0.0498028	0.0411801	0.0449242	0.0115453	0.00471336
	621.623	0.0373905	0.0526184	0.066757	0.0393715	0.0622989	0.0381546	0.0494318	0.0118972	0.004857
	622.248	0.0357235	0.0503062	0.0795466	0.0245873	0.0405366	0.0503357	0.0468393	0.0170902	0.00697703
	622.873	0.033868	0.0465227	0.0513091	0.0256472	0.0415662	0.0411409	0.040009	0.00834465	0.00340669
	623.498	0.0342156	0.0653701	0.0640485	0.0715364	0.0548093	0.0254233	0.0525672	0.0170008	0.00694056
	624.124	0.0347054	0.0393763	0.0812519	0.0406433	0.0405165	0.0404336	0.0461545	0.0158311	0.00646302
	624.749	0.0435038	0.0393062	0.0696158	0.0259121	0.0446347	0.0161891	0.0398603	0.0167165	0.00682447
	625.374	0.0419604	0.0637587	0.0753335	0.047585	0.0503478	0.0350503	0.0523393	0.0134928	0.00550842
	625.999	0.034571	0.0543	0.0436353	0.0125057	0.053598	0.0260126	0.0374371	0.0149681	0.00611069
	626.625	0.024668	0.044561	0.0508075	0.0494926	0.0449577	0.0203936	0.0391467	0.0120236	0.00490862
	627.25	0.0312942	0.0523381	0.0710202	0.0170098	0.0597351	0.0262484	0.042941	0.0193456	0.00789779
	627.875	0.0351813	0.0521279	0.0651018	0.0180696	0.0430197	0.0573693	0.045145	0.0154561	0.00630991
	628.5	0.0368652	0.0557712	0.0811014	0.0205601	0.0361762	0.0696683	0.0500238	0.0208877	0.00852736
	629.125	0.0327789	0.0210193	0.0710202	0.0416501	0.0416873	0.0315531	0.0399515	0.015554	0.00634991
	629.75	0.0407492	0.0523381	0.0572274	0.0268129	0.0286462	0.0519075	0.0429469	0.0118467	0.0048364
	630.376	0.0357699	0.0384654	0.0637477	0.0338606	0.0271523	0.0248731	0.0373115	0.0127306	0.00519725
	631.001	0.0369162	0.0580134	0.0772395	0.0570702	0.0531337	0.0652674	0.0579401	0.012193	0.00497779
	631.626	0.0272032	0.0503763	0.0857157	0.0162679	0.0339151	0.029667	0.0405242	0.0226079	0.00922965
	632.251	0.025666	0.0498158	0.0855652	0.0123466	0.0473197	0.0427912	0.0439174	0.0227743	0.00929755
	632.876	0.0341817	0.0219301	0.0767379	0.0214079	0.0529722	0.0538328	0.0435104	0.0197543	0.00806467
	633.502	0.0371479	0.0334207	0.0539171	0.0181756	0.0336527	0.0210616	0.032896	0.011673	0.00476549
	634.127	0.0354053	0.0545802	0.037717	0.0244283	0.0392649	0.0031435	0.0324232	0.0157896	0.00644609
	634.752	0.0222177	0.0609561	0.0852643	0.0118698	0.0446751	0.0235764	0.0414266	0.025413	0.0103748
	635.377	0.0259518	0.0461724	0.0477982	0.0114988	0.033572	0.0168965	0.0303149	0.0136679	0.00557991
	636.003	0.0342651	0.0334907	0.0561742	0.0116578	0.0407587	0.0538721	0.0383698	0.0148167	0.00604889
	636.628	0.0274257	0.0437202	0.0460427	0.015897	0.0424141	0.0212974	0.0327995	0.0117895	0.00481305
	637.253	0.030344	0.0187072	0.053867	0.0436637	0.0313109	0.0363077	0.0357001	0.0110343	0.00450473
	637.878	0.0246463	0.0426692	0.0873206	0.0200302	0.047562	0.0173679	0.0399327	0.0239801	0.00978982
	638.503	0.0224772	0.0364335	0.0585816	0.0206661	0.0256988	0.0325355	0.0327321	0.0127942	0.00522323
	639.129	0.0193472	0.0304079	0.0601866	0.0205601	0.035187	0.0208259	0.0310858	0.0142477	0.00581661
	639.754	0.0288733	0.0339112	0.0752834	0.0485388	0.0354696	-0.00039296	0.0369472	0.0226381	0.00924197
	640.379	0.0129728	0.0593446	0.0720233	0.0306812	0.0293124	0.0220046	0.0377232	0.0209124	0.00853745
	641.004	0.0282862	0.0396564	0.0466948	0.0237395	0.03444	0.0279774	0.0334657	0.00780844	0.00318778
	641.629	0.0223583	0.0363634	0.0629451	0.00466314	0.0332893	0.0250303	0.0307749	0.017598	0.00718436
	642.255	0.0154679	0.0476438	0.0520112	0.0184405	0.0331884	0.00451878	0.0285451	0.0172596	0.0070462
	642.88	0.0254049	0.0373443	0.0637978	0.0245344	0.0381949	0.0245587	0.0356392	0.0138635	0.00565975
	643.505	0.0333691	0.0287264	0.0426322	0.031264	0.0292922	0.0170929	0.0303961	0.00753099	0.00307451
	644.13	0.0195511	0.0429495	0.0616912	0.0401664	0.0284645	0.0206687	0.0355819	0.0146461	0.00597923
	644.755	0.0219489	0.0288666	0.0455913	0.0239514	0.0332893	-0.00251478	0.0251888	0.0145769	0.00595101
	645.38	0.0183832	0.033701	0.0627947	0.0183345	0.0292316	0.0262485	0.0314489	0.0150681	0.00615154
	646.006	0.0172924	0.03265	0.0577791	0.0237925	0.0249115	0.00868402	0.0275183	0.0153949	0.00628496
	646.631	0.0265867	0.0283761	0.0474471	0.0219908	0.0243664	0.0394905	0.0313763	0.00906715	0.00370165
	647.256	0.0167069	0.0399367	0.05161	0.0227327	0.0297363	0.0131635	0.028981	0.0133701	0.00545832
	647.881	0.0238476	0.0342615	0.0608887	0.00959113	0.0273946	0.0119454	0.0279882	0.0170055	0.00694246
	648.506	0.0182132	0.0229812	0.0526131	0.0202951	0.026042	0.0145388	0.0257806	0.0125274	0.0051143
	649.132	0.019202	0.0136626	0.0432341	0.00821342	0.0332086	0.0408265	0.0263912	0.013433	0.005484
	649.757	0.0203112	0.0256436	0.0627445	0.0227327	0.0120318	0.00172892	0.0241988	0.0189651	0.00774247
	650.382	0.0167224	0.0170257	0.0560237	0.0191294	0.0293729	0.0392547	0.0295881	0.014289	0.00583347
	651.007	0.0227878	0.0226308	0.0629953	0.0112339	0.0255575	0.0244409	0.0282744	0.0162273	0.00662476
	651.632	0.0142474	0.0165352	0.0500551	0.00667673	0.0253152	0.0148531	0.0212805	0.0139692	0.00570288
	652.258	0.0151651	0.0259238	0.0260809	0.015738	0.0268495	0.0165428	0.02105	0.00525772	0.00214646
	652.883	0.0205353	0.0341914	0.013893	0.0131945	0.0160895	0.0418875	0.0232985	0.0109115	0.0044546
	653.508	0.0131242	0.034752	0.0474471	0.0225737	0.0267284	0.0170537	0.0269465	0.0114695	0.00468239
	654.133	0.01176	0.0194779	0.0651018	0.0151552	0.0163721	-0.0114739	0.0193988	0.0228306	0.00932055
	654.759	0.0151743	0.0417584	0.0448891	0.00879636	0.0338546	0.00911618	0.0255982	0.015078	0.00615556
	655.384	0.0167224	0.0184269	0.0287391	0.0190764	0.0276974	-0.00141459	0.0182079	0.00990797	0.00404491
	656.009	0.0219056	0.0283061	0.0526131	0.0125056	0.0266476	0.0141852	0.0260272	0.0132441	0.00540689
	656.634	0.0230396	0.0357329	0.0569265	-0.00413322	0.0270715	0.0056976	0.0240558	0.0198268	0.00809425
	657.259	0.0128894	0.0217901	0.0567259	0.0144133	0.00977077	0.000157196	0.0192911	0.017931	0.0073203
	657.885	0.0117709	0.0295673	0.0349082	0.0134595	0.022812	0.0113559	0.0206456	0.00916888	0.00374318
	658.51	0.0148685	0.0140129	0.0594342	-0.000211907	0.0281819	0.00919481	0.0209134	0.0191679	0.00782526
	659.135	0.0181854	0.00777715	0.0478483	0.00964415	0.0269303	-0.0175251	0.0154767	0.0198699	0.00811183
	659.76	0.0142319	0.0252232	0.0596349	-0.00429219	0.0161905	0.0199613	0.0218249	0.0192186	0.00784595
	660.385	0.0161044	0.0222105	0.0366135	0.00964415	0.0257795	0.00774091	0.0196822	0.00988597	0.00403593
	661.01	0.0132741	0.0274652	0.0396229	-0.00731261	0.0236598	0.0262877	0.0204995	0.0146255	0.00597085
	661.636	0.0174346	0.0351023	0.0367138	0.00063588	0.031634	0.0175644	0.0231808	0.0127119	0.00518962
	662.261	0.0164365	0.0126116	0.0346073	-0.00031794	0.0154637	0.0194113	0.0163687	0.0102899	0.00420082
	662.886	0.0131984	0.0342615	0.0373659	0.0130885	0.0182496	0.0175644	0.022288	0.00980289	0.00400201
	663.511	0.0130531	0.0161849	0.0456917	0.01081	0.0176238	-0.0130063	0.0150595	0.0171073	0.00698401
	664.136	0.00991384	0.0286564	0.0355603	0.010916	0.0219641	0.0148138	0.0203041	0.00941191	0.0038424
	664.762	0.0114897	0.0181467	0.0345572	0.000529847	0.0130816	0.0133992	0.0152007	0.0101661	0.00415028
	665.387	0.00704492	0.0181467	0.0317484	-0.00450417	0.0264457	0.00534401	0.0140376	0.0126015	0.00514456
	666.012	0.013203	0.0358029	0.0506069	0.00524601	0.0126374	0.00192543	0.0199036	0.0174701	0.00713215
	666.637	0.00826694	0.0149237	0.0334036	0.0138833	0.0176238	0.014028	0.0170215	0.0078378	0.00319977
	667.263	0.0185129	0.0224206	0.0398234	0.0340196	0.0230744	-0.00840894	0.0215737	0.0152712	0.00623442
	667.888	0.00965277	0.0145734	0.0390711	0.00869041	0.018512	0.00499036	0.015915	0.0112213	0.00458108
	668.513	0.0159684	0.0206689	0.0395727	0.00741857	0.0183101	0.000353646	0.0170487	0.012211	0.00498514
	669.138	0.00329845	0.0113504	0.0450396	-0.00296741	0.023357	0.0390583	0.0198561	0.0177135	0.0072315
	669.763	0.0149194	0.00833763	0.0432341	0.00863739	0.0275359	0.0215331	0.0206996	0.0121584	0.00496363
	670.389	0.00862383	0.0314589	0.0328017	0.0117638	0.0217017	0.00188611	0.0180393	0.0115498	0.00471518
	671.014	0.0138766	0.0122613	0.0708195	0.00768349	0.0200261	0.0143423	0.0231682	0.0216159	0.00882466
	671.639	0.0131937	0.034752	0.0334537	0.00710063	0.0132027	0.0363077	0.0230017	0.0120376	0.00491434
	672.264	0.00963575	0.0371341	0.0409771	0.00264947	0.00583419	0.00294705	0.0165296	0.0161312	0.00658552
	672.889	0.0158016	0.0296373	0.0240746	0.0065707	0.0221256	0.00762308	0.0176388	0.0084824	0.00346293
	673.514	0.00294775	0.0212996	0.0247267	0.00360337	0.0232157	0.0133207	0.0148523	0.00894074	0.00365004
	674.14	0.0147155	0.0173058	0.0341559	0.00975018	0.0212374	0.0117882	0.0181588	0.00805458	0.00328827
	674.765	0.00850331	0.0125415	0.0196107	0.0163739	0.0118299	-0.0118275	0.00950531	0.0101654	0.00415001
	675.39	0.00311459	0.0264844	0.0231718	-0.000847866	0.0221861	0.00479385	0.0131505	0.0110028	0.00449187
	676.015	0.00692594	0.0102995	0.0370649	0.0166918	0.0143938	0.0102557	0.0159386	0.00995486	0.00406405
	676.64	0.00641459	0.017446	0.0237737	0.00063588	0.0139092	-0.00703361	0.00919097	0.0103859	0.00424002
	677.266	0.0120706	0.0202486	0.0260307	0.00137771	0.013667	-0.00946983	0.0106541	0.0117658	0.00480336
	677.891	0.00294925	0.0237518	0.0278864	0.00566998	0.00506707	-0.0191755	0.00769151	0.0153897	0.00628284
	678.516	0.00560039	0.0120511	0.0236734	0.00121882	0.0154435	0.0159141	0.0123169	0.00730337	0.00298159
	679.141	0.00292609	0.0299875	0.0178051	0.00211962	0.0153022	0.00982347	0.012994	0.00954745	0.00389773
	679.766	0.00242091	0.00546503	0.0198616	-0.00688864	0.0201472	-0.00365435	0.00622529	0.010523	0.004296
	680.392	0.0109134	0.0112804	0.0254789	0.00816048	0.0119107	-0.0051475	0.0104327	0.00892029	0.00364169
	681.017	0.0065011	0.0229812	0.0316481	0.00143073	0.00950835	0.0104129	0.0137471	0.0103199	0.00421306
	681.642	0.00211036	0.00798735	0.0210151	0.010916	0.0100332	-0.00550121	0.00776014	0.00815123	0.00332773
	682.267	0.00439996	0.0208091	0.02583	0.00153676	0.0142322	0.00856608	0.0125624	0.00866976	0.00353941
	682.892	0.0017164	0.0106499	0.0170529	-0.00174867	0.0082769	0.0234585	0.00990099	0.00857183	0.00349943
	683.518	0.0123208	0.0155543	0.0251781	-0.0175396	0.00811541	0.0225548	0.0110306	0.0140229	0.00572481
	684.143	0.00648097	0.0193378	0.026131	-0.00413322	0.0141313	-0.0234192	0.00642143	0.0164145	0.00670118
	684.768	0.00881848	0.03251	0.026131	0.0117638	0.0131421	0.00278986	0.0158592	0.0102249	0.0041743
	685.393	0.00524811	0.0187773	0.017103	0.015579	0.0127586	0.0113953	0.0134769	0.00443892	0.00181218
	686.019	0.00975779	0.0208792	0.0116863	0.0111279	0.00506707	0.00581548	0.0107223	0.00518404	0.00211638
	686.644	0.00624771	0.0109301	0.0260307	-0.00296749	0.00835766	-0.0064442	0.00702574	0.010489	0.00428212
	687.269	-6.02362e-05	0.00182164	0.0232219	0.00943216	0.0217017	-0.0170929	0.00650404	0.0137892	0.00562944
	687.894	0.00467034	0.017446	0.037115	0.0200302	0.0209951	-0.0241265	0.0126884	0.0189817	0.00774924
	688.519	0.00653199	0.00483445	0.0321496	0.00355035	0.0161501	0.0182717	0.0135814	0.0100017	0.00408317
	689.144	0.0115685	0.0181467	0.0324506	0.000953819	0.00906421	-0.0285668	0.0072695	0.0187004	0.00763441
	689.77	0.00543974	0.0156243	0.0242753	0.00990915	0.019582	0.0144602	0.0148818	0.00612288	0.00249965
	690.395	0.00437215	0.000980867	0.0145451	-0.00402726	0.000726753	-0.0208651	-0.000711261	0.0106513	0.00434838
	691.02	0.00542425	0.026134	0.0224195	-0.0162149	0.00298777	0.00813387	0.00814741	0.0138731	0.00566365
	691.645	0.00260477	0.00574521	0.0162003	0.00365631	0.0107802	0.0209045	0.00998186	0.00672052	0.00274364
	692.27	0.00561584	0.00770705	0.0174541	0.00397425	0.00492575	-0.00247552	0.00620024	0.00593169	0.0024216
	692.896	0.0102337	0.017446	0.0235229	0.00853136	-0.002584	0.020983	0.0130222	0.00880063	0.00359284
	693.521	0.00264338	0.0126116	0.00571772	0.0195003	0.00385582	0.0148531	0.00986366	0.00620116	0.00253161
	694.146	0.0103202	0.0163251	0.0219681	-0.000211907	0.000242251	-0.00294705	0.00761611	0.00927694	0.0037873
	694.771	0.00190337	0.0221404	0.020012	0.0179636	0.0031089	0.00683716	0.0119942	0.00826875	0.0033757
	695.396	0.00296938	0.0149237	0.00827565	0.00100676	0.00397697	0.0302957	0.0102414	0.0100446	0.0041007
	696.022	0.00485112	0.00889822	0.000300933	0.00450409	0.00833746	-0.00149315	0.00423311	0.00381481	0.00155739
	696.647	0.00489899	0.00651599	0.0194604	-0.00302043	0.01076	-0.0117882	0.00447111	0.00990859	0.00404516
	697.272	0.00409717	0.0139429	0.00677099	0.0112869	0.00565253	-0.00400799	0.0062904	0.00570131	0.00232755
	697.897	0.0072025	0.015274	0.00115363	0.00577593	0.0117088	0.00946988	0.00843079	0.00447528	0.00182702
	698.523	0.00541035	0.0126817	0.0182064	0.0245873	0.00763091	-0.00306494	0.0109086	0.00894188	0.00365051
	699.148	0.00454986	0.0243824	-0.000351113	-0.0183346	0.0116684	-0.0197649	0.000358349	0.0156924	0.00640641
	699.773	0.00278087	0.00196184	0.0266827	0.00190764	0.00966984	-0.00683716	0.00602763	0.0104039	0.00424738
	700.398	0.00542272	0.0210894	-0.00160495	0.00672975	0.00853935	0.00267198	0.00714138	0.00702495	0.00286792
	pHo=6
	Wavelenght (nm)	Exp_1	Exp_2	Exp_3	Exp_4	Exp_5	Exp_6	Average	S.D.	S.E.M.
	405.929	0.00241953	0.0106889	0.00490961	-0.00081543	0.00139716	4.31291e-05	0.00310715	0.00384932	0.00157148
	406.554	-0.000615568	0.00290731	-0.0019122	0.000557977	0.00168063	-0.00913878	-0.00108677	0.00391694	0.00159908
	407.179	-0.000609989	0.00692643	0.00578823	0.00171681	-0.00139716	0.00172426	0.0023581	0.00306485	0.00125122
	407.805	0.000604457	0.00188117	0.00868231	0.000600854	-0.00269306	0.00267265	0.00195806	0.00344091	0.00140475
	408.43	0.00356164	0.00820911	0.00925084	-0.000214577	0.00445473	-0.00586265	0.00323318	0.00511848	0.00208961
	409.055	-0.000552498	0.00957733	0.0124033	-0.00270394	-0.000668208	-0.00741445	0.00177359	0.00694899	0.00283691
	409.68	0.000741613	0.0126557	0.00640839	-0.000429154	0.00372577	0.00275884	0.0043102	0.0043204	0.0017638
	410.305	0.00102344	0.000513069	0.00780376	-0.00291858	0.00149843	-0.00689723	0.000170482	0.00447903	0.00182856
	410.93	9.08223e-05	0.0181285	0.00485798	0.00231766	0.00589238	-0.00219848	0.00484815	0.00653388	0.00266745
	411.556	-0.00130527	0.011031	0.00620165	0.00287564	0.00133642	-0.0126306	0.00125148	0.00732616	0.00299089
	412.181	0.00118476	0.010176	0.00573652	-0.00223184	0.000283472	-0.00926816	0.000980117	0.00609724	0.00248919
	412.806	0.000656322	-0.000598623	0.00811385	0.00369113	0.00400925	0.00775936	0.00393855	0.0032521	0.00132766
	413.431	0.00141462	0.0107745	0.00888905	0.00656671	0.00309805	-0.000862129	0.00498013	0.00411821	0.00168125
	414.057	-0.000945573	0.00145365	0.00392766	-0.00626631	0.00811972	0.0222435	0.00475544	0.00896956	0.00366181
	414.682	0.00221746	0.0144515	0.0071836	-0.00463532	0.0090714	0.0121995	0.00674801	0.00638691	0.00260745
	415.307	0.00585882	0.0243708	0.00785539	-0.00180263	0.0124125	0.0239678	0.0121104	0.00950233	0.00387931
	415.932	0.000689701	0.00752506	0.00361765	0.009056	0.0119467	0.0268991	0.00995571	0.00840427	0.00343103
	416.557	0.0101269	0.0319813	0.0257368	0.0103866	0.0250679	0.0209934	0.0207155	0.00806181	0.00329122
	417.183	0.0093389	0.0308696	0.0154008	0.0300867	0.0326207	0.0232781	0.0235991	0.00863139	0.00352375
	417.808	0.0285062	0.032751	-0.000568458	0.0242926	0.035172	0.0446163	0.0274616	0.0140151	0.00572162
	418.433	0.0214719	0.0586609	0.0508018	0.0324043	0.0460253	0.0860857	0.0492417	0.020468	0.00835604
	419.058	0.0239341	0.0402759	0.0309049	0.0524478	0.062852	0.0870772	0.049582	0.0211481	0.00863367
	419.683	0.0441156	0.0671265	0.0587606	0.0784571	0.0627305	0.122943	0.0723555	0.0248281	0.010136
	420.308	0.0539032	0.0360004	0.0697685	0.0793155	0.0869277	0.110829	0.0727908	0.0238355	0.00973078
	420.934	0.0588851	0.0864522	0.0644454	0.0692723	0.10343	0.148118	0.0884338	0.0305688	0.0124797
	421.559	0.0792167	0.0947468	0.124808	0.0896592	0.10991	0.202562	0.116817	0.041033	0.0167517
	422.184	0.087916	0.124077	0.141139	0.104381	0.124023	0.184112	0.127608	0.0303208	0.0123784
	422.809	0.107348	0.11279	0.139537	0.112965	0.152615	0.177388	0.133774	0.0253706	0.0103575
	423.435	0.112751	0.129721	0.130235	0.137944	0.161686	0.22334	0.149279	0.0361639	0.0147638
	424.06	0.125476	0.137588	0.162121	0.135154	0.174139	0.229591	0.160678	0.0350145	0.0142946
	424.685	0.138691	0.168116	0.145119	0.150219	0.18566	0.296278	0.18068	0.0540079	0.0220486
	425.31	0.164442	0.145113	0.179848	0.180649	0.207205	0.240971	0.186371	0.0307506	0.0125539
	425.935	0.16984	0.177094	0.181088	0.186915	0.218038	0.304641	0.206269	0.0465519	0.0190047
	426.56	0.185972	0.198643	0.191321	0.201508	0.198336	0.323953	0.216622	0.0482797	0.0197101
	427.186	0.191397	0.244819	0.265482	0.184769	0.257361	0.253214	0.23284	0.0322845	0.0131801
	427.811	0.220014	0.224468	0.211631	0.18743	0.276719	0.349645	0.244985	0.0538986	0.022004
	428.436	0.218798	0.236525	0.248893	0.201679	0.256227	0.281147	0.240545	0.0257027	0.0104931
	429.061	0.229911	0.239603	0.313907	0.220349	0.285527	0.376372	0.277612	0.0549734	0.0224428
	429.687	0.246698	0.27338	0.267704	0.262282	0.324324	0.333695	0.284681	0.0324917	0.0132647
	430.312	0.250043	0.289457	0.274371	0.277647	0.299458	0.305288	0.282711	0.0182486	0.00744998
	430.937	0.273456	0.281932	0.328842	0.239792	0.330641	0.318004	0.295445	0.0332327	0.0135672
	431.562	0.274541	0.308013	0.300005	0.309279	0.341495	0.358525	0.315309	0.0275052	0.011229
	432.187	0.287276	0.351623	0.344553	0.251166	0.367028	0.339946	0.323599	0.0407097	0.0166197
	432.812	0.293461	0.314768	0.328325	0.310824	0.385495	0.250972	0.313974	0.0402529	0.0164332
	433.438	0.311234	0.335034	0.383313	0.314987	0.392319	0.319384	0.342712	0.032843	0.0134081
	434.063	0.32178	0.317419	0.345225	0.346276	0.384827	0.406116	0.353607	0.0320895	0.0131005
	434.688	0.338936	0.384289	0.385381	0.357521	0.390436	0.33417	0.365122	0.0228039	0.00930965
	435.313	0.352645	0.331272	0.397681	0.317348	0.411211	0.423144	0.372217	0.0404818	0.0165266
	435.938	0.370633	0.374968	0.399179	0.32473	0.40218	0.312918	0.364101	0.0341835	0.0139553
	436.564	0.378166	0.374198	0.437371	0.337563	0.44373	0.369604	0.390106	0.0380488	0.0155334
	437.189	0.413588	0.420973	0.466881	0.396277	0.508769	0.408961	0.435908	0.0393405	0.0160607
	437.814	0.396041	0.447824	0.464658	0.402114	0.470013	0.464182	0.440805	0.0303277	0.0123812
	438.439	0.402161	0.413106	0.42104	0.363272	0.471593	0.449008	0.42003	0.0343709	0.0140319
	439.065	0.417213	0.458256	0.488276	0.373358	0.524705	0.338351	0.43336	0.064378	0.0262822
	439.69	0.462152	0.436365	0.506985	0.45027	0.538292	0.49703	0.481849	0.0353601	0.0144357
	440.315	0.459676	0.418921	0.530654	0.435849	0.532764	0.479744	0.476268	0.0435113	0.0177634
	440.94	0.484591	0.436023	0.512773	0.458468	0.556495	0.506729	0.492513	0.0389855	0.0159158
	441.565	0.458903	0.524442	0.501661	0.490057	0.5715	0.512247	0.509802	0.034336	0.0140176
	442.19	0.526686	0.499131	0.567089	0.454777	0.532703	0.472028	0.508736	0.037976	0.0155036
	442.816	0.503551	0.563607	0.533858	0.497696	0.593449	0.518153	0.535052	0.0339126	0.0138448
	443.441	0.501738	0.513411	0.572464	0.524435	0.647189	0.577339	0.556096	0.0496595	0.0202734
	444.066	0.520369	0.527692	0.58988	0.499413	0.658306	0.71912	0.585797	0.0797584	0.0325612
	444.691	0.545225	0.540262	0.634428	0.494992	0.648384	0.580659	0.573992	0.0539095	0.0220085
	445.317	0.55684	0.557706	0.6228	0.557784	0.64806	0.594367	0.589593	0.035696	0.0145728
	445.942	0.575717	0.521364	0.640733	0.561003	0.67414	0.669891	0.607141	0.0577768	0.0235873
	446.567	0.627998	0.566257	0.58466	0.572462	0.673877	0.626568	0.608637	0.0379301	0.0154849
	447.192	0.59888	0.634239	0.660734	0.548985	0.7441	0.767012	0.658992	0.0766404	0.0312883
	447.817	0.599673	0.692985	0.652258	0.629374	0.699654	0.674978	0.658154	0.0353591	0.0144353
	448.442	0.618805	0.639028	0.684145	0.644009	0.736183	0.766064	0.681372	0.0536784	0.0219141
	449.068	0.64761	0.682467	0.692207	0.667143	0.74985	0.712654	0.691989	0.0327936	0.0133879
	449.693	0.667875	0.649631	0.776911	0.627914	0.739929	0.740415	0.700446	0.0546309	0.022303
	450.318	0.682598	0.670068	0.685747	0.666929	0.79136	0.837623	0.722387	0.0668021	0.0272718
	450.943	0.703929	0.681954	0.73629	0.624824	0.796179	0.659632	0.700468	0.0550579	0.0224773
	451.568	0.705047	0.799191	0.766472	0.656542	0.781378	0.699334	0.73466	0.0509674	0.0208074
	452.194	0.697028	0.767209	0.747608	0.730664	0.855609	0.821285	0.769901	0.0537594	0.0219472
	452.819	0.720547	0.767637	0.797532	0.692294	0.835705	0.761452	0.762528	0.0470861	0.0192228
	453.444	0.730294	0.758316	0.737427	0.703153	0.862636	0.681918	0.745624	0.05776	0.0235804
	454.069	0.768962	0.783542	0.787867	0.774099	0.8467	0.746105	0.784546	0.0308352	0.0125884
	454.695	0.763363	0.816379	0.723164	0.790451	0.849231	0.921898	0.810748	0.0635023	0.0259247
	455.32	0.770225	0.788673	0.866112	0.752081	0.849231	0.792877	0.8032	0.041018	0.0167455
	455.945	0.758006	0.838868	0.846576	0.787661	0.893819	0.814732	0.823277	0.0435198	0.0177669
	456.57	0.792008	0.798849	0.863166	0.843972	0.879402	0.960048	0.856241	0.0561702	0.0229314
	457.195	0.817001	0.859049	0.862184	0.764871	0.919514	0.861633	0.847375	0.0474209	0.0193595
	457.82	0.812384	0.819371	0.801098	0.818006	0.940128	0.910388	0.850229	0.054064	0.0220715
	458.446	0.842342	0.826982	0.932056	0.797147	0.875919	0.762443	0.839481	0.0544507	0.0222294
	459.071	0.834854	0.872389	0.876344	0.754012	0.929436	0.784514	0.841925	0.0589429	0.0240633
	459.696	0.823959	0.81253	0.950816	0.777704	0.930327	0.98311	0.879741	0.0778206	0.0317701
	460.321	0.849692	0.869225	0.914536	0.770923	0.920466	1.01376	0.889767	0.0742542	0.0303142
	460.947	0.880122	0.8735	0.896396	0.869466	0.953127	0.917544	0.898359	0.0293167	0.0119685
	461.572	0.893442	0.902318	0.854225	0.90951	0.999355	0.980955	0.923301	0.0506651	0.020684
	462.197	0.911467	0.890004	0.907663	0.851912	0.979815	0.920605	0.910244	0.0382272	0.0156062
	462.822	0.901059	0.922584	0.997432	0.86247	0.964669	0.920173	0.928064	0.0433511	0.017698
	463.447	0.897567	1.00433	1.00673	0.86732	0.987267	0.957117	0.95339	0.0534266	0.0218113
	464.072	0.925909	0.963629	0.9042	0.95243	0.971716	0.885903	0.933964	0.0313763	0.0128093
	464.698	0.947028	0.929339	1.00141	0.85247	0.982387	0.924743	0.939563	0.0476517	0.0194537
	465.323	0.905392	0.921045	0.959705	0.991101	0.980645	1.05131	0.968199	0.0480047	0.0195978
	465.948	0.913894	0.985691	0.920945	1.02651	0.984189	1.05764	0.981479	0.0517783	0.0211384
	466.573	0.924409	0.965853	1.01304	0.932945	1.03424	0.991344	0.976972	0.0400258	0.0163405
	467.199	0.92727	0.987316	0.949265	0.988912	1.01493	0.947633	0.96922	0.0300786	0.0122795
	467.824	0.946149	0.984751	1.00446	0.921871	1.04167	1.02497	0.987312	0.0421323	0.0172004
	468.449	1.00449	1.00536	0.979653	0.906978	1.00442	0.933364	0.972377	0.0387243	0.0158091
	469.074	0.955518	0.951914	0.930712	0.897321	0.995326	1.09265	0.970573	0.0619734	0.0253005
	469.699	0.963511	1.02639	1.0271	0.987667	1.0109	1.02893	1.00742	0.024291	0.00991674
	470.325	0.968267	1.00006	1.061	1.00127	1.02177	0.964876	1.00287	0.032628	0.0133203
	470.95	0.97589	0.972095	1.06095	0.989856	1.02294	1.04277	1.01075	0.0337632	0.0137838
	471.575	0.95537	1.01331	1.00446	0.942859	0.997614	0.930218	0.973972	0.0323125	0.0131915
	472.2	0.97305	0.977482	1.05345	0.960542	1.06686	1.03286	1.01071	0.0418528	0.0170863
	472.825	1.00353	1.0004	1.04193	0.951443	1.05154	0.96285	1.00195	0.0368369	0.0150386
	473.45	0.999515	1.0742	1.00782	1.00934	0.992835	1.02092	1.01744	0.0268271	0.0109521
	474.076	1.03621	1.08702	0.944562	0.994019	0.964244	0.956082	0.997023	0.0502445	0.0205122
	474.701	1.02053	1.05453	1.09919	0.935648	1.00351	1.00475	1.01969	0.0501378	0.0204687
	475.326	1.01053	1.00844	1.04487	1.09166	0.973335	1.01079	1.02327	0.0369135	0.0150699
	475.951	1.01251	1.02819	1.03697	0.965993	1.00948	1.08036	1.02225	0.0342824	0.0139957
	476.577	1.02715	1.08035	0.966992	1.12703	1.00956	0.844218	1.00922	0.0896929	0.036617
	477.202	0.962595	0.945843	0.943322	0.98462	1.01316	1.09459	0.990689	0.0522506	0.0213312
	477.827	1.00836	1.05461	1.00601	1.05698	1.02938	0.969532	1.02081	0.0303542	0.012392
	478.452	1.01015	1.06821	0.907663	1.0508	0.996338	1.07433	1.01791	0.056972	0.0232587
	479.077	1.013	0.959696	0.980325	1.01209	0.958331	1.00859	0.988672	0.0236879	0.00967055
	479.702	1.01082	1.0523	0.961565	1.00771	1.00093	1.06708	1.01674	0.034665	0.0141519
	480.328	0.989763	1.01878	0.964821	1.03415	0.995103	0.936554	0.989862	0.0323884	0.0132225
	480.953	1.03466	1.02819	0.971798	1.08188	1.00085	1.05165	1.02817	0.035123	0.0143389
	481.578	1.00626	1.07437	0.972315	1.01496	0.968253	1.04734	1.01392	0.0379628	0.0154982
	482.203	0.972755	0.995012	0.958051	1.03054	0.985566	1.00367	0.990933	0.0230522	0.009411
	482.829	1.01358	1.09917	0.947922	0.999341	0.958615	0.932718	0.99189	0.0556412	0.0227154
	483.454	0.978727	1.04863	1.04265	1.07046	1.02726	1.06402	1.03862	0.0302537	0.012351
	484.079	1.0451	0.96534	1.04203	0.969984	0.988259	0.961298	0.995335	0.0351378	0.014345
	484.704	1.00813	0.960979	1.03309	1.00432	0.943793	1.04057	0.998482	0.0353414	0.0144281
	485.329	0.997081	0.921387	0.987716	1.01835	1.00494	1.07183	1.00022	0.0444587	0.0181502
	485.954	0.995464	0.990052	0.978672	1.00217	0.940897	1.1339	1.00686	0.0601656	0.0245625
	486.58	0.967519	1.02186	0.99154	1.02089	0.955942	0.955823	0.985596	0.0279541	0.0114122
	487.205	0.993513	1.00134	0.988387	1.07136	0.910747	0.932157	0.982918	0.0517831	0.0211404
	487.83	0.957698	0.983981	0.889936	0.999985	0.972384	0.837493	0.940246	0.0576023	0.023516
	488.455	0.94952	0.977824	1.01888	0.973418	0.925144	1.07058	0.985893	0.0474226	0.0193602
	489.08	0.995128	1.06479	0.929937	0.988611	0.949523	0.949056	0.979507	0.0445039	0.0181686
	489.706	0.996233	0.946185	1.0563	0.928695	0.966917	0.998112	0.982073	0.0415001	0.0169423
	490.331	0.99246	0.999972	0.913709	0.917064	0.896735	0.980438	0.950063	0.0417642	0.0170501
	490.956	0.937762	0.913605	0.953917	0.968525	0.904794	0.904482	0.930514	0.0247323	0.0100969
	491.581	0.966496	0.916085	1.00518	0.949984	0.923443	0.975351	0.95609	0.0305314	0.0124644
	492.207	0.983377	0.941567	0.88668	0.990929	0.907223	0.894826	0.934101	0.0412854	0.0168547
	492.832	0.902097	0.865291	0.876189	0.919296	0.843521	0.929614	0.889335	0.0303666	0.0123971
	493.457	0.917556	0.910527	0.986889	0.947323	0.858829	0.989059	0.93503	0.0455923	0.018613
	494.082	0.909923	0.88684	0.889058	0.970242	0.896026	0.933019	0.914185	0.0295074	0.0120464
	494.707	0.91227	0.952684	0.908283	0.926592	0.867232	0.93039	0.916242	0.0261928	0.0106932
	495.332	0.894091	0.875039	0.967715	0.922773	0.83856	0.932847	0.905171	0.0417438	0.0170418
	495.958	0.922621	0.897358	0.96818	0.900025	0.876972	0.828182	0.89889	0.0425206	0.017359
	496.583	0.88617	0.980133	0.874535	0.983461	0.82309	0.897671	0.90751	0.0574585	0.0234573
	497.208	0.903942	0.890346	0.898205	0.847277	0.812905	0.947676	0.883392	0.0430024	0.0175557
	497.833	0.908888	0.904626	0.889316	0.887235	0.822159	0.84327	0.875916	0.0320801	0.0130966
	498.459	0.855107	0.894707	0.825232	0.915176	0.796827	0.912285	0.866556	0.0446249	0.018218
	499.084	0.807877	0.89599	0.848178	0.851483	0.778907	0.849994	0.838738	0.0369417	0.0150814
	499.709	0.885306	0.833224	0.803888	0.867063	0.77666	0.820638	0.83113	0.0366284	0.0149535
	500.334	0.855056	0.835619	0.851073	0.84144	0.764207	0.875342	0.837122	0.0349154	0.0142542
	500.959	0.872773	0.87769	0.821098	0.890497	0.774108	0.869953	0.85102	0.0406451	0.0165933
	501.584	0.834348	0.826127	0.854484	0.841011	0.754892	0.806326	0.819531	0.0324001	0.0132273
	502.21	0.800587	0.8133	0.811175	0.784786	0.724985	0.858702	0.798923	0.0399996	0.0163298
	502.835	0.846017	0.790297	0.851434	0.793284	0.716015	0.73063	0.787946	0.0514722	0.0210134
	503.46	0.821345	0.801072	0.851486	0.846676	0.719984	0.887843	0.821401	0.0526897	0.0215105
	504.085	0.808037	0.742326	0.793707	0.837534	0.724054	0.816629	0.787048	0.0405733	0.016564
	504.711	0.757395	0.80988	0.795516	0.826633	0.697325	0.79042	0.779528	0.0423507	0.0172896
	505.336	0.765211	0.828778	0.838153	0.803928	0.708381	0.748476	0.782154	0.0459119	0.0187435
	505.961	0.749422	0.733945	0.799289	0.809035	0.667499	0.677866	0.739509	0.0540403	0.0220618
	506.586	0.757693	0.810051	0.78611	0.719848	0.669888	0.704938	0.741421	0.0481063	0.0196393
	507.211	0.78263	0.77063	0.711897	0.728432	0.672298	0.65808	0.720661	0.046061	0.0188043
	507.837	0.702023	0.723085	0.748074	0.77706	0.666891	0.709033	0.721028	0.0349074	0.0142509
	508.462	0.726995	0.726677	0.731381	0.739463	0.65786	0.697911	0.713381	0.027953	0.0114118
	509.087	0.731942	0.713679	0.707194	0.693539	0.667661	0.642733	0.692791	0.0297613	0.01215
	509.712	0.726532	0.735912	0.731174	0.736973	0.616371	0.544103	0.681844	0.0748913	0.0305743
	510.337	0.662012	0.716758	0.746833	0.724183	0.594664	0.664072	0.684754	0.0508164	0.0207457
	510.962	0.706128	0.680672	0.711432	0.777017	0.589258	0.762572	0.704513	0.0612786	0.0250169
	511.588	0.689705	0.612348	0.639131	0.653237	0.585552	0.651182	0.638526	0.0328829	0.0134244
	512.213	0.697772	0.70718	0.716239	0.770579	0.600314	0.580227	0.678718	0.0669167	0.0273186
	512.838	0.669495	0.705128	0.684507	0.740793	0.565324	0.627904	0.665525	0.0563698	0.0230129
	513.463	0.666492	0.672719	0.648124	0.713453	0.600476	0.667563	0.661471	0.0336393	0.0137332
	514.088	0.663407	0.628595	0.683525	0.595038	0.575671	0.577986	0.620704	0.0415206	0.0169507
	514.714	0.674696	0.625004	0.59758	0.649932	0.525009	0.693255	0.627579	0.0554681	0.0226448
	515.339	0.651157	0.637403	0.62833	0.580402	0.552992	0.600876	0.608527	0.0341001	0.0139213
	515.964	0.585291	0.669983	0.62156	0.605596	0.589663	0.589194	0.610214	0.029461	0.0120274
	516.589	0.601579	0.609184	0.623886	0.566711	0.55522	0.589237	0.590969	0.0237954	0.00971443
	517.215	0.570525	0.633298	0.621302	0.583965	0.543071	0.518627	0.578465	0.0403492	0.0164725
	517.84	0.605812	0.620814	0.567606	0.571818	0.53892	0.654071	0.593173	0.0380469	0.0155326
	518.465	0.616727	0.56848	0.56559	0.59963	0.525029	0.562209	0.572944	0.0291953	0.0119189
	519.09	0.585528	0.54753	0.571017	0.590918	0.506724	0.587383	0.56485	0.0298091	0.0121695
	519.715	0.562658	0.591141	0.527243	0.545766	0.492266	0.52492	0.540666	0.0311663	0.0127236
	520.341	0.544741	0.534789	0.538096	0.505636	0.494534	0.583073	0.533478	0.0285811	0.0116682
	520.966	0.543098	0.558903	0.51298	0.575424	0.477991	0.423876	0.515379	0.0517114	0.0211111
	521.591	0.518804	0.516575	0.549931	0.513577	0.492793	0.54225	0.522322	0.0189438	0.00773379
	522.216	0.545677	0.50238	0.574428	0.533749	0.458998	0.563114	0.529724	0.0390168	0.0159285
	522.841	0.532328	0.540518	0.535047	0.519027	0.432209	0.525955	0.514181	0.0372825	0.0152205
	523.466	0.518261	0.507853	0.500731	0.486623	0.479024	0.478451	0.495157	0.0149347	0.00609707
	524.092	0.520401	0.50905	0.454322	0.531989	0.422935	0.543715	0.497069	0.0436011	0.0178001
	524.717	0.510654	0.472195	0.569001	0.501774	0.473395	0.466984	0.499	0.0352203	0.0143786
	525.342	0.508088	0.495881	0.548897	0.49937	0.408133	0.513152	0.495587	0.0427578	0.0174558
	525.967	0.506289	0.473221	0.514788	0.540487	0.413357	0.473235	0.486896	0.0404304	0.0165056
	526.592	0.478654	0.503748	0.468999	0.41469	0.432168	0.445301	0.45726	0.0298372	0.012181
	527.218	0.481126	0.452014	0.402073	0.461773	0.405906	0.397064	0.433326	0.0328807	0.0134235
	527.843	0.465057	0.450988	0.480783	0.414175	0.403982	0.455948	0.445155	0.0272975	0.0111442
	528.468	0.451569	0.45304	0.48223	0.427866	0.388188	0.377234	0.430021	0.0371058	0.0151484
	529.093	0.473452	0.415757	0.514892	0.438038	0.406837	0.410772	0.443291	0.0391758	0.0159934
	529.718	0.4766	0.432261	0.451325	0.40735	0.3647	0.396589	0.421471	0.036716	0.0149892
	530.344	0.459452	0.439187	0.448689	0.402758	0.369154	0.491081	0.435054	0.0394189	0.0160927
	530.969	0.419304	0.409686	0.423004	0.43263	0.387317	0.429265	0.416868	0.0151137	0.00617012
	531.594	0.451394	0.436793	0.404968	0.44409	0.389646	0.409866	0.422793	0.0225505	0.00920618
	532.219	0.416187	0.4155	0.419696	0.396921	0.366704	0.366198	0.396868	0.022701	0.00926765
	532.845	0.38922	0.410968	0.434477	0.381899	0.384564	0.382967	0.397349	0.0193178	0.00788645
	533.47	0.378164	0.409515	0.440834	0.425205	0.332261	0.41935	0.400888	0.0361208	0.0147462
	534.095	0.386637	0.410883	0.443056	0.370697	0.354717	0.34111	0.384517	0.0343746	0.0140334
	534.72	0.384309	0.402588	0.416802	0.395977	0.339227	0.400383	0.389881	0.0245987	0.0100424
	535.345	0.405202	0.377875	0.41613	0.420183	0.334084	0.367061	0.386756	0.0304458	0.0124294
	535.971	0.385764	0.39207	0.367241	0.400955	0.31748	0.333092	0.3661	0.0309052	0.012617
	536.596	0.377191	0.361457	0.386208	0.381856	0.322501	0.410858	0.373345	0.0270379	0.0110382
	537.221	0.352365	0.359148	0.40321	0.324902	0.305492	0.268776	0.335649	0.042609	0.0173951
	537.846	0.366597	0.382408	0.42626	0.344602	0.323635	0.331928	0.362572	0.0347463	0.0141851
	538.471	0.343323	0.367956	0.375923	0.367435	0.281133	0.334471	0.34504	0.0320915	0.0131013
	539.096	0.357419	0.368982	0.429567	0.315974	0.29474	0.334471	0.350192	0.0432023	0.0176373
	539.722	0.341087	0.301685	0.390807	0.316618	0.286884	0.312012	0.324849	0.0337259	0.0137685
	540.347	0.359477	0.294587	0.378972	0.32091	0.281558	0.323651	0.326526	0.0339568	0.0138628
	540.972	0.336566	0.366417	0.341762	0.29254	0.278744	0.280285	0.316053	0.03377	0.0137865
	541.597	0.340019	0.373429	0.409774	0.324473	0.286722	0.26912	0.333923	0.0480761	0.019627
	542.222	0.328188	0.359063	0.313907	0.260007	0.278987	0.304555	0.307451	0.0321584	0.0131286
	542.848	0.304091	0.302882	0.303364	0.300953	0.250679	0.283734	0.29095	0.0193349	0.00789343
	543.473	0.341064	0.339139	0.299591	0.279664	0.283097	0.310245	0.3088	0.024351	0.00994125
	544.098	0.32201	0.330844	0.337576	0.232968	0.267506	0.276707	0.294602	0.0382201	0.0156033
	544.723	0.300223	0.286891	0.307602	0.259278	0.274107	0.223728	0.275305	0.0280378	0.0114464
	545.348	0.256234	0.2532	0.361453	0.218761	0.221966	0.249894	0.260251	0.047613	0.0194379
	545.974	0.286457	0.284069	0.381866	0.263226	0.24835	0.321194	0.297527	0.0439162	0.0179287
	546.599	0.3009	0.312031	0.330238	0.254857	0.257361	0.245972	0.28356	0.0321798	0.0131373
	547.224	0.290727	0.28672	0.29308	0.222581	0.205281	0.200062	0.249742	0.0410443	0.0167562
	547.849	0.26215	0.250634	0.319798	0.244642	0.239482	0.272483	0.264865	0.0268913	0.0109783
	548.475	0.245104	0.284155	0.281296	0.25726	0.239441	0.25205	0.259884	0.017089	0.00697655
	549.1	0.259541	0.269105	0.28326	0.230994	0.218423	0.215322	0.246107	0.0259238	0.0105834
	549.725	0.267163	0.259356	0.270443	0.226702	0.212652	0.272483	0.251467	0.0232031	0.00947264
	550.35	0.277136	0.25662	0.306465	0.213783	0.175739	0.232867	0.243768	0.0425352	0.0173649
	550.975	0.275594	0.24824	0.276077	0.255715	0.208481	0.226918	0.248504	0.0245424	0.0100194
	551.601	0.264017	0.237209	0.226515	0.234341	0.211376	0.189501	0.22716	0.0230172	0.00939673
	552.226	0.270015	0.243451	0.243105	0.211293	0.194428	0.212994	0.229214	0.0253464	0.0103476
	552.851	0.24632	0.246273	0.251632	0.193997	0.187969	0.18838	0.219095	0.0290994	0.0118798
	553.476	0.234632	0.261494	0.247704	0.183868	0.173471	0.250843	0.225335	0.034045	0.0138988
	554.101	0.228975	0.262435	0.228376	0.215628	0.210526	0.212563	0.226417	0.0176471	0.00720439
	554.726	0.207177	0.206596	0.257523	0.142922	0.172904	0.173766	0.193481	0.0361231	0.0147472
	555.352	0.21778	0.211726	0.20822	0.164168	0.196514	0.183638	0.197008	0.0183998	0.0075117
	555.977	0.23118	0.214292	0.257523	0.19846	0.169158	0.146178	0.202798	0.0371681	0.0151738
	556.602	0.222808	0.213266	0.23127	0.181035	0.15547	0.152946	0.192799	0.0314102	0.0128232
	557.227	0.208966	0.215233	0.266826	0.204126	0.181732	0.131262	0.201357	0.0405024	0.016535
	557.852	0.191532	0.218396	0.249513	0.171207	0.155814	0.14247	0.188155	0.0367674	0.0150102
	558.478	0.206393	0.230454	0.216903	0.169919	0.171932	0.185405	0.196834	0.0227286	0.00927893
	559.103	0.210607	0.201978	0.219383	0.176056	0.168814	0.194975	0.195302	0.017939	0.00732358
	559.728	0.20521	0.204458	0.222794	0.160176	0.170413	0.183724	0.191129	0.021682	0.00885166
	560.353	0.189053	0.199498	0.210908	0.200521	0.153586	0.122727	0.179382	0.031129	0.0127084
	560.978	0.177569	0.157256	0.204551	0.159017	0.162334	0.177215	0.17299	0.0162853	0.00664846
	561.604	0.187192	0.179489	0.217678	0.172923	0.138562	0.169671	0.177586	0.0234894	0.0095895
	562.229	0.171202	0.178634	0.227704	0.152708	0.143462	0.201571	0.179213	0.0285668	0.0116623
	562.854	0.197341	0.180686	0.207548	0.12524	0.130483	0.18144	0.170456	0.0315339	0.0128737
	563.479	0.168859	0.140837	0.182483	0.109402	0.148909	0.129926	0.146736	0.0240943	0.00983645
	564.105	0.160949	0.175213	0.191786	0.14391	0.128741	0.193811	0.165735	0.0238906	0.00975328
	564.73	0.184333	0.152809	0.181553	0.167472	0.118232	0.122555	0.154492	0.0262325	0.0107094
	565.355	0.164684	0.142462	0.170287	0.129532	0.126109	0.157515	0.148431	0.0169087	0.00690296
	565.98	0.140685	0.205313	0.207548	0.158502	0.121047	0.144928	0.163004	0.0326084	0.0133123
	566.605	0.136374	0.146396	0.167444	0.143995	0.125542	0.147902	0.144609	0.0126967	0.00518341
	567.231	0.127209	0.190178	0.17654	0.157	0.122363	0.138332	0.151937	0.0250482	0.0102259
	567.856	0.142926	0.167688	0.17561	0.173267	0.12046	0.178939	0.159815	0.0211827	0.00864779
	568.481	0.155042	0.136476	0.168943	0.128201	0.106832	0.167861	0.143893	0.0223645	0.00913026
	569.106	0.127384	0.133655	0.132354	0.151506	0.128114	0.120055	0.132178	0.0096806	0.00395209
	569.731	0.133341	0.173332	0.152612	0.121849	0.10665	0.110528	0.133052	0.0235764	0.00962502
	570.356	0.144166	0.153493	0.156747	0.124467	0.115823	0.107036	0.133622	0.018922	0.00772486
	570.982	0.155762	0.142804	0.181812	0.136356	0.102458	0.109364	0.138093	0.026907	0.0109847
	571.607	0.124295	0.133655	0.13318	0.116184	0.117888	0.196915	0.137019	0.0276153	0.0112739
	572.232	0.132334	0.169655	0.158969	0.104166	0.11319	0.131521	0.134972	0.0231699	0.00945908
	572.857	0.133035	0.149132	0.13349	0.106913	0.11157	0.142514	0.129442	0.0153559	0.00626901
	573.482	0.141995	0.131089	0.127702	0.0885432	0.124388	0.134108	0.124638	0.0170531	0.00696191
	574.108	0.134334	0.154434	0.1584	0.0869123	0.10829	0.066946	0.118219	0.0338954	0.0138377
	574.733	0.116239	0.137075	0.176127	0.107085	0.122991	0.140358	0.133312	0.0222965	0.00910253
	575.358	0.118134	0.125018	0.163723	0.117128	0.110254	0.119408	0.125611	0.0175836	0.00717847
	575.983	0.121445	0.123906	0.165532	0.124982	0.102539	0.127771	0.127696	0.0188204	0.00768339
	576.609	0.133083	0.10116	0.124033	0.112106	0.107035	0.117942	0.115893	0.010613	0.00433276
	577.234	0.135528	0.11946	0.157987	0.0863973	0.106792	0.104019	0.118364	0.0231926	0.00946834
	577.859	0.115017	0.145541	0.158659	0.0818049	0.110376	0.0682823	0.11328	0.0319554	0.0130457
	578.484	0.123158	0.134168	0.140054	0.0960542	0.101345	0.0908276	0.114268	0.0190969	0.00779626
	579.109	0.119135	0.103212	0.139847	0.102921	0.0995629	0.0713861	0.106011	0.0207162	0.00845734
	579.735	0.113904	0.129636	0.127082	0.105067	0.0912407	0.0633681	0.10505	0.0227169	0.00927412
	580.36	0.110361	0.107574	0.129046	0.102664	0.0778968	0.122425	0.108328	0.016283	0.0066475
	580.985	0.119096	0.106889	0.12548	0.11451	0.110436	0.0594453	0.105976	0.0216456	0.00883678
	581.61	0.109262	0.119118	0.140726	0.0704311	0.0966269	0.114494	0.108443	0.0215171	0.00878434
	582.235	0.106583	0.125787	0.104756	0.105797	0.0955739	0.12471	0.110535	0.0110217	0.0044996
	582.861	0.115284	0.0905567	0.108477	0.0868265	0.103471	0.0785419	0.0971928	0.0128672	0.00525302
	583.486	0.105385	0.114329	0.125738	0.0948954	0.0882034	0.103199	0.105292	0.0122761	0.0050117
	584.111	0.0912218	0.123906	0.105841	0.0498297	0.102884	0.0595315	0.0888691	0.0261482	0.010675
	584.736	0.104419	0.100733	0.104084	0.100089	0.105212	0.0838872	0.0997374	0.00733859	0.00299597
	585.361	0.111489	0.116638	0.100157	0.0827491	0.121351	0.0642733	0.0994426	0.0201527	0.00822732
	585.986	0.0942569	0.0802953	0.132043	0.0769979	0.0847206	0.0820767	0.0917318	0.0188045	0.00767692
	586.612	0.0905803	0.0929511	0.0982961	0.05395	0.105374	0.107898	0.0915083	0.017891	0.00730398
	587.237	0.0929813	0.096286	0.134524	0.0483275	0.099158	0.100742	0.0953365	0.0251521	0.0102683
	587.862	0.100516	0.0787561	0.116436	0.0772124	0.124975	0.078154	0.0960083	0.0193493	0.00789934
	588.487	0.0974236	0.101246	0.120364	0.0804743	0.0915242	0.0747485	0.0942967	0.0148236	0.00605169
	589.112	0.100933	0.0797823	0.14393	0.062491	0.123517	0.10626	0.102819	0.0267425	0.0109176
	589.738	0.0681869	0.085426	0.127702	0.0687573	0.0837284	0.0756537	0.0849091	0.0202447	0.00826487
	590.363	0.085617	0.112704	0.113387	0.0751952	0.106812	0.0663425	0.093343	0.0186015	0.00759401
	590.988	0.0966542	0.10193	0.0832571	0.0885003	0.0798204	0.0319857	0.0803579	0.0228975	0.00934786
	591.613	0.0727702	0.0605422	0.104756	0.0559243	0.0938123	0.0868617	0.0791111	0.0175903	0.0071812
	592.238	0.0653335	0.109797	0.121191	0.0663967	0.103815	0.0643165	0.0884749	0.0236885	0.00967078
	592.864	0.0836461	0.0842288	0.112095	0.0878565	0.0985303	0.0669891	0.0888909	0.0139125	0.00567974
	593.489	0.0767249	0.0796113	0.096694	0.0607313	0.0983885	0.0759986	0.0813581	0.0129353	0.00528082
	594.114	0.0671857	0.0867942	0.141139	0.0768691	0.125481	0.0483236	0.0909655	0.0324259	0.0132378
	594.739	0.0723919	0.099792	0.0885801	0.07159	0.102094	0.105226	0.0899456	0.0136927	0.00559001
	595.365	0.0973644	0.0773023	0.0869781	0.0456235	0.0979835	0.0596609	0.0774855	0.0193149	0.00788526
	595.99	0.0810263	0.0710601	0.091681	0.0573407	0.0987125	0.113631	0.0855753	0.0183739	0.0075011
	596.615	0.0686523	0.0838868	0.0905957	0.0674697	0.0817441	0.0574192	0.0749613	0.011356	0.00463608
	597.24	0.0693735	0.0693498	0.0962806	0.0556668	0.0983277	0.0654804	0.0757465	0.0159252	0.00650146
	597.865	0.070002	0.0790126	0.0777273	0.0558384	0.0844776	0.0760848	0.0738572	0.00911821	0.00372249
	598.49	0.0690769	0.0616539	0.075195	0.0596583	0.0784435	0.0804817	0.0707515	0.00798142	0.0032584
	599.116	0.0649924	0.067041	0.0824303	0.0547654	0.110538	0.0700497	0.0749694	0.0178679	0.00729455
	599.741	0.0528891	0.0636206	0.0843424	0.0906034	0.0895803	0.0711274	0.0753605	0.0139996	0.00571532
	600.366	0.0727998	0.0866233	0.0911125	0.0691436	0.0982063	0.0328911	0.0751294	0.021391	0.00873283
	600.991	0.0726941	0.0849129	0.0931281	0.0734784	0.100049	0.0941899	0.0864087	0.0104025	0.0042468
	601.616	0.0581713	0.0650742	0.06274	0.0689719	0.105678	0.0335808	0.0657027	0.0212384	0.00867055
	602.242	0.0588313	0.0731124	0.0874432	0.0568685	0.0907143	0.04772	0.069115	0.0159787	0.00652326
	602.867	0.0607114	0.0637916	0.0804664	0.080646	0.0810354	0.0592298	0.0709801	0.00982955	0.0040129
	603.492	0.0663421	0.0621669	0.102896	0.09026	0.0935491	0.0647475	0.0799935	0.0160741	0.0065622
	604.117	0.0604295	0.0586609	0.0737996	0.032576	0.0918279	0.0334083	0.0584504	0.0210167	0.00858003
	604.742	0.054821	0.0584045	0.0981928	0.0546797	0.0864823	0.0858702	0.0730751	0.0176125	0.00719026
	605.368	0.057463	0.0794402	0.0862029	0.0557526	0.100353	0.0648338	0.0740075	0.0161422	0.00659003
	605.993	0.0487211	0.0853405	0.0791743	0.0584136	0.0927188	0.0724207	0.0727982	0.0151743	0.0061949
	606.618	0.0518767	0.059687	0.0906474	0.0466966	0.0800634	0.0469872	0.0626597	0.0168906	0.00689556
	607.243	0.0601422	0.0998774	0.0871848	0.0570402	0.086867	0.0414263	0.0720896	0.0205258	0.00837964
	607.869	0.0556961	0.0638771	0.0844974	0.0677272	0.0965864	0.0483667	0.0694585	0.0164849	0.00672993
	608.494	0.0492439	0.0463473	0.0551429	0.0472116	0.0837689	0.0168981	0.0497688	0.0195102	0.00796501
	609.119	0.0421021	0.0778154	0.0959705	0.0533491	0.0936706	0.0792317	0.0736899	0.0198113	0.00808792
	609.744	0.0674768	0.0612263	0.0821201	0.0666113	0.0720044	0.0325462	0.0636642	0.0153171	0.00625317
	610.369	0.0485079	0.0796967	0.0847558	0.0494005	0.0733813	0.0568588	0.0654335	0.0144742	0.00590907
	610.995	0.0456007	0.0694353	0.0573135	0.0531774	0.0761149	0.0557811	0.0595705	0.0102185	0.0041717
	611.62	0.0496203	0.0608842	0.0743163	0.0534779	0.063662	0.0429782	0.0574898	0.0101765	0.00415452
	612.245	0.0585235	0.0684093	0.0934898	0.0393144	0.0773906	0.0435386	0.0634444	0.0188175	0.00768221
	612.87	0.0498446	0.0467748	0.0634635	0.0490142	0.0581745	0.0362534	0.0505875	0.00862541	0.00352131
	613.495	0.0433258	0.0570361	0.0675979	0.0171679	0.0602197	0.0650493	0.0517328	0.0172945	0.00706044
	614.12	0.0575872	0.0675541	0.0859444	0.0442931	0.0654033	0.0507807	0.0619271	0.0133829	0.00546356
	614.746	0.0502915	0.0660148	0.0826369	0.0529199	0.063662	0.0381933	0.0589531	0.0139962	0.00571391
	615.371	0.0627249	0.0836303	0.0667194	0.0359667	0.0900056	0.0247006	0.0606246	0.0235676	0.00962145
	615.996	0.0465667	0.0402759	0.0592257	0.0146785	0.0733003	0.0532378	0.0478808	0.0180993	0.00738901
	616.621	0.0481019	0.0704615	0.0877533	0.0200006	0.0603614	0.0387106	0.0542315	0.0218896	0.00893639
	617.246	0.0475067	0.0542142	0.0556598	0.0324473	0.0682382	0.051729	0.0516325	0.010675	0.00435806
	617.872	0.044848	0.0561811	0.0766937	0.0249363	0.0524037	0.0194415	0.0457507	0.0193078	0.00788238
	618.497	0.0498094	0.044808	0.0635669	0.0445935	0.0615156	0.0313823	0.0492793	0.010927	0.00446093
	619.122	0.0496277	0.0408746	0.0770038	0.0449369	0.0580936	0.0574192	0.0546593	0.0117512	0.00479743
	619.747	0.0421114	0.05182	0.0616547	0.0233054	0.0516342	0.0816457	0.0520286	0.0177642	0.00725222
	620.372	0.0435093	0.0578058	0.0685798	0.036868	0.0596932	0.0319858	0.0497403	0.0131579	0.00537169
	620.998	0.0510535	0.0356583	0.0513186	0.0373401	0.0706073	0.0210796	0.0445096	0.0155402	0.00634426
	621.623	0.0522735	0.0558391	0.0643938	0.0287562	0.0604626	0.0712136	0.0554898	0.013394	0.00546809
	622.248	0.0421132	0.0590885	0.0652207	0.0230049	0.0613334	0.0110787	0.0436399	0.0204361	0.00834302
	622.873	0.0345134	0.0419007	0.0455304	0.0248076	0.0732801	0.0243127	0.0407241	0.0165611	0.00676104
	623.498	0.0400867	0.0404469	0.0468224	0.0533921	0.062528	0.0220711	0.0442245	0.0125697	0.00513154
	624.124	0.0477848	0.0790126	0.0493547	0.0132192	0.0527277	0.0207778	0.0438128	0.0217239	0.00886875
	624.749	0.0398124	0.0435253	0.040259	0.0178546	0.0554207	0.0194415	0.0360522	0.0133535	0.00545153
	625.374	0.0491957	0.0748225	0.050595	0.0397006	0.0548538	0.0343136	0.0505802	0.0128507	0.00524626
	625.999	0.0372333	0.0492546	0.0625849	0.0275974	0.0644921	0.0401763	0.0468898	0.0133684	0.00545764
	626.625	0.0443177	0.0428413	0.0501817	0.0223182	0.0580733	0.0169413	0.0391123	0.0147006	0.0060015
	627.25	0.0386276	0.0568651	0.0622232	0.0369109	0.043231	0.0282785	0.0443561	0.0117169	0.00478339
	627.875	0.0431923	0.0566086	0.0654274	0.0221895	0.0567369	0.0134927	0.0429412	0.0190642	0.00778292
	628.5	0.0408191	0.0618248	0.0510602	0.0209448	0.0585188	4.31291e-05	0.0388685	0.021963	0.00896635
	629.125	0.0445198	0.0355729	0.0382435	0.039529	0.0625888	0.0598332	0.0467145	0.0106179	0.00433473
	629.75	0.038928	0.051649	0.0647555	0.0452373	0.0519987	0.0369001	0.0482448	0.00933483	0.00381093
	630.376	0.0498187	0.0492546	0.0422229	0.0194426	0.0448307	0.0297011	0.0392118	0.0110701	0.00451933
	631.001	0.0415885	0.0459197	0.0648072	0.0314601	0.0628723	0.0410384	0.0479477	0.0120493	0.00491911
	631.626	0.0537104	0.0365989	0.046409	0.0234341	0.0314462	0.0379778	0.0382627	0.00978258	0.00399372
	632.251	0.0258809	0.0528461	0.0459956	0.0188417	0.0421376	0.0465993	0.0387169	0.0121534	0.00496161
	632.876	0.0433054	0.0579768	0.0530757	0.0167815	0.0418946	-0.000646613	0.0353979	0.0207076	0.00845383
	633.502	0.0418295	0.0599435	0.0319385	0.030988	0.0386953	0.0587987	0.0436989	0.0116926	0.00477347
	634.127	0.0364361	0.0468603	0.0682181	0.0097428	0.0345241	0.0187087	0.0357483	0.0189137	0.00772149
	634.752	0.0400311	0.0362569	0.0533342	0.0191422	0.0309198	-0.00258645	0.0295163	0.0176232	0.00719465
	635.377	0.0424878	0.0272782	0.065324	0.0120175	0.039647	0.034055	0.0368016	0.0161578	0.00659639
	636.003	0.0291422	0.0469458	0.0325586	0.0264815	0.0396875	0.0224591	0.0328791	0.0082442	0.00336568
	636.628	0.025423	0.0347177	0.0588122	0.0151077	0.0408619	0.0444439	0.0365611	0.0139251	0.0056849
	637.253	0.037619	0.0300145	0.0606728	0.0145926	0.0510673	0.0103458	0.034052	0.0181101	0.00739343
	637.878	0.0364361	0.0431834	0.040414	0.00613749	0.0467543	0.0076731	0.0300997	0.0166945	0.00681549
	638.503	0.0364657	0.0344612	0.0503367	0.0182409	0.0418136	0.017243	0.0330935	0.0119614	0.00488322
	639.129	0.0312855	0.0349741	0.0448586	0.0265673	0.0274168	0.00318994	0.0280487	0.0126594	0.00516818
	639.754	0.0301322	0.0394208	0.0394322	0.016009	0.0442839	0.0430644	0.0353904	0.00977968	0.00399254
	640.379	0.0307478	0.0511358	0.0416544	0.0103007	0.0415706	-0.0137513	0.026943	0.0222229	0.00907247
	641.004	0.031749	0.0366844	0.054161	0.0226616	0.0390193	0.0197433	0.0340031	0.0113706	0.00464203
	641.629	0.0337198	0.0390788	0.0612413	0.0136484	0.0339774	0.0503496	0.0386692	0.0148248	0.00605219
	642.255	0.0231127	0.0310407	0.0356595	0.0273828	0.0367312	0.0156049	0.0282553	0.00732189	0.00298915
	642.88	0.0287565	0.0377961	0.0505434	0.00772554	0.0343216	0.0232781	0.0304035	0.0131871	0.0053836
	643.505	0.0296743	0.0209503	0.0400006	0.0144639	0.0397685	-0.00918191	0.0226126	0.0169636	0.00692537
	644.13	0.0217	0.0188126	0.0264087	0.0264815	0.0294821	0.0325893	0.0259124	0.00458341	0.00187117
	644.755	0.0287955	0.0350597	0.0595875	0.0348079	0.0310413	0.0354775	0.0374615	0.0101868	0.00415875
	645.38	0.021268	0.0501097	0.0484245	0.0215886	0.0345646	0.0278906	0.0339743	0.0117003	0.00477661
	646.006	0.0330376	0.0400194	0.0457371	0.0259234	0.0452356	0.0179328	0.0346477	0.0101819	0.00415675
	646.631	0.0169462	0.022575	0.0487346	0.027254	0.0304338	-0.0150446	0.0218165	0.0191983	0.00783766
	647.256	0.0282615	0.0295015	0.0606727	0.021932	0.0366299	0.028063	0.0341768	0.0125977	0.005143
	647.881	0.0248611	0.033606	0.045117	0.0265243	0.0297454	0.0190535	0.0298179	0.00816197	0.00333211
	648.506	0.0204058	0.0188126	0.0453754	0.0140347	0.0368527	0.0329341	0.0280692	0.0111183	0.00453902
	649.132	0.0259124	0.0323234	0.0459439	0.0257947	0.0325599	0.00383661	0.0277285	0.0126103	0.00514813
	649.757	0.0204874	0.0159051	0.0494581	0.016567	0.0209776	0.0123287	0.0226207	0.0123502	0.00504196
	650.382	0.0318788	0.0240287	0.0494065	0.00716756	0.0361642	0.0322875	0.0301555	0.0127815	0.00521803
	651.007	0.0301675	0.0363425	0.0585539	0.0103865	0.0373184	-0.00982852	0.0271567	0.0217241	0.00886884
	651.632	0.0287584	0.043953	0.0609312	0.0183697	0.0305351	0.0181914	0.0334564	0.0150348	0.00613794
	652.258	0.0191395	0.0188126	0.0487346	0.01279	0.0351518	0.0198726	0.0257502	0.0123222	0.00503051
	652.883	0.0225602	0.0123992	0.0416027	0.0228332	0.0302718	0.00314687	0.0221357	0.0122556	0.00500334
	653.508	0.022195	0.0316393	0.0585021	0.013863	0.0230633	0.0299597	0.0298704	0.0140499	0.00573585
	654.133	0.0269599	0.0254823	0.0760735	0.000557913	0.0288139	0.0131478	0.0285059	0.023421	0.00956159
	654.759	0.0198441	0.0320668	0.0574686	0.0125754	0.0207954	-0.007199	0.0225919	0.0195992	0.00800132
	655.384	0.0178379	0.0253114	0.0404141	0.0169532	0.0269105	0.0211658	0.0247655	0.00787145	0.00321351
	656.009	0.0236486	0.0261665	0.0222742	0.0190134	0.0374601	0.00819045	0.0227922	0.00870848	0.00355522
	656.634	0.0251151	0.0188981	0.0395872	0.0172966	0.0341799	0.00198297	0.0228433	0.0122169	0.00498754
	657.259	0.0238155	0.0456632	0.0649105	0.0133051	0.0348885	0.004009	0.0310986	0.0203029	0.00828861
	657.885	0.0129803	0.0185559	0.0433599	0.0144639	0.0208967	-0.0155618	0.0157825	0.017255	0.00704433
	658.51	0.0226344	0.0315538	0.0578304	0.0281982	0.0212207	-0.00103458	0.0267338	0.0173717	0.00709196
	659.135	0.0174393	0.0507938	0.051422	0.00686717	0.0285102	-0.0116822	0.0238917	0.0227301	0.00927952
	659.76	0.0121794	0.0312972	0.0341091	0.0227903	0.0239745	-0.00788868	0.0194103	0.0140661	0.00574246
	660.385	0.0253803	0.0237722	0.0405691	0.0181121	0.0166444	0.00413832	0.0214361	0.0109568	0.00447309
	661.01	0.0195548	0.0135108	0.0242898	0.00107295	0.0195603	0.0251317	0.0171867	0.00814435	0.00332492
	661.636	0.0220244	0.0176153	0.0216541	0.00557958	0.0157737	-0.00694029	0.0126178	0.0103048	0.0042069
	662.261	0.0263351	0.0200097	0.0414994	0.0105153	0.0229216	-0.0103027	0.0184964	0.0158406	0.00646688
	662.886	0.0248611	0.0273636	0.0420679	0.0151077	0.0190135	0.0216831	0.0250162	0.00857918	0.00350243
	663.511	0.0261719	0.0239433	0.0250133	0.0166099	0.0142551	0.0116822	0.0196126	0.00565034	0.00230674
	664.136	0.0110502	0.0221475	0.0457888	-0.00214603	0.0264651	0.0175016	0.0201345	0.0146523	0.0059818
	664.762	0.0202482	0.0277057	0.030233	0.005365	0.0293606	0.00564707	0.0197599	0.01058	0.00431927
	665.387	0.0238395	0.0388221	0.0275973	0.00429192	0.0219091	0.00810426	0.0207607	0.0116559	0.0047585
	666.012	0.0211197	0.0169313	0.0433598	0.000772554	0.032398	0.0120701	0.0211086	0.0137554	0.00561562
	666.637	0.00930557	0.00752506	0.0262536	0.0121033	0.0101041	-0.0184501	0.00780693	0.0132651	0.00541544
	667.263	0.0172261	0.032922	0.0235146	0.0200005	0.0205525	0.0228039	0.0228366	0.0049483	0.00202013
	667.888	0.00826544	0.0177864	0.0463057	0.00596585	0.0199652	0.0020261	0.0167191	0.014663	0.00598615
	668.513	0.0176173	0.0163327	0.0427914	0.00746802	0.0233063	-0.0043539	0.0171936	0.0144477	0.00589824
	669.138	0.016503	0.00949178	0.0427914	0.00545075	0.0159965	-0.0114235	0.013135	0.0161991	0.00661326
	669.763	0.010824	0.0194111	0.0256851	0.0269536	0.0239138	-0.0051729	0.0169358	0.0112389	0.00458825
	670.389	0.0220022	0.0291594	0.0418611	0.00553664	0.0219091	-0.00232781	0.0196901	0.0145865	0.00595492
	671.014	0.0230868	0.0181284	0.0526623	-0.00188844	0.0150853	0.0216399	0.0214524	0.0161923	0.00661049
	671.639	0.00925735	0.0206082	0.0373133	0.00914189	0.0182846	-0.0193984	0.0125345	0.0170987	0.00698052
	672.264	0.0102048	0.0223185	0.0410342	-0.00476408	0.0133034	0.00237094	0.014078	0.0147322	0.00601439
	672.889	0.0106238	0.0230881	0.0286826	-0.00141635	0.0162395	0.00646613	0.0139473	0.0100747	0.00411297
	673.514	0.024609	0.0129977	0.0467707	0.0161377	0.0103471	0.00939749	0.0200433	0.0129579	0.00529004
	674.14	0.00989514	0.0173588	0.0374683	0.000557977	0.0124327	-0.0163809	0.010222	0.0163268	0.0066654
	674.765	0.0109594	0.0198386	0.0349876	0.000729613	0.0134046	0.00504358	0.0141606	0.0111081	0.00453485
	675.39	0.0151903	0.0142804	0.0300264	0.0050216	0.0073098	-0.00469874	0.0111883	0.010692	0.00436501
	676.015	0.014864	0.0128267	0.0424813	-0.00206014	0.0215447	0.0147859	0.0174071	0.0132861	0.00542403
	676.64	0.00860471	0.0183849	0.0191734	0.00347649	0.0139311	-0.0189674	0.00743388	0.0130001	0.00530726
	677.266	0.0147324	0.00786715	0.0230494	0.0124896	0.00791723	0.000258645	0.0110524	0.00702397	0.00286752
	677.891	0.0144209	0.00974831	0.0333856	0.0291424	0.00589238	-0.0205192	0.0120117	0.0175923	0.00718202
	678.516	0.00392134	0.00376246	0.0238246	0.0100432	0.0156928	-0.0199588	0.00621426	0.0136071	0.00555509
	679.141	0.0115842	0.0166747	0.0323519	0.00845521	0.00530517	0.00599197	0.0133939	0.00929203	0.00379346
	679.766	0.0190023	0.00487416	0.0233078	-0.00553664	0.0176366	0.0126736	0.011993	0.00972484	0.00397015
	680.392	0.0136051	0.014879	0.0248066	0.00540788	0.0170292	0.0124581	0.0146976	0.00577594	0.00235802
	681.017	0.0107109	0.0118861	0.0207239	0.0129618	0.000607461	0.000431097	0.00955355	0.00714638	0.0029175
	681.642	0.0169796	0.0138529	0.0156592	0.0138631	0.00255134	-0.00926816	0.00893964	0.00940307	0.00383879
	682.267	0.0107072	0.00436109	0.0128684	0.0107728	0.00749203	0.00732826	0.00892164	0.00281583	0.00114956
	682.892	0.00309812	0.0113731	0.0248066	-0.0051933	0.00269309	0.000775936	0.00625892	0.00960983	0.0039232
	683.518	0.0133771	0.00607128	0.035246	0.00424905	0.0123112	0.0215107	0.0154609	0.0104577	0.00426934
	684.143	0.0134679	0.0032494	0.0266671	-0.0102578	0.014984	-0.000474161	0.00793941	0.0119362	0.00487294
	684.768	0.0149308	0.0253115	0.0149357	-0.000643795	0.0174341	0.00512978	0.0128497	0.00843275	0.00344265
	685.393	0.0128654	0.00880773	0.0167444	0.0126184	0.0109343	-0.00491426	0.00950933	0.00687797	0.00280792
	686.019	0.0103623	0.0131688	0.0098193	0.00952816	0.0134249	-0.0162084	0.00668252	0.0103522	0.00422625
	686.644	0.00688041	0.00384802	0.0264086	0.00515036	0.00720856	-0.0176309	0.00531084	0.0127781	0.00521662
	687.269	0.00620556	0.0111165	0.0182432	0.00287564	0.0128984	0.00952681	0.0101444	0.00487938	0.001992
	687.894	0.0138387	0.0204372	0.0067184	0.0146785	0.00506219	0.01401	0.0124575	0.00517292	0.00211184
	688.519	0.0135662	0.00256535	0.0185532	0.00570827	0.00959789	0.0119408	0.010322	0.00521017	0.00212704
	689.144	0.00662085	0.0125702	0.0157108	-0.0050216	0.0145183	0.0202175	0.0107693	0.00813989	0.00332309
	689.77	0.0118864	0.0100903	0.0197936	-0.00532206	0.0139716	-0.00521597	0.00753399	0.00953117	0.00389109
	690.395	0.0197773	0.0102614	0.028786	0.0177687	0.00761353	-0.00715587	0.0128418	0.0112583	0.00459617
	691.02	0.0100583	0.0074395	0.0207755	-0.00364819	0.00781602	0.0134927	0.0093223	0.00733891	0.0029961
	691.645	0.0114619	0.00632781	0.0121449	-0.00412029	0.0120277	0.00215536	0.00666623	0.00603561	0.00246403
	692.27	0.00827097	0.0138529	0.0298713	0.00420617	0.00779577	0.0131046	0.0128503	0.00828678	0.00338306
	692.896	0.0137442	0.00769604	0.00687352	0.000643795	0.00532543	-0.0165102	0.00296212	0.00952273	0.00388764
	693.521	0.0090219	0.0145369	0.00930247	-0.00343355	0.0170089	0.00607816	0.00875247	0.00655305	0.00267527
	694.146	0.00446826	0.0159907	0.0155557	0.0028327	0.00658084	-0.0164671	0.00482686	0.010804	0.0044107
	694.771	0.013429	0.00752493	0.022636	0.016524	0.00441421	-0.00465561	0.00997876	0.00881382	0.00359823
	695.396	0.0114043	0.00367704	0.0122483	-0.00309021	0.00720853	-0.01401	0.00290633	0.00913519	0.00372943
	696.022	0.00647996	0.015734	0.015039	0.000343336	0.011157	-0.0330635	0.00261498	0.0167952	0.00685663
	696.647	0.0158986	0.00914969	0.0184499	-0.00763972	0.0063986	-0.00913884	0.0055197	0.0106215	0.00433623
	697.272	0.00830809	0.0139383	0.0303364	0.0104724	0.0100636	-0.00482807	0.0113818	0.0103327	0.00421829
	697.897	0.00857133	0.0205228	0.00733856	-0.0108587	0.00597338	-0.00250019	0.00484119	0.00972734	0.00397117
	698.523	0.00850089	0.0105179	0.0109046	0.00798306	0.0126554	-0.0141824	0.00606325	0.0091856	0.00375001
	699.148	0.00176321	0.0245418	0.00775206	-0.00699592	0.00822096	-0.00788868	0.00456556	0.0109483	0.00446963
	699.773	0.0013924	0.0229171	0.0155557	0.010687	0.0139716	-0.023666	0.00680964	0.0150576	0.00614724
	700.398	0.00973013	0.0131687	0.0178297	-0.00484996	0.00374603	-0.00918191	0.00507379	0.00960375	0.00392071
	pHo=7
	Wavelenght (nm)	Exp_1	Exp_2	Exp_3	Exp_4	Exp_5	Exp_6	Average	S.D.	S.E.M.
	405.929	-3.51452e-05	0.00899447	0.00892739	-0.00134932	0.00435445	-0.0161651	0.000787792	0.00855344	0.00349193
	406.554	-0.00121434	0.0210491	0.0121236	0.00193963	0.000223283	-0.0105838	0.00392292	0.0101243	0.00413325
	407.179	0.00012207	0.0194728	0.00799059	-0.00172882	0.00285833	-0.00310072	0.00426904	0.00768633	0.00313793
	407.805	0.000588767	0.0102001	0.00650269	0.00290951	0.000223316	0.000248057	0.00344541	0.00374223	0.00152776
	408.43	-0.00243705	0.00890183	0.00292066	-0.000801192	0.000513591	-0.000950866	0.00135783	0.00375188	0.0015317
	409.055	-0.000692454	0.0111273	0.00214919	-0.0024457	0.00223306	0.00806187	0.00340554	0.00474852	0.00193857
	409.68	0.000451599	0.00157646	0.00473929	0.00586122	-0.00312626	-0.00107489	0.00140457	0.00312506	0.0012758
	410.305	-0.00100023	0.0142801	0.0109664	0.00189751	-0.000759249	-0.00268727	0.00378287	0.00646427	0.00263903
	410.93	0.00395575	0.0175255	0.0141075	-0.0018132	-0.000647608	-0.00161237	0.00525259	0.00777368	0.00317359
	411.556	0.000178967	0.0254074	0.00556581	0.0032047	0.00218838	0.00607741	0.00710377	0.00842375	0.00343898
	412.181	0.00131133	0.0112199	0.0108011	0.00442752	-0.000491283	0.00438237	0.00527516	0.0044037	0.0017978
	412.806	-0.00131133	0.0082527	0.00832124	0.00177101	-0.00107187	0.00752445	0.00391437	0.0042434	0.00173236
	413.431	0.000827959	0.0116837	0.00484947	-0.00312033	0.00189811	0.00921949	0.00422639	0.00503115	0.00205396
	414.057	0.00286357	0.00704733	0.00683334	-0.0018132	0.00544866	0.00868201	0.00484362	0.00346767	0.00141567
	414.682	0.00771083	0.0217909	0.0176895	0.00375289	0.0157207	0.00744172	0.0123511	0.00643589	0.00262744
	415.307	0.00567522	0.0192872	0.0050148	0.0107526	0.021482	0.00558129	0.0112988	0.00672821	0.00274678
	415.932	0.00295889	0.0362565	0.00765995	-0.00990924	0.0195838	0.0183149	0.0124775	0.0145201	0.00592779
	416.557	0.0066119	0.0453437	0.0139972	0.0199871	0.0274442	0.0170333	0.0217362	0.0122727	0.00501029
	417.183	0.0210249	0.0516493	0.0352136	0.00978274	0.0295656	0.0555649	0.0338002	0.0160845	0.00656647
	417.808	0.0144515	0.0475692	0.0255699	0.0223484	0.0452417	0.0601539	0.0358891	0.0161353	0.0065872
	418.433	0.0213494	0.0367201	0.0293723	0.0355889	0.0608284	0.0764843	0.0433905	0.0190917	0.00779416
	419.058	0.0324104	0.0585111	0.0498721	0.031077	0.0682867	0.070655	0.051802	0.0157135	0.00641499
	419.683	0.039111	0.0624055	0.0294824	0.0302336	0.0858162	0.0983548	0.0575672	0.0269616	0.011007
	420.308	0.0554425	0.0659292	0.0479985	0.0546483	0.0852803	0.114437	0.0706226	0.0229276	0.00936016
	420.934	0.0471011	0.108028	0.0509192	0.0756474	0.100845	0.14871	0.0885417	0.0352382	0.0143859
	421.559	0.0673533	0.103669	0.0693251	0.0689428	0.101358	0.155449	0.0943497	0.0312775	0.012769
	422.184	0.0903201	0.127686	0.0654675	0.113387	0.126547	0.187283	0.118448	0.0376673	0.0153776
	422.809	0.0925513	0.153278	0.0819997	0.0933575	0.139856	0.148504	0.118258	0.0294484	0.0120223
	423.435	0.0987953	0.190091	0.0763788	0.115326	0.155353	0.237639	0.145597	0.0554445	0.0226351
	424.06	0.0934563	0.176831	0.098036	0.141175	0.152361	0.207707	0.144928	0.040572	0.0165634
	424.685	0.125935	0.164591	0.0848653	0.121736	0.182619	0.260708	0.156742	0.0560966	0.0229013
	425.31	0.149583	0.190926	0.11027	0.144	0.206647	0.264884	0.177718	0.0501448	0.0204715
	425.935	0.154019	0.21216	0.126637	0.174866	0.215512	0.326195	0.201565	0.063806	0.0260487
	426.56	0.146972	0.26214	0.145483	0.188908	0.242688	0.259385	0.207596	0.0496172	0.0202561
	427.186	0.173458	0.224308	0.141681	0.187432	0.246507	0.283075	0.20941	0.047236	0.019284
	427.811	0.2044	0.242204	0.140689	0.189624	0.265532	0.302093	0.22409	0.0526961	0.0215131
	428.436	0.193775	0.24378	0.176123	0.236177	0.283441	0.235324	0.228103	0.0348945	0.0142456
	429.061	0.224353	0.280779	0.179926	0.224581	0.316982	0.344138	0.261793	0.0572652	0.0233784
	429.687	0.238192	0.305259	0.209077	0.252327	0.297018	0.340004	0.273646	0.0444028	0.0181274
	430.312	0.250303	0.291442	0.240819	0.224328	0.301261	0.372706	0.280143	0.0494869	0.0202029
	430.937	0.243693	0.317499	0.198166	0.245917	0.335561	0.298744	0.273263	0.0478693	0.0195426
	431.562	0.286168	0.243595	0.16951	0.256543	0.354251	0.331942	0.273668	0.0606799	0.0247725
	432.187	0.306172	0.265479	0.271734	0.301704	0.362603	0.27522	0.297152	0.032955	0.0134538
	432.812	0.294698	0.372301	0.219878	0.317938	0.387613	0.313586	0.317669	0.0547483	0.0223509
	433.438	0.30497	0.323248	0.233821	0.280789	0.400565	0.362701	0.317682	0.0539795	0.022037
	434.063	0.28556	0.359319	0.293557	0.356226	0.387546	0.390484	0.345449	0.0416098	0.0169871
	434.688	0.320415	0.361173	0.276198	0.319878	0.380043	0.339673	0.332897	0.0331871	0.0135486
	435.313	0.345395	0.365253	0.268042	0.360906	0.423364	0.480032	0.373832	0.0657936	0.0268601
	435.938	0.372997	0.362101	0.304689	0.344672	0.444333	0.420209	0.374833	0.0463405	0.0189184
	436.564	0.330382	0.361451	0.255092	0.362087	0.477896	0.38821	0.36252	0.0665163	0.0271551
	437.189	0.361991	0.432759	0.323315	0.376044	0.447035	0.416116	0.392877	0.0430888	0.0175909
	437.814	0.373229	0.441846	0.30276	0.432759	0.500472	0.392716	0.407297	0.0616775	0.0251797
	438.439	0.40104	0.463823	0.358804	0.407037	0.526777	0.430628	0.431351	0.0531257	0.0216885
	439.065	0.389663	0.43211	0.304689	0.374737	0.528296	0.462255	0.415291	0.0704661	0.0287677
	439.69	0.401634	0.475506	0.356379	0.505159	0.54616	0.521375	0.467702	0.067402	0.0275167
	440.315	0.431746	0.479957	0.353514	0.408175	0.572041	0.428312	0.445624	0.0677484	0.0276582
	440.94	0.459759	0.473837	0.389554	0.419265	0.570835	0.499918	0.468862	0.0580521	0.0236997
	441.565	0.479354	0.542734	0.357426	0.447222	0.585707	0.589715	0.50036	0.0824207	0.0336481
	442.19	0.461266	0.523354	0.373022	0.473576	0.557035	0.572641	0.493482	0.0672584	0.0274581
	442.816	0.475082	0.558683	0.400465	0.500521	0.616434	0.522822	0.512335	0.067252	0.0274555
	443.441	0.466281	0.583719	0.441079	0.451481	0.654463	0.682489	0.546585	0.0984136	0.0401772
	444.066	0.501	0.57695	0.534045	0.520466	0.595823	0.543452	0.545289	0.0323101	0.0131905
	444.691	0.534087	0.606345	0.530518	0.555886	0.65453	0.574666	0.576005	0.0434345	0.0177321
	445.317	0.554858	0.562299	0.458658	0.54117	0.669514	0.599968	0.564411	0.0634171	0.0258899
	445.942	0.584137	0.568234	0.455683	0.575578	0.623647	0.611089	0.569728	0.0545717	0.0222788
	446.567	0.528538	0.593455	0.485	0.561199	0.703746	0.552755	0.570782	0.0680118	0.0277657
	447.192	0.606164	0.628692	0.515088	0.613317	0.707007	0.708121	0.629732	0.065936	0.0269183
	447.817	0.569445	0.577321	0.479048	0.567861	0.753142	0.700101	0.60782	0.0914839	0.0373481
	448.442	0.660469	0.633421	0.537352	0.641653	0.727729	0.774063	0.662448	0.0748861	0.0305721
	449.068	0.619507	0.688223	0.540052	0.647177	0.772279	0.731521	0.66646	0.0757844	0.0309389
	449.693	0.618097	0.660498	0.497619	0.588565	0.772279	0.789608	0.654444	0.102018	0.0416487
	450.318	0.655398	0.660869	0.612794	0.636678	0.798986	0.724493	0.681536	0.0625673	0.025543
	450.943	0.644907	0.717618	0.530353	0.665899	0.794788	0.794404	0.691328	0.0919549	0.0375404
	451.568	0.661038	0.683309	0.597198	0.662526	0.802023	0.685383	0.681913	0.06114	0.0249603
	452.194	0.697413	0.777056	0.546004	0.732228	0.820513	0.786383	0.726599	0.08985	0.0366811
	452.819	0.69536	0.750165	0.653904	0.681332	0.8453	0.730612	0.726112	0.0618727	0.0252594
	453.444	0.733836	0.779374	0.614833	0.665182	0.854746	0.890195	0.756361	0.0974439	0.0397813
	454.069	0.736796	0.814425	0.59312	0.728939	0.871873	0.751945	0.749516	0.0858634	0.0350536
	454.695	0.726893	0.793469	0.638033	0.760437	0.844295	0.924345	0.781245	0.0899065	0.0367042
	455.32	0.750896	0.843727	0.708295	0.76263	0.862606	0.812057	0.790035	0.0541582	0.02211
	455.945	0.750699	0.769174	0.733534	0.779412	0.843379	0.841576	0.786296	0.0422412	0.0172449
	456.57	0.779823	0.868485	0.646409	0.708066	0.858251	0.84323	0.784044	0.0825367	0.0336955
	457.195	0.823157	0.792263	0.676939	0.774479	0.832147	0.805112	0.784016	0.0515076	0.0210279
	457.82	0.796245	0.80747	0.731164	0.803068	0.92397	0.798373	0.810048	0.0571301	0.0233233
	458.446	0.812944	0.893614	0.805449	0.794719	0.915686	0.726064	0.824746	0.0634616	0.0259081
	459.071	0.835471	0.90298	0.771117	0.85312	0.932724	0.900738	0.866025	0.0534274	0.0218116
	459.696	0.838094	0.890925	0.771227	0.817826	0.976626	0.908924	0.86727	0.0667999	0.0272709
	460.321	0.890477	0.912994	0.769023	0.819176	0.96028	0.887632	0.873264	0.0625095	0.0255194
	460.947	0.877133	0.877851	0.79305	0.877956	0.928682	0.924469	0.879857	0.0445806	0.0182
	461.572	0.84514	0.905762	0.7596	0.846837	0.978211	1.00616	0.890285	0.0840658	0.0343197
	462.197	0.840318	0.872287	0.799553	0.919322	0.988863	0.922815	0.890526	0.0614702	0.0250951
	462.822	0.900938	0.842151	0.824461	0.873782	0.960503	0.941212	0.890508	0.0492602	0.0201104
	463.447	0.895005	0.967611	0.795034	0.879685	1.02765	0.899415	0.910733	0.0726069	0.0296417
	464.072	0.849804	0.895469	0.800489	0.892504	1.02281	0.957378	0.903075	0.0716651	0.0292571
	464.698	0.906596	0.950549	0.835648	0.972537	0.991989	0.947125	0.934074	0.0511827	0.0208952
	465.323	0.911025	0.928665	0.810684	0.885842	0.941902	1.00567	0.913964	0.0589804	0.0240786
	465.948	0.90437	0.947582	0.948232	0.963344	1.00476	0.993759	0.960342	0.0330183	0.0134797
	466.573	0.913219	0.985693	0.948342	0.880782	0.991721	0.961429	0.946864	0.0392279	0.0160147
	467.199	0.919667	0.969373	0.924095	0.96891	1.03073	0.897885	0.951777	0.0438535	0.0179031
	467.824	0.972798	1.02863	0.865626	0.924045	0.95894	0.959279	0.951552	0.0494063	0.02017
	468.449	0.930422	0.953887	0.887173	0.930665	1.02776	1.01778	0.957948	0.0499691	0.0203998
[truncated: 1,319 more rows]

## Sheet: Figure 2B
Figure 2B	Hv1-Q191Anap
Emission peak normalized to fluorescence at pHo=7	Cell	pHo=3	pHo=4	pHo=5	pHo=6	pHo=7	pHo=8	pHo=9
Note:	exp_1	0.380499	0.206834	0.116385	0.0108098	0	-0.0156747	0.176966
pHo= external pH	exp_2	-0.344489	-0.222344	-0.137192	-0.138564	0	0.163597	0.173659
SD: Standard deviation	exp_3	0.35609	0.240682	0.113366	0.0652206	0	0.0702415	-0.00241082
S.E.M.: Standard error	exp_4	-0.298743	-0.240527	-0.22144	-0.0880632	0	0.04168	-0.0389509
	exp_5	0.0983635	-0.0112422	-0.00186823	0.0136102	0	0.146458	0.156203
	exp_6	-0.284585	-0.170962	-0.14325	-0.0554442	0	0.105253	0.140007
	exp_7	-0.103402	-0.158001	-0.00378618	-0.0433126	0	-0.0108593	-0.105865
	exp_8	0.141661	0.182297	0.110262	0.00101884	0	-0.268351	-0.289034
	exp_9	0.178459	0.205814	0.142035	0.107258	0	-0.193352	-0.10836
	exp_10	-0.322616	0.414483	0.3983	0.331057	0	-0.0967166	-0.240125
	exp_11	-0.130182	-0.169476	-0.18366	-0.0678714	0	0.109838	0.499417
	exp_12	0.158004	0.00435232	0.0356844	0.182924	0	0.0992419	-0.0154499
	exp_13	0.0297251	0.0655278	0.0456099	0.00806564	0	-0.00595794	-0.114752
	Average	-0.0108627	0.0267261	0.0208036	0.0251314	0	0.0111844	0.0177927
	S.D.	0.244653	0.202571	0.16106	0.120092	0	0.125698	0.201887
	S.E.M.	0.0678545	0.056183	0.0446701	0.0333075	0	0.0348624	0.0559933

## Sheet: Figure 2D
Figure 2D			ΔpH=1
F-V and G-V curves Hv1-V62Anap		Hv1-V62Anap	Conductance						Fluorescecne
Note:		Membrane potential (mV)	GNorm_exp_1	GNorm_exp_2	GNorm_exp_3	Average	S.D.	S.E.M.	F_exp_1	F_exp_2	F_exp_3	Average	S.D.	S.E.M.
GNorm: Normalized Conductance		-100	0.00463508	0.00122726	0.000231918	0.00203142	0.00188538	0.00108852	-0.00900233	-0.000138361	-0.0105218	-0.00655416	0.00457887	0.00264361
F: %ΔF/F0		-80	-0.0119194	-0.00274274	-0.000248962	-0.00497038	0.00501808	0.00289719	0.00171661	0.000274964	0.000390074	0.000793882	0.000654156	0.000377677
SD: Standard deviation		-60	-0.0845642	-0.0431213	-0.0214997	-0.0497284	0.0261664	0.0151072	-0.00337532	-0.000368378	0.000454237	-0.00109649	0.001646	0.00095032
S.E.M.: Standard error		-40	-0.00679501	-0.00225159	-0.000718161	-0.00325492	0.00258031	0.00148974	0.00682242	-0.000612246	-0.000691744	0.00183948	0.00352362	0.00203436
		-20	0.00559768	0.00448726	0.0147507	0.00827856	0.00459892	0.00265519	0.00826882	0.00122551	0.00175321	0.00374918	0.00320312	0.00184932
		0	0.23088	0.0723067	0.168966	0.157384	0.0652533	0.037674	0.00631914	0.000875983	0.000311179	0.0025021	0.00270889	0.00156398
		20	0.560204	0.418644	0.419591	0.466146	0.06651	0.0383996	0.00797698	0.00155763	0.00494625	0.00482695	0.00262205	0.00151384
		40	0.761731	0.721579	0.612534	0.698615	0.0630367	0.0363943	0.00403341	0.000393373	0.00358203	0.0026696	0.00162005	0.000935338
		60	0.880214	0.885047	0.753959	0.83974	0.0606886	0.0350386	0.00648201	0.00032114	0.00156222	0.00278845	0.00266043	0.001536
		80	0.957317	0.962807	0.861133	0.927086	0.0466893	0.0269561	0.00899043	0.000939026	0.00211588	0.00401511	0.00355074	0.00205002
		100	1	0.997035	0.942431	0.979822	0.0264673	0.0152809	0.00481251	0.00176926	0.000739975	0.00244058	0.00172904	0.000998264
		120	0.980293	1	1	0.993431	0.0092902	0.0053637	0.0100068		0.00384254	0.00692469	0.00308215	0.00217941
