# Supplementary material for: Activation-pathway transitions in human voltage-gated proton channels revealed by a non-canonical fluorescent amino acid
Source: eLife. 2023 Jan 25;12:e85836. doi: 10.7554/eLife.85836 (PMC9925047; doi:10.7554/eLife.85836)
Supplement: Figure 3—source data 1. [file elife-85836-fig3-data1.xlsx]

## Sheet: Figure 3C
Figure 3C
Activation time constants at ΔpH=0 (7-7)		Hv1-A197Anap	Current						Fluorescence
Note:		Membrane potential (mV)	Tau_exp_1	Tau_exp_2	Tau_exp_3	Average	S.D.	S.E.M.	Tau_exp_1	Tau_exp_2	Tau_exp_3	Average	S.D.	S.E.M.
Taus in ms		60	728.385	689.75	383.098	600.411	189.188	109.228	598.48	949.307	1131.38	893.054	270.865	156.384
SD: Standard deviation		80	570.321	637.389	363.055	523.588	143.013	82.5685	509.424	800.448	1139.51	816.461	315.348	182.066
S.E.M.: Standard error		100	492.708	523.834	381.185	465.909	75.0058	43.3046	773.934	969.744	1276.36	1006.68	253.24	146.208
		120	409.433	564.94	380.214	451.529	99.2974	57.3294	669.837	885.583	1123.2	892.875	226.771	130.927
		140	355.897	522.139	378.86	418.965	90.0855	52.0109	727.484	732.386	795.482	751.784	37.9225	21.8946
											#REF!	#REF!	#REF!	#REF!	#REF!
											#REF!	#REF!	#REF!	#REF!	#REF!
											#REF!	#REF!	#REF!	#REF!	#REF!

## Sheet: Figure 3D
Figure 3D		Hv1-A197Anap
F-V and G-V curves Hv1-A197Anap mutant		ΔpH=0	Normalized Conductance							Normalized Fluorescence Changes
Note:		Membrane potential (mV)	GNorm_exp_1	GNorm_exp_2	GNorm_exp_3	GNorm_exp_4	Average	S.D.	S.E.M.	FNorm_exp_1	FNorm_exp_2	FNorm_exp_3	FNorm_exp_4	Average	S.D.	S.E.M.
ΔpH=0 (7-7)		-40	-0.00271058	-0.000994181	-0.000152186	9.41376e-05	-0.000940702	0.00109863	0.000549316	0.192269	-0.0567106	-0.0188441	0.00231245	0.0297567	0.0961797	0.0480899
ΔpH=1 (7-6)		-20	0.0108393	0.0039726	0.000607711	-0.000374537	0.00376127	0.00439298	0.00219649	0.0750589	0.0691952	-0.0362459	-0.0163252	0.0229207	0.049751	0.0248755
ΔpH=2 (7-5)		0								-0.027662	-0.00680243	-0.134555	0.251783	0.0206909	0.14195	0.0709748
Gnorm:Normalized Conductance		20	0.278663	0.0973384	0.00259424	7.13828e-05	0.0946666	0.113233	0.0566167	0.0962196	0.139139	0.0705755	0.16843	0.118591	0.0377894	0.0188947
FNorm: Normalized %ΔF/F0		40	0.637093	0.329038	0.0132463	0.0214917	0.250217	0.257078	0.128539	0.377599	0.154123	0.0824143	0.192602	0.201685	0.108991	0.0544954
SD: Standard deviation		60	0.821388	0.614509	0.100189	0.169221	0.426327	0.301644	0.150822	0.636505	0.458584	0.127989	0.272267	0.373836	0.19166	0.09583
S.E.M.: Standard error		80	0.913587	0.815387	0.335449	0.465973	0.632599	0.238971	0.119485	0.888351	0.88594	0.342011	0.448195	0.641124	0.248871	0.124435
		100	0.968056	0.934951	0.60541	0.726814	0.808808	0.14947	0.0747352	0.994798	0.713716	0.467156	0.691093	0.716691	0.187267	0.0936334
		120	0.999999	0.985554	0.838097		0.941217	0.0731547	0.0422359	1	0.737519	0.794038	0.62384	0.788849	0.13645	0.068225
		140		1	1	1	1	3.77124e-07	2.17732e-07		0.999999	1	0.999999	0.999999	9.79796e-08	5.65685e-08
		Hv1-A197Anap
		ΔpH=1	Normalized Conductance														Normalized Fluorescence changes
		Membrane potential (mV)	GNorm_exp_1	GNorm_exp_2	GNorm_exp_3	GNorm_exp_4	GNorm_exp_5	GNorm_exp_6	GNorm_exp_7	GNorm_exp_8	GNorm_exp_9	GNorm_exp_10	GNorm_exp_11	Average	S.D.	S.E.M.	FNorm_exp_1	FNorm_exp_2	FNorm_exp_3	FNorm_exp_4	FNorm_exp_5	FNorm_exp_6	FNorm_exp_7	FNorm_exp_8	FNorm_exp_9	FNorm_exp_10	FNorm_exp_11	Average	S.D.	S.E.M.
		-100	0.000309232	0.00083402	0.000213701	0.000925666	0.0014577	0.000111879	0.00143136	0.00100512	0.00029416	0.000932871	-0.00422214	0.000299416	0.0014981	0.000451694	0.0253637	-0.0070062	0.0142647	-0.0248385	-0.168937	0.0140441	-0.203438	-0.0225161	-0.11097	0.0187042	0.071458	-0.0358065	0.0830176	0.0250308
		-80	-0.000695817	-0.00338862	-0.000892721	-0.00372041	-0.00463668	0.000374477	-0.00300197	-0.00186516	-0.000913659	0.00116929	0.00822486	-0.000849674	0.00333908	0.00100677	0.0197625	0.0158398	0.00706435	-0.0134126	-0.0237302	0.00419282	-0.0218252	0.000282837	-0.0806175	-0.0159535	0.0371575	-0.00647628	0.0295441	0.00890788
		-60	-0.0104978	0.0467358	0.0131931	0.0496282	0.0175209	-0.0348339	-0.0598289	-0.0539217	0.00259506	-0.192134	0.207063	-0.00131634	0.0918087	0.0276814	-0.000706372	-0.0321186	-0.0181195	0.130852	0.0789859	0.0820184	0.170685	-0.0200877	-0.0535923	0.114442	0.022713	0.0431883	0.071955	0.0216952
		-40	-0.000559661	0.000134653	6.13051e-05	0.000101367	-0.00117134	-0.000883331	-0.00283657	-0.00225409	-0.000257576	-0.00521028	0.00904175	-0.000348525	0.00334739	0.00100928	0.0202035	0.00478434	-0.0315691	0.109448	-0.131089	0.0973896	0.0115013	0.0450655	-0.0037766	0.0785124	0.102023	0.0274993	0.0677614	0.0204308
		-20	0.0018841	0.0178993	0.0451203	0.0679886	0.0201848	0.0188674	-0.00279394	0.00667561	0.0238139	0.0208987	0.0367296	0.023388	0.0193859	0.00584506	0.0546015	0.0220093	0.0483729	0.130837	-0.0205617	0.121768	0.0595664	-0.00315474	-0.00220798	-0.00800071	0.138325	0.0492322	0.0558187	0.01683
		0	0.0460967	0.146109	0.365997	0.398762	0.240279	0.158367	0.0587816	0.0860059	0.170967	0.238497	0.14915	0.187183	0.109979	0.0331599	0.0479801	0.242703	0.254711	0.221048	0.17381	0.246049	0.212678	0.0462316	0.204316	0.242786	0.118212	0.182775	0.0740127	0.0223157
		20	0.278086	0.386989	0.710556	0.657116	0.637795	0.393526	0.370792	0.316333	0.416675	0.56986	0.463092	0.472802	0.140401	0.0423325	0.314221	0.451045	0.5515	0.575214	0.43159	0.554352	0.32341	0.142756	0.208902	0.394675	0.264361	0.382911	0.138895	0.0418785
		40	0.566479	0.582237	0.893741	0.794693	0.854815	0.589442	0.695718	0.525945	0.620099	0.801198	0.765025	0.699036	0.122677	0.0369885	0.623861	0.694836	0.758197	0.637099	0.649701	0.812986	0.484601	0.215626	0.473808	0.729312	0.485622	0.596877	0.162503	0.0489966
		60	0.770405	0.733586	0.973512	0.868166	0.961576	0.747602	0.886074	0.678003	0.767105	0.93243	0.929951	0.840765	0.0992755	0.0299327	0.827308	0.836667	0.826708	0.811477	0.789394	0.936582	0.696834	0.435516		0.876263	0.779769	0.781652	0.129635	0.0409942
		80	0.897863	0.849783	1	0.905396	0.997915	0.863658	0.980424	0.804148	0.898536	1	1	0.927066	0.068133	0.0205429	0.947896	0.874273	1	0.926403	0.966031	0.996517	0.843109	0.483828	0.64124	0.999996	0.864247	0.867595	0.1568	0.0472768
		100	0.969842	0.931262	0.992834	0.938114	1	0.94631	1	0.8996	0.964542	0.996306	0.998452	0.967024	0.0327387	0.0098711	0.951279	0.856383	0.941953	0.985909	0.989238	1.00109	0.871408	0.650597	0.867479	0.953158	0.965938	0.912221	0.0960408	0.0289574
		120	1	0.978374		0.971649	0.978808	0.982995	0.98314	0.961542	1	0.952328	0.983534	0.979237	0.0141629	0.00447869	0.999999	0.829915		1	0.935327	0.994249	1	0.827181	1	0.899307	0.999999	0.948598	0.0683579	0.0216167
		140	0.995289	1		1	0.980415	1	0.945977	1	0.987668		0.97053	0.986654	0.0174538	0.00581792	0.996581	0.999996			1	1	0.927582	0.999999			0.919255	0.977631	0.0343784	0.0129938
		Hv1-A197Anap
		ΔpH=2	Normalized Conductance									Normalized Fluorescence
		Membrane potential (mV)	GNorm_exp_1	GNorm_exp_2	GNorm_exp_3	GNorm_exp_4	GNorm_exp_5	GNorm_exp_6	Average	S.D.	S.E.M.	FNorm_exp_1	FNorm_exp_2	FNorm_exp_3	FNorm_exp_4	FNorm_exp_5	FNorm_exp_6	Average	S.D.	S.E.M.
		-100	-0.45498	-0.026701	-5.77583e-07	3.18252e-06	0.000126155	-0.0172776	-0.0831384	0.166607	0.0680169	0.0179146	0.0239079	-0.015575	-0.0836186	-0.0576876	-0.0285484	-0.0239345	0.0383685	0.0156639
		-80	-0.00517089	0.0255919	3.6399e-07	1.20791e-06	-0.000130573	0.0165237	0.00613596	0.0110215	0.00449949	-0.0502485	0.109368	0.17403	0.0164643	0.127142	-0.0567645	0.0533317	0.0888493	0.0362726
		-60	0.0499253	-0.00839281	0.146374	0.0578499	4.04462e-05	-0.0054274	0.0400616	0.0543672	0.0221953	-0.0466049	0.105511	0.223365	0.310507	-0.143639	0.0319259	0.0801774	0.154214	0.0629576
		-40	0.129325	0.147724	0.361992	0.257809	0.0344095	0.0699636	0.16687	0.111845	0.0456604	0.0242604	0.0841137	0.440144	0.396339	0.130323	0.250675	0.220976	0.155625	0.0635337
		-20	0.367028	0.364912	0.575062	0.430833	0.257279	0.284923	0.380006	0.104187	0.042534	0.173603	0.4717	0.578955	0.405991	0.228291	0.127101	0.33094	0.165227	0.0674537
		0	0.604224	0.560538	0.811725	0.535002	0.568569	0.495889	0.595991	0.101946	0.0416193	0.427289	0.661761	0.810193	0.558979	0.435797	0.503298	0.566219	0.134768	0.0550187
		20	0.814909	0.769719	1	0.662836	0.761993	0.639037	0.774749	0.117956	0.0481552	0.75854	0.822643	1	0.681674	0.621027	0.519199	0.733847	0.153219	0.0625514
		40	1	0.928944		0.829613	0.860878	0.733809	0.870649	0.0901495	0.0403161	1	1		0.7639	0.820258	0.850241	0.88688	0.0964338	0.0431265
		60		1		1	0.924331	0.859887	0.946055	0.0585596	0.0292798		0.980214		1	0.844082	0.959163	0.945865	0.0605126	0.0302563
		80					0.976593	1	0.988296	0.0117037	0.00827577					1	1	1	0	0
		100					1		1	0	0					0.993827		0.993827	0	0
