# Supplementary material for: Activation-pathway transitions in human voltage-gated proton channels revealed by a non-canonical fluorescent amino acid
Source: eLife. 2023 Jan 25;12:e85836. doi: 10.7554/eLife.85836 (PMC9925047; doi:10.7554/eLife.85836)
Supplement: Figure 4—source data 1. [file elife-85836-fig4-data1.xlsx]

## Sheet: Figure 4B
Figure 4B
Fluorescent spectra of Anap normalized to mCherry fluorescence		Hv1-A197Anap	Anap fluorescence																																													Hv1-A197Anap	mCherry fluorescence
Note:		Wavelenght (nm)	Cell_1	Cell_2	Cell_3	Cell_4	Cell_5	Cell_6	Cell_7	Cell_8	Cell_9	Cell_10	Cell_11	Cell_12	Cell_13	Cell_14	Cell_15	Cell_16	Cell_17	Cell_18	Cell_19	Cell_20	Cell_21	Cell_22	Cell_23	Cell_24	Cell_25	Cell_26	Cell_27	Cell_28	Cell_29	Cell_30	Cell_31	Cell_32	Cell_33	Cell_34	Cell_35	Cell_36	Cell_37	Cell_38	Cell_39	Cell_40	Cell_41	Average	S.D.	S.E.M.		Wavelenght (nm)	Cell_1
Experiments taken after 48h transfection		428.6	0.00395477	0.00166264	0.00291832	0.0123778	-0.000428087	0.00062486	0.00139848	-0.00878634	-0.00205539	-0.00213537	0.00256707	-0.000264826	-0.000883351	0.00287183	0.0069042	0.00936762	-0.00140993	0.000219606	-0.00152477	-0.000920206	-0.00157842	0.00239605	0.00825801	-0.00266737	0.00127944	0.0010277	-0.000602117	-0.000660538	0.00155102	-0.00230162	-0.00267266	-0.000773984	0.00127533	0.00409068	0.00160356	0.00187767	-0.00105765	0.00259118	0.00102242	0.0072437	0.00143727	0.0012146	0.00367863	0.000574506		428.6	-0.000649549
S.D.: Standard deviation		428.991	0.0431131	0.0494127	0.0524176	0.0880569	0.0552511	0.0599877	0.0687725	0.206064	0.105432	0.124403	0.0940114	0.102436	0.0702508	0.0735176	0.114831	0.105511	0.127162	0.0645757	0.0853025	0.0859498	0.0472167	0.123821	0.043	0.0651562	0.133969	0.0521132	0.0616448	0.122451	0.0830965	0.0569037	0.164925	0.0305642	0.116839	0.061015	0.0980067	0.0590798	0.0696977	0.116156	0.096684	0.0508652	0.0679331	0.0853072	0.0358254	0.00559498		428.991	-0.000986098
S.E.M.: Standard error		429.382	0.0495328	0.0936926	0.0717976	0.083862	0.082448	0.109981	0.0829015	0.19539	0.116239	0.119612	0.110789	0.113886	0.0727039	0.0933775	0.137602	0.127353	0.147734	0.0812606	0.106905	0.109267	0.0569002	0.18525	0.0575142	0.0599739	0.181678	0.0597019	0.0746543	0.139843	0.132	0.0771636	0.193368	0.0396337	0.109523	0.0744523	0.118852	0.0772114	0.0730023	0.130697	0.0946514	0.0696204	0.0868737	0.102412	0.0386519	0.00603641		429.382	0.00319912
		429.773	0.0560029	0.104246	0.0634036	0.0879059	0.0822346	0.117262	0.08046	0.204919	0.131389	0.128585	0.0890824	0.106628	0.0727209	0.101461	0.129986	0.117346	0.153729	0.0787499	0.10497	0.0858043	0.0605118	0.202214	0.0585243	0.079593	0.178174	0.0599742	0.0749155	0.165652	0.117712	0.0919408	0.195494	0.0387323	0.129969	0.0671308	0.120443	0.0730596	0.083874	0.140159	0.104724	0.0905213	0.0848527	0.105245	0.0404775	0.00632152		429.773	0.00190495
		430.164	0.0511868	0.0931682	0.0609832	0.123046	0.0872146	0.105348	0.0769294	0.2483	0.116558	0.119898	0.104876	0.11464	0.0840639	0.116301	0.134594	0.0887226	0.1645	0.0798331	0.103448	0.118101	0.0729533	0.17255	0.0585036	0.0852236	0.18125	0.0602012	0.087239	0.162178	0.121527	0.073839	0.182342	0.0358897	0.134132	0.0668346	0.1048	0.080077	0.0798079	0.142422	0.109095	0.121163	0.0956085	0.107789	0.04132	0.0064531		430.164	-0.00424944
		430.555	0.0582544	0.0970485	0.064686	0.111783	0.0926188	0.113678	0.0860564	0.24979	0.128046	0.128939	0.1129	0.124227	0.0838438	0.106807	0.151072	0.147891	0.150701	0.0896698	0.126092	0.10582	0.0517787	0.208363	0.0464402	0.0939878	0.198648	0.067167	0.0883204	0.161985	0.14297	0.0747637	0.175735	0.0400459	0.115658	0.0768494	0.117751	0.0876659	0.0920203	0.132502	0.111144	0.064507	0.0913743	0.111454	0.0438989	0.00685585		430.555	0.0034774
		430.946	0.0511134	0.0996117	0.075402	0.11607	0.0960716	0.117178	0.0946393	0.242913	0.108429	0.14504	0.114832	0.124924	0.0812722	0.112646	0.137037	0.123225	0.151397	0.0897635	0.103017	0.111974	0.0739884	0.202421	0.0575128	0.0929633	0.202945	0.0734225	0.0885157	0.177499	0.112676	0.10203	0.229471	0.0495006	0.138453	0.0878842	0.122102	0.0810648	0.0935481	0.146461	0.131045	0.0626243	0.0958914	0.115087	0.0441552	0.00689589		430.946	0.00290607
		431.338	0.0622603	0.118283	0.0762628	0.109764	0.110904	0.104598	0.0972866	0.25735	0.121014	0.141291	0.1123	0.120336	0.0896696	0.0871834	0.165836	0.177821	0.167811	0.118507	0.124869	0.124032	0.0694234	0.237266	0.0557485	0.0763371	0.19056	0.0665882	0.0894567	0.176125	0.14089	0.0692918	0.206486	0.0427286	0.141293	0.0851472	0.131775	0.0872031	0.0838579	0.16016	0.122852	0.061492	0.101979	0.119123	0.0482829	0.00754053		431.338	0.0037642
		431.729	0.0490712	0.102032	0.0857273	0.116905	0.0890411	0.128686	0.0973752	0.244369	0.121558	0.140366	0.131251	0.13221	0.0846054	0.127151	0.178064	0.152731	0.177047	0.0931342	0.120899	0.124514	0.08048	0.221347	0.071098	0.108265	0.210485	0.0644021	0.0958967	0.167119	0.165141	0.0958582	0.210205	0.0428707	0.133695	0.0727094	0.141496	0.0930373	0.0914364	0.159618	0.122174	0.0761289	0.100687	0.122461	0.0461147	0.00720191		431.729	-0.0015216
		432.12	0.0619507	0.116228	0.0636043	0.138167	0.0809299	0.107557	0.0999952	0.245392	0.134297	0.150103	0.136052	0.140645	0.0828731	0.116569	0.166367	0.164179	0.181506	0.116806	0.125565	0.119463	0.0931066	0.20868	0.064739	0.0895952	0.220226	0.0797741	0.101505	0.181648	0.121106	0.075793	0.245535	0.0465861	0.146665	0.092547	0.141441	0.0785229	0.09801	0.168388	0.129237	0.0936487	0.106189	0.125151	0.0477897	0.00746349		432.12	0.00267044
		432.511	0.0702545	0.10357	0.0963608	0.131845	0.112015	0.120198	0.103001	0.271316	0.149878	0.137719	0.125557	0.150492	0.0924977	0.138607	0.192485	0.172205	0.158566	0.111357	0.122643	0.113945	0.0849712	0.243257	0.0717068	0.0771273	0.220319	0.074123	0.103547	0.183487	0.149404	0.111281	0.241832	0.0443438	0.15553	0.0876824	0.144918	0.0924326	0.0808378	0.16657	0.122601	0.0813912	0.105521	0.129693	0.0502094	0.00784139		432.511	0.00149415
		432.902	0.0793226	0.120131	0.0797211	0.137423	0.107306	0.118645	0.104771	0.270504	0.147217	0.155891	0.140109	0.156164	0.100553	0.131164	0.159149	0.142122	0.229382	0.105761	0.136171	0.116398	0.0872642	0.252893	0.0630046	0.0989594	0.225155	0.073038	0.105617	0.175377	0.145564	0.0949563	0.234169	0.0489335	0.140274	0.0962604	0.133836	0.103544	0.100772	0.176823	0.140995	0.0892954	0.110328	0.13256	0.050293	0.00785444		432.902	0.00110946
		433.293	0.0676083	0.118125	0.0962158	0.148848	0.114228	0.108066	0.111745	0.237248	0.141997	0.149567	0.117232	0.141499	0.0893447	0.13728	0.178696	0.166297	0.163702	0.148143	0.135408	0.141452	0.0684359	0.250158	0.0704223	0.107459	0.238431	0.0720868	0.097642	0.1906	0.147041	0.111197	0.252971	0.0465885	0.155005	0.0928063	0.14071	0.0927749	0.0992629	0.191015	0.13322	0.116017	0.110565	0.134076	0.0491033	0.00766865		433.293	-0.00227074
		433.684	0.0816012	0.0943145	0.0880511	0.145307	0.113901	0.130529	0.122651	0.285064	0.152078	0.147424	0.133241	0.139389	0.103571	0.125898	0.203296	0.186794	0.20346	0.136097	0.135343	0.134395	0.0915772	0.227486	0.0754017	0.107019	0.200504	0.0824692	0.102847	0.201773	0.144049	0.100256	0.261583	0.0502053	0.150944	0.0937987	0.145487	0.0900893	0.105552	0.168893	0.14335	0.102544	0.128794	0.137489	0.0499634	0.00780297		433.684	0.00665529
		434.075	0.0765394	0.0843571	0.0942024	0.165503	0.115451	0.118549	0.118437	0.320894	0.148302	0.159849	0.136949	0.161044	0.110959	0.125612	0.180281	0.201296	0.1974	0.0959597	0.139953	0.140288	0.0995358	0.242035	0.0671115	0.121008	0.223731	0.0737896	0.106717	0.181055	0.147227	0.11408	0.290745	0.0533849	0.179069	0.0903892	0.16009	0.114937	0.103041	0.198708	0.139983	0.108893	0.131712	0.142416	0.0563505	0.00880048		434.075	0.00509266
		434.466	0.0678704	0.122352	0.109036	0.149642	0.119696	0.136929	0.129847	0.3143	0.171749	0.166813	0.148432	0.169999	0.104457	0.14506	0.228709	0.197698	0.189804	0.113945	0.136804	0.139043	0.0947997	0.237211	0.0692577	0.11412	0.24698	0.088407	0.110508	0.213181	0.145586	0.120486	0.273994	0.0583524	0.180557	0.0936205	0.169028	0.113625	0.118776	0.18463	0.137402	0.118174	0.133686	0.148404	0.0549418	0.00858046		434.466	0.00082383
		434.857	0.0867187	0.115407	0.0988618	0.151282	0.123734	0.142467	0.124727	0.258606	0.158706	0.160071	0.157072	0.165927	0.103074	0.147654	0.182519	0.148881	0.191477	0.101426	0.149102	0.152062	0.104021	0.265521	0.0773614	0.112712	0.261671	0.0781326	0.110929	0.189171	0.163715	0.118232	0.285578	0.046306	0.166145	0.107951	0.163008	0.100336	0.107695	0.181437	0.148263	0.113383	0.13113	0.145182	0.0518381	0.00809575		434.857	-0.00651478
		435.248	0.0865116	0.140193	0.110924	0.152141	0.130484	0.165466	0.120827	0.347517	0.157792	0.173696	0.160657	0.163514	0.119713	0.147199	0.17466	0.185024	0.21025	0.133386	0.162424	0.140664	0.0869796	0.287893	0.0828615	0.09334	0.2631	0.0897135	0.10868	0.203679	0.138662	0.115833	0.264901	0.0590041	0.170943	0.0962876	0.156533	0.118892	0.112157	0.179511	0.152019	0.0916737	0.135701	0.15101	0.058157	0.0090826		435.248	0.000679618
		435.639	0.0817901	0.145635	0.105397	0.155359	0.117335	0.152471	0.136293	0.319482	0.192401	0.160243	0.156649	0.187059	0.119982	0.147445	0.150937	0.16378	0.219383	0.120499	0.153404	0.152769	0.101455	0.270061	0.0683861	0.119523	0.253572	0.0858643	0.120079	0.219467	0.159074	0.117098	0.255575	0.0534744	0.166669	0.107647	0.170257	0.118903	0.11498	0.191341	0.163866	0.122862	0.133581	0.152489	0.0542525	0.00847281		435.639	-0.00204229
		436.031	0.0769868	0.129848	0.113246	0.182368	0.123891	0.145805	0.134016	0.283436	0.175293	0.169264	0.172315	0.182248	0.125477	0.154118	0.201752	0.177989	0.228787	0.150333	0.157547	0.154761	0.0987861	0.277605	0.0826145	0.129253	0.273917	0.092276	0.116806	0.221665	0.184532	0.124692	0.308704	0.0534742	0.175371	0.107616	0.188945	0.125261	0.109573	0.200994	0.156318	0.129202	0.142996	0.159514	0.0564314	0.0088131		436.031	-0.00163748
		436.422	0.0844546	0.148323	0.111161	0.179828	0.135627	0.155418	0.135794	0.33864	0.162227	0.187162	0.167023	0.187697	0.112767	0.184215	0.204085	0.23795	0.204853	0.136405	0.159318	0.141755	0.123654	0.285311	0.0871515	0.120132	0.274797	0.0981168	0.124366	0.22164	0.177819	0.134025	0.277662	0.0593754	0.156723	0.117707	0.172467	0.126301	0.124984	0.21477	0.164331	0.113186	0.139005	0.163128	0.0579232	0.00904609		436.422	-0.00629756
		436.813	0.0774883	0.142261	0.112314	0.211531	0.135207	0.152533	0.146444	0.315856	0.186259	0.185339	0.16636	0.202041	0.127955	0.154751	0.208874	0.229685	0.220262	0.136587	0.160394	0.153245	0.0933779	0.304567	0.0761813	0.130596	0.283319	0.0984048	0.125378	0.222788	0.168427	0.140007	0.270387	0.0686969	0.173226	0.111881	0.172792	0.132815	0.131101	0.188879	0.152858	0.128055	0.146525	0.164528	0.0577419	0.00901777		436.813	0.00439975
		437.204	0.0671043	0.138252	0.119283	0.185168	0.146965	0.158781	0.144678	0.33844	0.188577	0.203973	0.17437	0.192478	0.12034	0.164391	0.222164	0.275775	0.232407	0.158568	0.189166	0.155635	0.112088	0.289129	0.0843671	0.141051	0.278915	0.107326	0.129732	0.222553	0.157068	0.115105	0.338672	0.0629027	0.182897	0.123722	0.172996	0.143612	0.12505	0.239321	0.15654	0.125672	0.149402	0.171576	0.0640876	0.0100088		437.204	-0.00319938
		437.595	0.0870794	0.159837	0.112287	0.188075	0.141085	0.172378	0.150723	0.324864	0.190109	0.207631	0.167555	0.212517	0.123616	0.164129	0.220146	0.231576	0.235692	0.194149	0.1841	0.160845	0.102256	0.303214	0.0667955	0.136022	0.291079	0.100824	0.135194	0.238451	0.171097	0.164609	0.277983	0.0621118	0.194959	0.11534	0.200744	0.14034	0.121987	0.223999	0.169797	0.136654	0.145163	0.17383	0.0600281	0.00937482		437.595	0.00271807
		437.986	0.0718797	0.147664	0.11378	0.187209	0.150892	0.172168	0.147664	0.372245	0.206248	0.209345	0.190528	0.216128	0.127405	0.177633	0.23415	0.207678	0.239726	0.146071	0.177468	0.175352	0.12459	0.289121	0.0891917	0.14328	0.293282	0.106419	0.131781	0.243159	0.188368	0.137997	0.315694	0.059943	0.193853	0.112213	0.214077	0.137821	0.119544	0.221444	0.170641	0.123122	0.159321	0.176734	0.0644819	0.0100704		437.986	-0.00674691
		438.377	0.0853605	0.165395	0.117485	0.197853	0.154953	0.172447	0.155787	0.308964	0.190941	0.221269	0.173695	0.219265	0.134177	0.174933	0.251972	0.25169	0.251389	0.180737	0.169506	0.172026	0.118683	0.306989	0.0831353	0.127179	0.310443	0.103385	0.137691	0.241716	0.185637	0.147309	0.368377	0.062725	0.21333	0.115668	0.189145	0.130032	0.135558	0.243968	0.185497	0.116228	0.156411	0.181194	0.0665882	0.0103993		438.377	0.00428481
		438.768	0.0798503	0.16752	0.12848	0.196011	0.152946	0.157931	0.171395	0.381147	0.194614	0.197478	0.194518	0.208579	0.133059	0.180093	0.230443	0.22247	0.235385	0.16198	0.159228	0.16603	0.123666	0.290439	0.0903573	0.140492	0.304901	0.105693	0.128307	0.23245	0.192826	0.14096	0.342516	0.075917	0.188264	0.126099	0.190477	0.131346	0.146037	0.236963	0.171289	0.148962	0.165063	0.180297	0.0641111	0.0100125		438.768	-0.00373214
		439.159	0.0827723	0.166686	0.138611	0.193167	0.151891	0.151608	0.167663	0.351149	0.199395	0.222396	0.199098	0.214673	0.138086	0.203328	0.246021	0.210941	0.253101	0.183373	0.179023	0.21551	0.132832	0.293551	0.0895923	0.149418	0.311707	0.109621	0.134528	0.25068	0.191061	0.139446	0.317867	0.0735427	0.171057	0.13103	0.210576	0.135586	0.139026	0.23572	0.170541	0.154345	0.155672	0.184534	0.0618606	0.00966101		439.159	-0.00964816
		439.55	0.0877821	0.143465	0.135177	0.181347	0.174049	0.178929	0.155613	0.344869	0.200389	0.207685	0.184425	0.236971	0.135989	0.183696	0.214048	0.264961	0.252276	0.170699	0.194169	0.178785	0.111798	0.324114	0.092854	0.144101	0.315297	0.108261	0.139161	0.246121	0.214781	0.161279	0.394089	0.0783903	0.202329	0.137143	0.223276	0.156134	0.132949	0.267331	0.177745	0.125177	0.166808	0.188889	0.069146	0.0107988		439.55	-0.000896641
		439.941	0.076512	0.144706	0.138784	0.20587	0.149047	0.182238	0.171028	0.426137	0.211091	0.211119	0.199734	0.244421	0.140482	0.183008	0.205173	0.259436	0.250949	0.179949	0.184357	0.1873	0.127585	0.28373	0.0945094	0.140153	0.337913	0.109041	0.158563	0.247411	0.194199	0.136697	0.379836	0.0715865	0.219764	0.131121	0.205537	0.141475	0.149468	0.260625	0.185274	0.133249	0.166918	0.190878	0.072962	0.0113948		439.941	-0.00243212
		440.332	0.0913915	0.1769	0.143945	0.220721	0.168095	0.179372	0.184352	0.412143	0.206833	0.227338	0.218511	0.223567	0.139011	0.210497	0.266072	0.2077	0.251251	0.200188	0.175779	0.193959	0.120426	0.304093	0.122778	0.149656	0.330898	0.103537	0.157078	0.268638	0.209406	0.155321	0.37749	0.0743782	0.202468	0.143423	0.214646	0.134705	0.157731	0.243817	0.186993	0.135434	0.179134	0.196821	0.0697674	0.0108958		440.332	-0.00113692
		440.723	0.0956618	0.130827	0.145589	0.213	0.168818	0.174794	0.177975	0.36142	0.201719	0.223193	0.19621	0.246339	0.150275	0.207866	0.234527	0.272462	0.273351	0.181827	0.19349	0.192954	0.129447	0.324984	0.0925217	0.157127	0.34244	0.112384	0.150392	0.264563	0.206778	0.131388	0.368698	0.0819022	0.213887	0.142459	0.221385	0.152716	0.156114	0.261326	0.197127	0.150187	0.171052	0.196858	0.0689613	0.0107699		440.723	0.0015219
		441.115	0.0970567	0.142119	0.137631	0.216556	0.17867	0.18073	0.219045	0.416343	0.212468	0.236642	0.205042	0.236832	0.134939	0.193867	0.263571	0.232245	0.258932	0.199021	0.202649	0.199404	0.135903	0.34837	0.109716	0.148865	0.340578	0.119298	0.166706	0.264741	0.191923	0.157689	0.361742	0.0802575	0.237878	0.14818	0.228348	0.156775	0.164825	0.283243	0.189715	0.135857	0.171892	0.202592	0.0719634	0.0112388		441.115	0.00106747
		441.506	0.089886	0.140557	0.13615	0.248735	0.193367	0.191738	0.186929	0.447712	0.207391	0.204485	0.228452	0.247085	0.140453	0.201815	0.238591	0.229549	0.266784	0.175907	0.198407	0.207641	0.125589	0.342567	0.107143	0.147303	0.346873	0.114888	0.145857	0.266311	0.19903	0.190295	0.366231	0.0847717	0.228166	0.137624	0.226145	0.156311	0.166677	0.267296	0.209931	0.145007	0.181654	0.203349	0.074604	0.0116512		441.506	-0.00364295
		441.897	0.101054	0.182243	0.157376	0.253767	0.176944	0.195988	0.200525	0.376904	0.222741	0.251527	0.227037	0.249003	0.156875	0.226664	0.2762	0.244274	0.280004	0.203929	0.212215	0.18891	0.124491	0.3658	0.104104	0.160047	0.360285	0.129187	0.162602	0.275551	0.193718	0.165855	0.380108	0.0745261	0.216597	0.165272	0.223921	0.166318	0.178629	0.264793	0.209348	0.131167	0.192104	0.210454	0.071469	0.0111616		441.897	0.00232847
		442.288	0.0906921	0.162489	0.146289	0.233832	0.192894	0.18275	0.21141	0.398617	0.232403	0.254182	0.235711	0.260723	0.150289	0.230075	0.264945	0.278118	0.289231	0.220428	0.196677	0.192238	0.154629	0.358774	0.109195	0.154509	0.356409	0.122964	0.150781	0.264412	0.22884	0.181029	0.429838	0.0824791	0.225214	0.150525	0.230124	0.156623	0.163652	0.288912	0.194218	0.140654	0.205802	0.21399	0.0767402	0.0119848		442.288	-0.00417951
		442.679	0.104245	0.170109	0.160939	0.236232	0.18318	0.186661	0.215576	0.419671	0.228915	0.262522	0.240795	0.262448	0.163128	0.216092	0.271812	0.258078	0.265251	0.211531	0.212135	0.187024	0.129778	0.365722	0.127579	0.169453	0.389164	0.123793	0.161963	0.313012	0.206999	0.196779	0.39579	0.0801254	0.218336	0.159192	0.228157	0.16876	0.171482	0.306109	0.208397	0.178055	0.187688	0.218114	0.0760716	0.0118804		442.679	-0.00553827
		443.07	0.0898347	0.159102	0.166845	0.297571	0.197653	0.199776	0.219418	0.411891	0.221178	0.2603	0.232911	0.274005	0.156495	0.222439	0.267883	0.280852	0.26654	0.190385	0.197464	0.18956	0.124343	0.350402	0.126253	0.157204	0.373068	0.122438	0.164733	0.289887	0.219985	0.167727	0.40104	0.0828173	0.239381	0.148499	0.249117	0.192278	0.159355	0.283989	0.208378	0.157961	0.195132	0.217466	0.0764713	0.0119428		443.07	-0.00370608
		443.461	0.107105	0.177489	0.144499	0.237462	0.196231	0.178568	0.21238	0.520993	0.227405	0.252298	0.240346	0.273973	0.161289	0.213509	0.272171	0.298367	0.289959	0.230338	0.21089	0.226541	0.152717	0.406663	0.125855	0.165244	0.383145	0.125773	0.166035	0.282738	0.243433	0.172339	0.440956	0.0863248	0.248187	0.149432	0.225883	0.174393	0.179433	0.299753	0.227741	0.152072	0.201887	0.226386	0.0880286	0.0137478		443.461	-0.000850553
		443.852	0.0979082	0.209743	0.169593	0.23683	0.216057	0.190633	0.214353	0.460532	0.253519	0.248947	0.236687	0.291798	0.156551	0.228189	0.293406	0.264407	0.281594	0.24469	0.221255	0.211897	0.155138	0.377107	0.104888	0.176026	0.38926	0.122858	0.172914	0.282156	0.212666	0.176887	0.45289	0.0924673	0.269024	0.163414	0.256835	0.184847	0.162494	0.303793	0.209269	0.187112	0.207311	0.228974	0.0822188	0.0128404		443.852	0.00748775
		444.243	0.0998012	0.187309	0.160617	0.231739	0.207958	0.214526	0.23229	0.46586	0.244735	0.276875	0.24493	0.295111	0.174663	0.2355	0.270894	0.285634	0.295129	0.236448	0.212382	0.240455	0.148816	0.432452	0.11364	0.174612	0.388376	0.138421	0.18416	0.273822	0.240992	0.178295	0.389109	0.0796908	0.253445	0.167681	0.236041	0.183939	0.175516	0.33077	0.223585	0.199143	0.201752	0.232369	0.0816069	0.0127449		444.243	-0.00558109
		444.634	0.104105	0.190034	0.178707	0.270375	0.212981	0.203733	0.249663	0.472364	0.255955	0.259006	0.25013	0.293497	0.16373	0.246262	0.308814	0.25503	0.291764	0.226679	0.222346	0.235966	0.154842	0.40356	0.130347	0.177182	0.390039	0.129763	0.185606	0.306058	0.227551	0.191017	0.419103	0.0877828	0.253005	0.159466	0.250578	0.174098	0.184636	0.306542	0.213594	0.178816	0.206807	0.234671	0.0814654	0.0127228		444.634	0.00246724
		445.025	0.109637	0.191309	0.189847	0.268235	0.216593	0.20087	0.220437	0.471684	0.254813	0.264146	0.289544	0.302732	0.165497	0.223041	0.31397	0.31544	0.308954	0.240186	0.228322	0.234617	0.187536	0.420984	0.134757	0.185538	0.411963	0.135806	0.175791	0.289942	0.236454	0.187818	0.428603	0.0783742	0.249164	0.161261	0.263177	0.193452	0.220035	0.322303	0.232367	0.15388	0.212207	0.241251	0.084579	0.013209		445.025	0.00222862
		445.416	0.0990459	0.160662	0.182187	0.29442	0.20069	0.20035	0.225788	0.508743	0.238561	0.272299	0.253587	0.301781	0.180448	0.222985	0.305873	0.325873	0.317847	0.242184	0.248223	0.233402	0.173173	0.4762	0.139416	0.204636	0.411386	0.146338	0.189244	0.311953	0.224599	0.228029	0.442159	0.0891309	0.254268	0.164882	0.264098	0.204191	0.175731	0.328789	0.224629	0.185213	0.222353	0.245741	0.0908275	0.0141849		445.416	0.00299193
		445.808	0.104246	0.168137	0.173093	0.284455	0.216682	0.193709	0.24735	0.431053	0.255675	0.287623	0.270356	0.31395	0.177465	0.25496	0.326377	0.282853	0.324484	0.22659	0.242862	0.242988	0.179761	0.395024	0.140504	0.197368	0.432492	0.144944	0.207031	0.303143	0.246424	0.196949	0.434054	0.101068	0.271083	0.149277	0.275064	0.190808	0.180343	0.363972	0.226391	0.183679	0.213585	0.245314	0.0830844	0.0129756		445.808	0.00773069
		446.199	0.118042	0.152114	0.172566	0.327947	0.236661	0.204127	0.25146	0.465357	0.276833	0.245414	0.298254	0.30387	0.177187	0.241218	0.303244	0.316759	0.313048	0.256749	0.232708	0.244684	0.161011	0.411283	0.148791	0.196955	0.421798	0.141012	0.190621	0.294609	0.231845	0.215284	0.47745	0.0936574	0.260636	0.174762	0.26945	0.210605	0.184714	0.354937	0.243432	0.197224	0.227248	0.249892	0.0867646	0.0135504		446.199	0.00545008
		446.59	0.105655	0.199867	0.196435	0.308635	0.229791	0.204924	0.266728	0.505666	0.265982	0.27966	0.296057	0.329179	0.187408	0.255927	0.331236	0.306703	0.318866	0.266305	0.240539	0.27925	0.169141	0.424536	0.163693	0.193921	0.41148	0.143471	0.202995	0.332207	0.279763	0.1931	0.440411	0.0914451	0.265097	0.171665	0.268334	0.214001	0.21593	0.317062	0.258523	0.192996	0.238655	0.25764	0.0857116	0.0133859		446.59	-0.00248858
		446.981	0.0899415	0.163559	0.207797	0.319207	0.216501	0.207048	0.26212	0.491111	0.287485	0.289881	0.282083	0.316782	0.21099	0.258129	0.320758	0.316605	0.317592	0.274987	0.240868	0.242272	0.176154	0.404847	0.1576	0.209763	0.445409	0.145886	0.209723	0.332794	0.229141	0.219786	0.493317	0.0901414	0.269223	0.179717	0.252904	0.214294	0.180036	0.36273	0.250684	0.204028	0.238339	0.258103	0.0900826	0.0140685		446.981	-0.00107542
		447.372	0.112591	0.208084	0.203094	0.301259	0.233057	0.189152	0.232136	0.501877	0.267316	0.285182	0.28327	0.329651	0.199475	0.274655	0.336789	0.30804	0.320325	0.241762	0.240795	0.276429	0.179993	0.405544	0.168053	0.203785	0.446212	0.160333	0.188018	0.329303	0.244394	0.25152	0.48935	0.0848279	0.285616	0.187809	0.267585	0.217938	0.196294	0.357752	0.252527	0.185137	0.234872	0.260532	0.088641	0.0138434		447.372	-0.00149974
		447.763	0.110534	0.195619	0.206703	0.334898	0.238626	0.217693	0.272815	0.460913	0.256083	0.309668	0.284604	0.335858	0.190623	0.254405	0.329683	0.369176	0.353484	0.267363	0.233109	0.237312	0.159463	0.432339	0.147339	0.213628	0.4411	0.150674	0.220293	0.33802	0.257472	0.228483	0.477237	0.100614	0.268827	0.168179	0.281177	0.20917	0.201919	0.375378	0.244639	0.198957	0.238032	0.26371	0.089847	0.0140317		447.763	-0.000735881
		448.154	0.100692	0.247571	0.204395	0.343081	0.231477	0.218265	0.251956	0.517263	0.27333	0.294306	0.301107	0.342413	0.205486	0.237498	0.328238	0.37794	0.342464	0.246655	0.244082	0.261569	0.175351	0.449188	0.145064	0.213947	0.473484	0.143527	0.2073	0.331698	0.258786	0.243215	0.452655	0.108688	0.310541	0.190823	0.314336	0.234357	0.213973	0.372039	0.237809	0.185764	0.236245	0.269965	0.09334	0.0145773		448.154	0.00462416
		448.545	0.0950364	0.229483	0.206219	0.292376	0.23952	0.233143	0.290976	0.551637	0.295159	0.296896	0.295733	0.339263	0.210364	0.290786	0.312462	0.337383	0.346213	0.278486	0.257572	0.241589	0.199644	0.417839	0.141216	0.186782	0.472352	0.147566	0.208074	0.341182	0.247976	0.238682	0.468826	0.101581	0.280088	0.185012	0.288932	0.218679	0.216985	0.390149	0.245163	0.184838	0.239051	0.269778	0.0941931	0.0147105		448.545	0.00100678
		448.936	0.0944583	0.217904	0.208591	0.319466	0.262195	0.24669	0.277393	0.558783	0.279939	0.302156	0.307439	0.355046	0.207926	0.284345	0.337529	0.34308	0.332565	0.256061	0.253885	0.260742	0.184517	0.416966	0.152797	0.214946	0.467123	0.163033	0.22099	0.336627	0.263839	0.217764	0.495114	0.104577	0.287455	0.199706	0.287035	0.236495	0.205017	0.377391	0.254715	0.229973	0.241759	0.274732	0.0936696	0.0146287		448.936	0.00112636
		449.327	0.115374	0.231083	0.220406	0.301527	0.251154	0.237716	0.285897	0.582813	0.303699	0.312468	0.315084	0.366112	0.199625	0.288006	0.329971	0.346802	0.343769	0.280725	0.244485	0.26317	0.190457	0.449673	0.150349	0.217594	0.474268	0.156405	0.219937	0.339069	0.246509	0.232041	0.478603	0.103692	0.276872	0.181604	0.288661	0.22586	0.211221	0.399646	0.25461	0.209341	0.243911	0.277322	0.0971771	0.0151765		449.327	-0.000375916
		449.718	0.115585	0.238049	0.218816	0.330948	0.251341	0.237071	0.291977	0.558957	0.30481	0.299494	0.292419	0.365242	0.21914	0.261823	0.342848	0.312734	0.36536	0.294418	0.269382	0.265754	0.190088	0.445686	0.142611	0.207716	0.482865	0.151123	0.222883	0.335602	0.240348	0.248219	0.536361	0.0980712	0.278334	0.199943	0.27923	0.243042	0.212953	0.394391	0.259853	0.208748	0.255604	0.279752	0.0984796	0.0153799		449.718	-0.00118363
		450.109	0.110473	0.206633	0.22073	0.368471	0.237516	0.243112	0.310712	0.561779	0.30366	0.311859	0.334784	0.375397	0.215535	0.271652	0.370583	0.357033	0.35998	0.273394	0.268076	0.254957	0.205805	0.451066	0.165478	0.227832	0.468436	0.167759	0.229012	0.358157	0.296214	0.240091	0.544552	0.108772	0.311389	0.195471	0.287808	0.244475	0.211547	0.405135	0.264699	0.223094	0.245265	0.28801	0.0998353	0.0155917		450.109	0.0021658
		450.5	0.0957897	0.232042	0.233981	0.329774	0.259052	0.240774	0.306576	0.548008	0.311122	0.306563	0.322638	0.384944	0.201426	0.285232	0.342189	0.347766	0.333893	0.261377	0.276332	0.271287	0.205236	0.411531	0.164843	0.238207	0.494605	0.161795	0.212316	0.368505	0.298968	0.25296	0.525193	0.10575	0.282735	0.207559	0.32853	0.249267	0.214343	0.422551	0.248988	0.233084	0.261418	0.287296	0.0968118	0.0151195		450.5	0.00212022
		450.892	0.116473	0.221678	0.224282	0.419162	0.286757	0.254243	0.304602	0.554917	0.312366	0.340199	0.318134	0.383249	0.205162	0.273276	0.358408	0.366601	0.343095	0.302744	0.264198	0.27936	0.207783	0.458554	0.179708	0.223548	0.493733	0.16383	0.234351	0.363235	0.269677	0.251222	0.51486	0.105005	0.276603	0.211364	0.309081	0.242499	0.196259	0.413778	0.276331	0.220608	0.254272	0.292566	0.0994124	0.0155256		450.892	-0.00383382
		451.283	0.117887	0.231757	0.21639	0.359218	0.290746	0.249336	0.291883	0.544845	0.303336	0.35944	0.32759	0.389088	0.216266	0.292271	0.352705	0.367517	0.33514	0.287802	0.278732	0.276565	0.220891	0.438697	0.180624	0.222983	0.519334	0.162417	0.230308	0.339703	0.277169	0.232217	0.504154	0.101023	0.324912	0.200019	0.338336	0.245206	0.221208	0.403224	0.276593	0.229943	0.284016	0.293695	0.0964731	0.0150666		451.283	0.0018902
		451.674	0.11873	0.217242	0.239627	0.357187	0.295879	0.239103	0.327735	0.56306	0.336374	0.342069	0.337794	0.368329	0.210104	0.297259	0.352736	0.351078	0.375188	0.324009	0.25944	0.260022	0.210016	0.440461	0.163196	0.214053	0.515548	0.179827	0.234327	0.369788	0.270144	0.292626	0.53583	0.107589	0.32626	0.186695	0.340236	0.27408	0.215448	0.399894	0.276986	0.222353	0.289235	0.298477	0.0999492	0.0156094		451.674	-0.00308979
		452.065	0.119239	0.251586	0.228645	0.394587	0.301829	0.260474	0.313438	0.599434	0.335237	0.326401	0.345801	0.382734	0.217102	0.312616	0.376616	0.371626	0.360513	0.330469	0.283452	0.279592	0.214119	0.464562	0.175309	0.239766	0.53263	0.192123	0.237303	0.376607	0.313127	0.279444	0.541692	0.107876	0.287846	0.204427	0.312296	0.270323	0.226307	0.419273	0.288659	0.255409	0.288998	0.307792	0.102348	0.0159841		452.065	-0.000172773
		452.456	0.100411	0.228423	0.244463	0.395986	0.311946	0.284529	0.333295	0.53772	0.358998	0.338999	0.358487	0.393187	0.222599	0.31432	0.335148	0.402817	0.38753	0.286685	0.288304	0.304961	0.222377	0.466505	0.172095	0.221656	0.519452	0.167403	0.231287	0.368731	0.291288	0.264003	0.51764	0.115631	0.309223	0.205757	0.328418	0.263868	0.245541	0.434591	0.276768	0.231677	0.274972	0.306285	0.0998666	0.0155965		452.456	0.0054878
		452.847	0.100513	0.232805	0.250631	0.4038	0.293235	0.234482	0.321258	0.615035	0.359515	0.340264	0.357031	0.414726	0.232601	0.314634	0.349269	0.370568	0.388254	0.337732	0.300418	0.312977	0.212665	0.520768	0.195452	0.255231	0.556732	0.171685	0.267028	0.383018	0.305127	0.261508	0.552311	0.11587	0.324668	0.215132	0.339873	0.268667	0.259079	0.463966	0.296694	0.255341	0.277151	0.317749	0.10954	0.0171073		452.847	0.000298262
		453.238	0.108311	0.224551	0.230183	0.36804	0.312314	0.275095	0.325318	0.603898	0.368032	0.338465	0.376367	0.414338	0.222557	0.315475	0.371151	0.414867	0.370361	0.328796	0.26649	0.292053	0.211691	0.475086	0.1719	0.259981	0.539886	0.176679	0.24285	0.409397	0.290719	0.273021	0.587716	0.118084	0.331258	0.214114	0.338765	0.263321	0.244041	0.449642	0.306292	0.21479	0.297182	0.315685	0.110129	0.0171993		453.238	0.00309806
		453.629	0.128539	0.279151	0.236655	0.389943	0.299755	0.256976	0.357009	0.629543	0.340751	0.383599	0.382364	0.414665	0.233444	0.327849	0.390025	0.390711	0.392764	0.331353	0.292915	0.321845	0.214213	0.461949	0.200072	0.251545	0.576095	0.185522	0.215921	0.417132	0.297518	0.274389	0.565273	0.116713	0.340034	0.217082	0.345021	0.263357	0.237864	0.456127	0.305328	0.265629	0.291707	0.323862	0.109829	0.0171524		453.629	-0.00690865
		454.02	0.128302	0.268486	0.263519	0.40689	0.32102	0.271508	0.334091	0.646721	0.348522	0.356986	0.392788	0.42872	0.245707	0.33131	0.408243	0.366531	0.369609	0.383041	0.294749	0.306269	0.222143	0.528551	0.218608	0.265261	0.556043	0.187579	0.25531	0.375537	0.304189	0.275406	0.566854	0.115076	0.346621	0.222194	0.360747	0.285851	0.270131	0.438469	0.293429	0.26891	0.302956	0.33007	0.108505	0.0169456		454.02	-0.0016118
		454.411	0.111717	0.225249	0.252708	0.424331	0.331139	0.281863	0.350781	0.617504	0.331904	0.354	0.387816	0.451111	0.223961	0.338879	0.386026	0.425255	0.394361	0.366156	0.292082	0.294526	0.231145	0.530776	0.195536	0.257904	0.593249	0.176421	0.256404	0.378325	0.303527	0.303182	0.556129	0.110531	0.31624	0.221622	0.34156	0.281137	0.251919	0.453255	0.289492	0.259467	0.307452	0.328211	0.113334	0.0176998		454.411	-0.00366956
		454.802	0.127433	0.262291	0.250487	0.394427	0.315573	0.265492	0.342845	0.639387	0.339942	0.370287	0.395356	0.435753	0.249316	0.344015	0.408979	0.451427	0.381174	0.368475	0.29678	0.343266	0.225465	0.482359	0.198104	0.26451	0.572706	0.194113	0.247415	0.409635	0.305432	0.300217	0.524451	0.116692	0.340613	0.23116	0.359831	0.284419	0.242843	0.492968	0.298522	0.305558	0.306377	0.333807	0.108909	0.0170087		454.802	0.00148091
		455.193	0.135537	0.249676	0.282346	0.400528	0.303248	0.264394	0.368291	0.631645	0.36093	0.36723	0.398601	0.460339	0.255899	0.315703	0.409589	0.480489	0.404222	0.334273	0.31019	0.34837	0.237982	0.546855	0.187457	0.250384	0.567889	0.188795	0.267609	0.421211	0.335763	0.29244	0.604503	0.127899	0.332117	0.226165	0.356501	0.287097	0.254331	0.481651	0.297062	0.23301	0.309667	0.338729	0.116066	0.0181265		455.193	0.00288368
		455.585	0.122434	0.251947	0.261907	0.394707	0.318666	0.273003	0.373381	0.681464	0.367954	0.391591	0.403465	0.458534	0.249841	0.344819	0.405723	0.402378	0.411595	0.363622	0.296774	0.326953	0.233426	0.510143	0.189514	0.252372	0.585024	0.188041	0.267395	0.419663	0.283762	0.282071	0.593882	0.126141	0.34205	0.232407	0.346186	0.312351	0.258756	0.489787	0.326932	0.276129	0.300525	0.339447	0.117052	0.0182804		455.585	0.00124885
		455.976	0.136349	0.268252	0.285261	0.455081	0.332988	0.252304	0.379071	0.689695	0.365513	0.388796	0.407675	0.473385	0.249997	0.348457	0.412864	0.432858	0.412351	0.377484	0.31992	0.305374	0.236723	0.576886	0.211297	0.235534	0.580838	0.185136	0.252312	0.42232	0.291716	0.283394	0.589053	0.132914	0.358086	0.229181	0.345554	0.307673	0.275374	0.475966	0.302439	0.277232	0.327874	0.346126	0.120125	0.0187603		455.976	0.00321419
		456.367	0.122799	0.248813	0.290876	0.405245	0.32428	0.272124	0.368303	0.707758	0.369928	0.37372	0.407352	0.479777	0.243152	0.354372	0.411515	0.375087	0.408301	0.357999	0.299961	0.302739	0.23886	0.554532	0.210649	0.269824	0.609891	0.195987	0.280953	0.429295	0.324623	0.285314	0.581699	0.124829	0.354796	0.241064	0.353241	0.287021	0.280452	0.524356	0.299556	0.278043	0.307346	0.345279	0.120961	0.018891		456.367	-0.00471394
		456.758	0.140218	0.258253	0.281475	0.467058	0.314853	0.278474	0.384027	0.709917	0.378115	0.385376	0.447672	0.475741	0.24141	0.340971	0.407672	0.377182	0.390818	0.364087	0.313855	0.317291	0.224961	0.511143	0.209542	0.243891	0.605245	0.19223	0.263997	0.404979	0.30073	0.324404	0.633843	0.129915	0.366467	0.237219	0.346053	0.320334	0.268043	0.512121	0.320477	0.266118	0.323652	0.348288	0.122569	0.0191421		456.758	0.000890185
		457.149	0.133652	0.255368	0.270589	0.482832	0.346205	0.264639	0.387657	0.688256	0.371573	0.391293	0.441952	0.474417	0.266956	0.366755	0.423403	0.426444	0.397771	0.374419	0.306467	0.331996	0.268544	0.50875	0.213702	0.258138	0.625125	0.199987	0.277301	0.41467	0.300585	0.313009	0.582025	0.130035	0.357559	0.251512	0.348306	0.306653	0.302863	0.506358	0.309142	0.264137	0.325248	0.352836	0.118181	0.0184568		457.149	0.00394066
		457.54	0.138033	0.229536	0.294244	0.431238	0.357939	0.297964	0.391149	0.70416	0.394435	0.400658	0.436003	0.483585	0.262987	0.368152	0.380016	0.46014	0.434813	0.357808	0.314944	0.340708	0.235943	0.530518	0.219091	0.266594	0.641204	0.193947	0.287844	0.436203	0.317195	0.331109	0.599391	0.130753	0.370005	0.252953	0.36965	0.309895	0.284885	0.508922	0.334676	0.249933	0.323719	0.357877	0.121962	0.0190473		457.54	-0.00641979
		457.931	0.121234	0.265798	0.299152	0.432638	0.350755	0.290611	0.388013	0.646722	0.39253	0.409247	0.447497	0.502004	0.254829	0.377979	0.402284	0.411629	0.45196	0.385393	0.306363	0.374746	0.255982	0.556399	0.212104	0.261776	0.662146	0.200051	0.284425	0.420942	0.354983	0.319557	0.611695	0.13282	0.379749	0.256715	0.391982	0.33793	0.26929	0.511071	0.330525	0.254754	0.327067	0.362033	0.121214	0.0189305		457.931	-0.00289821
		458.322	0.141399	0.284995	0.282164	0.455851	0.376126	0.299742	0.403959	0.719422	0.393008	0.405706	0.432254	0.498554	0.262047	0.361041	0.425477	0.480508	0.394237	0.363726	0.297813	0.334265	0.260266	0.52045	0.205815	0.26407	0.645949	0.211618	0.298035	0.428208	0.332777	0.316484	0.617077	0.138859	0.378837	0.251927	0.377353	0.324325	0.291496	0.548	0.31941	0.268363	0.324069	0.364285	0.12378	0.0193312		458.322	0.00565345
		458.713	0.130475	0.238934	0.291956	0.510187	0.364155	0.268923	0.395036	0.752225	0.391665	0.403168	0.431767	0.515227	0.270854	0.377431	0.439816	0.412743	0.423983	0.410014	0.314858	0.338829	0.258445	0.554338	0.223792	0.296423	0.65263	0.203935	0.296462	0.44816	0.341293	0.32448	0.614299	0.129433	0.37887	0.240782	0.390222	0.330573	0.303721	0.534052	0.307742	0.255767	0.33026	0.368242	0.12972	0.0202589		458.713	0.000424947
		459.104	0.131987	0.268283	0.304532	0.464918	0.353164	0.287778	0.428632	0.674716	0.38442	0.415336	0.465732	0.520821	0.261954	0.37919	0.416265	0.477124	0.400781	0.408535	0.291228	0.3573	0.26714	0.542591	0.226408	0.275024	0.634796	0.179622	0.299325	0.466801	0.320108	0.343359	0.642817	0.135808	0.37003	0.245146	0.370061	0.338571	0.287852	0.557169	0.331437	0.258954	0.332848	0.368745	0.125783	0.0196439		459.104	0.00415826
		459.495	0.132974	0.256687	0.30242	0.453924	0.371897	0.290193	0.420946	0.719882	0.411242	0.407266	0.460902	0.545953	0.266986	0.35852	0.417679	0.439745	0.434148	0.386761	0.307692	0.350196	0.272274	0.57371	0.218626	0.267177	0.671374	0.185157	0.281188	0.44142	0.340645	0.359377	0.654603	0.13374	0.383076	0.257412	0.374044	0.331918	0.296266	0.560619	0.300841	0.271202	0.360878	0.372477	0.131747	0.0205755		459.495	0.000507394
		459.886	0.144809	0.237231	0.302138	0.495882	0.371042	0.286912	0.439548	0.757956	0.363973	0.426853	0.448122	0.522591	0.262493	0.380386	0.416971	0.498904	0.415027	0.399263	0.290858	0.33219	0.269855	0.580433	0.230345	0.268556	0.691784	0.195861	0.293624	0.441177	0.31956	0.354909	0.603531	0.133362	0.395694	0.265167	0.396889	0.348893	0.272395	0.554253	0.341146	0.300593	0.3487	0.375607	0.133257	0.0208112		459.886	-0.00181234
		460.277	0.124333	0.303349	0.320361	0.455053	0.373237	0.287301	0.445345	0.749513	0.396687	0.421969	0.476539	0.53049	0.277617	0.392983	0.429045	0.403424	0.423601	0.394702	0.290357	0.356054	0.288222	0.630813	0.239916	0.286329	0.690864	0.184395	0.308714	0.471827	0.361164	0.355489	0.702683	0.146339	0.391574	0.270869	0.428304	0.342768	0.311036	0.553218	0.325142	0.28017	0.334899	0.38431	0.136221	0.0212742		460.277	-0.00220031
		460.669	0.135645	0.252962	0.32219	0.516892	0.378665	0.300804	0.418235	0.756981	0.412232	0.424402	0.46972	0.51142	0.288057	0.415556	0.423187	0.463726	0.419701	0.375145	0.284961	0.370443	0.260242	0.573519	0.214888	0.255774	0.688919	0.180198	0.306897	0.4537	0.372127	0.327334	0.647194	0.135977	0.369865	0.262572	0.398812	0.345136	0.298918	0.573027	0.322244	0.28766	0.349334	0.379641	0.135422	0.0211494		460.669	-0.000654285
		461.06	0.134202	0.274553	0.308113	0.53379	0.374108	0.269946	0.427853	0.749339	0.422961	0.433526	0.474798	0.532925	0.287646	0.408267	0.439387	0.472809	0.440725	0.421806	0.290569	0.380116	0.270796	0.552304	0.213788	0.281245	0.689748	0.193481	0.325103	0.439022	0.345492	0.392995	0.701252	0.140111	0.406072	0.269338	0.401877	0.363343	0.300167	0.583219	0.329066	0.283163	0.354033	0.388123	0.137292	0.0214414		461.06	-0.00126661
		461.451	0.14361	0.257407	0.307706	0.524781	0.402288	0.273795	0.441788	0.76447	0.401241	0.414045	0.484801	0.537696	0.286389	0.394265	0.430122	0.53399	0.424158	0.403078	0.28339	0.374103	0.272962	0.590925	0.233708	0.270616	0.68015	0.180794	0.317392	0.461282	0.361619	0.360074	0.662755	0.139937	0.418457	0.261042	0.395759	0.362831	0.31605	0.582799	0.337778	0.334115	0.363684	0.389948	0.137435	0.0214638		461.451	0.00282241
		461.842	0.138397	0.288643	0.34604	0.505891	0.360945	0.304034	0.424627	0.766971	0.412593	0.435106	0.462306	0.543594	0.28815	0.402123	0.472526	0.470819	0.440849	0.442952	0.292203	0.361344	0.286173	0.61974	0.241488	0.265705	0.691747	0.181219	0.324402	0.470772	0.350792	0.363727	0.692906	0.146672	0.357892	0.269702	0.40372	0.369389	0.313782	0.566919	0.35211	0.304476	0.362256	0.392578	0.137369	0.0214534		461.842	-0.00293034
		462.233	0.123357	0.297412	0.316323	0.5407	0.397439	0.301757	0.447605	0.759919	0.417371	0.458804	0.470287	0.555476	0.305076	0.41208	0.458594	0.481438	0.454971	0.431562	0.317579	0.366127	0.273043	0.553165	0.241077	0.2756	0.705469	0.202924	0.327015	0.455944	0.371084	0.374348	0.640276	0.134107	0.412375	0.283858	0.399777	0.375588	0.290438	0.577331	0.341709	0.315005	0.368039	0.395904	0.134242	0.0209651		462.233	-0.000274089
		462.624	0.11944	0.321896	0.341826	0.574534	0.426774	0.295551	0.459815	0.758905	0.397692	0.451856	0.523199	0.575174	0.298228	0.444921	0.46224	0.492579	0.420082	0.439648	0.298029	0.3727	0.276944	0.595011	0.255716	0.270876	0.715365	0.186632	0.30918	0.497918	0.331451	0.407507	0.674073	0.143615	0.419016	0.276791	0.400188	0.358371	0.31308	0.601866	0.335955	0.282783	0.37093	0.402399	0.142477	0.0222512		462.624	-0.00356396
		463.015	0.133039	0.292934	0.32473	0.572511	0.427961	0.284763	0.477912	0.816762	0.404494	0.458329	0.48854	0.564993	0.298795	0.414736	0.46865	0.538444	0.457711	0.39998	0.308406	0.365966	0.270986	0.614748	0.246177	0.285534	0.737229	0.182784	0.31922	0.469158	0.381916	0.364662	0.693327	0.147904	0.383244	0.268483	0.419853	0.362471	0.31867	0.601093	0.342682	0.343876	0.35963	0.405202	0.147663	0.0230611		463.015	0.00264331
		463.406	0.153288	0.311668	0.319581	0.573557	0.402073	0.305932	0.461253	0.748838	0.424015	0.443891	0.499774	0.564478	0.294445	0.436681	0.47449	0.447559	0.442597	0.430673	0.337626	0.412818	0.278013	0.640819	0.227314	0.301188	0.735417	0.194635	0.320322	0.500937	0.335308	0.41292	0.670287	0.155398	0.407787	0.275056	0.456411	0.362637	0.334895	0.627989	0.369114	0.28167	0.363252	0.40821	0.141171	0.0220471		463.406	0.00389237
		463.797	0.149605	0.310745	0.344854	0.61578	0.432314	0.289579	0.488514	0.791643	0.432175	0.435779	0.527862	0.590927	0.303196	0.434261	0.402747	0.43482	0.450197	0.446774	0.328104	0.379646	0.315167	0.595174	0.244393	0.286895	0.719334	0.204717	0.328674	0.467802	0.384841	0.401774	0.666312	0.150308	0.391109	0.291721	0.44921	0.356462	0.31078	0.586724	0.358993	0.323884	0.377099	0.409778	0.139731	0.0218223		463.797	-0.00361345
		464.188	0.140674	0.262907	0.337629	0.551327	0.41909	0.321946	0.485952	0.829065	0.439206	0.463455	0.481184	0.58835	0.322465	0.426407	0.517749	0.483141	0.468231	0.445978	0.338146	0.366543	0.286668	0.578821	0.26422	0.3106	0.723635	0.197821	0.360125	0.486938	0.373039	0.398759	0.65946	0.149854	0.403478	0.289264	0.438879	0.379188	0.335	0.594238	0.356487	0.32527	0.404049	0.414762	0.140467	0.0219373		464.188	-0.00581317
		464.579	0.136396	0.285258	0.346118	0.566551	0.433893	0.313439	0.494014	0.7951	0.408931	0.46444	0.533716	0.579505	0.302913	0.427873	0.475575	0.558488	0.470854	0.433805	0.337561	0.367959	0.314047	0.577594	0.256595	0.301513	0.763246	0.214309	0.331351	0.48542	0.386281	0.387801	0.692445	0.152574	0.404007	0.290407	0.389135	0.383146	0.344835	0.582322	0.366541	0.297862	0.382232	0.415513	0.14303	0.0223375		464.579	0.00211965
		464.97	0.116702	0.309992	0.3496	0.594988	0.410818	0.33431	0.513361	0.797913	0.428998	0.470988	0.529975	0.593424	0.307568	0.406645	0.477778	0.51718	0.467241	0.432444	0.332913	0.388649	0.317843	0.585308	0.264729	0.313329	0.763453	0.217032	0.336603	0.444512	0.40092	0.409599	0.717066	0.15495	0.378598	0.289381	0.41459	0.378599	0.33529	0.62182	0.351464	0.327723	0.38707	0.419302	0.14497	0.0226406		464.97	0.00113692
		465.362	0.14598	0.336727	0.36742	0.584227	0.411313	0.348026	0.493104	0.815786	0.444186	0.494964	0.531308	0.616189	0.305606	0.428849	0.48971	0.50745	0.455892	0.429722	0.339612	0.390825	0.321439	0.605846	0.264876	0.308346	0.742042	0.219336	0.350713	0.477621	0.400114	0.372285	0.716766	0.150271	0.389596	0.296692	0.430201	0.378407	0.337808	0.615413	0.359704	0.322554	0.396428	0.424228	0.143365	0.0223898		465.362	0.000833612
		465.753	0.126528	0.298077	0.368674	0.599361	0.410348	0.313249	0.509807	0.791604	0.434737	0.469131	0.535853	0.621046	0.328596	0.449799	0.448166	0.545969	0.485	0.479924	0.349068	0.384573	0.314382	0.558184	0.258433	0.315334	0.756776	0.227857	0.347166	0.482607	0.391926	0.388476	0.700241	0.150775	0.39034	0.298997	0.433121	0.398263	0.325336	0.651297	0.357841	0.327489	0.391968	0.424788	0.14487	0.0226249		465.753	-0.00746716
		466.144	0.134775	0.310163	0.332527	0.638104	0.458738	0.311476	0.503312	0.860055	0.447167	0.469909	0.553079	0.618315	0.32355	0.432756	0.452287	0.544078	0.428868	0.459552	0.352931	0.392691	0.330815	0.560519	0.276838	0.30952	0.784382	0.21765	0.347169	0.484625	0.382812	0.376463	0.68508	0.155675	0.409357	0.299554	0.396358	0.365336	0.34142	0.655882	0.380519	0.353758	0.383078	0.427345	0.150419	0.0234915		466.144	0.00239635
		466.535	0.123404	0.316555	0.33421	0.570792	0.431659	0.283325	0.504471	0.857437	0.457992	0.473234	0.550623	0.608339	0.308596	0.438414	0.46449	0.574727	0.491385	0.452967	0.349796	0.360944	0.300013	0.63414	0.252879	0.33851	0.790395	0.236801	0.351139	0.486583	0.405155	0.393752	0.713865	0.152192	0.416766	0.297907	0.451228	0.385336	0.347691	0.646497	0.382555	0.312432	0.400608	0.430483	0.154	0.0240508		466.535	-0.00168449
		466.926	0.124434	0.287793	0.352014	0.628122	0.462309	0.316847	0.527953	0.773235	0.431564	0.491769	0.547453	0.619779	0.319958	0.457029	0.483187	0.537224	0.469018	0.458544	0.363544	0.398287	0.306965	0.553491	0.28832	0.356507	0.761363	0.244576	0.33369	0.494302	0.351797	0.431879	0.725949	0.164862	0.407041	0.303892	0.415492	0.389882	0.330528	0.662971	0.351781	0.332378	0.391055	0.430458	0.145315	0.0226943		466.926	-0.0034363
		467.317	0.131417	0.323154	0.331736	0.65021	0.442881	0.340251	0.491039	0.844197	0.456683	0.467153	0.56007	0.61729	0.321443	0.477047	0.481714	0.562867	0.461145	0.501095	0.371091	0.39702	0.324419	0.596119	0.259957	0.339903	0.7604	0.229557	0.348697	0.467084	0.385599	0.383629	0.734043	0.158497	0.393558	0.305316	0.42376	0.407997	0.373767	0.666883	0.394675	0.321637	0.390051	0.436465	0.150944	0.0235734		467.317	0.0116474
		467.708	0.141316	0.308146	0.374229	0.596298	0.448334	0.332345	0.53399	0.780442	0.444749	0.479428	0.57829	0.631691	0.318579	0.437588	0.501512	0.51248	0.455959	0.481292	0.359395	0.414916	0.308422	0.664922	0.247947	0.335507	0.787711	0.225459	0.35391	0.500542	0.36474	0.433644	0.730143	0.152208	0.423034	0.303811	0.407204	0.382443	0.347804	0.636539	0.351421	0.345928	0.397548	0.434924	0.149494	0.023347		467.708	0.0149897
		468.099	0.138794	0.28182	0.382924	0.588476	0.441889	0.343776	0.527738	0.786892	0.47605	0.487397	0.574439	0.619821	0.334427	0.466	0.441527	0.468287	0.473389	0.497622	0.401225	0.396229	0.327368	0.591663	0.27862	0.352585	0.772837	0.230245	0.343295	0.497315	0.388514	0.402397	0.745625	0.158462	0.40966	0.309	0.432277	0.406259	0.342504	0.692824	0.375446	0.363399	0.39975	0.437775	0.145707	0.0227557		468.099	0.00242854
		468.49	0.13823	0.318091	0.367764	0.624909	0.46228	0.311737	0.501992	0.843274	0.474634	0.503231	0.549779	0.64741	0.324362	0.491516	0.449058	0.555644	0.452037	0.482818	0.354368	0.410789	0.303214	0.596125	0.273521	0.353094	0.787596	0.235341	0.333172	0.480631	0.375415	0.422961	0.751416	0.159069	0.419086	0.315424	0.40422	0.402594	0.378312	0.649799	0.39001	0.338685	0.393673	0.43969	0.15178	0.023704		468.49	0.000776079
		468.881	0.169909	0.30407	0.403711	0.635629	0.465858	0.335384	0.525419	0.81433	0.463602	0.492343	0.571328	0.624226	0.321511	0.453956	0.494829	0.505872	0.466269	0.544011	0.374658	0.423967	0.328473	0.597418	0.269895	0.348472	0.804671	0.223198	0.369713	0.485439	0.380904	0.4393	0.729787	0.159848	0.403285	0.308964	0.484109	0.427651	0.36796	0.675864	0.38836	0.353826	0.414771	0.447629	0.14811	0.023131		468.881	0.0044291
		469.272	0.14388	0.274377	0.388781	0.642384	0.458351	0.344325	0.546566	0.852402	0.466916	0.510182	0.564197	0.622485	0.340946	0.415964	0.446276	0.550952	0.489649	0.485381	0.382938	0.401664	0.333368	0.582749	0.267221	0.348376	0.762743	0.235822	0.365066	0.502316	0.370711	0.426757	0.681132	0.162065	0.426701	0.318087	0.462654	0.405691	0.370502	0.668296	0.375366	0.337407	0.406755	0.4424	0.147413	0.023022		469.272	0.00236645
		469.663	0.136829	0.274415	0.398156	0.618929	0.477264	0.332165	0.572173	0.824462	0.482381	0.493311	0.571441	0.667861	0.320835	0.463646	0.474489	0.550981	0.511887	0.483098	0.385896	0.425543	0.330403	0.589705	0.252113	0.358066	0.780842	0.235543	0.354809	0.535155	0.377452	0.421794	0.733124	0.16036	0.422493	0.320714	0.455053	0.435716	0.321916	0.655485	0.373795	0.378152	0.416065	0.448159	0.151734	0.0236969		469.663	0.00297258
		470.054	0.140788	0.314636	0.380828	0.655093	0.465422	0.306355	0.517895	0.846409	0.473725	0.519748	0.593848	0.652584	0.328204	0.476692	0.501489	0.509917	0.478972	0.499998	0.385977	0.403431	0.322561	0.620455	0.288618	0.350863	0.786145	0.231582	0.380924	0.503336	0.383078	0.414478	0.731561	0.159158	0.431286	0.318545	0.433782	0.432746	0.361701	0.709743	0.349882	0.372315	0.425249	0.450244	0.153906	0.0240361		470.054	0.00250968
		470.446	0.140298	0.349325	0.402405	0.691865	0.47985	0.304003	0.565662	0.802324	0.452478	0.477966	0.584592	0.657514	0.346756	0.460564	0.459854	0.472778	0.470798	0.467398	0.371877	0.420478	0.350036	0.593303	0.298093	0.374601	0.792027	0.251595	0.369585	0.514115	0.397897	0.433737	0.751684	0.168763	0.460935	0.309444	0.450857	0.453063	0.350053	0.659397	0.382317	0.376048	0.430385	0.452359	0.147402	0.0230203		470.446	0.00513472
		470.837	0.155902	0.299205	0.409766	0.633582	0.484761	0.345921	0.574447	0.786548	0.468403	0.48594	0.605799	0.672295	0.336104	0.460809	0.482541	0.594446	0.497502	0.472669	0.423692	0.438619	0.341671	0.599736	0.301509	0.34942	0.794798	0.263152	0.366541	0.512229	0.407465	0.443845	0.742128	0.168616	0.441395	0.328402	0.462773	0.418579	0.364084	0.707299	0.355592	0.31668	0.429146	0.457171	0.149078	0.0232821		470.837	-0.000592519
		471.228	0.139668	0.299516	0.390127	0.659647	0.487952	0.340144	0.561573	0.853145	0.46391	0.476703	0.600038	0.68417	0.327114	0.460455	0.497429	0.527903	0.477047	0.518999	0.380438	0.388407	0.374552	0.616924	0.294857	0.349185	0.814358	0.261513	0.364311	0.50987	0.390518	0.426365	0.776686	0.160011	0.429536	0.326671	0.464328	0.438524	0.347352	0.719978	0.384807	0.31814	0.429362	0.456884	0.158676	0.0247811		471.228	0.00218318
		471.619	0.146387	0.291781	0.380415	0.67385	0.501216	0.351552	0.572151	0.7852	0.438973	0.517962	0.611262	0.665901	0.352604	0.500995	0.445965	0.562582	0.478236	0.526213	0.395426	0.40379	0.345527	0.585384	0.312491	0.359916	0.824465	0.235599	0.372625	0.508395	0.373278	0.422705	0.771584	0.181003	0.439547	0.328319	0.485346	0.423801	0.385392	0.689353	0.349545	0.398984	0.439025	0.459384	0.152011	0.0237401		471.619	0.00718079
		472.01	0.155055	0.316285	0.388358	0.63654	0.493715	0.327268	0.548707	0.801807	0.484719	0.488232	0.591023	0.689837	0.356277	0.473533	0.490324	0.510762	0.499886	0.526179	0.399024	0.44043	0.359719	0.577453	0.287163	0.360204	0.807798	0.245528	0.382366	0.513696	0.380716	0.507456	0.733031	0.164247	0.411013	0.313618	0.474914	0.442034	0.361398	0.717673	0.371824	0.353487	0.433331	0.458942	0.149772	0.0233904		472.01	-0.00247226
		472.401	0.142194	0.304428	0.393987	0.673958	0.485758	0.323634	0.595375	0.821803	0.490404	0.4953	0.592605	0.685178	0.342295	0.49623	0.467473	0.514804	0.496934	0.507008	0.397367	0.410194	0.355067	0.608965	0.296314	0.371635	0.797424	0.241607	0.372531	0.490652	0.365328	0.472436	0.770344	0.159772	0.420457	0.319089	0.463852	0.427584	0.365091	0.685016	0.405873	0.388053	0.436877	0.459778	0.153557	0.0239815		472.401	-0.0093757
		472.792	0.14472	0.28157	0.386643	0.701226	0.498969	0.338615	0.579402	0.892282	0.491158	0.520781	0.601584	0.677743	0.355701	0.482076	0.508587	0.61927	0.497943	0.511672	0.3852	0.413035	0.377131	0.597251	0.285135	0.352832	0.800111	0.2537	0.362983	0.519861	0.397422	0.449886	0.712305	0.163784	0.428477	0.321575	0.49327	0.459378	0.389293	0.733083	0.383573	0.39499	0.452695	0.468705	0.159081	0.0248443		472.792	0.00533477
		473.183	0.15312	0.286553	0.412074	0.70064	0.494151	0.366622	0.582934	0.823215	0.481465	0.504885	0.616833	0.695674	0.365186	0.467029	0.559287	0.52976	0.484303	0.547701	0.391736	0.443484	0.384689	0.623685	0.312782	0.381214	0.800888	0.262961	0.363859	0.528008	0.40467	0.510864	0.752567	0.168949	0.436799	0.324694	0.482125	0.429017	0.3656	0.712806	0.39739	0.352502	0.439621	0.471764	0.153775	0.0240156		473.183	0.00431851
		473.574	0.148668	0.339581	0.407539	0.673819	0.491755	0.355471	0.57753	0.884051	0.460057	0.491214	0.600828	0.68916	0.349876	0.489307	0.505627	0.517973	0.477287	0.532899	0.396753	0.422128	0.338127	0.576722	0.29454	0.37222	0.821299	0.244752	0.380452	0.512414	0.410689	0.474393	0.762796	0.171161	0.444501	0.32677	0.471606	0.477865	0.368948	0.713947	0.38966	0.356008	0.414519	0.466705	0.156387	0.0244235		473.574	0.000616361
		473.965	0.132281	0.290698	0.415146	0.640234	0.486843	0.354331	0.588397	0.828003	0.472736	0.490325	0.605171	0.69655	0.344992	0.453899	0.528703	0.589916	0.489416	0.568173	0.382441	0.410615	0.37329	0.630944	0.31265	0.340683	0.82655	0.238963	0.3995	0.528278	0.3831	0.450399	0.71665	0.181296	0.42355	0.345503	0.452833	0.455011	0.370216	0.734288	0.381402	0.375966	0.459049	0.467049	0.155481	0.024282		473.965	-0.000805884
		474.356	0.155173	0.298228	0.413343	0.743957	0.509315	0.299363	0.57223	0.749019	0.50137	0.517511	0.625831	0.699756	0.371529	0.489669	0.49252	0.492743	0.487335	0.54549	0.39464	0.428682	0.35989	0.641899	0.308661	0.365557	0.819341	0.244773	0.385016	0.522201	0.380954	0.487447	0.784247	0.18197	0.424644	0.323808	0.479198	0.446017	0.371893	0.723404	0.398218	0.344609	0.439629	0.468807	0.156298	0.0244097		474.356	-0.00516798
		474.747	0.141915	0.265939	0.413246	0.719112	0.539454	0.320377	0.582416	0.897316	0.51187	0.499386	0.624553	0.704802	0.346722	0.501043	0.488179	0.540178	0.50564	0.577607	0.414853	0.423417	0.36401	0.641352	0.312327	0.372455	0.827477	0.244842	0.402917	0.529811	0.405122	0.480395	0.774481	0.169627	0.429217	0.327601	0.4841	0.474123	0.362783	0.699151	0.398193	0.382515	0.454299	0.476947	0.164105	0.0256288		474.747	0.00513609
		475.139	0.146221	0.310312	0.410308	0.710525	0.533761	0.321833	0.591114	0.891124	0.484888	0.49971	0.631496	0.71871	0.353713	0.4894	0.523446	0.542457	0.494343	0.489684	0.39914	0.456927	0.334238	0.647099	0.308782	0.353508	0.873415	0.25434	0.385783	0.546774	0.358961	0.498728	0.737703	0.16499	0.43486	0.329312	0.462807	0.467448	0.382087	0.682205	0.393194	0.339769	0.44865	0.473262	0.164774	0.0257334		475.139	-0.00452233
		475.53	0.161524	0.349255	0.411166	0.76282	0.522927	0.332233	0.602368	0.852663	0.488257	0.520345	0.647934	0.728534	0.354699	0.504387	0.504531	0.58073	0.514692	0.475918	0.415957	0.452198	0.363603	0.642363	0.317647	0.379727	0.857054	0.241583	0.403328	0.530322	0.373614	0.491224	0.796569	0.166022	0.425834	0.32913	0.445807	0.459585	0.386734	0.704552	0.373689	0.367118	0.452159	0.480263	0.164598	0.0257059		475.53	0.00413312
		475.921	0.14612	0.31544	0.430028	0.68615	0.550142	0.340043	0.618206	0.884952	0.464549	0.545436	0.634291	0.715028	0.361119	0.536385	0.503361	0.564981	0.461887	0.548538	0.393847	0.408521	0.395252	0.585153	0.318629	0.380431	0.827931	0.258594	0.377794	0.491137	0.363659	0.481323	0.76262	0.164059	0.452784	0.348893	0.454813	0.458487	0.373977	0.742776	0.411524	0.353939	0.447421	0.477079	0.161247	0.0251826		475.921	-0.00381707
		476.312	0.137215	0.322009	0.408802	0.69633	0.544299	0.332687	0.599283	0.933396	0.500619	0.516732	0.645004	0.727453	0.372492	0.510544	0.482223	0.555835	0.47129	0.57715	0.392394	0.447484	0.345337	0.623929	0.337819	0.373482	0.852872	0.245405	0.410538	0.511696	0.407816	0.525657	0.730371	0.164722	0.429112	0.319317	0.467515	0.488708	0.391985	0.768315	0.39096	0.378217	0.457109	0.482784	0.167068	0.0260917		476.312	0.000211226
		476.703	0.162027	0.301683	0.422878	0.673257	0.507048	0.31757	0.607855	0.839029	0.521958	0.539504	0.618106	0.72812	0.364127	0.495527	0.54944	0.555211	0.473635	0.573183	0.407152	0.439121	0.3524	0.61301	0.337927	0.355748	0.848806	0.239867	0.400526	0.529905	0.377793	0.473065	0.816075	0.164962	0.443433	0.341765	0.466399	0.486077	0.373719	0.744697	0.381307	0.38588	0.449663	0.479987	0.1629	0.0254406		476.703	-0.00765808
		477.094	0.147185	0.327584	0.41208	0.748328	0.557043	0.329524	0.625158	0.862817	0.483983	0.518627	0.672941	0.732983	0.357833	0.497205	0.493131	0.558838	0.527542	0.617734	0.381531	0.461435	0.359605	0.685626	0.315995	0.388349	0.848183	0.248531	0.390447	0.513263	0.360944	0.474405	0.734759	0.177322	0.437113	0.345183	0.459254	0.461468	0.39008	0.792996	0.395585	0.336819	0.471618	0.485391	0.16942	0.026459		477.094	-0.00139019
		477.485	0.150659	0.287156	0.437429	0.73313	0.554244	0.332524	0.596779	0.848606	0.484817	0.508239	0.656501	0.75482	0.34952	0.507685	0.505233	0.57573	0.497026	0.574003	0.398275	0.446264	0.364415	0.661267	0.316835	0.372839	0.86499	0.262645	0.388259	0.512251	0.374139	0.461923	0.776031	0.183265	0.413912	0.348751	0.473183	0.483583	0.390829	0.74211	0.373197	0.400858	0.450183	0.483271	0.166252	0.0259643		477.485	0.00402236
		477.876	0.146085	0.314735	0.43539	0.756814	0.539506	0.36822	0.64484	0.896007	0.491078	0.548679	0.648677	0.735944	0.365328	0.493301	0.49058	0.571564	0.492887	0.581015	0.38536	0.428422	0.335811	0.641409	0.312585	0.374398	0.859716	0.241361	0.391562	0.536356	0.393405	0.476628	0.760034	0.17243	0.439592	0.33605	0.474125	0.473871	0.378389	0.750474	0.397485	0.400193	0.446041	0.486008	0.169198	0.0264243		477.876	0.00541102
		478.267	0.152168	0.32217	0.419074	0.758878	0.525688	0.326412	0.613581	0.922299	0.507323	0.527493	0.665138	0.764079	0.366069	0.541601	0.517376	0.581781	0.488623	0.558714	0.379092	0.439442	0.368384	0.625728	0.337241	0.360729	0.844653	0.248584	0.393725	0.541821	0.392852	0.468323	0.749552	0.183776	0.4806	0.362193	0.508967	0.4575	0.404419	0.796432	0.394693	0.428607	0.469934	0.492578	0.169393	0.0264547		478.267	-0.00297926
		478.658	0.154413	0.297277	0.416189	0.744216	0.548084	0.350742	0.626662	0.890293	0.484041	0.535458	0.64251	0.735504	0.359451	0.517795	0.516278	0.547059	0.478334	0.574168	0.395794	0.417017	0.345895	0.639449	0.323877	0.389162	0.872329	0.248928	0.408413	0.516608	0.35919	0.457496	0.762863	0.187041	0.484434	0.348071	0.465214	0.475865	0.397553	0.773534	0.373388	0.38358	0.468742	0.485681	0.168334	0.0262894		478.658	0.00156323
		479.049	0.133642	0.313969	0.445775	0.754732	0.533635	0.325546	0.631992	0.830898	0.482424	0.541031	0.67527	0.745971	0.383235	0.51002	0.53961	0.559929	0.493152	0.544042	0.408185	0.445393	0.396274	0.621662	0.312778	0.3797	0.871492	0.243412	0.407671	0.516861	0.385279	0.464553	0.786228	0.192052	0.424218	0.336682	0.458274	0.492681	0.40723	0.718565	0.394679	0.394671	0.444452	0.486533	0.164389	0.0256733		479.049	0.000190564
		479.44	0.137679	0.333162	0.448976	0.777971	0.5285	0.347121	0.618816	0.860907	0.526154	0.557751	0.698054	0.728871	0.371094	0.52267	0.485897	0.598593	0.467271	0.60229	0.412719	0.407017	0.36301	0.663204	0.325115	0.378718	0.876982	0.246147	0.397679	0.528822	0.384194	0.452605	0.730462	0.187734	0.436775	0.34811	0.49209	0.461979	0.389534	0.775781	0.400026	0.408345	0.46898	0.49141	0.16864	0.0263371		479.44	0.00308995
		479.831	0.139345	0.300122	0.455957	0.734147	0.533223	0.374919	0.628325	0.865225	0.487071	0.537075	0.636169	0.740822	0.35616	0.491612	0.465262	0.626151	0.45615	0.606029	0.390056	0.42495	0.370292	0.593568	0.305617	0.360695	0.891195	0.252108	0.396933	0.499322	0.364572	0.514056	0.718708	0.189263	0.44193	0.325758	0.473754	0.514808	0.398994	0.782833	0.381061	0.391241	0.464318	0.484873	0.16775	0.0261982		479.831	0.00576675
		480.223	0.148754	0.332405	0.434765	0.798298	0.531421	0.349144	0.661749	0.882705	0.507268	0.532924	0.677941	0.743149	0.369432	0.509136	0.466021	0.505032	0.500201	0.535073	0.39793	0.445117	0.384097	0.620212	0.331568	0.359148	0.856956	0.24431	0.411193	0.54176	0.384917	0.50862	0.760774	0.177448	0.439169	0.343204	0.439005	0.489819	0.385255	0.781357	0.389135	0.388594	0.4706	0.488673	0.169259	0.0264337		480.223	-0.00106603
		480.614	0.153403	0.291343	0.449757	0.723444	0.57439	0.339448	0.617674	0.852675	0.564011	0.532765	0.661722	0.756254	0.368876	0.513129	0.488308	0.550288	0.491235	0.552274	0.396876	0.433219	0.374947	0.664561	0.323013	0.385284	0.853954	0.24276	0.401836	0.546332	0.406976	0.459572	0.755865	0.187696	0.429177	0.346347	0.469174	0.500418	0.400504	0.752012	0.361816	0.372833	0.461737	0.487998	0.16514	0.0257906		480.614	0.00579173
		481.005	0.154318	0.299065	0.457106	0.763774	0.536995	0.329395	0.65856	0.83488	0.518631	0.55509	0.675568	0.767926	0.368446	0.508715	0.461461	0.585942	0.497164	0.562185	0.402355	0.412724	0.370386	0.641374	0.353192	0.351207	0.87143	0.241171	0.400938	0.529149	0.362408	0.504328	0.78676	0.189863	0.469672	0.356571	0.487827	0.50895	0.410662	0.759315	0.382033	0.377142	0.45993	0.49182	0.168971	0.0263888		481.005	-0.000295811
		481.396	0.131174	0.284981	0.411422	0.772263	0.530445	0.313627	0.64386	0.860669	0.486466	0.526908	0.664645	0.761876	0.359089	0.505122	0.460763	0.631736	0.506311	0.585482	0.400478	0.458923	0.343863	0.667554	0.342722	0.379452	0.868825	0.236399	0.389544	0.513486	0.394278	0.506204	0.791575	0.171767	0.426179	0.362123	0.466995	0.49839	0.397806	0.745846	0.394111	0.40706	0.472734	0.489589	0.173287	0.0270629		481.396	0.00148798
		481.787	0.161253	0.330005	0.434003	0.709226	0.520709	0.33428	0.650723	0.896937	0.498622	0.519457	0.679692	0.766695	0.374577	0.50366	0.494447	0.577147	0.475946	0.593704	0.393334	0.421687	0.38071	0.625278	0.325338	0.390114	0.871458	0.259669	0.422421	0.549137	0.405842	0.502158	0.761124	0.167613	0.453077	0.354858	0.488951	0.505247	0.376483	0.740142	0.384028	0.378313	0.489701	0.491897	0.166643	0.0260253		481.787	-0.000778291
		482.178	0.140548	0.290607	0.445526	0.79952	0.534464	0.354842	0.626137	0.821434	0.492453	0.544489	0.659039	0.771837	0.365463	0.542517	0.524623	0.625526	0.483983	0.617017	0.392206	0.41878	0.390051	0.631959	0.329783	0.383554	0.861673	0.237905	0.392228	0.494167	0.391024	0.477727	0.739028	0.171227	0.440505	0.348092	0.461165	0.501558	0.413879	0.76648	0.402871	0.362066	0.459481	0.490425	0.168968	0.0263884		482.178	0.00374873
		482.569	0.149631	0.310312	0.424012	0.741955	0.557065	0.338836	0.63185	0.820148	0.542296	0.523724	0.676588	0.763287	0.395662	0.516419	0.489871	0.575353	0.47967	0.582636	0.392764	0.439364	0.365369	0.62034	0.320193	0.393954	0.837776	0.248489	0.424248	0.527227	0.393773	0.517708	0.822629	0.185613	0.408861	0.35237	0.450674	0.478755	0.405469	0.756821	0.387953	0.398741	0.467376	0.490629	0.165062	0.0257784		482.569	-0.00113409
		482.96	0.140954	0.306775	0.424159	0.796119	0.56552	0.337083	0.629395	0.866106	0.486211	0.527215	0.678368	0.754307	0.376131	0.49254	0.477963	0.509561	0.486355	0.591177	0.400984	0.438219	0.384201	0.587853	0.329952	0.398045	0.882982	0.248888	0.411429	0.523224	0.378194	0.474192	0.747831	0.176166	0.450779	0.350973	0.459248	0.478067	0.394802	0.769274	0.415531	0.404816	0.462477	0.488148	0.168157	0.0262618		482.96	-0.000761707
		483.351	0.151634	0.287638	0.441986	0.787776	0.570081	0.343341	0.625188	0.905742	0.531458	0.538166	0.687088	0.754476	0.366939	0.557451	0.488066	0.55456	0.471932	0.652965	0.415837	0.43968	0.38785	0.603089	0.31074	0.393802	0.827108	0.246388	0.392167	0.515175	0.376439	0.484621	0.750048	0.175345	0.416795	0.344637	0.445555	0.4758	0.386529	0.786677	0.369119	0.425841	0.467165	0.491534	0.17186	0.0268401		483.351	-0.00293365
		483.742	0.155361	0.300078	0.433247	0.764719	0.580666	0.363672	0.644793	0.835304	0.511143	0.545211	0.706846	0.753772	0.371678	0.520949	0.535521	0.588805	0.463821	0.531804	0.414023	0.442923	0.407225	0.617783	0.3326	0.369312	0.870445	0.249019	0.395165	0.493377	0.35716	0.484888	0.753871	0.173053	0.446136	0.357468	0.477991	0.496655	0.402195	0.754527	0.378675	0.398258	0.462443	0.491283	0.16619	0.0259545		483.742	-0.00205835
		484.133	0.135967	0.291784	0.450968	0.687034	0.563695	0.327802	0.665201	0.846171	0.503017	0.543445	0.725433	0.789567	0.37631	0.540614	0.501415	0.612264	0.483719	0.61425	0.391217	0.434211	0.403496	0.592715	0.352389	0.385873	0.829397	0.243351	0.372395	0.502497	0.36581	0.505123	0.732804	0.169366	0.454622	0.35964	0.459534	0.476692	0.406408	0.756098	0.369926	0.426446	0.468506	0.490663	0.16621	0.0259577		484.133	0.00440375
		484.524	0.138656	0.297197	0.451283	0.751873	0.556884	0.324786	0.64441	0.903535	0.527881	0.508863	0.710788	0.788626	0.379864	0.524775	0.522387	0.575688	0.486225	0.596905	0.395444	0.433622	0.360474	0.63041	0.329606	0.385777	0.88501	0.241627	0.401539	0.51785	0.375729	0.503977	0.731554	0.175746	0.442635	0.349377	0.451512	0.512801	0.376377	0.777701	0.387733	0.401765	0.473406	0.493471	0.174594	0.027267		484.524	0.00448129
		484.916	0.144126	0.300921	0.462643	0.792915	0.574869	0.341261	0.671848	0.795787	0.507705	0.55039	0.680245	0.763813	0.375618	0.516722	0.478661	0.543725	0.466862	0.577848	0.410793	0.421808	0.380638	0.58174	0.33812	0.373847	0.855026	0.246206	0.406657	0.515716	0.372461	0.516216	0.767536	0.175839	0.476576	0.36428	0.460192	0.510764	0.409954	0.783403	0.404593	0.364527	0.475812	0.491675	0.166402	0.0259876		484.916	-0.00114773
		485.307	0.147027	0.284588	0.434032	0.744097	0.56411	0.313938	0.633568	0.828006	0.506211	0.498174	0.705007	0.751765	0.374709	0.544811	0.484023	0.509349	0.484107	0.569316	0.41425	0.440328	0.398069	0.635518	0.325474	0.376255	0.863206	0.227949	0.403237	0.500268	0.37643	0.493473	0.755968	0.18119	0.430782	0.353467	0.479205	0.494761	0.410078	0.792908	0.391411	0.392443	0.484183	0.487749	0.167399	0.0261433		485.307	0.00681914
		485.698	0.14587	0.271594	0.453537	0.80631	0.553321	0.311021	0.656321	0.809619	0.523581	0.520036	0.644686	0.760737	0.380116	0.542618	0.500577	0.551328	0.473249	0.580306	0.359846	0.413334	0.404035	0.626148	0.316296	0.374244	0.835516	0.242673	0.394259	0.500036	0.369069	0.479133	0.79281	0.170996	0.445845	0.357881	0.460949	0.485374	0.390743	0.785561	0.37119	0.391547	0.465372	0.485797	0.170457	0.026621		485.698	0.00688774
		486.089	0.153988	0.299188	0.426154	0.758591	0.54293	0.3099	0.691049	0.818113	0.480525	0.519478	0.680005	0.781286	0.369036	0.517047	0.47081	0.523733	0.463911	0.575384	0.403539	0.435824	0.375519	0.624558	0.3351	0.341278	0.877043	0.235017	0.396415	0.51871	0.327831	0.534098	0.712508	0.173944	0.428588	0.358523	0.438605	0.492692	0.403559	0.762264	0.380245	0.410884	0.468322	0.483322	0.168756	0.0263553		486.089	-0.00312351
		486.48	0.1379	0.314478	0.450654	0.798561	0.557018	0.30472	0.679961	0.871893	0.507918	0.518981	0.687423	0.769563	0.367004	0.489746	0.479995	0.548576	0.470548	0.557612	0.376656	0.431749	0.384416	0.630413	0.343623	0.365498	0.847268	0.252781	0.410092	0.530509	0.38168	0.506349	0.715621	0.178025	0.432185	0.344042	0.458504	0.509642	0.386496	0.761074	0.378183	0.396452	0.482543	0.488204	0.169777	0.0265147		486.48	-0.00355324
		486.871	0.160632	0.300954	0.463175	0.724297	0.536426	0.31003	0.659325	0.823257	0.516201	0.517571	0.668514	0.779203	0.366067	0.561961	0.517998	0.554704	0.477932	0.607783	0.391251	0.439785	0.420956	0.621105	0.338077	0.366998	0.819683	0.225338	0.411433	0.514212	0.367345	0.551492	0.726271	0.180501	0.411827	0.35593	0.461808	0.508579	0.391613	0.772617	0.376996	0.388647	0.475758	0.489372	0.163571	0.0255455		486.871	0.00742026
		487.262	0.136441	0.306188	0.424012	0.731241	0.587643	0.309765	0.664761	0.870224	0.484226	0.521191	0.650458	0.781027	0.370399	0.492203	0.504128	0.515497	0.451742	0.576937	0.393946	0.421883	0.401053	0.581129	0.318557	0.380727	0.845203	0.227291	0.414646	0.494788	0.34353	0.491785	0.763257	0.176142	0.44459	0.328895	0.421594	0.489607	0.386209	0.742368	0.372403	0.42048	0.473101	0.480763	0.168468	0.0263103		487.262	-0.00521228
		487.653	0.157882	0.340662	0.443855	0.764803	0.558392	0.335027	0.638821	0.818489	0.505787	0.520674	0.663822	0.761096	0.360434	0.52304	0.49736	0.516021	0.435425	0.619513	0.388648	0.449026	0.398563	0.55595	0.330102	0.37703	0.878702	0.229934	0.401788	0.517283	0.356654	0.526439	0.781481	0.178473	0.463346	0.337764	0.449975	0.50336	0.397638	0.738842	0.37687	0.419128	0.459794	0.487266	0.165143	0.025791		487.653	-0.00200389
		488.044	0.158947	0.294554	0.420762	0.805443	0.579176	0.313074	0.660225	0.851166	0.467814	0.466587	0.697393	0.755851	0.358326	0.533176	0.440554	0.549826	0.447972	0.581715	0.354759	0.435558	0.379068	0.60135	0.357665	0.370727	0.846839	0.239372	0.403818	0.488209	0.334737	0.537816	0.737033	0.17148	0.427585	0.337698	0.481581	0.487399	0.386197	0.719917	0.381649	0.384268	0.459625	0.480656	0.169369	0.026451		488.044	1.98117e-05
		488.435	0.159539	0.345401	0.467284	0.741393	0.525567	0.335211	0.66839	0.75403	0.487226	0.499724	0.667693	0.784597	0.363587	0.526901	0.475698	0.518294	0.441889	0.606162	0.380848	0.371348	0.41819	0.592698	0.313632	0.354207	0.837272	0.235037	0.396417	0.505379	0.334254	0.518273	0.671088	0.179333	0.391923	0.348719	0.448402	0.534164	0.356627	0.693941	0.359515	0.368306	0.466432	0.474258	0.158367	0.0247327		488.435	0.00145798
		488.826	0.137718	0.3403	0.44496	0.762877	0.55124	0.323256	0.655252	0.768309	0.501149	0.491482	0.681039	0.776524	0.372187	0.494474	0.482365	0.594914	0.435299	0.609209	0.381812	0.432279	0.383198	0.56675	0.312381	0.366292	0.832428	0.234126	0.396458	0.492497	0.356068	0.541966	0.652474	0.170159	0.440416	0.333643	0.46686	0.480647	0.36559	0.686137	0.361219	0.423586	0.467127	0.477236	0.159001	0.0248317		488.826	0.00344636
		489.217	0.133257	0.283457	0.44078	0.762251	0.572379	0.285111	0.670946	0.812381	0.49999	0.472817	0.672325	0.751391	0.363147	0.516836	0.477114	0.556364	0.439425	0.561399	0.364654	0.423696	0.3693	0.603224	0.327264	0.356119	0.842896	0.228647	0.387453	0.505196	0.348214	0.551941	0.753326	0.179293	0.409817	0.353038	0.450227	0.470203	0.377825	0.665209	0.367147	0.399232	0.468739	0.474976	0.166249	0.0259637		489.217	0.00872715
		489.608	0.129166	0.298499	0.438671	0.824217	0.566592	0.320359	0.662795	0.782535	0.490196	0.497973	0.6648	0.76055	0.358219	0.516654	0.449591	0.55451	0.446686	0.5975	0.384198	0.391817	0.376936	0.581616	0.347838	0.343416	0.864528	0.241267	0.408476	0.49551	0.352231	0.52153	0.717155	0.172807	0.452083	0.334736	0.447098	0.490043	0.388327	0.6541	0.358077	0.380511	0.463384	0.476273	0.165584	0.0258599		489.608	0.00373821
		490	0.139152	0.237133	0.421623	0.774555	0.559571	0.319961	0.646446	0.786966	0.48704	0.499815	0.648079	0.745907	0.36144	0.500388	0.455675	0.516222	0.425756	0.604198	0.379274	0.419898	0.365315	0.572321	0.352186	0.362001	0.831738	0.237634	0.395409	0.473323	0.352499	0.520581	0.690524	0.170887	0.43432	0.346409	0.442866	0.48871	0.373902	0.700503	0.36626	0.380196	0.455061	0.469311	0.161289	0.0251891		490	-0.00487998
		490.391	0.134561	0.280055	0.413175	0.73174	0.551518	0.309799	0.652489	0.83994	0.495015	0.5234	0.647747	0.76453	0.368686	0.469588	0.410358	0.543786	0.461369	0.606575	0.377245	0.41015	0.375208	0.55352	0.333493	0.358046	0.84523	0.236309	0.384479	0.489946	0.320437	0.464058	0.711319	0.173823	0.387694	0.319438	0.411736	0.500012	0.389486	0.67455	0.358805	0.394055	0.476792	0.467077	0.164784	0.0257349		490.391	-0.00258272
		490.782	0.1516	0.294191	0.422201	0.782606	0.550266	0.298833	0.687654	0.808616	0.46181	0.485958	0.657444	0.774616	0.353528	0.522899	0.456016	0.532018	0.427731	0.572472	0.352875	0.417585	0.380244	0.575128	0.332821	0.360951	0.801224	0.23971	0.391164	0.490437	0.34129	0.506627	0.682992	0.171861	0.417919	0.319317	0.415271	0.47828	0.381326	0.686952	0.356032	0.374316	0.465375	0.467809	0.162617	0.0253964		490.782	-0.00291281
		491.173	0.139443	0.270765	0.412868	0.741695	0.578198	0.314087	0.649537	0.794612	0.494491	0.494193	0.67812	0.734594	0.370533	0.513256	0.478902	0.548425	0.434704	0.556945	0.371707	0.417892	0.387023	0.576046	0.317165	0.36941	0.79167	0.239907	0.401708	0.476173	0.309192	0.516877	0.701804	0.160593	0.419588	0.334554	0.433495	0.475179	0.389526	0.711608	0.342777	0.38535	0.462089	0.468212	0.160333	0.0250399		491.173	-0.00339803
		491.564	0.127663	0.285974	0.442756	0.792233	0.542292	0.336173	0.631471	0.806745	0.456872	0.479508	0.659011	0.770473	0.353595	0.4798	0.454271	0.553401	0.441116	0.560498	0.372627	0.418246	0.387753	0.592415	0.339705	0.35895	0.804276	0.239673	0.393725	0.470992	0.332459	0.4932	0.709936	0.155068	0.389493	0.298553	0.411167	0.46277	0.399198	0.735878	0.368359	0.366878	0.466959	0.466881	0.165286	0.0258133		491.564	0.00390949
		491.955	0.13523	0.285027	0.403042	0.822161	0.563429	0.279513	0.660601	0.764323	0.479019	0.488618	0.665255	0.759347	0.340664	0.495825	0.472362	0.468602	0.439793	0.614363	0.35916	0.422226	0.363996	0.584868	0.348349	0.361245	0.790543	0.238023	0.400844	0.464676	0.322805	0.481115	0.701311	0.175627	0.386991	0.277294	0.410668	0.486713	0.357912	0.732011	0.339113	0.378693	0.458961	0.462935	0.167165	0.0261069		491.955	0.00132843
		492.346	0.141474	0.255459	0.414325	0.830602	0.516255	0.300112	0.6421	0.76604	0.479281	0.498264	0.664404	0.745638	0.344478	0.515205	0.472078	0.542883	0.429306	0.580292	0.402634	0.387919	0.39979	0.579109	0.324001	0.347046	0.788108	0.226017	0.387815	0.475101	0.323057	0.500478	0.687189	0.166884	0.402338	0.299876	0.423385	0.460811	0.394738	0.747327	0.360183	0.379216	0.453537	0.46475	0.165157	0.0257932		492.346	-0.00043677
		492.737	0.120635	0.266384	0.426398	0.79823	0.552328	0.316337	0.616325	0.775958	0.490595	0.47699	0.686619	0.735019	0.362874	0.497863	0.428982	0.535855	0.427369	0.580213	0.342333	0.383932	0.383314	0.563602	0.340021	0.347405	0.784053	0.230302	0.40062	0.45652	0.361427	0.485783	0.67469	0.162714	0.421377	0.29983	0.430452	0.500871	0.369775	0.749563	0.336016	0.393558	0.464912	0.462879	0.163316	0.0255057		492.737	-0.00449307
		493.128	0.13715	0.274793	0.428334	0.743672	0.548926	0.310941	0.65155	0.766098	0.465594	0.501813	0.657207	0.787632	0.348815	0.514163	0.451493	0.532389	0.429785	0.555369	0.37004	0.409634	0.37587	0.561822	0.329961	0.376505	0.778889	0.225031	0.376278	0.451539	0.330331	0.522577	0.755053	0.165959	0.406516	0.286262	0.419736	0.477129	0.387433	0.782276	0.328563	0.351139	0.468631	0.464461	0.16688	0.0260623		493.128	0.00233736
		493.519	0.144459	0.259405	0.453923	0.763892	0.526559	0.296742	0.630068	0.729133	0.464777	0.484646	0.671371	0.744691	0.362139	0.5153	0.476496	0.457778	0.413233	0.60504	0.347408	0.401166	0.378674	0.591567	0.328077	0.332579	0.786026	0.217222	0.388949	0.461074	0.351616	0.484058	0.67802	0.165862	0.413625	0.28736	0.421822	0.472278	0.400362	0.754804	0.332048	0.388322	0.452286	0.459387	0.161023	0.0251476		493.519	0.00666053
		493.91	0.125361	0.282721	0.426598	0.718722	0.539919	0.28806	0.629609	0.734372	0.484679	0.479457	0.703135	0.739623	0.345875	0.472596	0.438948	0.467418	0.432843	0.572557	0.349706	0.40358	0.378943	0.519118	0.325616	0.345143	0.78457	0.216029	0.377713	0.437772	0.336131	0.465235	0.688499	0.171701	0.408217	0.301755	0.411735	0.480732	0.375018	0.739905	0.332951	0.3878	0.45084	0.452956	0.158637	0.0247749		493.91	0.000476191
		494.301	0.138169	0.309644	0.418497	0.702695	0.549224	0.303172	0.640199	0.704223	0.478385	0.499711	0.668764	0.741794	0.359925	0.503162	0.454794	0.508682	0.406235	0.57512	0.337788	0.367879	0.38389	0.533308	0.327687	0.372005	0.791942	0.217851	0.385779	0.439849	0.331557	0.475823	0.630495	0.170197	0.416049	0.287445	0.415704	0.505304	0.369054	0.755035	0.316947	0.380627	0.435604	0.453908	0.155238	0.0242441		494.301	0.0020177
		494.693	0.136625	0.278347	0.417183	0.739658	0.536377	0.292578	0.643775	0.764269	0.482862	0.477099	0.688083	0.720994	0.346018	0.485305	0.454276	0.522941	0.426702	0.593813	0.357798	0.392659	0.374925	0.538512	0.347782	0.344011	0.761693	0.214009	0.36328	0.479167	0.319564	0.467451	0.677078	0.174461	0.405472	0.334315	0.387131	0.489792	0.380819	0.763053	0.325427	0.356965	0.44084	0.456173	0.160115	0.0250058		494.693	-0.00278274
		495.084	0.13595	0.277143	0.4407	0.732081	0.519819	0.313491	0.611475	0.698343	0.447453	0.477294	0.658416	0.735064	0.347828	0.489541	0.462828	0.470366	0.405777	0.548556	0.343749	0.361054	0.354224	0.536039	0.325807	0.326421	0.766052	0.224296	0.393229	0.45007	0.319244	0.51227	0.656093	0.16351	0.408492	0.320819	0.407911	0.462437	0.372921	0.775089	0.320103	0.39781	0.443502	0.449104	0.155135	0.024228		495.084	0.00434287
		495.475	0.12987	0.238333	0.418997	0.742413	0.554319	0.315247	0.629023	0.692438	0.487816	0.471954	0.646342	0.723985	0.355401	0.511388	0.425244	0.467289	0.419742	0.547779	0.347084	0.388109	0.367056	0.550766	0.302041	0.328076	0.754073	0.21277	0.373104	0.419536	0.294293	0.4903	0.699627	0.16613	0.409525	0.315894	0.392627	0.511038	0.364065	0.741351	0.35004	0.389982	0.438521	0.44838	0.157599	0.0246129		495.475	0.00732601
		495.866	0.140946	0.285872	0.410415	0.752636	0.53451	0.281756	0.652251	0.735003	0.452645	0.496143	0.661205	0.714467	0.339373	0.509581	0.448523	0.477105	0.415371	0.538754	0.325004	0.398322	0.372083	0.492917	0.318067	0.349513	0.736707	0.205948	0.392936	0.455785	0.324655	0.467844	0.668724	0.168728	0.409284	0.310108	0.426354	0.493221	0.384832	0.748306	0.320252	0.384052	0.450336	0.450013	0.155806	0.0243328		495.866	-0.00602234
		496.257	0.122984	0.272599	0.40721	0.721359	0.520415	0.264718	0.63474	0.678999	0.442095	0.494846	0.670292	0.698773	0.341205	0.48361	0.411169	0.477631	0.407544	0.549201	0.322449	0.385062	0.354493	0.514971	0.31833	0.337063	0.738555	0.199705	0.367717	0.447058	0.284664	0.477116	0.663212	0.163974	0.3947	0.30632	0.42177	0.469115	0.365435	0.745029	0.319654	0.389142	0.425863	0.439288	0.155131	0.0242273		496.257	0.00417605
		496.648	0.139176	0.272202	0.412434	0.746437	0.503925	0.297655	0.579629	0.690727	0.476165	0.481571	0.633875	0.726683	0.351254	0.480369	0.394985	0.480694	0.397744	0.546188	0.343958	0.375896	0.347998	0.525354	0.317968	0.333508	0.738556	0.209738	0.382572	0.431519	0.322719	0.493943	0.68476	0.175636	0.41557	0.318395	0.420932	0.468496	0.359806	0.746492	0.323449	0.372567	0.43301	0.442794	0.152313	0.0237873		496.648	-0.000366317
		497.039	0.12747	0.232931	0.404553	0.732531	0.519948	0.284379	0.634348	0.685603	0.472866	0.475522	0.641959	0.732593	0.339068	0.505278	0.438264	0.49033	0.400302	0.604769	0.335925	0.401746	0.380484	0.514717	0.304898	0.333854	0.730304	0.208334	0.360676	0.407781	0.311546	0.468876	0.599905	0.159385	0.40394	0.322379	0.420526	0.449487	0.369369	0.725738	0.328993	0.366469	0.418514	0.44016	0.15372	0.0240071		497.039	-0.0021151
		497.43	0.110946	0.261448	0.420408	0.762149	0.520385	0.285417	0.610939	0.648211	0.46798	0.480699	0.635294	0.696939	0.325226	0.507868	0.437955	0.491646	0.385207	0.51625	0.345908	0.388553	0.373102	0.489658	0.303127	0.341265	0.726182	0.209778	0.382379	0.449764	0.319942	0.475298	0.605983	0.155841	0.39112	0.293118	0.376742	0.462399	0.364176	0.745961	0.314761	0.410506	0.441683	0.437371	0.151127	0.0236021		497.43	0.00523538
		497.821	0.138306	0.243545	0.405499	0.735388	0.533849	0.290532	0.619026	0.69418	0.454552	0.475162	0.650713	0.710768	0.345534	0.482334	0.446696	0.497345	0.381542	0.546387	0.338056	0.366232	0.360551	0.507107	0.293472	0.342442	0.746579	0.212789	0.374523	0.447647	0.312799	0.470231	0.638173	0.169968	0.398289	0.326102	0.369573	0.482553	0.360363	0.740749	0.330146	0.360764	0.435679	0.439906	0.153602	0.0239886		497.821	0.00286189
		498.212	0.120928	0.248444	0.423441	0.753822	0.548326	0.264691	0.605051	0.749267	0.461752	0.480353	0.659326	0.690655	0.334695	0.458959	0.452074	0.427757	0.369868	0.55154	0.33139	0.348339	0.366246	0.50605	0.315246	0.335858	0.727452	0.202757	0.372334	0.435026	0.278131	0.471289	0.616131	0.154184	0.39396	0.302741	0.411442	0.475749	0.369889	0.753026	0.296825	0.388543	0.42895	0.436159	0.158744	0.0247917		498.212	0.000189202
		498.603	0.133536	0.243386	0.417011	0.759779	0.487611	0.29098	0.626158	0.678652	0.456571	0.450735	0.625589	0.702539	0.338694	0.447612	0.432223	0.439271	0.384634	0.548205	0.322367	0.361359	0.368417	0.521966	0.293695	0.331733	0.735132	0.198016	0.369323	0.427652	0.294684	0.461966	0.650916	0.16331	0.404023	0.313614	0.386427	0.444868	0.363663	0.690394	0.316792	0.358471	0.424554	0.430891	0.151911	0.0237245		498.603	0.00893322
		498.994	0.123436	0.261818	0.431646	0.741563	0.531318	0.300761	0.593202	0.645102	0.466763	0.433945	0.645713	0.709489	0.346113	0.45696	0.417637	0.483295	0.37869	0.550752	0.310776	0.335253	0.359368	0.554973	0.282884	0.312806	0.743371	0.211669	0.369888	0.381869	0.292073	0.501786	0.603463	0.154327	0.360691	0.32046	0.372982	0.473795	0.360616	0.732674	0.311534	0.351017	0.42817	0.430357	0.154059	0.02406		498.994	0.000392821
		499.385	0.128018	0.232782	0.404273	0.773661	0.503864	0.253672	0.611903	0.728593	0.46404	0.447842	0.660202	0.702831	0.338945	0.463654	0.408875	0.420817	0.391156	0.523801	0.331677	0.37664	0.354579	0.486011	0.310219	0.336673	0.716511	0.205939	0.355583	0.403101	0.296733	0.460544	0.658004	0.162669	0.352726	0.313976	0.396943	0.450144	0.353793	0.711638	0.325635	0.35928	0.398256	0.428688	0.156548	0.0244487		499.385	-6.43713e-05
		499.777	0.148017	0.226525	0.399575	0.711519	0.489838	0.286828	0.588433	0.715466	0.463276	0.462857	0.634536	0.720533	0.339663	0.475541	0.420742	0.438808	0.360338	0.523669	0.343363	0.359487	0.354928	0.513917	0.310989	0.346531	0.730218	0.197973	0.366648	0.432765	0.269651	0.446489	0.60624	0.156274	0.33795	0.311445	0.386493	0.450795	0.374988	0.726167	0.306121	0.340534	0.416348	0.426646	0.15215	0.0237619		499.777	-0.00210014
		500.168	0.114178	0.238298	0.388584	0.693861	0.507875	0.272891	0.587168	0.690205	0.457189	0.442783	0.628742	0.695384	0.325017	0.474519	0.402341	0.488061	0.348424	0.548297	0.323391	0.32392	0.338593	0.479987	0.324206	0.319074	0.684948	0.204382	0.362884	0.413783	0.301011	0.460181	0.594326	0.173252	0.334095	0.296789	0.355956	0.464404	0.37793	0.738157	0.319092	0.326851	0.426272	0.420666	0.149665	0.0233737		500.168	0.0024916
		500.559	0.119817	0.242016	0.411505	0.749986	0.506031	0.262319	0.583502	0.598574	0.435638	0.443371	0.657571	0.715032	0.354992	0.463434	0.358639	0.430872	0.359003	0.511226	0.319293	0.35412	0.354805	0.510475	0.311753	0.301484	0.698847	0.199916	0.364091	0.394622	0.270536	0.440515	0.599619	0.149904	0.378393	0.304977	0.371309	0.458634	0.368926	0.763065	0.333506	0.34002	0.419704	0.419806	0.152345	0.0237924		500.559	-0.00292261
		500.95	0.119817	0.257793	0.408635	0.692601	0.5266	0.263887	0.58606	0.578206	0.429545	0.431021	0.61671	0.675044	0.317091	0.414028	0.388329	0.484546	0.348606	0.547153	0.313343	0.350277	0.354557	0.483154	0.309045	0.309311	0.689558	0.18744	0.351197	0.405258	0.307866	0.459476	0.590457	0.158116	0.334743	0.30536	0.371339	0.416638	0.322072	0.675065	0.290256	0.369515	0.41983	0.411208	0.141973	0.0221724		500.95	-0.00707726
		501.341	0.117257	0.24229	0.377569	0.728196	0.496954	0.275796	0.5789	0.629802	0.459549	0.45466	0.633138	0.6999	0.32552	0.433841	0.391381	0.385595	0.380666	0.543255	0.314552	0.344321	0.368908	0.470614	0.310789	0.319303	0.699621	0.204088	0.351736	0.413397	0.273817	0.424303	0.607065	0.15545	0.361399	0.300292	0.355113	0.442874	0.346072	0.684526	0.304966	0.368594	0.418987	0.414514	0.146749	0.0229183		501.341	0.00467287
		501.732	0.126904	0.234285	0.380126	0.659794	0.514562	0.263837	0.600911	0.68223	0.453296	0.419993	0.615905	0.717193	0.332605	0.455648	0.40115	0.409579	0.364491	0.50831	0.315522	0.35084	0.336875	0.442848	0.318454	0.334308	0.672942	0.189531	0.362309	0.408582	0.259247	0.412276	0.576598	0.160243	0.387312	0.307216	0.373018	0.438701	0.353585	0.660242	0.293835	0.37243	0.412243	0.411707	0.142752	0.0222941		501.732	0.00169284
		502.123	0.110578	0.253611	0.400619	0.728942	0.508367	0.266233	0.579194	0.615583	0.433047	0.423254	0.626405	0.668909	0.328415	0.467316	0.375961	0.4885	0.333923	0.547262	0.314365	0.340919	0.365911	0.484731	0.311034	0.31938	0.668549	0.190752	0.327759	0.406508	0.248613	0.465252	0.594523	0.158711	0.382336	0.303348	0.345804	0.43008	0.364754	0.700256	0.307296	0.355522	0.404589	0.413344	0.146263	0.0228425		502.123	-0.00121164
		502.514	0.122475	0.238309	0.416675	0.683678	0.489946	0.281883	0.583356	0.66047	0.428351	0.45215	0.598838	0.685749	0.329956	0.457272	0.391006	0.429795	0.351399	0.486208	0.312763	0.360061	0.335829	0.450605	0.320141	0.326147	0.652458	0.192074	0.352773	0.391202	0.276513	0.445675	0.593936	0.162017	0.355779	0.300582	0.369254	0.464419	0.333599	0.702975	0.308689	0.371689	0.416338	0.411781	0.14112	0.0220393		502.514	0.00887739
		502.905	0.13327	0.22813	0.368516	0.737155	0.475976	0.270979	0.600811	0.650388	0.451506	0.424186	0.618782	0.69881	0.307721	0.483357	0.431996	0.457297	0.353631	0.546284	0.283549	0.311943	0.344427	0.471826	0.29787	0.322647	0.675511	0.176733	0.331317	0.394329	0.27485	0.448035	0.602481	0.164438	0.349891	0.31742	0.327147	0.434825	0.364431	0.691158	0.297442	0.331611	0.422022	0.411578	0.150407	0.0234896		502.905	0.0014299
		503.296	0.126493	0.239339	0.367914	0.678179	0.500628	0.240305	0.56416	0.619532	0.451012	0.427034	0.611685	0.68345	0.318621	0.448474	0.377208	0.341245	0.352089	0.519219	0.297708	0.330587	0.365775	0.439476	0.286405	0.307252	0.682219	0.199647	0.35409	0.39789	0.270401	0.495489	0.588242	0.140904	0.352767	0.303973	0.378007	0.421956	0.336556	0.687838	0.291158	0.359438	0.412109	0.40406	0.143976	0.0224853		503.296	0.00421179
		503.687	0.126865	0.221257	0.391355	0.718567	0.507539	0.27629	0.57594	0.590962	0.425704	0.427363	0.632919	0.679329	0.307774	0.468119	0.396366	0.450867	0.354076	0.516816	0.287545	0.329599	0.351995	0.440681	0.311719	0.301189	0.686214	0.184598	0.323695	0.393112	0.250293	0.476301	0.580545	0.146173	0.3632	0.295875	0.345984	0.427231	0.343072	0.672738	0.28691	0.379802	0.396984	0.405941	0.145786	0.0227679		503.687	0.000928849
		504.078	0.122134	0.203166	0.411213	0.718697	0.509521	0.279146	0.569215	0.645083	0.434688	0.437444	0.593053	0.671069	0.305515	0.455264	0.390462	0.423457	0.354054	0.465003	0.285211	0.350288	0.335153	0.498549	0.269298	0.29883	0.655485	0.182904	0.325445	0.416864	0.266979	0.443934	0.609102	0.148539	0.359801	0.296965	0.351114	0.427066	0.352234	0.686574	0.282492	0.327373	0.408237	0.404064	0.146936	0.0229476		504.078	0.00343376
		504.47	0.0801706	0.198777	0.370547	0.689762	0.470916	0.272322	0.571794	0.607295	0.444645	0.409386	0.614	0.678978	0.30604	0.440212	0.416424	0.433162	0.328085	0.527035	0.278006	0.343691	0.324672	0.447605	0.287011	0.295195	0.643647	0.188704	0.315672	0.39712	0.248718	0.464654	0.561448	0.140328	0.330511	0.298372	0.329995	0.457579	0.347908	0.673771	0.265462	0.335024	0.387285	0.395657	0.146873	0.0229377		504.47	0.000897133
		504.861	0.112028	0.206415	0.382338	0.65293	0.485784	0.265615	0.569679	0.575092	0.448736	0.433779	0.609389	0.676394	0.309872	0.459355	0.41847	0.374744	0.323535	0.492947	0.286355	0.303655	0.318322	0.435845	0.293545	0.291651	0.67871	0.180465	0.343762	0.39979	0.26408	0.428781	0.557125	0.143307	0.335844	0.286779	0.347543	0.438673	0.334671	0.698125	0.273388	0.373745	0.398966	0.395371	0.143369	0.0223904		504.861	0.00297988
		505.252	0.116483	0.185851	0.400736	0.69893	0.4848	0.269411	0.575708	0.613726	0.414541	0.426032	0.580099	0.667413	0.316282	0.425984	0.406179	0.44359	0.371326	0.500949	0.306568	0.306871	0.30416	0.426767	0.28612	0.321429	0.654682	0.18043	0.347602	0.385101	0.263277	0.451578	0.55156	0.136504	0.34801	0.291555	0.348242	0.401045	0.31782	0.702293	0.299294	0.33956	0.40117	0.396821	0.143711	0.0224439		505.252	0.00111979
		505.643	0.135212	0.252217	0.378745	0.654217	0.490824	0.233271	0.555376	0.612721	0.444224	0.411662	0.600595	0.647547	0.315563	0.424448	0.383334	0.393207	0.326565	0.515343	0.297787	0.30578	0.323376	0.478024	0.290649	0.278788	0.646734	0.173121	0.341676	0.378992	0.293875	0.400555	0.539207	0.141955	0.329317	0.288536	0.348522	0.443132	0.319628	0.690959	0.279518	0.366753	0.377472	0.392913	0.138925	0.0216964		505.643	-0.00743807
		506.034	0.117968	0.231084	0.357998	0.620361	0.480344	0.229393	0.565101	0.605969	0.410758	0.440466	0.637044	0.659809	0.306536	0.425249	0.368182	0.410209	0.321152	0.496416	0.274184	0.336529	0.323696	0.446608	0.29829	0.284453	0.655966	0.186593	0.346925	0.377003	0.277178	0.432198	0.558128	0.135514	0.328284	0.28254	0.335202	0.430297	0.340971	0.662137	0.293204	0.318275	0.382496	0.390017	0.13992	0.0218519		506.034	-0.000535159
		506.425	0.137489	0.206846	0.382795	0.718063	0.476376	0.232084	0.57468	0.609631	0.413074	0.409248	0.577815	0.641471	0.321052	0.419653	0.365364	0.384512	0.332661	0.526209	0.296616	0.293626	0.32001	0.435773	0.273319	0.300632	0.635552	0.181207	0.325188	0.367073	0.263999	0.410502	0.602468	0.133987	0.33149	0.280562	0.34806	0.430843	0.320514	0.646096	0.286068	0.343196	0.385454	0.388811	0.142423	0.0222427		506.425	0.00488142
		506.816	0.101506	0.209067	0.360648	0.644388	0.480334	0.256631	0.549224	0.56624	0.41485	0.405559	0.601861	0.656302	0.305545	0.411588	0.380905	0.367328	0.32103	0.430162	0.278268	0.296035	0.322852	0.437649	0.278788	0.280005	0.631094	0.181608	0.309797	0.369264	0.259807	0.404153	0.553428	0.147307	0.314979	0.301168	0.356289	0.416275	0.313737	0.676217	0.273436	0.352898	0.3942	0.380791	0.137348	0.0214502		506.816	-0.00409066
		507.207	0.112729	0.235665	0.351683	0.702948	0.479105	0.265437	0.55999	0.597281	0.408879	0.412371	0.586662	0.627515	0.295905	0.426307	0.400726	0.378155	0.327366	0.499739	0.289529	0.297235	0.324407	0.446623	0.265297	0.280883	0.642424	0.174072	0.33395	0.340866	0.254262	0.422909	0.571332	0.141285	0.327688	0.287529	0.297496	0.409753	0.333844	0.669655	0.256293	0.327396	0.380501	0.383992	0.141995	0.022176		507.207	0.00619838
		507.598	0.116305	0.203275	0.356776	0.632632	0.466126	0.270232	0.55151	0.556796	0.422917	0.401644	0.566611	0.611008	0.29788	0.395769	0.362837	0.383049	0.325851	0.501006	0.279012	0.324798	0.315111	0.448695	0.294284	0.287577	0.641408	0.190434	0.33881	0.3611	0.248106	0.450879	0.546177	0.146294	0.321639	0.284994	0.344305	0.418072	0.295825	0.641414	0.280287	0.335355	0.372569	0.380228	0.131802	0.0205841		507.598	0.00210379
		507.989	0.121078	0.196792	0.372061	0.68712	0.447564	0.245087	0.553663	0.506258	0.448615	0.405985	0.585481	0.634499	0.281132	0.413945	0.384881	0.378132	0.331869	0.475091	0.277152	0.295294	0.316622	0.426739	0.285516	0.278846	0.641938	0.180279	0.307962	0.345938	0.24486	0.44852	0.526213	0.148238	0.309715	0.278386	0.32376	0.420897	0.319648	0.639763	0.270804	0.338511	0.370785	0.377211	0.136077	0.0212516		507.989	0.00237
		508.38	0.0866481	0.216902	0.370464	0.673331	0.47669	0.250176	0.540689	0.554093	0.385404	0.399021	0.58281	0.610833	0.280222	0.411571	0.377722	0.365546	0.325235	0.452962	0.283285	0.286103	0.300392	0.417312	0.275411	0.271138	0.63229	0.167594	0.32188	0.383922	0.230695	0.450996	0.555877	0.139636	0.32577	0.282655	0.322061	0.434823	0.3181	0.651373	0.264791	0.285932	0.367347	0.373895	0.13875	0.0216691		508.38	-0.00338938
		508.771	0.10294	0.208123	0.362645	0.654845	0.434847	0.239177	0.530431	0.573673	0.387842	0.383217	0.583927	0.637753	0.297944	0.405149	0.386233	0.336279	0.314179	0.463849	0.280358	0.288993	0.329854	0.427429	0.278778	0.307629	0.625767	0.173551	0.309465	0.345594	0.240442	0.441252	0.541265	0.145978	0.306113	0.27572	0.316338	0.387029	0.299043	0.658057	0.266719	0.361181	0.369783	0.372668	0.136232	0.0212759		508.771	-0.00209265
		509.162	0.101448	0.232662	0.348649	0.685211	0.442753	0.22956	0.552062	0.541137	0.430741	0.389805	0.546133	0.625513	0.287129	0.415165	0.356442	0.389284	0.31694	0.438804	0.262126	0.283418	0.313199	0.423966	0.277944	0.281122	0.602936	0.170778	0.314903	0.339838	0.23863	0.440229	0.52788	0.139277	0.3302	0.275767	0.316862	0.405417	0.311526	0.632853	0.257546	0.348967	0.379471	0.370836	0.133959	0.0209208		509.162	0.00165763
		509.554	0.102388	0.191656	0.348898	0.660551	0.455045	0.2449	0.550462	0.644624	0.398526	0.393157	0.544147	0.624063	0.288367	0.428986	0.361141	0.38327	0.31607	0.494212	0.26522	0.274481	0.325729	0.416787	0.25467	0.282452	0.607695	0.16539	0.328301	0.349525	0.250403	0.401784	0.519607	0.137622	0.322501	0.262952	0.308493	0.403886	0.322693	0.637952	0.255357	0.360937	0.371924	0.372118	0.138571	0.0216412		509.554	-0.000827286
		509.945	0.107517	0.217386	0.358458	0.628025	0.460929	0.263859	0.526438	0.559209	0.369779	0.376399	0.57039	0.621889	0.280349	0.385999	0.347347	0.351215	0.296807	0.462238	0.260798	0.28566	0.309088	0.405504	0.292894	0.257617	0.585875	0.176113	0.306699	0.340642	0.236228	0.422625	0.488799	0.125215	0.32393	0.260637	0.310601	0.430247	0.308773	0.683786	0.25037	0.30345	0.361102	0.36368	0.13365	0.0208726		509.945	0.00422528
		510.336	0.102927	0.191542	0.363292	0.672697	0.448703	0.220984	0.528059	0.542687	0.399818	0.390147	0.569969	0.60318	0.281719	0.414731	0.373626	0.358383	0.295677	0.452406	0.253787	0.266787	0.33242	0.403485	0.295934	0.246262	0.590005	0.172811	0.311339	0.308715	0.233806	0.405835	0.525392	0.126795	0.295147	0.267197	0.31581	0.396911	0.308468	0.646065	0.254722	0.2928	0.361922	0.361536	0.135904	0.0212247		510.336	0.00298105
		510.727	0.103576	0.164112	0.356407	0.637583	0.431486	0.251835	0.535883	0.572774	0.388107	0.379564	0.543318	0.607369	0.290263	0.403738	0.399684	0.398962	0.310329	0.474559	0.262067	0.293954	0.276682	0.459843	0.261384	0.272791	0.616874	0.164613	0.316555	0.324371	0.235409	0.433584	0.513068	0.131108	0.349652	0.278428	0.322175	0.38591	0.329874	0.63363	0.252495	0.310961	0.358322	0.366666	0.134771	0.0210477		510.727	-0.00322856
		511.118	0.107613	0.206192	0.326983	0.600691	0.437385	0.203089	0.525722	0.500741	0.37828	0.374012	0.546192	0.617493	0.28045	0.418823	0.346437	0.363036	0.309504	0.462348	0.253675	0.27079	0.291231	0.403419	0.257425	0.263874	0.576675	0.169552	0.311066	0.334013	0.238243	0.406733	0.485195	0.127534	0.351122	0.244694	0.319905	0.378812	0.307099	0.626047	0.252406	0.288936	0.355528	0.354121	0.127983	0.0199875		511.118	0.00412872
		511.509	0.10447	0.232586	0.341655	0.631176	0.424994	0.22267	0.517249	0.504496	0.388938	0.359246	0.542642	0.597274	0.279531	0.390579	0.354266	0.340632	0.302686	0.474791	0.25646	0.264242	0.298896	0.381619	0.282756	0.268193	0.580072	0.158281	0.317259	0.301835	0.219795	0.433381	0.507972	0.128942	0.331135	0.247513	0.317819	0.367467	0.30775	0.618141	0.233864	0.319005	0.343703	0.353561	0.128106	0.0200068		511.509	0.00111975
		511.9	0.116854	0.199332	0.329944	0.618754	0.435006	0.214104	0.52493	0.532041	0.38082	0.367412	0.553023	0.601037	0.275265	0.399776	0.327746	0.411067	0.296102	0.481316	0.244449	0.293517	0.28939	0.369455	0.264709	0.256293	0.583423	0.173092	0.295142	0.303503	0.262963	0.384167	0.451475	0.122358	0.293286	0.258164	0.295752	0.358324	0.316422	0.627032	0.251899	0.298803	0.348957	0.351393	0.128595	0.0200832		511.9	0.00634232
		512.291	0.111561	0.232708	0.324907	0.571645	0.434911	0.222165	0.512085	0.508824	0.375213	0.365432	0.537976	0.59673	0.28309	0.376111	0.302019	0.404861	0.288002	0.46728	0.251545	0.284284	0.298148	0.383407	0.273023	0.257477	0.54335	0.155902	0.290836	0.313974	0.21601	0.399087	0.535612	0.129582	0.286156	0.253821	0.300761	0.362268	0.303564	0.591548	0.241464	0.300049	0.340268	0.347016	0.123618	0.0193058		512.291	-0.00828077
		512.682	0.109321	0.219734	0.330642	0.604864	0.439322	0.223329	0.499557	0.503856	0.34	0.372737	0.531542	0.600283	0.275396	0.390394	0.352962	0.344158	0.288183	0.454433	0.260099	0.283734	0.296812	0.353401	0.269189	0.266479	0.541065	0.145715	0.299628	0.319635	0.211726	0.34898	0.487466	0.108667	0.291929	0.251936	0.309941	0.367994	0.287598	0.602761	0.22479	0.295897	0.355717	0.342973	0.124407	0.0194291		512.682	0.0027312
		513.073	0.0950436	0.212571	0.302992	0.648912	0.406268	0.23525	0.511962	0.483153	0.38768	0.349351	0.524303	0.571551	0.285139	0.379792	0.33995	0.299216	0.296313	0.416884	0.250898	0.272192	0.284324	0.363156	0.250322	0.242062	0.540069	0.158913	0.305363	0.30136	0.226377	0.405226	0.461543	0.122661	0.281302	0.243899	0.312219	0.363028	0.311403	0.60531	0.224337	0.258348	0.340101	0.338311	0.124558	0.0194526		513.073	-0.00504083
		513.464	0.0969712	0.210606	0.328076	0.614241	0.425559	0.227372	0.523904	0.540702	0.347032	0.35368	0.521417	0.588601	0.269382	0.386077	0.310338	0.395015	0.276993	0.455684	0.257898	0.25407	0.294221	0.360806	0.267425	0.250495	0.552738	0.148338	0.293009	0.317726	0.23649	0.377016	0.461495	0.133594	0.291713	0.245969	0.295089	0.360951	0.304489	0.59918	0.229468	0.303503	0.347084	0.342791	0.125718	0.0196339		513.464	-0.00185784
		513.855	0.103581	0.211199	0.323403	0.619856	0.416378	0.214934	0.494059	0.486647	0.348866	0.36751	0.529596	0.581724	0.2557	0.357525	0.325006	0.315092	0.284937	0.433194	0.237014	0.260465	0.283219	0.36467	0.226925	0.258625	0.547001	0.152795	0.297965	0.306505	0.217006	0.41259	0.443529	0.119539	0.299814	0.240781	0.291057	0.3765	0.291459	0.57521	0.223879	0.327113	0.322645	0.335256	0.122927	0.0191979		513.855	0.00658124
		514.247	0.108397	0.168364	0.318922	0.580394	0.43795	0.2231	0.50538	0.474338	0.368574	0.344628	0.499312	0.572508	0.261818	0.362961	0.34009	0.297388	0.268067	0.421946	0.235571	0.267087	0.288919	0.370747	0.232781	0.244516	0.541012	0.146089	0.298945	0.316571	0.215525	0.387576	0.455131	0.122691	0.290866	0.249632	0.27957	0.355407	0.290162	0.597845	0.237602	0.300457	0.316013	0.331582	0.121237	0.0189341		514.247	-0.00179816
		514.638	0.10008	0.18573	0.302847	0.558823	0.416123	0.217109	0.488267	0.518296	0.340381	0.367736	0.513392	0.552113	0.254764	0.373208	0.341924	0.285597	0.28085	0.490846	0.254595	0.281004	0.281969	0.37395	0.245238	0.257032	0.533546	0.147027	0.284689	0.287555	0.209016	0.391297	0.478674	0.126689	0.285798	0.247002	0.260836	0.377568	0.292526	0.582385	0.21952	0.274783	0.334875	0.332089	0.122115	0.0190711		514.638	-0.000769863
		515.029	0.0814491	0.168508	0.313695	0.557181	0.404557	0.219832	0.511281	0.445457	0.361228	0.378942	0.49025	0.546113	0.267412	0.367514	0.318252	0.276059	0.270135	0.407213	0.222515	0.263995	0.280018	0.37714	0.26965	0.240367	0.516515	0.157225	0.278006	0.309548	0.210633	0.378217	0.491854	0.119039	0.298401	0.229227	0.267617	0.362467	0.281463	0.578876	0.242229	0.321144	0.325997	0.327005	0.118163	0.018454		515.029	-0.00131211
		515.42	0.0960344	0.199404	0.31682	0.549064	0.435655	0.220545	0.497264	0.479405	0.360849	0.34822	0.528114	0.551414	0.260433	0.360537	0.278153	0.296548	0.250983	0.390468	0.224451	0.261462	0.281498	0.374818	0.252081	0.237484	0.516996	0.147759	0.288917	0.319257	0.212448	0.357933	0.433493	0.12034	0.289038	0.246654	0.273806	0.363171	0.269299	0.558293	0.22482	0.314791	0.327383	0.324783	0.116387	0.0181766		515.42	0.00520423
		515.811	0.100979	0.18393	0.31294	0.585729	0.39274	0.205777	0.455841	0.438471	0.346761	0.361412	0.525993	0.531286	0.260124	0.36176	0.357736	0.295998	0.253527	0.420325	0.21617	0.250604	0.281209	0.360912	0.22222	0.236254	0.517465	0.141528	0.29473	0.28633	0.209418	0.399971	0.445843	0.122761	0.280832	0.239027	0.268757	0.373002	0.280567	0.560698	0.218184	0.295724	0.322498	0.322342	0.117325	0.0183231		515.811	0.00649507
		516.202	0.0978567	0.167684	0.311527	0.574025	0.401798	0.197323	0.487178	0.448432	0.35378	0.337263	0.528588	0.559412	0.24318	0.349703	0.299807	0.279381	0.247198	0.438819	0.20979	0.227413	0.263477	0.360428	0.228782	0.229621	0.504192	0.147388	0.2849	0.271602	0.210528	0.349616	0.421358	0.112706	0.325009	0.237886	0.255025	0.346576	0.276346	0.567232	0.219564	0.259111	0.30449	0.315512	0.120692	0.018849		516.202	-0.00813825
		516.593	0.0958065	0.214846	0.320581	0.566183	0.395716	0.187381	0.471384	0.514732	0.338631	0.341734	0.528035	0.530931	0.248345	0.335433	0.327853	0.330197	0.25678	0.391165	0.217806	0.261337	0.277232	0.333462	0.215676	0.232658	0.509174	0.142278	0.279771	0.274617	0.233624	0.380113	0.466479	0.117183	0.262019	0.23362	0.277866	0.354787	0.28059	0.586651	0.227013	0.257416	0.317818	0.320364	0.119697	0.0186936		516.593	-0.00481899
		516.984	0.0786088	0.166952	0.302149	0.609508	0.396746	0.237479	0.477869	0.414498	0.325654	0.313009	0.501659	0.548588	0.248719	0.362685	0.316146	0.353498	0.241744	0.409584	0.226364	0.238679	0.272754	0.360791	0.243773	0.231483	0.500069	0.135868	0.281938	0.263795	0.209421	0.374025	0.446682	0.11047	0.26683	0.231034	0.258599	0.362462	0.298146	0.545439	0.213946	0.230108	0.306371	0.314979	0.119445	0.0186542		516.984	0.00387411
		517.375	0.0914109	0.167312	0.324381	0.566264	0.382205	0.184919	0.460554	0.426029	0.336382	0.319796	0.488789	0.510112	0.249946	0.371651	0.325461	0.300003	0.25227	0.395322	0.20741	0.240424	0.275246	0.334168	0.235535	0.220762	0.494657	0.140668	0.261528	0.296758	0.183434	0.377466	0.452573	0.108421	0.278528	0.21387	0.239339	0.337676	0.253539	0.543266	0.215039	0.295142	0.309218	0.308963	0.115024	0.0179637		517.375	0.00282622
		517.766	0.102382	0.180277	0.297512	0.549466	0.368549	0.220781	0.454061	0.403726	0.345121	0.323002	0.470137	0.522657	0.242979	0.331824	0.312503	0.271777	0.249978	0.43037	0.20145	0.198619	0.264382	0.337493	0.230626	0.212992	0.48131	0.139615	0.28312	0.261389	0.185663	0.366877	0.416839	0.114354	0.291754	0.216915	0.259609	0.346593	0.263629	0.538013	0.213587	0.274552	0.306845	0.304471	0.11088	0.0173165		517.766	0.00287439
		518.157	0.110564	0.154422	0.30257	0.563026	0.384504	0.194744	0.457619	0.392997	0.319626	0.325152	0.475283	0.528126	0.242558	0.359381	0.31878	0.280386	0.222356	0.42026	0.202373	0.233606	0.246009	0.313824	0.219368	0.222256	0.509987	0.134695	0.276189	0.260948	0.181804	0.34382	0.414537	0.123373	0.293696	0.233824	0.260329	0.340427	0.237303	0.531726	0.193986	0.258924	0.299734	0.302075	0.113818	0.0177753		518.157	0.00526294
		518.548	0.086924	0.15593	0.296648	0.536906	0.391204	0.18103	0.439102	0.398982	0.331276	0.329839	0.465036	0.506036	0.247628	0.341	0.306737	0.251633	0.237057	0.412944	0.218931	0.213625	0.27041	0.284911	0.226836	0.210271	0.479732	0.13777	0.260371	0.256001	0.173766	0.351973	0.408067	0.106219	0.257223	0.225448	0.262668	0.358121	0.264353	0.55029	0.217885	0.25496	0.309884	0.297942	0.111782	0.0174574		518.548	-0.00155476
		518.939	0.0916147	0.155597	0.303864	0.517013	0.361851	0.178632	0.457801	0.402689	0.335479	0.326104	0.482292	0.492203	0.242956	0.334315	0.304249	0.292053	0.250954	0.381509	0.227769	0.220749	0.255853	0.33355	0.213872	0.209324	0.448117	0.132832	0.289563	0.268734	0.202118	0.388225	0.40922	0.11281	0.257188	0.207797	0.274173	0.3472	0.239567	0.508701	0.193536	0.244434	0.298941	0.29745	0.107201	0.016742		518.939	-0.00105766
		519.331	0.0876604	0.15049	0.309696	0.56625	0.376044	0.171204	0.45599	0.402558	0.306803	0.313853	0.449348	0.509783	0.237813	0.364137	0.300263	0.295723	0.236203	0.382625	0.203242	0.24095	0.267413	0.32388	0.192863	0.221956	0.451494	0.130002	0.259612	0.271305	0.190947	0.359113	0.395487	0.122843	0.256889	0.210195	0.266595	0.334946	0.247926	0.531734	0.1887	0.245864	0.29783	0.29581	0.11116	0.0173602		519.331	0.00361859
		519.722	0.0953963	0.1369	0.294713	0.525267	0.371196	0.192355	0.44056	0.371572	0.33821	0.33281	0.463643	0.495198	0.24124	0.342303	0.293924	0.318795	0.232929	0.391282	0.210003	0.226121	0.259484	0.300604	0.223876	0.192134	0.474602	0.129937	0.247248	0.25988	0.184723	0.323251	0.422216	0.112432	0.256944	0.222442	0.241996	0.347775	0.245195	0.522594	0.202811	0.304311	0.292621	0.294671	0.108364	0.0169236		519.722	-0.0039966
		520.113	0.0850922	0.128707	0.285794	0.547034	0.359586	0.186668	0.43756	0.394948	0.299086	0.306378	0.434199	0.484909	0.232565	0.297239	0.30378	0.225549	0.209374	0.370193	0.200974	0.202868	0.246334	0.302535	0.213308	0.203168	0.47793	0.132311	0.238672	0.253435	0.190394	0.340158	0.441714	0.113113	0.234523	0.216733	0.222225	0.321222	0.246743	0.521078	0.173311	0.239178	0.290881	0.283207	0.111273	0.0173779		520.113	-0.00213767
		520.504	0.103944	0.155846	0.277973	0.555631	0.360343	0.195083	0.427097	0.353644	0.289618	0.294827	0.451006	0.486904	0.235279	0.31636	0.278289	0.245616	0.228571	0.444446	0.201562	0.176392	0.239748	0.28465	0.221709	0.210929	0.456957	0.127495	0.250411	0.210559	0.186893	0.338844	0.386319	0.109298	0.255187	0.207331	0.248224	0.319652	0.231988	0.498633	0.18245	0.231372	0.293558	0.282211	0.108162	0.0168921		520.504	0.000483879
		520.895	0.0903284	0.164718	0.27652	0.470951	0.355229	0.181792	0.446479	0.391458	0.337428	0.301691	0.44548	0.486008	0.224189	0.334983	0.283674	0.269004	0.200803	0.377839	0.184437	0.228613	0.257327	0.321497	0.240159	0.191339	0.476169	0.124465	0.253523	0.236996	0.164287	0.338571	0.367582	0.111463	0.259576	0.202015	0.216691	0.332203	0.224569	0.493204	0.180428	0.250743	0.293968	0.282644	0.10487	0.0163779		520.895	0.00859414
		521.286	0.0945829	0.166498	0.283406	0.52891	0.334926	0.177102	0.430967	0.364985	0.323904	0.302645	0.437111	0.486597	0.210093	0.31671	0.255136	0.262232	0.237532	0.371578	0.194877	0.208635	0.249708	0.277559	0.228261	0.200174	0.442863	0.132172	0.264335	0.253355	0.185148	0.347488	0.422103	0.10945	0.240009	0.19516	0.215251	0.340901	0.234562	0.489774	0.181132	0.238671	0.280788	0.28091	0.104614	0.016338		521.286	-0.00591985
		521.677	0.0955641	0.146605	0.281575	0.48174	0.36245	0.191638	0.414394	0.377497	0.321104	0.318844	0.439768	0.48333	0.208762	0.317299	0.263458	0.243954	0.220874	0.381032	0.203205	0.199263	0.251282	0.288472	0.211318	0.190279	0.429909	0.121005	0.267918	0.236891	0.17215	0.332789	0.405908	0.101063	0.245107	0.20663	0.230682	0.302683	0.251438	0.514933	0.187632	0.253423	0.286467	0.279033	0.103526	0.016168		521.677	-0.00582662
		522.068	0.0792284	0.164153	0.25448	0.449361	0.356197	0.165937	0.412285	0.404014	0.318333	0.30483	0.445114	0.477422	0.222356	0.301426	0.26931	0.288741	0.205184	0.371343	0.182059	0.204076	0.227857	0.273955	0.204977	0.199514	0.437713	0.114288	0.235831	0.2232	0.167702	0.297465	0.379935	0.103151	0.249237	0.191613	0.2188	0.320463	0.251829	0.473168	0.17951	0.213664	0.288104	0.27141	0.102016	0.0159322		522.068	0.00071777
		522.459	0.0925873	0.17246	0.267351	0.433841	0.351359	0.193914	0.39908	0.380255	0.267161	0.300381	0.4176	0.467014	0.221147	0.303825	0.275848	0.25986	0.21865	0.393123	0.177987	0.183648	0.240335	0.297142	0.194541	0.213696	0.438125	0.121918	0.252008	0.240353	0.167417	0.332705	0.367108	0.0954467	0.224124	0.208	0.239305	0.311656	0.232872	0.494748	0.173879	0.282662	0.27165	0.272604	0.0980115	0.0153068		522.459	-0.00281971
		522.85	0.0769956	0.120206	0.237224	0.450698	0.319979	0.196453	0.429258	0.356809	0.306741	0.300001	0.430095	0.463356	0.207939	0.325681	0.290024	0.236888	0.217347	0.382594	0.183915	0.192025	0.247525	0.246039	0.234204	0.194237	0.43976	0.11891	0.231194	0.221359	0.168161	0.35586	0.368701	0.105499	0.229551	0.189055	0.202355	0.299849	0.220243	0.479289	0.16559	0.231234	0.277807	0.267089	0.102063	0.0159396		522.85	0.00830797
		523.241	0.0879342	0.149605	0.269879	0.531302	0.326681	0.145565	0.408897	0.375514	0.284518	0.302293	0.43237	0.449462	0.219877	0.304284	0.278494	0.254472	0.188959	0.341401	0.163506	0.200163	0.246638	0.27575	0.191776	0.206316	0.427305	0.121817	0.230909	0.215644	0.154992	0.334858	0.329703	0.103406	0.226439	0.202793	0.228709	0.313641	0.23685	0.488731	0.181784	0.227753	0.272454	0.266669	0.103066	0.0160962		523.241	-0.00469443
		523.632	0.0871684	0.155441	0.256319	0.519728	0.362892	0.191758	0.400025	0.376335	0.29626	0.279909	0.460835	0.462086	0.21289	0.295793	0.279335	0.266989	0.216627	0.387933	0.178329	0.207787	0.231268	0.2775	0.211106	0.177984	0.410924	0.119351	0.223582	0.234201	0.158943	0.323605	0.391743	0.103974	0.230731	0.197155	0.219514	0.315781	0.24091	0.482764	0.158369	0.217814	0.262393	0.270343	0.104665	0.0163459		523.632	-0.00257513
		524.024	0.0739369	0.130223	0.243825	0.523817	0.335605	0.15725	0.382151	0.357256	0.288838	0.277261	0.407131	0.465555	0.212113	0.291134	0.288468	0.208598	0.218764	0.355115	0.171687	0.197877	0.235389	0.296378	0.198905	0.192899	0.416554	0.11726	0.242887	0.226348	0.187536	0.317922	0.347181	0.0953449	0.219964	0.197241	0.200779	0.308057	0.224385	0.467838	0.179976	0.220253	0.266844	0.262111	0.101163	0.0157989		524.024	0.0012009
		524.415	0.0772474	0.14608	0.249389	0.510297	0.317969	0.186667	0.416575	0.366756	0.278912	0.275032	0.439712	0.448974	0.216132	0.278045	0.271245	0.20427	0.172066	0.357999	0.165698	0.198385	0.224655	0.284316	0.211741	0.172838	0.403677	0.110461	0.252837	0.221636	0.170553	0.302612	0.338827	0.0994716	0.222536	0.194501	0.189705	0.298246	0.227237	0.490755	0.166666	0.221471	0.271705	0.259851	0.102735	0.0160445		524.415	-0.00185947
		524.806	0.0780515	0.141315	0.238804	0.453393	0.324668	0.174168	0.399565	0.355722	0.284286	0.27678	0.423672	0.437927	0.208038	0.286051	0.265267	0.272444	0.193409	0.327933	0.164373	0.184071	0.227212	0.243442	0.201014	0.184899	0.417022	0.115413	0.246448	0.224744	0.155296	0.338372	0.349306	0.0968549	0.218839	0.200307	0.20586	0.289913	0.228764	0.460671	0.164579	0.248212	0.25955	0.257723	0.0963458	0.0150467		524.806	0.00311465
		525.197	0.0763583	0.149002	0.243399	0.429665	0.323954	0.172642	0.370647	0.337492	0.28262	0.287587	0.429401	0.432469	0.209594	0.270915	0.264479	0.219775	0.197181	0.367632	0.182895	0.193871	0.238595	0.289575	0.182059	0.168685	0.405537	0.106251	0.241059	0.241527	0.172921	0.332555	0.339943	0.0936933	0.249855	0.193059	0.226064	0.289181	0.238414	0.45658	0.158345	0.244897	0.268146	0.258013	0.0936082	0.0146192		525.197	-0.00263464
		525.588	0.0700761	0.14053	0.25048	0.462281	0.318137	0.164728	0.393832	0.380715	0.267789	0.268561	0.399049	0.43378	0.190757	0.277022	0.266869	0.223567	0.203836	0.347725	0.164138	0.189309	0.198611	0.285289	0.195	0.179059	0.411707	0.110047	0.242332	0.195345	0.140632	0.320551	0.325431	0.0938498	0.222237	0.179267	0.172082	0.292424	0.219328	0.474022	0.168471	0.235228	0.253699	0.251897	0.0991377	0.0154827		525.588	0.0105412
		525.979	0.0925877	0.144418	0.235318	0.439578	0.328778	0.163739	0.403366	0.358913	0.285149	0.26716	0.383864	0.440658	0.20013	0.312725	0.271388	0.238099	0.200396	0.392653	0.160382	0.190822	0.223307	0.29347	0.19028	0.186863	0.395226	0.107589	0.213968	0.217657	0.153194	0.329814	0.333053	0.0921	0.209704	0.184385	0.18145	0.290642	0.230777	0.461349	0.154386	0.239223	0.255187	0.254969	0.0969422	0.0151398		525.979	-1.13357e-05
		526.37	0.0770451	0.15721	0.225477	0.451948	0.291115	0.156013	0.378484	0.315087	0.277367	0.259862	0.413289	0.419153	0.191933	0.284155	0.231909	0.233838	0.199396	0.351588	0.164215	0.207792	0.205011	0.258533	0.176939	0.180131	0.403812	0.101355	0.228857	0.218742	0.141763	0.305581	0.306583	0.0973982	0.215119	0.18039	0.178283	0.300798	0.229365	0.474537	0.16555	0.252368	0.255119	0.247881	0.0945906	0.0147726		526.37	-0.00039006
		526.761	0.0739496	0.144012	0.222656	0.451113	0.279547	0.169855	0.362213	0.325874	0.284213	0.24761	0.385407	0.420121	0.199135	0.269182	0.260463	0.191595	0.189937	0.355539	0.161364	0.190346	0.234927	0.257081	0.158919	0.170587	0.376935	0.107069	0.215759	0.213364	0.140017	0.276748	0.329101	0.0880724	0.231635	0.174939	0.203135	0.260899	0.222698	0.445665	0.166134	0.236821	0.251971	0.2426	0.0912866	0.0142566		526.761	-0.000352302
		527.152	0.0813004	0.127299	0.242246	0.414928	0.305277	0.166812	0.362363	0.333029	0.255489	0.26566	0.389845	0.409406	0.203028	0.281608	0.240925	0.209977	0.185297	0.343924	0.161673	0.168062	0.211494	0.261412	0.201926	0.165333	0.387503	0.108666	0.217177	0.211675	0.119844	0.316815	0.303791	0.0895672	0.212266	0.178587	0.202702	0.27082	0.208025	0.460683	0.16297	0.245509	0.24143	0.242106	0.0911902	0.0142415		527.152	0.00984498
		527.543	0.107072	0.148197	0.219182	0.417745	0.310196	0.167546	0.363529	0.298744	0.257665	0.249518	0.387983	0.406932	0.196615	0.288904	0.276811	0.229453	0.174433	0.326562	0.15313	0.185377	0.212222	0.254907	0.18279	0.162758	0.355399	0.104162	0.219538	0.202228	0.152498	0.300752	0.277625	0.0922128	0.214405	0.180736	0.196592	0.277356	0.203446	0.436803	0.150047	0.232209	0.23377	0.239221	0.0854506	0.0133451		527.543	-0.00607188
		527.934	0.0876763	0.133502	0.230431	0.422319	0.283848	0.131375	0.358429	0.298825	0.25107	0.250785	0.386036	0.407167	0.194385	0.261165	0.26601	0.208826	0.187487	0.335184	0.159975	0.15594	0.217836	0.239384	0.17047	0.172057	0.375455	0.0930254	0.219927	0.185283	0.141387	0.30945	0.330673	0.0930834	0.214226	0.163504	0.19284	0.277067	0.215183	0.457657	0.14484	0.191113	0.238818	0.235457	0.0916524	0.0143137		527.934	0.00235085
		528.325	0.0781616	0.100924	0.236714	0.435178	0.298971	0.153605	0.344607	0.278035	0.273395	0.25971	0.37711	0.377214	0.175417	0.286657	0.216141	0.196333	0.182322	0.280757	0.149775	0.176797	0.212682	0.274765	0.177194	0.166169	0.353426	0.103575	0.21918	0.198734	0.134934	0.292815	0.290952	0.0910349	0.206838	0.172186	0.180337	0.277756	0.196809	0.436402	0.153083	0.195723	0.24538	0.230678	0.087336	0.0136396		528.325	0.00216138
		528.716	0.0703679	0.150771	0.228306	0.435619	0.303941	0.161484	0.338283	0.333431	0.267922	0.240504	0.382691	0.40135	0.182957	0.268858	0.214322	0.222356	0.168807	0.344621	0.163601	0.17484	0.224644	0.245611	0.171783	0.175344	0.359316	0.0986042	0.200278	0.187951	0.153955	0.266954	0.290368	0.0853026	0.210588	0.173855	0.195248	0.251277	0.203339	0.419866	0.148376	0.215613	0.242313	0.233552	0.0873294	0.0136386		528.716	0.00351217
		529.108	0.0961902	0.129839	0.232507	0.43817	0.292207	0.136502	0.335158	0.240606	0.273009	0.254313	0.383459	0.384235	0.182861	0.233948	0.216181	0.167758	0.169212	0.307586	0.15914	0.17268	0.224763	0.261192	0.179565	0.177418	0.347301	0.108189	0.194157	0.18373	0.142019	0.275084	0.304083	0.0898591	0.205992	0.181287	0.167386	0.269371	0.209468	0.439895	0.152308	0.218172	0.227205	0.22839	0.0857352	0.0133896		529.108	0.00464101
		529.499	0.0739958	0.131836	0.226521	0.420279	0.299547	0.130022	0.331149	0.312181	0.234087	0.239156	0.369175	0.380842	0.182823	0.258458	0.246943	0.188168	0.163636	0.341201	0.152828	0.147841	0.18689	0.22356	0.17409	0.135994	0.344845	0.0985388	0.200307	0.209181	0.146817	0.263024	0.320024	0.0864174	0.178815	0.168476	0.17587	0.279396	0.222987	0.429626	0.133287	0.213811	0.23473	0.22579	0.0885859	0.0138348		529.499	0.0140622
		529.89	0.0866301	0.10728	0.201913	0.388691	0.284988	0.1149	0.333608	0.28068	0.243241	0.254726	0.387096	0.382879	0.178656	0.255293	0.222267	0.194358	0.174817	0.316816	0.161633	0.164977	0.190688	0.249387	0.171688	0.155769	0.349266	0.0968208	0.186886	0.197029	0.133482	0.285812	0.292664	0.0884753	0.196838	0.164681	0.195671	0.23091	0.182916	0.40013	0.141913	0.22423	0.22486	0.221843	0.0839589	0.0131122		529.89	0.00105821
		530.281	0.0842927	0.120756	0.220784	0.451743	0.296813	0.161484	0.339408	0.26432	0.266277	0.242791	0.368798	0.385282	0.179587	0.283884	0.248628	0.202862	0.169268	0.348336	0.149711	0.156294	0.194708	0.252284	0.177509	0.156853	0.328324	0.0943558	0.194414	0.187757	0.14202	0.262733	0.26829	0.0799933	0.180781	0.145152	0.180654	0.255732	0.188067	0.440929	0.142796	0.197834	0.232594	0.22549	0.0891981	0.0139304		530.281	0.0102014
		530.672	0.0804347	0.0998165	0.231217	0.427701	0.28886	0.121181	0.327959	0.29464	0.233466	0.245839	0.363204	0.345877	0.175785	0.239862	0.234324	0.246446	0.172053	0.320693	0.129055	0.139708	0.20657	0.251736	0.173278	0.162922	0.33949	0.0915897	0.183738	0.19402	0.128738	0.292491	0.250014	0.0830978	0.196397	0.167039	0.185508	0.255822	0.172386	0.405725	0.127233	0.187905	0.234485	0.219715	0.0857652	0.0133943		530.672	0.00435192
		531.063	0.0704616	0.100009	0.218837	0.385284	0.282905	0.158056	0.347756	0.238923	0.2457	0.230274	0.357138	0.382121	0.176237	0.247682	0.211038	0.192368	0.155939	0.294881	0.157208	0.151716	0.191044	0.259111	0.177303	0.159971	0.323172	0.103479	0.20153	0.164383	0.111358	0.281281	0.289661	0.0812121	0.205863	0.15367	0.170356	0.242314	0.20129	0.404001	0.138453	0.219363	0.221932	0.217202	0.0825622	0.012894		531.063	-0.0055554
		531.454	0.0714086	0.0848807	0.194587	0.36986	0.283298	0.132464	0.323876	0.25087	0.241307	0.236581	0.358007	0.368445	0.172252	0.265455	0.222077	0.165081	0.164437	0.278167	0.145762	0.150163	0.192562	0.266545	0.170501	0.156283	0.34394	0.0933399	0.167279	0.183519	0.132359	0.2869	0.290663	0.0883386	0.166796	0.150982	0.19527	0.2654	0.193788	0.394414	0.139858	0.226804	0.220099	0.214747	0.082496	0.0128837		531.454	0.00867304
		531.845	0.0686629	0.123946	0.205442	0.405925	0.266886	0.143603	0.320209	0.268365	0.239447	0.218193	0.341254	0.367421	0.179577	0.255358	0.225435	0.172045	0.167216	0.310575	0.135737	0.142126	0.192767	0.214683	0.168241	0.160579	0.309433	0.0903351	0.194348	0.172571	0.120639	0.268669	0.292888	0.0823804	0.1977	0.151368	0.175083	0.24138	0.188195	0.407629	0.142815	0.199801	0.211215	0.213174	0.0816197	0.0127469		531.845	-0.00189098
		532.236	0.0774156	0.120918	0.204851	0.39352	0.254042	0.145288	0.310823	0.2379	0.224858	0.213967	0.349303	0.366358	0.179993	0.25509	0.192628	0.181712	0.165341	0.328083	0.141024	0.141475	0.186171	0.211795	0.158499	0.160577	0.310057	0.0911652	0.191068	0.181862	0.128775	0.268244	0.25747	0.0812999	0.184369	0.141968	0.156937	0.250668	0.186397	0.407386	0.135568	0.209611	0.209685	0.209614	0.0803	0.0125408		532.236	-0.00767912
		532.627	0.0704653	0.106605	0.178553	0.420017	0.249387	0.110394	0.339636	0.304351	0.231323	0.221078	0.339622	0.356318	0.178824	0.248445	0.224165	0.152053	0.155855	0.314657	0.159251	0.141796	0.185692	0.200481	0.157001	0.156755	0.325941	0.0886049	0.183275	0.162822	0.123257	0.276626	0.2945	0.0702638	0.156597	0.158562	0.167865	0.23342	0.184637	0.388	0.127721	0.198245	0.216792	0.208777	0.0857479	0.0133916		532.627	-0.00197261
		533.018	0.066865	0.0978392	0.199714	0.345529	0.278814	0.121851	0.321909	0.255608	0.232215	0.234983	0.34972	0.354896	0.170694	0.257378	0.215182	0.132272	0.152264	0.297353	0.136521	0.160343	0.172183	0.260655	0.155124	0.156045	0.318442	0.0918953	0.18148	0.169869	0.125275	0.259517	0.261642	0.075621	0.16909	0.147637	0.14909	0.237594	0.202672	0.396353	0.12276	0.20024	0.210421	0.205989	0.081036	0.0126557		533.018	0.00437753
		533.409	0.0838585	0.108673	0.190136	0.39225	0.282613	0.127874	0.313139	0.253822	0.218461	0.227791	0.337231	0.366015	0.157854	0.238877	0.227755	0.190468	0.146744	0.299004	0.142723	0.143941	0.184471	0.211038	0.156238	0.156336	0.311346	0.0796125	0.179699	0.176567	0.11443	0.242626	0.271448	0.0773272	0.201537	0.161707	0.166297	0.264575	0.192496	0.36685	0.126762	0.187649	0.203819	0.20688	0.0791599	0.0123627		533.409	0.00687565
		533.801	0.0782976	0.124554	0.191599	0.369661	0.278096	0.14406	0.320634	0.251762	0.224671	0.216957	0.324252	0.339232	0.157481	0.229091	0.185453	0.170426	0.140711	0.268383	0.126143	0.151579	0.197716	0.244004	0.163223	0.146913	0.300538	0.0832823	0.184876	0.154978	0.11642	0.250459	0.321406	0.0658485	0.209112	0.145808	0.184243	0.23875	0.183855	0.354074	0.132681	0.2069	0.202645	0.204409	0.0762211	0.0119037		533.801	0.0152022
		534.192	0.0828384	0.118508	0.20685	0.389844	0.250675	0.13124	0.314593	0.221673	0.231878	0.198336	0.349064	0.35285	0.166718	0.23312	0.202139	0.145014	0.143238	0.288549	0.128095	0.122202	0.186053	0.228615	0.178327	0.143439	0.283674	0.0852062	0.181392	0.174458	0.113845	0.254011	0.275187	0.0815772	0.17405	0.146708	0.153959	0.228721	0.173813	0.393826	0.123691	0.191677	0.206414	0.201368	0.0793141	0.0123868		534.192	0.00598699
		534.583	0.0684256	0.0840024	0.195072	0.352463	0.260039	0.135555	0.311706	0.249536	0.225259	0.21093	0.314135	0.356558	0.16718	0.24012	0.235366	0.179703	0.151867	0.266473	0.134691	0.150181	0.172108	0.210912	0.163626	0.135351	0.303353	0.0860233	0.176275	0.163001	0.118264	0.245377	0.292299	0.0757895	0.166434	0.152351	0.178572	0.230311	0.182533	0.396727	0.116948	0.181653	0.193391	0.200745	0.0778649	0.0121605		534.583	0.0131446
		534.974	0.0729635	0.107733	0.1795	0.339192	0.231961	0.142218	0.284352	0.231453	0.212804	0.22359	0.330448	0.344538	0.161649	0.241685	0.224248	0.15707	0.142368	0.303501	0.121425	0.123553	0.159162	0.219739	0.135891	0.148202	0.296436	0.0746182	0.180933	0.153715	0.0956939	0.274777	0.255679	0.0730153	0.17371	0.141093	0.143972	0.225365	0.165294	0.387531	0.128633	0.207133	0.193961	0.195385	0.0777626	0.0121445		534.974	0.00282977
		535.365	0.076576	0.12543	0.176853	0.355193	0.241301	0.132719	0.304728	0.236966	0.214637	0.211263	0.327709	0.332487	0.165201	0.210019	0.210779	0.137661	0.153668	0.245249	0.1206	0.145459	0.171926	0.229097	0.137995	0.138961	0.278478	0.0803833	0.175005	0.150265	0.112411	0.23634	0.26992	0.0732802	0.172915	0.143413	0.149462	0.20702	0.167574	0.358323	0.119984	0.158433	0.199907	0.1916	0.0728472	0.0113768		535.365	0.0153098
		535.756	0.0509238	0.114436	0.199053	0.382483	0.246652	0.127462	0.30177	0.218515	0.219193	0.216011	0.32474	0.328779	0.15095	0.221419	0.193436	0.125283	0.136017	0.285581	0.138143	0.150353	0.184271	0.209824	0.1353	0.142442	0.301648	0.0755372	0.168433	0.158295	0.114277	0.236074	0.241748	0.0714771	0.187115	0.141117	0.138864	0.228414	0.162501	0.377006	0.115388	0.186124	0.183912	0.192463	0.0780027	0.012182		535.756	0.00286821
		536.147	0.0637339	0.0891117	0.191506	0.347189	0.239843	0.112833	0.300888	0.219983	0.201219	0.213456	0.334374	0.339502	0.159261	0.238521	0.226727	0.190544	0.149329	0.261058	0.10625	0.1312	0.187245	0.196604	0.155544	0.131098	0.278432	0.0850082	0.184385	0.158488	0.118516	0.234729	0.240247	0.0739232	0.191539	0.140525	0.16936	0.22423	0.178044	0.364604	0.117796	0.195543	0.197389	0.193653	0.0741248	0.0115764		536.147	0.00611772
		536.538	0.0759649	0.0960969	0.182794	0.355781	0.222701	0.115712	0.27304	0.220944	0.212717	0.209669	0.312741	0.321792	0.156065	0.244564	0.199906	0.108802	0.142776	0.284934	0.118489	0.119776	0.170298	0.213823	0.146742	0.136517	0.269423	0.0711485	0.160113	0.152626	0.117121	0.231548	0.254119	0.0677646	0.170783	0.135037	0.159311	0.203845	0.164568	0.372194	0.116316	0.170704	0.191039	0.186593	0.0744798	0.0116318		536.538	0.0195517
		536.929	0.0593028	0.0778437	0.179687	0.345184	0.227645	0.122995	0.286542	0.231874	0.191413	0.208462	0.294781	0.323818	0.144223	0.203585	0.190328	0.153267	0.133867	0.257186	0.117427	0.14065	0.15714	0.205368	0.135788	0.135668	0.254565	0.077336	0.162777	0.149079	0.110888	0.231628	0.250511	0.0697482	0.159454	0.136169	0.15483	0.216144	0.159935	0.366416	0.114032	0.174313	0.190871	0.182994	0.072151	0.0112681		536.929	0.00850183
		537.32	0.0684326	0.0875915	0.173817	0.360748	0.241254	0.120434	0.267275	0.204997	0.194142	0.186108	0.292645	0.324709	0.154223	0.195026	0.215046	0.156644	0.135152	0.259485	0.10181	0.140411	0.162047	0.197181	0.13253	0.13491	0.276652	0.0800969	0.180023	0.156358	0.104476	0.22537	0.256308	0.0650899	0.151664	0.14498	0.130113	0.204957	0.16881	0.371827	0.120078	0.173597	0.194582	0.18321	0.0730582	0.0114098		537.32	0.00635394
		537.711	0.0600604	0.104604	0.184772	0.353274	0.218448	0.119791	0.278404	0.193761	0.205369	0.205046	0.293486	0.329762	0.15135	0.208688	0.167566	0.141836	0.133259	0.246967	0.117607	0.110459	0.139738	0.194786	0.123522	0.122148	0.262899	0.074417	0.154425	0.147066	0.106344	0.228989	0.243292	0.065885	0.156289	0.136469	0.148071	0.203017	0.163297	0.319009	0.117376	0.163807	0.180395	0.177457	0.0699897	0.0109306		537.711	0.00182902
		538.102	0.0707885	0.110579	0.163685	0.363032	0.220743	0.109722	0.280339	0.196588	0.189058	0.198453	0.305744	0.313691	0.140215	0.207565	0.209413	0.136219	0.138241	0.255859	0.108378	0.117953	0.165692	0.199932	0.126881	0.125298	0.26515	0.0830413	0.156774	0.14625	0.0756681	0.240823	0.231133	0.0717373	0.154815	0.135415	0.143973	0.1989	0.17161	0.341004	0.107177	0.179028	0.183358	0.179023	0.0719718	0.0112401		538.102	0.0103423
		538.493	0.0563953	0.0885892	0.170404	0.277362	0.240745	0.130966	0.263702	0.183337	0.197738	0.211213	0.284068	0.287369	0.144174	0.186393	0.168782	0.147144	0.128761	0.250898	0.111703	0.124221	0.162518	0.190018	0.144547	0.115248	0.273565	0.0732297	0.156031	0.134709	0.100316	0.236567	0.207324	0.06661	0.147026	0.132264	0.140469	0.213189	0.160872	0.341365	0.108887	0.161351	0.178374	0.173133	0.0654477	0.0102212		538.493	0.00385798
		538.885	0.0645159	0.0971396	0.154968	0.320502	0.217043	0.116772	0.265456	0.182322	0.197033	0.202333	0.279554	0.291151	0.146095	0.211725	0.187095	0.109186	0.117629	0.292312	0.105516	0.111139	0.137024	0.168532	0.141401	0.130006	0.24798	0.0698481	0.148731	0.145323	0.111996	0.232658	0.243186	0.0667157	0.152249	0.141697	0.138349	0.186334	0.162539	0.335246	0.114224	0.166004	0.172237	0.172726	0.0681238	0.0106391		538.885	0.0122294
		539.276	0.0648439	0.0880686	0.166174	0.320099	0.219758	0.12305	0.274847	0.16592	0.184039	0.198473	0.301642	0.307413	0.137924	0.202112	0.176425	0.126553	0.115074	0.256048	0.113228	0.117376	0.151491	0.215953	0.137045	0.12021	0.253164	0.0754872	0.155604	0.136326	0.087848	0.225577	0.228503	0.0727151	0.177649	0.13318	0.13853	0.202125	0.149281	0.332113	0.104678	0.167408	0.17434	0.173129	0.0687162	0.0107317		539.276	0.00676327
		539.667	0.0527642	0.0961949	0.1725	0.321289	0.218617	0.112173	0.280264	0.200826	0.192138	0.181941	0.274766	0.301499	0.133955	0.200387	0.192159	0.138535	0.117773	0.250374	0.115073	0.113345	0.144564	0.177339	0.127253	0.11491	0.260146	0.0768443	0.169052	0.141174	0.0975325	0.234163	0.216824	0.0642162	0.160267	0.119478	0.119958	0.180129	0.145393	0.332021	0.109263	0.163367	0.179259	0.170725	0.0682139	0.0106532		539.667	0.00947003
		540.058	0.063081	0.0687492	0.167538	0.329229	0.21461	0.111925	0.246088	0.193626	0.174297	0.175237	0.261899	0.296128	0.134675	0.190045	0.195858	0.144386	0.117567	0.240113	0.109667	0.123431	0.153827	0.195345	0.133073	0.11564	0.268062	0.0785164	0.15389	0.127889	0.125179	0.244394	0.210096	0.0670671	0.169339	0.123662	0.121309	0.199335	0.145741	0.346799	0.109239	0.190337	0.163372	0.170738	0.0673435	0.0105173		540.058	0.00682069
		540.449	0.0571484	0.112396	0.164617	0.306106	0.20019	0.129388	0.249468	0.211163	0.180202	0.17801	0.272714	0.294251	0.127851	0.1878	0.15847	0.142404	0.12176	0.256156	0.107842	0.113737	0.145012	0.181432	0.143028	0.111823	0.253997	0.0699643	0.144176	0.113455	0.0957536	0.216768	0.179954	0.0630924	0.153105	0.124312	0.132857	0.202136	0.154801	0.330742	0.0993944	0.170112	0.164873	0.166401	0.0646678	0.0100994		540.449	0.00386062
		540.84	0.0713495	0.0983153	0.160735	0.311091	0.219307	0.0942317	0.254064	0.166653	0.194852	0.171086	0.300982	0.276992	0.132986	0.191285	0.187785	0.075381	0.137037	0.266159	0.0997605	0.115455	0.152332	0.180858	0.121212	0.107357	0.238322	0.0710159	0.152132	0.133608	0.0893531	0.188394	0.188396	0.060585	0.13348	0.12492	0.119989	0.194878	0.144823	0.3222	0.0939266	0.165292	0.15896	0.162623	0.0671094	0.0104807		540.84	0.0136253
		541.231	0.0488178	0.0871454	0.152023	0.311617	0.233819	0.0872244	0.243151	0.187493	0.183517	0.188888	0.27505	0.281885	0.131948	0.198153	0.189555	0.0974706	0.109914	0.224025	0.0917456	0.115658	0.142641	0.16212	0.12709	0.128986	0.229692	0.0728176	0.159816	0.123092	0.0898186	0.191767	0.181414	0.0611868	0.135704	0.117643	0.128603	0.186277	0.144875	0.321923	0.106442	0.155673	0.161873	0.160209	0.0652575	0.0101915		541.231	0.0122134
		541.622	0.0644799	0.110692	0.1642	0.275855	0.197719	0.115961	0.232544	0.18941	0.19688	0.167758	0.279	0.290292	0.139988	0.189173	0.166374	0.104801	0.122772	0.24888	0.095113	0.103421	0.129343	0.164246	0.128521	0.108952	0.243379	0.0589149	0.149609	0.118985	0.0858523	0.200183	0.240816	0.0603133	0.132525	0.121681	0.12371	0.191185	0.147108	0.305463	0.101517	0.16312	0.163006	0.160823	0.0633273	0.00989007		541.622	0.0115335
		542.013	0.0606053	0.106912	0.154424	0.309124	0.190685	0.10762	0.262115	0.164227	0.172028	0.174289	0.248916	0.278338	0.131272	0.203897	0.185721	0.1135	0.104722	0.220928	0.103559	0.10194	0.142788	0.161716	0.13195	0.10757	0.236619	0.068182	0.142815	0.127033	0.0840259	0.17112	0.206615	0.05811	0.13922	0.110867	0.125563	0.183131	0.149935	0.302828	0.11229	0.162376	0.155841	0.157937	0.0615684	0.00961538		542.013	0.0124922
		542.404	0.0672637	0.0624339	0.145765	0.35092	0.199006	0.100679	0.243467	0.173688	0.187586	0.152847	0.259331	0.279745	0.130288	0.170163	0.175938	0.108054	0.118493	0.21264	0.10367	0.126505	0.139785	0.157045	0.12323	0.106503	0.216616	0.0648535	0.137156	0.123271	0.0850229	0.209877	0.182926	0.0621165	0.143479	0.108778	0.119397	0.176313	0.140684	0.311009	0.0939288	0.158314	0.156432	0.155737	0.0650164	0.0101539		542.404	0.0192618
		542.795	0.0635829	0.0838671	0.162393	0.315018	0.194923	0.103889	0.247903	0.169606	0.18163	0.167901	0.26934	0.276887	0.123284	0.180728	0.168359	0.128957	0.121036	0.239364	0.0997596	0.121669	0.131011	0.14978	0.141736	0.109574	0.231478	0.0694313	0.139785	0.119398	0.0856831	0.175503	0.179472	0.0631196	0.132918	0.119329	0.118859	0.189956	0.151661	0.30016	0.0876683	0.14598	0.162579	0.156712	0.0619977	0.00968242		542.795	0.0164267
		543.186	0.0467118	0.0983541	0.155124	0.294536	0.213679	0.101091	0.242568	0.147082	0.162721	0.167604	0.261046	0.276241	0.127872	0.166653	0.193092	0.0906545	0.10286	0.219407	0.0974464	0.117067	0.142887	0.136965	0.0991609	0.10508	0.233636	0.0713561	0.135507	0.135918	0.0796533	0.187776	0.186678	0.0587951	0.127034	0.11994	0.125803	0.165787	0.12836	0.302351	0.0902714	0.143356	0.152508	0.151479	0.0622685	0.00972471		543.186	0.0112177
		543.578	0.0555308	0.100176	0.144295	0.309567	0.203763	0.100673	0.237252	0.151727	0.172926	0.166133	0.259258	0.257547	0.129055	0.170304	0.178449	0.113814	0.109624	0.241855	0.0993156	0.105388	0.128001	0.164613	0.126365	0.121449	0.229117	0.0604104	0.13383	0.110828	0.100863	0.206099	0.189606	0.0604922	0.125615	0.11586	0.125331	0.184375	0.138582	0.28826	0.0975144	0.167568	0.153887	0.15452	0.0604977	0.00944815		543.578	0.00691738
		543.969	0.0453344	0.0815291	0.156273	0.267124	0.210514	0.103561	0.229673	0.186135	0.161579	0.162526	0.267274	0.252923	0.12398	0.165309	0.163391	0.103824	0.123594	0.229578	0.0948202	0.0999624	0.132601	0.140119	0.12474	0.112636	0.227566	0.056589	0.134733	0.116648	0.0997056	0.216727	0.202511	0.0552537	0.136913	0.116662	0.103894	0.180749	0.121404	0.313585	0.0981974	0.158335	0.158931	0.152132	0.0615109	0.0096064		543.969	0.0112625
		544.36	0.0495563	0.0730537	0.140806	0.248232	0.188302	0.108125	0.212196	0.166546	0.169908	0.163649	0.253361	0.269179	0.127999	0.187412	0.165412	0.0919787	0.0920659	0.207733	0.0840511	0.0996534	0.131459	0.161144	0.124941	0.110047	0.209912	0.058471	0.126104	0.102263	0.0794212	0.159798	0.178464	0.0554887	0.131873	0.107374	0.115748	0.177215	0.124345	0.280075	0.0847611	0.145867	0.143848	0.144094	0.0572722	0.00894442		544.36	0.0154628
		544.751	0.0651083	0.0970854	0.144134	0.283872	0.185348	0.0832205	0.23097	0.163283	0.162289	0.166173	0.243245	0.254174	0.127719	0.159189	0.165737	0.0940413	0.0978361	0.226375	0.095671	0.104961	0.127705	0.147725	0.131052	0.109477	0.193436	0.0591359	0.139556	0.111425	0.0805643	0.171823	0.15854	0.0566742	0.125316	0.103469	0.111158	0.181215	0.157182	0.27498	0.0907654	0.129023	0.154246	0.145485	0.0563615	0.0088022		544.751	0.0114566
		545.142	0.0502492	0.0925006	0.126993	0.251201	0.20129	0.108347	0.246088	0.161655	0.159824	0.145837	0.241663	0.254654	0.119736	0.16729	0.185405	0.0903975	0.101262	0.214182	0.0959003	0.0996748	0.116463	0.178994	0.109857	0.097752	0.219598	0.0538857	0.135929	0.109507	0.0663386	0.192025	0.179313	0.0540799	0.136883	0.106296	0.106873	0.179413	0.134722	0.277066	0.0795002	0.152862	0.142936	0.144986	0.0587347	0.00917283		545.142	0.0172617
		545.533	0.047886	0.0812053	0.13442	0.263663	0.182012	0.110712	0.221644	0.136577	0.168141	0.150458	0.233566	0.248995	0.123093	0.175485	0.153602	0.0834931	0.0952925	0.192695	0.0814324	0.0910491	0.143139	0.159628	0.112157	0.112646	0.212203	0.0618072	0.132398	0.107905	0.091963	0.158477	0.157306	0.054583	0.123097	0.117348	0.108025	0.170957	0.147563	0.280267	0.0865588	0.142322	0.133822	0.14121	0.0548959	0.00857331		545.533	0.00583595
		545.924	0.0577785	0.0853879	0.131419	0.232355	0.187955	0.0894373	0.225131	0.121533	0.16902	0.156194	0.238861	0.252334	0.108996	0.159581	0.155162	0.0929475	0.112247	0.159604	0.0935271	0.089903	0.125961	0.148325	0.0946757	0.104158	0.211771	0.0575122	0.123791	0.11266	0.0655188	0.168923	0.135949	0.0538324	0.128373	0.104738	0.124157	0.169643	0.1407	0.286021	0.0767888	0.134086	0.145409	0.137375	0.0545277	0.00851579		545.924	0.0205206
		546.315	0.05182	0.0709501	0.149023	0.2791	0.183352	0.0837576	0.210452	0.129314	0.159128	0.155696	0.223254	0.254537	0.115377	0.161012	0.158637	0.0981677	0.100826	0.200058	0.0922051	0.0905606	0.131289	0.147377	0.10465	0.092567	0.195027	0.0566258	0.130814	0.105697	0.0754819	0.162444	0.19278	0.0545771	0.1121	0.106561	0.10951	0.158623	0.133515	0.269942	0.0796666	0.133701	0.139185	0.138033	0.056095	0.00876057		546.315	0.0135265
		546.706	0.0380521	0.0647182	0.140173	0.251982	0.170311	0.093836	0.207684	0.132886	0.155839	0.155551	0.23304	0.240502	0.107568	0.151467	0.162504	0.115641	0.0934023	0.208489	0.08147	0.0966003	0.127399	0.134784	0.10765	0.0829555	0.198166	0.0494431	0.119001	0.0987764	0.0774215	0.165322	0.153689	0.0539505	0.123075	0.0973904	0.0884229	0.15943	0.121662	0.263103	0.070009	0.151386	0.141163	0.133803	0.0550902	0.00860364		546.706	0.0284941
		547.097	0.0488205	0.0663918	0.127137	0.287106	0.165764	0.0932048	0.209557	0.121673	0.148582	0.148137	0.229289	0.228943	0.105747	0.174987	0.124822	0.0681508	0.107509	0.186441	0.0736553	0.0813184	0.125546	0.133303	0.112055	0.0984209	0.197143	0.0511049	0.129042	0.0926245	0.080153	0.198439	0.155202	0.0530603	0.119426	0.104556	0.0879537	0.161976	0.123873	0.270987	0.0890757	0.120853	0.140274	0.132739	0.0568708	0.00888173		547.097	0.0233351
		547.488	0.057947	0.0768057	0.140859	0.25914	0.191786	0.0906719	0.221363	0.182604	0.14066	0.149934	0.234214	0.238421	0.111377	0.165444	0.141126	0.0887703	0.0953507	0.18596	0.0872675	0.0798593	0.109516	0.137581	0.109248	0.0834493	0.187808	0.0563725	0.141118	0.0978124	0.0616551	0.174297	0.169979	0.0539036	0.125419	0.0970424	0.0919555	0.150125	0.130057	0.264895	0.0782375	0.136353	0.139217	0.135015	0.0555395	0.00867382		547.488	0.031934
		547.879	0.043714	0.0743681	0.126642	0.254118	0.159196	0.0843244	0.209283	0.150188	0.148062	0.14753	0.237268	0.239462	0.110868	0.163292	0.129304	0.0660166	0.0949706	0.159493	0.0709898	0.0895402	0.126011	0.142676	0.103513	0.0920979	0.172924	0.0545307	0.110403	0.104507	0.0576085	0.169101	0.172222	0.0521265	0.136272	0.0970001	0.0875798	0.164313	0.130944	0.23555	0.0709101	0.123595	0.139719	0.129323	0.0533863	0.00833754		547.879	0.0319952
		548.27	0.0481702	0.0722498	0.128639	0.25694	0.169608	0.102888	0.22078	0.127952	0.133613	0.149232	0.21788	0.233951	0.112811	0.135258	0.161288	0.0578622	0.10657	0.1999	0.0940585	0.0733172	0.125444	0.153939	0.100552	0.0768712	0.178778	0.0522838	0.135681	0.098266	0.0705422	0.189925	0.165139	0.0465603	0.130363	0.102713	0.109312	0.147554	0.125485	0.254223	0.0844931	0.134053	0.135334	0.132207	0.0540928	0.00844787		548.27	0.0305278
		548.662	0.0459569	0.0655626	0.116562	0.248509	0.177691	0.0811623	0.216331	0.125804	0.152168	0.134484	0.23218	0.242666	0.100405	0.176028	0.150726	0.074722	0.104994	0.191515	0.0715922	0.0880083	0.11045	0.172235	0.0958803	0.0816655	0.192977	0.0525682	0.125226	0.101084	0.0656515	0.178161	0.127332	0.0447368	0.112381	0.0944992	0.111712	0.157383	0.121131	0.263664	0.0691512	0.134623	0.130611	0.130249	0.0567034	0.00885559		548.662	0.0265966
		549.053	0.0481879	0.0740086	0.123306	0.23605	0.169615	0.0873339	0.192443	0.141826	0.146062	0.125097	0.213099	0.220622	0.10584	0.141913	0.146415	0.0921531	0.094645	0.188903	0.0778395	0.0884771	0.103212	0.151963	0.0898326	0.0924057	0.167629	0.0555829	0.114304	0.102026	0.0730295	0.153114	0.158066	0.0457145	0.10531	0.0924095	0.109596	0.162559	0.125749	0.252895	0.0767488	0.139503	0.125864	0.127106	0.0495446	0.00773757		549.053	0.0279875
		549.444	0.0531014	0.056062	0.126982	0.233626	0.167175	0.0873469	0.199075	0.12189	0.158769	0.138314	0.201461	0.217274	0.110286	0.155888	0.13651	0.0628302	0.0927933	0.201154	0.0776744	0.0909287	0.11799	0.150875	0.0919017	0.0797781	0.170163	0.0493948	0.105544	0.0837369	0.0693047	0.158034	0.151373	0.0449218	0.112061	0.0931404	0.104292	0.13438	0.109854	0.243892	0.0727838	0.123991	0.127069	0.123991	0.0506672	0.00791289		549.444	0.0203426
		549.835	0.0479351	0.0584601	0.114201	0.216567	0.164155	0.0946482	0.207159	0.115154	0.154246	0.144605	0.234925	0.208719	0.104924	0.139399	0.137793	0.104632	0.0980716	0.15646	0.0799822	0.0760386	0.122479	0.149164	0.0865312	0.0826799	0.16189	0.0450243	0.117467	0.0958104	0.0625542	0.178238	0.1346	0.05139	0.117838	0.0981864	0.0800231	0.149505	0.106953	0.240805	0.0735181	0.118162	0.121646	0.123233	0.0494631	0.00772484		549.835	0.0265707
		550.226	0.0492599	0.0661216	0.124816	0.235299	0.153215	0.0875032	0.206707	0.110262	0.162186	0.127676	0.204385	0.225343	0.109704	0.140673	0.135162	0.0752129	0.0965415	0.171745	0.0790532	0.0836378	0.122719	0.130863	0.0958219	0.0882542	0.175403	0.0469133	0.103885	0.0970057	0.0659019	0.154178	0.162654	0.0457667	0.10932	0.0902346	0.103388	0.153783	0.10862	0.229878	0.0689413	0.125931	0.120676	0.12304	0.049207	0.00768484		550.226	0.0395453
		550.617	0.0457012	0.0554498	0.114392	0.248666	0.151589	0.0885961	0.184528	0.126465	0.129888	0.135664	0.190353	0.209472	0.0975156	0.135747	0.14508	0.104022	0.0970793	0.175225	0.0653947	0.0755133	0.116823	0.118504	0.0851802	0.0736102	0.169427	0.0493566	0.114372	0.0951724	0.0643609	0.173657	0.135149	0.05041	0.108804	0.0929733	0.0894238	0.156545	0.102382	0.231478	0.0795955	0.105094	0.126158	0.119874	0.0484381	0.00756476		550.617	0.0316888
		551.008	0.0452592	0.0521131	0.10938	0.23333	0.138661	0.0777375	0.169261	0.11535	0.136591	0.123116	0.200563	0.213212	0.0979945	0.143771	0.129781	0.0418418	0.0891836	0.187152	0.0714701	0.0808865	0.105682	0.145284	0.0782666	0.0812997	0.168661	0.0493228	0.123696	0.0841108	0.078477	0.153597	0.155677	0.0412432	0.109153	0.0973059	0.0816095	0.131912	0.113385	0.251627	0.0753591	0.127523	0.110958	0.117581	0.0504568	0.00788003		551.008	0.0298887
		551.399	0.0418271	0.056475	0.121346	0.241972	0.154422	0.0764945	0.192519	0.128775	0.145702	0.122802	0.212	0.199652	0.096993	0.148349	0.141198	0.0771792	0.0859908	0.15661	0.0642373	0.065138	0.0938301	0.136569	0.0917717	0.0781617	0.167905	0.0461831	0.11001	0.0941326	0.075467	0.167398	0.157677	0.0435993	0.108741	0.0863544	0.09543	0.133471	0.112127	0.248505	0.0655479	0.10324	0.111124	0.118462	0.0509666	0.00795964		551.399	0.0380573
		551.79	0.0466929	0.0651551	0.118788	0.205654	0.165986	0.0928922	0.18702	0.109412	0.15296	0.126889	0.19213	0.205695	0.0896688	0.150686	0.130648	0.0629969	0.06834	0.160264	0.0647233	0.067309	0.116286	0.13849	0.0973024	0.0754013	0.170433	0.0397229	0.106734	0.0906115	0.0618763	0.160995	0.15083	0.0458648	0.121902	0.0936775	0.0855345	0.16015	0.107419	0.231131	0.0687467	0.127873	0.12249	0.117985	0.0481679	0.00752256		551.79	0.0260725
		552.181	0.035998	0.0596967	0.128233	0.234576	0.153904	0.0723464	0.176374	0.11357	0.136099	0.139945	0.19496	0.20706	0.0974794	0.135896	0.136061	0.100648	0.0716119	0.174963	0.0772117	0.0668174	0.102748	0.1254	0.0778468	0.0832567	0.173441	0.048538	0.112877	0.0863896	0.0677165	0.15308	0.14015	0.0441921	0.110121	0.0838199	0.0683994	0.135955	0.112857	0.218093	0.0626477	0.136457	0.120133	0.116526	0.0482467	0.00753486		552.181	0.0266457
		552.572	0.0479807	0.051819	0.10886	0.227845	0.147955	0.0706944	0.183692	0.105594	0.136368	0.121066	0.197352	0.217702	0.100376	0.127997	0.121493	0.0717438	0.0875164	0.157062	0.0681272	0.069282	0.109515	0.11068	0.105801	0.0817619	0.165908	0.0499931	0.0992929	0.0910071	0.0679488	0.151105	0.11308	0.044094	0.118711	0.0814003	0.0853551	0.146356	0.109559	0.232262	0.0631223	0.114795	0.115787	0.114099	0.0476041	0.00743452		552.572	0.0444205
		552.963	0.0489031	0.05192	0.12348	0.231166	0.135126	0.0714685	0.1711	0.0847068	0.135263	0.119855	0.196975	0.191808	0.0965394	0.117952	0.130682	0.034236	0.0848711	0.176217	0.0690782	0.0719524	0.0958989	0.1337	0.0945213	0.0744199	0.164211	0.0456232	0.113065	0.0894877	0.0644061	0.152981	0.141443	0.0410782	0.10497	0.0907787	0.0942871	0.131244	0.106997	0.213449	0.0680779	0.100817	0.109347	0.111563	0.0471095	0.00735726		552.963	0.0404857
		553.355	0.0453524	0.0632665	0.120387	0.223131	0.13403	0.0749155	0.171759	0.110523	0.143358	0.122478	0.188982	0.197105	0.0895924	0.126855	0.125455	0.074783	0.0845374	0.158942	0.0656299	0.0726117	0.10857	0.123712	0.0711847	0.0743653	0.146878	0.0400596	0.105525	0.084747	0.0644399	0.136255	0.130723	0.040995	0.0923956	0.0842746	0.0847769	0.133618	0.106458	0.227515	0.0652085	0.104375	0.11122	0.110512	0.0453779	0.00708683		553.355	0.0203328
		553.746	0.0405985	0.0656623	0.112303	0.222092	0.139368	0.0867731	0.199439	0.089215	0.1232	0.124491	0.189385	0.188067	0.0920769	0.120756	0.133826	0.0960972	0.07125	0.180572	0.0699122	0.0668902	0.0968665	0.123367	0.0870561	0.0761339	0.148929	0.041591	0.107779	0.0862013	0.0645011	0.145661	0.144609	0.0453839	0.0969754	0.0817944	0.0615589	0.121852	0.101133	0.209353	0.0547632	0.114229	0.109439	0.110516	0.0460853	0.00719731		553.746	0.0540243
		554.137	0.0312773	0.0356555	0.110684	0.158075	0.129778	0.0591704	0.164466	0.045763	0.126876	0.131762	0.203179	0.192376	0.0891758	0.095914	0.122106	0.00840428	0.0662413	0.154745	0.0549319	0.0560203	0.0887699	0.122835	0.0918575	0.0754867	0.142977	0.0380808	0.0988336	0.0741313	0.0406293	0.118218	0.124927	0.0407288	0.11023	0.0846544	0.0758076	0.12025	0.10557	0.207003	0.0678972	0.105066	0.106029	0.0994289	0.0467424	0.00729993		554.137	0.0241151
		554.528	0.0379606	0.0629904	0.0895183	0.217168	0.135955	0.0724204	0.165899	0.0773122	0.124944	0.10976	0.190387	0.203263	0.096585	0.117439	0.120358	0.0568308	0.0889889	0.148839	0.0526012	0.0661873	0.100724	0.0937678	0.0763446	0.070255	0.154031	0.0431415	0.0854565	0.0774057	0.0430933	0.1463	0.135353	0.040004	0.0949141	0.0818531	0.0912284	0.138081	0.0873322	0.198616	0.0594449	0.103872	0.10901	0.10404	0.0456491	0.00712919		554.528	0.0343399
		554.919	0.0473296	0.0638174	0.111338	0.212421	0.134562	0.0764537	0.174548	0.0816894	0.134315	0.113139	0.182038	0.173326	0.0851537	0.126434	0.110278	0.0741777	0.0794061	0.135989	0.0539195	0.0594005	0.086757	0.118853	0.079165	0.0755371	0.141396	0.0433284	0.093032	0.081366	0.0634728	0.155414	0.122319	0.0411583	0.105959	0.0776637	0.0922692	0.126425	0.0974947	0.211572	0.0463826	0.100844	0.110056	0.104883	0.0430904	0.00672959		554.919	0.0328865
		555.31	0.0485506	0.0759905	0.0978592	0.194993	0.122471	0.0755643	0.175794	0.0821116	0.119696	0.108421	0.172779	0.19299	0.0789534	0.128533	0.117192	0.0774711	0.0771722	0.14855	0.0618208	0.0726034	0.141692	0.104193	0.0858894	0.0657969	0.135996	0.0426137	0.0958594	0.0788462	0.0504687	0.160402	0.0997106	0.0429038	0.101364	0.0797599	0.0763058	0.132385	0.109423	0.195061	0.0517286	0.0918367	0.102939	0.104261	0.0417063	0.00651343		555.31	0.0413919
		555.701	0.0562436	0.0484132	0.0973178	0.224545	0.137045	0.0753331	0.164329	0.095601	0.132578	0.110865	0.189427	0.177342	0.084728	0.135163	0.127672	0.0528563	0.0687506	0.150696	0.0596111	0.0719971	0.09561	0.11715	0.0783086	0.0751077	0.130851	0.0454268	0.105241	0.0702159	0.0533129	0.14442	0.118905	0.0395476	0.0970516	0.0740533	0.0791958	0.106745	0.0903435	0.199409	0.0538696	0.10808	0.101497	0.103533	0.0439077	0.00685723		555.701	0.0581472
		556.092	0.0462369	0.0479101	0.096588	0.229237	0.138517	0.0672334	0.175628	0.0894825	0.11806	0.125386	0.169329	0.160882	0.0876596	0.12239	0.105403	0.0773266	0.0699993	0.165582	0.0665338	0.06503	0.0995561	0.105869	0.079416	0.0718337	0.135781	0.0450307	0.103318	0.0735688	0.0492099	0.110343	0.132778	0.0408626	0.10119	0.0798779	0.0725659	0.124525	0.0771003	0.206835	0.0532447	0.0900709	0.0987657	0.101857	0.0436991	0.00682466		556.092	0.0462519
		556.483	0.0447494	0.0632316	0.0851271	0.199086	0.137785	0.0658246	0.161459	0.064832	0.124149	0.103382	0.197938	0.171318	0.084029	0.120343	0.118787	0.0789309	0.0718072	0.149401	0.0515604	0.0690626	0.0923664	0.115177	0.0783463	0.0777108	0.14697	0.0438377	0.0969165	0.0764351	0.0525982	0.140285	0.105204	0.0408704	0.0889178	0.0781055	0.0663414	0.121401	0.0942648	0.204776	0.0567994	0.101558	0.0982382	0.100974	0.0427529	0.00667688		556.483	0.0466518
		556.874	0.0378146	0.0632936	0.105496	0.174491	0.128255	0.0526335	0.165445	0.0530954	0.124613	0.111989	0.189462	0.178882	0.0799564	0.137782	0.125073	0.0775754	0.0603528	0.183281	0.0491664	0.0541719	0.0913173	0.128174	0.0692538	0.0654264	0.136786	0.0363548	0.0993823	0.0830794	0.0558098	0.105013	0.122125	0.0348453	0.0891086	0.0756871	0.0727367	0.121099	0.106499	0.197445	0.0608202	0.124659	0.104055	0.100793	0.0442909	0.00691708		556.874	0.0554193
		557.265	0.0485673	0.0510118	0.0954557	0.21882	0.129102	0.0703249	0.155457	0.0880405	0.12624	0.0987454	0.172355	0.17286	0.068428	0.114704	0.115323	0.0635929	0.0629279	0.146947	0.0518774	0.0709474	0.086023	0.109813	0.0616839	0.0611975	0.123699	0.0367902	0.0867332	0.0685187	0.057311	0.131069	0.132183	0.0376842	0.0919205	0.0699207	0.0724867	0.11592	0.0854732	0.224849	0.0593021	0.112948	0.0968212	0.098636	0.0444776	0.00694623		557.265	0.056098
		557.656	0.0539234	0.0420039	0.0784894	0.182538	0.130422	0.0595608	0.147696	0.0959518	0.12729	0.108876	0.182288	0.16585	0.0809042	0.12037	0.09638	0.0687705	0.062421	0.150145	0.0541023	0.0647952	0.0964073	0.110773	0.0703615	0.0600815	0.126261	0.036011	0.0946233	0.0624584	0.0629528	0.131006	0.121121	0.0392754	0.0963163	0.0714129	0.0808651	0.118867	0.0918629	0.18936	0.0557109	0.100028	0.092234	0.0970918	0.0398643	0.00622576		557.656	0.0615052
		558.047	0.0442837	0.0389695	0.0807292	0.19134	0.111552	0.0693417	0.151185	0.073435	0.132414	0.0934833	0.170597	0.161593	0.0763935	0.101711	0.121901	0.0648915	0.0628617	0.146305	0.0562702	0.0638817	0.0878485	0.107263	0.0607678	0.0669387	0.124546	0.0397605	0.0842697	0.0612446	0.0598888	0.155323	0.10957	0.0394112	0.104478	0.0614777	0.0613155	0.129738	0.0980301	0.197265	0.0421165	0.103716	0.0991236	0.0952983	0.0418707	0.0065391		558.047	0.0529895
		558.439	0.0488586	0.0608117	0.0987032	0.187454	0.120532	0.0752868	0.157071	0.0600576	0.116429	0.111534	0.1711	0.166486	0.0749848	0.109915	0.105707	0.0537623	0.062756	0.139145	0.0503012	0.0546483	0.0975766	0.0970076	0.0695782	0.0659175	0.134568	0.0363538	0.0865877	0.0647196	0.0618411	0.135067	0.116671	0.0387367	0.0915242	0.0910882	0.0679227	0.121163	0.0940633	0.184856	0.0599544	0.0893542	0.0998624	0.0958526	0.0392832	0.00613501		558.439	0.0662381
		558.83	0.0275528	0.0327764	0.101009	0.176515	0.113178	0.0696486	0.151402	0.0691723	0.114032	0.0991694	0.162699	0.165163	0.0760024	0.11661	0.124967	0.0653682	0.0627513	0.126273	0.0553785	0.0606064	0.0858793	0.0946876	0.0694377	0.0589207	0.13049	0.037483	0.082039	0.0638565	0.0560126	0.132936	0.101931	0.0337774	0.0964578	0.0673893	0.0652449	0.119944	0.075162	0.196229	0.0503263	0.103607	0.102505	0.092551	0.0402662	0.00628852		558.83	0.0737758
		559.221	0.0555894	0.0657291	0.0979936	0.205678	0.129222	0.0636014	0.165554	0.0664991	0.105906	0.0951945	0.155396	0.161224	0.0817199	0.11557	0.121173	0.0514946	0.07115	0.137975	0.0526277	0.0642311	0.068887	0.116404	0.0590868	0.0628364	0.113449	0.0349629	0.0908722	0.0674029	0.0432696	0.132166	0.0908613	0.0313822	0.0964808	0.071105	0.0779342	0.1018	0.0950996	0.19077	0.0479577	0.103996	0.0897241	0.0939018	0.0406554	0.0063493		559.221	0.0590767
		559.612	0.0391465	0.0509964	0.0834496	0.184111	0.11524	0.0630788	0.140674	0.0715457	0.0998684	0.105283	0.16336	0.156152	0.0813168	0.105271	0.129688	0.0590785	0.0591186	0.134742	0.0463873	0.060597	0.090044	0.108709	0.0796155	0.0567427	0.128309	0.0374933	0.0984023	0.0690095	0.0599322	0.136662	0.0952092	0.0319182	0.0926499	0.0754129	0.071699	0.115903	0.08785	0.193463	0.0459043	0.103918	0.0850999	0.0930013	0.0390239	0.00609451		559.612	0.0757102
		560.003	0.0358654	0.0620808	0.100427	0.192972	0.113351	0.0839313	0.146644	0.0701863	0.118786	0.0991224	0.161139	0.177759	0.0836621	0.0972025	0.102851	0.0349357	0.0588862	0.151275	0.052759	0.0483463	0.0896045	0.120268	0.0618477	0.0591488	0.128234	0.0330263	0.0898881	0.0608316	0.0493564	0.128686	0.141498	0.0347794	0.0976343	0.0698646	0.0662297	0.0989373	0.0774534	0.183128	0.04773	0.0901658	0.0827793	0.0927628	0.0418905	0.00654219		560.003	0.101055
		560.394	0.034245	0.0654595	0.0807105	0.189924	0.106917	0.0556038	0.1226	0.0487611	0.105432	0.109892	0.161313	0.157106	0.0740248	0.0991494	0.120041	0.00969305	0.0744325	0.129581	0.0492694	0.0699409	0.0728523	0.111571	0.0727905	0.0672989	0.116053	0.0316072	0.0908824	0.0631329	0.0389301	0.119319	0.116982	0.0390463	0.0692157	0.0678446	0.0702383	0.108623	0.0674072	0.174865	0.053296	0.0898595	0.0839086	0.0875566	0.0393496	0.00614538		560.394	0.0638941
		560.785	0.042758	0.0472444	0.083052	0.148082	0.109373	0.0704351	0.137217	0.0658988	0.101792	0.0927167	0.162844	0.162311	0.0797276	0.0940346	0.113918	0.0352122	0.0584847	0.124587	0.0443735	0.0543959	0.0906772	0.0842474	0.0664511	0.0657161	0.107339	0.0373296	0.0861798	0.0568704	0.050945	0.140163	0.0878819	0.0349962	0.0821861	0.0622952	0.0610421	0.11108	0.0871765	0.189629	0.0412127	0.0846407	0.0923233	0.0865571	0.0374088	0.00584228		560.785	0.0724476
		561.176	0.0350007	0.0328828	0.0978624	0.142411	0.114516	0.064137	0.134947	0.0621143	0.102461	0.0969271	0.148711	0.158635	0.0730263	0.0973665	0.115897	0.0418322	0.0602438	0.128196	0.0492032	0.0650796	0.0783845	0.0931113	0.0755738	0.057557	0.107356	0.0315312	0.0785043	0.0544947	0.0423725	0.12807	0.110523	0.0349295	0.0913633	0.0722175	0.0692127	0.0951401	0.0783831	0.164828	0.0447416	0.0934882	0.0892022	0.0856691	0.0352621	0.00550702		561.176	0.075678
		561.567	0.0379362	0.0387141	0.0959466	0.153203	0.10537	0.0673983	0.126754	0.0449505	0.0913246	0.0987746	0.147327	0.156331	0.0687472	0.0939504	0.109675	0.0109039	0.0512674	0.162923	0.0441468	0.0629007	0.085414	0.0824023	0.0711261	0.0546379	0.118574	0.0353248	0.0757077	0.059923	0.0602406	0.11752	0.0907512	0.0350601	0.0938072	0.0631682	0.0398268	0.107319	0.0859676	0.184128	0.0516807	0.104523	0.0785538	0.0844927	0.0389764	0.00608709		561.567	0.0827413
		561.958	0.0381857	0.0749308	0.0933144	0.198436	0.121198	0.0459854	0.139731	0.0649955	0.105351	0.091983	0.146916	0.149069	0.0718504	0.0891636	0.104352	0.0389013	0.0536539	0.148949	0.0543458	0.0545993	0.0802162	0.0974796	0.0816671	0.0526778	0.0976973	0.0326948	0.0756501	0.0579878	0.0459376	0.119039	0.0958644	0.032009	0.0802767	0.062302	0.067059	0.0931392	0.0846434	0.170805	0.051372	0.0937115	0.0853382	0.0864263	0.0380808	0.00594722		561.958	0.0868109
		562.349	0.0462696	0.0866579	0.0855946	0.142684	0.117192	0.0669911	0.144422	0.0743928	0.100713	0.0893618	0.146799	0.140905	0.0766163	0.125586	0.10104	0.0210599	0.0615703	0.135422	0.0489864	0.058266	0.0810586	0.11567	0.059086	0.0595899	0.103836	0.0287537	0.0630495	0.0693503	0.0317495	0.116903	0.0956265	0.0328632	0.0877312	0.0593125	0.0494732	0.104943	0.0820793	0.157568	0.0415238	0.0898767	0.0841195	0.0849925	0.0352451	0.00550437		562.349	0.0960408
		562.74	0.0284013	0.0250805	0.0945133	0.198981	0.108012	0.0672546	0.128815	0.0660048	0.102372	0.0829094	0.149136	0.14051	0.0810217	0.0999887	0.0986305	0.0567836	0.0534119	0.125702	0.0451132	0.049959	0.0732232	0.0934301	0.0684499	0.0624007	0.100529	0.0266682	0.0812522	0.0555197	0.0308588	0.128392	0.106062	0.031161	0.0653521	0.0584412	0.0484304	0.0832534	0.0649922	0.165072	0.0455192	0.0899241	0.0785866	0.0819541	0.0386865	0.00604182		562.74	0.10354
		563.132	0.0470564	0.04625	0.0819074	0.163539	0.0980268	0.0565497	0.13354	0.0735611	0.117847	0.0817444	0.144575	0.140317	0.0613031	0.0908981	0.122823	0.0222659	0.0590081	0.117748	0.0432029	0.0389771	0.065617	0.0843626	0.0541426	0.0504953	0.100641	0.0344615	0.0798744	0.0581585	0.0465762	0.115507	0.101081	0.0305398	0.0670987	0.0594563	0.0598148	0.114054	0.0797919	0.161686	0.0477674	0.0792705	0.0793335	0.080753	0.035827	0.00559524		563.132	0.0973841
		563.523	0.0379542	0.0592368	0.0668361	0.167108	0.0997035	0.0435076	0.125665	0.0718992	0.102076	0.0924514	0.153536	0.141544	0.0585114	0.088204	0.107636	0.0165874	0.0672762	0.141939	0.0452497	0.0493751	0.0807217	0.0889477	0.0631474	0.0467287	0.105559	0.0305085	0.0716558	0.0583684	0.0270899	0.122598	0.0899029	0.0310677	0.0656172	0.0685012	0.0523563	0.0985208	0.071803	0.168577	0.0514992	0.0913359	0.0746188	0.0803761	0.0375038	0.00585711		563.523	0.0985083
		563.914	0.037021	0.025962	0.0856717	0.164069	0.10433	0.0647776	0.126128	0.0806388	0.100596	0.0841971	0.148776	0.14664	0.0677493	0.09421	0.112442	0.0618662	0.0533924	0.130677	0.0387008	0.0439782	0.0727648	0.106765	0.0557489	0.052621	0.111569	0.0249646	0.0762924	0.0474912	0.0327125	0.124309	0.0904462	0.0273554	0.0656521	0.0672225	0.0611728	0.0915121	0.0863116	0.165915	0.0405978	0.0796631	0.079212	0.0812713	0.0371192	0.00579705		563.914	0.105367
		564.305	0.0413165	0.0434865	0.0729733	0.151943	0.10237	0.0658634	0.134649	0.0474955	0.101726	0.0741529	0.145209	0.125402	0.0672993	0.0893307	0.0972663	0.043631	0.050238	0.107591	0.0481449	0.0452158	0.0882435	0.0825872	0.0673267	0.0503218	0.103066	0.0340446	0.0722649	0.0565067	0.0538303	0.129513	0.0931195	0.0315633	0.0716701	0.0636493	0.0689054	0.0997533	0.0685377	0.155586	0.0493025	0.0856909	0.0828487	0.0796009	0.0324061	0.00506098		564.305	0.0996724
		564.696	0.0404655	0.026442	0.0795263	0.16047	0.0998768	0.0531257	0.132288	0.0700864	0.0909074	0.0797105	0.125581	0.129367	0.0609075	0.0951385	0.110786	0.0420938	0.0498106	0.115827	0.0472668	0.0493785	0.0652444	0.0963629	0.0522132	0.0481805	0.113444	0.0293256	0.0654517	0.0498358	0.0426026	0.109951	0.0755444	0.0312628	0.0757886	0.063479	0.0720019	0.0925565	0.0702832	0.175265	0.0385976	0.0813378	0.0745899	0.0776188	0.0347943	0.00543396		564.696	0.109156
		565.087	0.0287621	0.0577764	0.0682645	0.174988	0.109414	0.0449409	0.134857	0.0651877	0.0967927	0.0851518	0.136196	0.140636	0.0622787	0.0901425	0.0763549	0.0382345	0.0436274	0.135725	0.0437778	0.0376692	0.0710291	0.0734277	0.0604174	0.0544972	0.105992	0.0268396	0.0652483	0.0526421	0.04319	0.104977	0.0791777	0.0294214	0.0675153	0.0563189	0.0449784	0.0847627	0.0736136	0.156887	0.0383021	0.0975622	0.0749135	0.0764022	0.0363171	0.00567178		565.087	0.122545
		565.478	0.0444186	0.0387859	0.0734096	0.138119	0.0987922	0.0617993	0.127365	0.0465296	0.08249	0.066719	0.126895	0.136169	0.0635365	0.077025	0.0842073	0.0212693	0.0471744	0.122652	0.0459267	0.0485442	0.0639074	0.0893849	0.054644	0.0585494	0.0998584	0.0326002	0.0587765	0.0553571	0.0433918	0.116397	0.0899159	0.0294228	0.0668952	0.053537	0.0656314	0.0894574	0.0628515	0.148845	0.0465684	0.0881595	0.0773206	0.0742268	0.0317234	0.00495437		565.478	0.125078
		565.869	0.0376208	0.014724	0.07254	0.214878	0.100654	0.0543812	0.123267	0.0639472	0.102399	0.0692632	0.126671	0.136427	0.0722633	0.0936086	0.0824008	0.0584684	0.0456159	0.125589	0.0511587	0.0423832	0.0726798	0.0842309	0.0522264	0.0453109	0.0930978	0.0296796	0.0594415	0.0547743	0.0375186	0.114758	0.10759	0.0314466	0.0538266	0.0547771	0.0561784	0.0911031	0.0539118	0.137076	0.0430103	0.0661788	0.0713141	0.0755705	0.0377538	0.00589615		565.869	0.108421
		566.26	0.0306306	0.0432066	0.0787025	0.160906	0.101672	0.0570413	0.114776	0.0694386	0.0679153	0.0673553	0.125861	0.125114	0.0619096	0.0997272	0.0992222	0.0143168	0.045726	0.101328	0.0437038	0.0396693	0.0691133	0.0921034	0.0598756	0.0419035	0.0893528	0.0283302	0.0747679	0.0496116	0.0345234	0.106821	0.0894738	0.0291067	0.0712358	0.058921	0.0521255	0.0984212	0.0632059	0.154904	0.0380382	0.0811638	0.072616	0.0732643	0.0334438	0.00522304		566.26	0.130607
		566.651	0.0434895	0.0625128	0.0728547	0.137692	0.0840593	0.043513	0.124567	0.06726	0.0898535	0.0645875	0.129592	0.143634	0.0589924	0.0852496	0.102274	0.0221856	0.0489659	0.119214	0.0488374	0.0392728	0.0693534	0.0662089	0.0562431	0.0523376	0.0928332	0.0322401	0.0720179	0.0501946	0.0292332	0.118741	0.102247	0.0327793	0.0666394	0.0452364	0.0488579	0.0869099	0.0667556	0.143605	0.0388496	0.0793811	0.0738119	0.0734899	0.0324789	0.00507234		566.651	0.117108
		567.042	0.0531852	0.0351064	0.0841927	0.135336	0.0908669	0.059515	0.132315	0.0666522	0.0952965	0.0666199	0.109916	0.128344	0.0584793	0.0778552	0.0847705	-0.00139841	0.0477849	0.116678	0.0403002	0.035765	0.0687932	0.0619648	0.0562361	0.0434539	0.0892363	0.02559	0.0687381	0.0463526	0.0238339	0.107781	0.0787404	0.028705	0.081483	0.0568372	0.0588066	0.0994881	0.0554856	0.14836	0.0399452	0.0763913	0.0699199	0.0708225	0.032784	0.00512001		567.042	0.123006
		567.433	0.0314163	0.0506819	0.0655343	0.156222	0.105364	0.0609863	0.118777	0.0309933	0.0909529	0.0729217	0.113222	0.126522	0.0581624	0.094781	0.107514	0.00408928	0.0565318	0.127167	0.048445	0.0339266	0.0802522	0.0643514	0.0467681	0.044629	0.084849	0.0239278	0.0571142	0.0470118	0.0336078	0.115052	0.0708331	0.0279192	0.079306	0.0571978	0.0523088	0.0915373	0.0512997	0.144863	0.0395328	0.0822391	0.0711812	0.0712193	0.0346634	0.00541352		567.433	0.164905
		567.824	0.0267855	0.0480072	0.0783154	0.145843	0.085828	0.053183	0.114162	-0.00447245	0.086442	0.0693094	0.126686	0.125914	0.0579554	0.0862631	0.0818169	0.0504633	0.0512292	0.115575	0.0395577	0.046317	0.0618572	0.0698125	0.0553689	0.0431678	0.0933709	0.0262694	0.0636286	0.0493506	0.017698	0.0892343	0.0648581	0.0282237	0.0667441	0.0501751	0.062421	0.081177	0.0506687	0.150603	0.040577	0.0883052	0.0671643	0.0684355	0.0331401	0.00517561		567.824	0.144116
		568.216	0.0422121	0.0432025	0.0626066	0.1636	0.0879831	0.0402428	0.111233	0.0405945	0.0834715	0.0711253	0.113477	0.120577	0.0562604	0.0813649	0.0986693	0.0425337	0.0502286	0.10233	0.0444084	0.0355416	0.0609617	0.0692305	0.0482246	0.0611862	0.0950629	0.0311978	0.0676052	0.0451305	0.0324096	0.0875758	0.0715688	0.0253833	0.0710909	0.0555612	0.0557647	0.0850038	0.0566365	0.153277	0.0366524	0.0791105	0.0727509	0.0695865	0.0312102	0.00487422		568.216	0.144603
		568.607	0.0386006	0.0401018	0.0765243	0.14746	0.0858824	0.0452528	0.108158	0.0426893	0.0940266	0.0571641	0.1175	0.120774	0.0607307	0.0883561	0.0908738	0.0397225	0.0509245	0.0994447	0.047601	0.0355473	0.0816047	0.0718095	0.0509253	0.0390802	0.094525	0.0308287	0.0662689	0.0464735	0.0386942	0.108099	0.0703152	0.0262495	0.0686251	0.0514452	0.0568284	0.087197	0.0655201	0.141942	0.0429585	0.0787937	0.0687639	0.0701045	0.0298729	0.00466536		568.607	0.15114
		568.998	0.0382472	0.0409631	0.0695148	0.150864	0.0823994	0.0363837	0.115962	0.0627787	0.0871478	0.0704602	0.113762	0.123114	0.0552399	0.0831877	0.0859284	0.0585541	0.0366713	0.109907	0.0439513	0.0413971	0.0759839	0.0460333	0.055922	0.0520263	0.101611	0.0271294	0.0650422	0.0443756	0.0431327	0.081683	0.0887057	0.0245134	0.0530062	0.0390104	0.0555521	0.0886132	0.0585825	0.138212	0.0385776	0.0628989	0.0686469	0.0686754	0.0301736	0.00471232		568.998	0.158935
		569.389	0.0350747	0.0380556	0.0740302	0.131996	0.0805715	0.0558982	0.104621	0.048583	0.0830966	0.0736078	0.106767	0.108434	0.0595167	0.0954294	0.102236	0.019337	0.041814	0.0758539	0.039105	0.0404018	0.0636323	0.0760114	0.0485269	0.0486282	0.0966909	0.0314938	0.0689753	0.0442065	0.0281585	0.0919203	0.0946506	0.0254619	0.0543711	0.0478706	0.0438045	0.0801983	0.0531645	0.139191	0.0377813	0.0793247	0.0655558	0.0666841	0.0288269	0.004502		569.389	0.181146
		569.78	0.0361089	0.0308308	0.062464	0.147058	0.0904691	0.0358133	0.120275	0.0304641	0.0868437	0.0665841	0.107621	0.109608	0.059796	0.0932755	0.122829	0.0306417	0.0437012	0.102502	0.0372445	0.0411785	0.0622625	0.0870917	0.0379121	0.0522773	0.0896148	0.0239465	0.0533136	0.0379755	0.0298794	0.104629	0.0841846	0.0288693	0.069741	0.0577403	0.0528494	0.0796398	0.0651243	0.162319	0.0368837	0.0853734	0.0736469	0.0690386	0.0338117	0.0052805		569.78	0.184791
		570.171	0.0269608	0.0376837	0.0600517	0.120334	0.100004	0.0556437	0.0998612	0.0394749	0.090166	0.0788431	0.110711	0.102714	0.0592684	0.0719641	0.0920585	0.0425483	0.0452078	0.112825	0.0371969	0.0519591	0.0587755	0.0856147	0.0462037	0.0464325	0.0941263	0.0285811	0.0685889	0.0515008	0.0372208	0.0927845	0.0640533	0.0308148	0.065974	0.0473313	0.0415376	0.0844001	0.0593868	0.13807	0.0308438	0.049694	0.0747553	0.0666382	0.0279272	0.0043615		570.171	0.187033
		570.562	0.0345676	0.0498225	0.0663518	0.109167	0.0906716	0.0455897	0.108007	0.045178	0.0773634	0.0659977	0.113302	0.111582	0.0599499	0.0802522	0.0756493	0.0354988	0.0353684	0.0946421	0.0346941	0.0482156	0.0608026	0.0840343	0.0461096	0.0381296	0.0723925	0.0219816	0.0624536	0.0411015	0.0257773	0.104021	0.0636161	0.0269188	0.0681407	0.0440214	0.0483573	0.0717324	0.0594018	0.129857	0.0310979	0.0635831	0.0657875	0.0636875	0.0269548	0.00420963		570.562	0.205327
		570.953	0.035343	0.0238225	0.0616464	0.0939066	0.0856055	0.0569618	0.107839	0.0376558	0.0765388	0.0783503	0.121017	0.10784	0.0541229	0.0552295	0.0824233	0.0273634	0.0376789	0.0894183	0.0364763	0.0350778	0.0547493	0.0644692	0.0471516	0.0354973	0.0986291	0.0236493	0.0653288	0.0452473	0.039304	0.0920985	0.0542526	0.0277086	0.0623528	0.0452568	0.0373177	0.0795595	0.066826	0.131858	0.0367229	0.0542629	0.061395	0.0616574	0.0272784	0.00426016		570.953	0.204412
		571.344	0.0360176	0.0253194	0.0664791	0.133261	0.0969031	0.0243621	0.104099	0.0444843	0.07083	0.0681513	0.115349	0.110647	0.0479101	0.072228	0.0750986	0.0482351	0.0297556	0.115871	0.0355761	0.0393085	0.0572042	0.0694866	0.0551926	0.0372119	0.0770721	0.0266024	0.0493194	0.0501156	0.0303717	0.0949205	0.0799946	0.0217904	0.0715885	0.0415546	0.0369923	0.0685596	0.0627135	0.131695	0.0330974	0.060059	0.0647939	0.0629322	0.0297856	0.00465173		571.344	0.216044
		571.735	0.0352802	0.0269247	0.0604044	0.11754	0.0842208	0.0457998	0.102556	0.0540573	0.0725641	0.0581721	0.111538	0.11179	0.0572923	0.0706872	0.0535554	-0.00563069	0.0439936	0.0968731	0.032616	0.0393525	0.05866	0.0761112	0.0442744	0.0441588	0.0805289	0.0240038	0.0592562	0.0458519	0.0317013	0.0947167	0.0621833	0.0224028	0.0657689	0.0438378	0.0480954	0.0819579	0.0581824	0.140343	0.0302452	0.0773346	0.0600159	0.0614443	0.0292139	0.00456245		571.735	0.218488
		572.126	0.0422804	0.0537905	0.0583	0.109689	0.0803986	0.0427076	0.0983586	0.0379771	0.0841495	0.0543496	0.101018	0.105353	0.046179	0.0582133	0.0821566	0.00527039	0.0306545	0.0987193	0.0374954	0.0364433	0.0575001	0.0872519	0.0579741	0.0369509	0.0879344	0.0266237	0.0599868	0.0417785	0.0333383	0.0811867	0.0714437	0.0259597	0.0676668	0.0459642	0.0444034	0.0781552	0.0550064	0.127856	0.030709	0.0410785	0.0585237	0.0605072	0.0268593	0.00419472		572.126	0.221427
		572.517	0.0383317	0.0350581	0.0691795	0.107753	0.0858733	0.0423357	0.10319	0.0336648	0.0766934	0.0670973	0.113155	0.105035	0.0492446	0.0778878	0.0707901	0.0206673	0.0421625	0.0925459	0.033828	0.0358923	0.0574274	0.062427	0.0500605	0.0433426	0.0815467	0.019065	0.0407054	0.0433976	0.0313937	0.0783145	0.0641277	0.026652	0.061557	0.042999	0.0461265	0.0752007	0.0581731	0.116508	0.0283924	0.0578871	0.0592083	0.0596316	0.0258001	0.0040293		572.517	0.215475
		572.909	0.0406355	0.0365346	0.0538062	0.129546	0.0793602	0.0444154	0.113628	0.0432138	0.0813429	0.0787796	0.105089	0.113709	0.0578063	0.0744215	0.0902084	0.0272579	0.0410881	0.087251	0.0383803	0.0481475	0.0563134	0.0597799	0.0449372	0.0378097	0.0771466	0.0252528	0.0570592	0.0498476	0.0269859	0.103821	0.0714959	0.0268304	0.0640771	0.0489314	0.0372768	0.0791138	0.047296	0.12754	0.0354659	0.0698078	0.0621201	0.0632568	0.0278532	0.00434994		572.909	0.234824
		573.3	0.032567	0.0368043	0.052169	0.137102	0.0807958	0.0548856	0.098606	0.0414051	0.0769434	0.0614638	0.0934493	0.103226	0.055594	0.0748587	0.076288	0.0181863	0.0300774	0.0917317	0.0300551	0.0406469	0.0493504	0.0747775	0.0443068	0.0399014	0.0760889	0.0212268	0.0544419	0.0349819	0.0401387	0.0884979	0.0658036	0.0230051	0.0619895	0.0496836	0.0376102	0.0699552	0.0557413	0.128706	0.0285038	0.0879676	0.0549635	0.0603536	0.0277397	0.00433222		573.3	0.266139
		573.691	0.0333645	0.019525	0.0587357	0.106423	0.0670737	0.0542427	0.102589	0.0483429	0.0704391	0.06718	0.10315	0.0988803	0.052759	0.0845431	0.0867809	0.0313952	0.0452257	0.0771097	0.0292439	0.0441319	0.0504203	0.0685927	0.0486525	0.0353746	0.0704029	0.0261918	0.0539316	0.0455372	0.02376	0.0802752	0.0593097	0.0236401	0.0682317	0.0399885	0.0428645	0.0777728	0.0579482	0.123176	0.0364769	0.0739402	0.0582847	0.0596562	0.0248086	0.00387445		573.691	0.271501
		574.082	0.0345193	0.0243454	0.0471741	0.134518	0.0780315	0.0303776	0.0926444	0.0489399	0.0739179	0.0536886	0.106056	0.106305	0.051622	0.0767045	0.0912095	0.0701634	0.0345807	0.0876846	0.0277767	0.0336008	0.0586244	0.0533466	0.0514965	0.0366991	0.0775112	0.0224829	0.0556892	0.0414776	0.0397181	0.0838498	0.06849	0.0224727	0.0524838	0.0389544	0.0456968	0.0535517	0.0558121	0.129805	0.0293265	0.0617059	0.0610806	0.059613	0.0274414	0.00428562		574.082	0.280678
		574.473	0.0324409	0.0158345	0.0529835	0.124984	0.0853744	0.0403166	0.100443	0.0540584	0.0646624	0.0637288	0.116997	0.0947378	0.0502069	0.073793	0.0739499	0.0479401	0.0452348	0.082886	0.0354153	0.0336678	0.0525038	0.0553979	0.0496378	0.04125	0.070333	0.0190035	0.0607775	0.0372836	0.0171055	0.0690736	0.0587831	0.0263991	0.0599221	0.0478582	0.0335977	0.0735007	0.054399	0.116244	0.0285073	0.0600868	0.0586321	0.0580476	0.0260362	0.00406618		574.473	0.280234
		574.864	0.0276374	0.0354951	0.0521909	0.103138	0.0774637	0.0491578	0.0892569	0.0443962	0.0711917	0.0653132	0.113899	0.093561	0.0456848	0.0687609	0.079511	0.0206391	0.0312122	0.0745067	0.0386574	0.0261024	0.0560872	0.0688516	0.042387	0.0416985	0.0597263	0.0205358	0.0629954	0.0395587	0.0378725	0.0832089	0.0651356	0.0200784	0.0705124	0.0400277	0.0465412	0.0832754	0.0617157	0.12083	0.0321918	0.0725153	0.0703197	0.0586303	0.0248893	0.00388705		574.864	0.299538
		575.255	0.0367908	0.0503729	0.0514428	0.0767695	0.068732	0.0457823	0.0988158	0.045189	0.0730536	0.063546	0.100419	0.0988933	0.0537558	0.0655196	0.0713495	0.0182771	0.0329157	0.083412	0.0332522	0.0369532	0.0583201	0.0549427	0.0283596	0.0462452	0.0742906	0.0229517	0.0631774	0.0403822	0.0381438	0.0793841	0.082354	0.028618	0.0653236	0.0357474	0.0331283	0.0745541	0.0633097	0.122562	0.0372159	0.0682303	0.059607	0.0580998	0.0232849	0.00363649		575.255	0.320072
		575.646	0.0323797	0.0235032	0.0608522	0.116098	0.0699756	0.0374995	0.103175	0.0455797	0.0850889	0.0595245	0.10717	0.105612	0.0494175	0.0590805	0.0776581	0.0362482	0.0402522	0.0981787	0.0456368	0.0472634	0.0471202	0.0744481	0.0332844	0.0479087	0.0730309	0.0258548	0.0542292	0.0342175	0.0351162	0.0946615	0.0470883	0.0206549	0.0633642	0.0385921	0.0332599	0.0732906	0.0567598	0.117913	0.0282319	0.0667829	0.0570674	0.0590993	0.0264208	0.00412623		575.646	0.307583
		576.037	0.0308795	0.0259475	0.0519077	0.09009	0.0738834	0.0354554	0.0950673	0.0258656	0.081907	0.0634371	0.0959666	0.0898927	0.046243	0.0707934	0.091559	-0.000418483	0.0268903	0.0939466	0.0331721	0.0354286	0.0680487	0.0428146	0.0478042	0.0386725	0.0586917	0.0250704	0.05459	0.0352255	0.0257976	0.0869899	0.0428618	0.0252728	0.0687245	0.0453802	0.0394912	0.0747035	0.0433971	0.11974	0.0234966	0.0678033	0.0527564	0.0547621	0.0264531	0.00413128		576.037	0.320271
		576.428	0.0349151	0.0369273	0.0503783	0.106221	0.068963	0.0464378	0.07315	0.0210097	0.072975	0.0604254	0.0955017	0.103766	0.0500136	0.0585795	0.075551	0.00250964	0.0320668	0.0765002	0.0351323	0.0352111	0.0451479	0.0583904	0.0356484	0.04812	0.0617334	0.0226128	0.0529783	0.0373324	0.0294997	0.0791753	0.0442728	0.0232061	0.0479433	0.035325	0.0305072	0.0697035	0.0521104	0.112585	0.0295115	0.0558471	0.056281	0.0527846	0.0241027	0.00376421		576.428	0.306811
		576.819	0.0229588	0.013309	0.0603561	0.115919	0.0758603	0.0318157	0.092949	0.0185496	0.0631412	0.0726695	0.0965311	0.0944102	0.0460056	0.0686711	0.0880508	0.0462365	0.0382352	0.0681372	0.0262691	0.0249069	0.046949	0.0693969	0.0313066	0.0311593	0.0702116	0.0197573	0.0582474	0.0330521	0.0304089	0.096434	0.0664357	0.024349	0.0489039	0.0390081	0.0412224	0.0785666	0.0546445	0.0979868	0.0268735	0.0603922	0.0540329	0.0547395	0.0261272	0.00408039		576.819	0.366396
		577.21	0.0318945	0.0436469	0.0551293	0.114206	0.0759326	0.054218	0.100346	0.0121641	0.0754772	0.0649957	0.0922006	0.0847063	0.0531408	0.0664425	0.0860867	0.018048	0.035572	0.0536367	0.0287806	0.0243753	0.0508511	0.0624171	0.0391469	0.0479083	0.0638254	0.0190067	0.047943	0.0462135	0.0306311	0.0826436	0.0715158	0.0224177	0.0552298	0.0357793	0.0388758	0.0732488	0.0568986	0.12506	0.0278384	0.0717249	0.0542281	0.0559611	0.0257454	0.00402076		577.21	0.34961
		577.601	0.0334271	0.0312785	0.0573442	0.114731	0.0760395	0.0462476	0.0964459	0.0157348	0.0749554	0.0682541	0.0958656	0.094763	0.0526776	0.0722379	0.073307	0.000677917	0.0327232	0.103135	0.0371479	0.0274615	0.0473488	0.0674551	0.0408993	0.0424437	0.0633919	0.0185488	0.0528675	0.0285126	0.0281843	0.0698479	0.0508539	0.0237807	0.047981	0.0388462	0.0297902	0.0738125	0.0476131	0.116416	0.0245115	0.029876	0.0559547	0.0537412	0.0274589	0.00428836		577.601	0.362522
		577.993	0.00773785	0.0163455	0.0513143	0.0820885	0.0693972	0.0473965	0.086054	-0.0614539	0.0670871	0.0510028	0.0917864	0.0898828	0.0425801	0.0483361	0.0815507	-0.068594	0.0366589	0.0636602	0.0148412	0.0345661	0.0546731	0.06325	0.0449542	0.0252848	0.0523129	0.0171392	0.0570356	0.0260847	-0.00291124	0.0562252	0.0538257	0.0236356	0.0561458	0.0418125	0.0293546	0.0655652	0.0513643	0.112782	0.0330881	0.0480949	0.0492609	0.044176	0.0343391	0.00536287		577.993	0.370736
		578.384	0.0295443	0.0283732	0.0525123	0.0856813	0.0622773	0.0400485	0.0741838	0.0307231	0.0626586	0.0644414	0.100056	0.0836583	0.042356	0.0675435	0.0664722	0.0226055	0.0307282	0.0796416	0.0331745	0.0276472	0.064853	0.0514273	0.0386783	0.0252616	0.0708043	0.0244418	0.0511932	0.0297788	0.025074	0.0833193	0.0600187	0.0223138	0.06047	0.0391155	0.0467872	0.0637012	0.051834	0.121535	0.0330973	0.0716638	0.0546499	0.0530328	0.0230608	0.00360149		578.384	0.363976
		578.775	0.0343876	0.0107741	0.0514965	0.0913509	0.0693614	0.0353628	0.0875557	0.0145538	0.0643727	0.0672082	0.0894579	0.105787	0.0439672	0.0582738	0.0749561	0.017289	0.0356082	0.0785425	0.0300087	0.0231345	0.0501726	0.0497815	0.0326514	0.0287518	0.0687417	0.0250514	0.05241	0.0364784	0.0388195	0.0837299	0.0465037	0.0278341	0.0644251	0.0400029	0.0427763	0.0617299	0.0558849	0.107141	0.023826	0.0619053	0.0526579	0.0520665	0.0241947	0.00377858		578.775	0.399161
		579.166	0.0343005	0.0242361	0.0612377	0.102658	0.0569825	0.04347	0.0801145	0.0238214	0.0653488	0.0612727	0.0908448	0.0909429	0.0443657	0.0575611	0.0990155	0.0438414	0.0307645	0.0819041	0.0253139	0.0357099	0.0526186	0.0436219	0.0370537	0.0320427	0.0633066	0.01815	0.0563965	0.0348338	0.0336593	0.0895356	0.0799566	0.0235032	0.0509963	0.0394479	0.0490835	0.0732162	0.0437233	0.105439	0.0201477	0.0399311	0.0489972	0.0533992	0.024015	0.00375052		579.166	0.391489
		579.557	0.0370364	0.0253909	0.0554696	0.12905	0.0703106	0.0428397	0.0856583	0.0256091	0.0641935	0.0558344	0.0918241	0.0892585	0.0430871	0.0566131	0.0591484	0.0221802	0.0248637	0.0661623	0.0292755	0.030564	0.0472847	0.0537289	0.0569636	0.0307469	0.0507902	0.0194995	0.0525311	0.0362537	0.0271359	0.0788952	0.0591079	0.024853	0.0566218	0.0324117	0.0347493	0.0617116	0.0599019	0.100055	0.0329179	0.0617441	0.0518593	0.052052	0.0235739	0.00368163		579.557	0.420415
		579.948	0.0298034	0.03213	0.0484575	0.0992295	0.0598424	0.0451474	0.0752748	0.00699039	0.0617907	0.0534828	0.0999242	0.0925845	0.0514563	0.0518645	0.080649	-0.017398	0.0301558	0.0484438	0.0272319	0.0269959	0.0530779	0.042511	0.0472498	0.0245343	0.0512161	0.0217309	0.045715	0.030677	0.024893	0.0557187	0.0616273	0.0218984	0.0558274	0.0397576	0.0318537	0.0738799	0.0476028	0.115822	0.0258774	0.0639615	0.0468154	0.0484464	0.0255272	0.00398668		579.948	0.417123
		580.339	0.0400429	0.0333717	0.0476252	0.108948	0.0728484	0.0417076	0.085692	0.0114141	0.0572496	0.0566774	0.0901505	0.08995	0.0441711	0.055409	0.0772693	0.0140028	0.0310941	0.0706255	0.0268569	0.0299908	0.0507019	0.0503435	0.0400687	0.036343	0.0617133	0.0192521	0.0600592	0.0390287	0.0199034	0.0735852	0.0484307	0.0207278	0.044105	0.041008	0.0296981	0.0646893	0.0505884	0.115786	0.0285312	0.0639237	0.0495935	0.0510531	0.0241585	0.00377293		580.339	0.439917
		580.73	0.0371678	0.0378014	0.0489122	0.124005	0.077874	0.0499159	0.0884508	0.0393689	0.0525564	0.0616215	0.0900449	0.0925533	0.0419781	0.0504494	0.0756885	0.0532282	0.0280968	0.074039	0.0360362	0.0299065	0.0448015	0.0425316	0.0561263	0.0368418	0.0591142	0.0244436	0.0474232	0.0330165	0.0182192	0.0781329	0.0424986	0.0262828	0.0523075	0.0409133	0.0415831	0.0682455	0.0555409	0.117394	0.0322817	0.0559572	0.0532502	0.0540634	0.0234777	0.0036666		580.73	0.448857
		581.121	0.041169	0.0273836	0.0424175	0.100634	0.0599828	0.0459343	0.0789409	0.0158576	0.069793	0.0575557	0.0866825	0.0825976	0.0478436	0.0614875	0.0875887	0.0153807	0.0397048	0.0866592	0.0295066	0.0332196	0.0437223	0.0360012	0.04441	0.0313108	0.0597842	0.0260521	0.0527609	0.0225526	0.0289248	0.0844507	0.0511342	0.0271069	0.0530319	0.0383632	0.036689	0.0548086	0.0502667	0.109248	0.0366844	0.050937	0.051879	0.0512307	0.0227737	0.00355665		581.121	0.470163
		581.512	0.0247958	0.026148	0.0385039	0.100898	0.0517367	0.0435992	0.0828324	0.0334375	0.0682718	0.0607442	0.091077	0.0830807	0.0440031	0.0669448	0.0666276	0.021689	0.0362921	0.0592779	0.0241036	0.0172016	0.0451122	0.0534007	0.0436485	0.027489	0.0531413	0.01965	0.0486823	0.037082	0.0347632	0.0615205	0.0449581	0.0256519	0.0601287	0.0298152	0.0315074	0.055785	0.0559678	0.1067	0.0300346	0.0494305	0.0471366	0.0488505	0.0216005	0.00337342		581.512	0.500289
		581.903	0.0310454	0.0497393	0.0495314	0.0772196	0.0612686	0.051146	0.0750797	0.0421977	0.0771051	0.0633496	0.0811874	0.0847593	0.0413087	0.0605306	0.0623732	0.0380384	0.0294355	0.0967904	0.0316306	0.034015	0.0451446	0.0520177	0.0438588	0.0281413	0.0617396	0.0179413	0.043911	0.0319689	0.0285787	0.0842797	0.0648236	0.0199592	0.063722	0.0355805	0.0272864	0.0702163	0.0573398	0.0908473	0.0306261	0.0490061	0.0443093	0.051928	0.0202586	0.00316386		581.903	0.460627
		582.294	0.0466379	0.0237779	0.0390862	0.0687061	0.0636927	0.0442137	0.0786605	0.0129934	0.0683042	0.0468283	0.0832968	0.0726418	0.0408759	0.0650556	0.0657385	0.026118	0.0323607	0.0743936	0.0247603	0.0410467	0.0438896	0.0568864	0.0391816	0.0268511	0.0559174	0.0223928	0.0497383	0.0305385	0.0246747	0.0782177	0.0461155	0.0222989	0.0485087	0.0414551	0.0377494	0.0565607	0.0540097	0.102548	0.0262948	0.0464614	0.0524048	0.0483386	0.0197201	0.00307976		582.294	0.522824
		582.686	0.0403761	0.0173433	0.0456989	0.105431	0.0538508	0.0442733	0.0860548	0.0106165	0.0813571	0.0614607	0.0851024	0.0813483	0.0452581	0.0641974	0.0673104	0.0285184	0.0228828	0.0854114	0.0245705	0.0333568	0.0506205	0.0687233	0.043795	0.029912	0.0689935	0.0223804	0.0481273	0.0164534	0.027918	0.0892761	0.0559964	0.026295	0.0493355	0.0361412	0.0410028	0.0574061	0.0488545	0.111012	0.0301026	0.0589412	0.0556344	0.05174	0.0244379	0.00381655		582.686	0.506581
		583.077	0.024287	0.0514933	0.047756	0.104762	0.0562469	0.0318106	0.0721803	0.0442357	0.0649639	0.0553795	0.0856698	0.0850415	0.0456914	0.0345906	0.0539586	0.0331118	0.026415	0.081188	0.0253469	0.0228157	0.0455771	0.0640618	0.0379181	0.0304444	0.0587263	0.0228973	0.0488054	0.0360072	0.0290371	0.0690844	0.0648022	0.026204	0.03938	0.033425	0.0291975	0.0570455	0.0414038	0.0946314	0.0221802	0.0470118	0.0479225	0.0486026	0.0207973	0.00324799		583.077	0.5542
		583.468	0.0212161	0.0330393	0.0481944	0.0872354	0.06793	0.0555038	0.0812963	0.010226	0.0596882	0.0552295	0.0828043	0.0760568	0.0394653	0.0614126	0.0640679	0.0217612	0.0255705	0.0732349	0.0260639	0.0203926	0.0540116	0.0398221	0.0441144	0.0322227	0.0590873	0.0193435	0.0467668	0.0287348	0.031635	0.0792246	0.0428432	0.0236121	0.0490639	0.03711	0.026913	0.0650418	0.0497524	0.103217	0.0239582	0.0590541	0.0468948	0.0481174	0.0217499	0.00339676		583.468	0.549062
		583.859	0.0325429	0.042168	0.0512618	0.100868	0.0636074	0.0367483	0.0730844	0.0137279	0.0528113	0.059954	0.0859741	0.079885	0.0477159	0.0461307	0.0580737	-0.00491452	0.0349721	0.0638644	0.0312706	0.0299943	0.0500866	0.0558046	0.0424916	0.0439308	0.0605816	0.0261258	0.046081	0.0316697	0.0130257	0.0664853	0.052553	0.0226231	0.0510588	0.0334537	0.0449859	0.061294	0.0479173	0.103743	0.0268844	0.0579001	0.0434504	0.0483387	0.021601	0.00337351		583.859	0.575278
		584.25	0.0381755	0.0257327	0.0489112	0.09102	0.060087	0.0376611	0.075494	0.0129988	0.068806	0.0544909	0.0841414	0.0771673	0.0435481	0.0573681	0.0725141	-0.00946687	0.025012	0.0590826	0.0339375	0.0260253	0.0537512	0.0508222	0.0359795	0.0305795	0.0541735	0.0163019	0.0469408	0.0316551	0.0244809	0.0548823	0.0615384	0.0270542	0.0482621	0.0338657	0.0251311	0.0579546	0.0501788	0.0945033	0.0241904	0.0564411	0.0454084	0.0465074	0.0216503	0.00338121		584.25	0.586355
		584.641	0.0405033	0.0232423	0.0498905	0.0698998	0.0620614	0.0414318	0.0792478	0.0130462	0.0564081	0.0520098	0.0813338	0.0805472	0.0419402	0.0557405	0.0700975	0.0101696	0.0251483	0.0806701	0.0254151	0.0265171	0.049293	0.039843	0.042241	0.0242662	0.0528189	0.0161705	0.0478492	0.0334354	0.0225691	0.0730791	0.0515808	0.0266933	0.0423553	0.0316195	0.0325671	0.0581959	0.0512118	0.110355	0.0189768	0.0410997	0.0463879	0.0462909	0.0217497	0.00339673		584.641	0.605383
		585.032	0.034187	0.0400241	0.0428028	0.11638	0.0596339	0.0439759	0.0863775	0.0076845	0.0656558	0.0542703	0.0768459	0.0922127	0.0526432	0.0525195	0.0784819	0.0246002	0.0239	0.0726079	0.0271843	0.0315428	0.0395306	0.0406632	0.0455754	0.0321811	0.0500295	0.0219463	0.0518931	0.0219884	0.0230399	0.0724419	0.0498278	0.0217353	0.0415303	0.031907	0.0209661	0.0505653	0.0479431	0.0918056	0.0311571	0.0453358	0.0495451	0.0479302	0.0229921	0.00359077		585.032	0.619754
		585.423	0.0387709	0.0204041	0.0385223	0.0974535	0.0588834	0.0372531	0.0754408	0.062911	0.0585213	0.0519732	0.0958904	0.082971	0.0407291	0.0465547	0.0719887	0.000678106	0.0339596	0.0792119	0.0247428	0.0259447	0.0435423	0.0353907	0.0290467	0.0353874	0.0408922	0.0184274	0.0539436	0.0342032	0.0256718	0.0571373	0.0723615	0.0258052	0.0585604	0.0430047	0.0498639	0.0503921	0.0328679	0.0938246	0.0181074	0.0617032	0.0422979	0.0479326	0.0223099	0.00348423		585.423	0.61328
		585.814	0.0339064	0.0635347	0.0600028	0.115528	0.0515256	0.0399253	0.0842073	0.0475095	0.0633211	0.0540282	0.079557	0.0767584	0.0492522	0.0478925	0.122599	0.0275588	0.0252305	0.0751156	0.0321388	0.0469789	0.0403813	0.100347	0.0372047	0.0239186	0.0533163	0.0191828	0.0571394	0.0383306	0.019925	0.0643205	0.104004	0.0259975	0.0623007	0.0313212	0.0480095	0.0643563	0.0371605	0.106416	0.0226194	0.0604794	0.0466697	0.0551213	0.0262845	0.00410495		585.814	0.663569
		586.205	0.027629	0.0341347	0.045867	0.08245	0.060237	0.0466348	0.0767287	0.0203987	0.0699776	0.0559039	0.071154	0.0775943	0.0481186	0.0506728	0.0826505	0.0192644	0.0340504	0.0545675	0.0234632	0.0263697	0.0433821	0.052923	0.0377905	0.0338246	0.0515197	0.0156613	0.0535651	0.0345426	0.0202687	0.0795701	0.0587475	0.0213014	0.0453963	0.0368012	0.0411049	0.055423	0.0355715	0.122784	0.024666	0.0493798	0.0473209	0.0480344	0.0218531	0.00341287		586.205	0.68587
		586.596	0.0410883	0.0262721	0.0471982	0.0990519	0.0539777	0.0480587	0.0708279	0.0269193	0.0508451	0.0449438	0.0759304	0.0690086	0.0421423	0.0509477	0.0680065	0.01685	0.0291606	0.0496576	0.0263106	0.0318245	0.0425105	0.0559586	0.0405007	0.0280175	0.0398121	0.0205114	0.044791	0.0313397	0.0210977	0.059927	0.0577579	0.0274648	0.0595013	0.0378362	0.0317089	0.0688931	0.0375935	0.103475	0.0226639	0.0400474	0.0433077	0.0459448	0.0194998	0.00304536		586.596	0.674849
		586.987	0.0417105	0.0399075	0.0551579	0.095076	0.0555307	0.0285396	0.0607201	0.0245275	0.0601898	0.0431318	0.0867049	0.0674205	0.0412	0.052679	0.0571836	0.0227157	0.027665	0.0625376	0.0203355	0.021002	0.0428897	0.0407558	0.0328535	0.0315765	0.0466881	0.017071	0.0383266	0.030321	0.0201414	0.0748602	0.0536272	0.0270031	0.0527888	0.0393073	0.0335181	0.0560469	0.0399942	0.0914599	0.0273465	0.0546278	0.0438279	0.0453407	0.0190731	0.00297871		586.987	0.685193
		587.378	0.0388553	0.040721	0.0472292	0.0873716	0.0571108	0.038196	0.062838	0.0102949	0.0587954	0.0509569	0.0711096	0.067129	0.0362513	0.0434509	0.057907	0.0106755	0.0222475	0.0606201	0.0207847	0.0275963	0.0466463	0.0557254	0.0368036	0.0279577	0.052138	0.0215034	0.0462603	0.0350402	0.0267222	0.0626368	0.038377	0.0240431	0.044208	0.0365815	0.0302645	0.063209	0.0402349	0.0991825	0.0257368	0.057053	0.0472354	0.0445781	0.0187694	0.00293129		587.378	0.712006
		587.77	0.0387276	0.037663	0.0432883	0.074647	0.0509123	0.0387921	0.0690813	0.0118727	0.0637231	0.0485589	0.0664408	0.071646	0.0361635	0.0574497	0.0573255	0.0231979	0.0394064	0.0513822	0.0274969	0.0329221	0.0389006	0.0402458	0.0485443	0.0345649	0.047679	0.0135631	0.0521132	0.0279161	0.0228073	0.0754752	0.0484387	0.0235911	0.0530879	0.0343327	0.0302355	0.0547432	0.0375828	0.0869618	0.0275384	0.0413157	0.0431689	0.0444757	0.0168729	0.0026351		587.77	0.733591
		588.161	0.0371044	0.0358876	0.0453626	0.0736592	0.0540369	0.0545319	0.0676768	0.0443593	0.0522317	0.0552482	0.0716705	0.0758018	0.0417209	0.0563683	0.0389652	0.0456542	0.0354432	0.0652564	0.0290309	0.0220635	0.0453567	0.0432498	0.0279445	0.0266252	0.0468765	0.0120522	0.0384035	0.0213967	0.0298515	0.067939	0.0384566	0.0301535	0.0519756	0.0337881	0.0257984	0.048063	0.0544017	0.0899649	0.0272302	0.0387308	0.0401739	0.0448904	0.0166102	0.00259408		588.161	0.72269
		588.552	0.0307793	0.018683	0.042963	0.0850569	0.0497122	0.0424911	0.0665994	0.0207053	0.0548677	0.0541512	0.0802012	0.0681027	0.040705	0.039578	0.0856429	0.0371128	0.0288582	0.0421348	0.0306769	0.0339865	0.0460759	0.0527988	0.0304915	0.0288825	0.0550688	0.0178296	0.0433489	0.0388436	0.0289195	0.0570199	0.0302579	0.0237088	0.0367105	0.0395985	0.0413493	0.0538001	0.0477858	0.0926059	0.0282225	0.0573669	0.0364081	0.0448805	0.018049	0.00281879		588.552	0.69015
		588.943	0.0422277	0.00487911	0.0441788	0.092754	0.0467446	0.0447061	0.0773383	0.0141387	0.0499427	0.0529965	0.0893314	0.0736845	0.0459746	0.0598516	0.0613695	0.0292568	0.0240975	0.0808672	0.024635	0.0190854	0.0308725	0.0388344	0.0330036	0.0326488	0.0479767	0.0179541	0.0417192	0.0249476	0.0334156	0.0667941	0.0402785	0.0262738	0.044758	0.0374308	0.0386026	0.0560265	0.0513125	0.0914336	0.0192031	0.0559452	0.04929	0.0452873	0.0210741	0.00329121		588.943	0.743756
		589.334	0.0362152	0.0183818	0.0515502	0.0867601	0.0540998	0.0560338	0.0819115	0.0330377	0.0572282	0.0498649	0.0787881	0.071772	0.0377814	0.0477089	0.0515487	0.0284703	0.0286307	0.0365372	0.0253478	0.0328686	0.0351701	0.0582161	0.0297254	0.0261223	0.0421841	0.0178014	0.0516501	0.035353	0.0320889	0.0636588	0.0337196	0.0287998	0.0500737	0.0397157	0.0112041	0.0624541	0.0551492	0.100593	0.0256982	0.0529766	0.0418064	0.0453341	0.0193486	0.00302174		589.334	0.766181
		589.725	0.0429197	0.0158169	0.0425109	0.0785682	0.0540019	0.0536997	0.0747562	0.0293857	0.0547204	0.0491166	0.0683749	0.0617639	0.0411137	0.0377965	0.0808218	0.0396471	0.0168057	0.0824612	0.0192406	0.0275404	0.0380129	0.0473353	0.0372346	0.0279679	0.0353089	0.0172717	0.0562012	0.0281866	0.0303487	0.0563944	0.0482514	0.0269199	0.0587408	0.0337459	0.0203392	0.0474457	0.0358676	0.0982802	0.0208404	0.0617236	0.0430133	0.0448901	0.0196528	0.00306924		589.725	0.773663
		590.116	0.0519501	0.0210706	0.0403353	0.0735335	0.0503965	0.0435302	0.0683712	0.020253	0.0450372	0.0397057	0.0784999	0.0653616	0.038063	0.0465365	0.0533134	0.0249443	0.0275261	0.072144	0.0272894	0.0215984	0.0420594	0.0434776	0.0385181	0.0310809	0.0451839	0.0154757	0.0459473	0.0361306	0.0239347	0.0538407	0.0414092	0.0266971	0.0427172	0.0329363	0.0306144	0.0437753	0.0546561	0.0976685	0.0256541	0.0470319	0.0411117	0.0431556	0.0172394	0.00269235		590.116	0.78309
		590.507	0.0341529	0.0193657	0.0374598	0.076572	0.0524644	0.033892	0.0683665	0.0274037	0.0573544	0.0528586	0.0736833	0.0651293	0.0371305	0.0574597	0.069334	0.0196313	0.0222298	0.0784064	0.0238704	0.0262097	0.0450241	0.0556879	0.0390574	0.0271525	0.0551435	0.0183901	0.0486504	0.0303491	0.034387	0.0497427	0.0493941	0.0231003	0.0380934	0.0352769	0.0341225	0.0500715	0.0406836	0.0980508	0.0277055	0.0494877	0.0468293	0.0446189	0.0183259	0.00286202		590.507	0.75176
		590.898	0.0432496	0.0238768	0.0441529	0.0564544	0.0530117	0.0344776	0.0719862	0.00651623	0.0617613	0.0550524	0.0794482	0.0712454	0.0416057	0.0541829	0.0666191	0.0346789	0.0216663	0.059635	0.0199476	0.0277365	0.0369169	0.0273646	0.0464975	0.0261498	0.0456416	0.0148729	0.0487855	0.0318924	0.0283067	0.04699	0.0492494	0.0239532	0.0396131	0.0345855	0.0212431	0.0579876	0.0330843	0.086414	0.0243401	0.0353742	0.0397957	0.0421064	0.017861	0.00278941		590.898	0.823341
		591.289	0.0343316	0.0315654	0.0501044	0.107006	0.0518902	0.0392402	0.0697962	0.0121919	0.061205	0.0616084	0.0730939	0.0690601	0.0419207	0.0522722	0.0623822	0.0268002	0.0302999	0.0613708	0.0249793	0.0193539	0.0523566	0.0461268	0.0374644	0.0364482	0.0475285	0.0201488	0.0431642	0.0315834	0.0285871	0.0721598	0.0497086	0.0247687	0.0455728	0.0324256	0.0312517	0.0522746	0.0453945	0.0904273	0.0256567	0.0582291	0.0398764	0.0461372	0.0194433	0.00303653		591.289	0.788468
		591.68	0.0421551	0.0547565	0.0319101	0.0722414	0.0458949	0.0429698	0.0655572	0.0348775	0.0543178	0.0478644	0.07978	0.0654058	0.0426165	0.0462059	0.0795124	0.0219798	0.0216272	0.0675226	0.0211569	0.0291269	0.044688	0.0800906	0.0359189	0.0273443	0.0517732	0.0214749	0.0396764	0.0389246	0.0144553	0.0615581	0.036885	0.0280657	0.0498499	0.0359091	0.0256447	0.048426	0.0408441	0.0875007	0.0207864	0.0522302	0.0440309	0.0452087	0.0182622	0.00285207		591.68	0.859638
		592.071	0.0344339	0.030442	0.0411737	0.0747916	0.0436305	0.0370058	0.0626768	0.00681112	0.0583313	0.0470025	0.0722376	0.0653662	0.0411947	0.0524692	0.0738504	0.0262615	0.0238447	0.0586031	0.0224792	0.0281256	0.0418369	0.0625631	0.0312731	0.0259273	0.0465352	0.0215782	0.0440216	0.0319848	0.0264846	0.0721536	0.045446	0.0325054	0.0446425	0.0403993	0.0289456	0.0555022	0.0413549	0.0856814	0.0259708	0.0473495	0.0434343	0.0438127	0.0173046	0.00270252		592.071	0.802397
		592.463	0.042426	0.0178302	0.0371063	0.0714715	0.0477372	0.0438304	0.0695152	0.01866	0.0525307	0.055529	0.0770361	0.0637397	0.0429416	0.0444067	0.0733754	0.000739005	0.0284103	0.0622255	0.0184657	0.0240974	0.0439133	0.0455446	0.0253102	0.0333048	0.045825	0.0172701	0.0489703	0.0277474	0.0326034	0.0602758	0.028622	0.0302138	0.035686	0.0321229	0.0260279	0.0532302	0.0424683	0.0866914	0.031342	0.0477654	0.0357603	0.0420188	0.0182537	0.00285076		592.463	0.82871
		592.854	0.0425455	0.018061	0.0392138	0.0927729	0.0455919	0.047518	0.0642671	0.040294	0.0484021	0.0420825	0.0763235	0.0717519	0.0429569	0.0567637	0.0579909	0.0135005	0.0281149	0.0638567	0.0252278	0.0200409	0.0476804	0.0398325	0.0307002	0.0253583	0.0505936	0.016477	0.0479534	0.0210798	0.0357068	0.0636276	0.0373711	0.027093	0.039011	0.0334858	0.0259094	0.0487901	0.0397688	0.0826449	0.0248973	0.037426	0.0410872	0.0427749	0.0179771	0.00280755		592.854	0.884643
		593.245	0.0322662	0.0259488	0.0375058	0.0969556	0.0455385	0.0559077	0.0607159	0.0143705	0.0515759	0.0510923	0.0657393	0.0647782	0.0404067	0.0433028	0.0559489	0.0150606	0.0235431	0.0561008	0.0157994	0.0241473	0.0415937	0.0380624	0.0305076	0.027007	0.0420906	0.01965	0.0470895	0.0300358	0.00913602	0.0527641	0.0577249	0.0275325	0.0434797	0.0329082	0.011952	0.0457542	0.0448613	0.0811655	0.0207574	0.031718	0.0451651	0.0404307	0.0185721	0.00290048		593.245	0.84104
		593.636	0.0336547	0.0207	0.0464099	0.0712357	0.0511912	0.0423507	0.0596615	0.0160456	0.0573966	0.0458694	0.0640664	0.0682675	0.0396103	0.0391843	0.0555684	0.0205823	0.0320186	0.0552263	0.0203568	0.0249984	0.0431845	0.0404166	0.0354151	0.0225635	0.0383309	0.0210238	0.0545711	0.0284278	0.0282897	0.0566094	0.0395215	0.028539	0.036478	0.0320646	0.0283418	0.0410452	0.0428043	0.0893334	0.0217819	0.0434386	0.042446	0.0409517	0.015864	0.00247754		593.636	0.860856
		594.027	0.0447022	0.0327417	0.0402672	0.079827	0.0383761	0.0324888	0.0587069	0.00609731	0.054994	0.0470537	0.0631582	0.0610568	0.0428922	0.0380179	0.0607402	0.00581243	0.0305337	0.0578757	0.021321	0.0260107	0.0483102	0.0445196	0.0261046	0.0257827	0.0438579	0.0184684	0.049571	0.0295134	0.0319152	0.0415492	0.0413395	0.0302755	0.0315561	0.0297776	0.0366605	0.0464304	0.0454328	0.086452	0.0271935	0.0355654	0.0405458	0.0403292	0.0163519	0.00255373		594.027	0.883234
		594.418	0.0369453	0.0362449	0.0383079	0.106385	0.0510555	0.0542812	0.0680239	0.0229643	0.0576481	0.0444276	0.0651798	0.0626029	0.0344901	0.0489031	0.0370944	0.0168498	0.0150918	0.0579076	0.0184449	0.0264982	0.0343678	0.0473233	0.0206969	0.0286693	0.0418992	0.0214549	0.0399052	0.0297219	0.0284518	0.0572163	0.0332698	0.0309347	0.0381199	0.0303026	0.0234734	0.0497424	0.0479564	0.0954813	0.0205022	0.0528397	0.0435742	0.0418354	0.0192395	0.00300471		594.418	0.885685
		594.809	0.0327856	0.0372462	0.0471089	0.0724438	0.0536721	0.044732	0.0597259	0.00392182	0.058658	0.0521055	0.0578455	0.0563309	0.0427123	0.0478382	0.0334495	0.00759765	0.0185086	0.037099	0.0287759	0.0286831	0.0456675	0.0544777	0.0328622	0.0284373	0.0374777	0.0207147	0.0537807	0.0299972	0.029421	0.0653907	0.0478679	0.0336882	0.0423742	0.0345522	0.0193084	0.0403903	0.0436024	0.0876985	0.0291218	0.0482334	0.038996	0.0411049	0.0162829	0.00254296		594.809	0.86351
		595.2	0.0494959	0.0126323	0.0489561	0.0645438	0.0432077	0.0556739	0.068136	0.0130191	0.0607328	0.0445996	0.0631362	0.063079	0.0382703	0.0382384	0.0547664	-0.000653492	0.0256531	0.0556261	0.0209943	0.0244786	0.042116	0.0439743	0.0329623	0.0237111	0.0425485	0.0154653	0.0477986	0.0342116	0.0285377	0.0595903	0.047595	0.0271604	0.0475876	0.0326144	0.0235842	0.0486579	0.0428419	0.0716954	0.0234194	0.0460895	0.0412316	0.0406824	0.0165901	0.00259094		595.2	0.956708
		595.591	0.0452199	0.0145636	0.0358439	0.0714677	0.0454045	0.059078	0.067295	-0.00155608	0.0484609	0.0493321	0.0631732	0.0616518	0.0358338	0.0568024	0.0444065	0.0169404	0.0174008	0.0582306	0.0275666	0.0378612	0.0405052	0.0351174	0.0346362	0.0275423	0.040745	0.0163274	0.0465277	0.0262299	0.0191631	0.0586526	0.0437826	0.0344661	0.0409846	0.0398099	0.0268846	0.0549584	0.0376187	0.0808337	0.0252601	0.0494565	0.0422678	0.0408963	0.0169226	0.00264287		595.591	0.97469
		595.982	0.0224147	0.0259819	0.0457134	0.0651458	0.0417355	0.053402	0.0626534	0.0213087	0.056192	0.0389445	0.0672273	0.063595	0.0389733	0.0494709	0.0570457	0.0232625	0.0176775	0.0410914	0.0251556	0.0220996	0.0509406	0.0429395	0.0365771	0.0233403	0.0412212	0.0222812	0.0392154	0.0263344	0.0300941	0.068318	0.0370452	0.0341978	0.0554302	0.0338603	0.0332562	0.050289	0.0432564	0.0802982	0.0281737	0.0488785	0.0420308	0.0416358	0.0152352	0.00237934		595.982	0.930169
		596.373	0.0543678	0.0373008	0.0418642	0.0701223	0.0512749	0.0524394	0.0641053	0.00713675	0.0570694	0.0485855	0.0543294	0.0608228	0.0350618	0.0582161	0.0674912	0.00610342	0.0217029	0.0650137	0.0278414	0.020839	0.0460158	0.0398504	0.0420583	0.0256032	0.0384081	0.0238789	0.0472888	0.0205298	0.0274741	0.0707589	0.0515185	0.0333498	0.0429131	0.0279174	0.0364653	0.0489933	0.0495481	0.0727643	0.0315585	0.0372119	0.0371673	0.0427552	0.0165415	0.00258335		596.373	0.917581
		596.764	0.0336918	0.0122284	0.0427666	0.059544	0.0525461	0.0475898	0.0449441	0.00953552	0.0618799	0.0553498	0.0764433	0.058279	0.0349945	0.0492381	0.0450723	-0.00872875	0.0154532	0.0823175	0.0213217	0.0312448	0.0314742	0.0465406	0.0354892	0.0270141	0.0424404	0.0182708	0.0444922	0.0304059	0.0218374	0.044448	0.0388004	0.0317801	0.0352608	0.0341864	0.0141411	0.0591032	0.0413085	0.0731449	0.0251994	0.037594	0.039262	0.0389733	0.0183197	0.00286106		596.764	0.917964
		597.155	0.0320623	0.0429725	0.0389113	0.0593229	0.045457	0.0533371	0.0588842	0.0286504	0.0525984	0.057977	0.0590306	0.054423	0.0378251	0.0525789	0.0584051	0.0319158	0.0200951	0.0534402	0.0178749	0.0177395	0.0513074	0.0530065	0.025105	0.0219094	0.0342919	0.0186289	0.0462782	0.03384	0.0226814	0.0518823	0.0532462	0.0309796	0.0363633	0.0365272	0.0197606	0.0483361	0.0419909	0.0878638	0.0216545	0.0498392	0.0368983	0.0413632	0.0152998	0.00238942		597.155	1.01373
		597.547	0.0349578	0.0317662	0.0352611	0.0526074	0.0360292	0.0398684	0.0572543	-0.00822547	0.0530117	0.0509241	0.0662042	0.056994	0.0316234	0.0507645	0.04901	0.0152705	0.0281251	0.0426407	0.018488	0.0279786	0.0418069	0.0508555	0.0259617	0.02608	0.0420923	0.0170221	0.0458627	0.0323305	0.0218997	0.061802	0.0488782	0.0250871	0.0427045	0.0349806	0.0243812	0.0475666	0.0465398	0.0914871	0.0297142	0.0361422	0.0356459	0.0390096	0.0165134	0.00257897		597.547	0.952403
		597.938	0.0408526	0.0363938	0.0384557	0.0823825	0.0644431	0.0510067	0.0623845	0.0287892	0.0497209	0.0427203	0.0672211	0.0561494	0.0364218	0.0634327	0.0490803	0.018855	0.0242222	0.0982525	0.0213966	0.0372707	0.0475308	0.055337	0.0567019	0.0299019	0.0319974	0.017601	0.0452826	0.0248301	0.0196532	0.0457943	0.0334273	0.0309908	0.0364571	0.0391717	0.0223248	0.0435177	0.0411113	0.0818966	0.0234563	0.107471	0.0446058	0.0450857	0.0205407	0.00320792		597.938	0.968253
		598.329	0.0332346	0.0205556	0.0368963	0.0848239	0.0411518	0.0512561	0.0676085	0.0153649	0.0519778	0.0429804	0.0630308	0.0626522	0.0418095	0.0349383	0.0702355	0.00488649	0.0194604	0.0448991	0.021523	0.0171576	0.0542732	0.041174	0.0329078	0.023249	0.0405532	0.0211482	0.0590083	0.0261488	0.018964	0.0810821	0.0349468	0.0313751	0.0420906	0.0383441	0.0311692	0.0465665	0.0415089	0.0814134	0.0287124	0.0406223	0.0379287	0.0409666	0.0186333	0.00291003		598.329	0.970399
		598.72	0.0368966	0.0101715	0.036994	0.0569448	0.0533168	0.0509234	0.0549114	0.00759042	0.0626254	0.0399839	0.0678892	0.0611905	0.0423824	0.0396708	0.0670477	0.00556012	0.0162889	0.0471451	0.0226599	0.0192018	0.0347096	0.050332	0.0291878	0.0219871	0.0376715	0.0157411	0.046186	0.0289796	0.0302699	0.0464194	0.0330743	0.0407262	0.0377668	0.033386	0.0180318	0.0470975	0.0410965	0.077633	0.0250654	0.045526	0.0386014	0.0385094	0.0167123	0.00261002		598.72	0.960254
		599.111	0.037134	0.0194444	0.0460617	0.0746871	0.0433877	0.056834	0.0566214	-0.00497557	0.0614119	0.0465268	0.0572685	0.0586707	0.039393	0.036478	0.0581593	0.0149271	0.0262109	0.059856	0.0255563	0.0219317	0.0417568	0.0494097	0.036162	0.0235754	0.0408936	0.0212957	0.0476701	0.0272435	0.0251353	0.0777229	0.0282867	0.0315011	0.0416492	0.0397993	0.0245039	0.0454209	0.0428499	0.0855458	0.0250888	0.0360783	0.0368205	0.0405852	0.0177335	0.0027695		599.111	0.955095
		599.502	0.0384455	0.018579	0.039022	0.0536085	0.0452844	0.0594992	0.057612	0.0298465	0.052041	0.0497468	0.0632226	0.0549536	0.0397656	0.0339493	0.0576587	0.0286999	0.0241867	0.0438517	0.0220235	0.0151793	0.0361843	0.0400086	0.0373098	0.0213198	0.0416042	0.0211976	0.0472603	0.0216704	0.0269441	0.0529386	0.0360968	0.0283371	0.0469805	0.0291372	0.026004	0.047059	0.0497391	0.0751004	0.0201034	0.0392967	0.0355205	0.0391948	0.0138686	0.00216592		599.502	1.01169
		599.893	0.0417156	0.025715	0.0441296	0.0607407	0.0387346	0.0500015	0.0551582	0.00879175	0.0603178	0.0387198	0.062728	0.0534704	0.0385654	0.0523211	0.0490345	0.0219479	0.0155691	0.0794742	0.0289006	0.0329732	0.0421256	0.030005	0.0270999	0.0285974	0.0322489	0.0228963	0.0461267	0.0215542	0.0239873	0.0650589	0.0311453	0.0377289	0.0383147	0.028607	0.0259145	0.0448375	0.0460089	0.0817566	0.0151719	0.0512521	0.0382314	0.0399434	0.0163352	0.00255114		599.893	0.982879
		600.284	0.0517332	0.038876	0.04164	0.0518079	0.0423958	0.0398067	0.0603001	0.0155148	0.0573096	0.0469598	0.0645995	0.0564362	0.0346448	0.0420335	0.0580681	0.0172219	0.0266478	0.0612269	0.0257512	0.0236798	0.0408285	0.0335252	0.0233239	0.0231631	0.0392763	0.0169742	0.0368135	0.0275371	0.0277305	0.0514491	0.0298432	0.0319827	0.0390938	0.0328813	0.0166603	0.04514	0.0393492	0.0908315	0.0263227	0.0299577	0.0345631	0.0388756	0.0153973	0.00240465		600.284	1.01902
		600.675	0.0475452	0.0189439	0.0388836	0.0711259	0.0548367	0.0583974	0.0605052	0.0174892	0.0514398	0.044011	0.0622378	0.0539881	0.0357858	0.0497688	0.0544527	0.0179762	0.0236123	0.0448336	0.0278383	0.0250778	0.0393242	0.0295333	0.0273521	0.0200611	0.0360776	0.0204672	0.0437795	0.0248318	0.0210368	0.0510426	0.0346308	0.0283557	0.0337548	0.043588	0.031869	0.0433023	0.0351954	0.0686025	0.0247247	0.0406744	0.0378756	0.0388983	0.0142933	0.00223225		600.675	1.02362
		601.066	0.0358238	0.019538	0.0369067	0.0715009	0.0480417	0.0337069	0.0473467	0.0273757	0.0531519	0.0384173	0.062285	0.0495861	0.0357956	0.0458988	0.0507688	0.00769308	0.0248689	0.0509704	0.0236221	0.0220108	0.0460361	0.0341095	0.0304826	0.0236089	0.0385353	0.0229336	0.0437938	0.0296008	0.0292126	0.0696721	0.0444433	0.0341056	0.0333056	0.0352225	0.023588	0.0415761	0.0338691	0.0751715	0.0252321	0.055659	0.0354457	0.0388028	0.0144913	0.00226316		601.066	1.01557
		601.457	0.0307481	0.0326226	0.0429528	0.0753537	0.0571317	0.0536635	0.0471546	0.0171484	0.0473343	0.0453164	0.0556672	0.0625613	0.0357632	0.0583328	0.0468102	0.00695297	0.0165032	0.0696742	0.0228004	0.0179724	0.0485828	0.0349149	0.0344642	0.0216847	0.0397639	0.0175345	0.0438862	0.0219601	0.0172117	0.058335	0.0332419	0.0293283	0.0409477	0.024438	0.00981776	0.0462563	0.0458499	0.0716156	0.0220291	0.0666286	0.0415988	0.0393306	0.0175054	0.00273389		601.457	0.982564
		601.848	0.0463595	0.0307556	0.0392554	0.0792058	0.0375538	0.0469723	0.0564062	0.0194341	0.0552547	0.0386313	0.053651	0.0557835	0.0333225	0.0428239	0.0444586	-0.00417519	0.0163748	0.05701	0.0247556	0.00963088	0.0353075	0.0454828	0.0251651	0.0300052	0.0322435	0.020717	0.0450705	0.0227439	0.030138	0.0586515	0.033591	0.0339876	0.0406166	0.0318996	0.0273025	0.0483391	0.04523	0.0788417	0.0209126	0.0455968	0.0400285	0.0384228	0.0162921	0.0025444		601.848	0.980171
		602.24	0.0383039	0.0224751	0.0441036	0.119376	0.0653724	0.0413304	0.0533762	0.0146778	0.0528017	0.0441539	0.0731358	0.0570359	0.0446098	0.0419164	0.0658321	0.0305085	0.0169897	0.111661	0.021878	0.0210183	0.0369164	0.0464804	0.0595492	0.0292823	0.0361076	0.0243545	0.0468228	0.0321028	0.0191737	0.0673106	0.0340155	0.030561	0.0390751	0.0355501	0.0265343	0.0537263	0.0393665	0.0763094	0.0222966	0.0596266	0.04541	0.0449056	0.0223446	0.00348964		602.24	1.0177
		602.631	0.0402069	0.0251815	0.0407811	0.0609541	0.0348443	0.050883	0.056417	0.00318752	0.047543	0.0554289	0.056495	0.054166	0.0395003	0.0442765	0.0617178	-0.00626121	0.0199295	0.0531644	0.0223091	0.0222957	0.0306361	0.0184406	0.0294632	0.0246737	0.0334184	0.0173409	0.0415825	0.0293827	0.0228294	0.0611253	0.039657	0.03085	0.0392324	0.0347207	0.0269439	0.0442771	0.0448065	0.0761182	0.0219472	0.0275257	0.03648	0.0369383	0.0164386	0.00256728		602.631	1.01198
		603.022	0.0423135	0.041632	0.0424273	0.062372	0.0457658	0.0469622	0.0540644	0.00906157	0.0562688	0.0481226	0.0621077	0.0532223	0.0413927	0.0349696	0.0375323	0.00694808	0.0239582	0.0394883	0.0236363	0.0177706	0.046133	0.0271319	0.0359214	0.0297301	0.0429976	0.019079	0.0381818	0.0241244	0.0185958	0.0531388	0.0329113	0.0301085	0.0394523	0.0317175	0.0228835	0.0427768	0.0382173	0.0809486	0.0229327	0.0366421	0.0381082	0.0376036	0.0146646	0.00229023		603.022	1.02469
		603.413	0.0403428	0.0109169	0.0389737	0.0724256	0.0427505	0.0559969	0.0530285	0.025814	0.0479648	0.0409559	0.0596096	0.0620921	0.0399447	0.0383533	0.0523493	-0.0174141	0.0159726	0.0501608	0.0192472	0.0302786	0.0326333	0.0438732	0.0391005	0.026165	0.0313581	0.0146458	0.0362612	0.018404	0.0267477	0.0598014	0.0471299	0.0341243	0.033529	0.0355633	0.0177275	0.0461395	0.0381791	0.0719176	0.0261941	0.0376076	0.0317545	0.0372834	0.0169783	0.00265156		603.413	0.99595
		603.804	0.0374711	0.0233234	0.0381467	0.0822541	0.0455132	0.0403459	0.0539415	-0.00115708	0.0427371	0.0472582	0.0532231	0.0537305	0.038627	0.0428149	0.0691816	-0.00446154	0.024471	0.0708843	0.0261838	0.0264259	0.0424411	0.0380923	0.0325865	0.0286949	0.0411626	0.0215971	0.0385979	0.0194695	0.027203	0.060122	0.0384409	0.0341961	0.0411073	0.0352921	0.0241213	0.0487462	0.0423698	0.0681532	0.0227614	0.046478	0.0354191	0.0389748	0.0170021	0.00265528		603.804	1.01961
		604.195	0.0347567	0.0342965	0.0398581	0.0775565	0.048043	0.0375741	0.0560371	0.00426909	0.0391037	0.0428509	0.0591352	0.0527804	0.0389451	0.0452096	0.0509856	0.0122981	0.0172191	0.0847333	0.0236601	0.0258019	0.044023	0.0288394	0.0511319	0.0249378	0.0328698	0.0200429	0.0409607	0.0199218	0.0191839	0.0698898	0.0243666	0.0298527	0.0352117	0.033078	0.0303443	0.0433866	0.043906	0.0697203	0.0231447	0.0611067	0.0367984	0.0392154	0.0173387	0.00270785		604.195	1.02982
		604.586	0.0439299	0.0291796	0.041038	0.0587815	0.0415501	0.0396246	0.0570097	0.0223895	0.0473764	0.0399399	0.0484411	0.056188	0.0389645	0.0370254	0.048151	0.0173276	0.024982	0.0658076	0.019527	0.0227229	0.0373228	0.02392	0.0220759	0.023136	0.0340233	0.022105	0.0453279	0.0270657	0.0273342	0.050988	0.0361768	0.0328398	0.0361072	0.0322598	0.0299997	0.0403617	0.0382142	0.0610633	0.0231045	0.0400995	0.0338836	0.0370089	0.0121212	0.00189302		604.586	1.03226
		604.977	0.0386782	0.0402907	0.0342675	0.0545804	0.0447869	0.0491606	0.050493	0.0115129	0.049188	0.0463195	0.0490433	0.0538464	0.0292337	0.0538381	0.0513216	0.00649981	0.0194187	0.0553982	0.0194257	0.0222172	0.034369	0.0124302	0.0257835	0.0225406	0.0361438	0.0160014	0.0419294	0.0226529	0.0195274	0.0406815	0.0173315	0.0315319	0.0436609	0.0311338	0.014417	0.0411423	0.0388902	0.0769164	0.0171347	0.0412895	0.0378089	0.0351912	0.0152412	0.00238027		604.977	1.04066
		605.368	0.0391649	0.0368623	0.0466741	0.0699861	0.0372351	0.0485321	0.0582722	0.0154826	0.0553279	0.0398953	0.0550263	0.0523154	0.0374617	0.041642	0.04461	0.0214745	0.015984	0.0423573	0.0158405	0.0196698	0.0335736	0.0336571	0.0308137	0.0296633	0.0270527	0.0179699	0.0451739	0.0207636	0.0284981	0.0603068	0.0378237	0.0363709	0.0497603	0.0301827	0.0264903	0.0456874	0.0432814	0.0669331	0.0245771	0.0471841	0.0358765	0.0381818	0.0137341	0.00214491		605.368	0.985278
		605.759	0.0349907	0.0253811	0.0339693	0.0671269	0.0383453	0.0440988	0.0520332	0.00761848	0.0542547	0.0412564	0.0525372	0.0452891	0.0414057	0.033249	0.0560033	0.0203487	0.016042	0.0446133	0.0203309	0.0182758	0.0377217	0.0416776	0.0286138	0.0203296	0.0346136	0.0154961	0.0390254	0.0241397	0.0196538	0.0469721	0.034206	0.0329964	0.0332103	0.0328723	0.0186288	0.0400827	0.0488065	0.07347	0.0221199	0.0441767	0.0308894	0.0357774	0.014099	0.00220189		605.759	0.937476
		606.15	0.0451141	0.0113476	0.0408779	0.0588912	0.0422453	0.0535254	0.047339	0.00885569	0.044302	0.0455291	0.0562327	0.054193	0.040702	0.0352946	0.0420407	0.0340377	0.025013	0.0651177	0.0143679	0.0181328	0.0429523	0.0389637	0.0295047	0.0249209	0.0328567	0.0204238	0.03261	0.0321743	0.0184156	0.0443279	0.0418942	0.0272123	0.0334202	0.0339863	0.0176792	0.0430325	0.0324867	0.0711321	0.0251541	0.0447168	0.0347417	0.036726	0.0139477	0.00217827		606.15	0.981696
		606.541	0.0362681	0.0176797	0.0366161	0.0524986	0.0429762	0.0414929	0.0578891	0.0049862	0.0416605	0.0437942	0.0619314	0.0466224	0.0332942	0.0409596	0.0421732	0.0278024	0.0278375	0.0448965	0.0124037	0.0219928	0.0347922	0.0361398	0.0219794	0.0281294	0.0328332	0.0175436	0.0396064	0.022204	0.0349771	0.0468126	0.0376488	0.0272418	0.027535	0.0371741	0.0246185	0.0357672	0.0345436	0.0754778	0.0257506	0.0293742	0.0284625	0.0349851	0.0130481	0.00203777		606.541	0.975974
		606.932	0.0434528	0.0277068	0.0384735	0.0596737	0.0348475	0.0464911	0.0534909	0.0311426	0.0490894	0.0426587	0.0480207	0.0475728	0.0297652	0.0373535	0.0434266	0.024314	0.0142241	0.0364568	0.0170061	0.040204	0.0365817	0.0444904	0.0292273	0.0230683	0.0372711	0.0163325	0.0362415	0.0232928	0.0134326	0.0578368	0.0345093	0.0266423	0.0421173	0.0310745	0.0142109	0.0394138	0.0479799	0.0634117	0.0252811	0.0476287	0.0356225	0.0363668	0.0124061	0.0019375		606.932	0.976586
		607.324	0.0464044	0.0147664	0.0387747	0.0333381	0.0430805	0.0288373	0.0582868	0.0310947	0.0464286	0.0443886	0.0524185	0.0482366	0.030563	0.0319162	0.0967569	0.0113094	0.0159066	0.0289156	0.02071	0.0155867	0.0409762	0.0230617	0.0178075	0.0237471	0.0257442	0.0196019	0.0486304	0.0253379	0.0146293	0.0572332	0.0236992	0.0312159	0.0386703	0.0280522	0.0290835	0.032793	0.049766	0.0562787	0.0161845	0.0405667	0.0314061	0.034444	0.0161646	0.00252448		607.324	0.91383
		607.715	0.0244891	0.0193106	0.0423485	0.075123	0.0475754	0.0439885	0.0502535	0.00464435	0.0427926	0.0474474	0.0485532	0.0470659	0.0382734	0.0408713	0.0292991	0.0251387	0.0198438	0.0382154	0.0158929	0.0163466	0.0386281	0.0330285	0.0360752	0.0192163	0.0288709	0.0180092	0.04244	0.0167039	0.0334679	0.0575186	0.0403777	0.0276732	0.0343683	0.0244651	0.0303821	0.0411029	0.0356801	0.0632253	0.0216489	0.0329361	0.0301516	0.0347181	0.0138212	0.00215851		607.715	0.995155
		608.106	0.0439214	0.0191426	0.0310463	0.0493678	0.0263872	0.0437513	0.0384438	0.0130915	0.0451089	0.0355661	0.0439876	0.0470017	0.034747	0.0453978	0.0489604	0.0231923	0.0150421	0.0466775	0.0205893	0.0255122	0.0374015	0.0376428	0.030055	0.0209526	0.0316548	0.0153201	0.0413387	0.0150216	0.0202103	0.0604061	0.0267443	0.0309964	0.0389288	0.0305385	0.0248892	0.0373857	0.0359077	0.0569143	0.0192561	0.0334148	0.027348	0.0333966	0.0117354	0.00183276		608.106	0.91914
		608.497	0.0432589	0.0295527	0.0383439	0.0587788	0.0468761	0.0579655	0.0444191	0.00696391	0.0568916	0.0376783	0.0500095	0.0459118	0.0305802	0.0416537	0.0447314	0.00983569	0.0120785	0.0569866	0.0183697	0.0233106	0.0342996	0.0221013	0.0295469	0.0280895	0.0320082	0.0162919	0.0348822	0.0250468	0.0233689	0.0436572	0.0356085	0.0282496	0.0391145	0.0262493	0.00632552	0.0436613	0.0366031	0.07268	0.0187169	0.0319004	0.0334643	0.0345381	0.0147353	0.00230126		608.497	0.94952
		608.888	0.0366994	0.0176058	0.0327772	0.0384577	0.0518275	0.0510782	0.0486528	-0.00697549	0.0446191	0.0340164	0.0509245	0.0488067	0.0302075	0.03757	0.0530528	0.0184351	0.0189835	0.0410753	0.0234087	0.0116657	0.0430407	0.0320029	0.0264843	0.0198304	0.0286448	0.0182992	0.0400867	0.0233809	0.0155432	0.0530329	0.0368425	0.0300857	0.0467697	0.0282507	0.0314548	0.0448609	0.0476382	0.0657889	0.0211884	0.0395194	0.029602	0.034274	0.0141078	0.00220327		608.888	0.987919
		609.279	0.0298051	0.00482604	0.0340777	0.0545932	0.0412541	0.045942	0.0436093	0.000603176	0.0324959	0.0302786	0.0542258	0.0481813	0.035235	0.0357019	0.0478907	0.0262233	0.020298	0.0513922	0.0190886	0.0129546	0.0339936	0.0299861	0.0338844	0.0231081	0.0294777	0.0157909	0.0352601	0.0192843	0.0325432	0.0536213	0.0323473	0.029333	0.0319274	0.033303	0.0289727	0.0381132	0.040817	0.0632832	0.0143063	0.0353407	0.030601	0.0330237	0.0132195	0.00206454		609.279	0.92186
		609.67	0.0491432	0.0237226	0.0256287	0.0380772	0.0437773	0.0414879	0.0556538	0.00341812	0.04048	0.0419499	0.0525549	0.0439864	0.0295436	0.0414006	0.0620466	-0.00632772	0.0114983	0.0418657	0.00894236	0.0159495	0.0484653	0.0495694	0.0281739	0.0179814	0.0311166	0.0189447	0.0391944	0.0171027	0.0130337	0.0484057	0.0325842	0.0312236	0.0320485	0.0295846	0.024875	0.0388797	0.0342997	0.0647838	0.0157901	0.0322113	0.0282116	0.0327141	0.0155086	0.00242204		609.67	0.909996
		610.061	0.0426046	0.0306243	0.0325336	0.056543	0.033721	0.0495641	0.0592497	0.0125757	0.0391542	0.038435	0.0558775	0.046725	0.0338096	0.0313661	0.0471981	-0.00823155	0.0195671	0.066972	0.0179888	0.0121438	0.0182841	0.0309301	0.0222897	0.0232462	0.0290856	0.0181458	0.040565	0.0174245	0.00691646	0.0425676	0.0275171	0.0277447	0.0337321	0.0317153	0.0293288	0.0338917	0.0375835	0.0707357	0.0128902	0.0446763	0.0364807	0.0330286	0.0160204	0.00250197		610.061	0.876203
		610.452	0.0448573	0.0255256	0.0395731	0.0566174	0.0301305	0.0412555	0.0448385	0.0267474	0.0447195	0.0467949	0.047756	0.0450531	0.0366158	0.0432069	0.0521552	0.022549	0.015888	0.0522731	0.0168853	0.0205647	0.0301009	0.0259781	0.0161311	0.0242648	0.0342064	0.0149219	0.040633	0.0234663	0.0177746	0.0468431	0.0429	0.0271502	0.0241302	0.0322381	0.0139077	0.0408652	0.0357313	0.0552942	0.0197522	0.0395076	0.0341055	0.0339978	0.0121533	0.00189802		610.452	0.860563
		610.843	0.0439091	0.0527071	0.0296318	0.0616961	0.0350474	0.0443456	0.0487501	-0.00482299	0.0403253	0.0353771	0.0501707	0.0427435	0.0325626	0.0314132	0.0544169	0.0176659	0.0129597	0.0521508	0.0150986	0.0235727	0.0433287	0.0296101	0.0274877	0.0201379	0.0323121	0.01465	0.0339072	0.0266755	0.0204938	0.0380514	0.0338484	0.0274497	0.0294435	0.0286387	0.0330511	0.0353292	0.0386492	0.0651269	0.0197946	0.0403201	0.0244563	0.0337191	0.0137605	0.00214903		610.843	0.888403
		611.234	0.0419253	0.0186092	0.0400641	0.0443007	0.043678	0.0369892	0.0440916	0.00914925	0.0434987	0.0266163	0.0458534	0.0394763	0.0324102	0.0460222	0.0302357	0.00349746	0.0214826	0.0257744	0.0204155	0.0213051	0.029442	0.0284012	0.024514	0.0195753	0.0314595	0.0184223	0.0307984	0.016573	0.0103456	0.0511376	0.0347806	0.0323343	0.0283479	0.0301791	0.0173591	0.0383783	0.0420797	0.057911	0.0182756	0.0408275	0.0293043	0.0308742	0.0120024	0.00187445		611.234	0.924678
		611.625	0.0380045	0.0126653	0.0319634	0.0802152	0.0583025	0.0348452	0.0481951	-0.00776502	0.0430194	0.0345411	0.0484923	0.0464565	0.0443675	0.038807	0.031959	0.0222374	0.0192971	0.0927494	0.0214948	0.0143736	0.025909	0.0412335	0.0329013	0.0217988	0.0270984	0.0153766	0.0312592	0.0173436	0.022037	0.0362618	0.0268675	0.0315285	0.0272794	0.0303329	0.0171341	0.0381388	0.0307904	0.0675259	0.0171115	0.0317431	0.0415154	0.0337904	0.0178541	0.00278834		611.625	0.93834
		612.017	0.0235308	0.0145971	0.032578	0.0775589	0.0374792	0.0444597	0.0439473	0.00755163	0.0415109	0.0360597	0.0514369	0.0372824	0.03248	0.0366843	0.0432763	0.0244042	0.0136849	0.0470303	0.0174049	0.022548	0.0279442	0.0265613	0.0168162	0.0208271	0.0268434	0.0171127	0.0399196	0.0223311	0.0319184	0.0619723	0.0174577	0.0303861	0.0390968	0.0263943	0.0160357	0.0375007	0.0376405	0.0574066	0.021164	0.0455979	0.0285026	0.0325594	0.0141627	0.00221184		612.017	0.905898
		612.408	0.0368193	0.0308559	0.0299239	0.0728084	0.0429035	0.047054	0.0452094	0.0236298	0.0437411	0.0344612	0.0413553	0.0411178	0.0341779	0.0551342	0.0411247	0.00649038	0.00769395	0.0439348	0.0191839	0.0321157	0.028016	0.0248808	0.028004	0.0181252	0.0349819	0.0168123	0.0348127	0.0180142	0.013552	0.0511656	0.0337782	0.0311172	0.0211593	0.0282407	0.0330976	0.0317634	0.0316264	0.0609495	0.021638	0.0443185	0.0329235	0.0333832	0.0133914	0.00209139		612.408	0.882934
		612.799	0.0347057	0.01699	0.0352177	0.059139	0.0414237	0.0610429	0.0415812	-0.000356323	0.0314288	0.0296322	0.0352894	0.0450809	0.0320735	0.0406196	0.0389566	-0.00687069	0.00813985	0.0414616	0.011103	0.0222477	0.0357712	0.030424	0.0244851	0.0165712	0.0260802	0.0154022	0.0413618	0.0131313	0.0213397	0.0397389	0.0046401	0.0326877	0.0263066	0.0281154	0.0140383	0.0294708	0.034635	0.0658667	0.0197982	0.0269755	0.028527	0.0291286	0.0151651	0.00236839		612.799	0.875665
		613.19	0.0276212	0.0291723	0.0386414	0.0537589	0.0337584	0.0302665	0.0316386	0.015532	0.0459398	0.0351296	0.0379504	0.0426828	0.0350445	0.0332269	0.0375287	-0.00854712	0.0122259	0.0405798	0.0224541	0.00890549	0.0365699	0.033417	0.0224427	0.019804	0.0271362	0.0146624	0.0287044	0.0181304	0.0202761	0.0335443	0.0187303	0.030632	0.0269359	0.0256682	0.0211279	0.0331672	0.0392523	0.0552097	0.0190538	0.0402421	0.0253042	0.0291103	0.0118663	0.0018532		613.19	0.881298
		613.581	0.0377938	0.0181715	0.0386092	0.0592957	0.0281279	0.0310005	0.0494585	0.0252833	0.037404	0.0311635	0.0539551	0.0394674	0.0308628	0.0322143	0.0380043	0.00879507	0.0184883	0.0366089	0.00886255	0.0222798	0.0229213	0.0248022	0.0211526	0.0142682	0.0251857	0.0176398	0.0372402	0.0293509	0.0156742	0.0357801	0.0311026	0.0268917	0.0318208	0.0218199	0.0182991	0.0292774	0.0341699	0.0461253	0.0201269	0.028971	0.0246113	0.0293433	0.0109724	0.00171361		613.581	0.880858
		613.972	0.0369034	0.0179279	0.0331542	0.0331568	0.0343188	0.0418208	0.0370371	-0.00153446	0.0307269	0.0344415	0.0380793	0.035463	0.0308285	0.0457161	0.0444629	0.000325756	0.0159741	0.0495518	0.0191207	0.0190291	0.0335786	0.0211979	0.0108781	0.022169	0.0254406	0.0136402	0.0296689	0.0208468	0.0151745	0.0617788	0.0170841	0.0304388	0.0228745	0.0274117	0.0168416	0.0330208	0.0454196	0.0605667	0.017158	0.0304574	0.024072	0.0286884	0.0135376	0.00211423		613.972	0.84052
		614.363	0.0281731	0.0226503	0.0285897	0.0615089	0.0378329	0.0424263	0.0361891	0.021644	0.0386462	0.039564	0.0445581	0.0481639	0.0279314	0.0256169	0.0389154	0.00505347	0.0187974	0.0400169	0.013053	0.0160695	0.0348891	0.0411621	0.0177311	0.0226622	0.0270785	0.0148094	0.0321068	0.0174023	0.0133021	0.050058	0.0101758	0.0265743	0.0293447	0.0241608	0.015286	0.0309159	0.03092	0.0519294	0.01452	0.0407182	0.0280337	0.0294922	0.012532	0.00195718		614.363	0.842764
		614.754	0.034308	0.0226302	0.0300185	0.0494305	0.038685	0.0439746	0.0453536	-0.00675475	0.0417294	0.0424245	0.0389743	0.0403504	0.0282795	0.0236995	0.0369747	0.0276636	0.0112299	0.0218899	0.0127447	0.0191427	0.0486545	0.0104462	0.0250872	0.01758	0.0206175	0.0143007	0.0326359	0.0140994	0.0247347	0.0417838	0.0287374	0.024185	0.029313	0.0261557	0.0189336	0.0408308	0.0267017	0.051965	0.00961873	0.035227	0.0259797	0.0285448	0.012633	0.00197294		614.754	0.859661
		615.145	0.0378388	0.0107711	0.0356081	0.0469207	0.0393486	0.0411168	0.0434558	0.0188883	0.0365962	0.0321381	0.0372715	0.0421145	0.0275582	0.0282135	0.0388725	0.00370315	0.0192772	0.0401665	0.0138091	0.00844826	0.0338314	0.0121311	0.0155157	0.018027	0.0286266	0.0141102	0.0349747	0.0111299	0.0204579	0.0395896	0.0193571	0.0262173	0.0203573	0.0262932	0.021257	0.0332262	0.0369072	0.0497378	0.0189028	0.0361361	0.0286688	0.0279896	0.0115792	0.00180836		615.145	0.833185
		615.536	0.0268853	0.0150005	0.0342148	0.0582415	0.0236885	0.0344421	0.0453241	0.025775	0.0306666	0.0290756	0.0328499	0.045221	0.0331718	0.0247759	0.0523779	0.014245	0.0148662	0.0442152	0.0162022	0.0212696	0.0229154	0.0275609	0.0237168	0.014927	0.0260249	0.0170689	0.0333545	0.0156396	0.0153991	0.0497155	0.0186348	0.0295602	0.0317825	0.0274284	0.0200056	0.0317006	0.0384945	0.0479795	0.0166727	0.0385695	0.0266286	0.0291778	0.0113532	0.00177307		615.536	0.83242
		615.927	0.0368138	0.0337121	0.03414	0.0448452	0.0312602	0.0316098	0.0396172	0.00562989	0.0368728	0.0373095	0.0482019	0.039914	0.0279106	0.0377925	0.0366018	0.0170501	0.0152795	0.0265772	0.0159381	0.0240096	0.0351356	0.0346054	0.0191245	0.0191407	0.0247674	0.0165896	0.0347615	0.0172673	0.0215423	0.0499485	0.015919	0.0287626	0.0179573	0.0237432	0.0105948	0.0307891	0.0222709	0.0534611	0.0164847	0.0428601	0.0284224	0.0289081	0.0111259	0.00173757		615.927	0.814619
		616.318	0.0318405	0.0163913	0.0297023	0.065044	0.042853	0.0382229	0.0464098	-0.00348766	0.0382695	0.0315266	0.048064	0.0320947	0.0257746	0.0385578	0.031703	0.00582095	0.00580819	0.0365309	0.0190087	0.0153462	0.0294599	0.031498	0.0212385	0.0153208	0.0275847	0.0159335	0.0393696	0.0146488	0.0129451	0.0584651	0.0238066	0.0313134	0.031302	0.0243355	0.0242937	0.0299328	0.0205028	0.0436297	0.0165756	0.0272959	0.0254241	0.0283014	0.0135064	0.00210935		616.318	0.810462
		616.709	0.0362775	0.0303396	0.030268	0.0667617	0.0401767	0.0464839	0.0358827	-0.00469706	0.039476	0.0294133	0.0436599	0.0353912	0.0354557	0.034728	0.0359822	0.00933877	0.0197565	0.0792999	0.0182116	0.00724183	0.0234948	0.0251215	0.0419447	0.020065	0.0259026	0.0146826	0.032359	0.012359	0.00860903	0.0435013	0.0149917	0.0276794	0.0278751	0.0289462	0.0155148	0.0295664	0.0240967	0.0563229	0.0168847	0.0269689	0.0305956	0.0296812	0.015527	0.00242491		616.709	0.82508
		617.101	0.0476018	0.00913221	0.0341089	0.0523521	0.0312425	0.0381133	0.0389926	0.0128146	0.0278823	0.0357113	0.0363551	0.0409005	0.0257669	0.0304326	0.0381835	0.00748221	0.00880758	0.0304561	0.0210517	0.0113167	0.0389431	0.0405873	0.0187063	0.0198055	0.0285531	0.0140507	0.0377813	0.00673782	0.013655	0.0274183	0.0129676	0.0273143	0.0308646	0.0225881	0.0135916	0.0275861	0.0345939	0.0492138	0.00868604	0.034235	0.024181	0.0270918	0.012203	0.00190579		617.101	0.783389
		617.492	0.0270382	0.00131766	0.0307553	0.0271615	0.027218	0.0299289	0.0373578	0.0102196	0.0354375	0.0314678	0.0353031	0.0352892	0.0264327	0.0261471	0.0469861	0.0368508	0.00960111	0.0411094	0.0117699	0.0136752	0.0403526	0.0141995	0.0230057	0.0174518	0.0208674	0.0122286	0.0304994	0.0156844	0.0143391	0.0271098	0.0186427	0.0271567	0.0216661	0.0300466	0.016801	0.0265057	0.0296831	0.0470342	0.0132907	0.0285992	0.0252463	0.0254019	0.0103874	0.00162224		617.492	0.791653
		617.883	0.0347912	0.0243181	0.0229595	0.0510712	0.036958	0.0333787	0.0427864	0.00396933	0.0378078	0.0337899	0.0442832	0.0376167	0.0317947	0.0372348	0.0361316	0.00699113	0.0103531	0.0334677	0.0164074	0.020364	0.033591	0.0291329	0.0162113	0.0110266	0.0210056	0.0148033	0.0388719	0.0152991	0.0104321	0.0365545	0.0147362	0.0271563	0.0301675	0.0232657	0.0167008	0.0321412	0.0295074	0.0466352	0.0128028	0.0375774	0.0222284	0.0272274	0.0116083	0.0018129		617.883	0.756455
		618.274	0.0242508	0.0292677	0.0287343	0.0421127	0.0356139	0.0261609	0.0354691	0.000872384	0.0427685	0.030431	0.0451645	0.0385137	0.0313622	0.0266982	0.0403038	-0.00401829	0.016226	0.0340551	0.0142689	0.0195175	0.0352486	0.0258426	-0.00246846	0.0095979	0.0204472	0.0150004	0.0319833	0.0167355	0.0180721	0.0401314	0.0144041	0.0275937	0.0306659	0.0233123	0.0156001	0.0286283	0.0252202	0.0398725	0.0156011	0.0241946	0.0256457	0.025344	0.0117526	0.00183545		618.274	0.784715
		618.665	0.0260235	0.0118408	0.0289445	0.0309212	0.028435	0.0370799	0.0409759	-0.00231144	0.0385345	0.0319335	0.0360521	0.0364457	0.0250509	0.0295377	0.0324363	0.0153805	0.00864857	0.0335798	0.0145112	0.0159279	0.0278673	0.034187	0.0100842	0.0177691	0.0230164	0.0119124	0.0313972	0.0144724	0.00989915	0.0293684	0.0309912	0.0231611	0.0182806	0.0278202	0.0217041	0.0306426	0.0332689	0.0657199	0.0102506	0.0244009	0.0240315	0.0253706	0.0116725	0.00182293		618.665	0.77989
		619.056	0.0291676	0.00974765	0.0318457	0.0278738	0.033972	0.0352968	0.0404935	0.0132586	0.0342468	0.031212	0.0387506	0.0325556	0.0279223	0.022833	0.0374214	-0.0065472	0.0213436	0.0275131	0.0165836	0.0124264	0.0298632	0.0182292	0.0219904	0.0191838	0.0222232	0.0118966	0.0255648	0.0207343	0.0187718	0.0266048	0.0193718	0.024544	0.0284804	0.0176797	-0.00133863	0.0182307	0.0343646	0.0604648	0.00695913	0.0155024	0.0236366	0.0239238	0.0116404	0.00181793		619.056	0.747101
		619.447	0.0289425	0.0238239	0.0213072	0.0288111	0.0239956	0.029652	0.0352775	0.0107739	0.0270483	0.0274979	0.0470852	0.0372655	0.0281445	0.0276529	0.0417175	0.0123264	0.0157144	0.0162771	0.0149823	0.0133224	0.031141	0.0312908	0.0163461	0.0238391	0.0239319	0.0152882	0.0371273	0.0159633	0.0192863	0.0378951	0.0128027	0.0292914	0.0240989	0.0202958	0.00878455	0.0308351	0.0317384	0.0452134	0.0154772	0.0267891	0.0212092	0.0251284	0.00937793	0.00146459		619.447	0.733612
		619.838	0.0314138	0.00898345	0.0334228	0.0420445	0.0355517	0.0406688	0.0343858	0.0068797	0.0357793	0.0275573	0.0364596	0.0321175	0.0282384	0.0320125	0.0293882	0.00104498	0.0097912	0.0197297	0.0132041	0.0275138	0.0390533	0.032655	0.0232585	0.0205066	0.019248	0.0114602	0.0373218	0.0200938	0.00922067	0.0392229	0.00929055	0.0271849	0.0299918	0.0243356	0.0104808	0.0330801	0.0207965	0.0493082	0.015275	0.0283361	0.0246388	0.0256328	0.0112275	0.00175344		619.838	0.756062
		620.229	0.0351753	0.0209597	0.0349938	0.0418589	0.0289582	0.0467795	0.0402697	-0.0123972	0.0367322	0.0279335	0.0379162	0.0323534	0.0263042	0.0576307	0.0266971	0.0152277	0.0172138	0.0442788	0.0118247	0.0148582	0.022452	0.0194058	0.0184188	0.0172174	0.0182579	0.0138639	0.0306686	0.0181113	0.00744399	0.0358607	0.0165985	0.0219444	0.0207423	0.0223108	0.0143582	0.03349	0.0314079	0.0405516	0.0145036	0.0901637	0.0238306	0.0272481	0.0159324	0.00248822		620.229	0.721227
		620.62	0.0350902	0.0206669	0.0224839	0.0314195	0.033882	0.0420126	0.0366293	-0.00242928	0.0320949	0.0351178	0.0359718	0.0314596	0.0279769	0.0342964	0.0331744	-0.00113036	0.0166365	0.0265783	0.00964406	0.0158856	0.0183108	0.03198	0.0167039	0.0155164	0.0251428	0.012556	0.0278715	0.0173929	0.0154393	0.036078	0.0142201	0.0250843	0.0317074	0.0177162	0.0181888	0.0283616	0.0227392	0.0449909	0.00973203	0.0299838	0.0205327	0.0243344	0.0105909	0.00165402		620.62	0.702962
		621.011	0.0274924	0.0263603	0.0220599	0.0393255	0.0244285	0.0216605	0.040957	-0.00794796	0.0406594	0.0286767	0.0415815	0.0294981	0.0211002	0.0360561	0.0348675	0.0250297	0.00836256	0.0448987	0.0088324	0.0202295	0.0249528	0.0421884	0.0143172	0.0227067	0.0192417	0.0144955	0.0311509	0.0146791	0.0103317	0.0268615	0.0221881	0.0221965	0.0257411	0.0231703	0.00896259	0.0226385	0.0235449	0.0449942	0.0151126	0.0393109	0.0208211	0.0249691	0.0113103	0.00176638		621.011	0.694003
		621.402	0.0286783	0.0157044	0.0298953	0.0429706	0.0292943	0.0376594	0.035783	0.0230079	0.0386054	0.0284489	0.0417864	0.0333734	0.0220538	0.0290474	0.0268441	0.0105463	0.00544443	0.0203384	0.0162353	0.0142533	0.0297228	0.0277879	0.0133027	0.0186073	0.0204166	0.00998442	0.0302617	0.00729864	0.0127901	0.0279364	0.0353153	0.0225835	0.0329285	0.0213667	0.00894779	0.0323083	0.0304672	0.0452531	0.0127597	0.0306412	0.0239123	0.0249893	0.0101258	0.00158138		621.402	0.726496
		621.794	0.0321376	0.0242867	0.0267993	0.0491425	0.0221095	0.0269943	0.0381556	0.0376013	0.034339	0.0312091	0.0343489	0.038548	0.0277073	0.0292547	0.0446407	0.00551608	0.015024	0.0416212	0.0193551	0.0233752	0.0272842	0.0256402	0.0274721	0.0169323	0.0224754	0.0118051	0.0294434	0.0142556	0.0228169	0.0465651	0.0203613	0.0254606	0.0247777	0.0201471	0.0182883	0.0213777	0.0278001	0.0474192	0.0139299	0.0408106	0.0224701	0.0275536	0.0100819	0.00157452		621.794	0.712628
		622.185	0.0415538	0.0185943	0.030991	0.0378647	0.0207411	0.0386983	0.0346002	0.0141698	0.0201679	0.0237254	0.0333633	0.030643	0.0196415	0.037281	0.0317378	0.0152366	0.0110115	0.0268416	0.0119649	0.01669	0.025639	0.019199	0.0216608	0.0119106	0.0221233	0.0105701	0.0265002	0.00810746	0.0145801	0.0401499	0.0281085	0.0250296	0.0152913	0.0195636	0.0109719	0.0295549	0.0317067	0.0428785	0.0072926	0.0196502	0.017599	0.0235026	0.00974822	0.00152242		622.185	0.707357
		622.576	0.0186718	0.0152861	0.0304582	0.0396656	0.025851	0.0253784	0.0333448	-0.000244694	0.0443917	0.0257776	0.0301446	0.0314873	0.0219425	0.0325254	0.0199355	0.0133904	0.0114133	0.0286985	0.00712043	0.0242349	0.0260266	0.0323328	0.0201087	0.01637	0.0185279	0.0113149	0.0231399	0.0193153	0.0117729	0.0371167	0.0208069	0.0214557	0.0232283	0.0194435	0.0139861	0.0258474	0.0252342	0.0521729	0.010912	0.0311401	0.0231685	0.0234852	0.00998441	0.0015593		622.576	0.696875
		622.967	0.0304714	0.013118	0.0245393	0.0364128	0.0286867	0.0279795	0.0403961	0.0115588	0.039505	0.0296417	0.0358354	0.0355554	0.0215512	0.0246308	0.0224421	0.0157148	0.0101818	0.026264	0.00837441	0.01407	0.034452	0.0271084	0.0168046	0.0125265	0.0198004	0.0127949	0.0327187	0.00961555	0.0207931	0.0385747	0.0216125	0.0189932	0.0243838	0.0204551	0.00522489	0.0231017	0.0207754	0.0430973	0.0195597	0.026203	0.0247157	0.0236644	0.0094762	0.00147993		622.967	0.65399
		623.358	0.0218423	0.0322012	0.0281716	0.0341201	0.0294366	0.041212	0.0321299	0.00128455	0.0246052	0.0296231	0.0306408	0.0332787	0.0229666	0.03111	0.0258212	-0.00625687	0.0128172	0.0347893	0.0137624	0.0146767	0.033926	0.013476	0.0161182	0.0159127	0.0137422	0.0107506	0.0245099	0.0209234	0.00915889	0.0283874	0.0206237	0.0232164	0.0185801	0.020577	0.00927843	0.0267894	0.0211515	0.0350502	0.0108832	0.0238077	0.0196411	0.0220668	0.00984999	0.00153831		623.358	0.64816
		623.749	0.0301704	0.0278744	0.0235639	0.105933	0.0324909	0.0375569	0.030911	-0.00466849	0.0282815	0.0242897	0.0322388	0.0428986	0.0358886	0.0346035	0.0327898	0.000290222	0.0054813	0.0645664	0.00590906	0.0106159	0.0219587	0.0212583	0.0570471	0.0213308	0.0193935	0.0101902	0.0287602	0.012465	0.0194194	0.0265613	0.0194284	0.0225873	0.0221108	0.0203714	0.0182476	0.0278492	0.038964	0.0436481	0.0120002	0.0114242	0.0320992	0.0270439	0.0184225	0.00287711		623.749	0.643127
		624.14	0.0193515	0.0300437	0.0183288	0.0398161	0.026982	0.0277938	0.0279817	-0.00848156	0.0230826	0.0283804	0.0326801	0.0256411	0.0209063	0.0322204	0.0276583	0.00660419	0.00733578	0.0431287	0.0146212	0.0268606	0.0268546	0.0125016	0.0265313	0.0186311	0.024286	0.00928474	0.0336068	0.0124216	0.020938	0.0399413	0.014764	0.0283007	0.0280947	0.0214611	0.0175816	0.0194675	0.0254059	0.0380316	0.015696	0.0344702	0.0229612	0.0234675	0.010004	0.00156237		624.14	0.627861
		624.531	0.0298596	0.0168072	0.0185261	0.0518985	0.0180266	0.0389013	0.0372029	0.00199569	0.0272618	0.0215186	0.0270407	0.0298703	0.02409	0.0307182	0.039874	0.00890019	0.00891571	0.029371	0.0144511	0.0109731	0.0319307	0.00744048	0.00861782	0.0185575	0.0214941	0.0132567	0.0251035	0.0155967	0.00553706	0.0385374	0.0328151	0.0187922	0.0168969	0.0247309	0.0223671	0.0201671	0.0166286	0.041645	0.0158408	0.0379756	0.0189888	0.0229054	0.0110865	0.00173142		624.531	0.643057
		624.922	0.0285793	0.019232	0.0295298	0.0298447	0.0285479	0.0336648	0.0298388	0.00457808	0.0303053	0.0256634	0.0314549	0.0300378	0.0251036	0.0316912	0.0212329	0.00219008	0.0158242	0.0156107	0.0159874	0.0185703	0.0270503	0.0250755	0.0198801	0.0199637	0.0161728	0.0112459	0.0271391	0.0147539	0.0144378	0.0365665	0.00883086	0.0232939	0.0396746	0.0195146	0.0206807	0.0284581	0.0230406	0.043111	0.0125958	0.0214627	0.0204839	0.0229493	0.00876857	0.00136942		624.922	0.636625
		625.313	0.0242125	0.0151552	0.0206793	0.0305023	0.0331188	0.0268008	0.033363	0.0275831	0.0285979	0.0205687	0.0373411	0.0313808	0.0210653	0.0260593	0.0491992	-0.00444366	0.0130375	0.0410653	0.0154236	0.0213226	0.0166539	0.0159857	0.0230302	0.0140003	0.0133685	0.00832754	0.0240524	0.0142481	0.0201863	0.0442331	0.0366052	0.0185532	0.0358847	0.0174768	0.0157012	0.0245336	0.0312743	0.0462947	0.0108014	0.0402685	0.0200589	0.0244774	0.0111211	0.00173682		625.313	0.631445
		625.704	0.0297413	0.0125669	0.016525	0.0310623	0.0185512	0.0343964	0.0258042	-0.00698457	0.0296147	0.0294804	0.0291734	0.0272981	0.0251852	0.0236467	0.0230333	-0.000549751	0.0168505	0.0301453	0.0113207	0.0125346	0.0207695	0.0233654	0.00645253	0.0148496	0.0208655	0.0128642	0.0268824	0.0154946	0.000879084	0.04222	0.0081176	0.0233073	0.0168159	0.0190035	0.0136272	0.0234263	0.0252496	0.0373659	0.0119475	0.0205786	0.0208592	0.0201058	0.0100024	0.00156211		625.704	0.600459
		626.095	0.0227837	0.0154209	0.0210597	0.0384806	0.0341869	0.0293741	0.031664	0.0112797	0.0287285	0.0277408	0.0327074	0.0280286	0.0199635	0.0257209	0.0231876	0.00861817	0.0137527	0.0370148	0.012743	0.02017	0.0163699	0.0117888	0.00949814	0.0114366	0.0201222	0.00986467	0.0247781	0.00808307	0.0118093	0.0266663	0.0134214	0.016364	0.0187157	0.0232934	0.0121359	0.0148518	0.014967	0.0351838	0.0173058	0.032841	0.0208743	0.0208048	0.00854147	0.00133395		626.095	0.612143
		626.486	0.017512	0.0304185	0.0213785	0.0226195	0.0162121	0.0335339	0.027313	-0.00392239	0.0295893	0.0228564	0.0340409	0.0307657	0.0231285	0.0228791	0.0324866	0.0139346	0.0153809	0.0370857	0.0109602	0.0141301	0.0193188	0.0212782	0.0174176	0.00657965	0.0214336	0.00809867	0.0254701	0.0127812	0.0112551	0.0407478	0.0106127	0.0251476	0.014234	0.0191716	0.000888651	0.0230739	0.0268261	0.0346875	0.0105474	0.0330703	0.0190736	0.0208297	0.00980302	0.00153098		626.486	0.579341
		626.878	0.0340413	0.0426381	0.0172856	0.0444452	0.0189448	0.0450784	0.0269832	-0.00110415	0.0321485	0.0242639	0.0288918	0.0302392	0.0169638	0.0150106	0.0398834	-0.0115671	0.0161277	0.0253008	0.0119757	0.0153677	0.0215295	0.0180527	0.0164602	0.0129055	0.0199845	0.0107461	0.0321812	0.0182848	0.00921034	0.0321236	0.037001	0.0239033	0.0102008	0.0181665	0.0201606	0.0256166	0.0256769	0.0329582	0.00890833	0.0257901	0.0187345	0.022232	0.0115842	0.00180915		626.878	0.59775
		627.269	0.0165305	0.00962833	0.0232376	0.0462627	0.0229835	0.0280337	0.0319203	0.00565426	0.0310608	0.0195042	0.0316993	0.0345982	0.0190806	0.0359954	0.0460931	0.00186423	0.0068674	0.0294003	0.00919992	0.0118264	0.0362014	0.0050148	0.0207452	0.0111214	0.0224355	0.00992513	0.0214692	0.0116266	0.0211464	0.0309472	0.0213383	0.022189	0.0219014	0.0275125	0.0113562	0.0262994	0.0158975	0.0332484	0.0116559	0.0122811	0.0152179	0.0212432	0.0107679	0.00168166		627.269	0.579698
		627.66	0.0302906	0.0118894	0.0255423	0.0372656	0.0192351	0.0358122	0.0315387	-0.0010153	0.0253423	0.0231596	0.0269906	0.0324873	0.0193654	0.0239857	0.0285376	0.00364118	0.00732166	0.0117707	0.00943473	0.0140164	0.0211323	0.0204466	0.0131257	0.0121659	0.0174076	0.0132858	0.0210455	0.0106859	0.00938822	0.00815622	0.024731	0.0217255	0.0257981	0.0100875	0.0177502	0.0224845	0.021052	0.0446274	0.0128862	0.0282179	0.0179556	0.0197748	0.00950079	0.00148377		627.66	0.600413
		628.051	0.0238635	0.0196789	0.0225673	0.0305957	0.0196953	0.0286323	0.0270531	0.011459	0.0269967	0.0272957	0.0312359	0.0237719	0.0180767	0.023994	0.0354217	0.0122118	0.00505504	0.0235136	0.0126465	0.0147651	0.0227968	0.0237551	0.017792	0.0151807	0.014905	0.0160341	0.015312	0.00585233	0.00521137	0.0387308	0.0168328	0.0231679	0.0162473	0.0121193	0.0183633	0.0215006	0.0251251	0.0341072	0.0130483	0.0239581	0.0158318	0.0203513	0.00780138	0.00121837		628.051	0.586969
		628.442	0.025609	0.00523772	0.0244499	0.0259127	0.0172708	0.0173298	0.0302249	-0.000699135	0.0338394	0.0237495	0.0279177	0.0244475	0.0168592	0.0214393	0.0250323	-0.0103988	0.00436421	0.0286461	0.00756553	0.0170525	0.0221375	0.00869972	0.0169763	0.0152631	0.012956	0.0106672	0.0204088	0.00708311	0.016819	0.0338364	0.0276454	0.0252157	0.0182409	0.0189087	0.0102625	0.0259928	0.0207603	0.0390201	0.00734806	0.0228881	0.0155619	0.0185986	0.00980718	0.00153162		628.442	0.571518
		628.833	0.0244848	0.00456918	0.0133804	0.040501	0.0231881	0.0322572	0.0381502	0.00307144	0.0273201	0.0259094	0.0289769	0.0285102	0.0172131	0.0608484	0.022154	-0.00211987	-0.00114221	0.0230447	0.013336	0.0100541	0.0282555	0.020639	0.0157078	0.00801278	0.0156954	0.00782658	0.0236998	0.0172086	0.00716063	0.0183774	0.0107291	0.0192968	0.0256916	0.0158768	0.0100092	0.0301701	0.0204113	0.0317952	0.0156288	0.0551882	0.0173351	0.0206932	0.012897	0.00201417		628.833	0.551914
		629.224	0.0232559	0.0153676	0.0247938	0.0322	0.0269592	0.0153829	0.0318383	-0.00519517	0.0299722	0.0251728	0.0267992	0.0244319	0.0211071	0.0218773	0.0273932	0.0115854	0.0135747	0.0240845	0.0076255	0.0093941	0.0241829	0.0117952	0.0175741	0.0158326	0.0170221	0.0116509	0.0284103	0.0165065	0.0118543	0.0395077	0.0128196	0.0179853	0.0146556	0.0195712	0.00537034	0.0217669	0.0230972	0.0368983	0.0089241	0.0198647	0.0166002	0.0195003	0.00873958	0.00136489		629.224	0.548879
		629.615	0.0175418	0.0191706	0.0197587	0.0389835	0.0193332	0.017171	0.0393985	0.00135503	0.0273077	0.0195585	0.0268555	0.0192952	0.0156964	0.0196915	0.025016	-0.0176475	0.0064485	0.0334935	0.00967956	0.0167701	0.0234414	0.0236587	0.0175193	0.0150851	0.0153002	0.0109278	0.0207164	0.0197564	0.0166281	0.0312829	0.00184777	0.0192043	0.0214881	0.0196473	0.0140559	0.0206796	0.0152907	0.0390003	0.00833629	0.0230517	0.0217384	0.0188667	0.01023	0.00159766		629.615	0.521912
		630.006	0.0127281	-0.00224609	0.0217496	0.0449503	0.0202764	0.0254374	0.0317933	-0.00969911	0.0164297	0.0180593	0.0247288	0.0215229	0.0162792	0.0227637	0.0404957	0.0213833	0.00993679	0.016717	0.0117521	0.0124558	0.0188739	0.0200986	0.0135526	0.0131947	0.0189767	0.0107159	0.0216415	0.00999265	0.0129375	0.0316132	0.0123136	0.017043	0.0223703	0.0173308	0.00705803	0.0244181	0.0227634	0.0416111	0.0121741	0.0329982	0.0195843	0.0189946	0.0102896	0.00160697		630.006	0.530726
		630.397	0.0305819	0.0042362	0.0195641	0.0353325	0.0196605	0.0237386	0.0333226	0.0163436	0.0313259	0.0203825	0.0302648	0.0204092	0.0201245	0.0173741	0.0310141	-0.00474296	0.0112687	0.00707838	0.00476257	0.011993	0.0259259	0.0406433	0.0161939	0.0132477	0.0107843	0.0121257	0.0171015	0.0105501	0.017954	0.0351227	0.0186754	0.0182021	0.0202505	0.0155285	0.0137246	0.0200474	0.0250266	0.0370339	0.0100794	0.0369985	0.0176812	0.0199252	0.00998268	0.00155903		630.397	0.540338
		630.788	0.0239713	0.00758421	0.0276885	0.0570131	0.0257372	0.0237688	0.0266287	-0.0042826	0.0274499	0.0213493	0.0260115	0.023155	0.0181199	0.0210903	0.0195838	0.000201177	0.000896983	0.0197542	0.0121936	0.00888819	0.0219771	0.0224493	0.0096367	0.0129864	0.0181347	0.0119045	0.016391	0.0112619	0.0113037	0.0307335	0.00868575	0.0184952	0.0199891	0.0164902	0.0129214	0.0197002	0.0268954	0.0345955	0.0111835	0.0275303	0.0169781	0.0187084	0.0103284	0.00161302		630.788	0.551505
		631.179	0.0116577	-0.00256227	0.0195439	0.0322449	0.01924	0.0383757	0.0321397	-0.00887768	0.0245625	0.0213018	0.0247388	0.0251041	0.01926	0.0244558	0.0403841	0.0066135	0.00696157	0.0338921	0.00838809	0.00993196	0.026975	0.0272845	0.0100725	0.0158223	0.016142	0.01077	0.0286239	0.0169993	0.0171745	0.0207527	0.00462721	0.0176513	0.029115	0.022082	0.0161594	0.0220004	0.0217398	0.0346661	0.0117154	0.0248045	0.0199343	0.0195724	0.010352	0.00161671		631.179	0.5192
		631.571	0.021161	0.0197818	0.020363	0.0230887	0.0218835	0.0271839	0.026695	0.0062466	0.0242468	0.0172023	0.0267072	0.0263504	0.0187866	0.0195757	0.0175132	-0.00671899	0.0122907	0.0295112	0.00967467	0.00956083	0.0197939	0.0180526	0.0102282	0.0147814	0.0101935	0.0109918	0.0233083	0.00982715	0.0189059	0.0312257	0.00596137	0.017075	0.0128231	0.0151966	0.00990189	0.0252595	0.0233925	0.0266449	0.0118668	0.0185297	0.0168645	0.017608	0.00757595	0.00118316		631.571	0.500303
		631.962	0.0205058	0.0141619	0.0196169	0.0445732	0.0202355	0.0288664	0.0308858	-0.00427391	0.0215664	0.0177738	0.0212638	0.0294941	0.0171647	0.02233	0.033269	0.016397	0.0146098	0.0195907	0.00850444	0.0160714	0.0120102	0.0179786	0.0112531	0.00997891	0.0191925	0.00894969	0.0195955	0.00348829	0.00577674	0.0146666	0.0132183	0.0196495	0.0271172	0.016853	0.0176248	0.0137254	0.0159256	0.0366314	0.0101828	0.0209942	0.0191137	0.0182081	0.00881482	0.00137664		631.962	0.502619
		632.353	0.0201829	-0.0216299	0.0198191	0.0364768	0.0285781	0.00943861	0.0231626	0.012172	0.0247801	0.0177962	0.0292305	0.0205947	0.0158731	0.0137378	0.0162377	0.000944905	0.0135046	0.0169052	0.00867896	0.00930751	0.0180078	-0.0129172	0.0183064	0.00866922	0.0104005	0.00748957	0.0148952	0.0026004	0.0112204	0.0275941	0.0321902	0.0187679	0.0111252	0.0184493	0.0133813	0.0134045	0.0197638	0.0294931	0.0126476	0.0266151	0.0165466	0.0154742	0.0107201	0.0016742		632.353	0.518305
		632.744	0.0299762	0.0134621	0.0116656	0.0345111	0.0235198	0.0179242	0.032882	0.00309423	0.0244595	0.010026	0.0247616	0.0234454	0.0184888	0.0230188	0.0128014	0.0014456	0.0072562	0.022181	0.004217	0.00829476	0.0142562	0.00754743	0.012778	0.0101053	0.0099329	0.00748062	0.0132377	0.00600161	0.012459	0.0159362	0.00793686	0.017461	0.0187955	0.0188515	0.0201139	0.021243	0.0250787	0.0310933	0.0124968	0.0163865	0.0164361	0.0161722	0.00811977	0.00126809		632.744	0.492991
		633.135	0.0199186	0.015113	0.0215011	0.0201173	0.0269833	0.0186439	0.0300548	0.00706183	0.0302886	0.0210373	0.0321449	0.0243105	0.0216896	0.0170204	0.0345885	-0.0146217	0.00486749	0.0339998	0.00759115	0.0129873	0.0133351	0.0252184	0.00513443	0.0154789	0.0143033	0.0110678	0.0195508	0.0153241	0.00478577	0.0230833	0.00374029	0.0191437	0.0220967	0.0195986	0.0200617	0.0165632	0.0231743	0.0304199	0.00783468	0.0128598	0.0182997	0.0177164	0.00955879	0.00149283		633.135	0.513166
		633.526	0.0265034	0.0225179	0.016675	0.0529431	0.0189054	0.0327079	0.026878	0.00718601	0.0248148	0.0205376	0.0217825	0.0294113	0.0213772	0.026907	0.0242088	0.00718732	0.00638643	0.0358865	0.00918301	0.00923571	0.0256085	0.0189315	0.0285387	0.0133401	0.0171734	0.0127793	0.0227996	0.00727604	0.00585717	0.0366031	0.0110028	0.0194378	0.0189638	0.0146587	0.00819521	0.0185972	0.0199882	0.0328847	0.00951726	0.0259318	0.019336	0.0202111	0.00982	0.00153363		633.526	0.467807
		633.917	0.0255874	0.02745	0.0160599	0.029314	0.0196054	0.00975767	0.0196551	0.00730768	0.0247012	0.0108871	0.0302529	0.0217261	0.0142916	0.0182394	0.0134824	0.0100409	0.00369164	0.0276675	0.00709853	0.00565284	0.0200402	0.00481781	0.0139794	0.00820102	0.0206218	0.00881646	0.024064	0.00860085	0.012157	0.0236976	0.00274362	0.0185355	0.0199061	0.0155717	0.00647827	0.0158937	0.0159949	0.0249606	0.00567931	0.0297247	0.0162577	0.0160783	0.00786931	0.00122898		633.917	0.497777
		634.308	0.0262819	0.0154481	0.0190649	0.0419007	0.012264	0.0194881	0.0271253	0.0114452	0.0235082	0.0193218	0.0228655	0.0202665	0.018355	0.02241	0.0386483	0.00996363	0.00391308	0.021437	0.00716608	0.0124612	0.0193144	0.00950478	0.0139436	0.00912396	0.019941	0.00708324	0.017844	0.00639727	0.0103951	0.0256899	0.0158178	0.0194608	0.0128379	0.0162606	0.0133861	0.0184534	0.0244029	0.0254294	0.0106202	0.0228333	0.0154878	0.0177454	0.00783671	0.00122389		634.308	0.467184
		634.699	0.0242527	0.0133637	0.0232155	0.0418811	0.0207344	0.0306684	0.0245357	0.00612803	0.0195772	0.020665	0.021442	0.0230281	0.0172979	0.020551	0.0207277	0.00221356	0.00871328	0.0144403	0.00352681	0.0128603	0.0196898	0.0270611	0.0030655	0.00495685	0.016928	0.00871626	0.0224684	0.0123944	0.00920829	0.0179173	0.004756	0.0168399	0.0182667	0.0166735	0.00740287	0.0203438	0.0303211	0.0292625	0.0145942	0.0189852	0.015678	0.0172037	0.00843344	0.00131708		634.699	0.489743
		635.09	0.0231073	0.00573274	0.017309	0.009582	0.0204424	0.0222379	0.025536	0.00190238	0.0243514	0.0220717	0.0194887	0.0240853	0.0185949	0.0219244	0.0187405	0.0423754	0.0140361	0.0281304	0.0130667	0.00113879	0.0164577	0.0203907	0.0152474	0.015359	0.0180538	0.0088314	0.0136516	0.0174812	0.0227794	0.0299901	0.0156533	0.017093	0.0196297	0.0123686	0.0155808	0.021419	0.013433	0.0249123	0.0109438	0.027787	0.0154561	0.0182042	0.00747528	0.00116744		635.09	0.441083
		635.481	0.0160039	0.0112216	0.0176114	0.0415455	0.0131393	0.00901606	0.0263103	0.00675784	0.0174084	0.0180849	0.0230567	0.0219964	0.0146973	0.0246466	0.0204324	0.0204238	0.00862654	0.00625388	0.00577518	0.00412517	0.0240892	0.0156202	0.0180073	0.00911572	0.0201424	0.00652481	0.0174778	0.00652432	0.0186779	0.0141761	0.0188434	0.01594	0.0139791	0.0160331	-0.00107744	0.0185193	0.0203629	0.0369525	0.00802705	0.00837549	0.0136387	0.0157825	0.00818879	0.00127887		635.481	0.486522
		635.872	0.0231911	0.022185	0.0203499	0.0128502	0.0163258	0.0133414	0.0215054	0.0071532	0.0274366	0.0181496	0.0237049	0.022051	0.0164171	0.0252238	0.0178628	-0.00323133	0.0137539	0.0211184	0.00775566	0.0133308	0.0127689	0.00530514	0.016011	0.0115835	0.00855279	0.00821406	0.0255198	0.0101821	0.00831886	0.0222198	0.00614142	0.0140353	0.0141586	0.0163579	0.017606	0.01744	0.0216387	0.0276524	0.0107333	0.0251675	0.0151382	0.015981	0.00681235	0.00106391		635.872	0.435441
		636.263	0.0222415	0.0101708	0.0245103	0.0152145	0.0171778	0.00969518	0.0230762	-0.0161116	0.0380722	0.0188285	0.0147649	0.0236242	0.0186019	0.013325	0.0238606	0.00887601	0.0043413	0.0175487	0.0115556	0.00638403	0.0170226	0.0228433	0.0143842	0.0109889	0.00981808	0.0103454	0.0166946	0.0117128	0.00216226	0.0210957	0.004451	0.0177531	0.0154744	0.0122407	0.000673825	0.0323894	0.0140743	0.0295433	0.0140393	0.0120567	0.0090232	0.014745	0.00914288	0.00142788		636.263	0.458134
		636.655	0.0115642	0.0182464	0.0191427	0.045621	0.0178983	0.0218734	0.0296829	0.00782162	0.0255979	0.0107002	0.0194127	0.0184673	0.018534	0.0174375	0.0120459	0.00677173	0.0101518	0.0181006	0.00768587	0.0109564	0.0152143	0.0216391	0.01023	0.0118013	0.012252	0.00397938	0.0183841	0.00526351	0.0033948	0.0261616	0.00637965	0.0146349	0.0174883	0.0196045	0.0119418	0.0253569	0.025158	0.0324084	0.0140186	0.0287571	0.0162638	0.0167816	0.00843634	0.00131753		636.655	0.44461
		637.046	0.0232326	0.00839533	0.0181367	0.031698	0.0123774	0.0223177	0.020753	-0.00775732	0.0202046	0.0237612	0.0260036	0.0224811	0.0205098	0.0116099	0.0430892	0.0195933	0.0110112	0.0170743	0.00700731	-0.000417362	0.0166117	0.00930415	0.0118264	0.00815967	0.0208272	0.00799944	0.0143788	0.0111713	0.011295	0.0156258	0.00343164	0.0164561	0.0120044	0.0124014	0.0106666	0.0196565	0.0167425	0.0295154	0.00839565	0.0156774	0.0150929	0.0155688	0.00870496	0.00135949		637.046	0.446913
		637.437	0.0243392	0.00831147	0.0160516	0.026661	0.0165125	0.0195038	0.0180404	-0.0143966	0.0155793	0.0207387	0.0243122	0.0236459	0.0137574	0.022225	0.0318944	0.00267226	0.0126389	0.0177705	0.0113072	0.0120423	0.0153218	0.0163259	0.0137311	0.0123744	0.00986817	0.00850452	0.0169285	0.0137067	0.00718962	0.0400224	0.00808405	0.0170684	0.0157539	0.0127925	0.00881188	0.0177569	0.0201578	0.0375995	0.0123565	0.0168718	0.0135793	0.0160589	0.00892415	0.00139372		637.437	0.43947
		637.828	0.0240853	0.00366921	0.0171745	0.0315299	0.0169964	0.0244607	0.0232333	-0.0177683	0.0210724	0.0177914	0.0263641	0.0224943	0.0117279	0.022456	0.0217329	-0.00195194	0.00343006	0.0299361	0.0153106	0.00707069	0.0244521	0.00130993	0.00615252	0.0128517	0.015572	0.00596496	0.0186063	0.0164981	0.00747748	0.0312646	0.012867	0.0136	0.0146253	0.0145765	0.00577595	0.0231343	0.0260896	0.027298	0.0140209	0.023061	0.0152515	0.0158845	0.00989831	0.00154586		637.828	0.441988
		638.219	0.020032	-0.00224854	0.020283	0.0399383	0.0239352	0.0149005	0.0224499	0.0308693	0.0228225	0.017882	0.021139	0.0224265	0.0212171	0.0171382	0.0326733	0.0195612	0.00759017	0.0406069	0.0142421	0.00803396	0.0206409	0.0177163	0.00544012	0.00718413	0.0195723	0.00831488	0.019096	0.00793035	0.0341925	0.0190615	0.0179078	0.0187481	0.00263855	0.00903636	0.0179426	0.0204416	0.0131239	0.0302092	0.00674494	0.0197349	0.0135912	0.0181649	0.00928283	0.00144973		638.219	0.453488
		638.61	0.0233133	0.00469713	0.0200296	0.0211854	0.0179068	0.0186461	0.0234716	-0.00230239	0.0219887	0.0154484	0.0199903	0.0182309	0.0170781	0.0246711	0.0287535	0.0184586	0.0124529	0.0218248	0.00838244	0.00957411	0.0189035	-0.000399178	0.0128077	0.00700992	0.0168644	0.00919578	0.0211717	0.0153375	0.00373288	0.0366588	0.018109	0.0159772	0.0193395	0.0174893	0.0154979	0.0148579	0.018804	0.0242014	0.00545309	0.0263258	0.0152656	0.0164977	0.00764513	0.00119397		638.61	0.404795
		639.001	0.0180891	0.0175402	0.0183363	0.0131264	0.020135	0.0293154	0.0167405	-0.00399948	0.0289569	0.0133039	0.026666	0.0189881	0.0153555	0.0186347	0.0322167	0.00442884	0.00363333	0.0119594	0.0137759	0.0151108	0.022517	0.0287332	0.0145129	0.00940674	0.0097671	0.00927573	0.0221634	0.0108172	0.0147746	0.0211575	0.00627523	0.0154544	0.0220284	0.0100183	0.0063212	0.0145562	0.0162062	0.0147824	0.00574557	0.018698	0.0139637	0.0155973	0.00747999	0.00116818		639.001	0.406833
		639.392	0.0203879	0.0093117	0.0215758	0.0227059	0.00997753	0.025413	0.0198848	-0.0175147	0.0221248	0.0151054	0.0240967	0.0230617	0.0158238	0.0209298	0.0257275	0.0215224	0.00840368	0.0127964	0.00850697	0.00811336	0.0222037	0.0162628	0.0153112	0.00994975	0.0103926	0.00663145	0.0172266	0.0116521	0.00933242	0.0246959	0.0169007	0.0146899	0.0197948	0.0141331	0.00731755	0.0223801	0.0214441	0.0346644	0.00645821	0.0252573	0.00943749	0.0159534	0.00850009	0.00132749		639.392	0.427866
		639.783	0.0144632	0.0195485	0.0177294	0.0247493	0.0153009	0.0192662	0.0257245	-0.0107019	0.0164809	0.0188666	0.0188951	0.0212031	0.0147656	0.0191575	0.0162856	-0.00383098	0.00409916	0.024377	0.00847652	0.0073753	0.0157986	0.0160768	0.00247556	0.00634418	0.0095491	0.00932819	0.0179654	0.0106373	0.00525002	0.0327547	0.0103544	0.0130638	0.0231683	0.0148799	0.0122199	0.0180232	0.0199882	0.02766	0.0114774	0.0245124	0.0125968	0.0147892	0.00826944	0.00129147		639.783	0.398943
		640.174	0.0046126	0.00256884	0.0131076	0.0254096	0.0201237	0.0150662	0.0126034	-0.0191674	0.0208151	0.0165294	0.0196608	0.0207684	0.0136934	0.0126446	0.0242983	-0.014608	0.00150297	0.0068124	0.00702357	0.0117163	0.0228466	0.0139342	0.00923827	0.00477083	0.00540921	0.00316752	0.0170207	0.00647493	-0.00035223	0.0204156	0.0202798	0.0139065	0.0157482	0.011754	0.0104169	0.0165849	0.0117456	0.0265408	0.00729294	0.0139024	0.0101022	0.0116191	0.00931378	0.00145457		640.174	0.400596
		640.565	0.0170056	0.0099906	0.0102372	0.0219581	0.0167972	0.0191026	0.0248761	-7.93876e-05	0.0203906	0.0135509	0.0218488	0.0185172	0.00979796	0.0179123	0.0174056	0.00540679	0.00329811	0.0162514	0.00628315	0.00964919	0.0161292	0.0223534	0.0109578	0.00635529	0.0175515	0.00740249	0.0139398	0.00526478	0.00433405	0.0239862	0.00884472	0.0153007	0.0163936	0.0121542	0.00844917	0.0171731	0.0197799	0.0290261	0.0105898	0.0186438	0.011803	0.0140642	0.006506	0.00101607		640.565	0.409669
		640.956	0.0142043	0.0268579	0.0219734	0.0241472	0.0129335	0.0139455	0.0201149	-0.000700708	0.0199392	0.0122277	0.0217302	0.0185867	0.0161885	0.0195303	0.0162606	0.0239224	0.00452441	0.0181278	0.00261577	0.00720076	0.0128881	0.0193057	0.00611195	0.0143213	0.00534652	0.00437017	0.0230379	0.00971682	0.0104998	0.0350677	0.00986238	0.0153751	0.0224973	0.0106788	0.00439306	0.0147065	0.0182475	0.0301194	0.00531943	0.009816	0.0148293	0.0148986	0.00777137	0.00121368		640.956	0.421329
		641.348	0.0164538	0.0114511	0.0027366	0.0163162	0.0158642	0.00652873	0.0173791	-0.00506847	0.0232703	0.01894	0.0199333	0.0234789	0.0158863	0.0161551	0.025115	0.00617541	0.00831704	0.0148585	0.00554888	0.0110535	0.0192778	0.0187693	0.00255903	0.00515726	0.0136187	0.00451159	0.0179734	0.0117431	0.0170973	0.015193	0.00886837	0.01599	0.0136826	0.00933557	0.00856667	0.0175645	0.0210605	0.0252128	0.00664287	0.0145307	0.0104006	0.0133695	0.00666873	0.00104148		641.348	0.424323
		641.739	0.00852466	-0.00171014	0.0202975	0.0212167	0.0146347	0.0304945	0.0147092	0.0123858	0.0193895	0.0136954	0.0175823	0.0136221	0.0193546	0.0086753	0.0361374	0.0146885	0.00323378	0.0291258	0.00963249	0.00636236	0.0128976	0.0188085	0.00966209	0.00839194	0.0141939	0.0108744	0.0129947	0.0017392	0.0183296	0.0202731	0.0184783	0.0158957	0.0181722	0.0121309	0.00675229	0.016934	0.0148276	0.0225232	0.00698289	0.016065	0.00907925	0.0145868	0.00731246	0.00114201		641.739	0.376744
		642.13	0.0217005	0.00547406	0.0153604	0.0222795	0.0264665	0.0332927	0.0196631	-0.000870472	0.0217926	0.0220419	0.022754	0.0170746	0.0124529	0.0296693	0.0112231	0.00898108	-0.000201757	0.000671491	0.00527748	0.00299299	0.0174624	0.00690753	0.0129266	0.00908194	0.0124412	0.00913312	0.0181486	0.00846708	0.00790933	0.0203342	0.0339107	0.0129321	0.010573	0.00934831	0.0108987	0.0160468	0.0110481	0.0281494	0.00891828	0.0206765	0.0124802	0.0145339	0.00856196	0.00133715		642.13	0.385554
		642.521	0.018129	-0.000669317	0.0195096	0.0215061	0.0147059	0.0124817	0.0232131	0.0166902	0.0236459	0.0167593	0.0187086	0.0179435	0.0137045	0.0177957	0.0149562	-0.00757432	0.00716889	0.0415675	0.00739092	0.00843852	0.0172887	0.0132795	0.0094952	0.01228	0.0113105	0.00514602	0.0157937	0.00813448	0.00565587	0.0151317	-0.0088456	0.0131713	0.0104794	0.0135229	0.0104154	0.0203482	0.0117523	0.0190226	0.00546229	0.0234759	0.0155553	0.0135109	0.00843488	0.00131731		642.521	0.388564
		642.912	0.0192625	-0.0014887	0.017264	0.0308962	0.0193621	0.0184393	0.023824	-0.00726018	0.0322782	0.0092859	0.0198535	0.0184424	0.013112	0.018023	0.0321294	0.00652329	0.00260756	0.0296038	0.00936526	0.0111816	0.0113929	0.0179411	0.0117487	0.00883999	0.00791971	0.00858329	0.0222769	0.00562942	0.0108711	0.00903302	0.0140061	0.0113331	0.0138839	0.0121653	0.0114172	0.018607	0.0158756	0.0139902	0.0105008	0.0314244	0.0153234	0.0147675	0.00855965	0.00133679		642.912	0.406562
		643.303	0.0236592	0.000884143	0.016266	0.0109624	0.0136059	0.0162399	0.0211462	0.0116312	0.019836	0.0183331	0.0243264	0.0181517	0.0117455	0.0151311	0.0171763	0.0191644	0.0104374	0.0180741	0.00600225	0.00326693	0.00900157	0.0202914	0.0197681	0.0107024	0.00948337	0.00624912	0.00912906	0.0137142	0.00510099	0.0229266	0.0123126	0.0134846	0.0172281	0.0124949	0.00736135	0.020952	0.0177765	0.0255882	0.00841986	0.0147758	0.0123026	0.0142708	0.00590587	0.000922342		643.303	0.394024
		643.694	0.0218069	0.00605841	0.0181295	0.037875	0.0137754	0.0337998	0.0155631	0.00872434	0.0196452	0.0168871	0.0270699	0.0175865	0.0153201	0.015379	0.0232399	0.00821224	0.00401051	0.0216137	0.00541906	0.0131423	0.0235186	0.00826999	0.00507246	0.0145988	0.014639	0.00924963	0.0185213	0.00625669	0.0129777	0.0302185	0.0113899	0.0155491	0.023942	0.0122228	0.00238631	0.025629	0.0191832	0.029328	0.00836703	0.020934	0.0113042	0.0162638	0.00826842	0.00129131		643.694	0.397567
		644.085	0.0215168	0.0185197	0.0186579	0.0220993	0.0167289	0.0164389	0.0227193	0.0132001	0.0224735	0.0156519	0.0141669	0.0169455	0.0146024	0.019487	0.021577	0.0159059	-0.000255632	0.0199147	0.00365596	0.00813432	0.00979681	0.018134	0.0134269	0.0103851	0.0100369	0.00622313	0.0186792	0.0126283	0.0148983	0.0336004	0.0112866	0.0123009	0.0173172	0.011369	0.00104712	0.0196261	0.0176628	0.0273219	0.00426522	0.0154023	0.0110467	0.0150877	0.00665745	0.00103972		644.085	0.367116
		644.476	0.022117	0.0120612	0.0122215	0.024347	0.0210954	0.0187939	0.017331	-0.0123555	0.0276902	0.0192195	0.0177408	0.0140034	0.0123434	0.00788199	0.0323993	0.0273583	0.0038508	0.0183612	0.00299632	0.0122532	0.0186371	0.0136532	0.0127391	0.0100096	0.0104883	0.00671642	0.0138706	0.0105055	0.0116373	0.0147378	0.0207841	0.012988	0.00563788	0.0122982	0.00109679	0.0134847	0.0219024	0.026955	0.00814441	0.0263592	0.0103268	0.0145045	0.00829451	0.00129538		644.476	0.37786
		644.867	0.0204472	0.00823127	0.0133148	0.0296308	0.0116552	0.0193093	0.0223169	0.000972446	0.0140466	0.012381	0.0147557	0.0205774	0.0159422	0.0158366	0.0243224	0.000310133	0.00412738	0.00421717	0.00283199	0.00801272	0.0191277	0.0211483	0.0100714	0.00869871	0.00923339	0.00797077	0.0176454	0.0107414	0.00430084	0.0252508	0.00992946	0.0142899	0.0111065	0.0134878	0.00970653	0.0205578	0.0101736	0.0315981	0.00458235	0.016229	0.0121257	0.0134443	0.0073479	0.00114755		644.867	0.355404
		645.258	0.0187489	0.0105436	0.0123234	0.00706253	0.0148758	0.0109537	0.0276365	0.00760301	0.0232133	0.0123084	0.0225675	0.0195122	0.0121462	0.013794	0.036587	0.0219559	0.00304331	0.0311247	0.0050605	0.00690192	0.0187823	0.0195712	0.0105915	0.00671372	0.0120741	0.0085148	0.016066	0.00664571	0.0152747	0.0195576	0.0140416	0.0143804	0.0166972	0.0147961	0.00900297	0.0166831	0.0166165	0.0285506	0.0104011	0.00756827	0.0127745	0.0149577	0.00724943	0.00113217		645.258	0.37237
		645.649	0.0149061	0.0247879	0.0151283	0.0349541	0.0203626	0.0108658	0.0188558	0.0212815	0.0163801	0.00860485	0.01952	0.016066	0.0164327	0.0131031	0.0241634	0.0105456	0.00646438	0.0211889	0.00302285	0.00847775	0.0199057	0.00566705	0.0048544	0.00918404	0.0125743	0.00665842	0.0145385	0.00779206	0.00451656	0.0169893	0.0199301	0.011545	0.0166116	0.012437	0.00458499	0.0148688	0.0137332	0.027929	0.0126117	0.0181343	0.0125749	0.0144574	0.00678336	0.00105938		645.649	0.359313
		646.04	0.0179773	0.0241972	0.0120305	0.0244304	0.0160402	0.0151713	0.0246149	-0.0122427	0.0286347	0.00913169	0.0196319	0.0169729	0.0122915	0.0171932	0.0182965	-0.0113099	0.00556941	0.0196856	0.00636897	0.0164139	0.0131635	0.012656	0.0149627	0.0103486	0.0122616	0.00917988	0.0161924	0.00839366	0.0144401	0.0190364	0.00847343	0.0116333	0.015342	0.013171	0.0112062	0.0131785	0.00817253	0.0242149	0.00881499	0.0192735	0.00927582	0.0135242	0.00783268	0.00122326		646.04	0.353
		646.432	0.0183716	0.0139441	0.00956324	0.0156437	0.0153979	0.0236086	0.0124226	-0.0197814	0.0216548	0.00998979	0.0214489	0.0113915	0.0132195	0.0167316	0.023298	-0.00398499	0.0061527	0.0312999	0.00182484	0.010809	0.0107745	0.0122007	0.00805127	0.00819726	0.00575044	0.0112623	0.0162872	0.0045183	0.00752742	0.0116412	0.00417128	0.0134871	0.0115205	0.013753	0.00783821	0.0142682	0.00989993	0.0316071	0.00345406	-0.00180963	0.0102162	0.0114054	0.00886475	0.00138444		646.432	0.349931
		646.823	0.00793252	0.0148341	0.0142384	0.0334629	0.0198925	0.0198693	0.0222474	-0.00660874	0.0222804	0.00822435	0.0197743	0.0144405	0.009054	0.0166005	0.0336679	0.00726305	0.00613936	0.0214387	0.00476875	0.00757265	0.0110691	0.0228755	0.00321895	0.0100951	0.0150065	0.00641535	0.0136244	0.00880304	0.00548657	0.0111702	0.0155544	0.011356	0.0137378	0.0122971	-0.00155972	0.0146469	0.0217348	0.012727	0.00483361	0.017281	0.0127361	0.0131757	0.00794911	0.00124144		646.823	0.348012
		647.214	0.0232827	0.00886438	0.0145667	0.0307972	0.0159484	0.0154531	0.00804269	-0.00469688	0.0199866	0.010274	0.0185452	0.0190371	0.0142742	0.0234286	0.0215331	-0.0157963	0.00452103	0.0137676	0.00813658	0.0045486	0.0153775	0.00805027	0.00676328	0.0114266	0.0114579	0.0054522	0.016238	0.00586362	0.00409178	0.0166619	-0.000112859	0.0145021	0.0122582	0.0103372	0.00541673	0.0186048	0.0138616	0.0245017	0.00391499	0.0175485	0.0133876	0.0119541	0.0083305	0.00130101		647.214	0.352688
		647.605	0.0155637	0.0176476	0.0142659	0.0266992	0.00883086	0.021252	0.0161138	0.0139506	0.022957	0.0149383	0.0130655	0.0155135	0.010643	0.0212856	0.0172972	0.0196703	0.0101623	0.00884138	0.0053303	0.00993065	0.0157128	0.0169085	0.0186681	0.00506774	0.00970593	0.00725674	0.0194776	0.00575848	0.000700789	0.0150909	0.0259723	0.014802	0.0134092	0.01092	0.00840094	0.0163797	0.014775	0.0332374	0.0153226	0.032076	0.0103299	0.0149739	0.00681287	0.00106399		647.605	0.346435
		647.996	0.00954753	0.00251077	0.00927793	0.0297258	0.0152014	0.0235023	0.0108176	-0.00910308	0.0135301	0.0117862	0.0190241	0.0162955	0.0135377	0.0148598	0.00849426	0.00856518	0.00356436	0.00341619	0.00663992	0.00818247	0.0136998	0.0251143	0.00271727	0.00403401	0.00669321	0.00584072	0.0163119	0.0117511	0.0167074	0.0403334	0.0104589	0.0124768	0.0199605	0.00764871	0.00137509	0.0189757	0.0125273	0.023723	0.00478338	0.023766	0.0104846	0.0124088	0.00870133	0.00135892		647.996	0.346709
		648.387	0.0111834	-0.00216201	0.0160996	0.0283625	0.0129913	0.0201441	0.0116775	0.018099	0.0160126	0.0129264	0.026318	0.0137948	0.0159976	0.0213117	0.0223725	-0.0210926	0.00471267	0.0145612	0.0110259	0.00485321	0.0174012	0.0213483	0.00196496	0.00508496	0.00812404	0.00698964	0.0162992	0.0105822	0.0125665	0.025408	0.0117334	0.0129761	0.0157534	0.00800138	0.0124404	0.0153951	0.0185255	0.0240457	0.00844571	0.0119288	0.0121231	0.0130811	0.00845891	0.00132106		648.387	0.34125
		648.778	0.0141328	0.00701275	0.0108547	0.0249495	0.0109851	0.0212519	0.0248162	0.0089337	0.0105128	0.0172173	0.0178613	0.0113618	0.0167804	0.0213594	0.0213119	0.00211807	0.00884933	0.00431235	0.00540563	0.00222551	0.00646547	0.00451973	0.0100817	0.00910045	0.00884996	0.00697834	0.0170562	0.00507345	0.0126188	0.0234679	0.0133537	0.015495	0.00853269	0.00883844	0.00404726	0.0115941	0.0113833	0.0250342	0.00571909	0.00827578	0.00877109	0.0118905	0.00643545	0.00100505		648.778	0.33899
		649.169	0.0159206	-0.00149287	0.0114794	0.0271693	0.0151464	0.0132675	0.0151522	-0.0121647	0.024379	0.0127743	0.0257954	0.0142507	0.01164	0.0260399	0.0117179	0.00480945	0.0115702	0.0337707	0.00559766	0.00217449	0.0136005	0.00155138	0.00544238	0.00630934	0.00948185	0.00480968	0.0160132	0.00367861	0.00416488	0.0299564	0.000599559	0.0125082	0.0194471	0.00963704	0.00518946	0.0111844	0.0107647	0.0205913	0.00681411	0.0159607	0.0100114	0.0118711	0.00899452	0.00140471		649.169	0.319882
		649.56	0.0110576	0.022663	0.0164692	0.0216261	0.00933499	0.0304403	0.0136853	0.016775	0.0169804	0.0162589	0.0187992	0.0147229	0.0128068	0.00924413	0.0110441	0.0083899	-0.00217006	0.0234063	0.00397123	0.00899652	0.0125576	0.0141847	0.00660409	0.0099884	0.00795661	0.00361828	0.013718	0.00208606	0.0047263	0.0181545	0.0145251	0.0121561	0.0146797	0.0102176	0.00398201	0.0128451	0.0119094	0.0187142	0.0118093	0.0215579	0.0110481	0.0127205	0.0063205	0.000987097		649.56	0.327135
		649.951	0.0129859	0.00932535	0.0135566	0.0256534	0.00933351	0.0233917	0.0165907	-0.00767136	0.0213465	0.0105909	0.0181789	0.0131847	0.0110272	0.0124045	0.0140046	-0.00384659	0.00610366	0.0102415	0.00802618	0.00613693	0.0130045	0.00930523	0.00282814	0.0118273	0.00626831	0.00749507	0.015241	0.0123067	-0.00372717	0.0149394	0.01392	0.0127698	0.00996677	0.00889484	0.00508267	0.0108074	0.0110894	0.0207929	0.00300624	0.00549866	0.0110402	0.0105591	0.0066473	0.00103813		649.951	0.315796
		650.342	0.0129603	-0.00303124	0.0165169	0.0288805	0.0157176	0.0213867	0.0132794	-0.0117361	0.00642829	0.0163213	0.0219594	0.0170564	0.0106287	0.0122476	0.0294684	0.00136972	0.0104655	0.0154543	0.00471276	0.00292002	0.0165864	0.0183537	0.0053055	0.00434324	0.0107516	0.00625849	0.0127019	0.00573755	0.00658015	0.0203363	0.0181287	0.0125727	0.0163174	0.0109047	0.00702224	0.0177596	0.00971881	0.0226498	0.00850127	0.0224241	0.00995653	0.0123394	0.00801856	0.00125229		650.342	0.310531
		650.733	0.0112919	-0.0027876	0.0136812	0.0250091	0.0183143	0.0151393	0.0178932	0.00103751	0.0249196	0.0184817	0.0151653	0.0161809	0.00837055	0.0125364	0.00908247	-0.0355478	0.00854078	0.00475874	0.00419706	0.00517842	0.0141662	-0.0021588	0.0139199	0.00395216	0.00604684	0.00694488	0.0138159	0.00821229	-0.000716853	0.00913235	0.0023385	0.00993393	0.0125303	0.00774676	0.0142298	0.0188194	0.0124033	0.0222451	0.0068457	0.014739	0.00645729	0.00958651	0.00976259	0.00152466		650.733	0.314601
		651.125	0.0130718	0.00613665	0.00615768	0.0257869	0.0123773	0.0155327	0.0141673	0.00615139	0.0111286	0.00863744	0.0202018	0.0171145	0.0125395	0.00804633	0.0802411	0.0048151	0.0089244	0.0251649	0.00369533	0.00176279	0.0118616	0.023037	0.00807093	0.00841293	0.00616641	0.00209038	0.0263561	0.0146255	0.00320889	0.0472976	0.00540624	0.0101811	0.00781961	0.0100707	-0.0016972	0.0149209	0.013165	0.0224263	0.0051778	0.0183781	0.00730533	0.0138033	0.0136743	0.00213556		651.125	0.328652
		651.516	0.0126507	0.0174443	0.0121117	0.0271566	0.011237	0.0221155	0.018125	0.00772622	0.0136087	0.00905146	0.0107173	0.0136063	0.0120565	0.0143845	0.0139101	0.000296097	0.00463063	0.01345	0.00420644	0.00768707	0.00471523	0.00696934	0.00466095	0.00231786	0.00104924	0.00721629	0.0165035	0.00741171	0.00929009	0.00605289	-0.00959908	0.00698565	0.00470049	0.0124142	0.0100668	0.0113558	0.0150879	0.0303765	0.00829377	0.0165335	0.0101442	0.0104566	0.00699382	0.00109225		651.516	0.281237
		651.907	0.0188621	0.0033644	0.00656453	0.0236736	0.0162765	0.0188445	0.0130556	0.0104877	0.017185	0.0143393	0.0203667	0.0158847	0.016187	0.00513051	0.0176935	-0.00853314	0.00788677	0.0231633	0.00768696	0.012145	0.0187098	0.0104113	0.00908491	0.0110178	0.00817357	0.00647351	0.00861351	0.00622023	0.0109881	0.0133856	0.0156087	0.0116597	0.0127108	0.0122131	0.00996712	0.0150618	0.0134355	0.0216518	0.008412	0.0114215	0.0105477	0.0123423	0.00591672	0.000924037		651.907	0.3115
		652.298	0.0192017	0.0111378	0.0116106	0.0197273	0.011371	0.0249313	0.0203714	-0.00659926	0.0189573	0.0145271	0.0166544	0.0065561	0.00938086	0.00924257	0.015818	0.00312069	0.00373628	0.0058853	0.00300056	0.00372091	0.0169458	0.0120637	0.0104975	0.00632757	0.00594692	0.00532229	0.0140526	0.00198737	0.00511677	0.0214939	0.00384137	0.0132348	0.00936008	0.0106932	0.0144171	0.010942	0.0141852	0.0151804	0.0099093	0.0209683	0.0117081	0.0111353	0.00643966	0.00100571		652.298	0.341164
		652.689	0.00587352	0.00615624	0.00883276	0.00840696	0.0126026	0.022378	0.0196013	0.00914365	0.0148324	0.0128319	0.0181813	0.0122696	0.00982221	0.0141921	0.0130872	0.00449936	0.00429328	0.0241148	0.00473869	0.00378799	0.0137853	0.0196287	0.00691463	0.00827576	0.0125207	0.00705914	0.0111363	0.00834804	0.0138476	0.0236722	-0.00444887	0.0112489	0.0178592	0.0087758	0.0133906	0.0188008	0.014473	0.021386	0.00540695	0.0127783	0.00874932	0.0117867	0.00604759	0.000944475		652.689	0.322589
		653.08	0.0105822	0.0178156	0.0145101	0.0268214	0.0170022	0.0209061	0.0179765	0.00319331	0.0157704	0.00937722	0.0142223	0.0140568	0.0146988	0.00910459	0.0268091	0.004138	0.0084306	0.0184994	0.00495496	0.0149477	0.0082688	0.00709657	0.00087425	0.00546649	0.00759582	0.00744585	0.0118469	0.0047247	0.00660724	0.00901018	0.0211117	0.012519	0.0114256	0.00800683	0.0153546	0.0199162	0.0127385	0.0257797	-0.000213487	0.0175163	0.0104329	0.0123742	0.0066177	0.00103351		653.08	0.298057
		653.471	0.00972991	0.0135294	0.0125644	0.0212444	0.00746379	0.013778	0.0211789	0.00536089	0.0179907	0.0121329	0.0168864	0.0125144	0.00940758	0.021311	0.0231338	0.00638462	0.00983551	0.00933847	0.00205945	0.0129346	0.0137306	0.0097688	0.00425912	0.00449636	0.00158625	0.0045047	0.0125321	0.00973604	0.00643004	0.0222995	0.00158841	0.0115459	0.00703774	0.0089979	0.00544745	0.0124438	0.0173308	0.0164878	0.00721782	0.00225887	0.0104757	0.0109501	0.00585581	0.000914524		653.471	0.280721
		653.862	0.00263579	0.00472013	0.00808095	0.0169978	0.0111425	0.0134899	0.0118817	-0.0107668	0.0201527	0.0100653	0.0122492	0.0167126	0.0106168	0.0112982	0.01358	-0.00494901	0.000408783	0.0246482	0.00383006	0.00507443	0.0170325	0.0109833	0.0117274	0.00960895	0.00855217	0.00481778	0.0132689	0.00431273	0.00720119	0.0125721	0.0206015	0.0108396	0.0133749	0.0093638	0.0040057	0.00679989	0.0163825	0.0189446	0.0119085	0.0156409	0.0120929	0.0102903	0.00664734	0.00103814		653.862	0.288234
		654.253	0.0132912	-0.00107602	0.00995089	0.033271	0.014451	0.0189956	0.0177124	0.0087539	0.0088596	0.00713026	0.0166098	0.015812	0.00885941	0.0114034	0.00624159	0.0154391	0.00520853	0.0139356	0.00208482	0.00433095	0.0164521	0.0197489	0.00562228	0.000270843	0.00395058	0.0055177	0.00937674	0.0115916	0.011531	0.0191535	0.00995839	0.00836439	0.00998307	0.0101581	0.00816444	0.0091628	0.0194974	0.020999	0.00670126	0.0143911	0.00996448	0.011264	0.00640671	0.00100056		654.253	0.296209
		654.644	0.0155283	0.0102021	0.00654022	0.0196725	0.0149924	0.0116083	0.014991	0.015581	0.014337	0.0136854	0.0171199	0.0187638	0.00910801	0.016958	0.0167754	-0.00130289	-1.73876e-05	0.0196955	0.00877356	-0.0014576	0.0246328	0.0121672	0.00995634	0.00462791	0.0117807	0.00602752	0.0111075	0.00860713	0.0177471	0.0252807	0.00589249	0.0130209	0.0222392	0.011463	0.00998268	0.0129834	0.00853523	0.0174761	0.00833994	0.0188338	0.00977395	0.0124885	0.00617768	0.000964791		654.644	0.27625
		655.035	0.0163892	0.0127221	0.010245	0.0157993	0.0100213	0.0131462	0.0165772	0.00137261	0.0205723	0.0108494	0.012565	0.0154489	0.0119243	0.00478498	0.0165982	-0.00196684	0.00747017	0.01269	0.00714503	0.0111236	0.0162922	0.00937913	0.00814713	0.00457713	0.00870335	0.00479141	0.00765145	0.000757848	0.0104274	0.0208414	0.00602523	0.00881559	0.00366192	0.0086415	0.00812615	0.0145365	0.0133714	0.0179233	0.00424636	0.0158126	0.00894818	0.0104184	0.0052441	0.000818991		655.035	0.289347
		655.426	0.0218702	0.00746894	-0.0118987	0.0052205	-0.00234163	0.0129157	0.0146827	0.0113514	0.0160497	0.00768017	0.020218	0.0123578	0.00538284	0.0122305	0.024808	0.00113118	0.00592857	0.0103383	-0.000312124	-0.00377954	0.0227152	0.0165636	0.0106928	0.00881325	0.00501607	0.00416609	0.00675466	0.00536492	0.00698465	0.0123393	0.00397255	0.00969369	0.00383583	0.00851449	0.00547312	0.0143282	0.00714552	0.0474076	0.00504295	0.0103	0.0126955	0.0097347	0.00922328	0.00144043		655.426	0.277622
		655.817	0.00583013	-0.0029765	0.0127014	0.0105246	0.00841555	0.0208859	0.00993552	0.0037057	0.0207204	0.0147375	0.016106	0.0148259	0.0112727	0.0128074	0.0260933	0.00666617	0.0068004	0.0253067	0.00544129	0.0154424	0.0144225	0.0169548	0.00794177	0.00743286	0.00740553	0.00382076	0.013217	0.00309237	0.000498272	0.0224121	0.00749356	0.0100513	0.00878859	0.0108203	0.00807243	0.010539	0.0100712	0.0313588	0.0041789	0.00922461	0.0132733	0.0113735	0.00696514	0.00108777		655.817	0.300379
		656.209	0.0105543	0.0186734	0.0114444	0.0181979	0.00942506	0.0118684	0.00978861	-0.0115866	0.0120024	0.0159712	0.0155211	0.0119698	0.0120945	0.0100386	0.0108845	0.0233697	-0.00195	0.000668555	0.00781329	-0.00205695	0.00833232	0.0146269	0.0108099	0.00696366	0.00811941	0.00604615	0.0106822	0.00597795	0.00792798	0.0193418	0.00573813	0.0114805	0.0166597	0.005209	0.00273712	0.0109636	0.013984	0.0175542	0.000223683	0.0145963	0.00794189	0.00977094	0.0065279	0.00101949		656.209	0.253617
		656.6	0.00412082	0.00234115	0.00373493	0.0240754	0.00575107	0.0132757	0.0185643	-0.000766925	0.0180286	0.0095707	0.01355	0.0115085	0.0122634	0.0189846	0.0280071	-0.000315214	0.00503126	0.00897233	0.00784564	0.00726561	0.0157011	0.00950205	0.00560723	-0.000371196	0.00550403	0.00584408	0.0118715	0.00941188	0.0160442	0.0161084	0.0150175	0.0104601	0.0137074	0.00971249	0.0177187	0.00558166	0.0109363	0.0178429	0.00518819	0.00800201	0.00777328	0.0104627	0.00636559	0.000994138		656.6	0.271203
		656.991	0.00958487	0.0170743	0.00558897	0.035587	0.00840801	0.016328	0.0117799	-0.0100736	0.019491	0.0160272	0.0167371	0.0112737	0.00753055	0.00861901	0.0252057	0.00771595	0.0022481	0.0233103	0.00573219	0.00443473	0.0152541	0.0125331	0.00953087	0.01021	0.00581376	0.00369526	0.0146452	0.00834468	0.0103521	0.0109856	0.0176376	0.00956208	0.0133803	0.0075353	0.0108459	0.00303843	0.0154525	0.010783	0.00661795	0.0148425	0.00954121	0.0112977	0.00718389	0.00112194		656.991	0.289306
		657.382	0.0141153	0.0155039	0.00849416	0.000386729	0.0104704	0.0127436	0.0141818	-0.00676767	0.0213059	0.0101636	0.0124208	0.014447	0.00966897	0.015096	0.0173251	0.0114714	0.0220409	0.0187637	0.00708488	0.0114526	0.0152381	0.0176157	0.0132673	0.0060266	0.0101127	0.00304154	0.0116506	0.00893875	0.00016632	0.0147964	-0.00767521	0.0095916	0.00652266	0.0119711	0.00898248	0.0173511	0.014856	0.0084417	0.00723462	0.0248889	0.00728209	0.010992	0.0066369	0.00103651		657.382	0.24853
		657.773	0.0177263	0.00621558	0.0169724	0.0175079	0.0136998	0.0128634	0.0143596	0.0148153	0.0119325	0.0103659	0.0119639	0.0136818	0.0111727	0.00491807	0.0125139	0.00579871	0.00506202	0.00926255	0.00646688	0.00471154	0.00851054	0.0117255	0.00956679	0.0098557	0.0037938	0.00512625	0.0127154	-0.000326753	0.00215872	0.0212993	0.0060437	0.0109837	0.0149899	0.00782802	0.00337371	0.0115829	0.00745302	0.0193022	0.00622728	0.0225138	0.0091867	0.0103883	0.00518614	0.000809939		657.773	0.280005
		658.164	0.0162536	0.00287536	0.0101659	0.0113247	0.00873554	0.0138975	0.00767595	-0.00190259	0.0207207	0.0126083	0.0173344	0.0131118	0.0126017	0.0132467	0.0221036	0.00536421	0.00703375	0.0116037	0.00134552	0.0053963	0.00805878	0.0169849	0.00413597	0.00310142	0.00548255	0.00552913	0.0149328	0.00141088	0.00161703	0.0167614	0.00371026	0.0123386	0.0184271	0.00682654	0.000933049	0.015327	0.0133039	0.0207622	0.00739741	0.00206434	0.00693788	0.0096961	0.00617093	0.000963738		658.164	0.259708
		658.555	0.0155652	0.0190662	0.00914882	0.00955305	0.0133269	0.0133218	0.0113508	-0.00559862	0.0133012	0.0131014	0.016245	0.0137226	0.0102604	0.00225407	0.00840038	0.00319604	0.00555051	0.0124278	0.00957192	-0.00210376	0.00913414	0.0115762	0.0053283	0.00309135	0.00844426	0.00429548	0.0156334	0.00645874	0.0128617	0.0205824	0.0126035	0.00762163	0.00310466	0.00660565	0.0109745	0.00738253	0.0139743	0.0131414	0.00673161	0.0176955	0.00874191	0.00969865	0.00536688	0.000838165		658.555	0.264616
		658.946	0.0257183	0.00805677	0.0123482	0.0339042	0.011069	0.0306412	0.0129229	-0.00418989	0.0160117	0.0115492	0.0135486	0.0133023	0.0191518	0.0157614	0.0122914	0.00442346	-0.000739819	0.00153192	0.00245645	0.0112947	0.00532975	0.0455544	0.0310672	0.00300372	0.00469756	0.00599706	0.00790595	0.0149056	0.0145264	0.0141571	0.0193113	0.0109941	-0.00344522	0.00233359	0.00849192	0.015685	0.0129533	0.0125187	0.00246289	0.00879051	0.00985739	0.01215	0.00995177	0.00155421		658.946	0.260192
		659.337	0.00454892	0.0275246	0.00746365	0.0173328	0.0101419	0.00517464	0.0152814	-0.00873013	0.0187783	0.0150455	0.0142774	0.0159231	0.00988511	0.0101282	0.0103671	0.00376455	0.00353853	0.0110223	0.00475677	0.00503982	0.0104062	0.00590081	0.00772097	0.00847522	0.0111828	0.00165151	0.0124861	0.00678242	0.00869927	0.0098823	0.0145891	0.00718106	0.00303834	0.00790597	0.00273162	0.0137139	0.0110592	0.0241173	0.00469272	0.0245317	0.00450346	0.00981747	0.0066622	0.00104046		659.337	0.245136
		659.728	0.0138463	0.00923561	0.00677199	0.0201473	0.0105158	0.0142949	0.0107182	-0.00141801	0.0058902	0.00504256	0.0190208	0.0118791	0.0113416	0.0151168	0.0174536	-0.00827097	0.0127492	0.00259593	0.00337775	0.0115533	0.0152495	0.00288931	0.00261056	0.00358903	0.00501349	0.00601305	0.0146256	-0.00237939	0.00864537	0.0183791	0.0046988	0.0106509	0.0088902	0.00633963	0.00251887	0.0098631	0.0118015	0.0165898	0.00209014	0.0157806	0.00779935	0.00886636	0.00621951	0.000971324		659.728	0.239282
		660.119	0.0128752	0.0210739	0.00951896	0.0148059	0.00516181	0.0175798	0.0133992	-0.00508608	0.00489116	0.01176	0.00979005	0.00921727	0.00965791	0.000972633	0.0144016	0.0130084	0.00790792	0.0170774	0.00433952	0.00264378	0.0125141	0.0185897	0.00458122	0.00544289	0.00661581	0.00563656	0.0117994	0.00317316	-0.00174307	0.0115829	0.000373888	0.0123239	0.00739599	0.0104447	0.00693286	0.0168662	0.0115972	0.0133725	0.0100431	0.0157748	0.00838178	0.00943161	0.00563949	0.00088074		660.119	0.23644
		660.51	0.0116624	-0.00675826	0.0076009	0.021045	0.00708766	0.0175938	0.0143222	0.0140383	0.0122206	0.00419648	0.0109539	0.010697	0.0108983	0.0142643	0.0111171	-0.0014507	0.00687722	0.017879	0.00813537	0.00301018	0.0104221	0.0155236	0.00756741	0.00640238	0.00659501	0.00279446	0.0118329	0.00386955	0.00679492	0.0190456	0.0108182	0.0105955	0.0146966	0.00414255	-0.00172667	0.00835829	0.00710554	0.0211319	0.00695111	0.018239	0.00739117	0.00960834	0.0060116	0.000938854		660.51	0.255088
		660.902	0.0121142	0.00594084	0.00930796	0.0261874	0.005586	0.0106949	0.0133169	0.0253987	0.00901815	0.0104934	0.0146526	0.0145919	0.00991183	0.0173669	0.00905187	0.0134857	0.00484509	0.00220254	0.00209343	0.00270006	0.0153256	0.00536143	0.0085143	0.00862062	0.00653765	0.00528688	0.0165331	0.00372473	0.0105157	0.0200354	0.0122043	0.00975562	0.00474064	0.00830132	0.00507044	0.0094195	0.00933866	0.0110571	0.00352197	0.0125969	0.0057917	0.0100296	0.00555516	0.000867571		660.902	0.221721
		661.293	0.0113818	0.00559942	0.00700008	0.036208	0.00249666	0.00356087	0.0193015	0.0251434	0.0225821	0.00614137	0.0164068	0.0137578	0.00859501	0.00796475	-0.00316982	0.0161205	0.00584101	0.015776	0.00399349	-0.00374236	0.00404469	0.0126914	0.00818274	0.0105694	0.00667999	0.003411	0.00489472	0.0101314	0.00255669	0.00656125	0.00954075	0.0113372	0.0134227	0.0068179	0.00463685	0.0149172	0.0130937	0.0160394	0.00429273	0.0231738	0.00426537	0.0100541	0.00766289	0.00119674		661.293	0.246654
		661.684	0.00765751	0.00364674	0.012013	0.00996228	0.0123564	0.00348406	0.00891669	-0.0123976	0.0190399	0.0101074	0.0127083	0.0108753	0.00909222	0.00254848	0.0164746	0.00715808	0.00333677	0.012592	0.0018083	0.00412273	0.0129092	0.0155854	0.00131453	0.00387153	0.00366505	0.00477616	0.00687346	0.0104262	0.00380094	-0.00217947	-0.000805511	0.0121768	0.0029234	0.00985695	0.00354414	0.0109061	0.00876714	0.0201216	0.00532038	0.0175189	0.00794101	0.00767846	0.00614112	0.000959082		661.684	0.256294
		662.075	0.0131758	0.0116567	0.0131053	0.0231602	0.0115651	0.00373647	0.011171	0.0053325	0.00595065	0.012312	0.0206323	0.0113806	0.00743703	0.00957679	0.00634887	0.00397033	0.00417779	0.0100137	0.00264174	0.0103234	0.0131937	0.0127486	-0.00132441	0.00649847	0.00376382	0.00426383	0.0113337	0.00341881	0.000742029	0.0156051	0.0367715	0.00840238	0.0173524	0.00271614	0.0334897	0.0137455	0.0144264	0.0133121	0.00862849	0.00103954	0.00956831	0.0104235	0.00770142	0.00120276		662.075	0.22823
		662.466	0.0188303	0.00831045	0.00838202	0.0126783	0.00626107	0.0170314	0.0111352	-0.00545551	0.00862294	0.00445429	0.0120538	0.00833144	0.00646335	0.0115014	0.00402233	-0.000529405	0.00214018	0.0160543	0.000675321	0.0129892	0.0117041	0.0113417	-0.000714649	0.00970962	0.00896047	0.00415864	0.0087873	0.00108446	0.0132044	0.008848	0.0030465	0.01055	0.00331511	0.00915976	0.0151177	0.0105616	0.0082364	0.0146017	-3.94952e-05	0.0121513	0.00632144	0.00814777	0.00531911	0.000830706		662.466	0.234712
		662.857	0.0100785	0.00618085	0.00386522	0.0121851	0.00715615	0.0146577	0.0133062	0.00286826	0.0111247	0.00619173	0.0153468	0.0077489	0.0103123	0.00899419	0.0160373	-0.0145075	0.0110318	0.00858872	0.00804247	0.00994094	0.00845969	0.0214049	0.00502632	0.00353726	0.00991809	0.00598137	0.00092818	0.00230589	0.00723222	0.00204483	0.00767246	0.00694262	0.0105743	0.007732	0.00209128	0.00926851	0.0120282	0.0133814	0.00521368	0.00328132	0.00654074	0.00782233	0.00553275	0.000864071		662.857	0.225315
		663.248	0.0112987	0.00529706	0.00851218	-0.00112661	0.00909582	0.00486729	0.00598724	-0.0044653	0.0100578	0.0118274	0.0135055	0.00773651	0.0102015	0.0154181	-0.00563239	0.00534337	0.0102507	0.0272206	0.00656238	0.00420426	0.0136045	0.0081174	0.0100263	0.00549346	0.00897224	0.00577995	0.0108373	0.000444339	0.010495	0.00452291	0.00432252	0.012492	0.0053274	0.010359	0.0122352	0.013379	0.0106735	0.0222646	0.00233562	0.00178185	0.00644101	0.00819676	0.00599154	0.000935722		663.248	0.198272
		663.639	0.0120878	-9.77778e-05	0.0118126	0.0171398	0.00347763	0.0160415	0.0150475	0.0144456	0.0253305	0.00624497	0.00926417	0.0079987	0.00845513	0.0055556	0.015037	0.00898995	0.00441925	0.0250901	0.000159446	0.00323128	0.00400929	0.00584823	0.00526959	0.000544737	0.00525185	0.00815298	0.00920675	0.0123275	0.0149423	0.0205957	-0.00275332	0.00935945	0.00706359	0.0083587	0.00885977	0.0127117	0.00831818	0.0186818	0.00378628	0.00663766	0.00730574	0.00937095	0.00629432	0.000983008		663.639	0.21812
		664.03	0.0175736	0.00601124	0.00758522	0.00282782	0.00984018	0.00991576	0.0130976	0.0181805	0.0137481	0.00930895	0.00489621	0.0132465	0.00890926	0.00832135	0.00121682	-0.0199711	0.0104238	0.00129146	0.00358056	0.00579468	0.00761695	0.0107216	0.00564998	0.00929251	0.00585704	0.00432578	0.00939213	0.00753738	-0.0020331	0.0146007	-5.64522e-05	0.00951851	0.00206875	0.00483784	-0.000172183	0.0178061	0.0106822	0.0104211	0.00517895	0.0274552	0.00329027	0.00755585	0.00716342	0.00111874		664.03	0.230567
		664.421	0.0157203	0.00636774	0.00571863	0.0117392	0.00784548	0.022503	0.0127995	0.000455991	0.0104467	0.00627598	0.012834	0.0122563	0.0107711	0.0113205	0.0172995	-0.0108087	0.00772062	-0.00308382	0.00194157	-0.000118912	0.00795568	0.0138881	0.00599839	0.00897308	0.003563	0.00476864	0.00525591	0.00196375	0.00279487	0.0089032	-0.00378868	0.007885	0.00560414	0.00751424	0.00136832	0.00988881	0.00754549	0.0167097	-0.00133011	0.00996361	0.00365715	0.0070509	0.0062269	0.000972478		664.421	0.218148
		664.812	0.00839874	0.0248281	0.00168567	0.00426805	0.00435759	0.0163709	0.0138004	0.0120828	0.00791315	0.00687794	0.0108403	0.0109634	0.0052066	0.00581189	0.00285763	-0.00328254	0.00383851	0.0183691	0.0054245	0.00390009	0.0085325	0.00799297	-0.00276898	0.00625786	0.00660383	0.0062207	0.0059137	0.00796397	0.00169924	0.0140123	-0.00318939	0.0112634	0.0121759	0.00982345	0.00163117	0.00448412	0.00840524	0.0130098	0.00571844	0.0151144	0.00616929	0.0075987	0.00562116	0.000877878		664.812	0.224153
		665.203	0.00533968	-0.00335695	0.000738853	0.00949962	0.0105567	0.0147702	0.0145545	-0.00715552	0.00582954	0.00453377	0.00929559	0.014393	0.00792234	0.0119962	0.00723962	-0.00390845	-0.00177466	0.0187736	0.00591318	0.00440107	0.0146612	0.0134482	0.00335842	0.00393294	0.00390279	0.00354703	0.0148658	0.00913283	0.000998446	0.00815938	0.0185798	0.00635394	0.0061991	0.005652	-0.00111443	0.00335725	0.0131253	0.00885338	0.013586	0.0137105	0.00882472	0.00738284	0.00607422	0.000948633		665.203	0.220719
		665.594	0.017207	-0.00450408	0.0143793	-0.00718343	0.00498846	0.00488095	0.0117736	0.0068405	0.0110322	0.00652144	0.0112865	0.00985868	0.00643393	0.0128631	0.00770337	0.000582127	5.3876e-05	0.0188725	0.000473327	0.00661493	0.010642	0.0055646	0.00411212	0.00969235	0.0104669	0.00499847	0.0082914	0.00503107	0.00597	0.0156502	0.0144546	0.0100539	0.011846	0.0114088	0.011895	0.00858549	0.0159472	0.0186312	0.00624546	0.00806157	0.00652338	0.00840853	0.00557311	0.000870374		665.594	0.210692
		665.986	0.0228124	0.0204912	0.00792418	0.00763429	0.0127311	0.00731167	0.0105684	-0.0088124	0.00825047	0.00454765	0.00330382	0.014059	0.00773275	0.00258283	0.0142814	0.0051108	0.00664019	-0.00570403	0.005104	0.00853776	0.0175462	0.0130346	0.00826975	0.00749331	0.0067044	0.00231589	0.0105142	0.0100073	0.00580287	0.0123255	0.0125805	0.00740092	0.00493138	0.00930097	0.0150443	0.0106452	0.0131926	0.0186251	0.00612242	0.0169005	0.00674734	0.00903933	0.00602355	0.00094072		665.986	0.21738
		666.377	0.0124112	-0.00450364	0.00528622	0.000756646	0.0108038	0.00238278	0.00784794	-0.0200805	0.00820223	0.00624724	0.0054575	0.00509591	0.0084043	0.008623	0.018511	-0.00104508	0.00236752	0.0158414	-0.000321311	0.00475523	0.00698919	0.00681063	0.00696603	0.00860668	0.00704905	0.00295358	0.0100408	0.0053681	0.0033718	0.00320472	0.00676801	0.0089651	0.0119547	0.00567551	0.010098	0.0114104	0.0098221	0.015334	0.00362089	0.00892863	0.00627778	0.00627461	0.00611029	0.000954267		666.377	0.221942
		666.768	0.0135409	-0.0357346	-0.00732728	0.00587369	0.00563833	-0.0101562	0.0170792	-0.00607587	0.0114806	-0.00567337	0.00988228	0.0140289	0.00627424	-0.000738025	0.0314174	0.00625196	-2.60811e-05	0.00586126	0.00424165	0.00947383	0.0118136	0.00830821	0.00257283	0.00645001	0.00188553	0.00410723	0.0151013	0.00362607	0.0144917	0.0237148	0.0045255	0.00406006	0.0021052	0.00880984	0.0130936	-0.0135083	0.0130914	0.0159503	0.00483607	0.0124226	0.00803239	0.00587323	0.0107024	0.00167143		666.768	0.20728
		667.159	0.0118862	0.0164749	0.0123256	0.0122643	0.0109165	0.0113426	0.0148534	-0.01234	0.0164483	0.00617478	0.0142198	0.0102614	0.0108855	0.0108739	0.00855588	0.00634215	0.00895244	0.00854664	0.00636361	0.00374512	0.0107282	0.00124156	0.00612328	0.00261336	0.0103976	0.0019927	0.0106658	0.0107147	0.00491956	0.0209374	0.0219698	0.00524195	0.0122787	0.00215091	0.000383532	0.00579772	0.00860213	0.0103063	0.0102198	0.00830986	0.00752363	0.00883443	0.00580934	0.000907266		667.159	0.198243
		667.55	0.00291368	0.00484475	0.00494532	0.0232084	-0.000255778	0.0155376	0.0158044	0.0200114	0.00590969	0.00472827	0.00508131	0.00873466	0.00541571	0.00755599	0.00997869	0.0201139	0.00101912	0.0100643	0.00749928	0.00140277	0.00504823	0.00343971	0.00501188	0.00441808	0.00854897	0.00375777	0.00672863	-0.00324386	0.00361624	0.0247941	-0.000304932	0.00908606	0.00830284	-0.0010111	0.00459161	0.00526335	0.00782168	0.0190655	0.00107697	-0.00242815	0.00873309	0.00723976	0.0066451	0.00103779		667.55	0.221971
		667.941	0.00990138	-0.0027558	0.00988175	-0.000201084	0.000446631	0.00898112	0.0103035	0.000225586	0.0159476	0.0120215	0.00938663	0.00676757	0.0104854	0.00976271	0.0068245	-0.00220487	-0.00602947	0.0146262	0.0010825	0.0101006	0.0113729	0.00864002	0.0078454	0.0134401	0.00570415	0.000156989	0.0112925	1.74546e-05	0.011207	0.0194888	-0.013201	0.0073879	0.00763186	0.00265447	-0.00245615	0.00633151	0.00889093	0.0126338	-0.000612571	0.000246357	0.00717221	0.00613167	0.00650381	0.00101573		667.941	0.20321
		668.332	0.0192361	-0.00180979	0.00995788	0.0255443	0.00465795	0.0126358	0.00849896	0.00979799	0.0115386	0.00513206	0.0132317	0.00521544	0.0067128	0.00432791	0.00643743	-0.00108817	0.00677598	0.00282361	0.00991054	0.0103478	0.00844242	0.00577144	0.00542135	0.00722818	0.00529697	0.00534072	0.0118114	0.011179	-0.000910664	0.0246624	0.0094338	0.00306577	0.00550145	0.00620406	0.00767521	0.00887565	0.0106332	0.0111567	0.00149833	0.000581639	0.0081872	0.00797417	0.00568088	0.000887205		668.332	0.176454
		668.723	0.00728806	0.00319474	0.0100915	0.0204302	0.00879749	0.0118261	0.0134883	0.00520427	0.0106447	0.00861424	0.00504196	0.00616631	0.009592	0.0148657	0.00629626	0.0178142	0.00732371	0.0215636	0.00265171	0.00521312	0.00773301	0.0137843	0.00583829	0.00122105	0.00367058	5.94122e-05	0.00992664	0.00419443	0.000978172	0.00546473	-0.00485693	0.00624304	0.0128703	0.00481298	0.00321349	0.0152167	0.0109166	0.0118632	0.00411736	0.00994253	0.00574586	0.00802595	0.00538594	0.000841143		668.723	0.192449
		669.114	0.009277	0.00598942	0.00287612	0.0323724	0.0100573	0.00733578	0.0123236	0.00820597	0.0136506	0.0113123	0.00943899	0.00887804	0.00543826	0.0157598	0.00791519	-0.00549765	0.0045599	0.0172126	0.00233773	0.00838566	0.00672879	0.0116358	-0.000420474	0.00374694	0.00401442	0.00718106	0.00804767	0.0045116	0.00952623	0.0101868	0.0133933	0.00528913	0.0018324	0.00763457	-0.00117565	0.00896652	0.0138835	0.0114704	0.00244871	0.00770673	0.00835849	0.00811697	0.00594591	0.000928596		669.114	0.207944
		669.505	0.013441	0.00685429	0.00730629	-0.00446401	0.00223081	0.00960814	0.0297878	1.95104e-06	0.00736757	0.0122388	0.0102755	0.0167247	0.0104271	0.00784616	0.0475242	0.0146736	0.00503711	0.000704462	0.000711621	0.000793029	0.0143946	0.0109992	0.00403367	0.0106149	0.00440744	0.00310558	0.00712619	0.0035368	0.00932507	0.0188081	0.00261481	0.0067194	0.00792635	0.00909239	0.0100949	0.00452254	0.00894601	0.00939042	0.0026071	0.0155511	0.00717678	0.00902642	0.00853107	0.00133233		669.505	0.173041
		669.896	0.00952432	-0.000624586	0.0106444	0.0120142	0.009674	0.0110665	0.0143019	0.000914503	-0.000480299	0.00729998	0.00851035	0.00913529	0.00885197	0.00758012	0.0119267	-0.00590748	-0.00468504	0.00774335	0.00208785	0.00308635	-0.00207358	0.0021769	0.0068506	0.00355454	0.00321692	0.00368297	0.0043835	5.10234e-05	0.0138151	0.0104992	0.00922666	0.00978725	0.0118215	0.00635305	0.00438411	0.00351875	0.00456176	0.00969664	0.00286996	-0.00674053	0.00533027	0.00560076	0.00519053	0.000810624		669.896	0.187984
		670.287	0.00574639	0.0136243	-0.00220414	0.00778831	0.00804959	-0.000955176	0.00867498	0.00148734	0.00851508	0.00330667	0.0105587	0.00667195	0.00901366	0.00895128	0.00169731	-0.00847045	-0.00111178	0.00967017	0.0026059	0.00695224	0.00230655	0.00817271	0.00738561	0.00258441	0.00979455	0.00391901	0.00891718	0.00524753	0.0107939	0.0137119	0.0111185	0.00744091	0.0221715	0.0074707	0.00322102	0.0102783	0.00581146	0.0123116	0.00826538	0.006422	0.00551316	0.00666903	0.00506793	0.000791477		670.287	0.176784
		670.679	0.0104409	0.000311196	0.0100858	0.0173348	0.00721858	0.00644981	0.010444	0.00365741	0.0112439	0.00982702	0.0157598	0.00889406	0.00595985	0.0141686	0.0155044	0.0137868	0.00853647	0.00707336	0.00408321	-0.00114949	0.00928815	0.0119154	0.000495115	0.00347823	0.00340976	0.00482763	0.00914989	0.0024193	0.00235103	0.0120943	0.00224958	0.00799549	0.00924234	0.00597692	-0.00420037	0.00569735	0.00434111	0.0145503	0.00585737	0.0135624	0.00363659	0.00751143	0.00491754	0.000767991		670.679	0.170051
		671.07	0.0166961	0.0072894	0.0064817	0.0105768	0.0064805	0.00939323	0.00667585	0.00103771	0.0101201	0.00551395	0.00869244	0.00837375	0.00669369	0.0119148	0.00545343	-0.0123935	-0.00374869	0.00720296	0.00231022	-0.00254889	0.00899803	0.0103754	0.00388923	0.00282221	0.00461656	0.00262307	0.012932	0.00224051	0.00993562	0.0073899	0.0159028	0.00839224	0.00643674	0.00908964	0.000791039	0.00734066	0.00442964	0.00857151	0.00442837	0.0135802	0.00642432	0.006425	0.00518273	0.000809406		671.07	0.180819
		671.461	0.0121305	-0.0111543	0.00745831	0.0223315	0.014429	3.97206e-05	0.00692125	0.000309222	0.00917066	0.012893	0.00455589	0.00967735	0.00483462	0.00460601	0.0179094	0.0161396	0.00537734	0.022811	0.00350324	0.00249697	0.00449124	0.00994457	0.00519339	0.00501639	0.00195477	0.00742292	0.00715462	0.0051518	0.00145058	0.00946147	0.00946903	0.0096451	0.00789821	0.00774026	0.00832323	0.0126248	0.00916757	0.00557263	0.00880602	-0.00176575	0.00494635	0.00746609	0.00606535	0.000947249		671.461	0.169607
		671.852	0.0178121	0.011564	0.00632365	0.0117131	0.00795358	0.0104775	0.0142689	0.00197867	0.0104464	0.00382082	0.0106078	0.00879563	0.0103238	0.00894835	0.00120701	0.0142348	0.0044781	-0.000702304	0.00634933	0.00396535	0.0082493	0.0183004	0.00909931	0.00188396	7.72529e-05	0.00322573	0.00765649	0.000914024	0.0139712	0.00310859	0.00634612	0.00420367	0.00976371	0.00902907	0.00995694	0.00414772	0.00678486	0.0175832	0.00471915	0.0116044	0.00874243	0.00790083	0.00477305	0.000745426		671.852	0.176946
		672.243	0.0107457	0.007976	0.00359364	0.0144007	0.0103857	0.00666722	0.0118454	0.00731292	0.00758353	0.00953123	0.00539315	0.0101925	0.00634918	0.00791886	0.0222215	0.000257392	0.00505337	0.0233524	0.00456151	0.00617801	0.0161226	0.0160441	0.00328804	0.00488137	0.00677765	0.00558734	0.00581947	0.00297954	0.00606133	0.00788649	-0.000252336	0.00736356	0.0169178	0.0045916	-0.00125961	0.00720585	0.0145433	0.00846558	0.00798482	0.0198042	0.00608943	0.0084981	0.00553207	0.000863964		672.243	0.176169
		672.634	0.0182682	0.00452288	0.00392101	0.0276593	-0.00255199	0.00356618	0.00823098	-0.00478051	0.011963	0.00453614	0.00579061	0.0105937	0.00865618	0.00823726	0.0123618	0.0140923	0.00213182	0.010772	0.00436022	0.0104879	0.00296129	0.000355711	0.00206615	0.00898975	0.00204639	0.00169681	0.00593067	0.00600877	0.01448	0.015552	0.0101664	0.00790776	0.0110303	0.00136946	0.0104498	0.00747965	0.0108971	0.0143449	0.00387987	0.00526364	0.00500211	0.00757799	0.00587248	0.000917128		672.634	0.174164
		673.025	0.00473587	0.0110764	0.00968611	0.0176031	0.00817669	0.0148188	0.00957949	0.0116032	0.00624166	0.0136025	0.00942541	0.00875263	0.00789749	0.00947924	0.0123671	0.00603669	0.00864452	0.0153032	0.00357439	0.00266141	0.00306709	-0.0039	0.00632527	0.00687591	0.00573334	0.00206515	0.00311481	0.00970417	0.0112332	0.021876	0.00608745	0.00603333	0.00804649	0.00563399	0.00925878	0.00393535	0.012801	0.0105958	0.00334227	0.0111859	0.00622442	0.00830501	0.0046159	0.000720883		673.025	0.173417
		673.416	0.013618	0.0207659	0.0117218	0.0194414	0.00680922	0.0111753	0.00908947	-0.0123033	0.00282263	0.00850809	0.00458457	0.00530477	0.00715281	0.00908683	0.023038	0.00820286	0.0039063	0.0118	0.00318038	0.00673831	0.00948277	0.0081713	0.00470962	0.00190119	0.00644878	0.00534614	0.00631291	0.00643531	0.00850056	0.0152624	0.00588389	0.00576804	0.00600493	0.0076786	0.00767321	0.00454532	0.00514803	0.00602234	-0.000784843	0.0150739	0.00563897	0.00770407	0.00579972	0.000905764		673.416	0.164913
		673.807	0.00375137	0.00484423	0.00237968	0.0149366	-0.00583427	-0.00940595	0.00612614	0.00854146	0.00616496	-0.00261662	0.0102622	0.00736404	0.00554333	0.00788906	0.0109743	-0.00960775	0.00358108	0.0113314	0.00485645	0.00712385	0.00655173	0.00835573	0.00332875	0.00357821	0.00638435	0.00379918	0.00960391	0.00584442	0.00726584	0.00420601	0.00351105	0.00147369	0.00328797	0.00290175	-0.000945601	-0.0138696	0.00948768	0.0129676	0.00653812	0.0068193	0.00544635	0.0045059	0.00581275	0.000907798		673.807	0.157489
		674.198	0.0121303	0.0128462	0.00190795	0.0260879	0.00809761	-0.00190979	0.00643481	0.00570274	0.016233	0.0102666	0.00490398	0.00508354	0.00617356	0.00196184	0.0140076	0.0258403	-0.000654097	0.0127781	0.0017654	0.00710177	0.00515049	0.00356751	0.00642444	0.0043663	0.00482688	0.00512523	0.00844841	0.00192685	-0.00551257	0.0216495	0.0582617	0.00480173	0.0287039	0.00778485	0.0329473	0.000792003	0.00926657	0.0177535	0.00795498	0.0195663	0.00297496	0.0103302	0.0113414	0.00177123		674.198	0.152429
		674.589	0.0116794	0.00102407	0.00791278	0.0119875	0.00817335	0.0091048	0.00488499	-0.00421154	0.0066241	0.0075454	0.00161585	0.0117757	0.00630136	0.00336183	0.0172038	0.0147555	0.00218169	0.0131394	0.00685279	-0.00549841	0.00772432	0.0174423	-7.37881e-05	0.00815276	-0.00220472	0.000351059	0.00889457	0.00503418	-0.00840433	0.0153658	0.00941528	0.00791081	0.00370906	0.00643737	0.00945839	0.0116088	0.00452313	0.00680947	0.000285399	0.01594	0.0047298	0.00657376	0.00593716	0.000927228		674.589	0.175185
		674.98	0.00881039	-0.00307654	0.00856077	0.0211033	0.00289878	0.0112929	0.00669572	-0.00488191	0.00874229	0.0080197	0.00952098	0.00698255	0.00626734	0.0145829	-0.00814775	0.0143595	0.00616427	0.00324997	0.00484161	0.00639049	0.0065328	-0.00320327	0.0123046	0.00172963	0.000701549	-0.00184735	0.00923316	0.00349524	0.00572284	0.0106053	-0.00519201	0.00647347	0.00289793	0.00649775	0.0068421	0.00118334	0.00623284	0.00351731	0.0030828	-0.00133099	0.00502771	0.00519229	0.00569953	0.000890118		674.98	0.174457
		675.371	0.00383746	-0.000640855	0.0108983	0.011842	0.00784221	0.0136158	0.00671937	-0.000796482	0.00929471	0.00659885	0.00233242	0.00745039	0.00887365	0.00633515	0.00692893	0.0236747	0.000369662	0.00900387	0.00221334	0.00306613	0.00633464	0.0346149	0.00108791	0.00487249	-0.000239828	0.00615263	0.00556612	-0.00144445	-0.00524471	-0.000892448	0.00123737	0.00508571	0.00535982	0.0065141	0.00625654	0.00524154	0.0012248	0.0149197	0.00509737	0.00726017	0.00491144	0.00617989	0.00675236	0.00105454		675.371	0.168914
		675.763	0.0109567	0.0128663	0.00770662	0.0161478	0.0105282	0.00503649	0.0104943	-0.00452809	0.0077082	0.00372352	0.00652229	0.00935545	0.00447803	0.00863053	0.00426283	-0.00267224	0.000783626	0.00910494	0.00699167	0.00213418	0.0119665	0.0112363	-0.000553609	-0.00341729	0.00601366	0.00275867	0.0113802	0.002766	0.00433568	0.00785598	0.00858643	0.00536973	0.00353082	0.004982	0.00865074	0.0108649	0.00850425	0.0152255	0.00698074	0.0077861	0.00671425	0.00662851	0.00459451	0.000717542		675.763	0.137719
		676.154	-0.00130591	0.0134387	0.00395107	0.0112553	0.00608006	0.010296	0.0105899	-0.00112444	0.00585973	0.00576317	0.0082578	0.000431627	0.00485072	0.0121463	0.019375	-0.000653473	-0.00273337	0.00570115	-7.53792e-05	-0.00462294	0.00115135	0.00390048	0.00419329	0.00322571	0.000362191	0.00406858	0.00324743	0.0103687	0.00484144	0.00535935	0.0121305	0.00458423	0.00666593	0.00434359	0.0105936	0.0077552	0.00584548	0.0154388	0.00566039	0.0120689	0.00494301	0.00581047	0.00506264	0.000790651		676.154	0.145213
		676.545	0.0112197	0.0121635	0.00500767	0.0118522	0.00459731	0.0169171	0.00665802	0.00943297	0.0087829	0.00857588	0.00620142	0.00562253	0.0054664	0.0126111	0.0115493	0.00288729	0.003727	-0.00115974	0.00377154	0.000620247	0.010274	0.00503689	0.0139629	-0.000560591	0.00289891	0.00169276	0.00616933	0.00239497	0.0086421	0.00626425	0.00994038	0.00595833	0.00685746	0.00304155	0.015644	0.00786324	0.0126325	0.00599198	0.00288497	0.0107493	0.00611072	0.00709644	0.00426433	0.000665976		676.545	0.149774
		676.936	0.00836801	0.0107715	0.0133439	0.00366461	0.00706013	0.0112547	0.00819798	0.00759971	0.0130713	0.00574741	0.00504459	0.00683483	0.00678835	0.0014434	0.0134212	0.0134433	0.00579967	-0.00297778	0.00515409	0.00986794	0.00994326	0.0193191	0.0011656	0.00411689	0.000398079	0.00363494	0.00899743	0.0053933	0.00968519	0.0101576	-0.000107161	0.00590507	0.00473891	0.00708104	0.00540397	0.00670464	0.0114292	0.0101983	0.00483761	0.0192765	0.00419759	0.00747258	0.0046349	0.00072385		676.936	0.157048
		677.327	0.0017431	-0.00173908	0.00744817	0.0173532	0.0138614	0.0077975	0.00936669	0.0115909	0.00505195	0.00317297	0.00436388	0.0030525	-0.000310319	0.00974765	-0.000872217	-0.00223359	-0.00349326	-0.00238917	0.0036719	0.00500413	0.00365816	0.00973773	0.010397	0.00462848	0.00160887	0.00210102	0.0121888	0.00292396	0.0145261	0.00378499	-0.00177432	0.00495218	0.00812837	0.00253916	0.00934697	0.00694298	0.00240534	0.00984127	0.00385244	-0.000753147	0.00708665	0.00512954	0.00496658	0.00077565		677.327	0.129593
		677.718	0.000445007	0.0108078	0.00582141	0.0122707	0.00681821	0.0124203	0.0061898	-0.0159745	0.0129982	0.0115336	0.0035529	0.00660966	0.00374893	0.00916213	-0.000192407	-0.0145556	-0.00556046	0.0097538	0.00688772	0.012362	0.00297262	0.00637722	0.00428411	0.00486295	0.00335953	0.00294487	0.0110413	0.000858112	0.00151006	0.0120208	-0.00308049	0.00848709	0.0094813	0.00448609	-0.000524516	0.0071471	0.0013959	0.0073209	0.00417585	0.00905551	0.00573265	0.00485386	0.00631664	0.000986494		677.718	0.136904
		678.109	0.0155397	0.00482551	0.00342358	0.0117314	0.00292223	0.00299383	0.0081513	-0.00478167	0.00869385	0.00939668	0.00932949	0.00937624	0.00585488	0.00756192	0.0113585	0.00985958	0.00613472	0.0139503	0.0075422	0.00196745	0.00328493	0.00941005	0.000949781	0.0066699	0.00551857	0.0032942	0.0108908	0.000595588	0.00219152	-0.00229801	0.00557075	0.00654378	0.00794708	0.012616	0.00114219	0.00585981	0.0070936	0.0107237	0.00695011	0.0169803	0.00358989	0.00661844	0.00451618	0.000705309		678.109	0.141189
		678.5	0.0100618	-0.00485052	0.00608541	0.0207231	0.00840671	0.00757896	0.00931682	0.0189594	0.00586677	0.00577087	0.00571054	0.0076508	0.00373411	0.0114373	0.0170166	0.00822197	0.00879039	0.0190589	0.00557992	0.00452876	0.0138658	0.00753974	0.00952481	0.00418965	0.00304267	0.0016751	0.00796067	0.00571227	-0.00177028	0.016928	0.00268642	0.00616004	0.00612107	0.00485303	0.00466803	0.0065442	0.00722065	0.0137035	0.00465841	0.0228425	0.00917908	0.00821839	0.00572318	0.00089381		678.5	0.15191
		678.891	0.0153567	0.00471724	0.00763411	0.00868148	0.00569522	0.0143747	0.0050159	-0.00542887	0.0076603	0.00681115	0.00490404	0.00721592	0.00734113	0.00402622	0.0104256	-0.0292336	0.007194	-0.0238198	-0.00103233	-0.00354979	0.0109544	0.00374192	0.00704961	0.0014147	-0.000214501	0.000326209	0.00395941	0.00599579	-0.000794974	-0.00515166	0.00887525	0.00624036	0.00299134	0.00522174	0.0057128	0.00974623	0.00808964	0.0162544	0.00168639	0.0149633	0.00110211	0.00395497	0.0085473	0.00133486		678.891	0.123957
		679.282	0.0106033	-0.00457758	0.00292779	0.00924257	0.00692398	0.00992478	0.00279616	0.00228924	0.0159652	0.00150855	0.0129348	0.00763328	0.00115616	0.00721122	-0.00614034	0.0122689	0.00686936	0.0086497	-0.000602061	0.00156603	0.00211184	-0.00505466	0.00378299	0.00152269	0.00445149	0.00352371	0.00489294	0.00220555	-0.00581267	0.0151337	0.00971809	0.0074641	-0.00366575	0.00654539	0.00192747	0.0123825	0.00751531	0.0125663	-0.00122459	0.00208813	0.0066631	0.00482655	0.00558637	0.000872444		679.282	0.137121
		679.673	0.0102805	-0.0186751	0.00978306	0.0227849	0.00810429	0.00568201	0.0082929	0.0575576	0.0105744	0.00634588	0.00732304	-0.0001872	0.00524867	0.00744649	0.0050228	0.0461986	-0.00162765	0.00407834	0.00541314	0.00426126	0.00461197	0.00423609	-0.00364442	0.0052302	0.0126219	0.00470317	0.00840086	0.00101765	0.0172358	0.00183062	0.0134375	0.00718418	-0.000331159	0.00840261	0.000585981	0.00666115	0.00769868	0.0119494	0.00189822	-0.000864196	0.00479255	0.00784309	0.0118447	0.00184983		679.673	0.14158
		680.064	0.00602492	-0.00275992	0.00249332	0.0208383	0.00535524	0.00686596	0.00622415	0.0167874	0.0114452	0.00740311	0.0116554	0.00766557	0.00500683	0.00315091	-0.00435017	0.0151938	0.0038391	0.010342	0.00870714	0.00259697	-0.00465962	0.00778624	0.00266373	0.00533714	0.00413011	0.00482373	0.00498577	0.00730048	0.0172977	0.00543535	0.0107009	0.00653598	0.00751541	0.00757988	0.0090739	0.00868987	0.00724971	0.0140489	0.00667853	-0.00155051	0.0044761	0.00684352	0.00527565	0.000823918		680.064	0.131363
		680.456	0.00220018	0.0187358	0.00576205	0.0330418	0.00617124	0.00393702	0.00837576	-0.00668619	0.0138346	0.00264259	0.00931376	0.00768528	0.00887245	0.00822457	0.0149783	0.000358189	0.00791979	0.0259861	-0.00347838	0.00772513	0.0056519	0.0162522	0.000911372	0.00570593	0.00252077	0.00505876	0.00730066	0.00610057	0.0113482	0.0044223	0.0051497	0.00338389	-0.00310327	0.00757602	0.00762242	0.00948799	0.00847125	0.00888253	0.00360869	0.00283482	0.00414952	0.00729113	0.00704831	0.00110076		680.456	0.139262
		680.847	0.0145871	-0.00855766	-0.00536987	0.0126067	-0.00814395	-0.0187052	0.0113016	0.013698	0.0110368	-0.00509405	0.00917404	0.00910626	0.00378857	0.0143545	-0.00290118	0.0259556	0.00719585	0.0162853	0.00316239	0.00236243	0.00356441	0.00167157	0.00246126	-0.000625667	0.0056781	0.00303443	0.00685403	0.000167863	0.00489479	0.0186269	0.0069688	-0.000432434	0.0110423	0.0044837	0.00686654	-0.0102363	0.00408509	0.00798955	0.0040362	0.0042258	0.00385096	0.00475734	0.0082357	0.0012862		680.847	0.12255
		681.238	0.00550374	-0.00294602	-0.00510053	0.0327658	-0.00230786	0.00686502	0.00508195	-0.00269001	0.0109959	0.00343169	0.0109204	0.00892209	0.00298232	0.0112071	0.00129877	0.00862296	0.00489445	0.00867837	0.00244169	0.0047001	0.0118985	0.00747452	0.0132006	0.00539058	0.00526508	0.00525188	0.00797636	0.00913321	0.0127698	0.00737593	0.00991456	0.0041533	0.00238562	0.0114135	0.00601117	0.00396738	0.00613979	0.00883781	0.00279774	-0.00120451	0.00335183	0.00633592	0.00606444	0.000947107		681.238	0.12082
		681.629	0.00604181	-0.00851728	0.000309492	0.00558395	0.00281056	0.002289	0.009045	0.00673948	0.00804568	0.00744529	-0.0017985	0.0106439	0.0059963	0.0106566	-0.00543155	0.007907	0.00207293	0.0148544	-0.000808224	0.00680832	0.0105777	0.0190898	0.0050561	0.00411565	0.00575948	0.00204324	0.0034708	0.00046166	-0.00163677	0.00718625	0.00413414	0.00482358	0.0068071	0.0056414	0.00469581	0.00404972	0.00714947	0.00175173	0.000182667	0.0163216	0.004669	0.00504986	0.00519724	0.000811672		681.629	0.122454
		682.02	-0.0024713	0.000923938	0.00858758	0.0240734	0.00435915	0.00613076	0.00669775	-0.00383046	0.0101578	0.00549953	0.00302357	0.00769199	0.000104841	0.0113568	0.0194659	0.0268573	0.00309961	0.00753757	0.00440964	0.0141442	0.000735862	0.00584262	0.00435903	0.00432014	0.00464506	0.00263208	0.00858343	0.00386153	0.0063021	0.0100988	0.0517421	0.00659435	0.0174647	0.00169659	0.0308458	0.0100153	0.00910618	0.0101342	0.004378	0.00270628	0.00607326	0.00877944	0.00986933	0.00154133		682.02	0.127145
		682.411	0.0103586	0.00648575	0.00555116	0.00725401	0.0139132	0.0119132	0.0100721	-0.00994572	0.014112	0.003356	0.00263056	0.00781636	0.00306933	0.00631198	0.00682738	-0.0020615	0.0097701	0.00964706	0.0036216	0.0028152	0.00928011	0.0193173	0.00455265	0.00281907	0.00601188	0.00210493	0.00243509	0.00215645	-0.00123431	0.0118654	-3.91951e-05	0.00502061	0.0132799	0.0036554	0.00952893	-0.000275563	0.00477104	0.00438861	0.00488474	0.0202128	0.00281851	0.00612373	0.0056068	0.000875635		682.411	0.117224
		682.802	0.0111096	0.00952609	0.00444203	0.00599738	0.0101173	-0.00214188	0.00860208	0.0228878	0.00538709	0.00289984	0.00256795	0.00804235	0.00508641	0.0084366	-0.00226252	0.0186446	0.00264878	0.000262167	0.00167368	0.00457878	0.00315757	-0.000853934	0.0028385	0.00571071	0.00103338	0.00387865	0.00893568	0.00142398	0.00414282	0.00873238	0.0050617	0.00532168	0.00750701	0.00751503	0.0119151	0.00411319	0.00281128	0.00715302	0.0019847	0.00969794	0.00235277	0.00568144	0.00486801	0.000760255		682.802	0.117718
		683.193	0.00237273	9.32196e-05	0.00919081	0.0153551	0.0110324	-0.00145495	0.01003	0.00175812	0.0268403	0.00289114	0.00521226	0.00620862	0.00451426	0.0155179	-0.000980853	0.0158769	0.00285425	-0.00746698	0.00460619	-0.00147287	0.00443034	0.00323924	0.00119173	0.00323954	0.00383073	0.0036771	0.0075116	0.0034126	0.0105665	0.00324974	-0.000305152	0.00856001	0.0194514	0.00758215	0.00264549	0.0170734	0.00441072	0.00683382	0.00809237	0.0151621	0.00804132	0.00646037	0.0065007	0.00101524		683.193	0.103442
		683.584	0.0117692	-0.000355008	0.00187148	0.00759249	0.00644965	0.00587417	0.00807857	0.0111351	0.00626505	0.00737734	0.00619632	0.00454477	0.00538753	0.01024	-0.000807437	-0.0136481	-0.00353502	-0.00504906	0.00460968	0.00032669	0.00548694	0.00862919	0.00475732	0.00784032	0.00109722	0.00475197	0.00322987	0.00717897	0.010781	0.00896539	-0.00167438	0.0091692	0.00970086	0.00375859	0.00296085	0.0066266	0.00916554	0.0131522	0.00453022	0.012688	0.00412892	0.00515239	0.00514179	0.000803012		683.584	0.102313
		683.975	-0.00505216	-0.000856512	0.00607753	0.0131375	0.00651086	0.00216652	0.0130865	0.00316627	0.0109196	0.00225982	0.0109547	0.00750571	0.00394335	0.00129215	0.00115625	0.00563025	0.00251707	-0.000129796	0.00505094	0.0110154	0.00639254	0.0060945	0.000718121	-0.00228639	0.000267487	0.00510268	0.00142277	0.00499717	0.0088939	0.0010074	-0.00130343	0.00618363	0.009397	0.00442859	0.009107	0.004506	0.00781807	0.00434381	0.00584269	0.000526421	0.00509613	0.00460752	0.00415066	0.000648224		683.975	0.105369
		684.366	0.0119242	0.00165255	0.000217374	0.0192989	0.0030851	0.00590002	0.00673007	0.00872916	0.000786975	0.0023551	0.00243276	0.00363226	0.0030791	0.00544673	0.0141783	0.000487282	0.00337112	0.0119066	0.00733229	0.0083801	0.00789217	0.00499662	-0.0021726	0.00582168	0.00190884	0.00112868	0.0112366	0.00178843	0.00385211	0.0133592	0.00285689	0.00754442	0.00117189	0.00633584	0.00715271	0.00645369	0.00966586	0.0121741	0.00587633	0.0044618	0.00351225	0.0058035	0.00443517	0.000692658		684.366	0.113429
		684.757	0.00589834	-0.00373196	0.00219249	-0.000182174	0.00861266	0.00339094	0.00466439	0.00660101	0.00716275	0.00906258	0.00545379	0.00344288	0.00382873	0.00750906	0.0137953	0.00552079	0.00480225	0.00904382	0.00457929	0.00445552	0.00531428	0.00914346	-0.00204738	0.00235611	0.00169488	0.00268753	-0.0025713	0.00719035	0.0086975	0.0113996	0.00791107	0.00543934	0.0076166	0.00236923	-0.00218789	0.00946719	0.0104275	0.00573205	0.00265236	0.00736987	0.00434853	0.00514911	0.00381817	0.000596297		684.757	0.0998804
		685.148	0.00301462	0.01256	0.00357227	-8.36404e-06	0.00353965	0.00954189	0.00849692	-0.00389729	0.00664639	0.00388211	0.00596021	0.0087451	0.00256251	0.0159425	0.00359034	0.00599891	0.00510223	0.00779337	0.00359438	0.00793226	0.0140321	0.0127161	0.00449402	0.00915717	0.00145208	0.00362282	-0.00195271	0.00510526	0.00645915	0.0111627	0.0104917	0.00595134	0.000120945	0.0059084	0.000418221	0.00713905	0.0107059	0.00745448	-0.000861349	0.0220582	0.00549144	0.00623652	0.00496982	0.000776156		685.148	0.109042
		685.54	0.00558804	0.00682297	0.00709644	0.0247446	0.00858929	0.0128093	0.0141094	0.00158913	0.00471819	8.58403e-05	0.00608303	0.00263862	0.00305668	0.00635995	0.00829508	0.000863642	0.00297396	0.0144865	0.000570642	0.00012039	0.00687666	0.00780032	0.00221409	0.000512672	0.00340549	-0.000658656	0.00339815	0.00291633	0.00306979	-0.00399091	0.00957456	0.00555675	0.000176524	0.00126364	-0.000316381	0.0106509	0.00652794	0.0100932	-0.00224265	0.00682868	0.00630281	0.00516004	0.00526649	0.000822487		685.54	0.108537
		Hv1-F150A-A197Anap	Anap fluorescence
		Wavelenght (nm)	Cell_1	Cell_2	Cell_3	Cell_4	Cell_5	Cell_6	Cell_7	Cell_8	Cell_9	Cell_10	Cell_11	Cell_12	Cell_13	Cell_14	Cell_15	Cell_16	Cell_17	Cell_18	Cell_19	Cell_20	Cell_21	Cell_22	Cell_23	Cell_24	Cell_25	Cell_26	Cell_27	Cell_28	Cell_29	Cell_30	Cell_31	Cell_32	Cell_33	Cell_34	Cell_35	Cell_36	Cell_37	Cell_38	Cell_39	Cell_40	Cell_41	Cell_42	Cell_43	Cell_44	Cell_45	Cell_46	Cell_47
		428.6	0.00812786	0.00382926	-0.00246068	0.00031795	0.00465203	-0.010624	0.00402478	0.00175521	-0.0024754	0.0082793	0.000993467	0.00421696	0.00438055	0.00356532	0.00155524	0.00760468	0.00678145	0.00129533	0.00317431	0.000235318	-0.00247817	-0.0125352	0.00147335	-0.0115054	0.001671	0.00184103	0.00511696	0.00358194	-0.00144497	0.000239063	0.00697782	-0.00103578	-0.00193842	0.0026475	0.00464102	-0.000477	0.000275195	0.0116988	-0.00160024	-5.66475e-05	0.0029929	0.0472364	0.00320097	0.00278839	0.00246198	-0.00240446	0.00704888
		428.991	0.114913	0.221434	0.325407	0.279612	0.167313	0.417993	0.0944123	0.164866	0.190994	0.171964	0.184005	0.0977005	0.134666	0.136485	0.0766771	0.224069	0.109544	0.0694206	0.0593732	0.101995	0.198596	0.19454	0.0688693	0.063791	0.125618	0.123994	0.0982111	0.11092	0.173564	0.07516	0.15099	0.10753	0.175639	0.313195	0.165145	0.227965	0.0958547	0.158179	0.259639	0.136754	0.149913	0.339182	0.0918441	0.216267	0.0650863	0.0922853	0.148165
		429.382	0.121119	0.241098	0.352629	0.334078	0.184379	0.450372	0.133183	0.159923	0.200604	0.202764	0.204083	0.149443	0.166218	0.164024	0.0841273	0.263013	0.119546	0.0919088	0.0699317	0.121174	0.224945	0.206802	0.0862876	0.069141	0.160024	0.130391	0.103539	0.130782	0.212778	0.105949	0.202404	0.115963	0.219772	0.351524	0.194259	0.275664	0.102781	0.184745	0.309209	0.151232	0.175349	0.370154	0.130532	0.265094	0.0985228	0.113029	0.180063
		429.773	0.116586	0.263292	0.327121	0.339206	0.182508	0.464667	0.142487	0.183718	0.206194	0.190736	0.184671	0.15824	0.156553	0.178188	0.111901	0.249546	0.116339	0.0866848	0.085556	0.153143	0.244204	0.216799	0.0913803	0.072997	0.152444	0.151629	0.109085	0.136455	0.200057	0.0841835	0.23956	0.117351	0.211695	0.337587	0.196123	0.277097	0.13969	0.149781	0.299679	0.149631	0.198636	0.412408	0.141418	0.270919	0.10016	0.116498	0.183279
		430.164	0.123056	0.278633	0.35223	0.373715	0.195276	0.436638	0.132326	0.231118	0.197381	0.233743	0.204336	0.161944	0.164201	0.183249	0.0963349	0.275678	0.170273	0.080116	0.0830793	0.143891	0.266358	0.238689	0.096186	0.0744662	0.148816	0.165299	0.113279	0.131591	0.213054	0.0843494	0.255139	0.129396	0.227058	0.36185	0.216513	0.298798	0.126249	0.142043	0.335108	0.165202	0.226789	0.432719	0.138169	0.294104	0.117725	0.111848	0.205374
		430.555	0.11739	0.27798	0.3389	0.364615	0.199428	0.548578	0.137548	0.180407	0.222343	0.217505	0.199174	0.147161	0.166127	0.188446	0.10483	0.225984	0.146479	0.0704799	0.0899078	0.174587	0.284422	0.239011	0.0943992	0.0834031	0.167589	0.146917	0.113756	0.123196	0.221043	0.108714	0.287664	0.144632	0.232792	0.345713	0.219483	0.279828	0.124845	0.16876	0.328393	0.165321	0.21438	0.462278	0.137271	0.274904	0.117747	0.103189	0.195907
		430.946	0.128609	0.263175	0.384649	0.374572	0.209881	0.565612	0.159606	0.233328	0.226597	0.18442	0.209311	0.158152	0.161958	0.184908	0.0919271	0.270164	0.145675	0.0971726	0.0544056	0.170637	0.292792	0.245252	0.0915867	0.101856	0.17295	0.185723	0.107735	0.135978	0.245274	0.118249	0.254737	0.134959	0.234636	0.342207	0.219024	0.286866	0.120744	0.168364	0.343816	0.183858	0.208174	0.404404	0.139336	0.304064	0.10887	0.093787	0.239165
		431.338	0.139978	0.297239	0.387775	0.411457	0.223383	0.576508	0.147027	0.181901	0.237399	0.185273	0.227827	0.166176	0.167172	0.200987	0.0942725	0.272062	0.143524	0.0900901	0.0855263	0.132883	0.273345	0.273267	0.103459	0.0920133	0.190982	0.196137	0.129966	0.144025	0.232261	0.0988767	0.287255	0.129508	0.242367	0.396911	0.20061	0.300501	0.117454	0.215491	0.36752	0.186822	0.189551	0.375197	0.12801	0.285665	0.106992	0.102015	0.199446
		431.729	0.124527	0.317902	0.384241	0.361609	0.218021	0.590727	0.15931	0.233364	0.238172	0.206378	0.22891	0.183441	0.176467	0.194103	0.118523	0.318375	0.182052	0.117962	0.101332	0.19749	0.281581	0.26075	0.0942293	0.12566	0.179841	0.193196	0.116684	0.152706	0.23993	0.112907	0.275805	0.15689	0.270634	0.419858	0.229737	0.332072	0.141925	0.159908	0.376877	0.175003	0.228169	0.400917	0.153768	0.346398	0.126669	0.115945	0.215774
		432.12	0.140352	0.299822	0.412528	0.420068	0.220547	0.544767	0.152263	0.213209	0.241441	0.217645	0.22116	0.192122	0.178143	0.22643	0.109041	0.287292	0.184502	0.0885747	0.0713275	0.167234	0.280297	0.263468	0.0916554	0.101915	0.176791	0.169024	0.126637	0.138307	0.255942	0.120763	0.282305	0.153868	0.25654	0.402842	0.236399	0.284961	0.145981	0.223055	0.378897	0.180735	0.265062	0.431086	0.149091	0.325329	0.1188	0.133802	0.199381
		432.511	0.158846	0.319872	0.436339	0.400169	0.21213	0.577294	0.167671	0.241193	0.24813	0.233417	0.241792	0.180345	0.181123	0.228243	0.116929	0.301189	0.187309	0.106376	0.0673857	0.190112	0.288469	0.273965	0.114426	0.100723	0.180062	0.154034	0.139023	0.160702	0.250205	0.11203	0.289985	0.156486	0.259061	0.427998	0.229358	0.362692	0.14828	0.193719	0.320398	0.198635	0.269182	0.410504	0.1546	0.356821	0.129297	0.112477	0.219041
		432.902	0.132123	0.312162	0.421034	0.422979	0.250724	0.625215	0.193822	0.232734	0.259913	0.264627	0.256615	0.205398	0.18619	0.304636	0.130234	0.341803	0.202079	0.106169	0.0846715	0.221185	0.308647	0.28372	0.104153	0.0875463	0.181131	0.188894	0.155103	0.171085	0.267137	0.111711	0.318965	0.168084	0.261821	0.427232	0.241622	0.3537	0.148422	0.136635	0.350589	0.193516	0.226371	0.396178	0.152092	0.292206	0.136299	0.147821	0.225595
		433.293	0.13542	0.350016	0.408747	0.472872	0.238854	0.647936	0.184649	0.235226	0.261417	0.244793	0.24714	0.189795	0.196147	0.220241	0.138794	0.347232	0.190199	0.0920002	0.100078	0.187914	0.307582	0.286769	0.119083	0.0922715	0.194786	0.209489	0.136393	0.160551	0.263507	0.122994	0.273987	0.160737	0.285432	0.433317	0.24656	0.333372	0.169513	0.202006	0.354091	0.212583	0.269832	0.495224	0.152894	0.329164	0.155186	0.156446	0.206662
		433.684	0.152973	0.370387	0.434516	0.443921	0.256169	0.658695	0.174184	0.246004	0.273981	0.25377	0.241681	0.216344	0.192794	0.227223	0.142994	0.342131	0.195448	0.103195	0.0901432	0.195803	0.324274	0.301341	0.134134	0.0968552	0.20124	0.217561	0.135996	0.175369	0.273584	0.123388	0.335537	0.165557	0.286853	0.423315	0.246827	0.376207	0.158593	0.233097	0.406884	0.209836	0.303704	0.5284	0.16586	0.374824	0.151388	0.140209	0.246274
		434.075	0.15112	0.341888	0.442211	0.431619	0.238036	0.661857	0.186342	0.242515	0.260842	0.249141	0.274646	0.207406	0.200496	0.248485	0.14807	0.300799	0.190504	0.101017	0.0911493	0.171839	0.314565	0.300078	0.125985	0.115313	0.200852	0.195365	0.149345	0.164623	0.27756	0.115263	0.314147	0.164526	0.315797	0.469578	0.263178	0.384352	0.148403	0.182556	0.4515	0.219148	0.277016	0.471949	0.152016	0.376831	0.134285	0.135373	0.224643
		434.466	0.153147	0.329784	0.456279	0.454409	0.26348	0.71281	0.177799	0.256597	0.259427	0.266705	0.268275	0.206577	0.212407	0.261449	0.135323	0.348649	0.208454	0.112019	0.114534	0.185748	0.347225	0.321926	0.124729	0.129785	0.219262	0.226739	0.159801	0.170087	0.291636	0.144555	0.338389	0.165899	0.295005	0.474434	0.268501	0.339327	0.163384	0.187156	0.425866	0.235098	0.25886	0.537881	0.178244	0.370167	0.148117	0.162008	0.251737
		434.857	0.155542	0.355246	0.458877	0.464739	0.251201	0.723515	0.195278	0.246159	0.290513	0.310612	0.268761	0.206509	0.205204	0.246954	0.133306	0.43225	0.211412	0.122082	0.114271	0.192067	0.341995	0.305592	0.122592	0.129947	0.219863	0.209018	0.161693	0.178767	0.283753	0.124175	0.36128	0.185886	0.323448	0.428263	0.280837	0.345935	0.152324	0.223424	0.43943	0.205635	0.283869	0.491685	0.180152	0.35676	0.1617	0.153399	0.268157
		435.248	0.133358	0.371569	0.427726	0.470875	0.28157	0.707669	0.200765	0.28145	0.289957	0.273942	0.282515	0.224638	0.21457	0.253948	0.121218	0.381534	0.217093	0.11327	0.110894	0.224089	0.344481	0.347489	0.128223	0.126805	0.214816	0.208579	0.168719	0.172703	0.289145	0.145579	0.368569	0.181363	0.334044	0.517676	0.283944	0.371575	0.167129	0.244445	0.45517	0.239523	0.307792	0.503734	0.165292	0.37604	0.160562	0.159563	0.273032
		435.639	0.164999	0.355211	0.479043	0.467026	0.293741	0.708673	0.210286	0.291873	0.280705	0.317354	0.301578	0.239688	0.215661	0.25707	0.148127	0.370154	0.213201	0.128289	0.117103	0.209217	0.323703	0.358743	0.126404	0.117868	0.234191	0.261752	0.177101	0.201898	0.290692	0.12975	0.387776	0.172452	0.315465	0.488149	0.282356	0.405687	0.179084	0.291902	0.457011	0.229662	0.272501	0.478648	0.175036	0.390193	0.155658	0.17184	0.309034
		436.031	0.135824	0.385014	0.505856	0.497583	0.29594	0.7269	0.213741	0.269388	0.291532	0.316917	0.294917	0.240278	0.24243	0.25977	0.155819	0.417651	0.221188	0.121558	0.110425	0.24425	0.339976	0.359153	0.14733	0.123166	0.240522	0.230557	0.165903	0.186279	0.286928	0.125405	0.375045	0.207808	0.324058	0.486231	0.278659	0.381775	0.172413	0.270964	0.433105	0.222226	0.290067	0.567642	0.188051	0.430069	0.163742	0.155781	0.275494
		436.422	0.179757	0.387383	0.485396	0.493872	0.292162	0.75924	0.214973	0.277833	0.294755	0.303893	0.289942	0.238987	0.243833	0.282891	0.177129	0.457985	0.260775	0.146127	0.149159	0.234268	0.31822	0.36288	0.140901	0.138513	0.230642	0.246307	0.189819	0.199025	0.324991	0.151881	0.41219	0.185088	0.324052	0.511997	0.312579	0.370357	0.199286	0.258128	0.44604	0.21654	0.299889	0.458086	0.202259	0.401506	0.181602	0.186059	0.310305
		436.813	0.193906	0.405352	0.488043	0.513398	0.282843	0.76344	0.219616	0.320326	0.286788	0.302492	0.314808	0.264706	0.240304	0.277779	0.166119	0.421104	0.251939	0.126835	0.14264	0.210488	0.360674	0.334106	0.145181	0.124472	0.245114	0.260924	0.168585	0.211453	0.318502	0.145633	0.394589	0.182497	0.33409	0.518852	0.288928	0.415888	0.181973	0.255588	0.460557	0.232	0.312607	0.607477	0.179817	0.439212	0.165776	0.197107	0.295979
		437.204	0.15129	0.416774	0.513564	0.546477	0.314849	0.769869	0.220416	0.307562	0.29967	0.304011	0.322183	0.262555	0.250837	0.27966	0.197777	0.413831	0.232461	0.133489	0.117059	0.266546	0.382569	0.349924	0.133789	0.11837	0.249672	0.233515	0.213698	0.234078	0.301486	0.151725	0.383939	0.190846	0.328137	0.532501	0.301172	0.390923	0.190083	0.282254	0.527285	0.238494	0.319696	0.561297	0.195155	0.445907	0.16794	0.176399	0.279465
		437.595	0.159784	0.426917	0.530825	0.479961	0.304877	0.741716	0.204775	0.30754	0.322414	0.354193	0.324946	0.276691	0.257073	0.279828	0.165358	0.395449	0.267376	0.126145	0.119137	0.24935	0.414712	0.380415	0.144946	0.14985	0.250484	0.254808	0.19457	0.230609	0.345282	0.169378	0.388379	0.196765	0.344114	0.551773	0.315409	0.420994	0.205508	0.298433	0.504396	0.235997	0.351501	0.509233	0.209221	0.45938	0.184544	0.172654	0.294285
		437.986	0.180806	0.399166	0.534119	0.557978	0.300675	0.790959	0.237709	0.33184	0.335534	0.343992	0.347166	0.259853	0.253361	0.27998	0.160213	0.479388	0.271252	0.142052	0.101145	0.26588	0.394809	0.402439	0.150508	0.132544	0.249938	0.24731	0.18633	0.225914	0.329776	0.163814	0.457665	0.202793	0.345322	0.553602	0.336981	0.435815	0.208324	0.266431	0.51728	0.251463	0.349554	0.554775	0.174775	0.433248	0.183881	0.168744	0.327801
		438.377	0.199286	0.419222	0.511552	0.562683	0.3305	0.821335	0.232679	0.33666	0.329911	0.34701	0.345188	0.293256	0.280709	0.295624	0.160164	0.456488	0.26911	0.152755	0.137322	0.247377	0.397906	0.387228	0.134324	0.143704	0.258856	0.286531	0.209576	0.245537	0.352584	0.159047	0.417541	0.197656	0.347528	0.571176	0.327421	0.469748	0.186867	0.290751	0.557447	0.274544	0.319812	0.562647	0.222109	0.495708	0.191803	0.176834	0.296646
		438.768	0.175616	0.405308	0.559503	0.529854	0.310005	0.80843	0.252953	0.346161	0.296844	0.370344	0.351236	0.2733	0.27821	0.292856	0.152011	0.452132	0.262539	0.148589	0.112368	0.248256	0.393386	0.352515	0.154148	0.143127	0.278873	0.271328	0.228161	0.217266	0.356982	0.157041	0.471903	0.188759	0.355601	0.585983	0.317116	0.485656	0.212717	0.298387	0.510962	0.260581	0.363947	0.596321	0.217088	0.447388	0.185247	0.19466	0.313359
		439.159	0.173557	0.447272	0.564537	0.560045	0.326758	0.852038	0.251716	0.318059	0.328133	0.337821	0.357202	0.278316	0.273956	0.312643	0.179249	0.545491	0.271526	0.15832	0.136323	0.242296	0.433516	0.382313	0.146163	0.137268	0.281623	0.240752	0.220575	0.256402	0.353237	0.166066	0.437573	0.213781	0.371747	0.561684	0.332356	0.471915	0.213722	0.272792	0.475331	0.27199	0.386591	0.608899	0.193473	0.488453	0.172326	0.190761	0.38458
		439.55	0.172939	0.452462	0.587203	0.601482	0.342877	0.852991	0.243957	0.345084	0.318367	0.355215	0.370498	0.276126	0.300008	0.303109	0.18435	0.521238	0.282566	0.165506	0.147165	0.249752	0.427844	0.408567	0.164907	0.10584	0.273326	0.308311	0.205163	0.230087	0.351107	0.153827	0.452284	0.222839	0.371338	0.573537	0.340854	0.450296	0.219384	0.31078	0.521157	0.265324	0.339553	0.588269	0.208401	0.486168	0.1928	0.194613	0.355984
		439.941	0.199988	0.4549	0.594008	0.588848	0.345268	0.829246	0.277161	0.356815	0.33959	0.359101	0.396776	0.303374	0.273401	0.306212	0.188964	0.423605	0.29735	0.165003	0.127065	0.270475	0.447279	0.390049	0.149305	0.136896	0.306028	0.266987	0.20573	0.233274	0.351475	0.183617	0.428898	0.233032	0.372212	0.583505	0.350753	0.449515	0.22858	0.31062	0.602061	0.261457	0.372036	0.636905	0.22056	0.553167	0.203254	0.208569	0.367913
		440.332	0.208013	0.508171	0.607725	0.634928	0.332573	0.857931	0.260131	0.356074	0.321211	0.416005	0.357611	0.309468	0.289857	0.35187	0.168823	0.463832	0.294236	0.173192	0.161162	0.302448	0.468887	0.383942	0.170396	0.142497	0.287767	0.26174	0.223939	0.243821	0.357501	0.173192	0.481632	0.237115	0.382093	0.609221	0.332273	0.507189	0.239	0.222629	0.558841	0.283482	0.359981	0.664197	0.233376	0.536157	0.174313	0.191622	0.368156
		440.723	0.1574	0.498769	0.590297	0.603391	0.346327	0.895054	0.27238	0.356869	0.366526	0.341535	0.396056	0.304409	0.262273	0.305024	0.158183	0.486422	0.284254	0.158544	0.169676	0.31224	0.461487	0.402758	0.163317	0.116729	0.324699	0.315694	0.224673	0.277794	0.389725	0.177738	0.434637	0.232628	0.428784	0.598805	0.363099	0.478077	0.247025	0.293728	0.613841	0.261424	0.385861	0.58871	0.247452	0.499254	0.20398	0.198076	0.372878
		441.115	0.177914	0.455931	0.610289	0.611661	0.371537	0.968236	0.268854	0.358431	0.362994	0.369867	0.391752	0.287972	0.280482	0.317797	0.171296	0.489836	0.316243	0.15391	0.1248	0.311022	0.397495	0.44842	0.179625	0.137527	0.315626	0.305664	0.229426	0.269413	0.381887	0.1627	0.464896	0.240726	0.398438	0.63635	0.383059	0.521091	0.234478	0.333255	0.583642	0.276865	0.38389	0.670418	0.233396	0.527545	0.219735	0.212423	0.382524
		441.506	0.212369	0.489013	0.630386	0.666093	0.377397	0.96936	0.272744	0.391513	0.360991	0.383223	0.374147	0.316076	0.30779	0.332352	0.175367	0.486045	0.315918	0.177825	0.151725	0.304284	0.46845	0.453078	0.187129	0.122158	0.319679	0.293181	0.231949	0.233313	0.387917	0.197788	0.505439	0.244194	0.409793	0.66418	0.382718	0.448002	0.230042	0.333237	0.587261	0.313474	0.414081	0.660715	0.256294	0.512735	0.223913	0.235119	0.377883
		441.897	0.226054	0.483995	0.630924	0.631185	0.379535	1.03268	0.303194	0.369879	0.377858	0.371816	0.390834	0.313801	0.308405	0.347181	0.203504	0.559838	0.31706	0.186335	0.133805	0.300517	0.461994	0.469038	0.181422	0.138171	0.343266	0.306513	0.255484	0.254989	0.397586	0.172148	0.470611	0.25182	0.406525	0.641732	0.402106	0.483548	0.25576	0.327913	0.651157	0.296175	0.39514	0.707982	0.244719	0.542812	0.21202	0.205986	0.385651
		442.288	0.236276	0.501758	0.667253	0.643276	0.369374	1.00393	0.282072	0.384651	0.37408	0.406826	0.420193	0.344241	0.30974	0.352097	0.201403	0.593597	0.303498	0.170051	0.143739	0.292294	0.499779	0.444814	0.167352	0.147645	0.332594	0.298184	0.224708	0.24329	0.400543	0.17138	0.502757	0.237763	0.447132	0.661172	0.402924	0.556128	0.240922	0.304035	0.636791	0.286544	0.412971	0.634631	0.227449	0.572514	0.219501	0.237227	0.358566
		442.679	0.208863	0.525676	0.666827	0.655525	0.389997	1.03167	0.288078	0.420551	0.415848	0.476576	0.415904	0.346625	0.320488	0.358639	0.222884	0.56517	0.354637	0.182145	0.135654	0.318783	0.484416	0.430726	0.160851	0.147814	0.33334	0.306911	0.26717	0.270448	0.418063	0.187552	0.514195	0.240143	0.425139	0.655843	0.406965	0.559907	0.248976	0.371266	0.628614	0.306066	0.416505	0.757546	0.243845	0.559789	0.232567	0.249929	0.414212
		443.07	0.223883	0.520028	0.652285	0.637779	0.413048	1.03732	0.297831	0.404686	0.387644	0.394618	0.424363	0.333272	0.322362	0.34617	0.216909	0.490316	0.309927	0.198862	0.141447	0.329016	0.502141	0.458056	0.178035	0.136097	0.348678	0.273585	0.232858	0.280637	0.427559	0.187988	0.524451	0.239076	0.430515	0.68253	0.378212	0.508071	0.238188	0.336819	0.619821	0.3137	0.42949	0.777818	0.239359	0.535308	0.220205	0.236809	0.412138
		443.461	0.239354	0.552149	0.652235	0.731696	0.405013	1.05546	0.3151	0.401983	0.407199	0.471816	0.419691	0.363849	0.335812	0.343425	0.219664	0.587915	0.331823	0.182536	0.182394	0.342454	0.502759	0.511186	0.17793	0.175926	0.351948	0.3622	0.265387	0.28722	0.424258	0.189075	0.521321	0.239971	0.442501	0.696281	0.411564	0.52494	0.25976	0.305615	0.667537	0.292924	0.456014	0.753346	0.242688	0.5208	0.224625	0.2538	0.442525
		443.852	0.225707	0.554616	0.688762	0.693328	0.422763	1.04954	0.319069	0.382094	0.390026	0.454812	0.421828	0.349545	0.349959	0.372629	0.208949	0.516869	0.354759	0.180918	0.180578	0.322756	0.505651	0.523336	0.186114	0.156011	0.344854	0.328369	0.258334	0.261571	0.440806	0.166062	0.555648	0.268638	0.435354	0.701152	0.4266	0.603812	0.26342	0.348919	0.680836	0.301638	0.430724	0.748145	0.242437	0.611237	0.222014	0.247835	0.407071
		444.243	0.226096	0.52611	0.692508	0.690329	0.417648	1.08964	0.304819	0.416936	0.388309	0.444777	0.452301	0.372132	0.320303	0.366831	0.214674	0.588211	0.335893	0.189584	0.148161	0.337297	0.576043	0.456812	0.190459	0.152869	0.384758	0.305644	0.250281	0.286393	0.407583	0.208325	0.565188	0.274887	0.462854	0.702529	0.425818	0.577526	0.258145	0.311577	0.719903	0.32506	0.456316	0.665517	0.267891	0.606121	0.234205	0.267209	0.428858
		444.634	0.220731	0.553124	0.711758	0.706818	0.434321	1.02782	0.300637	0.405949	0.444005	0.420983	0.463312	0.37679	0.364169	0.409773	0.194731	0.597664	0.345045	0.200539	0.149081	0.346433	0.518361	0.504498	0.192054	0.161857	0.34619	0.308049	0.261486	0.292309	0.431964	0.197355	0.629046	0.267944	0.446993	0.712243	0.430716	0.565851	0.263281	0.343461	0.726291	0.308321	0.448893	0.763529	0.27998	0.603285	0.25281	0.239249	0.46493
		445.025	0.198898	0.547904	0.727046	0.693479	0.419048	1.06457	0.316811	0.436259	0.387803	0.490363	0.495069	0.401128	0.359857	0.368921	0.258144	0.664072	0.352144	0.20936	0.156309	0.346082	0.53032	0.558344	0.213833	0.159049	0.370414	0.318196	0.261645	0.302219	0.444279	0.171595	0.563619	0.29284	0.472485	0.71927	0.422381	0.601212	0.272294	0.361286	0.728967	0.323514	0.43777	0.72333	0.277211	0.607035	0.233369	0.263225	0.451905
		445.416	0.232042	0.567817	0.726133	0.664996	0.453212	1.11072	0.322778	0.491772	0.415945	0.441252	0.506177	0.387455	0.343643	0.408048	0.227833	0.675521	0.348447	0.221142	0.163952	0.357014	0.562768	0.488133	0.199556	0.142523	0.378535	0.329924	0.296094	0.295341	0.445875	0.204331	0.60558	0.234539	0.46954	0.715991	0.447921	0.5784	0.26901	0.364501	0.748587	0.330779	0.45393	0.677367	0.287514	0.638561	0.245287	0.277972	0.477883
		445.808	0.191319	0.556521	0.736566	0.718465	0.408995	1.11184	0.342875	0.440362	0.411717	0.50751	0.47074	0.413436	0.343912	0.411154	0.235824	0.602127	0.392769	0.202778	0.189788	0.37244	0.494493	0.541882	0.211166	0.171238	0.372955	0.354989	0.319888	0.321609	0.456566	0.229057	0.555304	0.277187	0.504619	0.738078	0.436481	0.58829	0.288212	0.339745	0.764706	0.319009	0.455812	0.764845	0.277316	0.617111	0.256243	0.278635	0.471989
		446.199	0.23844	0.550738	0.742543	0.744423	0.462564	1.05811	0.344834	0.446936	0.413776	0.499052	0.511701	0.407	0.374765	0.433444	0.239239	0.678574	0.349088	0.235718	0.177536	0.382301	0.537503	0.533269	0.21196	0.180452	0.370802	0.332599	0.263248	0.317241	0.450389	0.218461	0.582863	0.269832	0.489592	0.718922	0.463462	0.602284	0.27622	0.428222	0.787726	0.347069	0.458267	0.766835	0.292705	0.617778	0.252389	0.271398	0.447988
		446.59	0.230936	0.599592	0.780373	0.744755	0.45257	1.13479	0.345383	0.478691	0.447327	0.529032	0.50501	0.406126	0.371952	0.421294	0.242551	0.598003	0.380883	0.232415	0.164531	0.337968	0.539326	0.508133	0.219284	0.163902	0.38804	0.360288	0.309279	0.346903	0.486981	0.194696	0.600098	0.278191	0.464627	0.743252	0.4477	0.614207	0.268382	0.368774	0.805696	0.358775	0.44268	0.890689	0.309452	0.659433	0.268136	0.2885	0.452009
		446.981	0.229878	0.563891	0.781237	0.71884	0.463212	1.18691	0.350871	0.521045	0.424442	0.547703	0.504669	0.383452	0.373956	0.420561	0.231586	0.646778	0.403162	0.219359	0.189872	0.360337	0.530071	0.566667	0.22545	0.174986	0.413682	0.369217	0.311532	0.366207	0.477595	0.235531	0.578587	0.26329	0.477772	0.790282	0.472169	0.59166	0.292042	0.367245	0.734855	0.342372	0.443012	0.727466	0.271845	0.647146	0.273608	0.296293	0.46737
		447.372	0.235199	0.608481	0.793632	0.778298	0.469218	1.12945	0.35049	0.496554	0.437402	0.543385	0.506345	0.426262	0.370072	0.421539	0.22229	0.65053	0.430395	0.221126	0.186309	0.380727	0.600162	0.58317	0.229147	0.196101	0.407854	0.335794	0.320429	0.341743	0.463895	0.212998	0.598462	0.278405	0.500098	0.759019	0.460299	0.634897	0.27481	0.37966	0.810298	0.322719	0.492506	0.769696	0.302054	0.638741	0.257925	0.302372	0.506299
		447.763	0.268136	0.609394	0.788967	0.77042	0.476122	1.18791	0.370407	0.486203	0.419478	0.525966	0.512021	0.428727	0.36932	0.435571	0.248407	0.668065	0.394428	0.225789	0.191466	0.378198	0.610542	0.502215	0.211032	0.202602	0.420529	0.337658	0.335454	0.347013	0.46648	0.216051	0.613636	0.309873	0.522638	0.764924	0.466709	0.662786	0.293741	0.326509	0.789221	0.371469	0.470378	0.745033	0.308581	0.689695	0.28344	0.29687	0.522498
		448.154	0.248791	0.603675	0.765407	0.793849	0.464431	1.17812	0.371344	0.510074	0.426721	0.535243	0.538166	0.421301	0.389608	0.431675	0.241414	0.670032	0.399217	0.235689	0.20063	0.406834	0.613294	0.581409	0.210577	0.166007	0.423112	0.362411	0.322729	0.326594	0.487067	0.229372	0.644944	0.286288	0.528127	0.782772	0.485344	0.657848	0.298581	0.438535	0.832485	0.353355	0.468894	0.871113	0.308913	0.685587	0.266457	0.281087	0.486749
		448.545	0.24696	0.647296	0.77744	0.832446	0.462519	1.22296	0.387418	0.508458	0.444664	0.541638	0.52947	0.448042	0.384704	0.439289	0.214641	0.736217	0.450964	0.239923	0.144412	0.415913	0.575179	0.538979	0.228078	0.191518	0.431068	0.389149	0.350858	0.349921	0.452059	0.227775	0.587641	0.29295	0.524446	0.798144	0.494641	0.644843	0.314471	0.408362	0.879234	0.363494	0.529837	0.916326	0.305838	0.703931	0.309106	0.328634	0.493295
		448.936	0.250547	0.639163	0.827152	0.803588	0.482719	1.22319	0.379693	0.514677	0.435246	0.545534	0.521862	0.407571	0.403845	0.458351	0.256802	0.767559	0.407117	0.235715	0.17186	0.465596	0.587926	0.59228	0.22906	0.162105	0.417345	0.35732	0.302049	0.342414	0.51138	0.228176	0.620214	0.30016	0.511933	0.80183	0.506747	0.65784	0.324965	0.471	0.837353	0.373317	0.519313	0.926644	0.306382	0.718301	0.281951	0.30756	0.450426
		449.327	0.266615	0.650048	0.817873	0.74078	0.509274	1.24148	0.396204	0.524359	0.460555	0.546354	0.567102	0.449916	0.413632	0.456336	0.277737	0.746192	0.441141	0.255456	0.190779	0.423137	0.608427	0.599844	0.222959	0.18071	0.42283	0.423182	0.357295	0.357297	0.473281	0.251667	0.596907	0.278284	0.548246	0.779286	0.496503	0.705038	0.312911	0.403722	0.846792	0.367465	0.540812	0.943193	0.348668	0.703358	0.27725	0.331921	0.504066
		449.718	0.25305	0.645762	0.803091	0.795035	0.514545	1.24226	0.389505	0.612136	0.455234	0.553628	0.561164	0.451331	0.42337	0.432901	0.263256	0.74418	0.442938	0.249928	0.191788	0.456775	0.610598	0.546869	0.231634	0.202213	0.440174	0.386037	0.379664	0.405247	0.463982	0.233928	0.666297	0.317104	0.535003	0.832157	0.478666	0.680366	0.302008	0.38056	0.871443	0.384841	0.492194	0.930439	0.298521	0.712829	0.298925	0.308478	0.514677
		450.109	0.23602	0.643387	0.842546	0.826443	0.508953	1.2318	0.387842	0.536085	0.442685	0.59165	0.542954	0.446005	0.410494	0.471808	0.28352	0.72018	0.450679	0.25108	0.22166	0.428343	0.610123	0.622508	0.233631	0.188686	0.46383	0.414637	0.340258	0.370717	0.518995	0.257936	0.678687	0.304109	0.562749	0.816864	0.501971	0.686252	0.325534	0.325614	0.84752	0.391435	0.532716	0.89284	0.336719	0.711035	0.29924	0.288642	0.511545
		450.5	0.214373	0.668603	0.851762	0.810736	0.518024	1.30147	0.395298	0.535455	0.445502	0.600995	0.574131	0.448973	0.424114	0.450124	0.275549	0.847575	0.414388	0.250701	0.185908	0.431807	0.626585	0.632378	0.224879	0.18479	0.443578	0.39395	0.360224	0.378071	0.526003	0.245826	0.687451	0.320074	0.559444	0.832069	0.538856	0.71987	0.325382	0.37835	0.854864	0.367513	0.486173	0.836465	0.333207	0.74832	0.294913	0.359611	0.539527
		450.892	0.25478	0.661448	0.843361	0.824432	0.536475	1.3337	0.427018	0.499619	0.448601	0.623469	0.558496	0.463606	0.422691	0.442988	0.249123	0.753451	0.450242	0.27632	0.204206	0.430147	0.613896	0.610415	0.232861	0.207455	0.451259	0.351847	0.396686	0.390524	0.538964	0.241127	0.676704	0.308339	0.554967	0.833818	0.511544	0.736524	0.320411	0.442358	0.896869	0.385794	0.517651	0.860823	0.344133	0.810408	0.29019	0.341478	0.562946
		451.283	0.228012	0.668125	0.827117	0.841707	0.509821	1.29446	0.400928	0.532311	0.488251	0.572551	0.544117	0.467377	0.44219	0.47486	0.271412	0.815814	0.480429	0.262583	0.171496	0.437429	0.654747	0.57056	0.253013	0.198126	0.472016	0.397063	0.353642	0.376349	0.530034	0.235915	0.669365	0.339768	0.555595	0.856315	0.537455	0.719518	0.328485	0.476301	0.864587	0.410523	0.592269	0.900618	0.335831	0.767061	0.304414	0.332808	0.544295
		451.674	0.240827	0.668579	0.905651	0.894382	0.532801	1.30795	0.422513	0.567012	0.478045	0.610925	0.569958	0.49309	0.432467	0.476224	0.273417	0.763245	0.488099	0.269142	0.155482	0.456471	0.652771	0.702318	0.262341	0.160899	0.46251	0.365198	0.369605	0.387685	0.507751	0.230828	0.724366	0.336065	0.575588	0.850848	0.532058	0.693761	0.328981	0.449805	0.932732	0.404231	0.554724	0.906304	0.372875	0.796764	0.307025	0.378332	0.530184
		452.065	0.259281	0.700388	0.892006	0.866085	0.554869	1.35257	0.450624	0.532089	0.506096	0.611913	0.574864	0.478339	0.423811	0.477228	0.268406	0.726984	0.474677	0.28215	0.201707	0.431633	0.643218	0.713682	0.253914	0.210847	0.475574	0.380661	0.387586	0.394232	0.551461	0.236138	0.685756	0.345645	0.585052	0.86767	0.534326	0.741879	0.331529	0.422407	0.95508	0.419676	0.58283	0.903793	0.366772	0.721045	0.311252	0.339485	0.558095
		452.456	0.263896	0.691042	0.902628	0.881171	0.556781	1.39271	0.395979	0.583493	0.489834	0.649658	0.583936	0.461721	0.433102	0.512578	0.251207	0.853306	0.479622	0.274513	0.210449	0.51837	0.688636	0.61755	0.250589	0.166696	0.478559	0.474788	0.365666	0.373159	0.54476	0.238894	0.713795	0.338652	0.591072	0.886553	0.548681	0.761895	0.333347	0.446956	0.9661	0.406808	0.538188	0.922277	0.352882	0.814671	0.321854	0.351081	0.59071
		452.847	0.227513	0.723291	0.916785	0.852438	0.555839	1.32797	0.453979	0.567049	0.469735	0.592552	0.610659	0.51519	0.465368	0.477872	0.278933	0.824502	0.483046	0.294975	0.227538	0.455299	0.643876	0.627028	0.27004	0.202053	0.473585	0.435063	0.406304	0.399321	0.552331	0.245026	0.725627	0.300845	0.591595	0.877655	0.545018	0.75861	0.347002	0.504357	0.91419	0.40684	0.609077	0.94634	0.366316	0.822934	0.326956	0.349258	0.548049
		453.238	0.256539	0.683749	0.915553	0.907242	0.547812	1.50285	0.451974	0.612305	0.47815	0.690741	0.612003	0.478718	0.449098	0.547394	0.308071	0.701353	0.510418	0.269831	0.192878	0.498436	0.692543	0.68692	0.273398	0.183724	0.485278	0.390573	0.391983	0.378151	0.579643	0.280627	0.742978	0.355042	0.600994	0.910367	0.552008	0.751173	0.348032	0.470962	0.980666	0.415313	0.612738	1.02969	0.368841	0.808854	0.328858	0.34761	0.582144
		453.629	0.252215	0.739403	0.9303	0.911429	0.57447	1.41127	0.455339	0.619542	0.47044	0.655845	0.634746	0.502805	0.4797	0.560365	0.276853	0.890629	0.51673	0.293975	0.188978	0.447303	0.69942	0.601239	0.278262	0.198452	0.506004	0.437711	0.397643	0.395139	0.531913	0.262995	0.763803	0.340018	0.597342	0.913814	0.54218	0.766765	0.337637	0.414795	0.949374	0.452639	0.632069	1.02173	0.379308	0.785029	0.353411	0.36321	0.616136
		454.02	0.257866	0.73817	0.973424	0.8995	0.576611	1.39705	0.461389	0.614582	0.489684	0.685115	0.627607	0.526232	0.476336	0.483864	0.310562	0.825849	0.480595	0.304475	0.184093	0.485441	0.717185	0.671097	0.304264	0.218826	0.49331	0.384393	0.413145	0.400409	0.562501	0.264928	0.734334	0.341962	0.605072	0.910041	0.57345	0.792351	0.375713	0.519617	1.00687	0.43973	0.635538	0.934438	0.327412	0.803642	0.335999	0.372337	0.6098
		454.411	0.249786	0.755052	0.984558	0.949638	0.603014	1.46639	0.448575	0.582481	0.485954	0.682165	0.617687	0.55067	0.47915	0.511357	0.325821	0.916013	0.537892	0.308083	0.198583	0.481047	0.703221	0.638531	0.277449	0.202783	0.499796	0.420518	0.415152	0.395235	0.58593	0.246396	0.770481	0.344756	0.592594	0.936496	0.577936	0.720125	0.380764	0.477656	1.03022	0.415398	0.583532	0.898022	0.37683	0.865433	0.334707	0.38856	0.623703
		454.802	0.260826	0.759796	0.984234	0.934883	0.601367	1.46596	0.467835	0.609574	0.507923	0.740451	0.649799	0.510999	0.468191	0.521446	0.318781	0.877156	0.513196	0.279746	0.222057	0.497832	0.706526	0.653297	0.274725	0.21924	0.523803	0.439217	0.387767	0.450143	0.569354	0.257424	0.825621	0.360894	0.648197	0.903161	0.566684	0.754235	0.350639	0.447204	0.963561	0.426481	0.638479	0.870278	0.382359	0.827087	0.334454	0.40266	0.588021
		455.193	0.284146	0.75306	0.958902	0.929372	0.570336	1.47929	0.468171	0.618545	0.521695	0.733733	0.655429	0.551749	0.477012	0.515615	0.289055	0.91628	0.524263	0.295595	0.220867	0.472253	0.722932	0.675916	0.287379	0.198073	0.555428	0.456024	0.393831	0.436149	0.58183	0.259885	0.806606	0.360694	0.621185	0.938132	0.580612	0.713998	0.366538	0.440818	1.03506	0.439921	0.594903	1.04577	0.389456	0.866931	0.338465	0.398706	0.651225
		455.585	0.301257	0.779084	1.01286	0.902661	0.628836	1.55353	0.493649	0.619583	0.503413	0.704	0.655352	0.529017	0.481568	0.52956	0.3026	0.829301	0.535033	0.310423	0.24312	0.507482	0.743155	0.690407	0.284544	0.173342	0.53688	0.456357	0.421152	0.439592	0.586062	0.282073	0.771043	0.347809	0.656784	0.96529	0.598555	0.834429	0.36964	0.45959	1.03879	0.423891	0.629466	0.96089	0.391775	0.942448	0.338758	0.406122	0.617665
		455.976	0.321847	0.769944	0.98335	0.996356	0.60961	1.55206	0.486018	0.61836	0.521707	0.703892	0.652297	0.552617	0.492829	0.538729	0.313596	0.853886	0.567589	0.314533	0.291102	0.499404	0.735206	0.694163	0.301571	0.192586	0.552145	0.442886	0.40272	0.460146	0.591086	0.282528	0.814066	0.363597	0.645057	0.95022	0.59048	0.811985	0.366927	0.526897	1.07623	0.446394	0.651859	1.06642	0.373875	0.84	0.348479	0.374752	0.626666
		456.367	0.266975	0.825444	1.04697	0.952394	0.63865	1.49993	0.494233	0.655687	0.510929	0.705206	0.674891	0.552363	0.490456	0.52576	0.322291	0.914601	0.559672	0.321542	0.224116	0.508501	0.781145	0.651585	0.269569	0.210917	0.534715	0.456435	0.431699	0.469434	0.619366	0.270238	0.861424	0.368105	0.649149	0.981318	0.594747	0.794213	0.36679	0.514842	1.07856	0.475085	0.596014	0.909572	0.405124	0.849433	0.377164	0.430754	0.650188
		456.758	0.253396	0.774654	0.983673	0.976373	0.59408	1.54933	0.484132	0.639197	0.541718	0.782762	0.672301	0.564132	0.496267	0.551753	0.298056	0.905825	0.584462	0.308393	0.224713	0.506894	0.81993	0.733549	0.281062	0.217455	0.556462	0.474872	0.434492	0.443029	0.635294	0.281297	0.81146	0.352276	0.651351	0.979244	0.629389	0.816812	0.355529	0.462152	1.06784	0.448202	0.647253	1.04848	0.401356	0.860977	0.347428	0.421148	0.657806
		457.149	0.246717	0.810198	0.967254	1.01402	0.610318	1.49487	0.501512	0.671055	0.512686	0.775828	0.653612	0.569729	0.47437	0.534116	0.309368	0.99146	0.598071	0.311426	0.258239	0.546743	0.770779	0.661257	0.305564	0.212878	0.544318	0.445931	0.47018	0.48749	0.621344	0.277172	0.861151	0.35857	0.647608	0.95782	0.58771	0.862448	0.392563	0.541648	1.08225	0.472071	0.601371	1.16512	0.43707	0.867463	0.384313	0.395807	0.699657
		457.54	0.29275	0.798983	1.04998	0.980996	0.623827	1.60832	0.499911	0.673279	0.495525	0.738739	0.658817	0.604633	0.471392	0.567627	0.319653	0.911945	0.554256	0.318375	0.228149	0.559922	0.821238	0.730906	0.272866	0.225467	0.553295	0.457913	0.45212	0.499823	0.593327	0.262603	0.830896	0.355714	0.668807	1.00069	0.603451	0.871527	0.390688	0.54351	1.11036	0.440352	0.659216	0.963025	0.405422	0.902243	0.361142	0.396275	0.714982
		457.931	0.255609	0.799595	1.04377	0.969108	0.622643	1.61495	0.505331	0.714782	0.551462	0.796246	0.678015	0.549924	0.489759	0.543789	0.339953	1.00074	0.59176	0.306624	0.233494	0.532261	0.785485	0.744557	0.288097	0.221809	0.561761	0.469122	0.43004	0.492831	0.615841	0.270204	0.872254	0.388339	0.685414	0.980941	0.654302	0.878493	0.389326	0.535024	1.12315	0.467881	0.603397	0.940694	0.428227	0.944412	0.38527	0.378081	0.685692
		458.322	0.286017	0.792856	1.05744	0.981991	0.647415	1.61143	0.496678	0.679707	0.536784	0.761274	0.697031	0.593515	0.503231	0.580921	0.301296	0.933443	0.599421	0.330086	0.210059	0.539352	0.7799	0.758216	0.287869	0.242819	0.586671	0.513544	0.43374	0.479356	0.593515	0.296442	0.851954	0.379287	0.683699	0.994598	0.619016	0.889969	0.376572	0.540246	1.02968	0.468687	0.692918	1.03814	0.430224	0.927526	0.38391	0.398739	0.687699
		458.713	0.280608	0.838302	1.0664	1.05245	0.650923	1.55719	0.517634	0.698499	0.583303	0.723902	0.708061	0.59699	0.496137	0.574675	0.365686	0.968151	0.607498	0.351559	0.218365	0.516359	0.811179	0.699496	0.296559	0.255854	0.580539	0.439446	0.454269	0.487932	0.631005	0.296596	0.86184	0.373186	0.685526	1.03487	0.64887	0.869274	0.372215	0.562169	1.113	0.448051	0.629195	1.12622	0.420577	0.929844	0.380896	0.416028	0.682578
		459.104	0.306818	0.834012	1.04734	0.977648	0.662767	1.56482	0.539163	0.65184	0.558691	0.808675	0.679569	0.561837	0.470079	0.531078	0.313959	1.0136	0.585689	0.337106	0.253537	0.595195	0.805044	0.685981	0.323238	0.243948	0.581534	0.504395	0.4527	0.496698	0.59992	0.263992	0.877328	0.356054	0.698568	1.01373	0.676792	0.904448	0.373716	0.488493	1.13898	0.440071	0.691829	1.03609	0.436532	0.913017	0.37391	0.475594	0.699625
		459.495	0.271107	0.862556	1.07366	1.10126	0.670184	1.62667	0.517024	0.705764	0.551467	0.770708	0.675047	0.65323	0.478759	0.601691	0.352728	0.984659	0.582317	0.338082	0.254657	0.573189	0.821482	0.775989	0.298453	0.234417	0.575067	0.481581	0.447922	0.523053	0.614868	0.320071	0.912149	0.350566	0.697295	1.02103	0.623212	0.92269	0.365506	0.515101	1.1451	0.45811	0.670698	1.00012	0.426359	0.930219	0.397937	0.433169	0.71021
		459.886	0.281731	0.849109	1.07333	1.12207	0.664963	1.71403	0.492422	0.690618	0.535413	0.785556	0.674818	0.638918	0.488987	0.570788	0.343292	1.05573	0.571691	0.33335	0.208763	0.590933	0.827511	0.68489	0.314358	0.255972	0.592341	0.512362	0.497467	0.494921	0.623211	0.311438	0.871757	0.393701	0.710537	1.02129	0.617809	0.886444	0.354297	0.614804	1.094	0.47341	0.684135	1.08355	0.440541	0.956563	0.401937	0.435513	0.696696
		460.277	0.297937	0.875075	1.11084	1.03199	0.665394	1.66045	0.562489	0.699775	0.539984	0.838707	0.707035	0.623285	0.500933	0.595708	0.323859	0.983749	0.605365	0.326615	0.226265	0.606895	0.854072	0.706199	0.307927	0.234414	0.58565	0.481723	0.468771	0.48617	0.638509	0.291458	0.958138	0.388415	0.705481	1.06449	0.671023	0.890645	0.381904	0.582763	1.07369	0.493337	0.682474	1.00171	0.44776	0.953289	0.408736	0.466758	0.685203
		460.669	0.283382	0.842941	1.09315	1.06587	0.687889	1.69448	0.536254	0.704166	0.553344	0.801841	0.664418	0.627277	0.470628	0.568114	0.332188	0.96116	0.622618	0.331936	0.2322	0.605254	0.856553	0.789446	0.298053	0.22687	0.600709	0.50513	0.478975	0.511281	0.640454	0.326804	0.866189	0.399653	0.689567	1.02358	0.69546	0.924871	0.374032	0.531181	1.15307	0.48755	0.709845	1.15466	0.443081	0.955859	0.409855	0.471827	0.722716
		461.06	0.279706	0.860712	1.12196	1.03867	0.649004	1.67136	0.540418	0.721523	0.555512	0.808895	0.656956	0.629483	0.48112	0.579895	0.364499	1.04916	0.621017	0.33218	0.287654	0.578969	0.834788	0.686565	0.30695	0.207243	0.609314	0.511791	0.48822	0.514789	0.657681	0.295343	0.938672	0.395177	0.725515	1.07238	0.67884	0.986326	0.378866	0.506179	1.20895	0.491597	0.666461	1.16071	0.449364	0.955238	0.394182	0.459307	0.721433
		461.451	0.303189	0.888361	1.08323	1.07459	0.699811	1.69236	0.529	0.754203	0.556272	0.816537	0.672691	0.645225	0.495934	0.551355	0.363085	1.11004	0.622556	0.339413	0.241198	0.605075	0.820004	0.693291	0.301148	0.211288	0.584803	0.539246	0.493224	0.505129	0.634352	0.308357	0.936653	0.395713	0.671293	1.00993	0.670137	0.878054	0.37703	0.553867	1.16327	0.5002	0.695914	1.16838	0.459974	0.950078	0.404308	0.461185	0.727836
		461.842	0.293698	0.894804	1.12155	1.06536	0.701077	1.58527	0.55599	0.752318	0.571838	0.839764	0.686937	0.639533	0.46026	0.612996	0.369457	1.10428	0.632467	0.374718	0.250815	0.587225	0.828406	0.747237	0.314856	0.253495	0.620818	0.555063	0.468739	0.517405	0.630322	0.295852	0.940034	0.396064	0.694215	1.04711	0.673206	0.866229	0.382953	0.578073	1.23669	0.487562	0.723148	1.1952	0.48275	1.02038	0.37095	0.482388	0.756301
		462.233	0.282915	0.92077	1.08416	1.0406	0.691723	1.67157	0.561458	0.777141	0.563497	0.847942	0.660591	0.636597	0.500652	0.577415	0.358852	1.16234	0.631628	0.359177	0.252908	0.596786	0.800458	0.748678	0.329219	0.232648	0.625019	0.527232	0.478174	0.56092	0.668636	0.29966	0.897037	0.421862	0.708677	1.06853	0.716368	0.916792	0.38644	0.530095	1.24888	0.515133	0.739616	1.05039	0.449525	0.97782	0.388872	0.47069	0.771049
		462.624	0.272204	0.919602	1.11771	1.05987	0.690889	1.73782	0.598586	0.737364	0.607329	0.810227	0.719424	0.647131	0.474494	0.565921	0.345986	1.11797	0.625874	0.38278	0.285848	0.633164	0.887403	0.749592	0.342625	0.253976	0.631514	0.525816	0.50977	0.553724	0.639478	0.309936	0.957915	0.42302	0.720572	1.07183	0.662094	0.929403	0.364375	0.629627	1.20063	0.49492	0.683171	0.989248	0.457572	0.946699	0.42111	0.473043	0.705473
		463.015	0.289155	0.880814	1.16726	1.07559	0.678094	1.73861	0.586747	0.759232	0.577496	0.811172	0.692611	0.663315	0.542874	0.620773	0.347024	1.10274	0.644583	0.360856	0.289714	0.606196	0.860939	0.729498	0.311407	0.231685	0.627395	0.51424	0.46875	0.561413	0.659962	0.318491	0.918174	0.408023	0.720944	1.05049	0.715466	0.917347	0.37549	0.542551	1.27287	0.496588	0.723768	1.07874	0.517646	1.00589	0.427048	0.455351	0.720798
		463.406	0.30446	0.925694	1.17	1.0842	0.705328	1.74506	0.580491	0.840419	0.569541	0.892128	0.747428	0.662278	0.503472	0.597295	0.379473	1.14266	0.629138	0.370964	0.250006	0.594698	0.869788	0.847635	0.331909	0.248601	0.645332	0.491331	0.511342	0.51344	0.666292	0.320929	0.964812	0.377147	0.741838	1.05	0.682286	0.965508	0.362147	0.58793	1.24054	0.512693	0.763811	1.14709	0.464775	1.05813	0.407218	0.485999	0.760743
		463.797	0.320476	0.901902	1.10807	1.11902	0.703653	1.72177	0.585317	0.715614	0.597953	0.904793	0.71368	0.661327	0.510969	0.609513	0.363006	1.10932	0.637374	0.375597	0.250915	0.625228	0.825504	0.739673	0.325989	0.245137	0.648177	0.581831	0.487774	0.550202	0.671049	0.308499	0.950217	0.425057	0.712647	1.03683	0.710141	0.990367	0.413391	0.429591	1.23039	0.526717	0.783839	1.13779	0.472141	1.02778	0.442449	0.486921	0.758556
		464.188	0.304386	0.890061	1.14262	1.0565	0.709882	1.75757	0.598749	0.771475	0.585305	0.943026	0.748894	0.653612	0.547511	0.600814	0.354948	1.08349	0.685834	0.39525	0.268972	0.566706	0.894805	0.765346	0.341114	0.235367	0.665615	0.55285	0.516336	0.521485	0.658873	0.329962	0.980633	0.427663	0.720672	1.03269	0.730522	1.00787	0.393131	0.513068	1.25604	0.496949	0.761252	1.14877	0.473223	1.00804	0.435296	0.513943	0.819219
		464.579	0.266566	0.919585	1.16741	1.0941	0.686928	1.79722	0.598437	0.791061	0.591822	0.913607	0.758663	0.711853	0.537951	0.638773	0.325398	1.16411	0.664484	0.370759	0.259492	0.636789	0.883232	0.75694	0.323978	0.20436	0.623472	0.580502	0.525917	0.547635	0.660885	0.34559	0.910869	0.409634	0.727433	1.06981	0.699361	1.00456	0.364604	0.50133	1.19918	0.500004	0.747961	1.08242	0.49659	0.975864	0.404107	0.481634	0.776968
		464.97	0.324761	0.901547	1.16351	1.05318	0.748998	1.84507	0.598804	0.781398	0.577513	0.916545	0.7161	0.693818	0.533808	0.66735	0.314667	1.15045	0.705506	0.370176	0.282679	0.64477	0.894134	0.805403	0.334679	0.235194	0.673904	0.513447	0.519311	0.560833	0.665107	0.306963	0.976349	0.384314	0.737681	1.05289	0.745727	0.943862	0.438075	0.644245	1.26765	0.514341	0.740957	1.11479	0.47851	1.00458	0.458496	0.537093	0.7546
		465.362	0.289296	0.948019	1.14514	1.15799	0.693013	1.72197	0.602191	0.800287	0.559413	0.893304	0.785647	0.664729	0.530111	0.595829	0.361144	1.17004	0.706726	0.391142	0.279828	0.586954	0.901095	0.757633	0.328757	0.260144	0.671331	0.595837	0.541298	0.562023	0.680678	0.336218	0.968786	0.406714	0.763015	1.08566	0.730667	0.94465	0.460604	0.541669	1.21526	0.507799	0.753589	1.16263	0.500348	1.05061	0.444529	0.492454	0.799689
		465.753	0.299746	0.96745	1.11285	1.17047	0.706429	1.79885	0.602416	0.776034	0.574579	0.929146	0.843877	0.722457	0.558963	0.621412	0.332021	1.12189	0.687536	0.386596	0.249172	0.677872	0.920021	0.758997	0.329127	0.232368	0.674108	0.538236	0.544024	0.575314	0.678907	0.346232	0.967164	0.413079	0.747469	1.0775	0.722092	0.947051	0.432267	0.533681	1.23537	0.534468	0.731754	1.17226	0.51658	1.07284	0.468049	0.512207	0.811456
		466.144	0.285257	0.959934	1.14454	1.05712	0.731274	1.77482	0.59481	0.782935	0.606577	0.900142	0.81359	0.729713	0.595117	0.614259	0.349619	1.1004	0.650768	0.392694	0.269167	0.670919	0.903424	0.806407	0.338739	0.265293	0.679414	0.559818	0.512671	0.586396	0.682312	0.31633	0.952899	0.42405	0.741151	1.02646	0.790021	0.953645	0.433621	0.566328	1.24719	0.495527	0.755568	1.21476	0.50033	1.04044	0.398981	0.476851	0.773108
		466.535	0.297105	0.923567	1.13468	1.17456	0.735422	1.81175	0.595414	0.829341	0.575002	0.907302	0.832752	0.722572	0.579631	0.626367	0.369179	1.14526	0.689935	0.383737	0.266721	0.684519	0.877074	0.823977	0.343376	0.314254	0.663908	0.565547	0.52348	0.554468	0.706386	0.344375	0.986156	0.442475	0.750318	1.08601	0.698805	0.971178	0.444117	0.558997	1.29264	0.528317	0.741437	1.17601	0.515781	1.0863	0.46017	0.525153	0.769491
		466.926	0.284269	0.92325	1.18947	1.16844	0.73454	1.75733	0.626478	0.841107	0.567507	0.89759	0.800822	0.793095	0.588124	0.663302	0.363012	1.1306	0.703397	0.366023	0.22038	0.679592	0.887142	0.824833	0.338267	0.257933	0.664733	0.4958	0.567176	0.576678	0.679091	0.335391	1.00567	0.404678	0.777615	1.075	0.74081	0.96523	0.445118	0.561388	1.33565	0.510188	0.750442	1.24226	0.531946	1.07293	0.432623	0.473231	0.727041
		467.317	0.246144	0.989389	1.18835	1.12231	0.724434	1.82802	0.632632	0.820663	0.582567	0.894397	0.833572	0.703098	0.607994	0.629106	0.357227	1.18904	0.698788	0.377281	0.237499	0.689367	0.93928	0.804639	0.349014	0.220631	0.676401	0.51211	0.552274	0.589353	0.686427	0.331354	1.01093	0.391404	0.767345	1.09505	0.728972	0.976374	0.439221	0.536441	1.28466	0.523873	0.765871	1.17948	0.507207	1.09169	0.450113	0.522933	0.818382
		467.708	0.285958	0.97298	1.20338	1.12481	0.756496	1.87971	0.599988	0.799555	0.63185	0.893953	0.830534	0.707423	0.565957	0.639007	0.389288	1.21816	0.748035	0.406863	0.280718	0.620185	0.922873	0.852633	0.354987	0.216309	0.721324	0.522419	0.558263	0.583941	0.695452	0.325302	0.966757	0.410209	0.775842	1.12073	0.747443	1.10745	0.462635	0.509082	1.3011	0.503184	0.776308	1.20205	0.487125	1.01683	0.4688	0.548416	0.780139
		468.099	0.275162	0.98003	1.16118	1.12432	0.749462	1.79869	0.620608	0.821692	0.585672	0.973619	0.88193	0.730354	0.603	0.667041	0.374204	1.25536	0.721007	0.399472	0.302647	0.660408	0.915699	0.839152	0.338218	0.221234	0.671453	0.578196	0.521635	0.581546	0.673641	0.338341	1.01468	0.406286	0.770327	1.12697	0.739322	0.973903	0.47819	0.598216	1.26275	0.51057	0.725004	1.17671	0.474273	0.994294	0.454447	0.506772	0.802963
		468.49	0.295808	0.93419	1.14994	1.12891	0.735309	1.89962	0.619806	0.856785	0.610976	0.954129	0.849102	0.74993	0.608977	0.642255	0.390725	1.18625	0.689735	0.399698	0.273069	0.684951	0.865491	0.817459	0.359581	0.21174	0.698039	0.531463	0.56091	0.604431	0.67665	0.341521	0.99099	0.435239	0.746422	1.0779	0.743166	1.00163	0.467212	0.596023	1.29497	0.525145	0.757714	1.2405	0.518702	1.04623	0.443204	0.535024	0.769411
		468.881	0.293466	0.950456	1.18471	1.03074	0.730665	1.78153	0.652349	0.889835	0.585206	0.924801	0.86793	0.735345	0.633578	0.657244	0.378735	1.29091	0.70888	0.413463	0.295121	0.660838	0.881947	0.786027	0.355873	0.287818	0.687663	0.565263	0.543559	0.633959	0.681359	0.328862	0.977152	0.425201	0.756934	1.14727	0.751205	1.0497	0.446256	0.5969	1.26341	0.512613	0.739927	1.1333	0.504395	1.10129	0.452056	0.514461	0.792792
		469.272	0.310499	1.01246	1.176	1.12231	0.779708	1.85459	0.662866	0.878551	0.578442	0.952303	0.865824	0.740353	0.657136	0.675688	0.350313	1.24702	0.75581	0.378297	0.273092	0.636348	0.880766	0.904805	0.35196	0.283597	0.726152	0.577985	0.564659	0.590367	0.671053	0.319175	1.00499	0.419086	0.769673	1.11124	0.737782	0.967441	0.447477	0.553999	1.34443	0.514316	0.81174	1.22242	0.518294	1.04965	0.457446	0.513904	0.779055
		469.663	0.29602	0.978973	1.17531	1.08753	0.738393	1.89309	0.650951	0.826109	0.593834	0.990474	0.909295	0.769859	0.597421	0.633317	0.36104	1.25858	0.714279	0.394552	0.293348	0.659605	0.890735	0.877679	0.353623	0.263617	0.723632	0.571615	0.53203	0.609644	0.679822	0.344127	1.03393	0.429408	0.74028	1.1234	0.757538	0.97677	0.464097	0.545757	1.31076	0.525844	0.755661	1.1924	0.507769	1.08419	0.439483	0.517592	0.803972
		470.054	0.325254	0.97903	1.20113	1.19821	0.750923	1.86948	0.66494	0.886568	0.586717	0.97933	0.917819	0.736642	0.639378	0.666166	0.413661	1.31389	0.76705	0.417472	0.258301	0.673647	0.914783	0.89322	0.373176	0.209148	0.697996	0.51521	0.545686	0.601409	0.692575	0.351101	1.04625	0.446917	0.767508	1.14567	0.764624	0.985504	0.460422	0.582747	1.38241	0.52921	0.791013	1.17058	0.506409	1.10908	0.466616	0.568913	0.803553
		470.446	0.307472	0.940994	1.24155	1.18725	0.751946	1.84118	0.651858	0.865153	0.599848	0.985256	0.868397	0.768802	0.626386	0.635806	0.356793	1.18044	0.749557	0.399076	0.286085	0.624978	0.929597	0.858781	0.339827	0.266936	0.726536	0.560371	0.567342	0.608892	0.67873	0.32613	1.07708	0.426037	0.79833	1.13551	0.773531	1.04811	0.46172	0.63611	1.35169	0.55211	0.761367	1.22832	0.526963	1.03288	0.473668	0.524592	0.792748
		470.837	0.276407	0.932371	1.21893	1.13837	0.778818	1.9256	0.67168	0.837117	0.585293	1.0615	0.917625	0.76925	0.633266	0.668492	0.406694	1.26964	0.753851	0.423013	0.315523	0.702051	0.899045	0.851651	0.370688	0.252869	0.710995	0.535098	0.559247	0.639033	0.674034	0.378559	1.02446	0.422163	0.758504	1.13403	0.76067	0.996706	0.479454	0.569673	1.31896	0.523121	0.779312	1.12393	0.519307	1.18118	0.467078	0.575396	0.780466
		471.228	0.291027	0.939261	1.22593	1.18698	0.766028	1.85136	0.654596	0.849704	0.589398	1.00839	0.86992	0.784804	0.643645	0.673916	0.403239	1.21884	0.771091	0.418287	0.29583	0.635659	0.942622	0.854706	0.35032	0.265347	0.71483	0.508547	0.570769	0.608791	0.693487	0.35839	1.03488	0.415906	0.762727	1.14784	0.772745	1.0548	0.502336	0.633711	1.30664	0.506177	0.79575	1.19666	0.510792	1.11096	0.500661	0.578712	0.763094
		471.619	0.314758	0.947667	1.25183	1.21222	0.761538	1.89772	0.707422	0.881545	0.598104	1.02631	0.892648	0.759785	0.626611	0.670647	0.436439	1.40936	0.747094	0.439916	0.263804	0.707046	0.926853	0.846601	0.368346	0.287794	0.756676	0.555615	0.560393	0.620459	0.721364	0.330403	0.999038	0.420061	0.810966	1.10509	0.782697	0.994485	0.437258	0.561579	1.36973	0.551615	0.780644	1.1472	0.536675	1.08888	0.479074	0.567299	0.797111
		472.01	0.332389	0.982052	1.27523	1.15219	0.772844	1.93064	0.665829	0.838215	0.590132	1.08378	0.894123	0.819195	0.620323	0.662462	0.399547	1.18497	0.74962	0.415112	0.273567	0.697332	0.946635	0.894571	0.367934	0.255866	0.737054	0.546058	0.546099	0.620424	0.688942	0.316829	1.0774	0.421077	0.769844	1.12752	0.730919	1.04931	0.454461	0.543661	1.38305	0.5645	0.781951	1.13673	0.51096	1.09894	0.466392	0.581072	0.828081
		472.401	0.318278	1.03761	1.21	1.16079	0.735037	1.8514	0.668286	0.885189	0.568646	1.01918	0.893053	0.770382	0.633595	0.726551	0.354289	1.32912	0.768227	0.420922	0.265106	0.707362	0.966398	0.840383	0.365092	0.231742	0.746281	0.551195	0.536644	0.615844	0.712799	0.350047	0.980764	0.417912	0.821929	1.10039	0.778311	1.06105	0.469988	0.644272	1.45022	0.524807	0.840904	1.19426	0.527017	1.07927	0.485075	0.567611	0.856722
		472.792	0.307776	0.966755	1.21701	1.22256	0.737647	1.83586	0.664699	0.904205	0.6103	1.09638	0.909674	0.766024	0.604047	0.667906	0.384979	1.34141	0.828747	0.446377	0.277262	0.741141	0.909175	0.877433	0.353643	0.2702	0.761868	0.555672	0.563053	0.613953	0.723622	0.342454	1.01745	0.421463	0.778524	1.1257	0.769261	0.968676	0.465784	0.579337	1.40716	0.545472	0.809158	1.27244	0.509234	1.12333	0.456718	0.552203	0.83597
		473.183	0.298073	0.999831	1.22283	1.18116	0.762087	1.91042	0.69404	0.888707	0.576457	1.04649	0.93147	0.767314	0.648515	0.702576	0.435044	1.22683	0.737381	0.421686	0.300709	0.710133	0.970407	0.872441	0.335793	0.271246	0.722393	0.545905	0.548223	0.618359	0.722216	0.327094	1.06138	0.428412	0.787234	1.15442	0.755932	1.11371	0.467687	0.558329	1.37526	0.559091	0.825995	1.18054	0.511843	1.14991	0.466638	0.619277	0.811429
		473.574	0.271533	1.03332	1.21501	1.16417	0.747396	1.95764	0.706628	0.890664	0.61813	1.03176	0.900246	0.748284	0.63839	0.686266	0.37848	1.34906	0.759537	0.447122	0.264778	0.694868	0.929449	0.902135	0.353928	0.214656	0.759669	0.55172	0.58435	0.586527	0.724189	0.33372	1.04529	0.441844	0.811155	1.14	0.774074	1.05668	0.454054	0.543026	1.39622	0.526362	0.769975	1.14078	0.52834	1.05763	0.483922	0.559842	0.866905
		473.965	0.288104	1.01727	1.25718	1.19529	0.77124	1.94717	0.721522	0.883459	0.568242	1.05157	0.939808	0.806115	0.633257	0.668221	0.411766	1.39198	0.744377	0.421956	0.317333	0.723788	0.919177	0.918133	0.34444	0.280805	0.74669	0.591406	0.576728	0.651473	0.735186	0.372527	1.03117	0.434373	0.792797	1.11579	0.775659	1.00364	0.450818	0.597844	1.43059	0.547398	0.827818	1.11599	0.543368	1.13226	0.465236	0.577641	0.878343
		474.356	0.308363	0.991217	1.22569	1.17913	0.79491	1.84911	0.681936	0.870165	0.596418	1.09566	0.906528	0.790733	0.621221	0.641296	0.371421	1.22352	0.772232	0.441057	0.274858	0.721525	0.897558	0.875995	0.362165	0.272467	0.763345	0.577384	0.559259	0.636263	0.754494	0.346857	1.06313	0.409093	0.794859	1.1339	0.80026	1.07907	0.473573	0.573906	1.41323	0.551427	0.792377	1.23359	0.530639	1.10088	0.466203	0.565044	0.840039
		474.747	0.296478	1.01765	1.23172	1.26119	0.800103	1.95924	0.704622	0.877927	0.607137	1.04715	0.937195	0.782536	0.631151	0.696357	0.402986	1.34865	0.782686	0.431776	0.332634	0.715759	0.901628	0.929523	0.377583	0.256115	0.752795	0.525328	0.587828	0.666702	0.721451	0.357291	1.03863	0.421655	0.808568	1.11415	0.789375	1.02342	0.464241	0.597201	1.44755	0.539831	0.795076	1.32677	0.555493	1.12571	0.469199	0.560278	0.847077
		475.139	0.286186	0.977379	1.27529	1.20842	0.789281	1.88112	0.70753	0.874281	0.597663	1.12061	0.929792	0.801861	0.625672	0.663513	0.387764	1.30206	0.758491	0.43525	0.256966	0.734951	1.00173	0.912238	0.386185	0.280918	0.737367	0.590669	0.575998	0.668666	0.715202	0.363689	1.04473	0.441411	0.802221	1.13844	0.815036	1.1054	0.473846	0.564536	1.40205	0.526152	0.815114	1.1995	0.557198	1.16649	0.46796	0.597685	0.805453
		475.53	0.294614	0.982629	1.24942	1.16312	0.781483	1.91836	0.683426	0.86703	0.608925	1.05016	0.898821	0.790449	0.635042	0.670099	0.380849	1.39938	0.771686	0.447248	0.276494	0.695333	0.930418	0.865728	0.374456	0.236361	0.767945	0.530578	0.596853	0.657143	0.723081	0.359079	1.10577	0.43925	0.780366	1.12918	0.796136	1.10993	0.43854	0.56589	1.39811	0.527386	0.806339	1.12901	0.56207	1.13446	0.491606	0.580107	0.802988
		475.921	0.307922	1.04324	1.2533	1.13319	0.786827	2.00677	0.731917	0.875937	0.589537	1.04084	0.935772	0.79681	0.646266	0.700275	0.396736	1.34982	0.779996	0.442551	0.322705	0.750291	0.985839	0.904213	0.370284	0.285986	0.759719	0.534932	0.61457	0.656923	0.707584	0.366535	1.13792	0.459679	0.782792	1.11396	0.775451	1.10006	0.466493	0.621522	1.40083	0.553057	0.789722	1.19526	0.579902	1.13756	0.475089	0.576278	0.860954
		476.312	0.272976	1.00364	1.31924	1.1617	0.839316	1.97145	0.687826	0.908959	0.571244	1.08835	0.947265	0.818952	0.642698	0.706517	0.40381	1.29492	0.791528	0.43433	0.314391	0.693577	0.981262	0.869816	0.36916	0.272228	0.772958	0.518973	0.612875	0.680618	0.701232	0.34005	1.07003	0.42162	0.814677	1.09802	0.770948	1.10051	0.470644	0.622589	1.37553	0.542653	0.882022	1.2354	0.550826	1.12977	0.524861	0.587002	0.821758
		476.703	0.308841	0.995539	1.30602	1.18607	0.77842	1.84982	0.732442	0.936986	0.569123	1.06795	0.922447	0.804084	0.630637	0.668019	0.389202	1.3337	0.79187	0.443087	0.314743	0.705803	1.04007	0.886418	0.364038	0.252336	0.781767	0.554359	0.585148	0.641458	0.742553	0.329345	1.09359	0.424293	0.780389	1.1236	0.79331	1.05327	0.489158	0.567809	1.41703	0.574022	0.794817	1.20049	0.541519	1.11447	0.495669	0.583749	0.81654
		477.094	0.314272	0.991963	1.28379	1.24764	0.767642	1.91654	0.737972	0.92165	0.584192	1.08541	0.90965	0.835788	0.636952	0.68669	0.385265	1.32031	0.75635	0.444348	0.301872	0.739507	0.935278	0.905096	0.374391	0.286274	0.747643	0.54782	0.580831	0.655657	0.723007	0.382954	1.14676	0.430068	0.785408	1.13216	0.797704	1.09289	0.493521	0.592476	1.41886	0.529579	0.804748	1.21338	0.579271	1.18088	0.470996	0.594073	0.857124
		477.485	0.300846	0.986577	1.29616	1.15135	0.756426	1.92506	0.739289	0.946392	0.577187	1.04023	0.960793	0.802348	0.630532	0.676553	0.392502	1.32561	0.738864	0.427385	0.313849	0.690396	0.964952	0.884928	0.383871	0.260936	0.760118	0.541656	0.581265	0.698721	0.706203	0.357191	1.04489	0.405833	0.828165	1.12074	0.811023	1.10121	0.445218	0.542907	1.47943	0.539681	0.828699	1.15029	0.560297	1.16252	0.501268	0.593598	0.773853
		477.876	0.306256	1.04456	1.29131	1.15398	0.815544	2.01532	0.698328	0.989279	0.583717	1.08218	0.922775	0.830483	0.65197	0.679643	0.394921	1.41968	0.77295	0.4471	0.281183	0.758011	0.963452	0.885586	0.372318	0.233761	0.778165	0.526131	0.611745	0.655155	0.742388	0.348135	1.10426	0.468492	0.771901	1.12632	0.796093	1.10385	0.454799	0.610215	1.50598	0.537337	0.827375	1.14228	0.544906	1.10693	0.481289	0.60058	0.827027
		478.267	0.265775	1.07354	1.29959	1.16161	0.80996	1.92351	0.763511	0.916306	0.600288	1.17742	0.93992	0.865776	0.624643	0.674679	0.437715	1.31	0.777621	0.446696	0.276098	0.74556	0.937738	0.82024	0.350727	0.258688	0.761501	0.591071	0.614225	0.697912	0.693809	0.333766	1.09198	0.436735	0.794243	1.1313	0.845402	1.04154	0.474635	0.61883	1.42227	0.53003	0.802005	1.24483	0.52723	1.17525	0.500123	0.594499	0.83537
		478.658	0.30765	1.03865	1.26986	1.15	0.825127	1.91795	0.727045	0.929908	0.605642	1.05871	0.933409	0.8118	0.612907	0.681298	0.394589	1.40156	0.838147	0.423701	0.249544	0.721607	0.974681	0.860984	0.402141	0.270069	0.774236	0.591504	0.602337	0.671422	0.695755	0.321532	1.11421	0.44049	0.792874	1.12978	0.817479	1.10541	0.485064	0.598877	1.51915	0.525429	0.785664	1.19437	0.581639	1.12953	0.486509	0.573187	0.834571
		479.049	0.285458	1.04859	1.29008	1.15717	0.797843	1.92368	0.735872	0.900002	0.597867	1.06484	0.948587	0.818175	0.641091	0.666204	0.393182	1.38895	0.827207	0.44169	0.304865	0.728606	0.973432	0.858238	0.38086	0.28365	0.787333	0.556277	0.621613	0.658677	0.688754	0.383033	1.08975	0.426816	0.801598	1.11927	0.783589	1.1392	0.461318	0.617107	1.51477	0.565939	0.844598	1.19292	0.561997	1.13521	0.504909	0.597296	0.823839
		479.44	0.312273	1.06321	1.29702	1.16741	0.787866	1.98767	0.713666	0.871214	0.580775	1.12796	0.93887	0.811479	0.647023	0.66154	0.381754	1.37426	0.776509	0.404686	0.278036	0.726038	0.946061	0.913139	0.375335	0.310907	0.79102	0.561948	0.585028	0.657646	0.714887	0.342555	1.00358	0.429573	0.812838	1.09606	0.79653	0.995444	0.472627	0.575855	1.49117	0.514813	0.767952	1.23158	0.535296	1.1866	0.494242	0.570389	0.871967
		479.831	0.281943	1.03344	1.31156	1.21223	0.769701	1.98726	0.735868	0.941559	0.595869	1.13951	0.991574	0.81071	0.642117	0.710352	0.397976	1.40725	0.758838	0.425786	0.272344	0.789503	0.998301	0.875432	0.374162	0.246172	0.785435	0.582621	0.606565	0.660109	0.717438	0.341887	1.04665	0.42832	0.802931	1.1095	0.81153	1.00839	0.4826	0.631824	1.50921	0.520999	0.778155	1.21637	0.563531	1.18879	0.464495	0.5873	0.838743
		480.223	0.296473	0.987688	1.35105	1.15832	0.812383	1.93713	0.700658	0.9841	0.543905	1.08343	0.968617	0.840067	0.663203	0.671252	0.394416	1.42221	0.768624	0.477986	0.299885	0.684538	0.95842	0.89429	0.363597	0.2478	0.817397	0.575535	0.591809	0.664753	0.715835	0.361972	1.04983	0.423442	0.765136	1.1411	0.819051	1.04524	0.477	0.68271	1.41735	0.512296	0.811126	1.19965	0.552455	1.15627	0.505225	0.609716	0.831656
		480.614	0.277786	1.00074	1.29117	1.10465	0.824758	2.01575	0.735858	0.921339	0.546551	1.18793	0.937289	0.850784	0.635076	0.684316	0.418673	1.47767	0.731243	0.436558	0.286	0.744843	0.948119	0.870611	0.387375	0.232163	0.772278	0.57611	0.604787	0.684489	0.698033	0.397978	1.07414	0.416167	0.813887	1.10435	0.835479	1.04017	0.463665	0.653584	1.41762	0.530727	0.833218	1.19752	0.589223	1.13742	0.486786	0.628169	0.816994
		481.005	0.275358	1.04562	1.2776	1.2111	0.825828	1.96014	0.732753	0.946599	0.568239	1.14831	0.949407	0.812799	0.648908	0.675328	0.373593	1.4509	0.786917	0.442788	0.322092	0.71893	0.974332	0.858823	0.362666	0.273358	0.798946	0.574062	0.614075	0.647579	0.711379	0.346216	1.02832	0.430815	0.772167	1.10984	0.783999	1.08845	0.48039	0.573391	1.50463	0.525081	0.758076	1.19499	0.550919	1.10438	0.488763	0.594222	0.810903
		481.396	0.295818	1.02461	1.27735	1.23865	0.795948	1.8956	0.72734	0.938064	0.570042	1.12379	0.96886	0.829138	0.630241	0.667639	0.401358	1.44616	0.797822	0.438315	0.282065	0.74975	0.919284	0.87312	0.39304	0.223794	0.791776	0.57998	0.605044	0.682023	0.68831	0.365787	1.10938	0.405111	0.798957	1.12213	0.794846	1.02908	0.468435	0.622777	1.46367	0.53213	0.788505	1.20812	0.573022	1.15662	0.484595	0.621765	0.846444
		481.787	0.313976	1.04638	1.29366	1.19604	0.809765	1.88556	0.734941	0.900896	0.58774	1.16148	0.923714	0.819635	0.643908	0.65013	0.384986	1.41965	0.808038	0.440287	0.297316	0.718567	0.956801	0.985984	0.37999	0.294019	0.793176	0.59522	0.574458	0.693817	0.720453	0.329746	1.06637	0.430162	0.784545	1.1256	0.781869	1.03861	0.450494	0.649596	1.39698	0.491501	0.872551	1.11127	0.573359	1.14895	0.494676	0.619755	0.824853
		482.178	0.299212	1.03407	1.28334	1.1952	0.798557	1.89977	0.745413	0.911801	0.588987	1.16109	0.964293	0.7972	0.677848	0.687107	0.451444	1.41573	0.792251	0.46079	0.302977	0.738583	0.902027	0.891604	0.35036	0.267803	0.763938	0.56952	0.613863	0.653899	0.691605	0.372191	1.13148	0.434939	0.781629	1.09549	0.806667	1.11836	0.445816	0.573073	1.45328	0.514906	0.779488	1.19052	0.551811	1.14531	0.501731	0.621605	0.768792
		482.569	0.267747	0.978575	1.29199	1.23883	0.8013	1.9028	0.737295	0.995189	0.553565	1.07071	0.930958	0.826207	0.659023	0.675541	0.439194	1.36215	0.865277	0.43898	0.266752	0.747148	0.919193	0.894432	0.364926	0.301361	0.797463	0.566164	0.573851	0.670456	0.701268	0.356942	1.08779	0.421777	0.76344	1.11164	0.798501	1.12722	0.456776	0.653292	1.48128	0.519964	0.833328	1.11208	0.587729	1.17874	0.476385	0.622652	0.788024
		482.96	0.277531	1.02265	1.26063	1.17169	0.798146	1.95873	0.741574	0.915169	0.557723	1.14082	0.952525	0.852804	0.658485	0.681845	0.421193	1.48337	0.821605	0.448535	0.305086	0.724039	0.970712	0.919442	0.368486	0.272225	0.77616	0.610209	0.586832	0.717931	0.698366	0.352702	1.06558	0.455327	0.773663	1.07753	0.796269	1.10205	0.476214	0.579398	1.43749	0.50394	0.812065	1.1325	0.573961	1.1883	0.498342	0.631113	0.839907
		483.351	0.287394	1.02779	1.25794	1.14013	0.784187	1.85575	0.756255	0.910062	0.569549	1.16359	0.920684	0.836982	0.661968	0.692986	0.399622	1.49647	0.781781	0.444543	0.28814	0.760409	0.980297	0.86331	0.380454	0.260357	0.788976	0.564233	0.59953	0.701136	0.676995	0.335987	1.07441	0.430576	0.757379	1.09401	0.799139	1.05176	0.452978	0.651245	1.36949	0.530386	0.791124	1.11992	0.566283	1.1347	0.497105	0.660137	0.742824
		483.742	0.29769	1.00792	1.27814	1.19854	0.777636	1.85718	0.738434	0.897961	0.558499	1.13645	0.955045	0.818488	0.629012	0.654815	0.438436	1.41217	0.770348	0.461943	0.345022	0.718152	0.92199	0.9033	0.361575	0.259051	0.790463	0.571067	0.605189	0.717509	0.676029	0.348077	1.09121	0.466672	0.759482	1.06866	0.809362	1.07096	0.447375	0.603744	1.39356	0.496412	0.825947	1.10838	0.558696	1.10744	0.485172	0.61545	0.84293
		484.133	0.267984	1.00623	1.29636	1.15816	0.790276	1.91077	0.757826	0.899988	0.557403	1.15972	0.970203	0.827531	0.642296	0.686704	0.380722	1.44291	0.800593	0.430732	0.301877	0.773799	0.923434	0.859762	0.362128	0.298827	0.759175	0.538995	0.626757	0.700125	0.707365	0.404416	1.1066	0.45568	0.782217	1.05224	0.781284	1.03582	0.465582	0.588684	1.45192	0.52551	0.802908	1.3791	0.577901	1.10465	0.493168	0.629282	0.787051
		484.524	0.253378	1.03753	1.25893	1.13989	0.802491	1.92612	0.727554	0.936523	0.545372	1.15323	0.927726	0.847862	0.639156	0.66743	0.378858	1.46322	0.808433	0.431183	0.31295	0.703859	0.930751	0.881903	0.370898	0.281208	0.771578	0.579073	0.614011	0.66617	0.691577	0.372422	1.13631	0.435697	0.765861	1.09308	0.831278	1.03317	0.449633	0.595712	1.49092	0.515629	0.837917	1.18577	0.562351	1.10847	0.494192	0.639726	0.815796
		484.916	0.308559	0.993429	1.24753	1.18793	0.800507	1.91184	0.787782	0.926824	0.529745	1.17826	0.973358	0.821785	0.646445	0.648559	0.404655	1.4299	0.82228	0.428014	0.300634	0.708178	0.957291	0.822495	0.359959	0.259774	0.784612	0.51862	0.58943	0.683793	0.654936	0.359124	1.02598	0.403408	0.73929	1.08477	0.798725	1.04582	0.453424	0.560558	1.46109	0.475914	0.781683	1.21518	0.520378	1.15118	0.466945	0.607405	0.796637
		485.307	0.26284	0.990429	1.22622	1.22618	0.793832	1.95508	0.781101	0.950553	0.525664	1.14926	0.962885	0.820007	0.650989	0.694112	0.450074	1.36753	0.812101	0.436591	0.305967	0.724457	0.961574	0.82329	0.38096	0.314625	0.759537	0.511743	0.622511	0.622224	0.659616	0.323032	1.0593	0.432286	0.765622	1.09379	0.771602	0.968462	0.473058	0.542229	1.49966	0.50704	0.802664	1.14224	0.536651	1.19366	0.479387	0.611706	0.808857
		485.698	0.283798	1.0113	1.28134	1.14474	0.784102	1.88562	0.733797	0.913245	0.554219	1.17031	0.922901	0.837647	0.669956	0.687107	0.394901	1.4931	0.785905	0.45727	0.292535	0.731907	0.922168	0.904915	0.367373	0.266661	0.793621	0.528475	0.600264	0.684417	0.658756	0.315547	1.04244	0.410416	0.747475	1.09422	0.752454	1.06781	0.442563	0.597093	1.50507	0.478603	0.781531	1.18175	0.537894	1.11123	0.473714	0.643055	0.801322
		486.089	0.270994	1.02552	1.25284	1.14995	0.770552	1.81876	0.732555	0.909759	0.56794	1.11642	0.939524	0.828915	0.626087	0.673404	0.405764	1.46652	0.771101	0.430016	0.270583	0.708774	0.951366	0.843439	0.38607	0.258153	0.790943	0.521664	0.570142	0.707604	0.642809	0.327393	1.05493	0.421859	0.735408	1.06864	0.799884	1.0274	0.455006	0.565611	1.49529	0.514575	0.793098	1.10274	0.569219	1.14024	0.47646	0.600336	0.802023
		486.48	0.287228	1.01159	1.32156	1.16694	0.75307	1.88172	0.710623	0.889166	0.537893	1.11165	0.950906	0.854328	0.627137	0.677056	0.415769	1.43394	0.761658	0.429159	0.294814	0.721901	0.91696	0.927343	0.388372	0.245347	0.768369	0.524054	0.588992	0.67549	0.655011	0.317111	1.04115	0.421605	0.755492	1.06172	0.76885	1.03113	0.455063	0.668242	1.4709	0.484483	0.855441	1.07802	0.566982	1.10881	0.485532	0.583329	0.800876
		486.871	0.278659	0.975761	1.20117	1.15412	0.767089	1.88899	0.731419	0.909225	0.52945	1.20847	0.931777	0.815628	0.629223	0.659758	0.393638	1.42848	0.775649	0.419559	0.297755	0.72991	0.917329	0.847993	0.369654	0.275308	0.787595	0.571134	0.585477	0.668807	0.662392	0.339364	1.04038	0.413211	0.769467	1.0535	0.792227	1.06806	0.450346	0.616421	1.40819	0.505546	0.772596	1.02959	0.554294	1.09357	0.474163	0.637262	0.794715
		487.262	0.26947	0.976211	1.25431	1.16148	0.771938	1.86317	0.746395	0.905498	0.541947	1.13435	0.919718	0.803267	0.606063	0.661736	0.39286	1.4926	0.815117	0.428351	0.323588	0.739984	0.96241	0.823411	0.370262	0.25203	0.793856	0.559381	0.565705	0.695658	0.670028	0.384573	1.01147	0.411834	0.757568	1.07614	0.801174	1.0205	0.43808	0.562948	1.35583	0.506606	0.81176	1.04947	0.568746	1.11325	0.516003	0.608829	0.835299
		487.653	0.266555	1.08052	1.23502	1.22996	0.753966	1.87442	0.760757	0.920514	0.550084	1.15901	0.903632	0.826919	0.635561	0.644132	0.384408	1.50022	0.797302	0.405567	0.298957	0.738451	0.945781	0.861512	0.360108	0.231685	0.786362	0.506317	0.565691	0.668647	0.653495	0.329524	1.0175	0.380488	0.747978	1.05003	0.810206	0.971993	0.434062	0.640352	1.37016	0.47902	0.719529	1.35976	0.537913	1.08682	0.477478	0.631571	0.784567
		488.044	0.272381	0.983156	1.21738	1.08283	0.761258	1.88933	0.729167	0.898593	0.531286	1.13205	0.922774	0.804986	0.615029	0.62742	0.372848	1.44672	0.771999	0.415621	0.310848	0.704596	0.931194	0.827889	0.360108	0.263815	0.768525	0.533432	0.579959	0.685522	0.639837	0.339667	1.00933	0.387311	0.729517	1.03585	0.783356	1.0367	0.437117	0.549829	1.2864	0.473877	0.765137	1.21268	0.567282	1.10012	0.479819	0.590424	0.763288
		488.435	0.284756	0.98477	1.17413	1.16824	0.736708	1.82205	0.739919	0.889401	0.533793	1.14907	0.931153	0.850272	0.596598	0.665116	0.392252	1.43172	0.748746	0.412552	0.319796	0.740954	0.982657	0.80627	0.352227	0.264708	0.771723	0.544976	0.57676	0.689787	0.662939	0.354065	1.07904	0.378914	0.717736	1.08874	0.766797	0.991065	0.46285	0.506903	1.30886	0.4808	0.720672	1.14181	0.552743	1.05749	0.461658	0.62989	0.7744
		488.826	0.293929	1.01679	1.2028	1.11903	0.770482	1.83103	0.717659	0.919339	0.508489	1.13078	0.91629	0.811762	0.626377	0.656078	0.372598	1.42204	0.850664	0.411484	0.290208	0.732783	0.963229	0.833226	0.364063	0.261344	0.790679	0.525189	0.588975	0.666993	0.651578	0.31423	1.02182	0.38024	0.784191	1.03103	0.753484	1.0296	0.475571	0.560494	1.29695	0.496749	0.755176	1.16971	0.548583	1.06978	0.494786	0.611887	0.779519
		489.217	0.260969	1.01797	1.22515	1.07039	0.764375	1.818	0.735617	0.902093	0.537449	1.14993	0.903435	0.81215	0.61015	0.638093	0.371432	1.33067	0.774445	0.412658	0.264742	0.70557	0.881269	0.852768	0.34748	0.267736	0.763644	0.527253	0.551127	0.684962	0.674497	0.318592	1.0719	0.374811	0.720707	1.02381	0.740384	1.0742	0.430269	0.569629	1.26299	0.472374	0.812719	1.19222	0.536535	1.13239	0.456164	0.631152	0.780998
		489.608	0.289069	0.958983	1.20446	1.06159	0.782424	1.7902	0.75271	0.846647	0.50143	1.10005	0.93403	0.819829	0.590639	0.651924	0.372558	1.45963	0.850991	0.400559	0.281745	0.710457	0.958174	0.885713	0.344343	0.250116	0.76453	0.567637	0.560381	0.650625	0.666262	0.345204	1.01088	0.365578	0.685283	1.00855	0.760454	1.02741	0.426498	0.591602	1.27571	0.490442	0.75249	1.10809	0.534241	1.08373	0.486004	0.635934	0.788508
		490	0.265187	0.9685	1.20119	1.08316	0.755245	1.85604	0.750484	0.884626	0.498713	1.1213	0.871575	0.828941	0.619785	0.625281	0.38359	1.38006	0.788419	0.449496	0.294137	0.739572	0.890978	0.856623	0.367991	0.266747	0.771481	0.501089	0.546209	0.638891	0.651961	0.355482	0.986674	0.411787	0.728154	0.994593	0.764814	1.05676	0.430137	0.619446	1.21561	0.49023	0.728804	1.102	0.553713	1.04591	0.478802	0.663815	0.759809
		490.391	0.250568	1.00177	1.19415	1.13607	0.743903	1.77905	0.746772	0.849623	0.506105	1.17834	0.878652	0.782874	0.590579	0.610625	0.359199	1.43906	0.834909	0.411726	0.295961	0.721962	0.893724	0.823954	0.354357	0.240481	0.758993	0.511486	0.547804	0.654496	0.665079	0.338685	0.992601	0.366469	0.716738	0.984624	0.756884	1.02945	0.393458	0.538821	1.23754	0.481214	0.729467	1.13902	0.562552	1.05422	0.439662	0.605933	0.733087
		490.782	0.289778	0.914395	1.1906	1.14343	0.764534	1.83697	0.725845	0.803637	0.516299	1.08131	0.89208	0.819182	0.623397	0.63008	0.371202	1.46552	0.773372	0.411783	0.293822	0.686031	0.883325	0.802884	0.34321	0.263669	0.743842	0.532418	0.577787	0.633028	0.614414	0.331679	0.999676	0.35934	0.733971	0.988892	0.764781	0.991431	0.431564	0.502222	1.2655	0.485354	0.757047	1.05033	0.5543	1.02898	0.495694	0.61721	0.746957
		491.173	0.244217	0.962584	1.21122	1.11121	0.758288	1.81848	0.696477	0.837524	0.497476	1.17064	0.886146	0.788932	0.613946	0.640029	0.382018	1.29325	0.764043	0.414546	0.296245	0.678685	0.899769	0.837914	0.351495	0.261766	0.766793	0.520737	0.559414	0.612909	0.60695	0.354491	1.04364	0.41733	0.701648	1.00212	0.72555	1.03025	0.398453	0.533888	1.24158	0.46871	0.74202	1.07858	0.551649	1.08374	0.467663	0.61678	0.728072
		491.564	0.258234	0.932772	1.19165	1.11048	0.712631	1.78214	0.748479	0.764088	0.475223	1.10832	0.870682	0.804515	0.585647	0.60948	0.36363	1.34354	0.796844	0.405894	0.280062	0.678119	0.88614	0.779186	0.33837	0.227518	0.737461	0.522081	0.586645	0.590404	0.645749	0.321078	1.0042	0.376003	0.715717	0.988421	0.74633	1.02735	0.395343	0.590728	1.25966	0.460595	0.767505	1.0918	0.505985	1.04822	0.484083	0.602338	0.759857
		491.955	0.258789	0.916859	1.17358	1.05386	0.726007	1.78286	0.701097	0.780055	0.492209	1.0833	0.902055	0.806833	0.613578	0.603813	0.378241	1.38844	0.777019	0.434497	0.360097	0.693149	0.896225	0.795408	0.337723	0.233667	0.763327	0.517769	0.568371	0.602788	0.620853	0.31781	0.920747	0.366498	0.72877	0.968126	0.716918	0.966908	0.413525	0.54131	1.35332	0.453713	0.777292	1.09849	0.535072	1.02124	0.464772	0.600568	0.75767
		492.346	0.251461	0.96108	1.14002	1.106	0.728496	1.75838	0.691328	0.785042	0.524514	1.059	0.906656	0.8196	0.569515	0.628158	0.367598	1.43272	0.744391	0.40835	0.275946	0.691456	0.852264	0.833769	0.338822	0.235762	0.759155	0.521691	0.542754	0.611807	0.602783	0.354447	0.939407	0.368579	0.692687	0.985615	0.717538	0.982835	0.421503	0.557667	1.25322	0.470894	0.755382	1.04899	0.528643	1.07415	0.469135	0.633918	0.708864
		492.737	0.273745	0.948618	1.16688	1.05373	0.733513	1.75538	0.711323	0.765436	0.49213	1.11233	0.89529	0.814512	0.585199	0.61064	0.352343	1.45051	0.767963	0.401367	0.30284	0.699527	0.861299	0.791763	0.343802	0.250945	0.745578	0.528935	0.56517	0.602447	0.597498	0.342772	0.909214	0.400011	0.722068	0.957965	0.734166	0.921722	0.41531	0.546475	1.35042	0.479605	0.706391	0.961321	0.593768	1.05384	0.442656	0.56396	0.74966
		493.128	0.245748	0.918967	1.16384	1.01081	0.709864	1.66725	0.711265	0.747773	0.489994	1.06428	0.833596	0.797815	0.605725	0.603068	0.379063	1.28389	0.796969	0.399077	0.311729	0.673232	0.815913	0.912949	0.339546	0.272402	0.728673	0.496656	0.49879	0.623967	0.606164	0.335707	0.951068	0.382569	0.719448	0.96173	0.736465	0.952709	0.414932	0.499418	1.37157	0.472263	0.729607	1.0486	0.532258	1.07947	0.475708	0.624655	0.74405
		493.519	0.253331	0.890215	1.14255	1.00697	0.687931	1.68183	0.695403	0.722131	0.475947	1.09368	0.829719	0.801596	0.572911	0.600122	0.34868	1.30954	0.768612	0.392882	0.28366	0.686837	0.795775	0.799732	0.283532	0.256035	0.735888	0.494693	0.538033	0.628813	0.597997	0.303008	0.962506	0.369744	0.715751	0.951941	0.730736	0.952851	0.376817	0.556479	1.34452	0.471244	0.681516	1.04831	0.555206	1.01497	0.454251	0.579223	0.7306
		493.91	0.220143	0.885695	1.0962	1.07209	0.707938	1.72939	0.706194	0.746696	0.4811	1.05652	0.843978	0.791604	0.597807	0.582492	0.350215	1.40357	0.748702	0.406233	0.300822	0.687643	0.85775	0.843065	0.326257	0.265305	0.735721	0.507251	0.553248	0.624141	0.611331	0.342948	0.91855	0.367234	0.674874	0.945348	0.676025	0.899754	0.387913	0.517124	1.32659	0.431012	0.694823	1.03801	0.541934	1.03121	0.428661	0.584778	0.69866
		494.301	0.244179	0.88134	1.09373	1.08046	0.717256	1.67989	0.718595	0.746956	0.475532	1.09641	0.867136	0.774618	0.541891	0.60755	0.32629	1.36937	0.77165	0.402396	0.285788	0.695485	0.82875	0.764172	0.334822	0.240267	0.720042	0.482928	0.539906	0.575899	0.611645	0.327464	1.00869	0.373655	0.692834	0.94397	0.669895	0.942959	0.40534	0.542133	1.29239	0.465429	0.756818	0.931442	0.525747	1.07083	0.4659	0.614825	0.686415
		494.693	0.223002	0.906653	1.1188	1.05491	0.708959	1.70089	0.692733	0.850845	0.469163	1.06205	0.817865	0.754043	0.560939	0.566326	0.352533	1.2046	0.748537	0.387608	0.278069	0.692759	0.828573	0.815076	0.334765	0.260131	0.716319	0.520794	0.519762	0.62278	0.585832	0.325301	0.964931	0.347393	0.660726	0.947445	0.721703	0.902512	0.377342	0.558414	1.33431	0.471962	0.698258	1.03853	0.569843	1.03264	0.447721	0.600899	0.713023
		495.084	0.226286	0.916411	1.11272	1.028	0.686487	1.68704	0.691603	0.780348	0.483609	1.03092	0.866467	0.772153	0.543549	0.582696	0.345054	1.38795	0.704991	0.370955	0.25234	0.665632	0.837165	0.766924	0.328174	0.241679	0.724387	0.488805	0.532692	0.630681	0.596804	0.313374	0.937941	0.340961	0.659311	0.889123	0.660054	1.02502	0.393426	0.547269	1.32479	0.441766	0.685283	1.08356	0.522966	0.948209	0.464506	0.580394	0.748763
		495.475	0.284606	0.868775	1.11179	1.02556	0.665342	1.77699	0.700514	0.845087	0.457937	1.06017	0.864915	0.79455	0.571347	0.584078	0.360156	1.28812	0.71289	0.386352	0.245752	0.659142	0.84809	0.697536	0.319001	0.209598	0.741245	0.505429	0.532157	0.627609	0.576105	0.315024	0.920501	0.360679	0.633779	0.920632	0.656823	0.956276	0.420986	0.583995	1.30919	0.430246	0.645472	0.999298	0.522332	0.998576	0.442783	0.601793	0.678186
		495.866	0.27244	0.85979	1.13836	0.984481	0.667411	1.63019	0.68412	0.810492	0.460609	1.03567	0.842407	0.770968	0.569006	0.628506	0.363563	1.4098	0.757375	0.397748	0.268439	0.700805	0.818594	0.778507	0.308241	0.235702	0.723852	0.460356	0.53457	0.615797	0.582008	0.294608	0.916626	0.369207	0.654666	0.909666	0.694791	0.952449	0.384365	0.514354	1.27059	0.41909	0.691649	0.952151	0.495749	1.0326	0.447464	0.595438	0.710509
		496.257	0.205217	0.848124	1.06857	0.95061	0.659607	1.59724	0.671512	0.820298	0.405577	1.05	0.826525	0.761426	0.544943	0.574062	0.36333	1.34222	0.721475	0.371648	0.270289	0.628732	0.740268	0.758164	0.309462	0.209436	0.728092	0.491035	0.481436	0.60719	0.61365	0.301022	0.906908	0.324412	0.655055	0.891567	0.655271	0.857804	0.388291	0.502185	1.24955	0.422053	0.693238	0.959748	0.511351	1.00569	0.434694	0.5553	0.690197
		496.648	0.232107	0.891937	1.08699	1.05715	0.689036	1.5882	0.691435	0.845746	0.428649	1.10474	0.802538	0.773079	0.551896	0.55141	0.347502	1.36196	0.712543	0.375663	0.28354	0.62507	0.764733	0.76024	0.300098	0.252864	0.706879	0.449242	0.506513	0.630317	0.561487	0.336665	0.859391	0.333358	0.624875	0.912467	0.673353	0.971131	0.386026	0.482119	1.22622	0.427582	0.688474	0.971265	0.501681	1.00616	0.468009	0.54461	0.669624
		497.039	0.2459	0.889798	1.08637	0.992454	0.690692	1.63128	0.683506	0.784637	0.472784	1.05981	0.831272	0.752048	0.570735	0.553262	0.303181	1.27634	0.753022	0.36137	0.300929	0.691463	0.759569	0.747419	0.308124	0.207502	0.70958	0.512583	0.470786	0.655269	0.568099	0.283964	0.854003	0.314939	0.677075	0.919512	0.669637	0.871303	0.35555	0.504949	1.2496	0.438637	0.636289	1.06931	0.529099	0.956481	0.41146	0.590546	0.677967
		497.43	0.265825	0.874594	1.08993	1.03604	0.68097	1.67529	0.671634	0.791952	0.436665	1.01931	0.842696	0.753394	0.53019	0.556543	0.367509	1.39697	0.659034	0.368991	0.280225	0.659872	0.809843	0.732382	0.319686	0.248252	0.692602	0.470705	0.49434	0.623675	0.571388	0.293346	0.900285	0.35342	0.659872	0.892888	0.686547	0.900974	0.404611	0.553852	1.25312	0.413071	0.678306	1.02364	0.528479	0.954349	0.442984	0.575271	0.677799
		497.821	0.254039	0.881867	1.08387	1.00502	0.660051	1.66974	0.636433	0.78881	0.410527	0.997053	0.796114	0.743088	0.566653	0.554034	0.36149	1.3551	0.723621	0.365341	0.311911	0.678115	0.77358	0.732176	0.3037	0.25344	0.688246	0.459572	0.503889	0.619761	0.570047	0.311612	0.881981	0.337698	0.609267	0.861535	0.671406	0.893347	0.407108	0.502403	1.23264	0.432247	0.665218	0.933786	0.502993	0.946219	0.452237	0.588872	0.669078
		498.212	0.24231	0.830637	1.07842	0.996343	0.659001	1.64953	0.665709	0.830094	0.478662	1.07037	0.809373	0.748663	0.541128	0.565499	0.340361	1.30425	0.727262	0.357878	0.292814	0.62431	0.759657	0.743588	0.320102	0.241677	0.681361	0.462794	0.505825	0.650379	0.567519	0.301161	0.850523	0.333108	0.651043	0.878984	0.666905	0.898363	0.377269	0.50118	1.24492	0.430582	0.716491	1.03107	0.486	0.953006	0.441601	0.610786	0.662016
		498.603	0.229232	0.815648	1.06737	0.955927	0.670238	1.55971	0.675656	0.844869	0.394413	1.01314	0.799867	0.764927	0.528853	0.575669	0.3744	1.35807	0.742193	0.393923	0.285158	0.647497	0.754154	0.727394	0.315532	0.218566	0.679125	0.477323	0.538379	0.59983	0.548037	0.291067	0.957776	0.334501	0.631674	0.835226	0.644072	0.867347	0.380143	0.492555	1.23088	0.413212	0.69713	1.0195	0.464884	0.945187	0.464563	0.599178	0.62248
		498.994	0.225872	0.87622	1.06284	1.00173	0.674129	1.60798	0.677738	0.819637	0.465476	1.0692	0.789441	0.753683	0.550823	0.564938	0.338955	1.33767	0.714092	0.370229	0.26439	0.608959	0.763913	0.728887	0.333301	0.257215	0.698545	0.421651	0.513677	0.621594	0.560982	0.301963	0.924056	0.337644	0.627176	0.884018	0.630778	0.953025	0.389411	0.471155	1.31185	0.420959	0.669693	0.944096	0.537029	0.953582	0.410361	0.580406	0.641568
		499.385	0.257453	0.890087	1.03786	0.936066	0.624531	1.58524	0.674252	0.80015	0.444537	1.07131	0.798119	0.755153	0.537375	0.556407	0.320493	1.30379	0.712738	0.381867	0.286035	0.635168	0.752234	0.768284	0.306586	0.255258	0.696921	0.453359	0.508928	0.602191	0.539897	0.298392	0.880093	0.331773	0.610156	0.854404	0.661611	0.941943	0.346521	0.516143	1.19472	0.411974	0.689948	0.977446	0.451711	0.940539	0.449285	0.580741	0.633776
		499.777	0.218983	0.837123	1.12806	0.965359	0.624635	1.59021	0.650399	0.808352	0.442912	0.999255	0.797197	0.723019	0.508672	0.516232	0.316902	1.2465	0.73759	0.398111	0.286098	0.661361	0.773377	0.731966	0.290742	0.214685	0.701719	0.45188	0.497924	0.608018	0.547375	0.271944	0.827983	0.339994	0.665874	0.818761	0.632555	0.88738	0.353019	0.436711	1.16906	0.404397	0.652314	0.890513	0.452395	0.919881	0.424758	0.561014	0.67774
		500.168	0.241461	0.805667	1.07781	0.997179	0.620768	1.53616	0.683686	0.814361	0.445527	0.992751	0.816732	0.739264	0.517069	0.530345	0.31254	1.23899	0.669853	0.380058	0.264862	0.642752	0.79298	0.713838	0.289535	0.226499	0.682836	0.451787	0.50302	0.590191	0.552945	0.290163	0.795789	0.320833	0.598406	0.834044	0.644968	0.860762	0.349765	0.510078	1.18845	0.408632	0.658772	0.903366	0.476759	0.924489	0.423147	0.5251	0.629175
		500.559	0.238307	0.812851	1.04265	0.966082	0.657723	1.51732	0.66794	0.823086	0.412909	1.00699	0.766023	0.722086	0.504401	0.501542	0.326881	1.24751	0.702228	0.370375	0.280612	0.585933	0.718211	0.69559	0.300702	0.236306	0.699098	0.409763	0.52908	0.607663	0.557176	0.275241	0.83117	0.307962	0.600034	0.860056	0.652533	0.86166	0.360697	0.428606	1.17826	0.425827	0.651311	0.962562	0.480805	0.887638	0.420514	0.545894	0.707076
		500.95	0.20701	0.787731	1.02057	0.972477	0.640602	1.5234	0.699558	0.792288	0.422394	0.965105	0.768507	0.706487	0.497141	0.535435	0.349677	1.26272	0.720964	0.365949	0.236224	0.594753	0.720013	0.700692	0.286953	0.269967	0.681922	0.451974	0.48419	0.56013	0.53856	0.282284	0.868343	0.311916	0.591861	0.840288	0.65118	0.88323	0.361532	0.423085	1.17233	0.400275	0.626858	0.969976	0.490643	0.865956	0.428599	0.544371	0.656013
		501.341	0.253797	0.821967	1.03205	0.953456	0.625904	1.51802	0.651032	0.811456	0.44758	1.00863	0.779478	0.696774	0.503768	0.512768	0.32738	1.29603	0.689462	0.366901	0.26279	0.623107	0.754841	0.764946	0.288577	0.22922	0.687418	0.425368	0.476792	0.591021	0.539865	0.29968	0.820648	0.302745	0.62869	0.830176	0.629069	0.867092	0.340725	0.484328	1.18883	0.404109	0.620162	0.847752	0.470637	0.898045	0.405345	0.539962	0.641779
		501.732	0.242226	0.790528	0.988317	0.92512	0.6551	1.55719	0.652085	0.864184	0.406412	1.03549	0.784778	0.76302	0.500887	0.513746	0.358128	1.10527	0.67723	0.368089	0.285507	0.601449	0.749025	0.721144	0.280733	0.241663	0.706733	0.391843	0.479574	0.60997	0.537311	0.284817	0.890469	0.309671	0.600678	0.820053	0.608988	0.88256	0.347332	0.413572	1.23589	0.396779	0.627017	0.884094	0.476978	0.900853	0.380564	0.553025	0.627141
		502.123	0.229159	0.831209	0.988862	0.886571	0.618115	1.48408	0.662314	0.799722	0.408241	1.05114	0.775082	0.699154	0.507856	0.56487	0.323736	1.28259	0.677251	0.375431	0.242397	0.636273	0.759498	0.755342	0.28125	0.224075	0.662181	0.414455	0.496406	0.586538	0.499703	0.285161	0.783352	0.299704	0.568898	0.804485	0.62936	0.815371	0.337041	0.477842	1.16879	0.36828	0.667666	0.83792	0.463189	0.920831	0.414783	0.567067	0.635414
		502.514	0.215011	0.810097	0.99092	0.957432	0.645615	1.49801	0.617889	0.807351	0.407764	1.01204	0.762546	0.704325	0.500174	0.531655	0.30251	1.26213	0.656214	0.365362	0.232635	0.626351	0.712849	0.755576	0.308732	0.242874	0.663888	0.43123	0.49195	0.584618	0.533114	0.289477	0.832977	0.299867	0.601846	0.771172	0.599806	0.856587	0.337522	0.482005	1.10293	0.397445	0.570796	0.93243	0.503902	0.879003	0.41417	0.542897	0.622683
		502.905	0.240386	0.771269	0.984718	1.01059	0.619063	1.47501	0.620215	0.782753	0.390793	0.978274	0.76112	0.726384	0.520931	0.523746	0.303543	1.23543	0.712976	0.349216	0.288714	0.616116	0.759954	0.67948	0.276616	0.298368	0.63804	0.405281	0.468877	0.592639	0.504785	0.260455	0.803156	0.310229	0.586881	0.788316	0.578653	0.850649	0.3695	0.543917	1.07664	0.399726	0.62618	0.866507	0.486337	0.858999	0.416945	0.568179	0.574019
		503.296	0.242227	0.77982	0.965199	0.867132	0.616929	1.39356	0.624417	0.782504	0.404916	0.96291	0.750188	0.699154	0.504373	0.526123	0.325223	1.18379	0.664843	0.344391	0.271212	0.616478	0.704593	0.656278	0.269133	0.239702	0.657615	0.446012	0.478651	0.588888	0.501106	0.27255	0.810163	0.289959	0.562213	0.814348	0.610728	0.849685	0.325735	0.447209	1.12543	0.390022	0.592663	0.88208	0.475333	0.913656	0.408978	0.550027	0.57783
		503.687	0.226369	0.769169	1.00708	0.851371	0.575789	1.3933	0.647828	0.781042	0.390863	0.966804	0.747292	0.700884	0.490406	0.51627	0.368962	1.23873	0.64204	0.360078	0.2546	0.664291	0.67959	0.680806	0.283382	0.242605	0.644483	0.411564	0.430018	0.626694	0.485671	0.269618	0.829468	0.312114	0.61132	0.748967	0.617398	0.749917	0.343044	0.462969	1.1079	0.37068	0.605068	0.851393	0.440797	0.866795	0.429875	0.545767	0.620688
		504.078	0.249563	0.784142	0.974175	0.896503	0.599884	1.41011	0.625761	0.786618	0.388399	0.999515	0.735632	0.690672	0.480902	0.492803	0.309078	1.33489	0.641875	0.334852	0.251372	0.589772	0.688401	0.663921	0.281876	0.247936	0.652523	0.465006	0.457327	0.572656	0.49474	0.296905	0.838401	0.319104	0.571132	0.812006	0.611164	0.809785	0.324731	0.494004	1.04821	0.373437	0.631938	0.867501	0.468713	0.912707	0.392661	0.534382	0.622634
		504.47	0.205403	0.747567	0.977716	0.873129	0.600444	1.35606	0.63157	0.718181	0.365312	0.959762	0.742365	0.671458	0.485394	0.489886	0.322024	1.20314	0.623788	0.344681	0.238146	0.566292	0.681349	0.626128	0.275734	0.220016	0.657903	0.437795	0.475636	0.604098	0.511546	0.269172	0.795625	0.291574	0.552157	0.759241	0.542367	0.795885	0.321236	0.433802	1.13577	0.363163	0.571393	0.770087	0.45966	0.878515	0.410592	0.530575	0.558784
		504.861	0.206122	0.75045	1.01173	0.860471	0.619148	1.47074	0.631364	0.744401	0.390018	0.969613	0.720931	0.703067	0.489846	0.485089	0.290523	1.19951	0.642155	0.385018	0.242263	0.592899	0.719437	0.701742	0.29001	0.247336	0.654403	0.406128	0.472508	0.592319	0.522619	0.307707	0.889298	0.302764	0.537065	0.735669	0.602921	0.807411	0.318262	0.414215	1.09965	0.380149	0.638813	0.864224	0.459481	0.826666	0.413413	0.532167	0.569148
		505.252	0.236038	0.786442	0.94762	0.91292	0.605293	1.40093	0.621716	0.774411	0.345215	0.99583	0.7154	0.688275	0.466454	0.495142	0.322993	1.09801	0.657956	0.340005	0.274475	0.582294	0.695965	0.682868	0.291749	0.228604	0.671787	0.428609	0.476754	0.5902	0.481959	0.289813	0.837413	0.298273	0.581081	0.748611	0.581413	0.828571	0.355625	0.395787	1.07454	0.391326	0.582755	0.83683	0.478399	0.852594	0.408875	0.542983	0.613271
		505.643	0.20729	0.778744	0.947334	0.90648	0.569572	1.3453	0.590016	0.776051	0.383833	0.908712	0.723811	0.687617	0.488662	0.475765	0.291175	1.3	0.668718	0.332803	0.253078	0.567385	0.684999	0.619645	0.268796	0.231361	0.6203	0.399658	0.448928	0.594082	0.500154	0.273552	0.801742	0.306449	0.514774	0.724658	0.593213	0.841387	0.310944	0.427586	1.10459	0.3644	0.56879	0.87368	0.440233	0.828746	0.415704	0.500912	0.570503
		506.034	0.219583	0.732421	0.974499	0.851951	0.584431	1.40326	0.652174	0.713478	0.385501	0.994532	0.732299	0.680818	0.472569	0.507793	0.293637	1.25524	0.613127	0.331869	0.267336	0.587994	0.703042	0.600494	0.270947	0.250937	0.644718	0.399571	0.444711	0.602597	0.496593	0.268341	0.784793	0.291271	0.547953	0.749788	0.579334	0.790484	0.33491	0.353997	1.05094	0.36041	0.588185	0.806609	0.443935	0.864222	0.379403	0.533955	0.557982
		506.425	0.206764	0.772061	0.934494	0.867527	0.599912	1.42237	0.584827	0.747209	0.37716	0.959074	0.723091	0.69707	0.528113	0.480642	0.313895	1.22333	0.635986	0.320627	0.265974	0.585455	0.634009	0.658993	0.279971	0.256082	0.649263	0.398889	0.448715	0.571077	0.474148	0.268686	0.823829	0.288404	0.537721	0.739197	0.560965	0.773964	0.334942	0.429727	1.00977	0.348319	0.59964	0.821199	0.468153	0.865259	0.400154	0.526352	0.5633
		506.816	0.185001	0.711473	0.929165	0.863817	0.610663	1.38011	0.604253	0.737202	0.356008	0.934887	0.728408	0.664	0.475546	0.498546	0.290241	1.18868	0.632863	0.347831	0.270826	0.56554	0.61652	0.621801	0.281566	0.21257	0.632318	0.396111	0.428912	0.584171	0.466038	0.266572	0.772971	0.284442	0.526768	0.758278	0.560076	0.74123	0.31632	0.388888	1.03928	0.354488	0.556409	0.818157	0.423489	0.867923	0.382899	0.525033	0.559637
		507.207	0.193237	0.733185	0.918221	0.901138	0.59972	1.39268	0.59809	0.760418	0.373659	0.969062	0.698694	0.703531	0.470351	0.472594	0.270759	1.21494	0.641137	0.344974	0.216415	0.578489	0.675473	0.628711	0.277656	0.238892	0.639333	0.375029	0.44458	0.540258	0.493867	0.248465	0.776631	0.305976	0.525192	0.722371	0.575659	0.735591	0.318377	0.397797	1.08723	0.350418	0.573708	0.732115	0.427131	0.835609	0.389317	0.517358	0.588363
		507.598	0.179749	0.770148	0.884187	0.852874	0.558864	1.37825	0.573416	0.688037	0.369886	0.94876	0.715198	0.62435	0.464163	0.48083	0.28073	1.17708	0.643	0.307261	0.23536	0.562702	0.662892	0.697586	0.274743	0.212911	0.61024	0.366288	0.432254	0.540723	0.490308	0.255334	0.806377	0.295684	0.495075	0.718741	0.560678	0.789476	0.312772	0.397453	1.02344	0.352926	0.608566	0.960864	0.445458	0.870597	0.390191	0.54071	0.604691
		507.989	0.200935	0.702488	0.924585	0.797183	0.585225	1.34236	0.60762	0.701351	0.375319	0.913111	0.689239	0.656367	0.470191	0.454565	0.277337	1.21282	0.651501	0.321063	0.217011	0.56244	0.633657	0.587473	0.277089	0.242531	0.623449	0.401355	0.425593	0.533126	0.470568	0.263542	0.790401	0.289202	0.52444	0.754673	0.537755	0.749706	0.322013	0.416838	1.04881	0.365478	0.558895	0.784798	0.452379	0.836418	0.342749	0.511511	0.600463
		508.38	0.220643	0.718941	0.869223	0.889776	0.570113	1.32368	0.599974	0.715501	0.345111	0.95693	0.665725	0.665054	0.436202	0.445539	0.285828	1.18233	0.612942	0.335436	0.229219	0.57591	0.627801	0.651299	0.272979	0.22433	0.614127	0.387044	0.430866	0.566837	0.458474	0.285816	0.793312	0.284251	0.518227	0.703267	0.572559	0.723534	0.306722	0.360192	1.04982	0.354989	0.565359	0.726421	0.442513	0.809638	0.402977	0.48142	0.54197
		508.771	0.201083	0.731949	0.844939	0.825118	0.569115	1.32593	0.602539	0.666386	0.355087	0.970238	0.67817	0.64199	0.446264	0.490999	0.3087	1.06645	0.633578	0.301334	0.207028	0.551214	0.591817	0.625753	0.269411	0.235661	0.593712	0.391892	0.452574	0.545957	0.469577	0.275061	0.729636	0.26905	0.519209	0.691149	0.564212	0.72936	0.309092	0.4501	1.01846	0.362537	0.520169	0.863619	0.422216	0.780656	0.352775	0.508227	0.531888
		509.162	0.214037	0.742705	0.882789	0.886581	0.582393	1.353	0.600573	0.689312	0.353669	0.903716	0.668556	0.639058	0.464851	0.457282	0.25754	1.22553	0.582651	0.311271	0.24341	0.580008	0.61151	0.630439	0.263275	0.230889	0.58358	0.400232	0.43151	0.53114	0.428908	0.266391	0.777527	0.264841	0.5262	0.728409	0.555087	0.735171	0.301999	0.372915	1.04325	0.34055	0.535137	0.876182	0.412361	0.753209	0.381371	0.528842	0.51999
		509.554	0.204769	0.741947	0.857679	0.835693	0.531285	1.33233	0.59773	0.676405	0.307974	0.925901	0.689147	0.659347	0.433214	0.459037	0.278677	1.08436	0.560398	0.331286	0.25466	0.562735	0.607454	0.601442	0.271673	0.170365	0.583765	0.394302	0.43629	0.536242	0.442814	0.278118	0.747792	0.255581	0.517244	0.690068	0.53742	0.708518	0.308029	0.406864	0.957744	0.342812	0.532113	0.884665	0.451829	0.75709	0.369979	0.510411	0.544094
		509.945	0.194781	0.739982	0.887928	0.807144	0.544011	1.27637	0.578118	0.713872	0.341366	0.92588	0.686006	0.617239	0.447648	0.436049	0.274307	1.11402	0.584653	0.331032	0.23835	0.547992	0.609051	0.620574	0.264734	0.213045	0.584527	0.419099	0.410172	0.514537	0.477889	0.250625	0.760255	0.288062	0.495235	0.697904	0.523927	0.753605	0.306001	0.363662	1.00092	0.33732	0.541083	0.707361	0.417156	0.77289	0.349014	0.512607	0.5308
		510.336	0.223943	0.725399	0.85704	0.796767	0.543919	1.29085	0.598969	0.656668	0.36091	0.877856	0.671996	0.639271	0.445482	0.462508	0.292121	1.10351	0.585227	0.316501	0.24004	0.528544	0.617121	0.592622	0.267647	0.200501	0.579493	0.333559	0.436606	0.525159	0.451773	0.253073	0.807355	0.275821	0.491487	0.671508	0.546544	0.700816	0.297553	0.350911	0.981668	0.343597	0.552128	0.803918	0.429124	0.77418	0.38314	0.497539	0.506143
		510.727	0.182715	0.679585	0.858673	0.876835	0.54128	1.34544	0.588705	0.651884	0.311049	0.896327	0.662659	0.62946	0.411556	0.444834	0.262861	1.15084	0.610372	0.309388	0.233719	0.527512	0.60089	0.573909	0.259813	0.205572	0.591795	0.359462	0.415748	0.535584	0.422963	0.247696	0.73504	0.256563	0.492854	0.674422	0.506423	0.631177	0.286337	0.38461	0.9931	0.341836	0.521384	0.702325	0.406315	0.752841	0.358644	0.490744	0.549349
		511.118	0.193629	0.691331	0.869593	0.797818	0.540078	1.21086	0.587874	0.644202	0.358056	0.810401	0.642298	0.60784	0.417491	0.426616	0.333527	1.08029	0.583542	0.306224	0.281092	0.560106	0.585119	0.581662	0.247443	0.187847	0.569557	0.39278	0.419251	0.527974	0.444236	0.26286	0.715002	0.25669	0.461451	0.687771	0.533769	0.641795	0.29961	0.363423	0.932321	0.321557	0.498372	0.810522	0.427842	0.7342	0.380568	0.482076	0.481631
		511.509	0.195283	0.652558	0.836965	0.813669	0.504268	1.25246	0.534931	0.623964	0.293925	0.900447	0.703499	0.606791	0.413577	0.431184	0.294729	1.06712	0.609605	0.314995	0.241541	0.499282	0.57887	0.599041	0.24349	0.232936	0.581756	0.392186	0.381614	0.509183	0.417407	0.240567	0.747394	0.249442	0.495015	0.666878	0.526225	0.678372	0.307143	0.352348	0.94276	0.296953	0.532818	0.746042	0.409139	0.767132	0.34913	0.495644	0.510687
		511.9	0.194693	0.717525	0.803963	0.838492	0.500176	1.22875	0.557749	0.649483	0.33964	0.85407	0.625841	0.594933	0.401369	0.423332	0.301287	1.08148	0.561823	0.307472	0.2384	0.531165	0.599749	0.560191	0.231619	0.234327	0.588981	0.386937	0.379703	0.524135	0.427266	0.232138	0.698486	0.2399	0.468217	0.647461	0.548807	0.655703	0.295331	0.385206	0.944601	0.32805	0.534491	0.830003	0.406629	0.774559	0.353841	0.501895	0.525261
		512.291	0.176211	0.663331	0.805864	0.771411	0.518399	1.2242	0.543778	0.656165	0.313729	0.812883	0.631086	0.596884	0.410901	0.411275	0.236643	1.07633	0.590557	0.318582	0.230447	0.51365	0.626511	0.599011	0.240453	0.203955	0.559605	0.326704	0.373708	0.529189	0.449862	0.220122	0.661788	0.247209	0.479513	0.645681	0.520347	0.631562	0.274513	0.407991	0.941433	0.33005	0.530649	0.753057	0.425162	0.715258	0.338783	0.451162	0.482379
		512.682	0.186586	0.639471	0.795297	0.76232	0.515072	1.22928	0.533585	0.658059	0.294835	0.835188	0.622877	0.619828	0.400592	0.426679	0.215636	1.01883	0.543785	0.295765	0.244051	0.508721	0.592641	0.56013	0.249427	0.220974	0.563412	0.367082	0.403848	0.473415	0.406212	0.249589	0.700279	0.243112	0.469604	0.609633	0.481444	0.628544	0.267971	0.32906	0.969944	0.306744	0.531019	0.738706	0.410869	0.716291	0.313948	0.471423	0.477324
		513.073	0.18357	0.660326	0.791149	0.750455	0.498968	1.14279	0.542579	0.625605	0.325215	0.854401	0.617519	0.594455	0.422574	0.390095	0.248894	1.06508	0.563632	0.293856	0.240497	0.457849	0.553344	0.556054	0.24248	0.205867	0.584449	0.350544	0.395105	0.514318	0.41184	0.231884	0.665033	0.24842	0.46415	0.647238	0.491155	0.659393	0.274738	0.372271	0.908783	0.312615	0.525025	0.734083	0.437077	0.714266	0.31648	0.490013	0.472192
		513.464	0.17758	0.613011	0.757628	0.731457	0.5386	1.18711	0.534787	0.673322	0.313898	0.857733	0.599203	0.613073	0.421667	0.415519	0.262606	1.06522	0.575999	0.307695	0.262013	0.489195	0.563818	0.601019	0.23906	0.207802	0.54025	0.364159	0.388077	0.488941	0.405054	0.217421	0.662044	0.223019	0.456557	0.626388	0.482042	0.640997	0.271455	0.322087	0.839031	0.302029	0.47397	0.792018	0.401083	0.699316	0.351529	0.468516	0.490911
		513.855	0.199597	0.663389	0.761534	0.759546	0.477911	1.13029	0.501548	0.639334	0.327398	0.790591	0.609404	0.621599	0.403884	0.381189	0.234577	1.10234	0.563814	0.289875	0.224991	0.504459	0.56079	0.544437	0.239963	0.174459	0.54543	0.344846	0.386087	0.498901	0.410924	0.236172	0.640446	0.241609	0.434119	0.587845	0.494681	0.639231	0.261105	0.356559	0.917828	0.291589	0.537789	0.582921	0.408852	0.674512	0.330364	0.470394	0.438262
		514.247	0.164545	0.608509	0.761969	0.694006	0.498713	1.22208	0.533416	0.629446	0.304879	0.836286	0.607445	0.545168	0.393762	0.411609	0.260644	1.07766	0.573286	0.272947	0.217787	0.492597	0.550257	0.536896	0.221013	0.173986	0.560951	0.337593	0.372146	0.494456	0.391814	0.235597	0.655704	0.23718	0.437995	0.610824	0.481672	0.653616	0.295282	0.327531	0.862853	0.317194	0.463588	0.656413	0.377083	0.682719	0.332166	0.443713	0.464312
		514.638	0.173735	0.592308	0.756823	0.780229	0.477617	1.1592	0.55327	0.621063	0.321329	0.83641	0.620233	0.598934	0.412694	0.407824	0.251854	1.0858	0.538985	0.303732	0.236853	0.48355	0.532675	0.539974	0.226007	0.18172	0.533943	0.35403	0.365538	0.488194	0.392989	0.24709	0.652944	0.251153	0.421861	0.637082	0.506354	0.644457	0.267103	0.329137	0.863947	0.279599	0.432204	0.75321	0.428176	0.667171	0.338111	0.443766	0.493611
		515.029	0.194336	0.618878	0.748259	0.737554	0.491861	1.17292	0.534938	0.622843	0.298728	0.778723	0.581777	0.554299	0.406108	0.385641	0.219419	0.968264	0.566908	0.299645	0.210688	0.483871	0.537189	0.56353	0.214316	0.226504	0.539452	0.3196	0.35434	0.483701	0.384034	0.218424	0.666391	0.232408	0.435742	0.597657	0.460552	0.623533	0.265246	0.331509	0.85017	0.289462	0.474875	0.658883	0.405599	0.635879	0.339968	0.434653	0.466519
		515.42	0.166593	0.624037	0.748563	0.811778	0.47718	1.16738	0.539973	0.605255	0.31248	0.869647	0.596076	0.592691	0.385867	0.428737	0.246404	0.984881	0.561888	0.287817	0.229307	0.50489	0.542973	0.505953	0.21158	0.199664	0.531816	0.330156	0.366573	0.477346	0.388094	0.211565	0.651526	0.220555	0.410631	0.598938	0.482209	0.64999	0.274078	0.31953	0.837644	0.294868	0.482456	0.613644	0.366619	0.670143	0.317843	0.4522	0.497741
		515.811	0.201663	0.578969	0.7604	0.68314	0.468228	1.11774	0.523971	0.624745	0.287056	0.830341	0.605939	0.569082	0.389776	0.396651	0.242759	0.937151	0.506326	0.272562	0.202519	0.484761	0.539313	0.455118	0.217536	0.2434	0.533579	0.341268	0.358243	0.46251	0.376745	0.209075	0.620189	0.225553	0.433593	0.605787	0.481357	0.625705	0.26648	0.378094	0.82519	0.283564	0.437336	0.664867	0.361483	0.671021	0.310288	0.402474	0.496689
		516.202	0.16267	0.633165	0.737227	0.749946	0.467822	1.11037	0.515747	0.594293	0.293042	0.864622	0.561482	0.558545	0.350941	0.364911	0.270092	0.962391	0.544952	0.272355	0.221195	0.479236	0.550741	0.517334	0.213139	0.200304	0.525026	0.34107	0.373181	0.46569	0.375757	0.224297	0.597486	0.237485	0.41767	0.592367	0.439321	0.641791	0.257448	0.335372	0.879537	0.29465	0.434862	0.705129	0.406363	0.64378	0.291371	0.422124	0.460267
		516.593	0.188642	0.705397	0.725495	0.787522	0.485747	1.11967	0.523595	0.6019	0.307228	0.82722	0.5768	0.561253	0.389913	0.375665	0.22848	1.01425	0.531422	0.261361	0.224016	0.482364	0.557136	0.528788	0.2352	0.203595	0.513896	0.390847	0.366265	0.467285	0.375614	0.2157	0.633052	0.237751	0.44167	0.548154	0.468438	0.650394	0.250428	0.358263	0.82257	0.270438	0.464396	0.762694	0.386924	0.687081	0.316283	0.445966	0.433466
		516.984	0.167891	0.625591	0.728012	0.76413	0.480286	1.08602	0.509147	0.61449	0.304028	0.764689	0.554439	0.551546	0.360406	0.37567	0.240339	0.955568	0.517285	0.257031	0.180799	0.442837	0.51263	0.503026	0.221719	0.19038	0.524361	0.305582	0.366018	0.471406	0.362857	0.229902	0.629351	0.225763	0.419411	0.561455	0.462064	0.626265	0.244244	0.33865	0.803548	0.285779	0.459995	0.70875	0.342352	0.645398	0.343176	0.449274	0.435745
		517.375	0.159411	0.569878	0.713551	0.698314	0.493973	1.0649	0.50594	0.589741	0.291704	0.806667	0.57242	0.547466	0.365576	0.396874	0.246806	0.968849	0.500303	0.262993	0.20063	0.462146	0.535291	0.495	0.213358	0.200379	0.516005	0.296283	0.342739	0.496605	0.359157	0.212199	0.638177	0.226817	0.383685	0.556491	0.436646	0.650706	0.258487	0.326974	0.811443	0.276815	0.493195	0.669045	0.350076	0.639775	0.289087	0.440312	0.446356
		517.766	0.167986	0.563557	0.729134	0.694965	0.441626	1.10687	0.507127	0.591802	0.298684	0.751114	0.548755	0.535748	0.351126	0.406486	0.216447	0.933881	0.513846	0.274187	0.230408	0.4745	0.492654	0.503761	0.22141	0.216857	0.527316	0.295722	0.359149	0.44647	0.373607	0.20815	0.564826	0.22544	0.396609	0.565093	0.45558	0.562075	0.243123	0.312822	0.848336	0.260368	0.455025	0.637211	0.373844	0.644653	0.323191	0.423565	0.414272
		518.157	0.165341	0.590355	0.666073	0.680809	0.459772	1.01623	0.498564	0.563573	0.269287	0.817134	0.560066	0.521271	0.356466	0.348623	0.238681	0.998487	0.510844	0.278289	0.211332	0.424233	0.489849	0.495774	0.207326	0.174963	0.50542	0.287479	0.367917	0.417978	0.355722	0.195899	0.609899	0.219748	0.388915	0.561579	0.432041	0.575289	0.251473	0.305794	0.812936	0.267735	0.382241	0.71947	0.343026	0.651073	0.327647	0.40257	0.44502
		518.548	0.172619	0.584384	0.680133	0.631559	0.443525	1.02577	0.478892	0.601851	0.287519	0.760397	0.558337	0.554858	0.366993	0.380104	0.250766	1.00608	0.492874	0.26766	0.221113	0.484485	0.464125	0.478911	0.214889	0.174549	0.512003	0.287492	0.322036	0.439627	0.354941	0.208	0.60756	0.187779	0.392062	0.541825	0.453969	0.565496	0.238902	0.339404	0.73984	0.250677	0.407706	0.559818	0.355756	0.66087	0.319163	0.441593	0.447216
		518.939	0.150112	0.575342	0.660413	0.700954	0.458854	0.985631	0.502109	0.560066	0.267458	0.719979	0.536224	0.523696	0.330122	0.359728	0.223643	0.972907	0.444719	0.265227	0.217304	0.444741	0.500539	0.486952	0.218797	0.153396	0.492484	0.299961	0.336511	0.457938	0.356528	0.213371	0.625696	0.229075	0.392812	0.53567	0.418546	0.560457	0.234602	0.294859	0.76437	0.264285	0.398801	0.630629	0.334173	0.621859	0.290812	0.425501	0.412382
[truncated: 426 more rows]
[truncated: 56 more columns]

## Sheet: Figure 4C
Figure 4C
Anap's peak fluorescence normalized to mCherry fluorescence	Experiment	Hv1-A197Anap	Hv1-F150A-A197Anap
Note:	Cell_1	0.140665	0.296594
Experiments taken after 48h transfection	Cell_2	0.304841	0.989397
S.D.: Standard deviation	Cell_3	0.436543	1.28276
[truncated: 48 more rows]

## Sheet: Figure 4E
Figure 4E
[truncated: 27 more rows]
