# Supplementary material for: Activation-pathway transitions in human voltage-gated proton channels revealed by a non-canonical fluorescent amino acid
Source: eLife. 2023 Jan 25;12:e85836. doi: 10.7554/eLife.85836 (PMC9925047; doi:10.7554/eLife.85836)
Supplement: Figure 5—source data 1. [file elife-85836-fig5-data1.xlsx]

## Sheet: Figure 5D
Figure 5D		Hv1-L201Anap
F-V and G-V curves Hv1-L201Anap mutant		ΔpH=0	Normalized Conductance						Normalized Fluorescence Changes
Note:		Membrane potential (mV)	GNorm_exp_1	GNorm_exp_2	GNorm_exp_3	Average	S.D.	S.E.M.	FNorm_exp_1	FNorm_exp_2	FNorm_exp_3	Average	S.D.	S.E.M.
ΔpH=0 (5.5-5.5)		-60	0.00210046	-0.00068411	0.204101	0.0685058	0.0958871	0.0553604	-0.0120175	0.0211933	-0.0195748	-0.00346633	0.0177079	0.0102236
ΔpH=1 (7-6)		-40	-0.00957079	0.0016582	-0.00259368	-0.00350209	0.004629	0.00267255	0.0172996	-0.0514134	0.0338764	-7.9123e-05	0.0369243	0.0213182
ΔpH=2 (7.5-5.5)		-20	0.0193647	-0.000482476	0.0104113	0.0097645	0.00811547	0.00468547	0.0222951	0.0351932	0.00880349	0.0220973	0.0107745	0.00622063
Gnorm:Normalized Conductance		0							-0.0132402	0.00481767	0.255541	0.0823727	0.12267	0.0708235
FNorm: Normalized %ΔF/F0		20	0.0469165	0.0172005	-0.0129352	0.0170606	0.0244346	0.0141073	0.0242836	0.021034	0.169539	0.071619	0.0692528	0.0399831
SD: Standard deviation		40	0.105855	0.0931511	0.0208699	0.0732919	0.037429	0.0216096	0.012011	0.03775	0.28929	0.113017	0.125086	0.0722185
S.E.M.: Standard error		60	0.24225	0.29646	0.185082	0.241264	0.0454756	0.0262553	0.139188	0.194028	0.477651	0.270289	0.148326	0.0856363
		80	0.539418	0.578479	0.45544	0.524446	0.0513339	0.0296376	0.451851	0.343351	0.61357	0.469591	0.111027	0.0641017
		100	0.801455	0.758518	0.666388	0.74212	0.0563471	0.032532	0.701568	0.66741	0.731458	0.700146	0.0261669	0.0151075
		120	0.937622	0.937741	0.805853	0.893739	0.0621445	0.0358791	0.865668	0.82182	0.812865	0.833451	0.0230724	0.0133209
		140	0.982477	0.978172	0.924296	0.961648	0.0264704	0.0152827	0.91098	1	1	0.970327	0.0419644	0.0242281
		160	1	1	1	1	0	0	1	0.984374	0.986991	0.990455	0.00683333	0.00394522
		Hv1-L201Anap
		ΔpH=1	Normalized Conductance							Normalized Fluorescence changes
		Membrane potential (mV)	GNorm_exp_1	GNorm_exp_2	GNorm_exp_3	GNorm_exp_4	Average	S.D.	S.E.M.	FNorm_exp_1	FNorm_exp_2	FNorm_exp_3	FNorm_exp_4	Average	S.D.	S.E.M.
		-100		0.0246748	0.00238366	-0.00495971	0.00736625	0.0126008	0.00727508		-0.0350147	0.00144116	0.01642	-0.00571786	0.0215997	0.0124706
		-80	0.0103695	-0.0534932	-0.0093425	0.019439	-0.00825679	0.0281136	0.0140568	0.00776668	-0.0195065	-0.00274473	-0.00711391	-0.00539962	0.00977679	0.0048884
		-60								0.0102304	-0.0305661	-0.00261775	0.0131523	-0.0024503	0.0172827	0.00864135
		-40	-0.0112787	-0.0470062	0.0312511	0.0779564	0.0127307	0.0467503	0.0233751	0.138141	-0.00899259	-0.00137179	0.0295636	0.039335	0.0588444	0.0294222
		-20	0.460374	0.0875914	0.227122	0.183193	0.23957	0.1371	0.0685498	0.365449	0.149956	0.103034	0.23413	0.213142	0.0996921	0.0498461
		0	0.64894	0.337023	0.487868	0.337134	0.452741	0.128922	0.064461	0.591357	0.435522	0.193981	0.505804	0.431666	0.147907	0.0739537
		20	0.795598	0.537767	0.689556	0.4997	0.630655	0.118799	0.0593995	0.751905	0.617956	0.447949	0.648019	0.616457	0.109247	0.0546233
		40	0.898897	0.694798	0.923138	0.660489	0.794331	0.117629	0.0588143	0.896527	0.858539	0.661468	0.763163	0.794924	0.0910898	0.0455449
		60	0.959799	0.813181	1	0.791986	0.891241	0.0901023	0.0450512	1	0.881493	0.881241	0.928073	0.922702	0.0485309	0.0242655
		80	1	0.892827		0.891241	0.928023	0.0508996	0.0293869		0.85733	1	0.924533	0.927288	0.0582774	0.0336465
		100		0.946006		0.962062	0.954034	0.00802797	0.00567663		0.99043		1	0.995215	0.00478515	0.00338361
		120		0.974414		1	0.987207	0.0127931	0.00904611		1		0.96899	0.984495	0.015505	0.0109637
		140		1			1	0	0		0.96764			0.96764	0	0
		Hv1-L201Anap
		ΔpH=2	Normalized Conductance								Normalized Fluorescence
		Membrane potential (mV)	GNorm_exp_1	GNorm_exp_2	GNorm_exp_3	GNorm_exp_4	GNorm_exp_5	Average	S.D.	S.E.M.	FNorm_exp_1	FNorm_exp_2	FNorm_exp_3	FNorm_exp_4	FNorm_exp_5	Average	S.D.	S.E.M.
		-120	-0.0771972	-0.11682	-0.0263256	0.374459	-0.294459	-0.0280685	0.220584	0.098648	0.0363408	0.0159661	0.00293623	-0.0473906	0.0627803	0.0141265	0.041151	0.0184033
		-100	-0.0141584	0.010706	0.00241352	-0.0343403	0.0270047	-0.00167489	0.0210494	0.00941358	-0.0157034	-0.045654	0.00618639	0.0185449	0.00663742	-0.00599774	0.0253834	0.0113518
		-80	0.00338443	0.059829	0.0794669	0.0362277	0.0903469	0.053851	0.0312452	0.0139733	0.0196601	-0.000853349	0.0652273	0.0513869	0.00443803	0.0279718	0.0291121	0.0130193
		-60	0.117816	0.190279	0.242104	0.18045	0.237907	0.193711	0.0452609	0.0202413	0.118447	0.0563089	0.178731	0.203795	0.137309	0.138918	0.0570964	0.0255343
		-40	0.339957	0.457049	0.416213	0.395613	0.464429	0.414652	0.0452094	0.0202183	0.280856	0.219525	0.401466	0.38507	0.4486	0.347104	0.0940254	0.0420495
		-20	0.584458	0.65752	0.574893	0.592013	0.62734	0.607245	0.030755	0.0137541	0.388422	0.424981	0.577478	0.589817	0.661425	0.528425	0.116367	0.0520411
		0	0.775791	0.774002	0.721905	1	0.767573	0.807854	0.0980856	0.0438652	0.664614	0.529292	0.709339	0.817868	0.818667	0.707956	0.12056	0.0539161
		20	0.921867	0.8717	0.820834		0.902335	0.879184	0.0381397	0.0190698	0.791995	0.851314	0.890078	1	0.949795	0.896637	0.0814814	0.0364396
		40	1	0.944367	0.918702		1	0.965767	0.035415	0.0177075	1	0.899059	0.997908		1	0.974242	0.0501317	0.0250659
		60		1	1			1	0	0		1	1			1	0	0
