# Supplementary material for: Activation-pathway transitions in human voltage-gated proton channels revealed by a non-canonical fluorescent amino acid
Source: eLife. 2023 Jan 25;12:e85836. doi: 10.7554/eLife.85836 (PMC9925047; doi:10.7554/eLife.85836)
Supplement: Figure 6—source data 1. [file elife-85836-fig6-data1.xlsx]

## Sheet: Figure 6C
Figure 6C		Hv1-L201Anap
F-V and G-V curves Hv1-L201Anap mutant at ΔpH=0		5.5-5.5	Normalized Conductance						Normalized Fluorescence Changes
Note:		Membrane potential (mV)	GNorm_exp_1	GNorm_exp_2	GNorm_exp_3	Average	S.D.	S.E.M.	FNorm_exp_1	FNorm_exp_2	FNorm_exp_3	Average	S.D.	S.E.M.
Gnorm:Normalized Conductance		-60	0.00210046	-0.00068411	0.204101	0.0685058	0.0958871	0.0553604	-0.0120175	0.0211933	-0.0195748	-0.00346633	0.0177079	0.0102236
FNorm: Normalized %ΔF/F0		-40	-0.00957079	0.0016582	-0.00259368	-0.00350209	0.004629	0.00267255	0.0172996	-0.0514134	0.0338764	-7.9123e-05	0.0369243	0.0213182
SD: Standard deviation		-20	0.0193647	-0.000482476	0.0104113	0.0097645	0.00811547	0.00468547	0.0222951	0.0351932	0.00880349	0.0220973	0.0107745	0.00622063
S.E.M.: Standard error		0							-0.0132402	0.00481767	0.255541	0.0823727	0.12267	0.0708235
		20	0.0469165	0.0172005	-0.0129352	0.0170606	0.0244346	0.0141073	0.0242836	0.021034	0.169539	0.071619	0.0692528	0.0399831
		40	0.105855	0.0931511	0.0208699	0.0732919	0.037429	0.0216096	0.012011	0.03775	0.28929	0.113017	0.125086	0.0722185
		60	0.24225	0.29646	0.185082	0.241264	0.0454756	0.0262553	0.139188	0.194028	0.477651	0.270289	0.148326	0.0856363
		80	0.539418	0.578479	0.45544	0.524446	0.0513339	0.0296376	0.451851	0.343351	0.61357	0.469591	0.111027	0.0641017
		100	0.801455	0.758518	0.666388	0.74212	0.0563471	0.032532	0.701568	0.66741	0.731458	0.700146	0.0261669	0.0151075
		120	0.937622	0.937741	0.805853	0.893739	0.0621445	0.0358791	0.865668	0.82182	0.812865	0.833451	0.0230724	0.0133209
		140	0.982477	0.978172	0.924296	0.961648	0.0264704	0.0152827	0.91098	1	1	0.970327	0.0419644	0.0242281
		160	1	1	1	1	0	0	1	0.984374	0.986991	0.990455	0.00683333	0.00394522
		Hv1-L201Anap
		7.0-7.0	Normalized Conductance							Normalized Fluorescence Changes
		Membrane potential (mV)	GNorm_exp_1	GNorm_exp_2	GNorm_exp_3	GNorm_exp_4	Average	S.D.	S.E.M.	FNorm_exp_1	FNorm_exp_2	FNorm_exp_3	FNorm_exp_4	Average	S.D.	S.E.M.
		-60	-0.000181465	-0.00108858	0.0452777	-0.0109637	0.00826099	0.0217859	0.010893	-0.016528	0.00552271	0.000786128	0.0496349	0.00985393	0.0243901	0.0121951
		-40	0.00699085	-0.000654346	0.00603216	0.0116846	0.00601331	0.00440389	0.00220195	0.00862268	0.0644649	0.0141292	0.00908651	0.0240758	0.0234184	0.0117092
		-20	-0.0263302	0.0124146	-0.0241286	0.0519346	0.00347259	0.0319318	0.0159659	0.0362535	-0.0139272	0.00213471	-0.0174104	0.00176264	0.021234	0.010617
		0								0.0160659	0.158488	0.050489	0.0870998	0.0780356	0.0528056	0.0264028
		20	0.107498	0.20405	0.343581	0.501065	0.289049	0.148417	0.0742085	0.0971874	0.198726	0.0999	0.14752	0.135833	0.041463	0.0207315
		40	0.358946	0.374469	0.664212	0.688278	0.521476	0.155099	0.0775497	0.151923	0.275396	0.163516	0.416485	0.25183	0.106592	0.053296
		60	0.559638	0.58398	0.854397	0.855788	0.713451	0.141904	0.0709518	0.318504	0.349262	0.257	0.569487	0.373563	0.117893	0.0589467
		80	0.732453	0.752012	0.926286	0.947843	0.839649	0.097958	0.048979	0.487643	0.620885	0.37729	0.714295	0.550028	0.128194	0.0640969
		100	0.859621	0.906272	0.968182	1	0.933519	0.0543706	0.0271853	0.607417	0.752172	0.487676	0.916943	0.691052	0.160561	0.0802805
		120	0.958246	0.964744	0.981006	0.999785	0.975945	0.0160675	0.00803374	0.737356	0.902791	0.608016	1	0.812041	0.150639	0.0753195
		140	0.972118	1	1		0.990706	0.0131437	0.00758853	0.837603	1	0.738422		0.858675	0.107823	0.0622517
		160	1		0.99483		0.997415	0.00258508	0.00182793	1		0.858327		0.929164	0.0708365	0.050089
		180			0.990518		0.990518	0	0			1		1	0	0
