# Supplementary material for: Activation-pathway transitions in human voltage-gated proton channels revealed by a non-canonical fluorescent amino acid
Source: eLife. 2023 Jan 25;12:e85836. doi: 10.7554/eLife.85836 (PMC9925047; doi:10.7554/eLife.85836)
Supplement: Supplementary file 1. [file elife-85836-supp1.xlsx]

## Sheet: Supplementary file 1
Figure 1 - Supplementary file 1. Boltzmann equation fit parameters of each mutant at ∆pH=1.
	Channel	V0.5 (mV)	e0	n
	hHV1-WT	34.1 ± 1.5	1.5 ± 0.1	4
	hHV1-mCherry	33.8 ± 2.5	1.3 ± 0.1	5
	V62Anap	24.4 ± 1.6	1.6 ± 0.1	3
	Q191Anap	40.9 ± 4.4	1.4 ± 0.3	13
	A197Anap	23.4 ± 1.1	1.5 ± 0.1	6
	L198Anap	15.2 ± 1.1	1.8 ± 0.1	3
	G199Anap	31.5 ± 1.0	1.6 ± 0.1	5
	L200Anap	10.2 ± 2.2	2.4 ± 0.4	1
	L201Anap	6.3 ± 2.2	1.2 ± 0.1	4
	I202Anap	-31.8 ± 0.8	1.7 ± 0.1	4
	F150A-A197Anap	22.7 ± 2.3	0.9 ± 0.1	4
