# Supplementary material for: Activation-pathway transitions in human voltage-gated proton channels revealed by a non-canonical fluorescent amino acid
Source: eLife. 2023 Jan 25;12:e85836. doi: 10.7554/eLife.85836 (PMC9925047; doi:10.7554/eLife.85836)
Supplement: Supplementary file 2. — Parameters with values labeled in bold indicate that these are ∆pH dependent. [file elife-85836-supp2.xlsx]

## Sheet: Supplementary file 2
	Supplementary file 2. Parameters used in the fits to the data in Figure 5D of the model in Scheme I.
		∆pH =0		∆pH =2
	Rate constant	@ 0 mV, (s-1)	Partial charge, (eo)	@ 0 mV, (s-1)2	Partial charge, (eo)3	State	Fluorescence, (a.u.)
	k01	0.15	0.3	0.8	0.3	0	0
	k10	5	-0.3	5	-0.3	1	1
	k12	2	0.4	16	0.4	2	2
	k21	0.06	-0.3	1	-0.3	3	4
	k23	0.1	0.8	0.88	0.8
	k32	0.5	-0.8	1	-0.8
	Parameters with values labeled in bold indicate that these are ∆pH-dependent
