# Supplementary material for: Activation-pathway transitions in human voltage-gated proton channels revealed by a non-canonical fluorescent amino acid
Source: eLife. 2023 Jan 25;12:e85836. doi: 10.7554/eLife.85836 (PMC9925047; doi:10.7554/eLife.85836)
Supplement: Supplementary file 3. — Parameter with values labeled in bold indicate that these are ∆pH dependent. [file elife-85836-supp3.xlsx]

## Sheet: Supplementary file 3
	Supplementary file 3. Parameters used in the simulations with Scheme II shown in Figure 5 Supplement 2.
		∆pH =0		∆pH =2
	Rate constant	@ 0 mV, (s-1)	Partial charge, (eo)	@ 0 mV, (s-1)2	Partial charge, (eo)3	State	Fluorescence, (a.u.)
	k01	0.1*B	0.5	0.1*B	0.4	0	0
	k10	1/B	-0.3	1/B	-0.3	1	0
	k12	0.5*B	1.1	0.5*B	1.1	2	0
	k21	0.5/B	-0.4	0.5/B	-0.4	3	3
	k23	2*B	0.6	2*B	0.6	4	5
	k32	0.02/B	-0.3	200/B	-0.3	5	6
	k14	1*B*D	0.5	1*B*D	0.5	6	6
	k41	3/B	-0.6	3/B	-0.6
	k25	1*B*D2	0.5	1*B*D2	0.5
	k52	3/B	-0.6	3/B	-0.6
	k36	1*B*C	0.5	1*B*C	0.5
	k63	3/B	-0.6	3/B	-0.6
	k45	1*B*D3	1.1	1*B*D3	1.1
	k54	3/B	-0.4	3/B	-0.4
	k56	1*B	0.6	1*B	0.6
	k65	0.1/B	-0.3	0.1/B	-0.3
	B	0.33		5
	D	2		2
	Parameter with values labeled in bold indicate that these are ∆pH-dependent.
